# Supplementary material for: Structural (XRD) Characterization and an Analysis of H-Bonding Motifs in Some Tetrahydroxidohexaoxidopentaborate(1-) Salts of N-Substituted Guanidinium Cations
Source: MDPI journal article supplement (doi:10.3390/molecules28073273), 2023-04-06
Supplement: s1 [file s1]

# Electronic Supplementary Data

## X-ray data for 1-6

**Structural (XRD) characterization and an analysis of H-bonding motifs in some tetrahydroxidohexaoxidopentaborate(1-) salts of *N*-substituted guanidinium cations**

**Michael A. Beckett<sup>1\*</sup>, Simon J. Coles<sup>2</sup>, Peter N. Horton<sup>2</sup>, and Thomas A. Rixon<sup>1</sup>**

1 School of Natural Sciences, Bangor University, Bangor, Gwynedd, LL57 2UW, UK,

2 Chemistry Department, University of Southampton, Southampton, SO17 1BJ, UK;

\* Correspondence: [m.a.beckett@bangor.ac.uk](mailto:m.a.beckett@bangor.ac.uk)

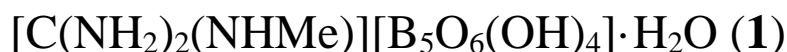

Submitted by: **Mike A Beckett / Tom Rixon**  
Bangor University

Solved by: **Peter N Horton**

Sample ID: **MAB/TR/Me|GaunB5**

**$R_1=2.67\%$**

## Crystal Data and Experimental

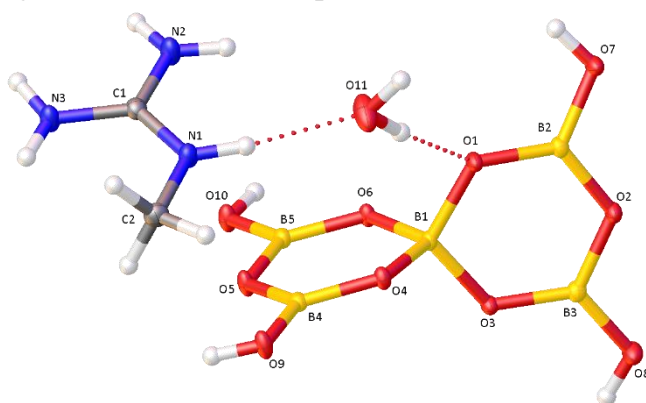

$\text{mm}^{-1}$ , 17592 reflections measured, 2893 unique ( $R_{\text{int}} = 0.0115$ ) which were used in all calculations. The final  $wR_2$  was 0.0743 (all data) and  $R_1$  was 0.0267 ( $I > 2(I)$ ).

**Experimental.** Single colourless block crystals of **2019NCSX0350** were recrystallised from water. A suitable crystal with dimensions  $0.400 \times 0.400 \times 0.200 \text{ mm}^3$  was selected and mounted on a MITIGEN holder in perfluoroether oil on a Rigaku FRE+ equipped with VHF Varimax confocal mirrors and an AFC12 goniometer and HyPix 6000 detector diffractometer. The crystal was kept at a steady  $T = 100(2) \text{ K}$  during data collection. The structure was solved with the **ShelXT** 2018/2 (Sheldrick, 2018) solution program using dual methods and by using **Olex2** (Dolomanov et al., 2009) as the graphical interface. The model was refined with **ShelXL** 2018/3 (Sheldrick, 2015) using full matrix least squares minimisation on  $F^2$ .

**Crystal Data.**  $\text{C}_2\text{H}_{14}\text{B}_5\text{N}_3\text{O}_{11}$ ,  $M_r = 310.21$ , monoclinic,  $P2_1/c$  (No. 14),  $a = 9.9962(2) \text{ \AA}$ ,  $b = 10.9047(2) \text{ \AA}$ ,  $c = 11.7215(2) \text{ \AA}$ ,  $\beta = 96.101(2)^\circ$ ,  $\alpha = \gamma = 90^\circ$ ,  $V = 1270.47(4) \text{ \AA}^3$ ,  $T = 100(2) \text{ K}$ ,  $Z = 4$ ,  $Z' = 1$ ,  $\mu(\text{Mo K}\alpha) = 0.151$

|                                                |                                                                              |
|------------------------------------------------|------------------------------------------------------------------------------|
| <b>Compound</b>                                | <b>2019NCSX0350</b>                                                          |
| Formula                                        | C <sub>2</sub> H <sub>14</sub> B <sub>5</sub> N <sub>3</sub> O <sub>11</sub> |
| <i>D</i> <sub>calc.</sub> / g cm <sup>-3</sup> | 1.622                                                                        |
| $\mu$ /mm <sup>-1</sup>                        | 0.151                                                                        |
| Formula Weight                                 | 310.21                                                                       |
| Colour                                         | colourless                                                                   |
| Shape                                          | block                                                                        |
| Size/mm <sup>3</sup>                           | 0.400×0.400×0.200                                                            |
| <i>T</i> /K                                    | 100(2)                                                                       |
| Crystal System                                 | monoclinic                                                                   |
| Space Group                                    | <i>P</i> 2 <sub>1</sub> / <i>c</i>                                           |
| <i>a</i> /Å                                    | 9.9962(2)                                                                    |
| <i>b</i> /Å                                    | 10.9047(2)                                                                   |
| <i>c</i> /Å                                    | 11.7215(2)                                                                   |
| $\alpha$ /°                                    | 90                                                                           |
| $\beta$ /°                                     | 96.101(2)                                                                    |
| $\gamma$ /°                                    | 90                                                                           |
| <i>V</i> /Å <sup>3</sup>                       | 1270.47(4)                                                                   |
| <i>Z</i>                                       | 4                                                                            |
| <i>Z</i> '                                     | 1                                                                            |
| Wavelength/Å                                   | 0.71075                                                                      |
| Radiation type                                 | Mo K $\alpha$                                                                |
| $\theta_{min}$ /°                              | 2.558                                                                        |
| $\theta_{max}$ /°                              | 27.485                                                                       |
| Measured Refl's.                               | 17592                                                                        |
| Ind't Refl's                                   | 2893                                                                         |
| Refl's with <i>I</i> > 2( <i>I</i> )           | 2810                                                                         |
| <i>R</i> <sub>int</sub>                        | 0.0115                                                                       |
| Parameters                                     | 235                                                                          |
| Restraints                                     | 0                                                                            |
| Largest Peak                                   | 0.246                                                                        |
| Deepest Hole                                   | -0.233                                                                       |
| GooF                                           | 1.071                                                                        |
| <i>wR</i> <sub>2</sub> (all data)              | 0.0743                                                                       |
| <i>wR</i> <sub>2</sub>                         | 0.0737                                                                       |
| <i>R</i> <sub>1</sub> (all data)               | 0.0275                                                                       |
| <i>R</i> <sub>1</sub>                          | 0.0267                                                                       |

## Structure Quality Indicators

|              |                 |                   |               |                         |
|--------------|-----------------|-------------------|---------------|-------------------------|
| Reflections: | d min (Mo) 0.77 | I/ $\sigma$ 141.6 | Rint 1.15%    | complete 99% (IUCr) 99% |
| Refinement:  | Shift 0.000     | Max Peak 0.2      | Min Peak -0.2 | Goof 1.071              |

A colourless block-shaped crystal with dimensions  $0.400 \times 0.400 \times 0.200$  mm<sup>3</sup> was mounted on a MITIGEN holder in perfluoroether oil. Data were collected using a Rigaku FRE+ equipped with VHF Varimax confocal mirrors and an AFC12 goniometer and HyPix 6000 detector diffractometer equipped with an Oxford Cryosystems low-temperature device operating at  $T = 100(2)$  K.

Data were measured using profile data from  $\omega$ -scans  $0.5^\circ$  per frame for 0.5 s using MoK $\alpha$  radiation (Rotating Anode, 45.0 kV, 55.0 mA). The diffraction pattern was indexed and the total number of runs and images was based on the strategy calculation from the program **CrysAlisPro** (Rigaku, V1.171.40.53, 2019). The maximum resolution that was achieved was  $\Theta = 27.485^\circ$  (0.77 Å).

The diffraction pattern was indexed and the total number of runs and images was based on the strategy calculation from the program **CrysAlisPro** (Rigaku, V1.171.40.53, 2019). The unit cell was refined using **CrysAlisPro** (Rigaku, V1.171.40.53, 2019) on 14324 reflections, 81% of the observed reflections.

Data reduction, scaling and absorption corrections were performed using **CrysAlisPro** (Rigaku, V1.171.40.53, 2019). The final completeness is 99.20 % out to  $27.485^\circ$  in  $\Theta$ . A multi-scan absorption correction was performed using CrysAlisPro 1.171.40.53 (Rigaku Oxford Diffraction, 2019) using spherical harmonics as implemented in SCALE3 ABSPACK. The absorption coefficient  $\mu$  of this material is  $0.151$  mm<sup>-1</sup> at this wavelength ( $\lambda = 0.71075$  Å) and the minimum and maximum transmissions are 0.947 and 1.000.

The structure was solved and the space group  $P2_1/c$  (# 14) determined by the ShelXT 2018/2 (Sheldrick, 2018) structure solution program using dual methods and refined by full matrix least squares minimisation on  $F^2$  using version 2018/3 of ShelXL 2018/3 (Sheldrick, 2015). All non-hydrogen atoms were refined anisotropically. Most hydrogen atom positions were calculated geometrically and refined using the riding model, but some hydrogen atoms were refined freely.

*\_exptl\_absorpt\_process\_details*: CrysAlisPro 1.171.40.53 (Rigaku Oxford Diffraction, 2019) using spherical harmonics as implemented in SCALE3 ABSPACK.

There is a single molecule in the asymmetric unit, which is represented by the reported sum formula. In other words: Z is 4 and Z' is 1.

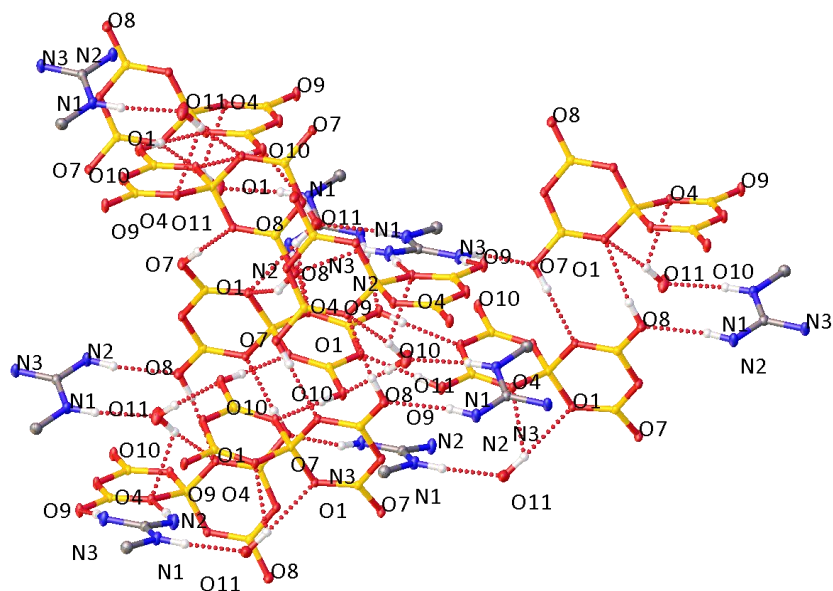

**Figure S1:** The following hydrogen bonding interactions with a maximum D-D distance of 3.1 Å and a minimum angle of 120 ° are present in **2019NCSX0350**: O10–O6\_1: 2.702 Å, O9–O5\_2: 2.818 Å, O7–O3\_3: 2.767 Å, O8–O1\_5: 3.046 Å, O11–O4: 3.079 Å, O11–O1: 3.043 Å, O11–O10\_4: 2.856 Å, N1–O11: 2.83 Å, N3–O9\_6: 3.013 Å, N3–O7\_7: 2.995 Å, N2–O4\_6: 2.962 Å, N2–O8\_3: 3.038 Å.

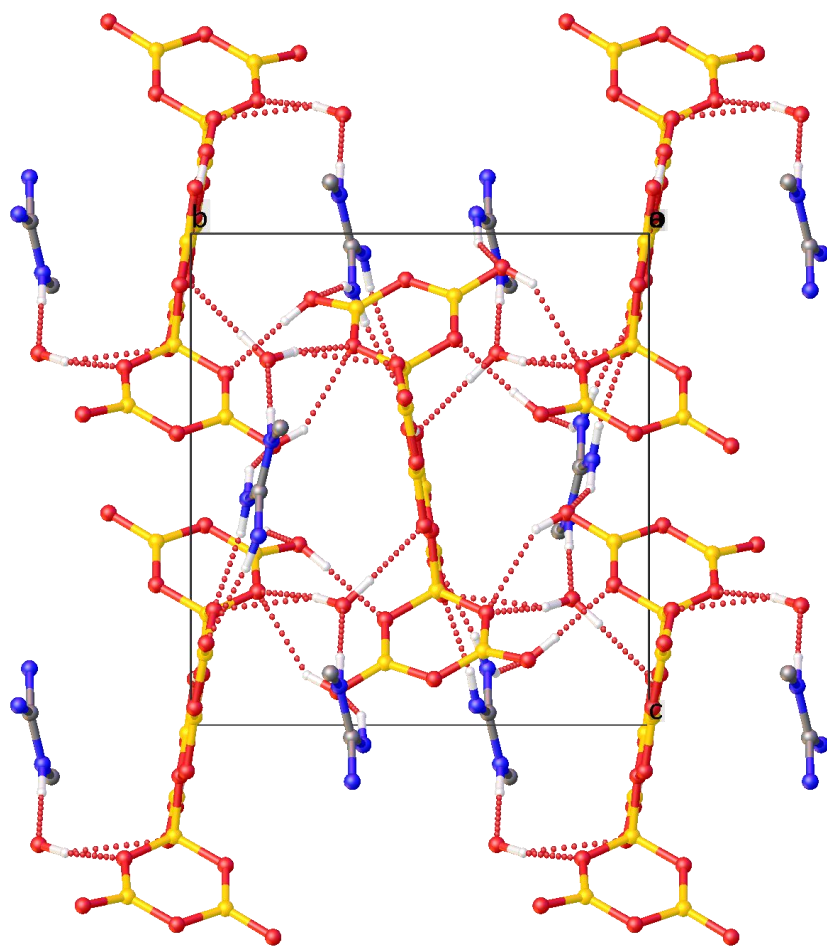

**Figure S1:** Packing diagram of 2019NCSX0350.

**Table S1:** Fractional Atomic Coordinates ( $\times 10^4$ ) and Equivalent Isotropic Displacement Parameters ( $\text{\AA}^2 \times 10^3$ ) for **2019NCSX0350**.  $U_{eq}$  is defined as 1/3 of the trace of the orthogonalised  $U_{ij}$ .

| Atom | x          | y         | z         | $U_{eq}$  |
|------|------------|-----------|-----------|-----------|
| O1   | 535.3(6)   | 6452.7(6) | 2282.5(5) | 10.94(14) |
| O2   | -944.9(6)  | 5308.1(6) | 936.8(5)  | 12.12(14) |
| O3   | 748.8(6)   | 4242.1(6) | 2143.6(5) | 10.14(14) |
| O4   | 2685.5(6)  | 5501.8(6) | 2657.1(5) | 10.37(14) |
| O5   | 3313.7(6)  | 5078.7(6) | 4644.2(5) | 12.39(14) |
| O6   | 983.5(6)   | 5242.9(6) | 3960.2(5) | 10.69(14) |
| O7   | -1433.8(6) | 7356.8(6) | 1324.5(6) | 14.04(15) |
| O8   | -675.4(7)  | 3204.5(6) | 683.9(6)  | 15.97(15) |
| O9   | 4958.1(6)  | 5334.5(6) | 3332.8(6) | 13.99(15) |
| O10  | 1699.2(6)  | 4907.2(7) | 5936.8(5) | 13.75(15) |
| B1   | 1244.2(9)  | 5363.8(9) | 2740.4(8) | 9.19(18)  |
| B2   | -582.0(9)  | 6383.4(9) | 1510.8(8) | 10.58(19) |
| B3   | -259.3(10) | 4243.6(9) | 1266.7(8) | 11.08(19) |
| B4   | 3646.6(10) | 5306.3(9) | 3537.1(8) | 10.17(18) |
| B5   | 1965.1(10) | 5075.7(9) | 4833.9(8) | 10.46(19) |
| O11  | 2806.5(8)  | 8321.6(8) | 2567.4(7) | 26.06(19) |
| N1   | 5096.0(8)  | 8241.1(8) | 4207.5(7) | 14.88(17) |
| N2   | 3506.4(8)  | 8761.8(9) | 5400.5(7) | 17.74(18) |
| N3   | 5713.6(8)  | 8524.5(8) | 6149.4(7) | 15.86(17) |
| C1   | 4775.6(9)  | 8507.1(8) | 5250.4(8) | 12.74(18) |
| C2   | 6473.3(9)  | 8045.3(9) | 3947.2(8) | 16.04(19) |

**Table S2:** Anisotropic Displacement Parameters ( $\times 10^4$ ) for **2019NCSX0350**. The anisotropic displacement factor exponent takes the form:  $-2\pi^2[h^2a^{*2} \times U_{11} + \dots + 2hka^* \times b^* \times U_{12}]$

| Atom | $U_{11}$ | $U_{22}$ | $U_{33}$ | $U_{23}$ | $U_{13}$ | $U_{12}$ |
|------|----------|----------|----------|----------|----------|----------|
| O1   | 10.3(3)  | 9.4(3)   | 12.2(3)  | -0.4(2)  | -3.1(2)  | 0.4(2)   |
| O2   | 11.8(3)  | 11.0(3)  | 12.4(3)  | -0.5(2)  | -3.9(2)  | 0.4(2)   |
| O3   | 9.9(3)   | 8.9(3)   | 11.0(3)  | 0.3(2)   | -1.8(2)  | -0.1(2)  |
| O4   | 7.7(3)   | 14.3(3)  | 8.9(3)   | 1.4(2)   | -0.1(2)  | -0.5(2)  |
| O5   | 7.0(3)   | 20.7(3)  | 9.1(3)   | 1.9(2)   | -0.6(2)  | 0.4(2)   |
| O6   | 6.8(3)   | 16.4(3)  | 8.7(3)   | 0.1(2)   | 0.2(2)   | 0.2(2)   |
| O7   | 12.6(3)  | 11.3(3)  | 16.9(3)  | -2.4(3)  | -5.0(2)  | 2.1(2)   |
| O8   | 17.8(3)  | 11.1(3)  | 17.3(3)  | -0.6(3)  | -5.6(3)  | -0.2(3)  |
| O9   | 7.7(3)   | 23.5(4)  | 10.5(3)  | 2.7(3)   | -0.4(2)  | 0.0(2)   |
| O10  | 8.0(3)   | 23.7(4)  | 9.4(3)   | 0.6(2)   | 0.3(2)   | -0.4(2)  |
| B1   | 7.6(4)   | 10.8(4)  | 8.8(4)   | 0.3(3)   | -0.9(3)  | -0.2(3)  |
| B2   | 9.4(4)   | 12.0(4)  | 10.1(4)  | 1.4(3)   | 0.0(3)   | -0.3(3)  |
| B3   | 10.8(4)  | 11.9(5)  | 10.5(4)  | 0.9(3)   | 0.9(3)   | -1.0(3)  |
| B4   | 9.4(4)   | 10.2(4)  | 10.7(4)  | 0.1(3)   | 0.4(3)   | -0.2(3)  |
| B5   | 8.6(4)   | 11.9(4)  | 10.7(4)  | -0.6(3)  | 0.0(3)   | 0.0(3)   |
| O11  | 25.8(4)  | 22.6(4)  | 26.8(4)  | 9.1(3)   | -11.1(3) | -8.3(3)  |
| N1   | 13.4(4)  | 19.5(4)  | 11.2(4)  | -1.6(3)  | -0.9(3)  | 2.5(3)   |
| N2   | 11.2(4)  | 27.8(5)  | 13.8(4)  | -2.7(3)  | -0.9(3)  | 3.2(3)   |
| N3   | 10.7(4)  | 25.2(4)  | 11.5(4)  | -1.5(3)  | 0.1(3)   | 2.6(3)   |
| C1   | 12.9(4)  | 12.1(4)  | 13.0(4)  | 0.8(3)   | 0.3(3)   | 0.1(3)   |
| C2   | 15.7(4)  | 18.3(4)  | 14.5(4)  | -0.9(3)  | 3.6(3)   | 1.4(3)   |

**Table S3:** Bond Lengths in Å for **2019NCSX0350**.

| Atom | Atom | Length/Å   |
|------|------|------------|
| O1   | B1   | 1.4558(11) |
| O1   | B2   | 1.3626(11) |
| O2   | B2   | 1.3811(11) |
| O2   | B3   | 1.3821(12) |
| O3   | B1   | 1.4687(11) |
| O3   | B3   | 1.3608(11) |
| O4   | B1   | 1.4622(10) |
| O4   | B4   | 1.3497(11) |
| O5   | B4   | 1.3958(11) |
| O5   | B5   | 1.3895(11) |
| O6   | B1   | 1.4862(11) |
| O6   | B5   | 1.3532(11) |
| O7   | B2   | 1.3637(11) |
| O8   | B3   | 1.3651(12) |
| O9   | B4   | 1.3578(11) |
| O10  | B5   | 1.3597(11) |
| N1   | C1   | 1.3282(12) |
| N1   | C2   | 1.4572(12) |
| N2   | C1   | 1.3286(12) |
| N3   | C1   | 1.3342(12) |

**Table S4:** Bond Angles in ° for **2019NCSX0350**.

| Atom | Atom | Atom | Angle/°   |
|------|------|------|-----------|
| B2   | O1   | B1   | 122.15(7) |
| B2   | O2   | B3   | 118.68(7) |
| B3   | O3   | B1   | 122.94(7) |
| B4   | O4   | B1   | 124.00(7) |
| B5   | O5   | B4   | 118.72(7) |
| B5   | O6   | B1   | 123.57(7) |
| O1   | B1   | O3   | 112.18(7) |
| O1   | B1   | O4   | 109.63(7) |
| O1   | B1   | O6   | 107.38(7) |
| O3   | B1   | O6   | 107.44(7) |
| O4   | B1   | O3   | 109.80(7) |
| O4   | B1   | O6   | 110.37(7) |
| O1   | B2   | O2   | 121.66(8) |
| O1   | B2   | O7   | 121.13(8) |
| O7   | B2   | O2   | 117.10(8) |
| O3   | B3   | O2   | 121.18(8) |
| O3   | B3   | O8   | 122.60(8) |
| O8   | B3   | O2   | 116.20(8) |
| O4   | B4   | O5   | 121.19(8) |
| O4   | B4   | O9   | 118.94(8) |
| O9   | B4   | O5   | 119.87(8) |
| O6   | B5   | O5   | 121.09(8) |
| O6   | B5   | O10  | 122.58(8) |
| O10  | B5   | O5   | 116.33(8) |
| C1   | N1   | C2   | 123.39(8) |
| N1   | C1   | N2   | 119.65(8) |
| N1   | C1   | N3   | 120.80(8) |
| N2   | C1   | N3   | 119.55(8) |



**Table S5:** Torsion Angles in ° for **2019NCSX0350**.

| Atom | Atom | Atom | Atom | Angle/°    |
|------|------|------|------|------------|
| B1   | O1   | B2   | O2   | -13.84(13) |
| B1   | O1   | B2   | O7   | 162.17(8)  |
| B1   | O3   | B3   | O2   | -4.55(12)  |
| B1   | O3   | B3   | O8   | 177.13(8)  |
| B1   | O4   | B4   | O5   | -6.99(13)  |
| B1   | O4   | B4   | O9   | 173.07(8)  |
| B1   | O6   | B5   | O5   | 3.89(13)   |
| B1   | O6   | B5   | O10  | -176.69(8) |
| B2   | O1   | B1   | O3   | 9.07(11)   |
| B2   | O1   | B1   | O4   | 131.33(8)  |
| B2   | O1   | B1   | O6   | -108.75(8) |
| B2   | O2   | B3   | O3   | 0.46(13)   |
| B2   | O2   | B3   | O8   | 178.88(7)  |
| B3   | O2   | B2   | O1   | 8.68(13)   |
| B3   | O2   | B2   | O7   | -167.49(8) |
| B3   | O3   | B1   | O1   | -0.07(11)  |
| B3   | O3   | B1   | O4   | -122.23(8) |
| B3   | O3   | B1   | O6   | 117.72(8)  |
| B4   | O4   | B1   | O1   | 129.99(8)  |
| B4   | O4   | B1   | O3   | -106.35(9) |
| B4   | O4   | B1   | O6   | 11.91(11)  |
| B4   | O5   | B5   | O6   | 2.48(13)   |
| B4   | O5   | B5   | O10  | -176.98(8) |
| B5   | O5   | B4   | O4   | -1.03(13)  |
| B5   | O5   | B4   | O9   | 178.91(8)  |
| B5   | O6   | B1   | O1   | -129.81(8) |
| B5   | O6   | B1   | O3   | 109.33(9)  |
| B5   | O6   | B1   | O4   | -10.36(11) |
| C2   | N1   | C1   | N2   | 175.01(9)  |
| C2   | N1   | C1   | N3   | -4.83(14)  |

**Table S6:** Hydrogen Fractional Atomic Coordinates ( $\times 10^4$ ) and Equivalent Isotropic Displacement Parameters ( $\text{\AA}^2 \times 10^3$ ) for **2019NCSX0350**.  $U_{eq}$  is defined as 1/3 of the trace of the orthogonalised  $U_{ij}$ .

| Atom | x         | y        | z        | $U_{eq}$ |
|------|-----------|----------|----------|----------|
| H7   | -1194(16) | 7943(15) | 1771(14) | 33(4)    |
| H8   | -360(16)  | 2543(16) | 1011(14) | 36(4)    |
| H9   | 5443(17)  | 5197(15) | 3934(15) | 38(4)    |
| H10  | 851(18)   | 4890(16) | 5983(14) | 39(4)    |
| H11A | 2541(16)  | 8896(16) | 2062(14) | 39(4)    |
| H11B | 2191(18)  | 7746(19) | 2401(15) | 51(5)    |
| H1   | 4438(15)  | 8257(14) | 3626(13) | 28(4)    |
| H2A  | 3297(14)  | 8904(13) | 6089(12) | 24(3)    |
| H2B  | 2915(15)  | 8721(14) | 4815(13) | 29(4)    |
| H3A  | 6561(15)  | 8351(14) | 6063(12) | 27(3)    |
| H3B  | 5488(13)  | 8800(13) | 6799(12) | 23(3)    |
| H2C  | 6816.45   | 7276.73  | 4299.4   | 24       |
| H2D  | 7039.08   | 8728.44  | 4253.18  | 24       |
| H2E  | 6490.49   | 7998.96  | 3113.93  | 24       |

**Table S7:** Hydrogen Bond information for **2019NCSX0350**.

| D  | H  | A               | d(D-H)/\AA | d(H-A)/\AA | d(D-A)/\AA | D-H-A/deg |
|----|----|-----------------|------------|------------|------------|-----------|
| O7 | H7 | O3 <sup>1</sup> | 0.845(17)  | 1.924(17)  | 2.7674(9)  | 175.8(16) |

| D   | H    | A                | d(D-H)/Å  | d(H-A)/Å  | d(D-A)/Å   | D-H-A/deg |
|-----|------|------------------|-----------|-----------|------------|-----------|
| O8  | H8   | O1 <sup>2</sup>  | 0.861(17) | 2.350(17) | 3.0462(9)  | 138.3(14) |
| O9  | H9   | O5 <sup>3</sup>  | 0.825(17) | 1.994(18) | 2.8177(9)  | 177.0(17) |
| O10 | H10  | O6 <sup>4</sup>  | 0.855(18) | 1.848(18) | 2.7022(9)  | 176.4(17) |
| O11 | H11A | O10 <sup>5</sup> | 0.883(18) | 1.979(18) | 2.8564(10) | 172.3(15) |
| O11 | H11B | O1               | 0.89(2)   | 2.17(2)   | 3.0428(10) | 169.2(16) |
| O11 | H11B | O4               | 0.89(2)   | 2.51(2)   | 3.0795(10) | 122.8(15) |
| N1  | H1   | O11              | 0.895(15) | 1.943(15) | 2.8295(11) | 170.2(14) |
| N2  | H2A  | O4 <sup>6</sup>  | 0.868(14) | 2.101(15) | 2.9624(10) | 171.5(13) |
| N2  | H2B  | O8 <sup>1</sup>  | 0.858(15) | 2.322(15) | 3.0379(11) | 141.1(13) |
| N3  | H3A  | O7 <sup>7</sup>  | 0.884(15) | 2.140(15) | 2.9954(10) | 162.8(13) |
| N3  | H3B  | O9 <sup>6</sup>  | 0.870(14) | 2.146(15) | 3.0132(10) | 174.1(13) |

1-  $x, 1/2+y, 1/2-z$ ; 2-  $x, -1/2+y, 1/2-z$ ; 3-  $1-x, 1-y, 1-z$ ; 4-  $x, 1-y, 1-z$ ; 5-  $x, 3/2-y, -1/2+z$ ; 6-  $x, 3/2-y, 1/2+z$ ; 7-  $1+x, 3/2-y, 1/2$

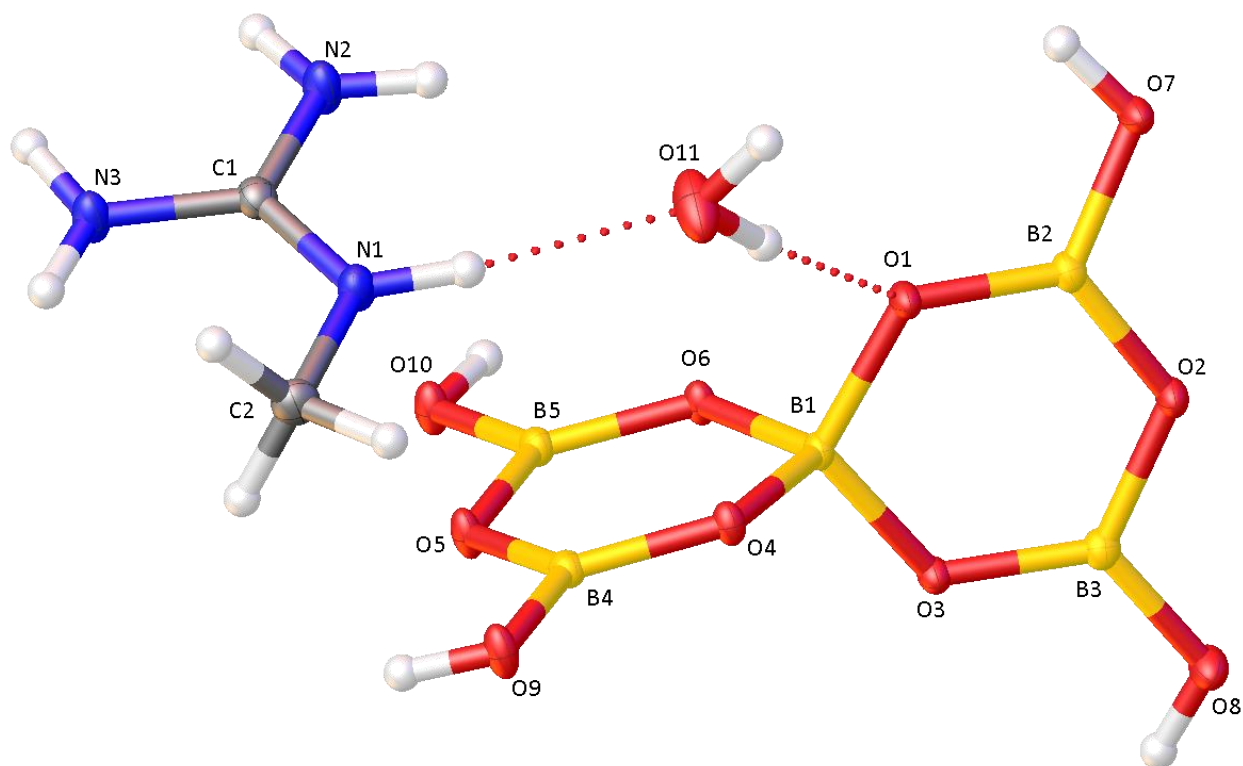

## Citations

CrysAlisPro Software System, Rigaku Oxford Diffraction, (2019).

O.V. Dolomanov and L.J. Bourhis and R.J. Gildea and J.A.K. Howard and H. Puschmann, Olex2: A complete structure solution, refinement and analysis program, *J. Appl. Cryst.*, (2009), **42**, 339-341.

Sheldrick, G.M., Crystal structure refinement with ShelXL, *Acta Cryst.*, (2015), **C27**, 3-8.

Sheldrick, G.M., ShelXT-Integrated space-group and crystal-structure determination, *Acta Cryst.*, (2015), **A71**, 3-8.

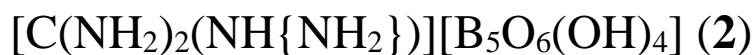

Submitted by: **Mike A Beckett / Tom Rixon**

Bangor University

Solved by: **Peter N Horton**

Sample ID: **MAB/TR/AmGuan B5**

## Crystal Data and Experimental

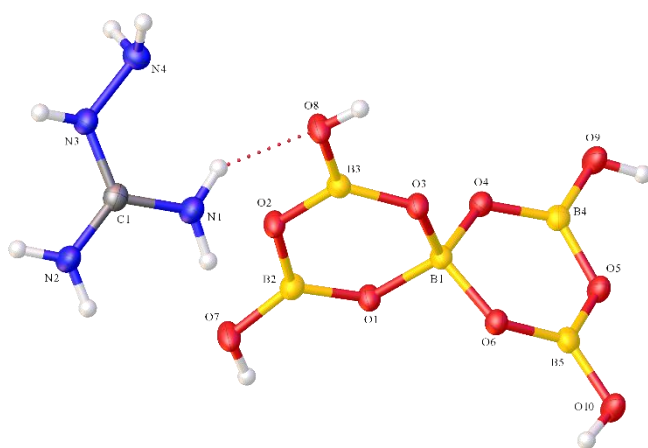

was 0.0827 (all data) and  $R_1$  was 0.0294 ( $I > 2(I)$ ).

**Experimental.** Single colourless block-shaped crystals of **2019NCS0257** were recrystallised from water. A suitable crystal  $0.250 \times 0.090 \times 0.040 \text{ mm}^3$  was selected and mounted on a MITIGEN holder in perfluoroether oil on a Rigaku 007HF equipped with Varimax confocal mirrors and an AFC11 goniometer and HyPix 6000 detector diffractometer. The crystal was kept at a steady  $T = 100(2) \text{ K}$  during data collection. The structure was solved with the **ShelXT** (Sheldrick, 2015) structure solution program using the Intrinsic Phasing solution method and by using **Olex2** (Dolomanov et al., 2009) as the graphical interface. The model was refined with version 2018/3 of **ShelXL** (Sheldrick, 2015) using Least Squares minimisation.

**Crystal Data.**  $\text{CH}_{11}\text{B}_5\text{N}_4\text{O}_{10}$ ,  $M_r = 293.19$ , triclinic,  $P-1$  (No. 2),  $a = 7.4870(2) \text{ \AA}$ ,  $b = 8.5076(2) \text{ \AA}$ ,  $c = 9.6502(2) \text{ \AA}$ ,  $\alpha = 93.906(2)^\circ$ ,  $\beta = 98.470(2)^\circ$ ,  $\gamma = 96.457(2)^\circ$ ,  $V = 601.88(3) \text{ \AA}^3$ ,  $T = 100(2) \text{ K}$ ,  $Z = 2$ ,  $Z' = 1$ ,  $\mu(\text{CuK}\alpha) = 1.341 \text{ mm}^{-1}$ , 11885 reflections measured, 2142 unique ( $R_{\text{int}} = 0.0404$ ) which were used in all calculations. The final  $wR_2$

|                                                |                                                                |
|------------------------------------------------|----------------------------------------------------------------|
| <b>Compound</b>                                | <b>2019NCS0257</b>                                             |
| Formula                                        | CH <sub>11</sub> B <sub>5</sub> N <sub>4</sub> O <sub>10</sub> |
| <i>D</i> <sub>calc.</sub> / g cm <sup>-3</sup> | 1.618                                                          |
| $\mu$ /mm <sup>-1</sup>                        | 1.341                                                          |
| Formula Weight                                 | 293.19                                                         |
| Colour                                         | colourless                                                     |
| Shape                                          | block                                                          |
| Size/mm <sup>3</sup>                           | 0.250×0.090×0.040                                              |
| <i>T</i> /K                                    | 100(2)                                                         |
| Crystal System                                 | triclinic                                                      |
| Space Group                                    | <i>P</i> -1                                                    |
| <i>a</i> /Å                                    | 7.4870(2)                                                      |
| <i>b</i> /Å                                    | 8.5076(2)                                                      |
| <i>c</i> /Å                                    | 9.6502(2)                                                      |
| $\alpha$ /°                                    | 93.906(2)                                                      |
| $\beta$ /°                                     | 98.470(2)                                                      |
| $\gamma$ /°                                    | 96.457(2)                                                      |
| <i>V</i> /Å <sup>3</sup>                       | 601.88(3)                                                      |
| <i>Z</i>                                       | 2                                                              |
| <i>Z</i> '                                     | 1                                                              |
| Wavelength/Å                                   | 1.54178                                                        |
| Radiation type                                 | CuK $\alpha$                                                   |
| $\theta_{min}$ /°                              | 4.650                                                          |
| $\theta_{max}$ /°                              | 68.215                                                         |
| Measured Refl.                                 | 11885                                                          |
| Independent Refl.                              | 2142                                                           |
| Reflections with <i>I</i> > 2( <i>I</i> )      | 2060                                                           |
| <i>R</i> <sub>int</sub>                        | 0.0404                                                         |
| Parameters                                     | 225                                                            |
| Restraints                                     | 0                                                              |
| Largest Peak                                   | 0.201                                                          |
| Deepest Hole                                   | -0.236                                                         |
| Goof                                           | 1.040                                                          |
| <i>wR</i> <sub>2</sub> (all data)              | 0.0827                                                         |
| <i>wR</i> <sub>2</sub>                         | 0.0818                                                         |
| <i>R</i> <sub>1</sub> (all data)               | 0.0302                                                         |
| <i>R</i> <sub>1</sub>                          | 0.0294                                                         |

### Structure Quality Indicators

|                     |                 |                          |                               |                     |
|---------------------|-----------------|--------------------------|-------------------------------|---------------------|
| <b>Reflections:</b> | d min (Cu) 0.83 | <i>I</i> / $\sigma$ 54.1 | <i>R</i> <sub>int</sub> 4.04% | complete 98% (IUCr) |
| <b>Refinement:</b>  | Shift -0.001    | Max Peak 0.2             | Min Peak -0.2                 | Goof 1.040          |

A colourless block-shaped crystal with dimensions 0.250×0.090×0.040 mm<sup>3</sup> was mounted on a MITIGEN holder in perfluoroether oil. Data were collected using a Rigaku 007HF equipped with Varimax confocal mirrors and an AFC11 goniometer and HyPix 6000 detector diffractometer equipped with an Oxford Cryosystems low-temperature device operating at *T* = 100(2) K.

Data were measured using profile data from  $\omega$ -scans 0.5 ° per frame for 0.5 s using CuK $\alpha$  radiation (Rotating Anode, 40.0 kV, 30.0 mA). The total number of runs and images was based on the strategy calculation from the program **CrysAlisPro** (Rigaku, V1.171.40.45a, 2019). The maximum resolution that was achieved was  $\theta$  = 68.215° (0.83 Å).

The diffraction pattern was indexed. The total number of runs and images was based on the strategy calculation from the program **CrysAlisPro** (Rigaku, V1.171.40.45a, 2019) and the unit cell was refined using

**CrysAlisPro** (Rigaku, V1.171.40.45a, 2019) on 10327 reflections, 87% of the observed reflections.

Data reduction, scaling and absorption corrections were performed using **CrysAlisPro** (Rigaku, V1.171.40.45a, 2019). The final completeness is 98.00 % out to  $68.215^\circ$  in  $\theta$ . A multi-scan absorption correction was performed using CrysAlisPro 1.171.40.45a (Rigaku Oxford Diffraction, 2019) using spherical harmonics as implemented in SCALE3 ABSPACK. The absorption coefficient  $\mu$  of this material is  $1.341 \text{ mm}^{-1}$  at this wavelength ( $\lambda = 1.54178 \text{ \AA}$ ) and the minimum and maximum transmissions are 0.801 and 1.000.

The structure was solved and the space group  $P-1$  (# 2) determined by the **ShelXT** (Sheldrick, 2015) structure solution program using Intrinsic Phasing and refined by Least Squares using version 2018/3 of **ShelXL** (Sheldrick, 2015). All non-hydrogen atoms were refined anisotropically.

*\_exptl\_absorpt\_process\_details*: CrysAlisPro 1.171.40.45a (Rigaku Oxford Diffraction, 2019) using spherical harmonics as implemented in SCALE3 ABSPACK.

There is a single molecule in the asymmetric unit, which is represented by the reported sum formula. In other words: Z is 2 and Z' is 1.

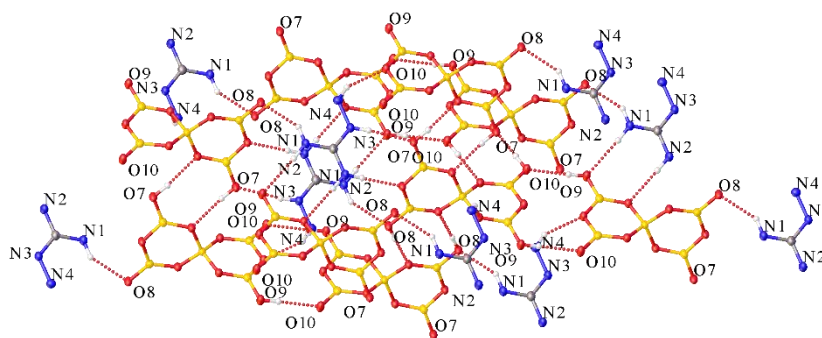

**Figure S2:** The following hydrogen bonding interactions with a maximum D-D distance of  $3.7 \text{ \AA}$  and a minimum angle of  $120^\circ$  are present in **2019NCS0257**: O7–O1<sub>1</sub>:  $2.776 \text{ \AA}$ , O10–O6<sub>2</sub>:  $2.733 \text{ \AA}$ , O8–O3<sub>3</sub>:  $2.74 \text{ \AA}$ , O9–O10<sub>4</sub>:  $2.829 \text{ \AA}$ , N3–O7<sub>6</sub>:  $2.998 \text{ \AA}$ , N1–O8:  $2.898 \text{ \AA}$ , N1–O9<sub>5</sub>:  $3.075 \text{ \AA}$ , N4–O4<sub>8</sub>:  $3.182 \text{ \AA}$ , N4–O5<sub>7</sub>:  $3.168 \text{ \AA}$ , N2–O4<sub>5</sub>:  $2.952 \text{ \AA}$ , N2–O2<sub>6</sub>:  $2.999 \text{ \AA}$ , O7–O6<sub>1</sub>:  $3.141 \text{ \AA}$ , O8–O6<sub>3</sub>:  $3.569 \text{ \AA}$ , O10–O1<sub>2</sub>:  $3.432 \text{ \AA}$ , O10–O3<sub>2</sub>:  $3.651 \text{ \AA}$ , N1–O4<sub>5</sub>:  $3.655 \text{ \AA}$ , N2–O3<sub>5</sub>:  $3.232 \text{ \AA}$ , N2–O7<sub>6</sub>:  $3.53 \text{ \AA}$ , N3–O2<sub>6</sub>:  $3.654 \text{ \AA}$ , N4–O1<sub>8</sub>:  $3.66 \text{ \AA}$ , N4–O5<sub>3</sub>:  $3.226 \text{ \AA}$ .

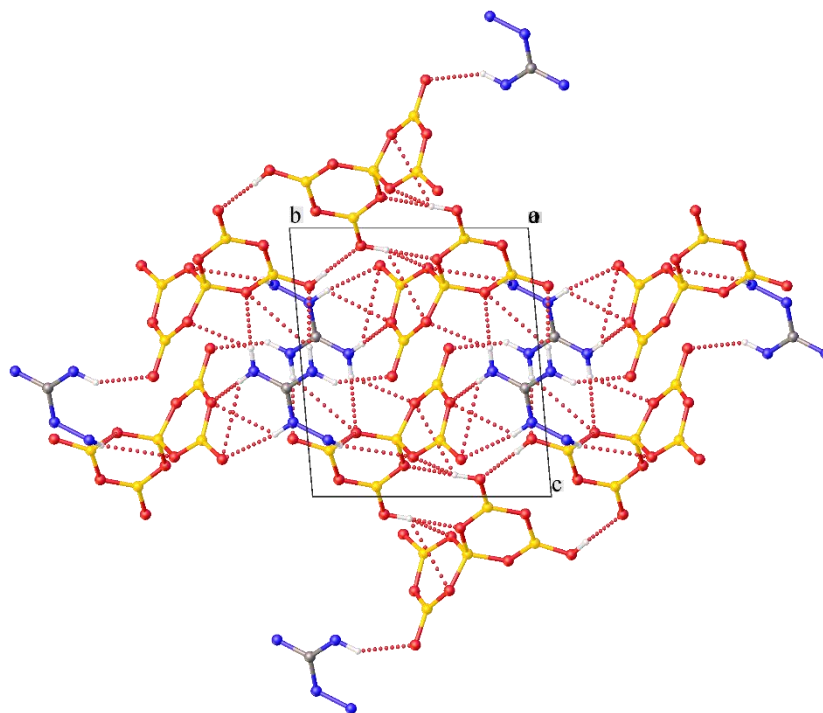

**Figure S3:** Packing diagram of 2019NCS0257.

**Table S8:** Fractional Atomic Coordinates ( $\times 10^4$ ) and Equivalent Isotropic Displacement Parameters ( $\text{\AA}^2 \times 10^3$ ) for 2019NCS0257.  $U_{eq}$  is defined as 1/3 of the trace of the orthogonalised  $U_{ij}$ .

| Atom  | x          | y           | z          | $U_{eq}$ |
|-------|------------|-------------|------------|----------|
| O(1)  | 3911.8(10) | 5658.2(9)   | 8518.1(8)  | 19.3(2)  |
| O(2)  | 4033.6(11) | 3918.3(9)   | 6492.3(8)  | 20.5(2)  |
| O(3)  | 1506.5(10) | 5384.6(9)   | 6512.3(8)  | 18.4(2)  |
| O(4)  | 2664.6(10) | 7954.6(9)   | 7617.0(8)  | 18.6(2)  |
| O(5)  | 971.4(11)  | 8839.7(9)   | 9360.9(8)  | 20.3(2)  |
| O(6)  | 922.7(10)  | 6060.7(9)   | 8836.9(8)  | 18.3(2)  |
| O(7)  | 5900.4(11) | 3658.9(10)  | 8605.8(9)  | 24.2(2)  |
| O(8)  | 1835.2(12) | 3759.9(10)  | 4482.1(8)  | 23.2(2)  |
| O(9)  | 2179.6(12) | 10624.5(10) | 7848.4(9)  | 23.8(2)  |
| O(10) | -582.7(11) | 7072.2(10)  | 10655.0(9) | 23.9(2)  |
| B(1)  | 2255.1(17) | 6274.3(14)  | 7868.9(13) | 17.2(3)  |
| B(2)  | 4621.0(17) | 4446.4(15)  | 7896.7(13) | 19.3(3)  |
| B(3)  | 2429.7(17) | 4376.5(14)  | 5822.2(13) | 18.2(3)  |
| B(4)  | 1931.7(17) | 9133.7(15)  | 8272.1(13) | 18.4(3)  |
| B(5)  | 437.2(17)  | 7289.3(15)  | 9611.7(13) | 18.9(3)  |
| N(1)  | 2239.8(14) | 428.3(12)   | 4662.1(11) | 23.0(2)  |
| N(2)  | 3308.3(15) | -2011.8(12) | 4673.1(12) | 25.4(2)  |
| N(3)  | 3448.4(14) | -553.7(12)  | 2772.0(10) | 21.6(2)  |
| N(4)  | 3110.4(15) | 836.1(12)   | 2115.3(10) | 22.2(2)  |
| C(1)  | 2997.9(15) | -703.7(13)  | 4043.8(12) | 19.6(2)  |

**Table S9:** Anisotropic Displacement Parameters ( $\times 10^4$ ) **2019NCS0257**. The anisotropic displacement factor exponent takes the form:  $-2\pi^2[h^2a^{*2} \times U_{11} + \dots + 2hka^* \times b^* \times U_{12}]$

| Atom  | $U_{11}$ | $U_{22}$ | $U_{33}$ | $U_{23}$ | $U_{13}$ | $U_{12}$ |
|-------|----------|----------|----------|----------|----------|----------|
| O(1)  | 19.7(4)  | 21.6(4)  | 16.2(4)  | -2.4(3)  | -0.4(3)  | 6.9(3)   |
| O(2)  | 21.7(4)  | 23.9(4)  | 16.0(4)  | -2.9(3)  | 0.3(3)   | 10.0(3)  |
| O(3)  | 19.0(4)  | 20.0(4)  | 15.7(4)  | -2.2(3)  | -0.2(3)  | 6.0(3)   |
| O(4)  | 20.9(4)  | 18.6(4)  | 16.9(4)  | -0.4(3)  | 3.8(3)   | 4.8(3)   |
| O(5)  | 24.3(4)  | 17.6(4)  | 20.2(4)  | -1.1(3)  | 6.8(3)   | 5.1(3)   |
| O(6)  | 19.9(4)  | 17.7(4)  | 17.5(4)  | -0.6(3)  | 3.2(3)   | 4.6(3)   |
| O(7)  | 26.4(5)  | 28.3(5)  | 17.3(4)  | -5.0(3)  | -3.3(3)  | 13.4(3)  |
| O(8)  | 25.5(5)  | 26.0(4)  | 17.4(4)  | -4.7(3)  | -3.3(3)  | 12.6(3)  |
| O(9)  | 31.9(5)  | 18.6(4)  | 23.8(4)  | 0.4(3)   | 11.8(4)  | 6.6(3)   |
| O(10) | 30.4(5)  | 18.2(4)  | 26.0(4)  | 1.0(3)   | 12.4(4)  | 6.0(3)   |
| B(1)  | 18.9(6)  | 17.9(6)  | 14.5(6)  | -1.0(5)  | 0.7(5)   | 5.1(5)   |
| B(2)  | 18.6(6)  | 21.9(6)  | 16.6(6)  | -1.9(5)  | 1.4(5)   | 3.8(5)   |
| B(3)  | 20.3(6)  | 17.6(6)  | 16.5(6)  | 0.5(5)   | 1.5(5)   | 4.3(5)   |
| B(4)  | 17.5(6)  | 19.9(6)  | 16.9(6)  | -1.2(5)  | 0.0(4)   | 3.2(5)   |
| B(5)  | 17.9(6)  | 20.4(6)  | 18.2(6)  | 0.5(5)   | 0.3(5)   | 5.7(5)   |
| N(1)  | 28.1(6)  | 22.9(5)  | 19.7(5)  | 0.5(4)   | 7.0(4)   | 8.1(4)   |
| N(2)  | 34.6(6)  | 24.0(5)  | 21.5(5)  | 2.5(4)   | 11.1(4)  | 11.4(4)  |
| N(3)  | 26.7(5)  | 21.2(5)  | 18.1(5)  | -0.4(4)  | 4.8(4)   | 8.0(4)   |
| N(4)  | 24.7(5)  | 22.4(5)  | 19.3(5)  | 2.0(4)   | 1.3(4)   | 4.8(4)   |
| C(1)  | 16.7(5)  | 21.4(6)  | 19.5(5)  | -1.7(4)  | 1.4(4)   | 2.1(4)   |

**Table S10:** Bond Lengths in Å for **2019NCS0257**.

| Atom | Atom | Length/Å   | Atom  | Atom | Length/Å   |
|------|------|------------|-------|------|------------|
| O(1) | B(1) | 1.4723(14) | O(6)  | B(1) | 1.4689(14) |
| O(1) | B(2) | 1.3554(15) | O(6)  | B(5) | 1.3574(15) |
| O(2) | B(2) | 1.3889(14) | O(7)  | B(2) | 1.3596(16) |
| O(2) | B(3) | 1.3868(15) | O(8)  | B(3) | 1.3532(15) |
| O(3) | B(1) | 1.4678(14) | O(9)  | B(4) | 1.3602(15) |
| O(3) | B(3) | 1.3594(15) | O(10) | B(5) | 1.3605(15) |
| O(4) | B(1) | 1.4722(14) | N(1)  | C(1) | 1.3229(15) |
| O(4) | B(4) | 1.3589(15) | N(2)  | C(1) | 1.3304(16) |
| O(5) | B(4) | 1.3790(15) | N(3)  | N(4) | 1.4092(14) |
| O(5) | B(5) | 1.3827(15) | N(3)  | C(1) | 1.3304(15) |

**Table S11:** Bond Angles in ° for **2019NCS0257**.

| Atom | Atom | Atom | Angle/°    | Atom  | Atom | Atom  | Angle/°    |
|------|------|------|------------|-------|------|-------|------------|
| B(2) | O(1) | B(1) | 122.82(9)  | O(7)  | B(2) | O(2)  | 116.34(10) |
| B(3) | O(2) | B(2) | 118.62(9)  | O(3)  | B(3) | O(2)  | 120.33(10) |
| B(3) | O(3) | B(1) | 123.66(9)  | O(8)  | B(3) | O(2)  | 117.11(10) |
| B(4) | O(4) | B(1) | 122.43(9)  | O(8)  | B(3) | O(3)  | 122.56(11) |
| B(4) | O(5) | B(5) | 119.54(9)  | O(4)  | B(4) | O(5)  | 120.97(10) |
| B(5) | O(6) | B(1) | 122.92(9)  | O(4)  | B(4) | O(9)  | 118.87(10) |
| O(3) | B(1) | O(1) | 110.87(9)  | O(9)  | B(4) | O(5)  | 120.16(10) |
| O(3) | B(1) | O(4) | 107.94(9)  | O(6)  | B(5) | O(5)  | 120.49(10) |
| O(3) | B(1) | O(6) | 109.11(9)  | O(6)  | B(5) | O(10) | 122.61(11) |
| O(4) | B(1) | O(1) | 110.42(9)  | O(10) | B(5) | O(5)  | 116.90(10) |
| O(6) | B(1) | O(1) | 106.87(9)  | C(1)  | N(3) | N(4)  | 118.42(10) |
| O(6) | B(1) | O(4) | 111.65(9)  | N(1)  | C(1) | N(2)  | 120.82(11) |
| O(1) | B(2) | O(2) | 121.08(10) | N(1)  | C(1) | N(3)  | 120.23(11) |
| O(1) | B(2) | O(7) | 122.56(10) | N(3)  | C(1) | N(2)  | 118.95(10) |



**Table S12:** Torsion Angles in ° for **2019NCS0257**.

| Atom | Atom | Atom | Atom  | Angle/°    |
|------|------|------|-------|------------|
| B(1) | O(1) | B(2) | O(2)  | 12.76(17)  |
| B(1) | O(1) | B(2) | O(7)  | -          |
|      |      |      |       | 165.67(11) |
| B(1) | O(3) | B(3) | O(2)  | 11.49(16)  |
| B(1) | O(3) | B(3) | O(8)  | -          |
|      |      |      |       | 169.51(10) |
| B(1) | O(4) | B(4) | O(5)  | 9.53(16)   |
| B(1) | O(4) | B(4) | O(9)  | -          |
|      |      |      |       | 171.32(10) |
| B(1) | O(6) | B(5) | O(5)  | 10.16(16)  |
| B(1) | O(6) | B(5) | O(10) | -          |
|      |      |      |       | 169.95(10) |
| B(2) | O(1) | B(1) | O(3)  | 1.06(14)   |
| B(2) | O(1) | B(1) | O(4)  | -          |
|      |      |      |       | 118.52(11) |
| B(2) | O(1) | B(1) | O(6)  | 119.86(10) |
| B(2) | O(2) | B(3) | O(3)  | 3.18(16)   |
| B(2) | O(2) | B(3) | O(8)  | -          |
|      |      |      |       | 175.87(10) |
| B(3) | O(2) | B(2) | O(1)  | -15.14(16) |
| B(3) | O(2) | B(2) | O(7)  | 163.38(10) |
| B(3) | O(3) | B(1) | O(1)  | -13.17(14) |
| B(3) | O(3) | B(1) | O(4)  | 107.89(11) |
| B(3) | O(3) | B(1) | O(6)  | -          |
|      |      |      |       | 130.61(10) |
| B(4) | O(4) | B(1) | O(1)  | -          |
|      |      |      |       | 115.99(11) |
| B(4) | O(4) | B(1) | O(3)  | 122.68(10) |
| B(4) | O(4) | B(1) | O(6)  | 2.76(14)   |
| B(4) | O(5) | B(5) | O(6)  | 3.04(16)   |
| B(4) | O(5) | B(5) | O(10) | -176.86(9) |
| B(5) | O(5) | B(4) | O(4)  | -12.83(16) |
| B(5) | O(5) | B(4) | O(9)  | 168.03(10) |
| B(5) | O(6) | B(1) | O(1)  | 108.27(11) |
| B(5) | O(6) | B(1) | O(3)  | -          |
|      |      |      |       | 131.80(10) |
| B(5) | O(6) | B(1) | O(4)  | -12.58(14) |
| N(4) | N(3) | C(1) | N(1)  | 0.47(16)   |
| N(4) | N(3) | C(1) | N(2)  | 179.91(10) |

**Table S13:** Hydrogen Fractional Atomic Coordinates ( $\times 10^4$ ) and Equivalent Isotropic Displacement Parameters ( $\text{\AA}^2 \times 10^3$ ) for **2019NCS0257**.  $U_{eq}$  is defined as 1/3 of the trace of the orthogonalised  $U_{ij}$ .

| Atom  | x        | y         | z         | $U_{eq}$ |
|-------|----------|-----------|-----------|----------|
| H(7)  | 6070(30) | 3990(20)  | 9480(20)  | 55(5)    |
| H(8)  | 880(30)  | 4070(20)  | 4150(20)  | 48(5)    |
| H(9)  | 1670(20) | 11280(20) | 8315(17)  | 36(4)    |
| H(10) | -780(30) | 6030(30)  | 10810(20) | 53(5)    |
| H(3)  | 3770(20) | -1340(20) | 2327(17)  | 31(4)    |
| H(1A) | 2190(20) | 1330(20)  | 4253(17)  | 32(4)    |
| H(1B) | 2120(20) | 402(19)   | 5565(18)  | 33(4)    |
| H(2A) | 3990(20) | -2612(19) | 4318(17)  | 32(4)    |
| H(2B) | 3090(20) | -2044(19) | 5531(19)  | 35(4)    |
| H(4A) | 4170(20) | 1322(18)  | 1917(16)  | 29(4)    |
| H(4B) | 2350(20) | 567(17)   | 1319(17)  | 26(4)    |

**Table S14:** Hydrogen Bond information for **2019NCS0257**.

| <b>D</b> | <b>H</b> | <b>A</b>           | <b>d(D-H)/Å</b> | <b>d(H-A)/Å</b> | <b>d(D-A)/Å</b> | <b>D-H-A/deg</b> |
|----------|----------|--------------------|-----------------|-----------------|-----------------|------------------|
| O(7)     | H(7)     | O(1) <sup>1</sup>  | 0.85(2)         | 1.94(2)         | 2.7763(11)      | 167.7(19)        |
| O(8)     | H(8)     | O(3) <sup>2</sup>  | 0.82(2)         | 1.92(2)         | 2.7400(12)      | 173.6(18)        |
| O(9)     | H(9)     | O(10) <sup>3</sup> | 0.851(18)       | 1.979(18)       | 2.8294(12)      | 175.9(16)        |
| O(10)    | H(10)    | O(6) <sup>4</sup>  | 0.91(2)         | 1.83(2)         | 2.7334(11)      | 174.2(18)        |
| N(3)     | H(3)     | O(7) <sup>5</sup>  | 0.851(17)       | 2.164(18)       | 2.9978(13)      | 166.6(14)        |
| N(1)     | H(1A)    | O(8)               | 0.887(17)       | 2.116(17)       | 2.8984(14)      | 146.7(14)        |
| N(1)     | H(1B)    | O(9) <sup>6</sup>  | 0.890(17)       | 2.192(18)       | 3.0752(13)      | 171.4(14)        |
| N(2)     | H(2A)    | O(2) <sup>5</sup>  | 0.851(17)       | 2.152(18)       | 2.9988(13)      | 173.4(15)        |
| N(2)     | H(2B)    | O(4) <sup>6</sup>  | 0.868(18)       | 2.084(18)       | 2.9522(13)      | 177.6(16)        |
| N(4)     | H(4A)    | O(4) <sup>7</sup>  | 0.906(17)       | 2.348(17)       | 3.1816(13)      | 153.0(13)        |
| N(4)     | H(4B)    | O(5) <sup>8</sup>  | 0.887(16)       | 2.345(16)       | 3.1676(13)      | 154.3(13)        |

-----  
<sup>1</sup>1-x,1-y,2-z; <sup>2</sup>-x,1-y,1-z; <sup>3</sup>-x,2-y,2-z; <sup>4</sup>-x,1-y,2-z; <sup>5</sup>1-x,-y,1-z; <sup>6</sup>+x,-1+y,+z; <sup>7</sup>1-x,1-y,1-z; <sup>8</sup>+x,-1+y,-1+z

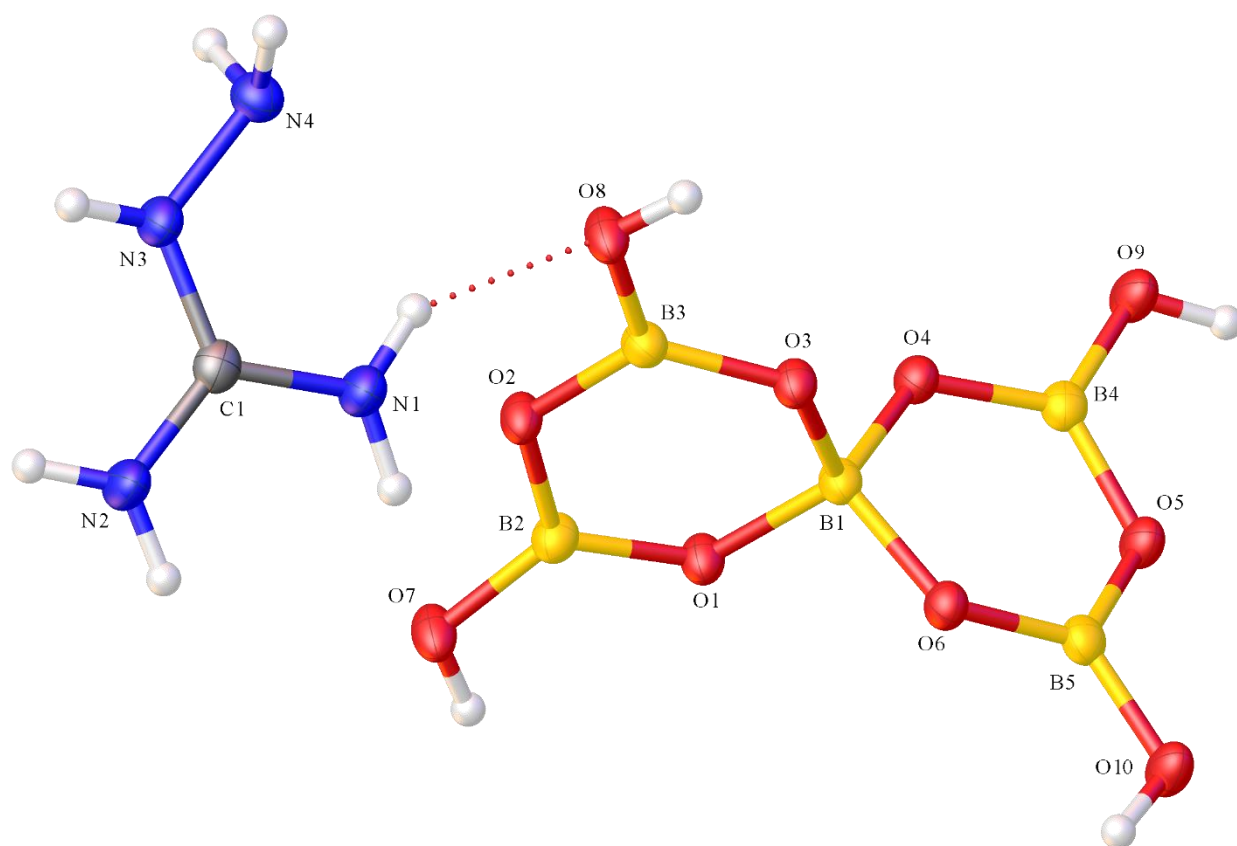

## Citations

CrysAlisPro Software System, Rigaku Oxford Diffraction, (2019).

O.V. Dolomanov and L.J. Bourhis and R.J. Gildea and J.A.K. Howard and H. Puschmann, Olex2: A complete structure solution, refinement and analysis program, *J. Appl. Cryst.*, (2009), **42**, 339-341.

Sheldrick, G.M., Crystal structure refinement with ShelXL, *Acta Cryst.*, (2015), **C27**, 3-8.

Sheldrick, G.M., ShelXT-Integrated space-group and crystal-structure determination, *Acta Cryst.*, (2015), **A71**, 3-8.

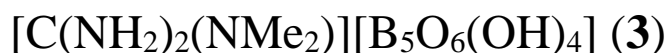

Submitted by: **Mike A Beckett / Tom Rixon**

Bangor University

Solved by: **Peter N Horton**

Sample ID: **MAB/TR/Me2Gaun B5**

## Crystal Data and Experimental

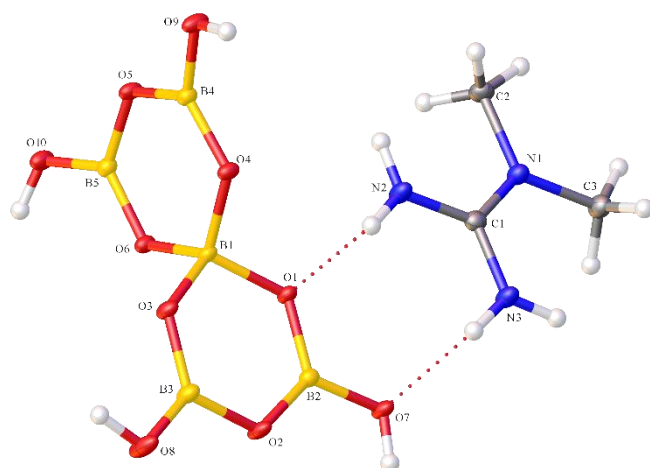

11.6174(3) Å,  $\beta = 96.084(2)^\circ$ ,  $\alpha = \gamma = 90^\circ$ ,  $V = 1297.03(5) \text{ Å}^3$ ,  $T = 100(2) \text{ K}$ ,  $Z = 4$ ,  $Z' = 1$ ,  $\mu(\text{MoK}\alpha) = 0.142 \text{ mm}^{-1}$ , 18168 reflections measured, 2969 unique ( $R_{\text{int}} = 0.0191$ ) which were used in all calculations. The final  $wR_2$  was 0.0811 (all data) and  $R_1$  was 0.0280 ( $I > 2(I)$ ).

**Experimental.** Single colourless plate-shaped crystals of **2019ncs0334** were recrystallised. A suitable crystal  $0.280 \times 0.150 \times 0.030 \text{ mm}^3$  was selected and mounted on a MITIGEN holder in perfluoroether oil on a Rigaku FRE+ equipped with VHF Varimax confocal mirrors and an AFC12 goniometer and HyPix 6000 detector diffractometer. The crystal was kept at a steady  $T = 100(2) \text{ K}$  during data collection. The structure was solved with the **ShelXT** (Sheldrick, 2015) structure solution program using the Intrinsic Phasing solution method and by using **Olex2** (Dolomanov et al., 2009) as the graphical interface. The model was refined with version 2018/3 of **ShelXL** (Sheldrick, 2015) using Least Squares minimisation.

**Crystal Data.**  $\text{C}_3\text{H}_{14}\text{B}_5\text{N}_3\text{O}_{10}$ ,  $M_r = 306.22$ , monoclinic,  $P2_1/c$  (No. 14),  $a = 9.9747(2) \text{ Å}$ ,  $b = 11.2563(3) \text{ Å}$ ,  $c =$

| Compound                          | 2019ncs0334                                                                  |
|-----------------------------------|------------------------------------------------------------------------------|
| Formula                           | C <sub>3</sub> H <sub>14</sub> B <sub>5</sub> N <sub>3</sub> O <sub>10</sub> |
| $D_{calc.}/\text{g cm}^{-3}$      | 1.568                                                                        |
| $\mu/\text{mm}^{-1}$              | 0.142                                                                        |
| Formula Weight                    | 306.22                                                                       |
| Colour                            | colourless                                                                   |
| Shape                             | plate                                                                        |
| Size/mm <sup>3</sup>              | 0.280×0.150×0.030                                                            |
| $T/\text{K}$                      | 100(2)                                                                       |
| Crystal System                    | monoclinic                                                                   |
| Space Group                       | $P2_1/c$                                                                     |
| $a/\text{\AA}$                    | 9.9747(2)                                                                    |
| $b/\text{\AA}$                    | 11.2563(3)                                                                   |
| $c/\text{\AA}$                    | 11.6174(3)                                                                   |
| $\alpha/^\circ$                   | 90                                                                           |
| $\beta/^\circ$                    | 96.084(2)                                                                    |
| $\gamma/^\circ$                   | 90                                                                           |
| $V/\text{\AA}^3$                  | 1297.03(5)                                                                   |
| $Z$                               | 4                                                                            |
| $Z'$                              | 1                                                                            |
| Wavelength/ $\text{\AA}$          | 0.71075                                                                      |
| Radiation type                    | MoK $\alpha$                                                                 |
| $\theta_{min}/^\circ$             | 2.526                                                                        |
| $\theta_{max}/^\circ$             | 27.483                                                                       |
| Measured Refl.                    | 18168                                                                        |
| Independent Refl.                 | 2969                                                                         |
| Reflections with $I > 2\sigma(I)$ | 2722                                                                         |
| $R_{int}$                         | 0.0191                                                                       |
| Parameters                        | 224                                                                          |
| Restraints                        | 0                                                                            |
| Largest Peak                      | 0.268                                                                        |
| Deepest Hole                      | -0.227                                                                       |
| GooF                              | 1.035                                                                        |
| $wR_2$ (all data)                 | 0.0811                                                                       |
| $wR_2$                            | 0.0793                                                                       |
| $R_1$ (all data)                  | 0.0306                                                                       |
| $R_1$                             | 0.0280                                                                       |

## Structure Quality Indicators

|              |            |       |             |      |          |       |                         |       |
|--------------|------------|-------|-------------|------|----------|-------|-------------------------|-------|
| Reflections: | d min (Mo) | 0.77  | I/ $\sigma$ | 81.3 | Rint     | 1.91% | complete<br>100% (IUCr) | 100%  |
| Refinement:  | Shift      | 0.000 | Max Peak    | 0.3  | Min Peak | -0.2  | Goof                    | 1.035 |

A colourless plate-shaped crystal with dimensions 0.280×0.150×0.030 mm<sup>3</sup> was mounted on a MITIGEN holder in perfluoroether oil. Data were collected using a Rigaku FRE+ equipped with VHF Varimax confocal mirrors and an AFC12 goniometer and HyPix 6000 detector diffractometer equipped with an Oxford Cryosystems low-temperature device operating at  $T = 100(2)$  K.

Data were measured using profile data from  $\omega$ -scans 0.5° per frame for 2.0 s using MoK $\alpha$  radiation (Rotating Anode, 45.0 kV, 55.0 mA). The total number of runs and images was based on the strategy calculation from the program **CrysAlisPro** (Rigaku, V1.171.40.45a, 2019). The maximum resolution that was achieved was  $\Theta = 27.483^\circ$  (0.77 Å).

The diffraction pattern was indexed. The total number of runs and images was based on the strategy calculation from the program **CrysAlisPro** (Rigaku, V1.171.40.45a, 2019) and the unit cell was refined using **CrysAlisPro** (Rigaku, V1.171.40.45a, 2019) on 10774 reflections, 59% of the observed reflections.

Data reduction, scaling and absorption corrections were performed using **CrysAlisPro** (Rigaku, V1.171.40.45a, 2019). The final completeness is 99.90 % out to 27.483° in  $\Theta$ . A multi-scan absorption correction was performed using CrysAlisPro 1.171.40.45a (Rigaku Oxford Diffraction, 2019) using spherical harmonics as implemented in SCALE3 ABSPACK. The absorption coefficient  $\mu$  of this material is 0.142 mm<sup>-1</sup> at this wavelength ( $\lambda = 0.71075$  Å) and the minimum and maximum transmissions are 0.643 and 1.000.

The structure was solved and the space group  $P2_1/c$  (# 14) determined by the **ShelXT** (Sheldrick, 2015) structure solution program using Intrinsic Phasing and refined by Least Squares using version 2018/3 of **ShelXL** (Sheldrick, 2015). All non-hydrogen atoms were refined anisotropically. Most hydrogen atom positions were calculated geometrically and refined using the riding model, but some hydrogen atoms were refined freely.

*\_exptl\_absorpt\_process\_details*: CrysAlisPro 1.171.40.45a (Rigaku Oxford Diffraction, 2019) using spherical harmonics as implemented in SCALE3 ABSPACK.

There is a single molecule in the asymmetric unit, which is represented by the reported sum formula. In other words: Z is 4 and Z' is 1.

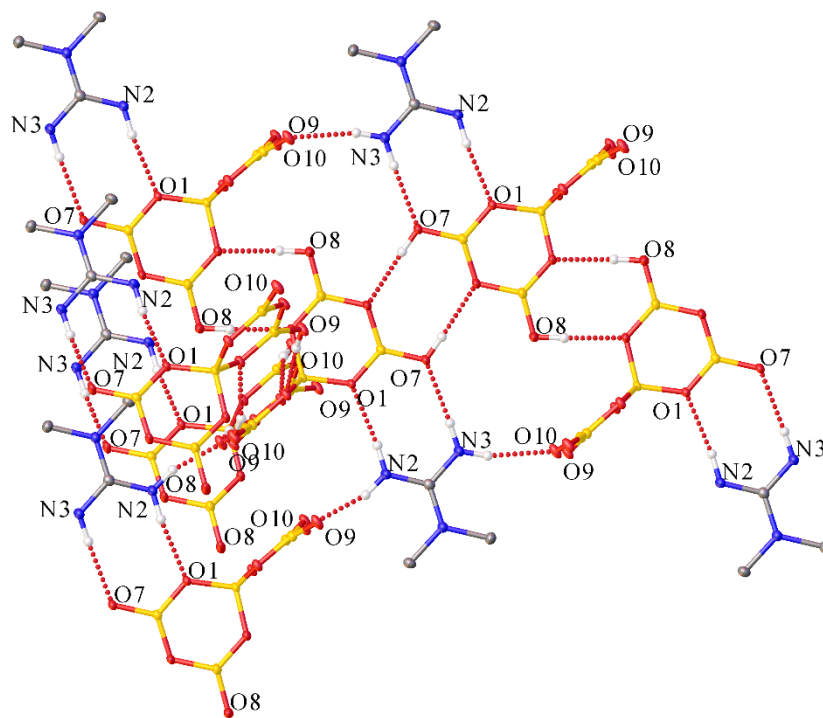

**Figure S4:** The following hydrogen bonding interactions with a maximum D-D distance of 3.04 Å and a minimum angle of 120 ° are present in **2019ncs0334**: O7–O2\_1: 2.759 Å, O8–O3\_2: 2.735 Å, O9–O6\_3: 2.791 Å, O10–O4\_4: 2.857 Å, N2–O1: 2.898 Å, N2–O10\_5: 2.919 Å, N3–O7: 2.97 Å, N3–O9\_6: 3.017 Å.

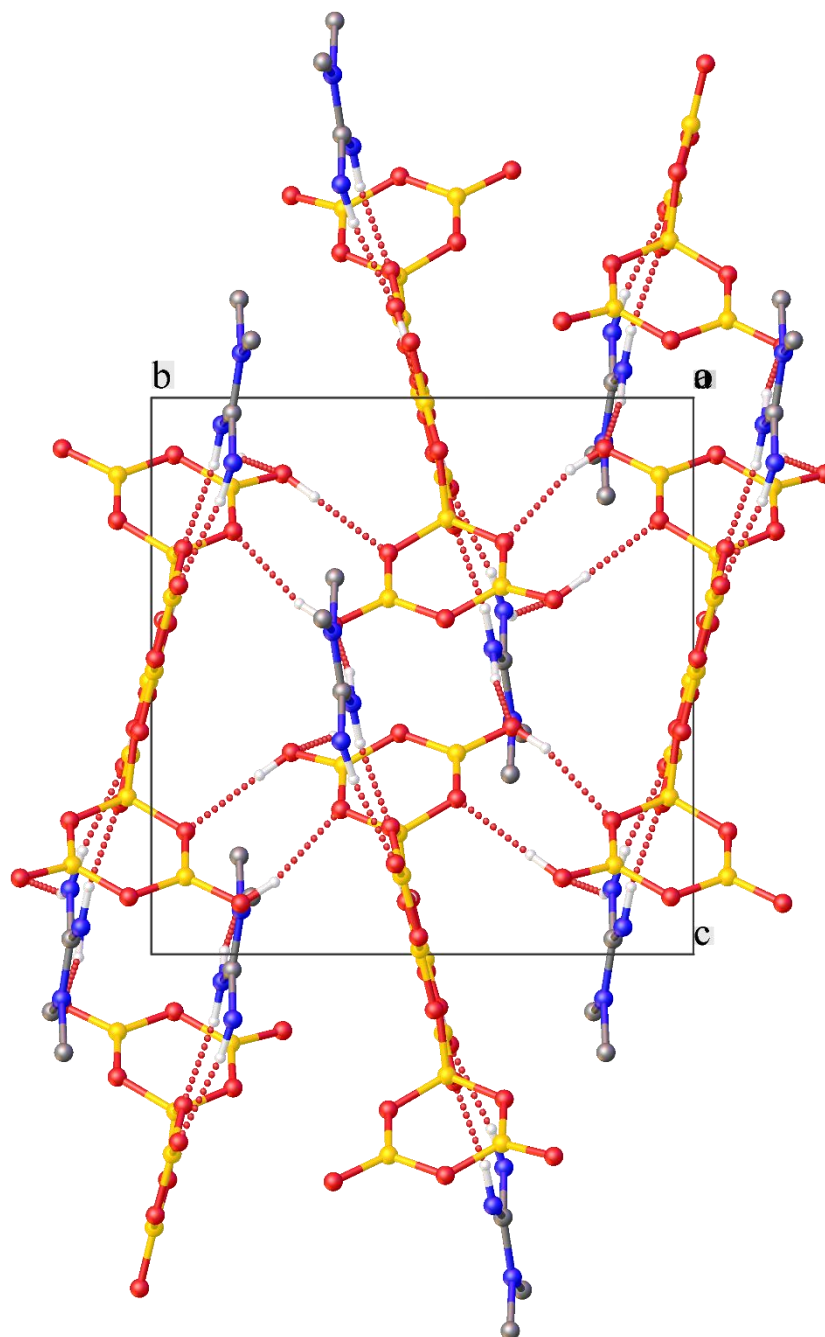

**Figure S5:** Packing diagram of 2019ncs0334.



**Table S15:** Fractional Atomic Coordinates ( $\times 10^4$ ) and Equivalent Isotropic Displacement Parameters ( $\text{\AA}^2 \times 10^3$ ) for **2019ncs0334**.  $U_{eq}$  is defined as  $1/3$  of the trace of the orthogonalised  $U_{ij}$ .

| Atom  | x          | y          | z          | $U_{eq}$  |
|-------|------------|------------|------------|-----------|
| O(1)  | 2668.8(6)  | 5588.7(6)  | 7711.1(5)  | 10.55(14) |
| O(2)  | 3336.6(6)  | 5072.4(7)  | 9685.8(5)  | 15.08(16) |
| O(3)  | 1003.4(6)  | 5298.6(6)  | 9048.9(5)  | 12.43(15) |
| O(4)  | 492.2(6)   | 6506.3(6)  | 7398.1(5)  | 11.63(14) |
| O(5)  | -996.5(6)  | 5419.6(6)  | 6030.2(6)  | 13.16(15) |
| O(6)  | 726.3(6)   | 4369.3(6)  | 7204.6(5)  | 11.60(15) |
| O(7)  | 4948.5(7)  | 5500.9(6)  | 8372.8(6)  | 13.91(15) |
| O(8)  | 1742.0(7)  | 4781.8(8)  | 10997.5(6) | 22.00(18) |
| O(9)  | -1427.0(7) | 7420.9(6)  | 6371.5(6)  | 15.74(16) |
| O(10) | -904.5(7)  | 3353.8(6)  | 5915.8(6)  | 15.68(16) |
| B(1)  | 1227.3(10) | 5447.2(9)  | 7825.0(8)  | 10.11(19) |
| B(2)  | 3639.9(10) | 5381.7(9)  | 8585.6(9)  | 10.81(19) |
| B(3)  | 1983.9(10) | 5050.2(10) | 9906.1(9)  | 13.8(2)   |
| B(4)  | -609.6(10) | 6462.1(9)  | 6604.5(9)  | 11.9(2)   |
| B(5)  | -356.4(10) | 4374.3(9)  | 6392.5(9)  | 11.6(2)   |
| N(1)  | 5049.5(8)  | 6656.9(7)  | 4200.9(7)  | 13.68(17) |
| N(2)  | 3479.1(8)  | 6301.3(8)  | 5489.9(7)  | 15.67(18) |
| N(3)  | 5716.3(8)  | 6501.8(8)  | 6169.9(7)  | 15.72(18) |
| C(1)  | 4746.8(9)  | 6485.7(8)  | 5276.9(8)  | 12.45(18) |
| C(2)  | 3979.2(9)  | 6617.5(9)  | 3236.5(8)  | 15.07(19) |
| C(3)  | 6452.1(9)  | 6841.5(9)  | 3970.0(8)  | 15.89(19) |

**Table S16:** Anisotropic Displacement Parameters ( $\times 10^4$ ) **2019ncs0334**. The anisotropic displacement factor exponent takes the form:  $-2\pi^2 [h^2 a^{*2} \times U_{11} + \dots + 2hka^* \times b^* \times U_{12}]$

| Atom  | $U_{11}$ | $U_{22}$ | $U_{33}$ | $U_{23}$ | $U_{13}$ | $U_{12}$ |
|-------|----------|----------|----------|----------|----------|----------|
| O(1)  | 7.5(3)   | 14.4(3)  | 9.3(3)   | 1.0(2)   | -0.8(2)  | -0.6(2)  |
| O(2)  | 7.2(3)   | 27.2(4)  | 10.4(3)  | 4.2(3)   | -0.8(2)  | 0.8(3)   |
| O(3)  | 7.2(3)   | 19.6(3)  | 10.3(3)  | 1.6(2)   | -0.2(2)  | 0.7(2)   |
| O(4)  | 9.9(3)   | 10.8(3)  | 13.2(3)  | -0.2(2)  | -3.2(2)  | 0.4(2)   |
| O(5)  | 11.9(3)  | 12.2(3)  | 13.9(3)  | 0.1(2)   | -5.3(2)  | 0.1(2)   |
| O(6)  | 9.7(3)   | 10.5(3)  | 13.6(3)  | 0.5(2)   | -3.2(2)  | -0.3(2)  |
| O(7)  | 7.7(3)   | 22.8(4)  | 10.8(3)  | 3.5(3)   | -1.1(2)  | 0.1(2)   |
| O(8)  | 9.2(3)   | 44.6(5)  | 12.0(3)  | 7.0(3)   | 0.2(2)   | 1.0(3)   |
| O(9)  | 13.3(3)  | 12.4(3)  | 19.6(3)  | -1.4(3)  | -6.9(3)  | 1.7(2)   |
| O(10) | 14.4(3)  | 11.9(3)  | 19.0(3)  | 0.6(3)   | -6.4(3)  | -1.0(2)  |
| B(1)  | 7.5(4)   | 12.2(5)  | 10.1(4)  | 0.7(3)   | -1.4(3)  | -0.4(3)  |
| B(2)  | 9.6(4)   | 11.4(4)  | 11.0(4)  | 0.3(3)   | -0.5(3)  | 0.0(3)   |
| B(3)  | 8.9(4)   | 19.9(5)  | 12.2(4)  | 1.3(4)   | -0.3(3)  | 0.7(4)   |
| B(4)  | 9.7(4)   | 13.6(5)  | 11.9(4)  | 1.4(4)   | -0.8(3)  | -0.6(4)  |
| B(5)  | 9.4(4)   | 13.5(5)  | 11.6(4)  | 0.7(4)   | -0.1(3)  | -0.9(3)  |
| N(1)  | 10.8(4)  | 18.0(4)  | 12.0(4)  | 1.6(3)   | 0.1(3)   | -0.6(3)  |
| N(2)  | 10.9(4)  | 24.6(4)  | 11.1(4)  | 2.6(3)   | -0.6(3)  | -2.0(3)  |
| N(3)  | 10.8(4)  | 24.0(4)  | 11.9(4)  | 2.5(3)   | -0.7(3)  | -1.3(3)  |
| C(1)  | 13.0(4)  | 11.2(4)  | 12.9(4)  | 0.1(3)   | 0.0(3)   | 0.6(3)   |
| C(2)  | 15.0(4)  | 18.4(5)  | 11.2(4)  | 1.3(3)   | -1.5(3)  | 0.4(3)   |
| C(3)  | 11.9(4)  | 21.1(5)  | 14.9(4)  | 2.1(4)   | 2.6(3)   | -0.1(3)  |

**Table S17:** Bond Lengths in Å for **2019ncs0334**.

| Atom | Atom | Length/Å   | Atom  | Atom | Length/Å   |
|------|------|------------|-------|------|------------|
| O(1) | B(1) | 1.4665(11) | O(6)  | B(5) | 1.3566(12) |
| O(1) | B(2) | 1.3476(12) | O(7)  | B(2) | 1.3606(12) |
| O(2) | B(2) | 1.3887(12) | O(8)  | B(3) | 1.3498(12) |
| O(2) | B(3) | 1.4000(12) | O(9)  | B(4) | 1.3623(12) |
| O(3) | B(1) | 1.4721(11) | O(10) | B(5) | 1.3642(12) |
| O(3) | B(3) | 1.3490(12) | N(1)  | C(1) | 1.3307(12) |
| O(4) | B(1) | 1.4586(11) | N(1)  | C(2) | 1.4641(11) |
| O(4) | B(4) | 1.3586(11) | N(1)  | C(3) | 1.4670(11) |
| O(5) | B(4) | 1.3843(12) | N(2)  | C(1) | 1.3303(12) |
| O(5) | B(5) | 1.3828(12) | N(3)  | C(1) | 1.3413(12) |
| O(6) | B(1) | 1.4715(11) |       |      |            |

**Table S18:** Bond Angles in ° for **2019ncs0334**.

| Atom | Atom | Atom | Angle/°   | Atom  | Atom | Atom  | Angle/°   |
|------|------|------|-----------|-------|------|-------|-----------|
| B(2) | O(1) | B(1) | 123.13(7) | O(3)  | B(3) | O(2)  | 119.91(8) |
| B(2) | O(2) | B(3) | 118.75(7) | O(3)  | B(3) | O(8)  | 123.51(9) |
| B(3) | O(3) | B(1) | 124.35(7) | O(8)  | B(3) | O(2)  | 116.58(8) |
| B(4) | O(4) | B(1) | 122.83(7) | O(4)  | B(4) | O(5)  | 121.48(8) |
| B(5) | O(5) | B(4) | 118.58(7) | O(4)  | B(4) | O(9)  | 122.00(9) |
| B(5) | O(6) | B(1) | 122.76(7) | O(9)  | B(4) | O(5)  | 116.45(8) |
| O(1) | B(1) | O(3) | 110.50(7) | O(6)  | B(5) | O(5)  | 121.54(8) |
| O(1) | B(1) | O(6) | 109.31(7) | O(6)  | B(5) | O(10) | 122.28(8) |
| O(4) | B(1) | O(1) | 110.06(7) | O(10) | B(5) | O(5)  | 116.14(8) |
| O(4) | B(1) | O(3) | 107.40(7) | C(1)  | N(1) | C(2)  | 119.66(8) |
| O(4) | B(1) | O(6) | 112.02(7) | C(1)  | N(1) | C(3)  | 120.54(8) |
| O(6) | B(1) | O(3) | 107.51(7) | C(2)  | N(1) | C(3)  | 119.77(7) |
| O(1) | B(2) | O(2) | 121.86(8) | N(1)  | C(1) | N(3)  | 120.52(8) |
| O(1) | B(2) | O(7) | 118.21(8) | N(2)  | C(1) | N(1)  | 120.81(8) |
| O(7) | B(2) | O(2) | 119.92(8) | N(2)  | C(1) | N(3)  | 118.67(8) |

**Table S19:** Torsion Angles in ° for **2019ncs0334**.

| Atom | Atom | Atom | Atom  | Angle/°    |
|------|------|------|-------|------------|
| B(1) | O(1) | B(2) | O(2)  | -3.25(13)  |
| B(1) | O(1) | B(2) | O(7)  | 177.74(8)  |
| B(1) | O(3) | B(3) | O(2)  | 8.45(14)   |
| B(1) | O(3) | B(3) | O(8)  | -172.06(9) |
| B(1) | O(4) | B(4) | O(5)  | -9.06(13)  |
| B(1) | O(4) | B(4) | O(9)  | 167.75(8)  |
| B(1) | O(6) | B(5) | O(5)  | 5.20(13)   |
| B(1) | O(6) | B(5) | O(10) | -172.52(8) |
| B(2) | O(1) | B(1) | O(3)  | 11.53(12)  |
| B(2) | O(1) | B(1) | O(4)  | 129.98(8)  |
| B(2) | O(1) | B(1) | O(6)  | -106.59(9) |
| B(2) | O(2) | B(3) | O(3)  | 1.60(14)   |
| B(2) | O(2) | B(3) | O(8)  | -177.94(9) |
| B(3) | O(2) | B(2) | O(1)  | -4.13(14)  |
| B(3) | O(2) | B(2) | O(7)  | 174.85(9)  |

| Atom | Atom | Atom | Atom  | Angle/°    |
|------|------|------|-------|------------|
| B(3) | O(3) | B(1) | O(1)  | -14.28(12) |
| B(3) | O(3) | B(1) | O(4)  | -134.34(9) |
| B(3) | O(3) | B(1) | O(6)  | 104.94(9)  |
| B(4) | O(4) | B(1) | O(1)  | 128.12(8)  |
| B(4) | O(4) | B(1) | O(3)  | -111.55(9) |
| B(4) | O(4) | B(1) | O(6)  | 6.29(11)   |
| B(4) | O(5) | B(5) | O(6)  | -7.18(13)  |
| B(4) | O(5) | B(5) | O(10) | 170.67(8)  |
| B(5) | O(5) | B(4) | O(4)  | 9.08(13)   |
| B(5) | O(5) | B(4) | O(9)  | -167.89(8) |
| B(5) | O(6) | B(1) | O(1)  | -126.65(8) |
| B(5) | O(6) | B(1) | O(3)  | 113.38(9)  |
| B(5) | O(6) | B(1) | O(4)  | -4.39(11)  |
| C(2) | N(1) | C(1) | N(2)  | -1.28(13)  |
| C(2) | N(1) | C(1) | N(3)  | 179.06(9)  |
| C(3) | N(1) | C(1) | N(2)  | -179.06(9) |
| C(3) | N(1) | C(1) | N(3)  | 1.28(14)   |

**Table S20:** Hydrogen Fractional Atomic Coordinates ( $\times 10^4$ ) and Equivalent Isotropic Displacement Parameters ( $\text{\AA}^2 \times 10^3$ ) for **2019ncs0334**.  $U_{eq}$  is defined as 1/3 of the trace of the orthogonalised  $U_{ij}$ .

| Atom  | x         | y        | z         | $U_{eq}$ |
|-------|-----------|----------|-----------|----------|
| H(2C) | 3537.54   | 5839.08  | 3218.18   | 23       |
| H(2D) | 4368.9    | 6747.54  | 2507.08   | 23       |
| H(2E) | 3314.8    | 7239.67  | 3338.68   | 23       |
| H(3C) | 6781.43   | 7595.92  | 4313.32   | 24       |
| H(3D) | 6500.38   | 6862.83  | 3132.11   | 24       |
| H(3E) | 7011.52   | 6188.94  | 4310.36   | 24       |
| H(2A) | 3291(13)  | 6153(12) | 6208(12)  | 21(3)    |
| H(2B) | 2820(15)  | 6349(13) | 4943(13)  | 27(3)    |
| H(9)  | -1174(16) | 8004(15) | 6783(14)  | 37(4)    |
| H(3A) | 6556(16)  | 6645(14) | 6087(12)  | 31(4)    |
| H(8)  | 842(19)   | 4790(15) | 11009(14) | 43(4)    |
| H(3B) | 5512(13)  | 6270(13) | 6857(12)  | 22(3)    |
| H(10) | -624(16)  | 2731(15) | 6298(14)  | 39(4)    |
| H(7)  | 5490(18)  | 5311(14) | 8952(15)  | 40(4)    |

**Table S21:** Hydrogen Bond information for **2019ncs0334**.

| D     | H     | A                  | d(D-H)/\AA | d(H-A)/\AA | d(D-A)/\AA | D-H-A/deg |
|-------|-------|--------------------|------------|------------|------------|-----------|
| N(2)  | H(2A) | O(1)               | 0.890(14)  | 2.017(14)  | 2.8978(10) | 170.2(13) |
| N(2)  | H(2B) | O(10) <sup>1</sup> | 0.866(15)  | 2.087(15)  | 2.9195(10) | 161.1(13) |
| O(9)  | H(9)  | O(6) <sup>2</sup>  | 0.835(17)  | 1.958(17)  | 2.7911(10) | 175.3(16) |
| N(3)  | H(3A) | O(9) <sup>3</sup>  | 0.869(16)  | 2.186(16)  | 3.0171(11) | 160.1(13) |
| O(8)  | H(8)  | O(3) <sup>4</sup>  | 0.899(19)  | 1.837(19)  | 2.7347(10) | 175.3(16) |
| N(3)  | H(3B) | O(7)               | 0.884(14)  | 2.091(14)  | 2.9700(10) | 172.2(13) |
| O(10) | H(10) | O(4) <sup>5</sup>  | 0.861(17)  | 2.042(17)  | 2.8566(9)  | 157.5(15) |
| O(7)  | H(7)  | O(2) <sup>6</sup>  | 0.845(18)  | 1.915(18)  | 2.7589(9)  | 177.1(17) |

----  
<sup>1</sup>-x,1-y,1-z; <sup>2</sup>-x,1/2+y,3/2-z; <sup>3</sup>1+x,y,z; <sup>4</sup>-x,1-y,2-z; <sup>5</sup>-x,-1/2+y,3/2-z; <sup>6</sup>1-x,1-y,2-z

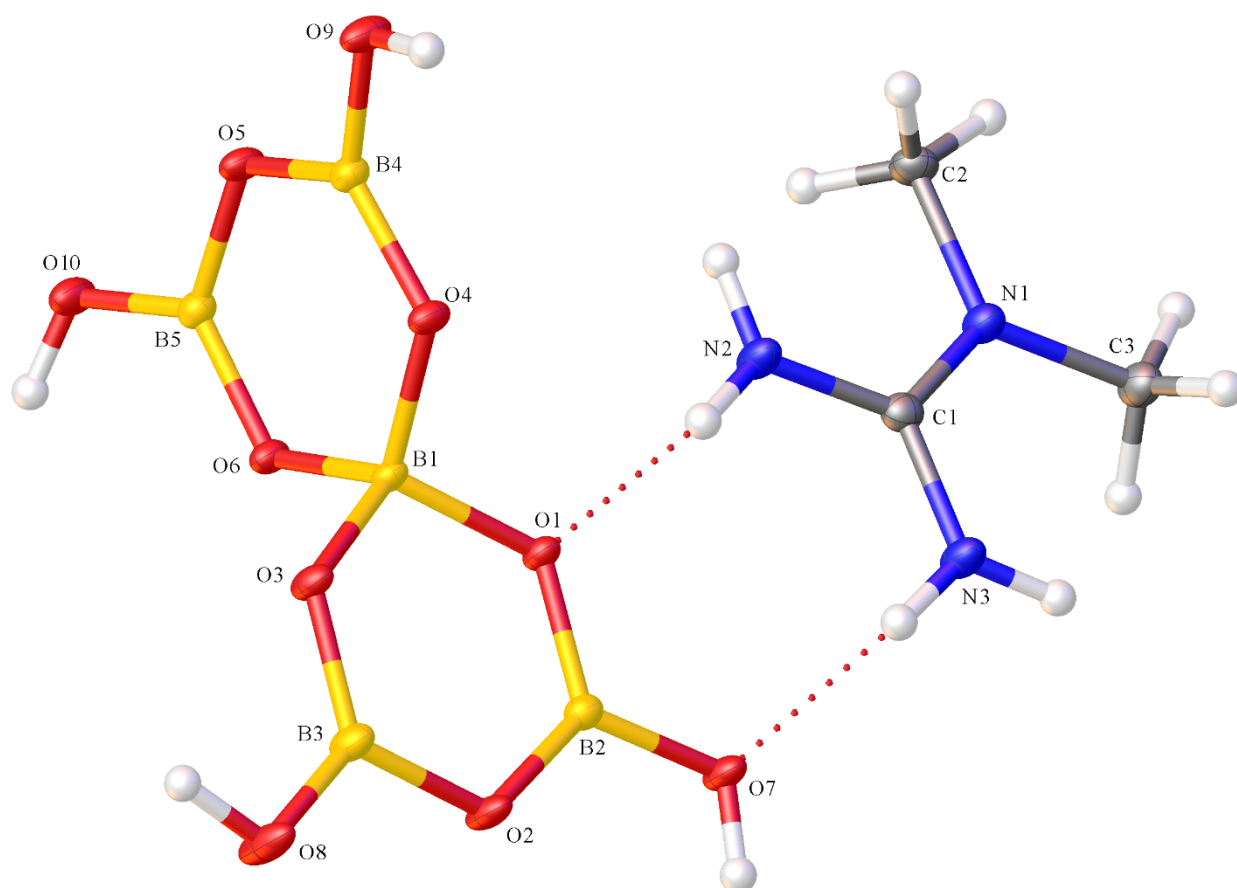

## Citations

CrysAlisPro Software System, Rigaku Oxford Diffraction, (2019).

O.V. Dolomanov and L.J. Bourhis and R.J. Gildea and J.A.K. Howard and H. Puschmann, Olex2: A complete structure solution, refinement and analysis program, *J. Appl. Cryst.*, (2009), **42**, 339-341.

Sheldrick, G.M., Crystal structure refinement with ShelXL, *Acta Cryst.*, (2015), **C27**, 3-8.

Sheldrick, G.M., ShelXT-Integrated space-group and crystal-structure determination, *Acta Cryst.*, (2015), **A71**, 3-8.

Submitted by: **Mike A Beckett**  
Bangor University

Solved by: **Peter N Horton**

Sample ID: **MAB/JM/1**

$R_1=3.73\%$

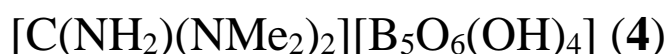

## Crystal Data and Experimental

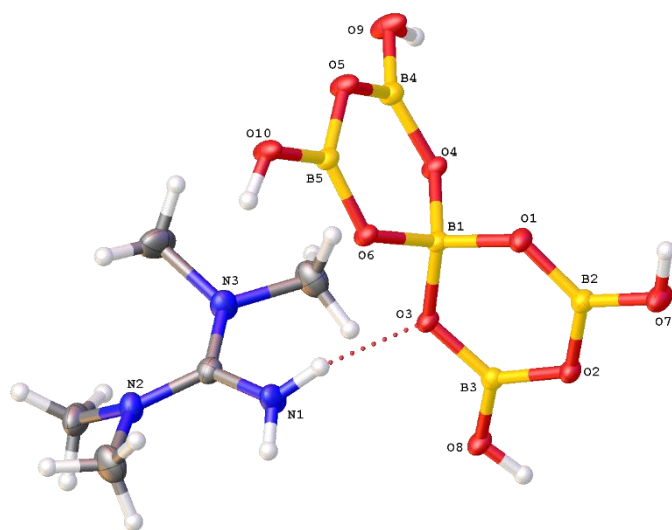

**Experimental.** Single colourless block-shaped crystals of **2011src0322** were used as supplied. A suitable crystal with dimensions  $0.36 \times 0.20 \times 0.14 \text{ mm}^3$  was selected and mounted on a Bruker-Nonius Roper CCD camera on  $\kappa$ -goniostat diffractometer. The crystal was kept at a steady  $T = 120(2) \text{ K}$  during data collection. The structure was solved with the **ShelXS-97** (Sheldrick, 2008) solution program using direct methods and by using **Olex2** 1.5 (Dolomanov et al., 2009) as the graphical interface. The model was refined with **ShelXL** 2018/3 (Sheldrick, 2015) using full matrix least squares minimisation on  $F^2$ .

**Crystal Data.**  $\text{C}_5\text{H}_{18}\text{B}_5\text{N}_3\text{O}_{10}$ ,  $M_r = 334.27$ , triclinic,  $P-1$  (No. 2),  $a = 9.5035(3)$  Å,  $b = 9.5151(3)$  Å,  $c = 10.4386(3)$  Å,  $\alpha = 65.3810(10)^\circ$ ,  $\beta = 69.049(2)^\circ$ ,  $\gamma = 88.603(2)^\circ$ ,  $V = 792.72(4)$  Å<sup>3</sup>,  $T = 120(2)$  K,  $Z = 2$ ,  $Z' = 1$ ,  $\mu(\text{MoK}\alpha) = 0.123$  mm<sup>-1</sup>, 16517 reflections measured, 3638 unique ( $R_{\text{int}} = 0.0406$ ) which were used in all calculations. The final  $wR_2$  was 0.0935 (all data) and  $R_I$  was 0.0373 ( $I \geq 2 \sigma(I)$ ).

| Compound                     | 2011src0322                                                                  |
|------------------------------|------------------------------------------------------------------------------|
| Formula                      | C <sub>5</sub> H <sub>18</sub> B <sub>5</sub> N <sub>3</sub> O <sub>10</sub> |
| $D_{calc.}/\text{g cm}^{-3}$ | 1.400                                                                        |
| $\mu/\text{mm}^{-1}$         | 0.123                                                                        |
| Formula Weight               | 334.27                                                                       |
| Colour                       | colourless                                                                   |
| Shape                        | block-shaped                                                                 |
| Size/ $\text{mm}^3$          | 0.36×0.20×0.14                                                               |
| $T/\text{K}$                 | 120(2)                                                                       |
| Crystal System               | triclinic                                                                    |
| Space Group                  | $P\bar{1}$                                                                   |
| $a/\text{\AA}$               | 9.5035(3)                                                                    |
| $b/\text{\AA}$               | 9.5151(3)                                                                    |
| $c/\text{\AA}$               | 10.4386(3)                                                                   |
| $\alpha/^\circ$              | 65.3810(10)                                                                  |
| $\beta/^\circ$               | 69.049(2)                                                                    |
| $\gamma/^\circ$              | 88.603(2)                                                                    |
| $V/\text{\AA}^3$             | 792.72(4)                                                                    |
| $Z$                          | 2                                                                            |
| $Z'$                         | 1                                                                            |
| Wavelength/ $\text{\AA}$     | 0.71073                                                                      |
| Radiation type               | MoK $_{\alpha}$                                                              |
| $\Theta_{min}/^\circ$        | 3.071                                                                        |
| $\Theta_{max}/^\circ$        | 27.575                                                                       |
| Measured Refl's.             | 16517                                                                        |
| Indep't Refl's               | 3638                                                                         |
| Refl's $I \geq 2 \sigma(I)$  | 2972                                                                         |
| $R_{int}$                    | 0.0406                                                                       |
| Parameters                   | 231                                                                          |
| Restraints                   | 0                                                                            |
| Largest Peak                 | 0.197                                                                        |
| Deepest Hole                 | -0.238                                                                       |
| GooF                         | 1.057                                                                        |
| $wR_2$ (all data)            | 0.0935                                                                       |
| $wR_2$                       | 0.0873                                                                       |
| $R_1$ (all data)             | 0.0493                                                                       |
| $R_1$                        | 0.0373                                                                       |

## Structure Quality Indicators

|              |                   |       |                 |      |          |       |              |       |
|--------------|-------------------|-------|-----------------|------|----------|-------|--------------|-------|
| Reflections: | d min (Mo)        | 0.77  | I/ $\sigma$ (I) | 26.5 | Rint     | 4.06% | Full 50.5°   | 99.7  |
|              | 2 $\Theta$ =55.1° |       |                 |      | m=4.52   |       | 99% to 55.1° |       |
| Refinement:  | Shift             | 0.000 | Max Peak        | 0.2  | Min Peak | -0.2  | GooF         | 1.057 |
|              |                   |       |                 |      |          |       |              |       |

A colourless block-shaped crystal with dimensions  $0.36 \times 0.20 \times 0.14 \text{ mm}^3$  was mounted. Data were collected using a Bruker-Nonius Roper CCD camera on  $\kappa$ -goniostat diffractometer operating at  $T = 120(2) \text{ K}$ .

Data were measured using  $\phi$  &  $\omega$  scans with  $\text{MoK}\alpha$  radiation. The diffraction pattern was indexed and the total number of runs and images was based on the strategy calculation from the program COLLECT (Hooft, R.W.W., 1998). The maximum resolution that was achieved was  $\Theta = 27.575^\circ$  ( $0.77 \text{ \AA}$ ).

The unit cell was refined using DENZO (Otwinowski & Minor, 1997) & COLLECT (Hooft, R.W.W., 1998) on 3558 reflections, 22% of the observed reflections.

Data reduction, scaling and absorption corrections were performed using DENZO (Otwinowski & Minor, 1997) & COLLECT (Hooft, R.W.W., 1998). The final completeness is 99.70 % out to  $27.575^\circ$  in  $\Theta$  SADABS 2007/2 (Sheldrick, G.M., 2007). The absorption coefficient  $\mu$  of this material is  $0.123 \text{ mm}^{-1}$  at this wavelength ( $\lambda = 0.71073 \text{ \AA}$ ) and the minimum and maximum transmissions are 0.957 and 0.983.

The structure was solved and the space group  $P-1$  (# 2) determined by the ShelXS-97 (Sheldrick, 2008) structure solution program using direct methods and refined by full matrix least squares minimisation on  $F^2$  using version 2018/3 of ShelXL (Sheldrick, 2015). All non-hydrogen atoms were refined anisotropically. Most hydrogen atom positions were calculated geometrically and refined using the riding model, but some hydrogen atoms were refined freely.

*\_exptl\_absorpt\_process\_details*: SADABS 2007/2 (Sheldrick, G.M., 2007)

There is a single molecule in the asymmetric unit, which is represented by the reported sum formula. In other words: Z is 2 and Z' is 1.

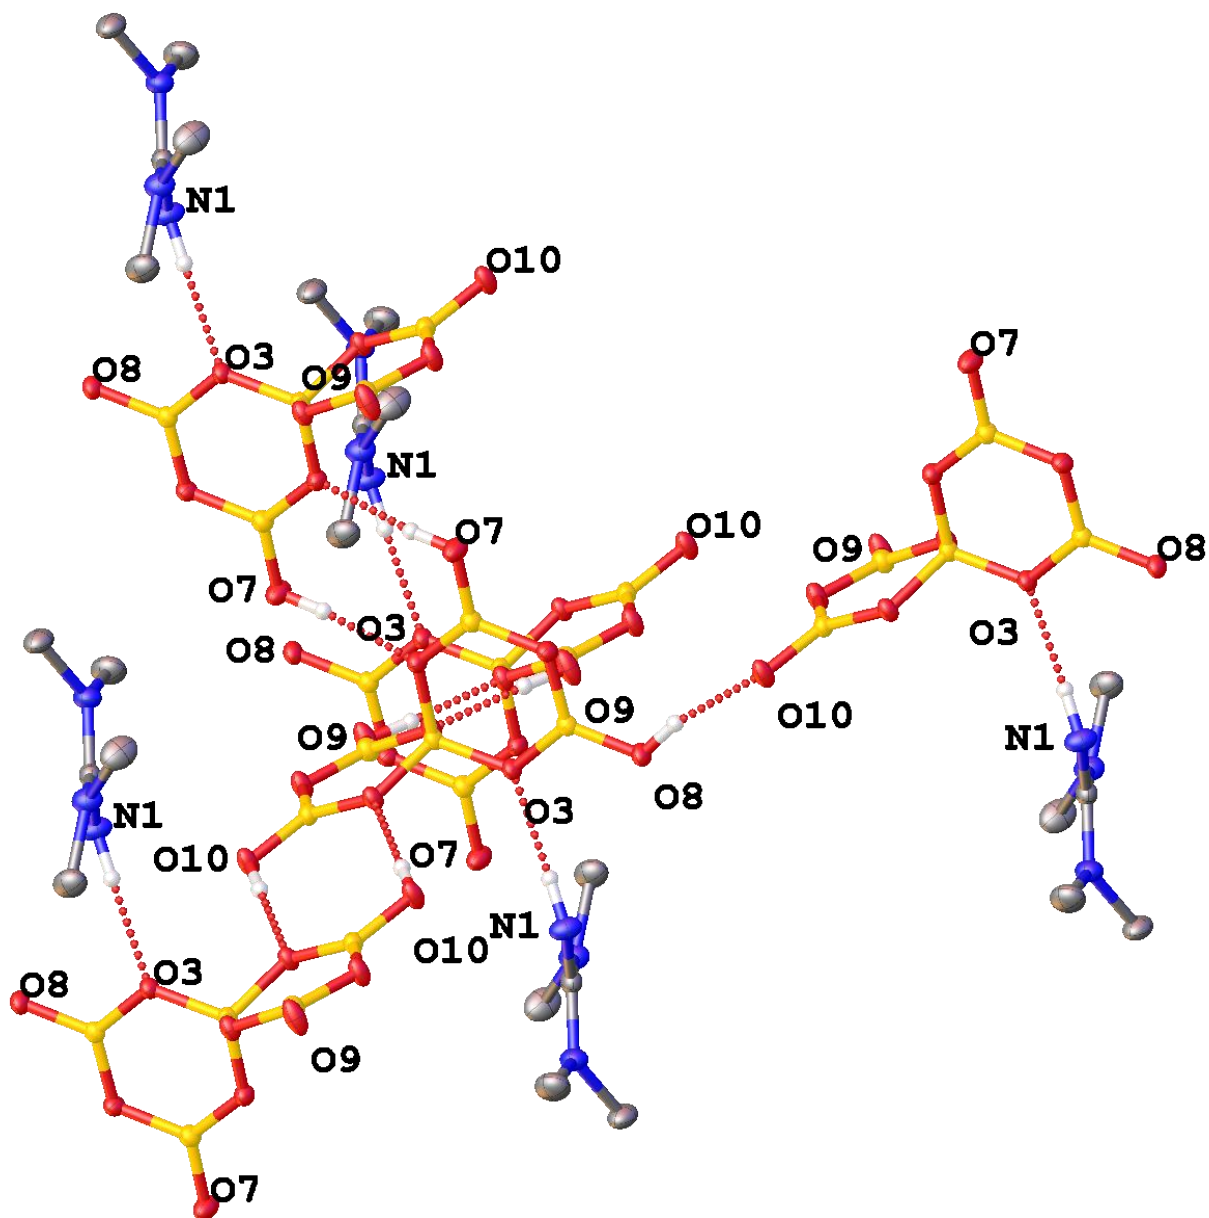

**Figure S6:** The following hydrogen bonding interactions with a maximum D-D distance of 2.9 Å and a minimum angle of 120 ° are present in **2011src0322**: O7-O1\_1: 2.765 Å, O8-O10\_2: 2.735 Å, O9-O4\_3: 2.706 Å, O10-O6\_4: 2.695 Å, N1-O2\_5: 3.062 Å, N1-O3: 2.827 Å.

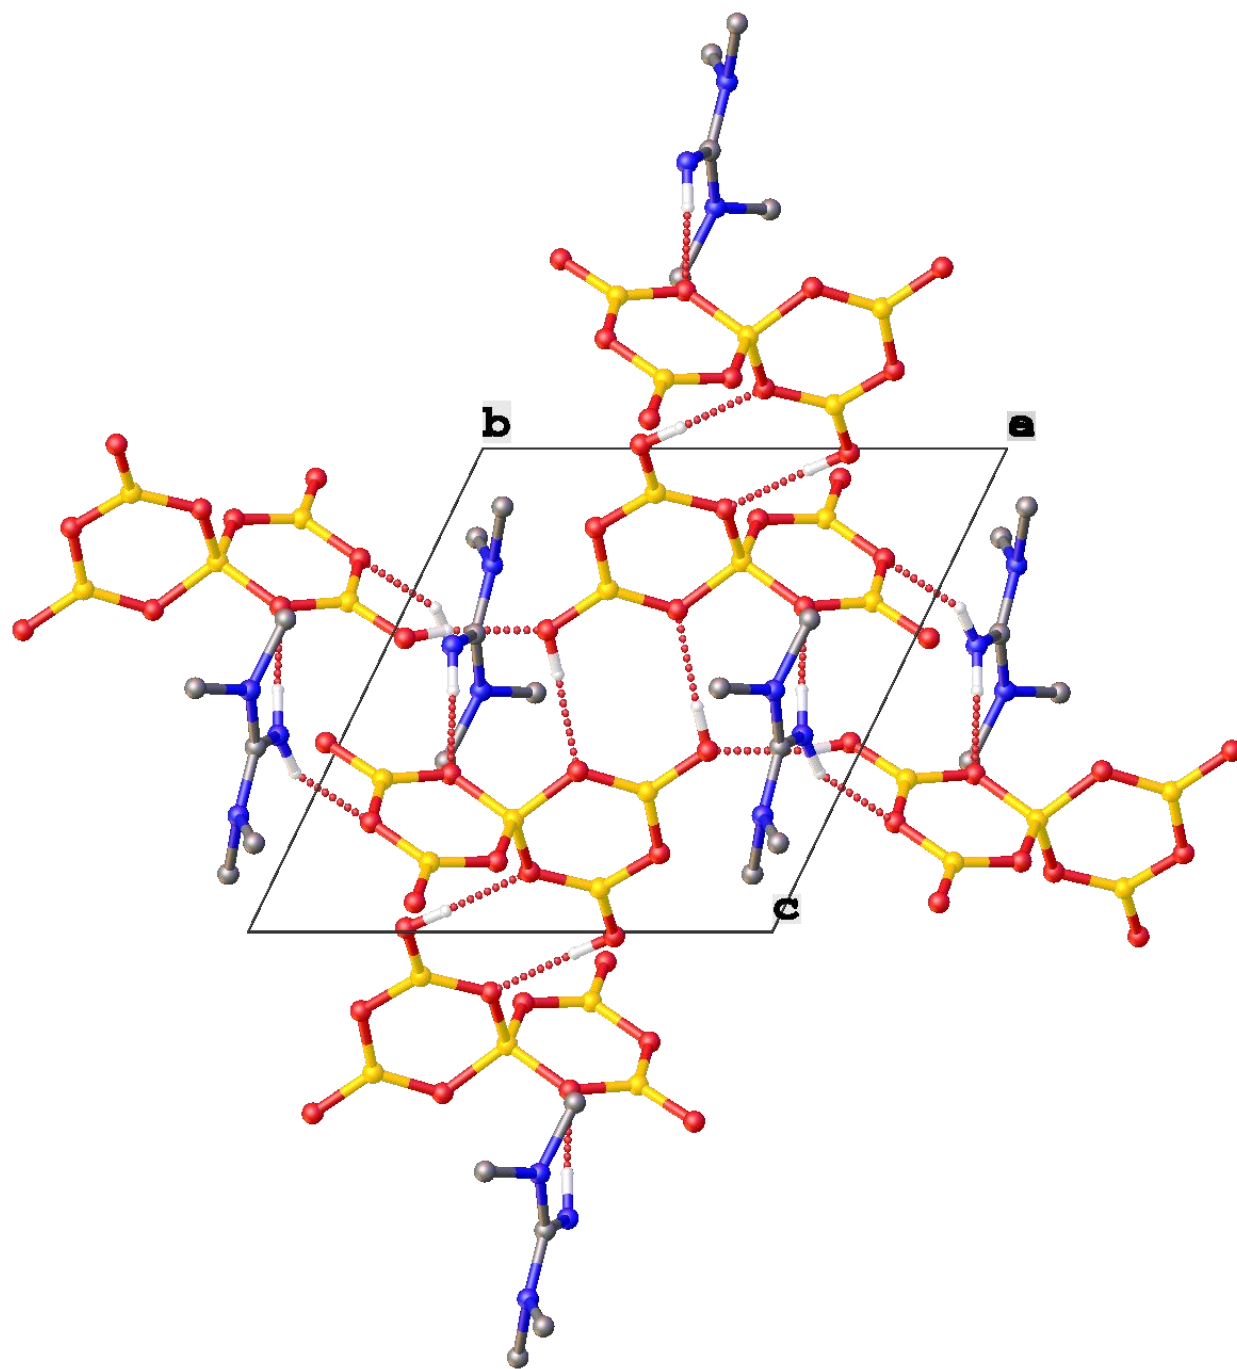

**Figure S7:** Packing diagram of 2011src0322.



**Table S22:** Fractional Atomic Coordinates ( $\times 10^4$ ) and Equivalent Isotropic Displacement Parameters ( $\text{\AA}^2 \times 10^3$ ) for **2011src0322**.  $U_{eq}$  is defined as  $1/3$  of the trace of the orthogonalised  $U_{ij}$ .

| Atom | x           | y           | z           | $U_{eq}$ |
|------|-------------|-------------|-------------|----------|
| B1   | 3360.3(16)  | 5984.1(15)  | 7668.0(16)  | 13.6(3)  |
| B2   | 4894.0(16)  | 7187.8(16)  | 8561.2(16)  | 16.0(3)  |
| B3   | 3785.7(15)  | 8851.5(16)  | 6839.0(16)  | 13.7(3)  |
| B4   | 1294.0(16)  | 3700.8(16)  | 9092.9(17)  | 16.9(3)  |
| B5   | 3507.2(16)  | 3689.1(16)  | 7091.4(16)  | 14.8(3)  |
| O1   | 4313.3(10)  | 5910.5(9)   | 8536.2(10)  | 16.4(2)  |
| O2   | 4636.2(10)  | 8675.7(10)  | 7724.6(10)  | 16.3(2)  |
| O3   | 3270.4(10)  | 7600.5(9)   | 6729.6(10)  | 14.7(2)  |
| O4   | 1810.4(10)  | 5184.5(10)  | 8753.4(10)  | 15.9(2)  |
| O5   | 2213.9(10)  | 2882.7(10)  | 8369.5(10)  | 18.7(2)  |
| O6   | 4014.0(9)   | 5201.2(9)   | 6668.9(10)  | 15.2(2)  |
| O7   | 5748.5(11)  | 7096.5(11)  | 9384.6(12)  | 24.4(2)  |
| O8   | 3428.9(10)  | 10266.4(10) | 6079.8(10)  | 17.4(2)  |
| O9   | -130.4(11)  | 2976.3(11)  | 10087.3(11) | 25.4(2)  |
| O10  | 4212.4(11)  | 2912.3(10)  | 6248.9(11)  | 19.3(2)  |
| C1   | 1392.4(14)  | 8431.0(14)  | 3827.0(15)  | 17.5(3)  |
| C2   | 3052.1(18)  | 9084(2)     | 1203.1(17)  | 32.6(4)  |
| C3   | 320.6(17)   | 9288.4(17)  | 1841.3(17)  | 27.4(3)  |
| C4   | -222.0(17)  | 7816.1(19)  | 6469.7(17)  | 29.9(3)  |
| C5   | -1077.9(18) | 6736.0(18)  | 5048.2(19)  | 34.0(4)  |
| N1   | 2598.5(13)  | 8753.3(15)  | 4074.0(15)  | 23.0(3)  |
| N2   | 1537.2(13)  | 8738.5(13)  | 2408.1(13)  | 21.4(3)  |
| N3   | 48.6(13)    | 7794.6(14)  | 5005.7(13)  | 22.5(3)  |

**Table S23:** Anisotropic Displacement Parameters ( $\times 10^4$ ) for **2011src0322**. The anisotropic displacement factor exponent takes the form:  $-2\pi^2[h^2a^{*2} \times U_{11} + \dots + 2hka^* \times b^* \times U_{12}]$

| Atom | $U_{11}$ | $U_{22}$ | $U_{33}$ | $U_{23}$ | $U_{13}$ | $U_{12}$ |
|------|----------|----------|----------|----------|----------|----------|
| B1   | 15.1(7)  | 11.3(6)  | 13.9(7)  | -5.6(5)  | -4.9(5)  | 1.0(5)   |
| B2   | 16.8(7)  | 15.1(7)  | 16.9(7)  | -7.4(6)  | -6.6(6)  | 1.3(5)   |
| B3   | 12.5(6)  | 14.3(6)  | 14.1(7)  | -6.9(5)  | -3.9(5)  | 1.2(5)   |
| B4   | 18.2(7)  | 14.5(7)  | 16.7(7)  | -7.2(6)  | -4.9(6)  | 0.6(5)   |
| B5   | 16.5(7)  | 12.0(6)  | 16.7(7)  | -6.4(5)  | -7.1(6)  | 2.0(5)   |
| O1   | 21.2(5)  | 12.5(4)  | 18.8(5)  | -7.1(4)  | -10.9(4) | 2.9(3)   |
| O2   | 20.8(5)  | 13.5(4)  | 18.0(5)  | -7.3(4)  | -10.4(4) | 1.4(3)   |
| O3   | 17.8(4)  | 11.4(4)  | 17.3(5)  | -6.8(4)  | -8.6(4)  | 1.5(3)   |
| O4   | 15.7(4)  | 13.0(4)  | 17.6(5)  | -8.5(4)  | -2.7(4)  | -0.1(3)  |
| O5   | 18.7(5)  | 13.3(4)  | 20.1(5)  | -9.1(4)  | -0.6(4)  | -1.3(4)  |
| O6   | 16.6(4)  | 12.4(4)  | 15.4(4)  | -7.4(4)  | -2.9(4)  | -0.5(3)  |
| O7   | 34.3(6)  | 15.6(5)  | 29.8(6)  | -7.2(4)  | -22.7(5) | 2.2(4)   |
| O8   | 21.7(5)  | 12.4(4)  | 22.5(5)  | -8.8(4)  | -12.0(4) | 2.9(4)   |
| O9   | 20.5(5)  | 18.2(5)  | 29.6(6)  | -14.7(4) | 4.6(4)   | -3.7(4)  |
| O10  | 21.4(5)  | 13.2(4)  | 17.8(5)  | -8.2(4)  | 0.3(4)   | -1.6(4)  |
| C1   | 18.1(6)  | 16.4(6)  | 20.7(7)  | -9.2(5)  | -9.2(5)  | 4.6(5)   |
| C2   | 32.1(8)  | 42.6(9)  | 22.8(8)  | -16.5(7) | -7.6(7)  | 7.2(7)   |
| C3   | 33.3(8)  | 26.4(7)  | 30.8(8)  | -11.4(6) | -22.6(7) | 4.2(6)   |
| C4   | 25.9(8)  | 39.5(9)  | 22.0(7)  | -13.7(7) | -6.5(6)  | 7.6(6)   |
| C5   | 26.3(8)  | 32.0(8)  | 37.8(9)  | -6.5(7)  | -15.5(7) | -7.3(6)  |
| N1   | 19.4(6)  | 28.8(6)  | 19.2(6)  | -6.7(5)  | -9.8(5)  | -1.9(5)  |
| N2   | 22.9(6)  | 25.4(6)  | 19.9(6)  | -11.3(5) | -10.9(5) | 3.6(5)   |
| N3   | 17.5(6)  | 28.2(6)  | 21.5(6)  | -10.0(5) | -8.1(5)  | 0.7(5)   |

**Table S24:** Bond Lengths in Å for **2011src0322**.

| Atom | Atom | Length/Å   |
|------|------|------------|
| B1   | O1   | 1.4757(16) |
| B1   | O3   | 1.4596(15) |
| B1   | O4   | 1.4748(16) |
| B1   | O6   | 1.4799(15) |
| B2   | O1   | 1.3608(16) |
| B2   | O2   | 1.3904(17) |
| B2   | O7   | 1.3562(17) |
| B3   | O2   | 1.3910(16) |
| B3   | O3   | 1.3607(15) |
| B3   | O8   | 1.3552(16) |
| B4   | O4   | 1.3609(16) |
| B4   | O5   | 1.3875(16) |
| B4   | O9   | 1.3526(17) |
| B5   | O5   | 1.3783(16) |
| B5   | O6   | 1.3600(15) |
| B5   | O10  | 1.3656(16) |
| C1   | N1   | 1.3299(17) |
| C1   | N2   | 1.3392(17) |
| C1   | N3   | 1.3434(17) |
| C2   | N2   | 1.4651(19) |
| C3   | N2   | 1.4706(17) |
| C4   | N3   | 1.4652(18) |
| C5   | N3   | 1.4642(18) |

**Table S25:** Bond Angles in ° for **2011src0322**.

| Atom | Atom | Atom | Angle/°    |
|------|------|------|------------|
| O1   | B1   | O6   | 109.67(10) |
| O3   | B1   | O1   | 111.07(9)  |
| O3   | B1   | O4   | 108.70(10) |
| O3   | B1   | O6   | 108.97(10) |
| O4   | B1   | O1   | 108.73(10) |
| O4   | B1   | O6   | 109.67(9)  |
| O1   | B2   | O2   | 120.95(11) |
| O7   | B2   | O1   | 122.79(12) |
| O7   | B2   | O2   | 116.27(11) |
| O3   | B3   | O2   | 120.80(11) |
| O8   | B3   | O2   | 121.02(11) |
| O8   | B3   | O3   | 118.17(11) |
| O4   | B4   | O5   | 120.35(11) |
| O9   | B4   | O4   | 122.69(12) |
| O9   | B4   | O5   | 116.91(11) |
| O6   | B5   | O5   | 121.24(11) |
| O6   | B5   | O10  | 122.08(12) |
| O10  | B5   | O5   | 116.63(11) |
| B2   | O1   | B1   | 123.55(10) |
| B2   | O2   | B3   | 119.10(10) |
| B3   | O3   | B1   | 123.82(10) |
| B4   | O4   | B1   | 123.03(10) |
| B5   | O5   | B4   | 118.76(10) |
| B5   | O6   | B1   | 121.96(10) |
| N1   | C1   | N2   | 119.51(12) |
| N1   | C1   | N3   | 119.51(12) |
| N2   | C1   | N3   | 120.98(11) |
| C1   | N2   | C2   | 120.24(11) |
| C1   | N2   | C3   | 122.29(12) |
| C2   | N2   | C3   | 114.07(12) |
| C1   | N3   | C4   | 120.99(11) |
| C1   | N3   | C5   | 122.61(12) |
| C5   | N3   | C4   | 114.85(12) |

**Table S26:** Torsion Angles in ° for **2011src0322**.

| Atom | Atom | Atom | Atom | Angle/°     |
|------|------|------|------|-------------|
| O1   | B1   | O3   | B3   | -10.07(16)  |
| O1   | B1   | O4   | B4   | -100.51(13) |
| O1   | B1   | O6   | B5   | 96.39(12)   |
| O1   | B2   | O2   | B3   | -0.74(18)   |
| O2   | B2   | O1   | B1   | -1.20(19)   |
| O2   | B3   | O3   | B1   | 9.13(18)    |
| O3   | B1   | O1   | B2   | 6.11(16)    |
| O3   | B1   | O4   | B4   | 138.46(11)  |
| O3   | B1   | O6   | B5   | -141.83(11) |
| O3   | B3   | O2   | B2   | -3.10(18)   |
| O4   | B1   | O1   | B2   | -113.46(12) |
| O4   | B1   | O3   | B3   | 109.51(12)  |
| O4   | B1   | O6   | B5   | -22.96(15)  |
| O4   | B4   | O5   | B5   | -13.65(18)  |
| O5   | B4   | O4   | B1   | -2.37(19)   |
| O5   | B5   | O6   | B1   | 9.66(18)    |
| O6   | B1   | O1   | B2   | 126.62(12)  |
| O6   | B1   | O3   | B3   | -131.00(11) |
| O6   | B1   | O4   | B4   | 19.41(16)   |
| O6   | B5   | O5   | B4   | 10.02(18)   |
| O7   | B2   | O1   | B1   | 178.94(12)  |
| O7   | B2   | O2   | B3   | 179.12(11)  |
| O8   | B3   | O2   | B2   | 175.95(11)  |
| O8   | B3   | O3   | B1   | -169.94(11) |
| O9   | B4   | O4   | B1   | -179.85(12) |
| O9   | B4   | O5   | B5   | 163.97(12)  |
| O10  | B5   | O5   | B4   | -167.61(11) |
| O10  | B5   | O6   | B1   | -172.84(11) |
| N1   | C1   | N2   | C2   | 13.89(19)   |
| N1   | C1   | N2   | C3   | -144.09(13) |
| N1   | C1   | N3   | C4   | 15.85(19)   |
| N1   | C1   | N3   | C5   | -149.25(13) |
| N2   | C1   | N3   | C4   | -164.49(13) |
| N2   | C1   | N3   | C5   | 30.42(19)   |
| N3   | C1   | N2   | C2   | -165.77(12) |
| N3   | C1   | N2   | C3   | 36.25(18)   |

**Table S27:** Hydrogen Fractional Atomic Coordinates ( $\times 10^4$ ) and Equivalent Isotropic Displacement Parameters ( $\text{\AA}^2 \times 10^3$ ) for **2011src0322**.  $U_{eq}$  is defined as 1/3 of the trace of the orthogonalised  $U_{ij}$ .

| Atom | x        | y         | z         | $U_{eq}$ |
|------|----------|-----------|-----------|----------|
| H7   | 5770(20) | 6150(20)  | 9960(20)  | 37       |
| H8   | 3703(18) | 11002(19) | 6244(18)  | 26       |
| H9   | -670(20) | 3580(20)  | 10440(20) | 38       |
| H10  | 4865(19) | 3520(20)  | 5340(20)  | 29       |
| H2A  | 3462.83  | 10184.86  | 797.74    | 49       |
| H2B  | 2976.39  | 8881.23   | 381.81    | 49       |
| H2C  | 3730.5   | 8418.65   | 1623.54   | 49       |
| H3A  | -578.01  | 9305.43   | 2669.84   | 41       |
| H3B  | 54.03    | 8581.73   | 1471.08   | 41       |
| H3C  | 674.93   | 10344.37  | 1005.19   | 41       |
| H4A  | 90.96    | 6883.36   | 7112.91   | 45       |
| H4B  | -1308.23 | 7825.86   | 6981.42   | 45       |
| H4C  | 370.34   | 8753.5    | 6293.96   | 45       |
| H5A  | -667.37  | 6552.88   | 4135.02   | 51       |
| H5B  | -2011.17 | 7206.68   | 5079.05   | 51       |
| H5C  | -1309.26 | 5740.02   | 5959.05   | 51       |
| H1A  | 3382(19) | 9425(19)  | 3290(20)  | 28       |
| H1B  | 2615(18) | 8322(19)  | 5010(20)  | 28       |

**Table S28:** Hydrogen Bond information for **2011src0322**.

| D   | H   | A                | d(D-H)/Å  | d(H-A)/Å  | d(D-A)/Å   | D-H-A/deg |
|-----|-----|------------------|-----------|-----------|------------|-----------|
| O7  | H7  | O1 <sup>1</sup>  | 0.851(19) | 1.92(2)   | 2.7647(13) | 173.5(18) |
| O8  | H8  | O10 <sup>2</sup> | 0.854(17) | 1.895(17) | 2.7350(12) | 167.8(15) |
| O9  | H9  | O4 <sup>3</sup>  | 0.86(2)   | 1.84(2)   | 2.7060(13) | 177.9(18) |
| O10 | H10 | O6 <sup>4</sup>  | 0.873(18) | 1.828(18) | 2.6946(13) | 171.1(15) |
| N1  | H1A | O2 <sup>5</sup>  | 0.884(17) | 2.253(17) | 3.0618(15) | 152.0(14) |
| N1  | H1B | O3               | 0.894(18) | 1.959(18) | 2.8274(15) | 163.7(15) |

-----  
<sup>1</sup>1-x,1-y,2-z; <sup>2</sup>+x,1+y,+z; <sup>3</sup>-x,1-y,2-z; <sup>4</sup>1-x,1-y,1-z; <sup>5</sup>1-x,2-y,1-z

## Citations

COLLECT (Hooft, R.W.W., 1998)

O.V. Dolomanov and L.J. Bourhis and R.J. Gildea and J.A.K. Howard and H. Puschmann, Olex2: A complete structure solution, refinement and analysis program, *J. Appl. Cryst.*, (2009), **42**, 339-341.

Sheldrick, G.M., A short history of ShelX, *Acta Cryst.*, (2008), **A64**, 339-341.

Sheldrick, G.M., Crystal structure refinement with ShelXL, *Acta Cryst.*, (2015), **C71**, 3-8.

Z. Otwinowski and W. Minor, Processing of X-ray Diffraction Data Collected in Oscillation Mode, *Methods in Enzymology*, (1997), **276**, 307-326.

Submitted by: **Mike A Beckett / Tom Rixon**

Bangor University

Solved by: **Peter N Horton**Sample ID: **MAB/TR/Me6Gaun B5**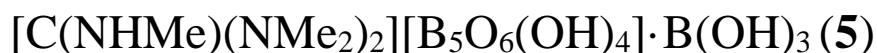

## Crystal Data and Experimental

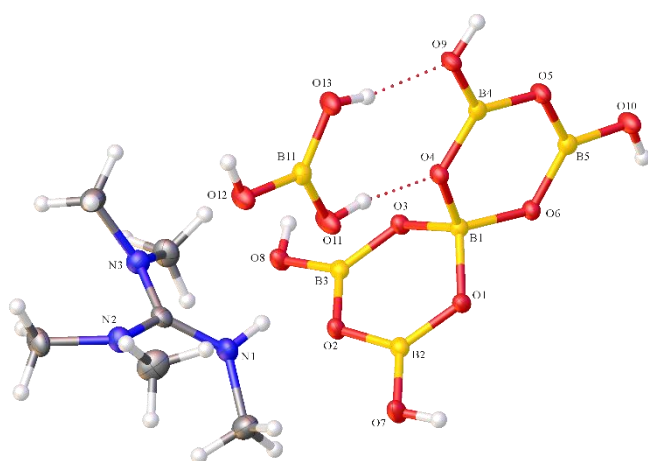

**Experimental.** Single colourless block-shaped crystals of **2019NCS0283** were crystallised. A suitable crystal  $0.220 \times 0.180 \times 0.080 \text{ mm}^3$  was selected and mounted on a MITIGEN holder in perfluoroether oil on a Rigaku 007HF equipped with Varimax confocal mirrors and an AFC11 goniometer and HyPix 6000 detector diffractometer. The crystal was kept at a steady  $T = 100(2) \text{ K}$  during data collection. The structure was solved with the **ShelXT** (Sheldrick, 2015) structure solution program using the dual solution method and by using **Olex2** (Dolomanov et al., 2009) as the graphical interface. The model was refined with version 2018/3 of **ShelXL** (Sheldrick, 2015) using Least Squares minimisation.

**Crystal Data.**  $\text{C}_6\text{H}_{23}\text{B}_6\text{N}_3\text{O}_{13}$ ,  $M_r = 410.13$ , monoclinic,  $P2_1/c$  (No. 14),  $a = 9.49570(10) \text{ \AA}$ ,  $b = 11.44900(10) \text{ \AA}$ ,  $c = 16.84590(10) \text{ \AA}$ ,  $\beta = 98.0710(10)^\circ$ ,  $\alpha = \gamma = 90^\circ$ ,  $V = 1813.28(3) \text{ \AA}^3$ ,  $T = 100(2) \text{ K}$ ,  $Z = 4$ ,  $Z' = 1$ ,  $\mu(\text{CuK}\alpha) = 1.164 \text{ mm}^{-1}$ , 20493 reflections measured, 3281 unique ( $R_{\text{int}} = 0.0196$ ) which were used in all calculations. The final  $wR_2$  was 0.0674 (all data) and  $R_1$  was 0.0263 ( $I > 2(I)$ ).

| Compound                              | 2019NCS0283                                                |
|---------------------------------------|------------------------------------------------------------|
| Formula                               | $\text{C}_6\text{H}_{23}\text{B}_6\text{N}_3\text{O}_{13}$ |
| $D_{\text{calc.}} / \text{g cm}^{-3}$ | 1.502                                                      |
| $\mu / \text{mm}^{-1}$                | 1.164                                                      |
| Formula Weight                        | 410.13                                                     |
| Colour                                | colourless                                                 |
| Shape                                 | block                                                      |
| Size/ $\text{mm}^3$                   | $0.220 \times 0.180 \times 0.080$                          |
| $T / \text{K}$                        | 100(2)                                                     |
| Crystal System                        | monoclinic                                                 |
| Space Group                           | $P2_1/c$                                                   |
| $a / \text{\AA}$                      | 9.49570(10)                                                |
| $b / \text{\AA}$                      | 11.44900(10)                                               |
| $c / \text{\AA}$                      | 16.84590(10)                                               |
| $\alpha / ^\circ$                     | 90                                                         |
| $\beta / ^\circ$                      | 98.0710(10)                                                |
| $\gamma / ^\circ$                     | 90                                                         |
| $V / \text{\AA}^3$                    | 1813.28(3)                                                 |
| $Z$                                   | 4                                                          |
| $Z'$                                  | 1                                                          |
| Wavelength/ $\text{\AA}$              | 1.54178                                                    |
| Radiation type                        | $\text{CuK}\alpha$                                         |
| $\theta_{\text{min}} / ^\circ$        | 4.685                                                      |
| $\theta_{\text{max}} / ^\circ$        | 68.239                                                     |
| Measured Refl.                        | 20493                                                      |
| Independent Refl.                     | 3281                                                       |
| Reflections with $I > 2(I)$           | 3208                                                       |
| $R_{\text{int}}$                      | 0.0196                                                     |
| Parameters                            | 290                                                        |
| Restraints                            | 0                                                          |
| Largest Peak                          | 0.308                                                      |
| Deepest Hole                          | -0.168                                                     |
| GooF                                  | 1.004                                                      |
| $wR_2$ (all data)                     | 0.0674                                                     |
| $wR_2$                                | 0.0670                                                     |
| $R_1$ (all data)                      | 0.0268                                                     |
| $R_1$                                 | 0.0263                                                     |



## Structure Quality Indicators

|              |                 |                  |               |                         |
|--------------|-----------------|------------------|---------------|-------------------------|
| Reflections: | d min (Cu) 0.83 | I/ $\sigma$ 93.0 | Rint 1.96%    | complete 99% (IUCr) 99% |
| Refinement:  | Shift -0.001    | Max Peak 0.3     | Min Peak -0.2 | Goof 1.004              |

A colourless block-shaped crystal with dimensions 0.220×0.180×0.080 mm<sup>3</sup> was mounted on a MITIGEN holder in perfluoroether oil. Data were collected using a Rigaku 007HF equipped with Varimax confocal mirrors and an AFC11 goniometer and HyPix 6000 detector diffractometer equipped with an Oxford Cryosystems low-temperature device operating at  $T = 100(2)$  K.

Data were measured using profile data from  $\omega$ -scans 0.5 ° per frame for 0.5 s using CuK $\alpha$  radiation (Rotating Anode, 40.0 kV, 30.0 mA). The total number of runs and images was based on the strategy calculation from the program **CrysAlisPro** (Rigaku, V1.171.40.45a, 2019). The maximum resolution that was achieved was  $\Theta = 68.239^\circ$  (0.83 Å).

The diffraction pattern was indexed. The total number of runs and images was based on the strategy calculation from the program **CrysAlisPro** (Rigaku, V1.171.40.45a, 2019) and the unit cell was refined using **CrysAlisPro** (Rigaku, V1.171.40.45a, 2019) on 17068 reflections, 83% of the observed reflections.

Data reduction, scaling and absorption corrections were performed using **CrysAlisPro** (Rigaku, V1.171.40.45a, 2019). The final completeness is 98.70 % out to 68.239° in  $\Theta$ . A multi-scan absorption correction was performed using CrysAlisPro 1.171.40.45a (Rigaku Oxford Diffraction, 2019) using spherical harmonics as implemented in SCALE3 ABSPACK. The absorption coefficient  $\mu$  of this material is 1.164 mm<sup>-1</sup> at this wavelength ( $\lambda = 1.54178$  Å) and the minimum and maximum transmissions are 0.804 and 1.000.

The structure was solved and the space group  $P2_1/c$  (# 14) determined by the **ShelXT** (Sheldrick, 2015) structure solution program using dual and refined by Least Squares using version 2018/3 of **ShelXL** (Sheldrick, 2015). All non-hydrogen atoms were refined anisotropically. Most hydrogen atom positions were calculated geometrically and refined using the riding model, but some hydrogen atoms were refined freely.

*\_exptl\_absorpt\_process\_details*: CrysAlisPro 1.171.40.45a (Rigaku Oxford Diffraction, 2019) using spherical harmonics as implemented in SCALE3 ABSPACK.

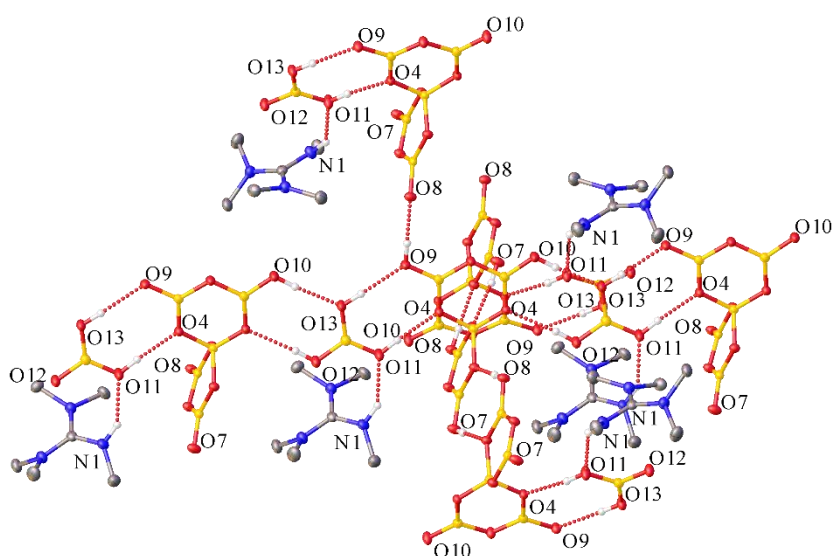

**Figure S8:** The following hydrogen bonding interactions with a maximum D-D distance of 3.22 Å and a minimum angle of 120 ° are present in **2019NCS0283**: N1–O11: 2.928 Å, O7–O3\_4: 2.711 Å, O8–O1\_1: 2.687 Å, O9–O8\_2: 2.742 Å, O10–O13\_3: 2.725 Å, O11–O4: 2.696 Å, O12–O6\_5: 2.828 Å, O13–O9: 2.799 Å.

There is a single molecule in the asymmetric unit, which is represented by the reported sum formula. In other words: Z is 4 and Z' is 1.

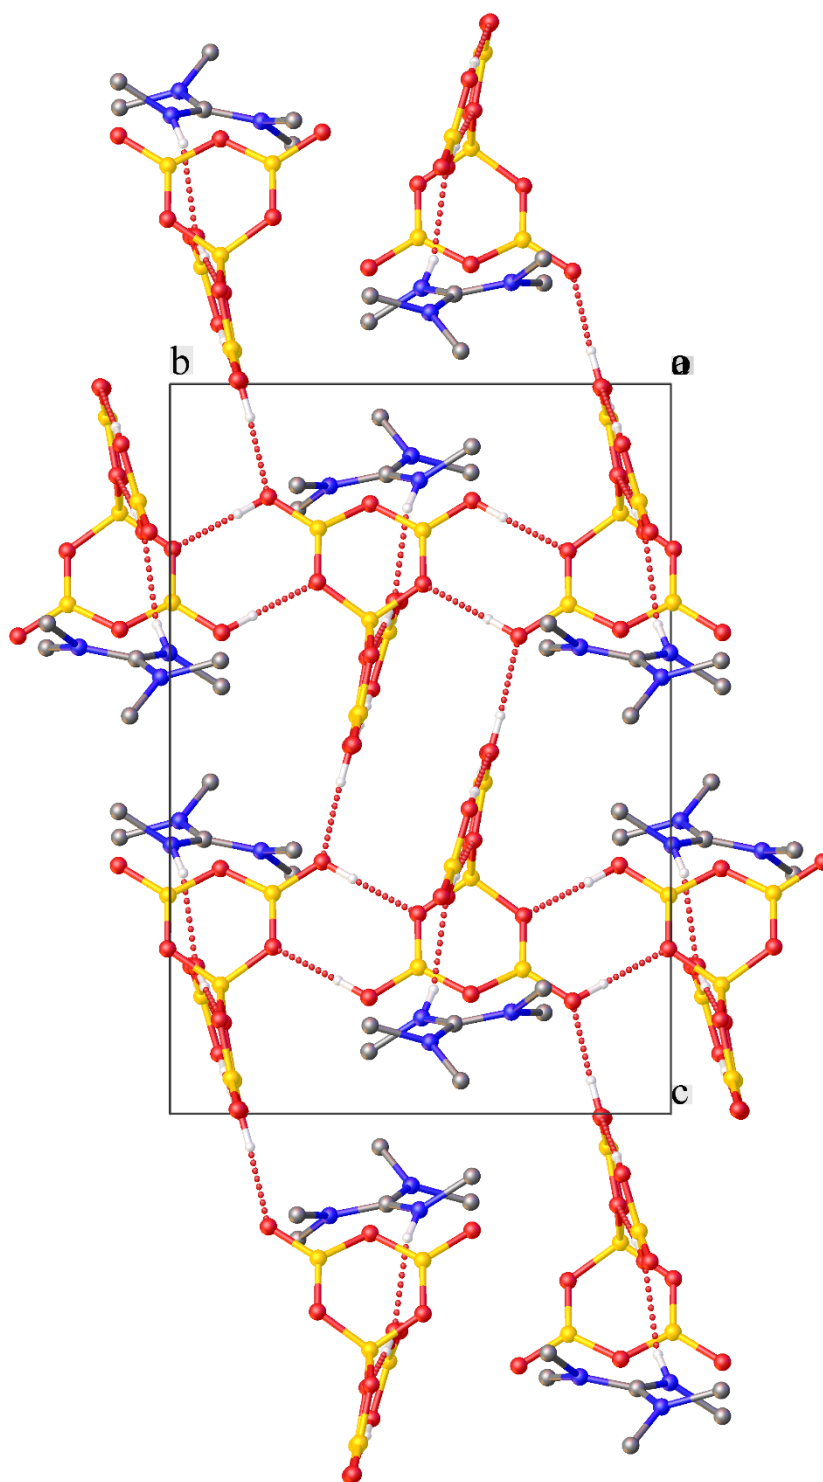

**Figure S9:** Packing diagram of 2019NCS0283.

**Table S29:** Fractional Atomic Coordinates ( $\times 10^4$ ) and Equivalent Isotropic Displacement Parameters ( $\text{\AA}^2 \times 10^3$ ) for **2019NCS0283**.  $U_{eq}$  is defined as 1/3 of the trace of the orthogonalised  $U_{ij}$ .

| Atom  | x           | y          | z         | $U_{eq}$  |
|-------|-------------|------------|-----------|-----------|
| N(1)  | 5176.8(10)  | 5025.2(8)  | 1316.7(6) | 21.4(2)   |
| N(2)  | 2728.7(10)  | 5187.1(8)  | 983.8(5)  | 20.5(2)   |
| N(3)  | 4090.2(9)   | 6818.4(8)  | 1395.1(5) | 19.9(2)   |
| C(1)  | 4000.1(11)  | 5675.7(9)  | 1236.7(6) | 16.8(2)   |
| C(2)  | 5370.0(13)  | 3973.2(10) | 855.4(7)  | 26.9(3)   |
| C(3)  | 2400.6(14)  | 3995.2(10) | 1209.5(8) | 30.4(3)   |
| C(4)  | 1625.3(12)  | 5804.9(11) | 453.8(7)  | 25.1(3)   |
| C(5)  | 2957.3(12)  | 7449.3(10) | 1719.9(7) | 24.1(2)   |
| C(6)  | 5416.5(12)  | 7464.6(10) | 1386.6(7) | 24.8(3)   |
| O(1)  | 9907.4(7)   | 4950.1(6)  | 2739.2(4) | 14.19(16) |
| O(2)  | 8635.7(8)   | 6004.7(6)  | 1639.9(4) | 15.71(16) |
| O(3)  | 9982.2(7)   | 7054.5(6)  | 2712.1(4) | 14.23(16) |
| O(4)  | 8974.2(7)   | 6062.1(6)  | 3750.1(4) | 14.17(16) |
| O(5)  | 10606.6(7)  | 6369.6(6)  | 4939.6(4) | 16.54(16) |
| O(6)  | 11521.4(7)  | 5986.8(6)  | 3710.4(4) | 13.74(16) |
| O(7)  | 8688.8(8)   | 3969.8(7)  | 1595.8(4) | 19.66(18) |
| O(8)  | 8864.1(8)   | 8035.3(6)  | 1546.2(4) | 16.50(16) |
| O(9)  | 8107.6(7)   | 6395.4(7)  | 4962.4(4) | 16.50(16) |
| O(10) | 13050.0(8)  | 6343.7(7)  | 4941.3(4) | 19.88(17) |
| B(1)  | 10112.4(12) | 6009.5(9)  | 3235.0(7) | 13.0(2)   |
| B(2)  | 9083.0(12)  | 4957.3(10) | 2007.9(7) | 14.3(2)   |
| B(3)  | 9169.6(12)  | 7041.9(10) | 1979.8(7) | 13.5(2)   |
| B(4)  | 9238.6(12)  | 6268.8(10) | 4548.2(7) | 13.6(2)   |
| B(5)  | 11745.6(12) | 6220.3(10) | 4513.0(7) | 14.8(2)   |
| O(11) | 6372.6(8)   | 5522.8(8)  | 2980.0(5) | 23.99(19) |
| O(12) | 3931.3(8)   | 5417.3(7)  | 2974.5(4) | 21.08(18) |
| O(13) | 5356.8(8)   | 5975.7(7)  | 4176.6(4) | 19.80(17) |
| B(11) | 5238.3(12)  | 5638.2(10) | 3388.9(7) | 16.8(2)   |

**Table S30:** Anisotropic Displacement Parameters ( $\times 10^4$ ) **2019NCS0283**. The anisotropic displacement factor exponent takes the form:  $-2\pi^2[h^2a^{*2} \times U_{11} + \dots + 2hka^* \times b^* \times U_{12}]$

| Atom  | $U_{11}$ | $U_{22}$ | $U_{33}$ | $U_{23}$ | $U_{13}$ | $U_{12}$ |
|-------|----------|----------|----------|----------|----------|----------|
| N(1)  | 18.3(5)  | 23.6(5)  | 20.8(5)  | -3.5(4)  | -2.8(4)  | 1.1(4)   |
| N(2)  | 17.6(5)  | 21.3(5)  | 22.2(5)  | 0.4(4)   | 1.4(4)   | -3.2(4)  |
| N(3)  | 18.8(5)  | 20.0(5)  | 20.6(4)  | -1.0(4)  | 1.8(3)   | -1.1(4)  |
| C(1)  | 17.6(5)  | 20.9(5)  | 11.6(5)  | 0.5(4)   | 1.5(4)   | -1.1(4)  |
| C(2)  | 24.0(6)  | 26.7(6)  | 29.3(6)  | -6.4(5)  | 1.7(5)   | 3.5(5)   |
| C(3)  | 28.0(6)  | 23.6(6)  | 41.2(7)  | -0.7(5)  | 10.0(5)  | -7.2(5)  |
| C(4)  | 15.4(5)  | 35.3(6)  | 23.5(6)  | 1.0(5)   | -1.1(4)  | -1.1(5)  |
| C(5)  | 26.9(6)  | 23.4(6)  | 22.7(6)  | -0.8(4)  | 5.8(5)   | 5.2(5)   |
| C(6)  | 21.4(6)  | 22.9(6)  | 28.6(6)  | -1.7(5)  | -1.5(5)  | -5.5(4)  |
| O(1)  | 15.8(4)  | 12.8(4)  | 13.2(3)  | -0.5(3)  | -0.2(3)  | 1.0(3)   |
| O(2)  | 17.5(4)  | 13.6(4)  | 14.6(3)  | 0.0(3)   | -2.6(3)  | 0.4(3)   |
| O(3)  | 16.5(3)  | 12.9(4)  | 12.7(3)  | 0.7(3)   | 0.0(3)   | -0.9(3)  |
| O(4)  | 11.6(3)  | 18.1(4)  | 12.5(3)  | -0.3(3)  | 0.6(3)   | -0.2(3)  |
| O(5)  | 13.0(4)  | 23.1(4)  | 13.1(3)  | -2.7(3)  | 0.3(3)   | -0.5(3)  |
| O(6)  | 12.1(3)  | 15.8(4)  | 13.0(3)  | -0.1(3)  | 0.5(3)   | 0.5(3)   |
| O(7)  | 25.5(4)  | 13.3(4)  | 17.7(4)  | -0.7(3)  | -5.3(3)  | 1.1(3)   |
| O(8)  | 20.8(4)  | 13.1(4)  | 14.3(3)  | 0.7(3)   | -2.1(3)  | -1.8(3)  |
| O(9)  | 13.9(4)  | 23.1(4)  | 12.1(3)  | -2.4(3)  | 0.5(3)   | 0.0(3)   |
| O(10) | 12.9(4)  | 30.4(4)  | 16.0(4)  | -4.7(3)  | 0.5(3)   | -0.5(3)  |
| B(1)  | 13.7(5)  | 12.6(5)  | 12.6(5)  | 0.2(4)   | 1.0(4)   | 0.1(4)   |
| B(2)  | 12.6(5)  | 16.0(6)  | 14.3(5)  | 0.1(4)   | 1.7(4)   | 0.2(4)   |
| B(3)  | 11.8(5)  | 15.9(5)  | 13.1(5)  | 0.0(4)   | 2.6(4)   | 0.2(4)   |
| B(4)  | 14.2(5)  | 11.6(5)  | 14.4(5)  | 0.6(4)   | 0.4(4)   | 0.1(4)   |
| B(5)  | 14.9(5)  | 13.5(5)  | 15.6(5)  | -0.2(4)  | 0.9(4)   | -0.1(4)  |
| O(11) | 13.2(4)  | 41.7(5)  | 16.7(4)  | -4.6(3)  | 0.7(3)   | -2.3(3)  |
| O(12) | 12.9(4)  | 32.8(4)  | 17.3(4)  | -2.3(3)  | 1.3(3)   | -1.2(3)  |
| O(13) | 12.2(4)  | 30.0(4)  | 16.6(4)  | -2.5(3)  | -0.1(3)  | 1.0(3)   |
| B(11) | 15.8(6)  | 17.2(6)  | 16.8(5)  | 1.7(4)   | 0.4(4)   | 0.4(4)   |

**Table S31:** Bond Lengths in Å for **2019NCS0283**.

| Atom | Atom | Length/Å   | Atom  | Atom  | Length/Å   |
|------|------|------------|-------|-------|------------|
| N(1) | C(1) | 1.3338(14) | O(7)  | B(2)  | 1.3518(14) |
| N(1) | C(2) | 1.4589(15) | O(8)  | B(3)  | 1.3608(13) |
| N(2) | C(1) | 1.3444(14) | O(9)  | B(4)  | 1.3680(13) |
| N(2) | C(3) | 1.4619(15) | O(10) | B(5)  | 1.3505(14) |
| N(2) | C(4) | 1.4603(15) | O(11) | B(11) | 1.3640(14) |
| N(3) | C(1) | 1.3355(14) | O(12) | B(11) | 1.3595(14) |
| N(3) | C(5) | 1.4642(14) | O(13) | B(11) | 1.3714(14) |
| N(3) | C(6) | 1.4625(14) |       |       |            |
| O(1) | B(1) | 1.4700(13) |       |       |            |
| O(1) | B(2) | 1.3638(14) |       |       |            |
| O(2) | B(2) | 1.3889(13) |       |       |            |
| O(2) | B(3) | 1.3833(13) |       |       |            |
| O(3) | B(1) | 1.4805(13) |       |       |            |
| O(3) | B(3) | 1.3602(13) |       |       |            |
| O(4) | B(1) | 1.4792(13) |       |       |            |
| O(4) | B(4) | 1.3535(13) |       |       |            |
| O(5) | B(4) | 1.3765(13) |       |       |            |
| O(5) | B(5) | 1.3906(13) |       |       |            |
| O(6) | B(1) | 1.4599(13) |       |       |            |
| O(6) | B(5) | 1.3652(13) |       |       |            |

**Table S32:** Bond Angles in ° for **2019NCS0283**.

| Atom  | Atom  | Atom  | Angle/°    |
|-------|-------|-------|------------|
| C(1)  | N(1)  | C(2)  | 124.98(10) |
| C(1)  | N(2)  | C(3)  | 121.38(10) |
| C(1)  | N(2)  | C(4)  | 121.84(9)  |
| C(4)  | N(2)  | C(3)  | 116.76(9)  |
| C(1)  | N(3)  | C(5)  | 121.88(9)  |
| C(1)  | N(3)  | C(6)  | 121.65(9)  |
| C(6)  | N(3)  | C(5)  | 115.65(9)  |
| N(1)  | C(1)  | N(2)  | 120.13(10) |
| N(1)  | C(1)  | N(3)  | 119.83(10) |
| N(3)  | C(1)  | N(2)  | 120.02(10) |
| B(2)  | O(1)  | B(1)  | 121.45(8)  |
| B(3)  | O(2)  | B(2)  | 119.02(8)  |
| B(3)  | O(3)  | B(1)  | 121.36(8)  |
| B(4)  | O(4)  | B(1)  | 122.75(8)  |
| B(4)  | O(5)  | B(5)  | 119.50(8)  |
| B(5)  | O(6)  | B(1)  | 122.90(8)  |
| O(1)  | B(1)  | O(3)  | 109.59(8)  |
| O(1)  | B(1)  | O(4)  | 108.51(8)  |
| O(4)  | B(1)  | O(3)  | 108.02(8)  |
| O(6)  | B(1)  | O(1)  | 109.57(8)  |
| O(6)  | B(1)  | O(3)  | 109.53(8)  |
| O(6)  | B(1)  | O(4)  | 111.58(8)  |
| O(1)  | B(2)  | O(2)  | 120.61(9)  |
| O(7)  | B(2)  | O(1)  | 122.78(9)  |
| O(7)  | B(2)  | O(2)  | 116.59(9)  |
| O(3)  | B(3)  | O(2)  | 120.85(9)  |
| O(3)  | B(3)  | O(8)  | 121.94(9)  |
| O(8)  | B(3)  | O(2)  | 117.20(9)  |
| O(4)  | B(4)  | O(5)  | 121.42(9)  |
| O(4)  | B(4)  | O(9)  | 118.41(9)  |
| O(9)  | B(4)  | O(5)  | 120.16(9)  |
| O(6)  | B(5)  | O(5)  | 120.76(9)  |
| O(10) | B(5)  | O(5)  | 115.63(9)  |
| O(10) | B(5)  | O(6)  | 123.60(10) |
| O(11) | B(11) | O(13) | 123.54(10) |
| O(12) | B(11) | O(11) | 116.83(10) |
| O(12) | B(11) | O(13) | 119.62(10) |

**Table S33:** Torsion Angles in ° for **2019NCS0283**.

| Atom | Atom | Atom | Atom  | Angle/°    |
|------|------|------|-------|------------|
| C(2) | N(1) | C(1) | N(2)  | 28.01(16)  |
| C(2) | N(1) | C(1) | N(3)  | -          |
|      |      |      |       | 150.84(11) |
| C(3) | N(2) | C(1) | N(1)  | 35.28(15)  |
| C(3) | N(2) | C(1) | N(3)  | -          |
|      |      |      |       | 145.87(11) |
| C(4) | N(2) | C(1) | N(1)  | -          |
|      |      |      |       | 142.95(11) |
| C(4) | N(2) | C(1) | N(3)  | 35.90(15)  |
| C(5) | N(3) | C(1) | N(1)  | -          |
|      |      |      |       | 147.90(10) |
| C(5) | N(3) | C(1) | N(2)  | 33.25(15)  |
| C(6) | N(3) | C(1) | N(1)  | 21.33(15)  |
| C(6) | N(3) | C(1) | N(2)  | -          |
|      |      |      |       | 157.52(10) |
| B(1) | O(1) | B(2) | O(2)  | 12.54(14)  |
| B(1) | O(1) | B(2) | O(7)  | -169.14(9) |
| B(1) | O(3) | B(3) | O(2)  | -11.22(14) |
| B(1) | O(3) | B(3) | O(8)  | 169.78(9)  |
| B(1) | O(4) | B(4) | O(5)  | -4.23(15)  |
| B(1) | O(4) | B(4) | O(9)  | 174.76(8)  |
| B(1) | O(6) | B(5) | O(5)  | 7.12(15)   |
| B(1) | O(6) | B(5) | O(10) | -171.59(9) |
| B(2) | O(1) | B(1) | O(3)  | -28.44(12) |
| B(2) | O(1) | B(1) | O(4)  | 89.30(10)  |
| B(2) | O(1) | B(1) | O(6)  | -148.65(9) |
| B(2) | O(2) | B(3) | O(3)  | -7.99(14)  |
| B(2) | O(2) | B(3) | O(8)  | 171.06(9)  |
| B(3) | O(2) | B(2) | O(1)  | 7.39(14)   |
| B(3) | O(2) | B(2) | O(7)  | -171.03(9) |
| B(3) | O(3) | B(1) | O(1)  | 27.81(12)  |
| B(3) | O(3) | B(1) | O(4)  | -90.23(10) |
| B(3) | O(3) | B(1) | O(6)  | 148.05(8)  |
| B(4) | O(4) | B(1) | O(1)  | 131.47(9)  |
| B(4) | O(4) | B(1) | O(3)  | -          |
|      |      |      |       | 109.79(10) |
| B(4) | O(4) | B(1) | O(6)  | 10.66(13)  |
| B(4) | O(5) | B(5) | O(6)  | 0.65(15)   |
| B(4) | O(5) | B(5) | O(10) | 179.46(9)  |
| B(5) | O(5) | B(4) | O(4)  | -2.04(15)  |
| B(5) | O(5) | B(4) | O(9)  | 178.98(9)  |
| B(5) | O(6) | B(1) | O(1)  | -132.26(9) |
| B(5) | O(6) | B(1) | O(3)  | 107.49(10) |
| B(5) | O(6) | B(1) | O(4)  | -12.07(13) |

**Table S34:** Hydrogen Fractional Atomic Coordinates ( $\times 10^4$ ) and Equivalent Isotropic Displacement Parameters ( $\text{\AA}^2 \times 10^3$ ) for **2019NCS0283**.  $U_{eq}$  is defined as 1/3 of the trace of the orthogonalised  $U_{ij}$ .

| Atom  | x         | y        | z        | $U_{eq}$ |
|-------|-----------|----------|----------|----------|
| H(1)  | 5865(17)  | 5261(14) | 1701(10) | 38(4)    |
| H(2A) | 4688.7    | 3975.06  | 361.2    | 40       |
| H(2B) | 5210.29   | 3282.39  | 1174.56  | 40       |
| H(2C) | 6340.66   | 3955.34  | 720.6    | 40       |
| H(3A) | 2445.76   | 3471.22  | 753.76   | 46       |
| H(3B) | 1442.42   | 3971.93  | 1362.18  | 46       |
| H(3C) | 3093.56   | 3743.53  | 1663.81  | 46       |
| H(4A) | 798       | 5930.35  | 731.71   | 38       |
| H(4B) | 1343.1    | 5338.04  | -30.06   | 38       |
| H(4C) | 1994.48   | 6560.76  | 303.9    | 38       |
| H(5A) | 2491.45   | 7988.8   | 1313.68  | 36       |
| H(5B) | 3365.15   | 7891.08  | 2195.42  | 36       |
| H(5C) | 2257.03   | 6890.42  | 1867.93  | 36       |
| H(6A) | 5900.01   | 7554.04  | 1936.6   | 37       |
| H(6B) | 5204.98   | 8237.44  | 1149.28  | 37       |
| H(6C) | 6033.2    | 7035.51  | 1068.07  | 37       |
| H(7)  | 9046(17)  | 3354(15) | 1826(10) | 39(4)    |
| H(8)  | 9244(17)  | 8646(15) | 1779(10) | 37(4)    |
| H(9)  | 8345(17)  | 6594(14) | 5454(10) | 41(4)    |
| H(10) | 13751(19) | 6226(15) | 4673(10) | 45(5)    |
| H(11) | 7180(20)  | 5688(16) | 3258(11) | 49(5)    |
| H(12) | 3248(19)  | 5568(15) | 3235(10) | 41(4)    |
| H(13) | 6200(20)  | 6085(15) | 4412(11) | 46(5)    |

**Table S35:** Hydrogen Bond information for **2019NCS0283**.

| D     | H     | A                  | d(D-H)/ $\text{\AA}$ | d(H-A)/ $\text{\AA}$ | d(D-A)/ $\text{\AA}$ | D-H-A/deg |
|-------|-------|--------------------|----------------------|----------------------|----------------------|-----------|
| N(1)  | H(1)  | O(11)              | 0.894(17)            | 2.162(16)            | 2.9277(12)           | 143.2(13) |
| O(7)  | H(7)  | O(3) <sup>1</sup>  | 0.852(18)            | 1.862(18)            | 2.7106(10)           | 173.5(15) |
| O(8)  | H(8)  | O(1) <sup>2</sup>  | 0.857(18)            | 1.831(18)            | 2.6873(10)           | 178.6(16) |
| O(9)  | H(9)  | O(8) <sup>3</sup>  | 0.858(17)            | 1.885(17)            | 2.7425(10)           | 177.7(16) |
| O(10) | H(10) | O(13) <sup>4</sup> | 0.867(18)            | 1.861(19)            | 2.7254(11)           | 175.2(17) |
| O(11) | H(11) | O(4)               | 0.860(19)            | 1.839(19)            | 2.6958(10)           | 173.9(17) |
| O(12) | H(12) | O(6) <sup>5</sup>  | 0.850(18)            | 1.982(18)            | 2.8276(11)           | 172.7(16) |
| O(13) | H(13) | O(9)               | 0.847(19)            | 1.952(19)            | 2.7992(10)           | 177.8(17) |

-----  
<sup>1</sup>2-x,-1/2+y,1/2-z; <sup>2</sup>2-x,1/2+y,1/2-z; <sup>3</sup>+x,3/2-y,1/2+z; <sup>4</sup>1+x,y,z; <sup>5</sup>-1+x,y,z

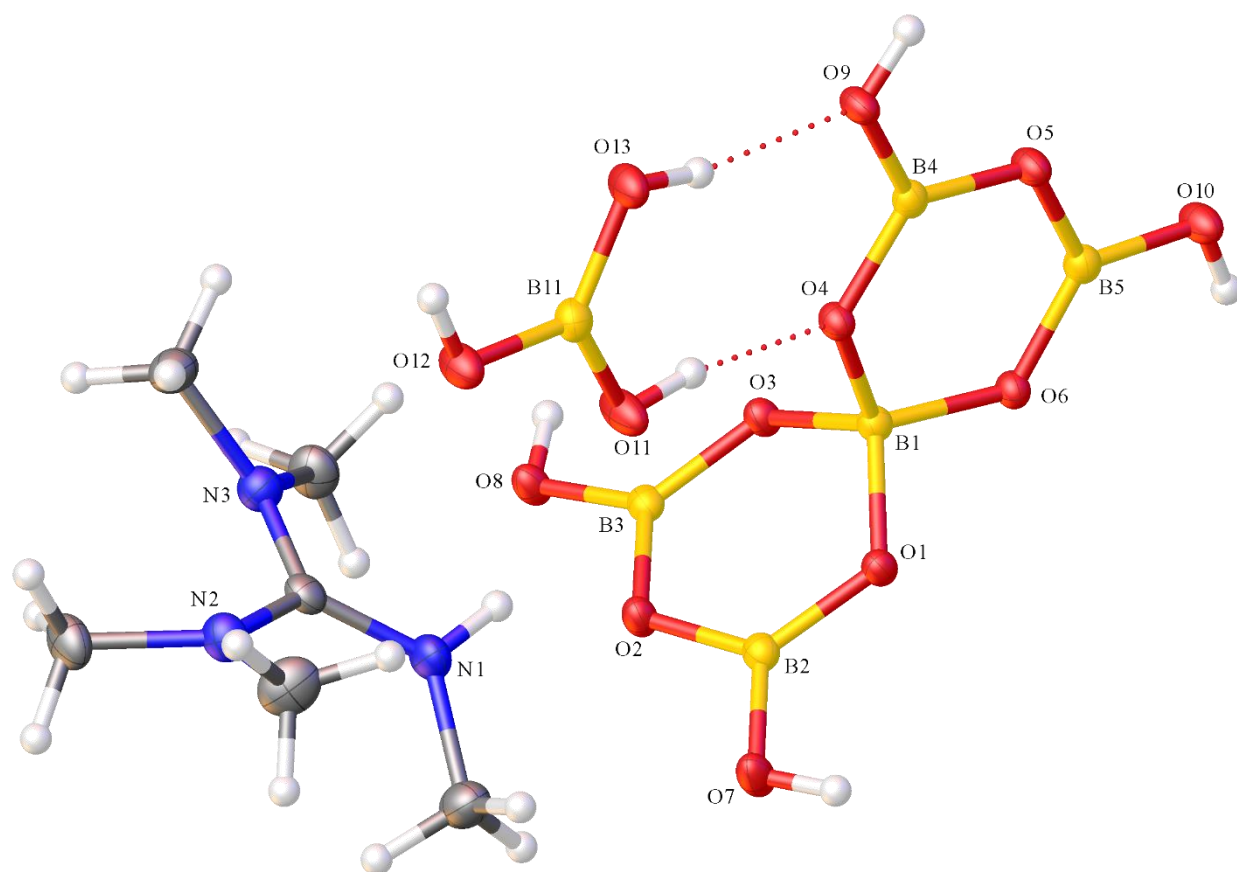

## Citations

CrysAlisPro Software System, Rigaku Oxford Diffraction, (2019).

O.V. Dolomanov and L.J. Bourhis and R.J. Gildea and J.A.K. Howard and H. Puschmann, Olex2: A complete structure solution, refinement and analysis program, *J. Appl. Cryst.*, (2009), **42**, 339-341.

Sheldrick, G.M., Crystal structure refinement with ShelXL, *Acta Cryst.*, (2015), **C27**, 3-8.

Sheldrick, G.M., ShelXT-Integrated space-group and crystal-structure determination, *Acta Cryst.*, (2015), **A71**, 3-8.



Submitted by: **Mike A Beckett**  
Bangor University  
Solved by: **Peter N Horton**  
Sample ID: **MAB/TR/TABCDEB5**

 **$R_1=5.61\%$** 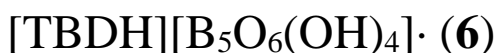

## Crystal Data and Experimental

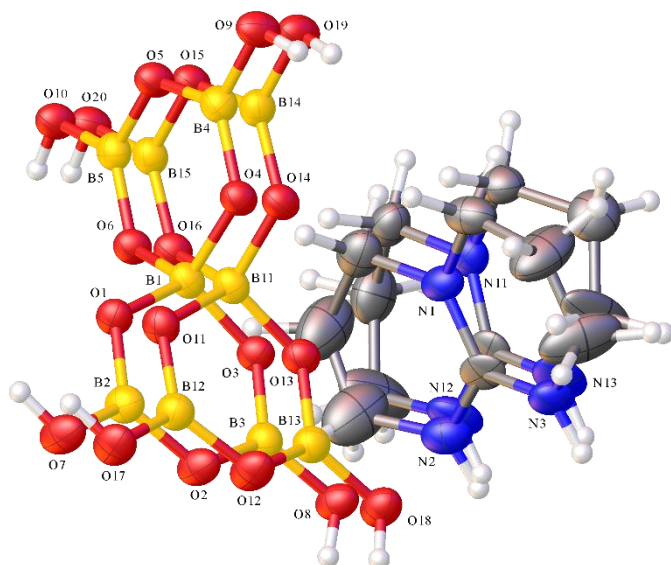

**Experimental.** Single colourless plate-shaped crystals of **2019ncs0282** were crystallised. A suitable crystal with dimensions  $0.21 \times 0.11 \times 0.02 \text{ mm}^3$  was selected and mounted on a Rigaku 007HF equipped with HF Varimax confocal mirrors and an AFC11 goniometer and HyPix 6000HE detector diffractometer. The crystal was kept at a steady  $T = 99.9(7) \text{ K}$  during data collection. The structure was solved with the **ShelXT** 2018/2 (Sheldrick, 2018) solution program using iterative methods and by using **Olex2** 1.5 (Dolomanov et al., 2009) as the graphical interface. The model was refined with **ShelXL** 2018/3 (Sheldrick, 2015) using full matrix least squares minimisation on  $F^2$ .

**Crystal Data.**  $\text{C}_7\text{H}_{18}\text{B}_5\text{N}_3\text{O}_{10}$ ,  $M_r = 358.29$ , triclinic,  $P-1$  (No. 2),  $a = 9.3096(6) \text{ \AA}$ ,  $b = 9.3175(3) \text{ \AA}$ ,  $c = 9.3733(6) \text{ \AA}$ ,  $\alpha = 76.598(5)^\circ$ ,  $\beta = 85.611(5)^\circ$ ,  $\gamma = 79.947(4)^\circ$ ,  $V = 778.22(8) \text{ \AA}^3$ ,  $T = 99.9(7) \text{ K}$ ,  $Z = 2$ ,  $Z' = 1$ ,  $\mu(\text{Cu K}\alpha) = 1.133 \text{ mm}^{-1}$ , 13382 reflections measured, 2836 unique ( $R_{\text{int}} = 0.0443$ ) which were used in all calculations. The final  $wR_2$

was 0.1747 (all data) and  $R_1$  was 0.0561 ( $I \geq 2 \sigma(I)$ ).

| Compound                              | 2019ncs0282                                                |
|---------------------------------------|------------------------------------------------------------|
| Formula                               | $\text{C}_7\text{H}_{18}\text{B}_5\text{N}_3\text{O}_{10}$ |
| $D_{\text{calc.}} / \text{g cm}^{-3}$ | 1.529                                                      |
| $\mu / \text{mm}^{-1}$                | 1.133                                                      |
| Formula Weight                        | 358.29                                                     |
| Colour                                | colourless                                                 |
| Shape                                 | plate-shaped                                               |
| Size/ $\text{mm}^3$                   | $0.21 \times 0.11 \times 0.02$                             |
| $T / \text{K}$                        | 99.9(7)                                                    |
| Crystal System                        | triclinic                                                  |
| Space Group                           | $P-1$                                                      |
| $a / \text{\AA}$                      | 9.3096(6)                                                  |
| $b / \text{\AA}$                      | 9.3175(3)                                                  |
| $c / \text{\AA}$                      | 9.3733(6)                                                  |
| $\alpha / ^\circ$                     | 76.598(5)                                                  |
| $\beta / ^\circ$                      | 85.611(5)                                                  |
| $\gamma / ^\circ$                     | 79.947(4)                                                  |
| $V / \text{\AA}^3$                    | 778.22(8)                                                  |
| $Z$                                   | 2                                                          |
| $Z'$                                  | 1                                                          |
| Wavelength/ $\text{\AA}$              | 1.54178                                                    |
| Radiation type                        | Cu $K\alpha$                                               |
| $\Theta_{\text{min}} / ^\circ$        | 4.828                                                      |
| $\Theta_{\text{max}} / ^\circ$        | 68.221                                                     |
| Measured Refl's.                      | 13382                                                      |
| Indep't Refl's                        | 2836                                                       |
| Refl's $I \geq 2 \sigma(I)$           | 2429                                                       |
| $R_{\text{int}}$                      | 0.0443                                                     |
| Parameters                            | 459                                                        |
| Restraints                            | 1234                                                       |
| Largest Peak                          | 0.349                                                      |
| Deepest Hole                          | -0.307                                                     |
| GooF                                  | 1.076                                                      |
| $wR_2$ (all data)                     | 0.1747                                                     |
| $wR_2$                                | 0.1677                                                     |
| $R_1$ (all data)                      | 0.0616                                                     |
| $R_1$                                 | 0.0561                                                     |

## Structure Quality Indicators

|              |                                        |       |                 |      |                |       |             |       |
|--------------|----------------------------------------|-------|-----------------|------|----------------|-------|-------------|-------|
| Reflections: | d min (Cu\alpha)<br>2 $\Theta$ =136.4° | 0.83  | I/ $\sigma$ (I) | 33.2 | Rint<br>m=4.72 | 4.43% | Full 135.4° | 99.3  |
|              | Shift                                  | 0.000 | Max Peak        | 0.3  | Min Peak       | -0.3  | GooF        | 1.076 |

A colourless plate-shaped crystal with dimensions  $0.21 \times 0.11 \times 0.02$  mm<sup>3</sup> was mounted. Data were collected using a Rigaku 007HF equipped with HF Varimax confocal mirrors and an AFC11 goniometer and HyPix 6000HE detector diffractometer operating at  $T = 99.9(7)$  K.

Data were measured using profile data from  $\omega$ -scans with Cu K $\alpha$  radiation. The diffraction pattern was indexed and the total number of runs and images was based on the strategy calculation from the program CrysAlisPro 1.171.40.45a (Rigaku OD, 2019). The maximum resolution that was achieved was  $\Theta = 68.221^\circ$  (0.83 Å).

The unit cell was refined using CrysAlisPro 1.171.40.45a (Rigaku OD, 2019) on 6687 reflections, 50% of the observed reflections.

Data reduction, scaling and absorption corrections were performed using CrysAlisPro 1.171.40.45a (Rigaku OD, 2019). The final completeness is 99.30 % out to  $68.221^\circ$  in  $\Theta$ . A multi-scan absorption correction was performed using CrysAlisPro 1.171.40.45a (Rigaku Oxford Diffraction, 2019) Empirical absorption correction using spherical harmonics, implemented in SCALE3 ABSPACK scaling algorithm.. The absorption coefficient  $\mu$  of this material is 1.133 mm<sup>-1</sup> at this wavelength ( $\lambda = 1.54178\text{\AA}$ ) and the minimum and maximum transmissions are 0.803 and 1.000.

The structure was solved and the space group  $P-1$  (# 2) determined by the ShelXT 2018/2 (Sheldrick, 2018) structure solution program using iterative methods and refined by full matrix least squares minimisation on  $F^2$  using version 2018/3 of **ShelXL** 2018/3 (Sheldrick, 2015). All non-hydrogen atoms were refined anisotropically. Hydrogen atom positions were calculated geometrically and refined using the riding model.

*\_refine\_special\_details*: All crystals attempted were modulated. This was not taken into consideration during the integration which just used the sub-cell. The structure can be reasonably modelled as two components of whole molecule disorder using both geometrical (SADI, DFIX, FLAT) and displacement (RIGU, SIMU) restraints.

*\_exptl\_absorpt\_process\_details*: CrysAlisPro 1.171.40.45a (Rigaku Oxford Diffraction, 2019) using spherical harmonics as implemented in SCALE3 ABSPACK.

There is a single molecule in the asymmetric unit, which is represented by the reported sum formula. In other words: Z is 2 and Z' is 1.

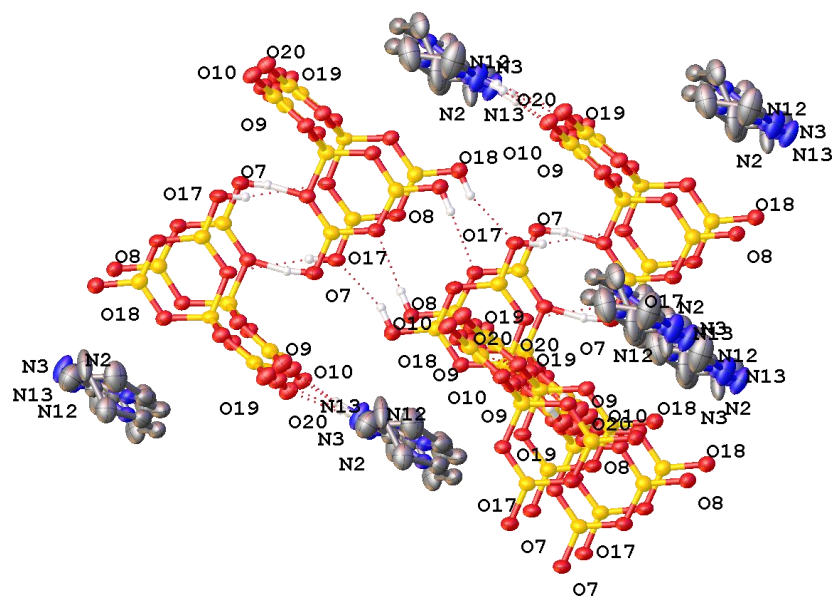

**Figure S10:** The following hydrogen bonding interactions with a maximum D-D distance of 2.9 Å and a minimum angle of 120 ° are present in **2019ncs0282**: O7–O1\_1: 2.094 Å, O8–O2\_5: 2.876 Å, O9–O4\_2: 2.965 Å, O10–O6\_3: 2.828 Å, N12–O20\_4: 3.315 Å, N13–O15\_4: 3.221 Å, O17–O11\_1: 3.368 Å, O18–O17\_5: 2.873 Å, O19–O14\_2: 2.653 Å, O20–O16\_3: 2.787 Å, N2–O10\_4: 2.853 Å, N3–O5\_4: 2.775 Å.

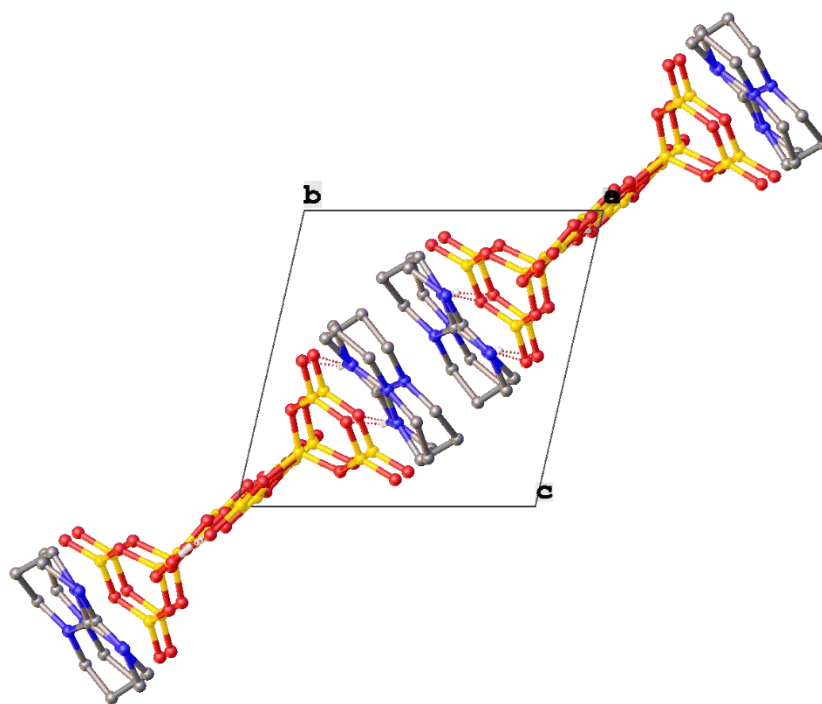

**Figure S11:** Packing diagram of 2019ncs0282.

**Table S36:** Fractional Atomic Coordinates ( $\times 10^4$ ) and Equivalent Isotropic Displacement Parameters ( $\text{\AA}^2 \times 10^3$ ) for **2019ncs0282**.  $U_{eq}$  is defined as 1/3 of the trace of the orthogonalised  $U_{ij}$ .

| Atom | x        | y        | z        | $U_{eq}$ |
|------|----------|----------|----------|----------|
| O1   | 4376(3)  | 9307(3)  | 9166(3)  | 28.6(6)  |
| O2   | 1823(4)  | 9649(3)  | 9775(3)  | 33.6(6)  |
| O3   | 2723(3)  | 8275(3)  | 7953(3)  | 28.0(5)  |
| O4   | 4957(3)  | 6800(3)  | 8826(3)  | 28.1(6)  |
| O5   | 6996(4)  | 6973(4)  | 7150(4)  | 30.1(8)  |
| O6   | 4952(3)  | 8908(3)  | 6739(3)  | 28.2(6)  |
| O7   | 3374(3)  | 10660(4) | 10966(3) | 38.8(6)  |
| O8   | 221(4)   | 8637(3)  | 8552(3)  | 33.9(6)  |
| O9   | 7042(4)  | 4898(4)  | 9101(4)  | 35.0(8)  |
| O10  | 7029(5)  | 8917(5)  | 5082(5)  | 31.1(9)  |
| B1   | 4216(5)  | 8327(5)  | 8173(5)  | 27.2(9)  |
| B2   | 3222(5)  | 9861(6)  | 9969(6)  | 29.9(8)  |
| B3   | 1591(5)  | 8847(6)  | 8770(7)  | 28.8(8)  |
| B4   | 6296(5)  | 6216(6)  | 8390(5)  | 29.0(10) |
| B5   | 6297(6)  | 8298(6)  | 6325(6)  | 28.0(10) |
| N11  | 2207(4)  | 5331(4)  | 5768(4)  | 33.4(8)  |
| N12  | 222(12)  | 7212(10) | 5228(10) | 42.3(17) |
| N13  | 85(12)   | 5248(10) | 7188(9)  | 44.8(18) |
| C11  | 848(10)  | 5937(11) | 6052(10) | 37.6(18) |
| C12  | 1070(8)  | 8305(10) | 4325(8)  | 73(2)    |
| C13  | 2213(5)  | 7283(6)  | 3512(5)  | 55.3(10) |
| C14  | 3122(5)  | 6160(5)  | 4634(5)  | 41.3(9)  |
| C15  | 742(6)   | 4186(9)  | 8430(6)  | 63.3(18) |
| C16  | 1946(4)  | 3133(5)  | 7724(5)  | 51.7(9)  |
| C17  | 2991(4)  | 4065(5)  | 6793(5)  | 40.7(9)  |
| O11  | 3892(3)  | 8904(3)  | 8896(3)  | 28.1(6)  |
| O12  | 1345(3)  | 9123(4)  | 9508(4)  | 37.5(7)  |
| O13  | 2311(3)  | 7848(3)  | 7616(3)  | 28.7(6)  |
| O14  | 4566(3)  | 6407(3)  | 8544(3)  | 28.0(6)  |
| O15  | 6667(4)  | 6618(4)  | 6923(4)  | 29.9(7)  |
| O16  | 4566(3)  | 8533(3)  | 6480(3)  | 27.1(6)  |
| O17  | 2826(3)  | 10216(3) | 10701(4) | 36.9(6)  |
| O18  | -219(3)  | 8274(3)  | 8102(3)  | 36.1(6)  |
| O19  | 6672(4)  | 4525(4)  | 8837(4)  | 34.6(8)  |
| O20  | 6701(5)  | 8588(5)  | 4891(6)  | 32.7(9)  |
| B11  | 3794(6)  | 7921(5)  | 7881(4)  | 26.4(9)  |
| B12  | 2714(8)  | 9404(5)  | 9693(5)  | 29.7(8)  |
| B13  | 1155(7)  | 8416(5)  | 8412(5)  | 29.4(8)  |
| B14  | 5937(5)  | 5861(5)  | 8147(5)  | 27.6(9)  |
| B15  | 5950(6)  | 7969(6)  | 6101(6)  | 27.5(10) |
| N1   | 2066(5)  | 5835(4)  | 6067(4)  | 34.8(9)  |
| N2   | -58(12)  | 7323(12) | 5153(12) | 55(3)    |
| N3   | -192(12) | 5382(11) | 7119(11) | 52(2)    |
| C1   | 623(9)   | 6165(10) | 6127(9)  | 33.3(18) |
| C2   | 725(8)   | 8136(11) | 3921(11) | 90(3)    |
| C3   | 2195(7)  | 8050(8)  | 4033(7)  | 77.3(16) |
| C4   | 3005(5)  | 6699(6)  | 4988(5)  | 43.9(10) |
| C5   | 415(7)   | 3934(8)  | 8064(8)  | 65.0(16) |
| C6   | 1865(6)  | 3959(7)  | 8373(6)  | 69.8(13) |
| C7   | 2850(5)  | 4622(6)  | 7167(5)  | 44.0(10) |

**Table S37:** Anisotropic Displacement Parameters ( $\times 10^4$ ) for **2019ncs0282**. The anisotropic displacement factor exponent takes the form:  $-2\pi^2[h^2a^{*2} \times U_{11} + \dots + 2hka^* \times b^* \times U_{12}]$

| Atom | $U_{11}$ | $U_{22}$ | $U_{33}$ | $U_{23}$  | $U_{13}$  | $U_{12}$  |
|------|----------|----------|----------|-----------|-----------|-----------|
| O1   | 31.2(14) | 30.9(13) | 26.3(12) | -11.9(10) | 2.9(9)    | -6.4(10)  |
| O2   | 30.2(18) | 43.6(15) | 31.9(13) | -20.7(11) | 0.2(11)   | -3.0(14)  |
| O3   | 28.9(16) | 30.1(13) | 26.0(12) | -10.0(10) | 2.8(10)   | -3.6(11)  |
| O4   | 30.0(14) | 25.8(14) | 26.7(13) | -5.8(10)  | 3.9(9)    | -1.8(10)  |
| O5   | 31.8(18) | 27.6(18) | 27.2(15) | -4.2(12)  | 5.3(12)   | -0.6(12)  |
| O6   | 29.7(15) | 28.8(14) | 24.7(13) | -6.8(10)  | 4.5(10)   | -2.8(10)  |
| O7   | 32.8(14) | 53.8(16) | 37.9(15) | -28.9(12) | 2.6(10)   | -5.7(12)  |
| O8   | 26.9(16) | 43.0(15) | 35.4(14) | -18.7(11) | 0.7(11)   | -3.0(12)  |
| O9   | 34.1(18) | 30.4(17) | 32.0(17) | 1.5(12)   | 6.7(12)   | 2.9(12)   |
| O10  | 32(2)    | 29(2)    | 28.1(16) | -3.1(13)  | 6.8(13)   | -1.4(13)  |
| B1   | 33(2)    | 25(2)    | 22(2)    | -3.2(16)  | 0.8(16)   | -5.0(16)  |
| B2   | 32(2)    | 34(2)    | 25(2)    | -11.4(17) | -1.0(17)  | -4.1(18)  |
| B3   | 30(2)    | 30(2)    | 26(2)    | -7.2(18)  | -1.6(18)  | -4.3(17)  |
| B4   | 32(2)    | 30(2)    | 25(2)    | -7.2(16)  | -1.3(16)  | -3.5(16)  |
| B5   | 33(3)    | 29(3)    | 24(2)    | -8.5(16)  | -1.1(16)  | -6.0(16)  |
| N11  | 31.9(17) | 38(2)    | 34.1(19) | -16.4(15) | 3.7(13)   | -6.6(15)  |
| N12  | 38(4)    | 48(3)    | 42(3)    | -18(3)    | -2(2)     | 1(2)      |
| N13  | 41(4)    | 51(3)    | 47(3)    | -26(3)    | 13(2)     | -5(2)     |
| C11  | 35(3)    | 43(3)    | 39(3)    | -17(2)    | 2(2)      | -7(2)     |
| C12  | 43(3)    | 86(4)    | 70(4)    | 39(3)     | -33(2)    | -22(3)    |
| C13  | 54(2)    | 65(3)    | 48(2)    | 2(2)      | 2.5(17)   | -33(2)    |
| C14  | 38(2)    | 49(2)    | 44(2)    | -22.4(19) | 9.1(16)   | -14.4(18) |
| C15  | 43(3)    | 110(4)   | 35(3)    | 13(2)     | -10.0(19) | -45(3)    |
| C16  | 49(2)    | 55(2)    | 44(2)    | 7.2(18)   | -9.1(16)  | -11.0(17) |
| C17  | 34.7(19) | 42(2)    | 46(2)    | -15.6(18) | -5.6(16)  | 1.6(17)   |
| O11  | 33.8(15) | 28.4(13) | 24.6(13) | -12.2(11) | 3.6(11)   | -5.0(10)  |
| O12  | 32.6(16) | 48.8(17) | 39.4(17) | -28.6(14) | 8.7(13)   | -8.3(11)  |
| O13  | 28.9(14) | 29.0(12) | 28.0(12) | -8.5(10)  | 3.5(9)    | -3.4(9)   |
| O14  | 31.6(15) | 25.4(13) | 25.6(13) | -5.3(10)  | 4.3(10)   | -3.7(10)  |
| O15  | 33.1(18) | 25.1(17) | 28.4(16) | -4.3(11)  | 6.4(12)   | -1.9(11)  |
| O16  | 29.9(15) | 27.5(14) | 21.9(13) | -4.1(10)  | 3.8(10)   | -3.4(10)  |
| O17  | 36.1(15) | 44.0(15) | 38.4(15) | -25.9(12) | 7.5(13)   | -9.2(11)  |
| O18  | 31.1(14) | 41.7(14) | 40.6(14) | -19.6(11) | 5.0(10)   | -8.6(10)  |
| O19  | 34.0(18) | 29.0(17) | 34.8(18) | -1.8(11)  | 8.6(12)   | -0.6(11)  |
| O20  | 34(2)    | 29(2)    | 30.5(18) | -1.8(13)  | 6.2(14)   | -1.3(13)  |
| B11  | 32(3)    | 26(2)    | 21.8(18) | -8.4(15)  | 2.8(15)   | -2.5(17)  |
| B12  | 31(3)    | 30(2)    | 29(2)    | -11.2(16) | 2.5(18)   | -4(2)     |
| B13  | 29(3)    | 30(2)    | 28(2)    | -6.6(16)  | 1.1(17)   | -3.4(18)  |
| B14  | 32(2)    | 29(2)    | 23(2)    | -9.3(16)  | 1.6(16)   | -5.4(16)  |
| B15  | 33(3)    | 27(2)    | 24(2)    | -8.6(16)  | 1.8(17)   | -4.2(17)  |
| N1   | 31.0(19) | 41(2)    | 35.1(19) | -17.4(15) | 0.1(13)   | -0.5(16)  |
| N2   | 30(3)    | 66(4)    | 54(4)    | 12(3)     | -5(2)     | 2(2)      |
| N3   | 29(3)    | 58(3)    | 55(3)    | 9(2)      | 9.9(19)   | -2(2)     |
| C1   | 37(3)    | 43(3)    | 24(3)    | -20(2)    | 4(2)      | -2(2)     |
| C2   | 58(4)    | 73(4)    | 110(7)   | 30(4)     | -3(4)     | -4(3)     |
| C3   | 74(4)    | 83(4)    | 70(3)    | 19(3)     | -23(3)    | -37(3)    |
| C4   | 45(2)    | 53(3)    | 41(2)    | -23.0(19) | 10.7(16)  | -16(2)    |
| C5   | 54(3)    | 67(3)    | 66(4)    | -5(3)     | 0(3)      | -3(3)     |
| C6   | 61(3)    | 71(3)    | 68(3)    | 11(3)     | -24(2)    | -12(2)    |
| C7   | 39(2)    | 47(3)    | 46(2)    | -19.2(18) | -6.7(16)  | 5.7(18)   |

**Table S38:** Bond Lengths in Å for **2019ncs0282**.

| Atom | Atom | Length/Å  | Atom | Atom | Length/Å  |
|------|------|-----------|------|------|-----------|
| O1   | B1   | 1.478(6)  | O11  | B11  | 1.483(5)  |
| O1   | B2   | 1.360(6)  | O11  | B12  | 1.354(6)  |
| O2   | B2   | 1.383(5)  | O12  | B12  | 1.376(8)  |
| O2   | B3   | 1.381(8)  | O12  | B13  | 1.379(5)  |
| O3   | B1   | 1.432(5)  | O13  | B11  | 1.438(6)  |
| O3   | B3   | 1.360(7)  | O13  | B13  | 1.362(6)  |
| O4   | B1   | 1.481(5)  | O14  | B11  | 1.484(5)  |
| O4   | B4   | 1.344(6)  | O14  | B14  | 1.348(5)  |
| O5   | B4   | 1.392(6)  | O15  | B14  | 1.396(6)  |
| O5   | B5   | 1.378(6)  | O15  | B15  | 1.399(6)  |
| O6   | B1   | 1.491(5)  | O16  | B11  | 1.488(5)  |
| O6   | B5   | 1.349(6)  | O16  | B15  | 1.358(6)  |
| O7   | B2   | 1.352(7)  | O17  | B12  | 1.360(6)  |
| O8   | B3   | 1.361(6)  | O18  | B13  | 1.368(7)  |
| O9   | B4   | 1.352(6)  | O19  | B14  | 1.354(6)  |
| O10  | B5   | 1.364(7)  | O20  | B15  | 1.350(7)  |
| N11  | C11  | 1.327(10) | N1   | C1   | 1.324(9)  |
| N11  | C14  | 1.470(6)  | N1   | C4   | 1.472(6)  |
| N11  | C17  | 1.459(6)  | N1   | C7   | 1.470(6)  |
| N12  | C11  | 1.323(11) | N2   | C1   | 1.339(11) |
| N12  | C12  | 1.468(11) | N2   | C2   | 1.448(12) |
| N13  | C11  | 1.333(12) | N3   | C1   | 1.320(11) |
| N13  | C15  | 1.440(10) | N3   | C5   | 1.478(10) |
| C12  | C13  | 1.574(9)  | C2   | C3   | 1.368(7)  |
| C13  | C14  | 1.495(6)  | C3   | C4   | 1.485(7)  |
| C15  | C16  | 1.568(8)  | C5   | C6   | 1.407(6)  |
| C16  | C17  | 1.509(6)  | C6   | C7   | 1.488(7)  |

**Table S39:** Bond Angles in ° for **2019ncs0282**.

| Atom | Atom | Atom | Angle/°  | Atom | Atom | Atom | Angle/°  |
|------|------|------|----------|------|------|------|----------|
| B2   | O1   | B1   | 121.8(4) | C11  | N11  | C14  | 120.3(6) |
| B3   | O2   | B2   | 119.8(4) | C11  | N11  | C17  | 122.0(6) |
| B3   | O3   | B1   | 123.0(5) | C17  | N11  | C14  | 115.5(4) |
| B4   | O4   | B1   | 123.6(3) | C11  | N12  | C12  | 122.4(9) |
| B5   | O5   | B4   | 120.2(4) | C11  | N13  | C15  | 123.7(9) |
| B5   | O6   | B1   | 123.2(3) | N11  | C11  | N13  | 119.6(9) |
| O1   | B1   | O4   | 108.0(3) | N12  | C11  | N11  | 121.5(9) |
| O1   | B1   | O6   | 107.6(4) | N12  | C11  | N13  | 118.9(9) |
| O3   | B1   | O1   | 112.8(3) | N12  | C12  | C13  | 101.6(7) |
| O3   | B1   | O4   | 109.0(4) | C14  | C13  | C12  | 108.6(4) |
| O3   | B1   | O6   | 109.6(3) | N11  | C14  | C13  | 111.4(4) |
| O4   | B1   | O6   | 109.7(3) | N13  | C15  | C16  | 104.0(5) |
| O1   | B2   | O2   | 120.8(6) | C17  | C16  | C15  | 108.7(4) |
| O7   | B2   | O1   | 122.3(4) | N11  | C17  | C16  | 111.0(3) |
| O7   | B2   | O2   | 116.9(4) | B12  | O11  | B11  | 121.8(4) |
| O3   | B3   | O2   | 120.7(4) | B12  | O12  | B13  | 119.1(4) |
| O3   | B3   | O8   | 118.5(7) | B13  | O13  | B11  | 122.4(4) |
| O8   | B3   | O2   | 120.8(5) | B14  | O14  | B11  | 123.8(3) |
| O4   | B4   | O5   | 120.3(4) | B14  | O15  | B15  | 118.9(4) |
| O4   | B4   | O9   | 123.5(4) | B15  | O16  | B11  | 123.6(3) |
| O9   | B4   | O5   | 116.2(4) | O11  | B11  | O14  | 107.6(3) |
| O6   | B5   | O5   | 120.6(4) | O11  | B11  | O16  | 107.1(4) |
| O6   | B5   | O10  | 123.1(5) | O13  | B11  | O11  | 112.5(3) |
| O10  | B5   | O5   | 116.2(5) | O13  | B11  | O14  | 109.9(4) |

| Atom | Atom | Atom | Angle/°  | Atom | Atom | Atom | Angle/°  |
|------|------|------|----------|------|------|------|----------|
| O13  | B11  | O16  | 110.2(3) | C1   | N1   | C4   | 123.6(6) |
| O14  | B11  | O16  | 109.5(3) | C1   | N1   | C7   | 121.2(6) |
| O11  | B12  | O12  | 121.3(4) | C7   | N1   | C4   | 115.0(4) |
| O11  | B12  | O17  | 121.7(6) | C1   | N2   | C2   | 121.7(9) |
| O17  | B12  | O12  | 117.0(5) | C1   | N3   | C5   | 122.0(9) |
| O13  | B13  | O12  | 121.5(6) | N1   | C1   | N2   | 119.9(9) |
| O13  | B13  | O18  | 118.5(5) | N3   | C1   | N1   | 122.4(9) |
| O18  | B13  | O12  | 120.0(4) | N3   | C1   | N2   | 117.7(8) |
| O14  | B14  | O15  | 121.2(4) | C3   | C2   | N2   | 117.4(8) |
| O14  | B14  | O19  | 123.3(4) | C2   | C3   | C4   | 118.5(6) |
| O19  | B14  | O15  | 115.3(4) | N1   | C4   | C3   | 113.8(4) |
| O16  | B15  | O15  | 120.7(4) | C6   | C5   | N3   | 109.4(7) |
| O20  | B15  | O15  | 115.1(5) | C5   | C6   | C7   | 118.9(5) |
| O20  | B15  | O16  | 124.0(5) | N1   | C7   | C6   | 112.7(4) |

**Table S40:** Torsion Angles in ° for **2019ncs0282**.

| Atom | Atom | Atom | Atom | Angle/°   |
|------|------|------|------|-----------|
| B1   | O1   | B2   | O2   | -6.5(5)   |
| B1   | O1   | B2   | O7   | 174.7(3)  |
| B1   | O3   | B3   | O2   | 6.4(5)    |
| B1   | O3   | B3   | O8   | -174.9(3) |
| B1   | O4   | B4   | O5   | -8.2(7)   |
| B1   | O4   | B4   | O9   | 171.7(4)  |
| B1   | O6   | B5   | O5   | 8.0(7)    |
| B1   | O6   | B5   | O10  | -173.2(4) |
| B2   | O1   | B1   | O3   | 11.0(4)   |
| B2   | O1   | B1   | O4   | -109.5(4) |
| B2   | O1   | B1   | O6   | 132.1(3)  |
| B2   | O2   | B3   | O3   | -0.7(5)   |
| B2   | O2   | B3   | O8   | -179.4(3) |
| B3   | O2   | B2   | O1   | 0.9(5)    |
| B3   | O2   | B2   | O7   | 179.8(3)  |
| B3   | O3   | B1   | O1   | -11.0(4)  |
| B3   | O3   | B1   | O4   | 109.0(4)  |
| B3   | O3   | B1   | O6   | -130.9(4) |
| B4   | O4   | B1   | O1   | -100.5(4) |
| B4   | O4   | B1   | O3   | 136.6(4)  |
| B4   | O4   | B1   | O6   | 16.5(6)   |
| B4   | O5   | B5   | O6   | 2.6(7)    |
| B4   | O5   | B5   | O10  | -176.3(4) |
| B5   | O5   | B4   | O4   | -2.6(7)   |
| B5   | O5   | B4   | O9   | 177.6(4)  |
| B5   | O6   | B1   | O1   | 100.8(4)  |
| B5   | O6   | B1   | O3   | -136.1(4) |
| B5   | O6   | B1   | O4   | -16.4(6)  |
| N12  | C12  | C13  | C14  | -61.9(6)  |
| N13  | C15  | C16  | C17  | 58.5(6)   |
| C11  | N11  | C14  | C13  | -25.3(6)  |
| C11  | N11  | C17  | C16  | 27.4(6)   |
| C11  | N12  | C12  | C13  | 48.7(7)   |
| C11  | N13  | C15  | C16  | -46.1(7)  |
| C12  | N12  | C11  | N11  | -22.9(7)  |
| C12  | N12  | C11  | N13  | 157.4(7)  |
| C12  | C13  | C14  | N11  | 53.6(6)   |
| C14  | N11  | C11  | N12  | 7.7(5)    |
| C14  | N11  | C11  | N13  | -172.6(4) |

| Atom | Atom | Atom | Atom | Angle/°    |
|------|------|------|------|------------|
| C14  | N11  | C17  | C16  | -169.6(4)  |
| C15  | N13  | C11  | N11  | 22.5(7)    |
| C15  | N13  | C11  | N12  | -157.8(7)  |
| C15  | C16  | C17  | N11  | -51.7(5)   |
| C17  | N11  | C11  | N12  | 169.9(5)   |
| C17  | N11  | C11  | N13  | -10.4(5)   |
| C17  | N11  | C14  | C13  | 171.5(4)   |
| B11  | O11  | B12  | O12  | -5.4(5)    |
| B11  | O11  | B12  | O17  | 175.2(3)   |
| B11  | O13  | B13  | O12  | 1.2(5)     |
| B11  | O13  | B13  | O18  | -178.9(3)  |
| B11  | O14  | B14  | O15  | -9.1(7)    |
| B11  | O14  | B14  | O19  | 174.7(4)   |
| B11  | O16  | B15  | O15  | 9.6(7)     |
| B11  | O16  | B15  | O20  | -174.4(4)  |
| B12  | O11  | B11  | O13  | 12.5(4)    |
| B12  | O11  | B11  | O14  | -108.6(4)  |
| B12  | O11  | B11  | O16  | 133.7(3)   |
| B12  | O12  | B13  | O13  | 7.1(5)     |
| B12  | O12  | B13  | O18  | -172.7(3)  |
| B13  | O12  | B12  | O11  | -4.9(5)    |
| B13  | O12  | B12  | O17  | 174.5(3)   |
| B13  | O13  | B11  | O11  | -10.4(4)   |
| B13  | O13  | B11  | O14  | 109.4(4)   |
| B13  | O13  | B11  | O16  | -129.8(3)  |
| B14  | O14  | B11  | O11  | -99.9(4)   |
| B14  | O14  | B11  | O13  | 137.3(4)   |
| B14  | O14  | B11  | O16  | 16.1(6)    |
| B14  | O15  | B15  | O16  | -0.3(6)    |
| B14  | O15  | B15  | O20  | -176.5(4)  |
| B15  | O15  | B14  | O14  | 0.0(6)     |
| B15  | O15  | B14  | O19  | 176.5(4)   |
| B15  | O16  | B11  | O11  | 100.0(4)   |
| B15  | O16  | B11  | O13  | -137.4(4)  |
| B15  | O16  | B11  | O14  | -16.4(6)   |
| N2   | C2   | C3   | C4   | 27.2(14)   |
| N3   | C5   | C6   | C7   | -42.9(9)   |
| C1   | N1   | C4   | C3   | 4.2(7)     |
| C1   | N1   | C7   | C6   | -5.6(6)    |
| C1   | N2   | C2   | C3   | -22.0(15)  |
| C1   | N3   | C5   | C6   | 33.5(10)   |
| C2   | N2   | C1   | N1   | 7.1(10)    |
| C2   | N2   | C1   | N3   | -172.5(10) |
| C2   | C3   | C4   | N1   | -18.8(10)  |
| C4   | N1   | C1   | N2   | 1.3(6)     |
| C4   | N1   | C1   | N3   | -179.1(5)  |
| C4   | N1   | C7   | C6   | 170.1(4)   |
| C5   | N3   | C1   | N1   | -11.0(9)   |
| C5   | N3   | C1   | N2   | 168.6(9)   |
| C5   | C6   | C7   | N1   | 31.0(8)    |
| C7   | N1   | C1   | N2   | 176.7(5)   |
| C7   | N1   | C1   | N3   | -3.8(6)    |
| C7   | N1   | C4   | C3   | -171.4(4)  |



**Table S41:** Hydrogen Fractional Atomic Coordinates ( $\times 10^4$ ) and Equivalent Isotropic Displacement Parameters ( $\text{\AA}^2 \times 10^3$ ) for **2019ncs0282**.  $U_{eq}$  is defined as 1/3 of the trace of the orthogonalised  $U_{ij}$ .

| Atom | x        | y        | z        | $U_{eq}$ |
|------|----------|----------|----------|----------|
| H7   | 4253.05  | 10758.92 | 10973    | 58       |
| H8   | -394.88  | 9217.73  | 8941.43  | 51       |
| H9   | 6545.73  | 4535.72  | 9840.89  | 52       |
| H10  | 6510.69  | 9701.69  | 4640.91  | 47       |
| H12  | -736.72  | 7412.54  | 5220.16  | 51       |
| H13  | -873.99  | 5454.67  | 7178.59  | 54       |
| H12A | 1556.88  | 8796.04  | 4938.35  | 87       |
| H12B | 448.87   | 9077.1   | 3621.07  | 87       |
| H13A | 1699.7   | 6766.24  | 2944.55  | 66       |
| H13B | 2842.33  | 7899.83  | 2821.6   | 66       |
| H14A | 3780.71  | 5449.06  | 4146.38  | 50       |
| H14B | 3733.11  | 6678.27  | 5100.92  | 50       |
| H15A | 13.59    | 3615.96  | 9019.79  | 76       |
| H15B | 1180.74  | 4693.17  | 9065.21  | 76       |
| H16A | 2478.13  | 2366.05  | 8503.92  | 62       |
| H16B | 1487.62  | 2617.29  | 7111.1   | 62       |
| H17A | 3567.21  | 4435.8   | 7435.02  | 49       |
| H17B | 3676.94  | 3437.14  | 6238.53  | 49       |
| H17  | 3663.19  | 10454.1  | 10625.49 | 55       |
| H18  | -837.2   | 8719.8   | 8619.19  | 54       |
| H19  | 6217.35  | 4198.81  | 9620.8   | 52       |
| H20  | 6166.81  | 9334.98  | 4407.2   | 49       |
| H2   | -1005.37 | 7598.21  | 5265.39  | 66       |
| H3   | -1125.8  | 5734.64  | 7219.5   | 62       |
| H2A  | 569.09   | 7773.4   | 3040.78  | 108      |
| H2B  | 276.98   | 9203.24  | 3746.35  | 108      |
| H3A  | 2351.08  | 8929.96  | 4388.48  | 93       |
| H3B  | 2648.61  | 8143.83  | 3032.23  | 93       |
| H4A  | 3539.6   | 6043.34  | 4362.44  | 53       |
| H4B  | 3735.7   | 7007.92  | 5518.88  | 53       |
| H5A  | -179.35  | 3748.58  | 8990.11  | 78       |
| H5B  | 388.1    | 3115.83  | 7559.55  | 78       |
| H6A  | 2324.49  | 2915.78  | 8774.62  | 84       |
| H6B  | 1832.28  | 4508.73  | 9164.14  | 84       |
| H7A  | 3600.82  | 5014.75  | 7590.78  | 53       |
| H7B  | 3355.92  | 3828.2   | 6679.26  | 53       |

**Table S42:** Hydrogen Bond information for **2019ncs0282**.

| D   | H   | A                | d(D-H)/ $\text{\AA}$ | d(H-A)/ $\text{\AA}$ | d(D-A)/ $\text{\AA}$ | D-H-A/deg |
|-----|-----|------------------|----------------------|----------------------|----------------------|-----------|
| O7  | H7  | O1 <sup>1</sup>  | 0.84                 | 1.27                 | 2.094(4)             | 168.0     |
| O8  | H8  | O2 <sup>2</sup>  | 0.84                 | 2.05                 | 2.876(4)             | 169.8     |
| O9  | H9  | O4 <sup>3</sup>  | 0.84                 | 2.16                 | 2.965(4)             | 159.2     |
| O10 | H10 | O6 <sup>4</sup>  | 0.84                 | 2.02                 | 2.828(6)             | 160.9     |
| N12 | H12 | O20 <sup>5</sup> | 0.88                 | 2.45                 | 3.315(12)            | 165.9     |
| N13 | H13 | O15 <sup>5</sup> | 0.88                 | 2.36                 | 3.221(11)            | 165.8     |
| O17 | H17 | O11 <sup>1</sup> | 0.84                 | 2.55                 | 3.368(4)             | 165.3     |
| O18 | H18 | O17 <sup>2</sup> | 0.84                 | 2.07                 | 2.873(4)             | 159.4     |
| O19 | H19 | O14 <sup>3</sup> | 0.84                 | 1.82                 | 2.653(5)             | 171.3     |
| O20 | H20 | O16 <sup>4</sup> | 0.84                 | 1.99                 | 2.787(6)             | 158.8     |
| N2  | H2  | O10 <sup>5</sup> | 0.88                 | 2.01                 | 2.853(12)            | 159.2     |
| N3  | H3  | O5 <sup>5</sup>  | 0.88                 | 1.92                 | 2.775(11)            | 165.1     |

----  
<sup>1</sup>1-x,2-y,2-z; <sup>2</sup>-x,2-y,2-z; <sup>3</sup>1-x,1-y,2-z; <sup>4</sup>1-x,2-y,1-z; <sup>5</sup>-1+x,+y,+z

**Table S43:** Atomic Occupancies for all atoms that are not fully occupied in **2019ncs0282**.

| <b>Atom</b> | <b>Occupancy</b> | <b>Atom</b> | <b>Occupancy</b> |
|-------------|------------------|-------------|------------------|
| O1          | 0.5              | B14         | 0.5              |
| O2          | 0.5              | B15         | 0.5              |
| O3          | 0.5              | N1          | 0.5              |
| O4          | 0.5              | N2          | 0.5              |
| O5          | 0.5              | H2          | 0.5              |
| O6          | 0.5              | N3          | 0.5              |
| O7          | 0.5              | H3          | 0.5              |
| H7          | 0.5              | C1          | 0.5              |
| O8          | 0.5              | C2          | 0.5              |
| H8          | 0.5              | H2A         | 0.5              |
| O9          | 0.5              | H2B         | 0.5              |
| H9          | 0.5              | C3          | 0.5              |
| O10         | 0.5              | H3A         | 0.5              |
| H10         | 0.5              | H3B         | 0.5              |
| B1          | 0.5              | C4          | 0.5              |
| B2          | 0.5              | H4A         | 0.5              |
| B3          | 0.5              | H4B         | 0.5              |
| B4          | 0.5              | C5          | 0.5              |
| B5          | 0.5              | H5A         | 0.5              |
| N11         | 0.5              | H5B         | 0.5              |
| N12         | 0.5              | C6          | 0.5              |
| H12         | 0.5              | H6A         | 0.5              |
| N13         | 0.5              | H6B         | 0.5              |
| H13         | 0.5              | C7          | 0.5              |
| C11         | 0.5              | H7A         | 0.5              |
| C12         | 0.5              | H7B         | 0.5              |
| H12A        | 0.5              |             |                  |
| H12B        | 0.5              |             |                  |
| C13         | 0.5              |             |                  |
| H13A        | 0.5              |             |                  |
| H13B        | 0.5              |             |                  |
| C14         | 0.5              |             |                  |
| H14A        | 0.5              |             |                  |
| H14B        | 0.5              |             |                  |
| C15         | 0.5              |             |                  |
| H15A        | 0.5              |             |                  |
| H15B        | 0.5              |             |                  |
| C16         | 0.5              |             |                  |
| H16A        | 0.5              |             |                  |
| H16B        | 0.5              |             |                  |
| C17         | 0.5              |             |                  |
| H17A        | 0.5              |             |                  |
| H17B        | 0.5              |             |                  |
| O11         | 0.5              |             |                  |
| O12         | 0.5              |             |                  |
| O13         | 0.5              |             |                  |
| O14         | 0.5              |             |                  |
| O15         | 0.5              |             |                  |
| O16         | 0.5              |             |                  |
| O17         | 0.5              |             |                  |
| H17         | 0.5              |             |                  |
| O18         | 0.5              |             |                  |
| H18         | 0.5              |             |                  |
| O19         | 0.5              |             |                  |
| H19         | 0.5              |             |                  |
| O20         | 0.5              |             |                  |
| H20         | 0.5              |             |                  |
| B11         | 0.5              |             |                  |
| B12         | 0.5              |             |                  |
| B13         | 0.5              |             |                  |

## Citations

CrysAlisPro (Rigaku, V1.171.40.45a, 2019)

O.V. Dolomanov and L.J. Bourhis and R.J. Gildea and J.A.K. Howard and H. Puschmann, Olex2: A complete structure solution, refinement and analysis program, *J. Appl. Cryst.*, (2009), **42**, 339-341.

Sheldrick, G.M., Crystal structure refinement with ShelXL, *Acta Cryst.*, (2015), **C71**, 3-8.

Sheldrick, G.M., ShelXT-Integrated space-group and crystal-structure determination, *Acta Cryst.*, (2015), **A71**, 3-8.
