# Supplementary material for: Structural (XRD) Characterization and an Analysis of H-Bonding Motifs in Some Tetrahydroxidohexaoxidopentaborate(1-) Salts of N-Substituted Guanidinium Cations
Source: MDPI journal article supplement (doi:10.3390/molecules28073273), 2023-04-06
Supplement: s1 [file s1]

```
R(reflections)= 0.0561( 2429)      wR2(reflections)=
S = 1.076                        0.1747( 2836)
Npar= 459
```

**test-name\_ALERT\_alert-type\_alert-level.**  
Click on the hyperlinks for more details of the test.

|                                                     |           |
|-----------------------------------------------------|-----------|
| PLAT088_ALERT_3_B Poor Data / Parameter Ratio ..... | 6.18 Note |
|-----------------------------------------------------|-----------|

|                   |                                                 |       |              |
|-------------------|-------------------------------------------------|-------|--------------|
| PLAT042_ALERT_1_C | Calc. and Reported MoietyFormula Strings Differ |       | Please Check |
| PLAT906_ALERT_3_C | Large K Value in the Analysis of Variance       | ..... | 2.001 Check  |
| PLAT911_ALERT_3_C | Missing FCF Refl Between Thmin & STh/L=         | 0.600 | 19 Report    |
| PLAT977_ALERT_2_C | Check Negative Difference Density on H2A        | .     | -0.31 eA-3   |

[illegible]

[illegible]

|                   |                                                  |                |        |       |
|-------------------|--------------------------------------------------|----------------|--------|-------|
| PLAT300_ALERT_4_G | Atom Site Occupancy of H6B                       | Constrained at | 0.5    | Check |
| PLAT300_ALERT_4_G | Atom Site Occupancy of H7A                       | Constrained at | 0.5    | Check |
| PLAT300_ALERT_4_G | Atom Site Occupancy of H7B                       | Constrained at | 0.5    | Check |
| PLAT300_ALERT_4_G | Atom Site Occupancy of N11                       | Constrained at | 0.5    | Check |
| PLAT300_ALERT_4_G | Atom Site Occupancy of N12                       | Constrained at | 0.5    | Check |
| PLAT300_ALERT_4_G | Atom Site Occupancy of N13                       | Constrained at | 0.5    | Check |
| PLAT300_ALERT_4_G | Atom Site Occupancy of C11                       | Constrained at | 0.5    | Check |
| PLAT300_ALERT_4_G | Atom Site Occupancy of C12                       | Constrained at | 0.5    | Check |
| PLAT300_ALERT_4_G | Atom Site Occupancy of C13                       | Constrained at | 0.5    | Check |
| PLAT300_ALERT_4_G | Atom Site Occupancy of C14                       | Constrained at | 0.5    | Check |
| PLAT300_ALERT_4_G | Atom Site Occupancy of C15                       | Constrained at | 0.5    | Check |
| PLAT300_ALERT_4_G | Atom Site Occupancy of C16                       | Constrained at | 0.5    | Check |
| PLAT300_ALERT_4_G | Atom Site Occupancy of C17                       | Constrained at | 0.5    | Check |
| PLAT300_ALERT_4_G | Atom Site Occupancy of H12                       | Constrained at | 0.5    | Check |
| PLAT300_ALERT_4_G | Atom Site Occupancy of H12A                      | Constrained at | 0.5    | Check |
| PLAT300_ALERT_4_G | Atom Site Occupancy of H12B                      | Constrained at | 0.5    | Check |
| PLAT300_ALERT_4_G | Atom Site Occupancy of H13                       | Constrained at | 0.5    | Check |
| PLAT300_ALERT_4_G | Atom Site Occupancy of H13A                      | Constrained at | 0.5    | Check |
| PLAT300_ALERT_4_G | Atom Site Occupancy of H13B                      | Constrained at | 0.5    | Check |
| PLAT300_ALERT_4_G | Atom Site Occupancy of H14A                      | Constrained at | 0.5    | Check |
| PLAT300_ALERT_4_G | Atom Site Occupancy of H14B                      | Constrained at | 0.5    | Check |
| PLAT300_ALERT_4_G | Atom Site Occupancy of H15A                      | Constrained at | 0.5    | Check |
| PLAT300_ALERT_4_G | Atom Site Occupancy of H15B                      | Constrained at | 0.5    | Check |
| PLAT300_ALERT_4_G | Atom Site Occupancy of H16A                      | Constrained at | 0.5    | Check |
| PLAT300_ALERT_4_G | Atom Site Occupancy of H16B                      | Constrained at | 0.5    | Check |
| PLAT300_ALERT_4_G | Atom Site Occupancy of H17A                      | Constrained at | 0.5    | Check |
| PLAT300_ALERT_4_G | Atom Site Occupancy of H17B                      | Constrained at | 0.5    | Check |
| PLAT301_ALERT_3_G | Main Residue Disorder .....(Resd 1 )             |                | 100%   | Note  |
| PLAT302_ALERT_4_G | Anion/Solvent/Minor-Residue Disorder (Resd 2 )   |                | 100%   | Note  |
| PLAT302_ALERT_4_G | Anion/Solvent/Minor-Residue Disorder (Resd 3 )   |                | 100%   | Note  |
| PLAT302_ALERT_4_G | Anion/Solvent/Minor-Residue Disorder (Resd 4 )   |                | 100%   | Note  |
| PLAT304_ALERT_4_G | Non-Integer Number of Atoms in ..... (Resd 2 )   |                | 9.50   | Check |
| PLAT802_ALERT_4_G | CIF Input Record(s) with more than 80 Characters |                | 1      | Info  |
| PLAT860_ALERT_3_G | Number of Least-Squares Restraints .....         |                | 1234   | Note  |
| PLAT883_ALERT_1_G | No Info/Value for _atom_sites_solution_primary . |                | Please | Do !  |
| PLAT912_ALERT_4_G | Missing # of FCF Reflections Above STh/L= 0.600  |                | 3      | Note  |
| PLAT913_ALERT_3_G | Missing # of Very Strong Reflections in FCF .... |                | 3      | Note  |
| PLAT941_ALERT_3_G | Average HKL Measurement Multiplicity .....       |                | 4.7    | Low   |

---

0 **ALERT level A** = Most likely a serious problem - resolve or explain  
 1 **ALERT level B** = A potentially serious problem, consider carefully  
 4 **ALERT level C** = Check. Ensure it is not caused by an omission or oversight  
 133 **ALERT level G** = General information/check it is not something unexpected

3 ALERT type 1 CIF construction/syntax error, inconsistent or missing data  
 4 ALERT type 2 Indicator that the structure model may be wrong or deficient  
 33 ALERT type 3 Indicator that the structure quality may be low  
 97 ALERT type 4 Improvement, methodology, query or suggestion  
 1 ALERT type 5 Informative message, check

---

It is advisable to attempt to resolve as many as possible of the alerts in all categories. Often the minor alerts point to easily fixed oversights, errors and omissions in your CIF or refinement strategy, so attention to these fine details can be worthwhile. In order to resolve some of the more serious problems it may be necessary to carry out additional measurements or structure refinements. However, the purpose of your study may justify the reported deviations and the more serious of these should normally be commented upon in the discussion or experimental section of a paper or in the "special\_details" fields of the CIF. checkCIF was carefully designed to identify outliers and unusual parameters, but every test has its limitations and alerts that are not important in a particular case may appear. Conversely, the absence of alerts does not guarantee there are no aspects of the results needing attention. It is up to the individual to critically assess their own results and, if necessary, seek expert advice.

### **Publication of your CIF in IUCr journals**

A basic structural check has been run on your CIF. These basic checks will be run on all CIFs submitted for publication in IUCr journals (*Acta Crystallographica*, *Journal of Applied Crystallography*, *Journal of Synchrotron Radiation*); however, if you intend to submit to *Acta Crystallographica Section C* or *E* or *IUCrData*, you should make sure that full publication checks are run on the final version of your CIF prior to submission.

### **Publication of your CIF in other journals**

Please refer to the *Notes for Authors* of the relevant journal for any special instructions relating to CIF submission.
