# Supplementary material for: Structural (XRD) Characterization and an Analysis of H-Bonding Motifs in Some Tetrahydroxidohexaoxidopentaborate(1-) Salts of N-Substituted Guanidinium Cations
Source: Molecules. 2023 Apr 6;28(7):3273. doi: 10.3390/molecules28073273 (PMC10096507; doi:10.3390/molecules28073273)
Supplement: Supplementary file 1 [file molecules-28-03273-s001.zip]

Archive with 13 entries (13 files):
- MAB1.cif
- MAB1_checkcif.pdf
- MAB2.cif
- MAB2_checkcif.pdf
- MAB3.cif
- MAB3_checkcif.pdf
- MAB4.cif
- MAB4_checkcif.pdf
- MAB5.cif
- MAB5_checkcif.pdf
- MAB6.cif
- MAB6_checkcif.pdf
- Supplementary X-ray Data Revised proofed.pdf
