# Supplementary material for: Structural (XRD) Characterization and an Analysis of H-Bonding Motifs in Some Tetrahydroxidohexaoxidopentaborate(1-) Salts of N-Substituted Guanidinium Cations
Source: Molecules. 2023 Apr 6;28(7):3273. doi: 10.3390/molecules28073273 (PMC10096507; doi:10.3390/molecules28073273)
Supplement: Supplementary file 1 [file molecules-28-03273-s001.zip › MAB1.cif]

data_MAB1

#2019ncsx0350b_1b

_audit_creation_date               2019-11-21
_audit_creation_method
;
Olex2 1.3
(compiled 2019.09.11 svn.r3662 for OlexSys, GUI svn.r5938)
;
_shelx_SHELXL_version_number       '2018/3'
loop_
  _audit_author_name
  _audit_author_email
  _audit_author_address
 'Beckett, M.A.' ''
;
Bangor University
School of Chemistry
Bangor
LL57 2UW
UK
;
 'Horton, P.N.' pnh@soton.ac.uk
;
University of Southampton
Chemistry
Southampton
SO17 1BJ
UK
;

_audit_contact_author_address      ?
_audit_contact_author_email        ?
_audit_contact_author_name         ''
_audit_contact_author_phone        ?
_publ_contact_author_id_orcid      ?
_publ_section_references
;
Dolomanov, O.V., Bourhis, L.J., Gildea, R.J, Howard, J.A.K. & Puschmann, H.
 (2009), J. Appl. Cryst. 42, 339-341.

Sheldrick, G.M. (2015). Acta Cryst. A71, 3-8.

Sheldrick, G.M. (2015). Acta Cryst. C71, 3-8.
;
_chemical_name_common              ?
_chemical_name_systematic          ?
_chemical_formula_moiety           'B5 H4 O10, H2 O, C2 H8 N3'
_chemical_formula_sum              'C2 H14 B5 N3 O11'
_chemical_formula_weight           310.21
_chemical_melting_point            ?
_chemical_oxdiff_formula           'C8 H48 B20 N12 O40 '
_chemical_oxdiff_usercomment       'MAB/TR/MeGuanB5 (block)'
loop_
  _atom_type_symbol
  _atom_type_description
  _atom_type_scat_dispersion_real
  _atom_type_scat_dispersion_imag
  _atom_type_scat_source
 'C' 'C' 0.0033 0.0016 'International Tables Vol C Tables 4.2.6.8 and 6.1.1.4'
 'H' 'H' 0.0000 0.0000 'International Tables Vol C Tables 4.2.6.8 and 6.1.1.4'
 'B' 'B' 0.0013 0.0007 'International Tables Vol C Tables 4.2.6.8 and 6.1.1.4'
 'N' 'N' 0.0061 0.0033 'International Tables Vol C Tables 4.2.6.8 and 6.1.1.4'
 'O' 'O' 0.0106 0.0060 'International Tables Vol C Tables 4.2.6.8 and 6.1.1.4'

_shelx_space_group_comment
;
The symmetry employed for this shelxl refinement is uniquely defined
by the following loop, which should always be used as a source of
symmetry information in preference to the above space-group names.
They are only intended as comments.
;
_space_group_crystal_system        'monoclinic'
_space_group_IT_number             14
_space_group_name_H-M_alt          'P 1 21/c 1'
_space_group_name_Hall             '-P 2ybc'
loop_
  _space_group_symop_operation_xyz
 'x, y, z'
 '-x, y+1/2, -z+1/2'
 '-x, -y, -z'
 'x, -y-1/2, z-1/2'

_cell_length_a                     9.9962(2)
_cell_length_b                     10.9047(2)
_cell_length_c                     11.7215(2)
_cell_angle_alpha                  90
_cell_angle_beta                   96.101(2)
_cell_angle_gamma                  90
_cell_volume                       1270.47(4)
_cell_formula_units_Z              4
_cell_measurement_reflns_used      14324
_cell_measurement_temperature      100(2)
_cell_measurement_theta_max        31.5450
_cell_measurement_theta_min        2.4940
_shelx_estimated_absorpt_T_max     0.970
_shelx_estimated_absorpt_T_min     0.942
_exptl_absorpt_coefficient_mu      0.151
_exptl_absorpt_correction_T_max    1.00000
_exptl_absorpt_correction_T_min    0.94687
_exptl_absorpt_correction_type     multi-scan
_exptl_absorpt_process_details
;
CrysAlisPro 1.171.40.53 (Rigaku Oxford Diffraction, 2019)
Empirical absorption correction using spherical harmonics,
 implemented in SCALE3 ABSPACK scaling algorithm.
;
_exptl_absorpt_special_details     ?
_exptl_crystal_colour              colourless
_exptl_crystal_colour_primary      colourless
_exptl_crystal_density_diffrn      1.622
_exptl_crystal_density_meas        ?
_exptl_crystal_density_method      ?
_exptl_crystal_description         block
_exptl_crystal_F_000               640
_exptl_crystal_recrystallization_method 
 'The material was recrystallised from water'
_exptl_crystal_size_max            0.4
_exptl_crystal_size_mid            0.4
_exptl_crystal_size_min            0.2
_exptl_transmission_factor_max     ?
_exptl_transmission_factor_min     ?
_diffrn_reflns_av_R_equivalents    0.0115
_diffrn_reflns_av_unetI/netI       0.0071
_diffrn_reflns_Laue_measured_fraction_full  0.992
_diffrn_reflns_Laue_measured_fraction_max  0.993
_diffrn_reflns_limit_h_max         12
_diffrn_reflns_limit_h_min         -12
_diffrn_reflns_limit_k_max         14
_diffrn_reflns_limit_k_min         -14
_diffrn_reflns_limit_l_max         15
_diffrn_reflns_limit_l_min         -15
_diffrn_reflns_number              17592
_diffrn_reflns_point_group_measured_fraction_full  0.992
_diffrn_reflns_point_group_measured_fraction_max  0.993
_diffrn_reflns_theta_full          25.242
_diffrn_reflns_theta_max           27.485
_diffrn_reflns_theta_min           2.558
_diffrn_ambient_temperature        100(2)
_diffrn_detector                   'hybrid pixel detector'
_diffrn_detector_area_resol_mean   10
_diffrn_detector_dtime             0.000
_diffrn_detector_type              'Rigaku, HyPix 6000'
_diffrn_measured_fraction_theta_full  0.992
_diffrn_measured_fraction_theta_max  0.993
_diffrn_measurement_details
;
List of Runs (angles in degrees, time in seconds):

  # Type    Start    End  Width  t~exp~   \w     \q     \k     \f   Frames
--------------------------------------------------------------------------
  1  \w    -84.00  36.00   0.50    0.50    --    5.00 -57.00-150.00  240
  2  \w    -39.00  82.00   0.50    0.50    --   -7.80  57.00  30.00  242
  3  \w    -40.00  82.00   0.50    0.50    --   -7.80  60.00  90.00  244
  4  \w    -84.00  -7.00   0.50    0.50    --    5.00 -38.00 -60.00  154
;
_diffrn_measurement_device         'four-circle diffractometer'
_diffrn_measurement_device_details  'Rigaku, AFC12 \k goniometer'
_diffrn_measurement_device_type   
 'Rigaku FRE+ equipped with VHF Varimax confocal mirrors and an AFC12 goniometer and HyPix 6000 detector'
_diffrn_measurement_method         'profile data from \w-scans'
_diffrn_measurement_specimen_support  'MiTeGen MicroLoop'
_diffrn_orient_matrix_type        
 'CrysAlisPro convention (1999,Acta A55,543-557)'
_diffrn_orient_matrix_UB_11        -0.0306273000
_diffrn_orient_matrix_UB_12        -0.0401169000
_diffrn_orient_matrix_UB_13        -0.0427545000
_diffrn_orient_matrix_UB_21        0.0640164000
_diffrn_orient_matrix_UB_22        -0.0133100000
_diffrn_orient_matrix_UB_23        -0.0179177000
_diffrn_orient_matrix_UB_31        0.0075552000
_diffrn_orient_matrix_UB_32        -0.0494661000
_diffrn_orient_matrix_UB_33        0.0393900000
_diffrn_radiation_collimation      0.2
_diffrn_radiation_monochromator    'Confocal mirrors, VHF Varimax'
_diffrn_radiation_probe            x-ray
_diffrn_radiation_type             'Mo K\a'
_diffrn_radiation_wavelength       0.71075
_diffrn_radiation_xray_symbol      K-L~3~
_diffrn_source                     'Rotating Anode'
_diffrn_source_current             55.0
_diffrn_source_power               2.475
_diffrn_source_target              Mo
_diffrn_source_type                'Rigaku FRE+'
_diffrn_source_voltage             45.0
_reflns_Friedel_coverage           0.000
_reflns_Friedel_fraction_full      .
_reflns_Friedel_fraction_max       .
_reflns_number_gt                  2810
_reflns_number_total               2893
_reflns_odcompleteness_completeness  99.25
_reflns_odcompleteness_iscentric   1
_reflns_odcompleteness_theta       27.42
_reflns_special_details
;
 Reflections were merged by SHELXL according to the crystal
 class for the calculation of statistics and refinement.
 
 _reflns_Friedel_fraction is defined as the number of unique
 Friedel pairs measured divided by the number that would be
 possible theoretically, ignoring centric projections and
 systematic absences.
;
_reflns_threshold_expression       'I > 2\s(I)'
_computing_cell_refinement         'CrysAlisPro 1.171.40.53 (Rigaku OD, 2019)'
_computing_data_collection         'CrysAlisPro 1.171.40.53 (Rigaku OD, 2019)'
_computing_data_reduction          'CrysAlisPro 1.171.40.53 (Rigaku OD, 2019)'
_computing_molecular_graphics      'Olex2 1.3 (Dolomanov et al., 2009)'
_computing_publication_material    'Olex2 1.3 (Dolomanov et al., 2009)'
_computing_structure_refinement    'ShelXL 2018/3 (Sheldrick, 2015)'
_computing_structure_solution      'SHELXT 2018/2 (Sheldrick, 2018)'
_refine_diff_density_max           0.246
_refine_diff_density_min           -0.233
_refine_diff_density_rms           0.040
_refine_ls_extinction_coef         .
_refine_ls_extinction_method       none
_refine_ls_goodness_of_fit_ref     1.071
_refine_ls_hydrogen_treatment      mixed
_refine_ls_matrix_type             full
_refine_ls_number_parameters       235
_refine_ls_number_reflns           2893
_refine_ls_number_restraints       0
_refine_ls_R_factor_all            0.0275
_refine_ls_R_factor_gt             0.0267
_refine_ls_restrained_S_all        1.071
_refine_ls_shift/su_max            0.000
_refine_ls_shift/su_mean           0.000
_refine_ls_structure_factor_coef   Fsqd
_refine_ls_weighting_details      
 'w=1/[\s^2^(Fo^2^)+(0.0414P)^2^+0.4187P] where P=(Fo^2^+2Fc^2^)/3'
_refine_ls_weighting_scheme        calc
_refine_ls_wR_factor_gt            0.0737
_refine_ls_wR_factor_ref           0.0743
_refine_special_details            ?
_olex2_refinement_description
;
1. Fixed Uiso
 At 1.5 times of:
  All C(H,H,H) groups
2.a Idealised Me refined as rotating group:
 C2(H2C,H2D,H2E)
;
_atom_sites_solution_hydrogens     mixed
_atom_sites_solution_primary       dual
_atom_sites_solution_secondary     ?
loop_
  _atom_site_label
  _atom_site_type_symbol
  _atom_site_fract_x
  _atom_site_fract_y
  _atom_site_fract_z
  _atom_site_U_iso_or_equiv
  _atom_site_adp_type
  _atom_site_occupancy
  _atom_site_site_symmetry_order
  _atom_site_calc_flag
  _atom_site_refinement_flags_posn
  _atom_site_refinement_flags_adp
  _atom_site_refinement_flags_occupancy
  _atom_site_disorder_assembly
  _atom_site_disorder_group
 O1 O 0.05353(6) 0.64527(6) 0.22825(5) 0.01094(14) Uani 1 1 d . . . . .
 O2 O -0.09449(6) 0.53081(6) 0.09368(5) 0.01212(14) Uani 1 1 d . . . . .
 O3 O 0.07488(6) 0.42421(6) 0.21436(5) 0.01014(14) Uani 1 1 d . . . . .
 O4 O 0.26855(6) 0.55018(6) 0.26571(5) 0.01037(14) Uani 1 1 d . . . . .
 O5 O 0.33137(6) 0.50787(6) 0.46442(5) 0.01239(14) Uani 1 1 d . . . . .
 O6 O 0.09835(6) 0.52429(6) 0.39602(5) 0.01069(14) Uani 1 1 d . . . . .
 O7 O -0.14338(6) 0.73568(6) 0.13245(6) 0.01404(15) Uani 1 1 d . . . . .
 H7 H -0.1194(16) 0.7943(15) 0.1771(14) 0.033(4) Uiso 1 1 d . . . . .
 O8 O -0.06754(7) 0.32045(6) 0.06839(6) 0.01597(15) Uani 1 1 d . . . . .
 H8 H -0.0360(16) 0.2543(16) 0.1011(14) 0.036(4) Uiso 1 1 d . . . . .
 O9 O 0.49581(6) 0.53345(6) 0.33328(6) 0.01399(15) Uani 1 1 d . . . . .
 H9 H 0.5443(17) 0.5197(15) 0.3934(15) 0.038(4) Uiso 1 1 d . . . . .
 O10 O 0.16992(6) 0.49072(7) 0.59368(5) 0.01375(15) Uani 1 1 d . . . . .
 H10 H 0.0851(18) 0.4890(16) 0.5983(14) 0.039(4) Uiso 1 1 d . . . . .
 B1 B 0.12442(9) 0.53638(9) 0.27404(8) 0.00919(18) Uani 1 1 d . . . . .
 B2 B -0.05820(9) 0.63834(9) 0.15108(8) 0.01058(19) Uani 1 1 d . . . . .
 B3 B -0.02593(10) 0.42436(9) 0.12667(8) 0.01108(19) Uani 1 1 d . . . . .
 B4 B 0.36466(10) 0.53063(9) 0.35371(8) 0.01017(18) Uani 1 1 d . . . . .
 B5 B 0.19651(10) 0.50757(9) 0.48339(8) 0.01046(19) Uani 1 1 d . . . . .
 O11 O 0.28065(8) 0.83216(8) 0.25674(7) 0.02606(19) Uani 1 1 d . . . . .
 H11A H 0.2541(16) 0.8896(16) 0.2062(14) 0.039(4) Uiso 1 1 d . . . . .
 H11B H 0.2191(18) 0.7746(19) 0.2401(15) 0.051(5) Uiso 1 1 d . . . . .
 N1 N 0.50960(8) 0.82411(8) 0.42075(7) 0.01488(17) Uani 1 1 d . . . . .
 H1 H 0.4438(15) 0.8257(14) 0.3626(13) 0.028(4) Uiso 1 1 d . . . . .
 N2 N 0.35064(8) 0.87618(9) 0.54005(7) 0.01774(18) Uani 1 1 d . . . . .
 H2A H 0.3297(14) 0.8904(13) 0.6089(12) 0.024(3) Uiso 1 1 d . . . . .
 H2B H 0.2915(15) 0.8721(14) 0.4815(13) 0.029(4) Uiso 1 1 d . . . . .
 N3 N 0.57136(8) 0.85245(8) 0.61494(7) 0.01586(17) Uani 1 1 d . . . . .
 H3A H 0.6561(15) 0.8351(14) 0.6063(12) 0.027(3) Uiso 1 1 d . . . . .
 H3B H 0.5488(13) 0.8800(13) 0.6799(12) 0.023(3) Uiso 1 1 d . . . . .
 C1 C 0.47756(9) 0.85071(8) 0.52504(8) 0.01274(18) Uani 1 1 d . . . . .
 C2 C 0.64733(9) 0.80453(9) 0.39472(8) 0.01604(19) Uani 1 1 d . . . . .
 H2C H 0.681645 0.727673 0.429940 0.024 Uiso 1 1 calc R U . . .
 H2D H 0.703908 0.872844 0.425318 0.024 Uiso 1 1 calc R U . . .
 H2E H 0.649049 0.799896 0.311393 0.024 Uiso 1 1 calc R U . . .

loop_
  _atom_site_aniso_label
  _atom_site_aniso_U_11
  _atom_site_aniso_U_22
  _atom_site_aniso_U_33
  _atom_site_aniso_U_23
  _atom_site_aniso_U_13
  _atom_site_aniso_U_12
 O1 0.0103(3) 0.0094(3) 0.0122(3) -0.0004(2) -0.0031(2) 0.0004(2)
 O2 0.0118(3) 0.0110(3) 0.0124(3) -0.0005(2) -0.0039(2) 0.0004(2)
 O3 0.0099(3) 0.0089(3) 0.0110(3) 0.0003(2) -0.0018(2) -0.0001(2)
 O4 0.0077(3) 0.0143(3) 0.0089(3) 0.0014(2) -0.0001(2) -0.0005(2)
 O5 0.0070(3) 0.0207(3) 0.0091(3) 0.0019(2) -0.0006(2) 0.0004(2)
 O6 0.0068(3) 0.0164(3) 0.0087(3) 0.0001(2) 0.0002(2) 0.0002(2)
 O7 0.0126(3) 0.0113(3) 0.0169(3) -0.0024(3) -0.0050(2) 0.0021(2)
 O8 0.0178(3) 0.0111(3) 0.0173(3) -0.0006(3) -0.0056(3) -0.0002(3)
 O9 0.0077(3) 0.0235(4) 0.0105(3) 0.0027(3) -0.0004(2) 0.0000(2)
 O10 0.0080(3) 0.0237(4) 0.0094(3) 0.0006(2) 0.0003(2) -0.0004(2)
 B1 0.0076(4) 0.0108(4) 0.0088(4) 0.0003(3) -0.0009(3) -0.0002(3)
 B2 0.0094(4) 0.0120(4) 0.0101(4) 0.0014(3) 0.0000(3) -0.0003(3)
 B3 0.0108(4) 0.0119(5) 0.0105(4) 0.0009(3) 0.0009(3) -0.0010(3)
 B4 0.0094(4) 0.0102(4) 0.0107(4) 0.0001(3) 0.0004(3) -0.0002(3)
 B5 0.0086(4) 0.0119(4) 0.0107(4) -0.0006(3) 0.0000(3) 0.0000(3)
 O11 0.0258(4) 0.0226(4) 0.0268(4) 0.0091(3) -0.0111(3) -0.0083(3)
 N1 0.0134(4) 0.0195(4) 0.0112(4) -0.0016(3) -0.0009(3) 0.0025(3)
 N2 0.0112(4) 0.0278(5) 0.0138(4) -0.0027(3) -0.0009(3) 0.0032(3)
 N3 0.0107(4) 0.0252(4) 0.0115(4) -0.0015(3) 0.0001(3) 0.0026(3)
 C1 0.0129(4) 0.0121(4) 0.0130(4) 0.0008(3) 0.0003(3) 0.0001(3)
 C2 0.0157(4) 0.0183(4) 0.0145(4) -0.0009(3) 0.0036(3) 0.0014(3)

_geom_special_details
;
 All esds (except the esd in the dihedral angle between two l.s. planes)
 are estimated using the full covariance matrix.  The cell esds are taken
 into account individually in the estimation of esds in distances, angles
 and torsion angles; correlations between esds in cell parameters are only
 used when they are defined by crystal symmetry.  An approximate (isotropic)
 treatment of cell esds is used for estimating esds involving l.s. planes.
;
loop_
  _geom_bond_atom_site_label_1
  _geom_bond_atom_site_label_2
  _geom_bond_distance
  _geom_bond_site_symmetry_2
  _geom_bond_publ_flag
 O1 B1 1.4558(11) . ?
 O1 B2 1.3626(11) . ?
 O2 B2 1.3811(11) . ?
 O2 B3 1.3821(12) . ?
 O3 B1 1.4687(11) . ?
 O3 B3 1.3608(11) . ?
 O4 B1 1.4622(10) . ?
 O4 B4 1.3497(11) . ?
 O5 B4 1.3958(11) . ?
 O5 B5 1.3895(11) . ?
 O6 B1 1.4862(11) . ?
 O6 B5 1.3532(11) . ?
 O7 H7 0.845(17) . ?
 O7 B2 1.3637(11) . ?
 O8 H8 0.861(17) . ?
 O8 B3 1.3651(12) . ?
 O9 H9 0.825(17) . ?
 O9 B4 1.3578(11) . ?
 O10 H10 0.855(18) . ?
 O10 B5 1.3597(11) . ?
 O11 H11A 0.883(18) . ?
 O11 H11B 0.89(2) . ?
 N1 H1 0.895(15) . ?
 N1 C1 1.3282(12) . ?
 N1 C2 1.4572(12) . ?
 N2 H2A 0.868(14) . ?
 N2 H2B 0.858(15) . ?
 N2 C1 1.3286(12) . ?
 N3 H3A 0.884(15) . ?
 N3 H3B 0.870(14) . ?
 N3 C1 1.3342(12) . ?
 C2 H2C 0.9800 . ?
 C2 H2D 0.9800 . ?
 C2 H2E 0.9800 . ?

loop_
  _geom_angle_atom_site_label_1
  _geom_angle_atom_site_label_2
  _geom_angle_atom_site_label_3
  _geom_angle
  _geom_angle_site_symmetry_1
  _geom_angle_site_symmetry_3
  _geom_angle_publ_flag
 B2 O1 B1 122.15(7) . . ?
 B2 O2 B3 118.68(7) . . ?
 B3 O3 B1 122.94(7) . . ?
 B4 O4 B1 124.00(7) . . ?
 B5 O5 B4 118.72(7) . . ?
 B5 O6 B1 123.57(7) . . ?
 B2 O7 H7 111.0(11) . . ?
 B3 O8 H8 113.2(11) . . ?
 B4 O9 H9 109.6(12) . . ?
 B5 O10 H10 111.0(11) . . ?
 O1 B1 O3 112.18(7) . . ?
 O1 B1 O4 109.63(7) . . ?
 O1 B1 O6 107.38(7) . . ?
 O3 B1 O6 107.44(7) . . ?
 O4 B1 O3 109.80(7) . . ?
 O4 B1 O6 110.37(7) . . ?
 O1 B2 O2 121.66(8) . . ?
 O1 B2 O7 121.13(8) . . ?
 O7 B2 O2 117.10(8) . . ?
 O3 B3 O2 121.18(8) . . ?
 O3 B3 O8 122.60(8) . . ?
 O8 B3 O2 116.20(8) . . ?
 O4 B4 O5 121.19(8) . . ?
 O4 B4 O9 118.94(8) . . ?
 O9 B4 O5 119.87(8) . . ?
 O6 B5 O5 121.09(8) . . ?
 O6 B5 O10 122.58(8) . . ?
 O10 B5 O5 116.33(8) . . ?
 H11A O11 H11B 101.7(15) . . ?
 C1 N1 H1 117.9(9) . . ?
 C1 N1 C2 123.39(8) . . ?
 C2 N1 H1 118.5(9) . . ?
 H2A N2 H2B 122.6(13) . . ?
 C1 N2 H2A 119.2(9) . . ?
 C1 N2 H2B 118.0(10) . . ?
 H3A N3 H3B 121.0(12) . . ?
 C1 N3 H3A 120.5(9) . . ?
 C1 N3 H3B 118.1(9) . . ?
 N1 C1 N2 119.65(8) . . ?
 N1 C1 N3 120.80(8) . . ?
 N2 C1 N3 119.55(8) . . ?
 N1 C2 H2C 109.5 . . ?
 N1 C2 H2D 109.5 . . ?
 N1 C2 H2E 109.5 . . ?
 H2C C2 H2D 109.5 . . ?
 H2C C2 H2E 109.5 . . ?
 H2D C2 H2E 109.5 . . ?

loop_
  _geom_hbond_atom_site_label_D
  _geom_hbond_atom_site_label_H
  _geom_hbond_atom_site_label_A
  _geom_hbond_distance_DH
  _geom_hbond_distance_HA
  _geom_hbond_distance_DA
  _geom_hbond_angle_DHA
  _geom_hbond_site_symmetry_A
  _geom_hbond_publ_flag
 O7 H7 O3 0.845(17) 1.924(17) 2.7674(9) 175.8(16) 2 yes
 O8 H8 O1 0.861(17) 2.350(17) 3.0462(9) 138.3(14) 2_545 yes
 O9 H9 O5 0.825(17) 1.994(18) 2.8177(9) 177.0(17) 3_666 yes
 O10 H10 O6 0.855(18) 1.848(18) 2.7022(9) 176.4(17) 3_566 yes
 O11 H11A O10 0.883(18) 1.979(18) 2.8564(10) 172.3(15) 4_575 yes
 O11 H11B O1 0.89(2) 2.17(2) 3.0428(10) 169.2(16) . yes
 O11 H11B O4 0.89(2) 2.51(2) 3.0795(10) 122.8(15) . yes
 N1 H1 O11 0.895(15) 1.943(15) 2.8295(11) 170.2(14) . yes
 N2 H2A O4 0.868(14) 2.101(15) 2.9624(10) 171.5(13) 4_576 yes
 N2 H2B O8 0.858(15) 2.322(15) 3.0379(11) 141.1(13) 2 yes
 N3 H3A O7 0.884(15) 2.140(15) 2.9954(10) 162.8(13) 4_676 yes
 N3 H3B O9 0.870(14) 2.146(15) 3.0132(10) 174.1(13) 4_576 yes

loop_
  _geom_torsion_atom_site_label_1
  _geom_torsion_atom_site_label_2
  _geom_torsion_atom_site_label_3
  _geom_torsion_atom_site_label_4
  _geom_torsion
  _geom_torsion_site_symmetry_1
  _geom_torsion_site_symmetry_2
  _geom_torsion_site_symmetry_3
  _geom_torsion_site_symmetry_4
  _geom_torsion_publ_flag
 B1 O1 B2 O2 -13.84(13) . . . . ?
 B1 O1 B2 O7 162.17(8) . . . . ?
 B1 O3 B3 O2 -4.55(12) . . . . ?
 B1 O3 B3 O8 177.13(8) . . . . ?
 B1 O4 B4 O5 -6.99(13) . . . . ?
 B1 O4 B4 O9 173.07(8) . . . . ?
 B1 O6 B5 O5 3.89(13) . . . . ?
 B1 O6 B5 O10 -176.69(8) . . . . ?
 B2 O1 B1 O3 9.07(11) . . . . ?
 B2 O1 B1 O4 131.33(8) . . . . ?
 B2 O1 B1 O6 -108.75(8) . . . . ?
 B2 O2 B3 O3 0.46(13) . . . . ?
 B2 O2 B3 O8 178.88(7) . . . . ?
 B3 O2 B2 O1 8.68(13) . . . . ?
 B3 O2 B2 O7 -167.49(8) . . . . ?
 B3 O3 B1 O1 -0.07(11) . . . . ?
 B3 O3 B1 O4 -122.23(8) . . . . ?
 B3 O3 B1 O6 117.72(8) . . . . ?
 B4 O4 B1 O1 129.99(8) . . . . ?
 B4 O4 B1 O3 -106.35(9) . . . . ?
 B4 O4 B1 O6 11.91(11) . . . . ?
 B4 O5 B5 O6 2.48(13) . . . . ?
 B4 O5 B5 O10 -176.98(8) . . . . ?
 B5 O5 B4 O4 -1.03(13) . . . . ?
 B5 O5 B4 O9 178.91(8) . . . . ?
 B5 O6 B1 O1 -129.81(8) . . . . ?
 B5 O6 B1 O3 109.33(9) . . . . ?
 B5 O6 B1 O4 -10.36(11) . . . . ?
 C2 N1 C1 N2 175.01(9) . . . . ?
 C2 N1 C1 N3 -4.83(14) . . . . ?

_shelx_res_file
;
TITL 2019ncsx0350b_1b_a.res in P2(1)/c
    2019ncsx0350b_1b.res
    created by SHELXL-2018/3 at 11:14:59 on 21-Nov-2019
REM Old TITL 2019NCSX0350b_1b in P2(1)/c
REM SHELXT solution in P2(1)/c: R1 0.104, Rweak 0.033, Alpha 0.021
REM <I/s> 1.989 for 147 systematic absences, Orientation as input
REM Formula found by SHELXT: C7 B N O12
CELL 0.71075 9.9962 10.9047 11.7215 90 96.101 90
ZERR 4 0.0002 0.0002 0.0002 0 0.002 0
LATT 1
SYMM -X,0.5+Y,0.5-Z
SFAC C H B N O
UNIT 8 56 20 12 44
EQIV $1 -X,1-Y,1-Z
EQIV $2 1-X,1-Y,1-Z
EQIV $3 -X,0.5+Y,0.5-Z
EQIV $4 +X,1.5-Y,-0.5+Z
EQIV $5 -X,-0.5+Y,0.5-Z
EQIV $6 +X,1.5-Y,0.5+Z
EQIV $7 1+X,1.5-Y,0.5+Z

L.S. 10
PLAN  5
SIZE 0.2 0.4 0.4
TEMP -173
CONF
HTAB O10 O6_$1
HTAB O9 O5_$2
HTAB O7 O3_$3
HTAB O8 O1_$5
HTAB O11 O4
HTAB O11 O1
HTAB O11 O10_$4
HTAB N1 O11
HTAB N3 O9_$6
HTAB N3 O7_$7
HTAB N2 O4_$6
HTAB N2 O8_$3
MORE -1
BOND $H
fmap 2 53
acta
REM <olex2.extras>
REM <HklSrc "%.\\2019NCSX0350b_1b.hkl">
REM </olex2.extras>

WGHT    0.041400    0.418700
FVAR       0.90193
O1    5    0.053527    0.645266    0.228253    11.00000    0.01026    0.00944 =
         0.01219   -0.00037   -0.00310    0.00037
O2    5   -0.094493    0.530806    0.093680    11.00000    0.01182    0.01102 =
         0.01242   -0.00047   -0.00389    0.00045
O3    5    0.074881    0.424208    0.214363    11.00000    0.00986    0.00890 =
         0.01102    0.00033   -0.00179   -0.00011
O4    5    0.268551    0.550185    0.265713    11.00000    0.00767    0.01427 =
         0.00894    0.00138   -0.00010   -0.00051
O5    5    0.331370    0.507875    0.464420    11.00000    0.00702    0.02074 =
         0.00910    0.00191   -0.00060    0.00043
O6    5    0.098354    0.524293    0.396016    11.00000    0.00676    0.01643 =
         0.00874    0.00015    0.00020    0.00023
O7    5   -0.143380    0.735676    0.132448    11.00000    0.01256    0.01130 =
         0.01688   -0.00237   -0.00496    0.00206
H7    2   -0.119419    0.794332    0.177113    11.00000    0.03347
O8    5   -0.067545    0.320445    0.068391    11.00000    0.01784    0.01112 =
         0.01734   -0.00059   -0.00565   -0.00025
H8    2   -0.035991    0.254330    0.101104    11.00000    0.03634
O9    5    0.495811    0.533448    0.333279    11.00000    0.00775    0.02346 =
         0.01048    0.00272   -0.00037   -0.00005
H9    2    0.544253    0.519747    0.393381    11.00000    0.03837
O10   5    0.169917    0.490719    0.593683    11.00000    0.00796    0.02372 =
         0.00944    0.00059    0.00032   -0.00044
H10   2    0.085113    0.489016    0.598301    11.00000    0.03925
B1    3    0.124418    0.536376    0.274037    11.00000    0.00762    0.01077 =
         0.00880    0.00026   -0.00088   -0.00019
B2    3   -0.058199    0.638341    0.151078    11.00000    0.00943    0.01197 =
         0.01010    0.00140   -0.00004   -0.00027
B3    3   -0.025926    0.424363    0.126669    11.00000    0.01078    0.01192 =
         0.01049    0.00088    0.00094   -0.00098
B4    3    0.364662    0.530634    0.353708    11.00000    0.00944    0.01021 =
         0.01072    0.00014    0.00038   -0.00020
B5    3    0.196507    0.507565    0.483387    11.00000    0.00860    0.01190 =
         0.01066   -0.00056    0.00003   -0.00004
O11   5    0.280648    0.832161    0.256741    11.00000    0.02576    0.02260 =
         0.02683    0.00905   -0.01113   -0.00826
H11A  2    0.254088    0.889579    0.206246    11.00000    0.03908
H11B  2    0.219108    0.774558    0.240051    11.00000    0.05102
N1    4    0.509597    0.824111    0.420754    11.00000    0.01341    0.01955 =
         0.01121   -0.00156   -0.00090    0.00247
H1    2    0.443838    0.825687    0.362592    11.00000    0.02830
N2    4    0.350639    0.876185    0.540050    11.00000    0.01116    0.02781 =
         0.01378   -0.00273   -0.00091    0.00315
H2A   2    0.329721    0.890369    0.608858    11.00000    0.02369
H2B   2    0.291478    0.872074    0.481474    11.00000    0.02861
N3    4    0.571360    0.852454    0.614938    11.00000    0.01074    0.02516 =
         0.01145   -0.00150    0.00008    0.00265
H3A   2    0.656090    0.835133    0.606283    11.00000    0.02656
H3B   2    0.548824    0.879974    0.679895    11.00000    0.02267
C1    1    0.477559    0.850711    0.525035    11.00000    0.01294    0.01206 =
         0.01296    0.00084    0.00026    0.00014
C2    1    0.647326    0.804528    0.394720    11.00000    0.01570    0.01830 =
         0.01454   -0.00095    0.00361    0.00145
AFIX 137
H2C   2    0.681645    0.727673    0.429940    11.00000   -1.50000
H2D   2    0.703908    0.872844    0.425318    11.00000   -1.50000
H2E   2    0.649049    0.799896    0.311393    11.00000   -1.50000
AFIX   0
HKLF 4


REM  2019ncsx0350b_1b_a.res in P2(1)/c
REM wR2 = 0.0743, GooF = S = 1.071, Restrained GooF = 1.071 for all data
REM R1 = 0.0267 for 2810 Fo > 4sig(Fo) and 0.0275 for all 2893 data
REM 235 parameters refined using 0 restraints

END

WGHT      0.0414      0.4187

REM Highest difference peak  0.246,  deepest hole -0.233,  1-sigma level  0.040
Q1    1   0.0996  0.4789  0.2398  11.00000  0.05    0.25
Q2    1   0.2643  0.5197  0.4715  11.00000  0.05    0.24
Q3    1   0.2015  0.5433  0.2734  11.00000  0.05    0.24
Q4    1   0.4966  0.8439  0.4734  11.00000  0.05    0.23
Q5    1   0.0033  0.6388  0.1887  11.00000  0.05    0.22
;
_shelx_res_checksum                64136
_shelx_hkl_file
;
   0   0  -2    8.35    0.34
   0   0   2    8.77    0.36
   0   0  -2    8.81    0.30
   0   0  -3    0.80    0.18
   0   0  -3    0.78    0.22
   0   0   3    0.43    0.23
   0   0  -4  977.83   10.13
   0   0  -4  967.81   10.37
   0   0  -5    0.62    0.28
   0   0  -5    0.40    0.33
   0   0  -6 6056.82   59.24
   0   0  -7    1.27    0.47
   0   0  -7    0.37    0.34
   0   0   7    0.62    0.20
   0   0  -8 1421.11   15.74
   0   0  -8 1446.30   15.28
   0   0   8 1413.94   14.02
   0   0  -9    0.07    0.60
   0   0   9    0.22    0.20
   0   0  -9    0.40    0.52
   0   0   9    0.31    0.69
   0   0 -10    0.15    0.66
   0   0  10    0.67    0.22
   0   0 -10    0.15    0.53
   0   0  10   -0.44    0.79
   0   0 -11   -0.17    0.75
   0   0  11    0.56    0.14
   0   0  11    0.66    0.15
   0   0 -11   -0.22    0.64
   0   0  11    0.44    0.83
   0   0 -12    1.34    0.68
   0   0  12    1.59    0.97
   0   0 -12    1.18    0.82
   0   0 -13    0.44    0.74
   0   0  13    0.29    1.01
   0   0 -14   75.86    2.37
   0   0  14   77.84    3.04
   0  -1  -1    0.70    0.11
   0  -1  -1    0.34    0.09
   0   1   1    0.27    0.09
   0  -1   1    0.46    0.09
   0  -1  -1    0.58    0.11
   0  -1  -2   64.03    1.09
   0   1   2   63.81    1.08
   0  -1  -2   63.28    0.95
   0   1  -2   62.39    0.86
   0   1  -2   60.73    1.07
   0  -1   2   59.74    1.08
   0  -1  -2   63.68    1.13
   0   1   2   62.30    1.12
   0   1  -3    0.52    0.22
   0   1   3    0.63    0.23
   0  -1  -3    1.18    0.25
   0  -1  -3    0.83    0.22
   0  -1  -4  508.17    6.13
   0   1   4  513.76    6.10
   0  -1  -4  508.53    5.93
   0  -1  -4  525.51    5.35
   0   1  -4  509.56    5.99
   0   1   4  522.22    5.38
   0   1   5  160.95    1.95
   0   1  -5  166.74    2.67
   0   1   5  164.28    2.77
   0  -1  -5  162.23    2.75
   0  -1  -5  165.59    2.59
   0   1   6  250.17    2.74
   0  -1  -6  249.52    3.66
   0   1  -6  250.24    3.76
   0  -1  -6  251.05    3.88
   0   1  -7  346.44    4.86
   0  -1  -7  344.87    5.01
   0  -1   7  337.92    5.04
   0  -1  -7  338.30    4.70
   0   1  -7  343.85    4.48
   0   1   7  328.52    3.44
   0  -1  -8  853.35   10.46
   0   1  -8  864.07   10.31
   0   1   8  862.01    9.13
   0   1  -8  870.22    9.84
   0  -1  -8  865.48   10.12
   0  -1   8  872.38   10.63
   0  -1   9   44.21    1.78
   0   1  -9   44.97    1.67
   0  -1  -9   46.23    1.74
   0   1   9   45.17    1.05
   0   1  -9   46.68    1.48
   0  -1  -9   47.60    1.60
   0   1  10  589.59    8.48
   0  -1  10  595.08    8.46
   0   1 -10  592.94    8.09
   0  -1 -10  589.22    8.24
   0   1  10  598.75    6.50
   0   1 -10  593.68    7.54
   0  -1 -10  585.64    7.77
   0   1  11   52.28    2.20
   0  -1  11   53.22    2.17
   0  -1 -11   51.08    2.04
   0   1 -11   53.39    2.00
   0   1  11   48.48    1.06
   0   1 -11   50.14    1.70
   0  -1 -11   50.83    1.81
   0   1  12   18.81    1.60
   0  -1  12   19.59    1.54
   0  -1 -12   19.97    1.43
   0   1 -12   18.95    1.40
   0   1 -12   18.41    1.15
   0  -1 -12   19.53    1.27
   0   1  12   18.28    0.63
   0   1  13   28.85    0.70
   0  -1 -13   29.59    1.55
   0   1 -13   29.62    1.45
   0  -1  13   31.28    1.95
   0   1  13   28.86    1.93
   0   1 -14   20.35    1.33
   0  -1 -14   20.47    1.41
   0   1  14   18.90    1.72
   0  -1  14   21.38    1.79
   0  -1 -15  340.44    5.79
   0  -1  15  349.20    6.89
   0   2   1  958.57    9.73
   0  -2  -1  942.78    9.77
   0   2   1  949.73    9.76
   0  -2  -1  949.28    9.82
   0   2   1  944.94    9.82
   0   2  -1  964.95    9.76
   0  -2   1  946.31    9.75
   0   2  -1  962.79    9.55
   0   2   2    0.56    0.21
   0  -2  -2    0.33    0.22
   0   2   2    0.35    0.21
   0  -2  -2    0.69    0.22
   0   2  -2    0.57    0.16
   0   2  -2    0.51    0.17
   0   2  -3  150.90    2.27
   0   2  -3  152.36    1.69
   0   2  -3  149.66    2.06
   0  -2  -3  157.55    2.39
   0   2   3  153.55    2.40
   0  -2  -3  151.18    2.15
   0   2  -3  153.04    2.01
   0  -2  -3  159.70    2.37
   0  -2  -4   44.70    1.17
   0   2  -4   43.84    0.84
   0   2   4   44.36    0.98
   0  -2  -4   44.22    1.23
   0   2   4   40.56    1.19
   0  -2  -4   43.24    0.95
   0   2  -4   43.70    1.15
   0  -2  -5  123.20    2.30
   0   2   5  125.23    1.88
   0   2  -5  123.02    1.62
   0  -2  -5  126.24    2.41
   0   2   5  123.68    2.39
   0  -2  -5  125.66    1.84
   0   2  -5  122.20    2.24
   0  -2  -6    6.96    0.60
   0   2   6    7.40    0.41
   0   2  -6    6.51    0.25
   0  -2  -6    6.39    0.65
   0   2   6    6.84    0.67
   0   2   6    5.83    0.58
   0   2  -6    6.16    0.60
   0  -2  -7   83.16    2.15
   0   2   7   83.42    2.18
   0   2  -7   82.51    1.98
   0  -2  -7   79.43    1.96
   0  -2   7   79.10    2.11
   0   2   7   79.87    1.35
   0  -2  -8   15.79    1.06
   0   2  -8   16.38    1.00
   0   2   8   15.28    0.52
   0  -2  -8   16.98    0.98
   0  -2   8   14.77    1.06
   0  -2   9  843.37   10.62
   0   2   9  829.92    8.41
   0   2  -9  842.31   10.22
   0  -2  -9  838.57   10.54
   0   2   9  832.52    9.18
   0   2  -9  828.97    9.65
   0  -2  -9  858.26   10.19
   0  -2  10  195.91    4.11
   0   2 -10  193.02    3.80
   0  -2 -10  192.28    3.99
   0   2  10  192.74    2.88
   0   2 -10  188.78    3.36
   0  -2 -10  188.52    3.71
   0  -2  11   78.14    2.66
   0   2 -11   80.84    2.45
   0  -2 -11   82.07    2.60
   0   2  11   81.74    1.65
   0   2 -11   80.73    2.11
   0  -2 -11   82.38    2.41
   0   2  12   20.17    1.62
   0  -2  12   22.91    1.61
   0   2 -12   23.06    1.44
   0   2 -12   21.81    1.23
   0  -2 -12   22.47    1.37
   0   2  12   24.06    0.87
   0   2  13  119.60    3.67
   0  -2  13  115.23    3.48
   0  -2 -13  113.58    3.01
   0   2  13  111.93    1.94
   0   2 -14  124.21    2.91
   0  -2  14  113.28    3.58
   0   2  14  114.41    3.76
   0  -2 -14  116.36    3.12
   0   3   0    0.06    0.23
   0  -3   0    0.23    0.28
   0   3   0    0.06    0.26
   0  -3   0    0.11    0.23
   0  -3  -2  833.09    9.00
   0   3   2  828.27    9.07
   0  -3  -2  839.54    9.10
   0   3   2  842.28    9.10
   0   3  -2  839.29    8.97
   0  -3  -2  836.90    9.10
   0   3  -2  850.67    8.71
   0   3  -2  834.92    8.82
   0   3  -3  538.57    6.29
   0   3  -3  558.43    5.81
   0   3  -3  557.09    6.05
   0  -3   3  535.14    6.13
   0   3   3  562.18    6.56
   0  -3  -3  552.07    6.48
   0   3  -3  552.45    6.19
   0  -3   3  546.52    6.16
   0  -3  -3  560.92    6.37
   0   3   3  551.62    6.48
   0  -3  -3  563.71    6.52
   0   3  -4 2603.71   26.26
   0  -3   4 2547.05   26.26
   0   3  -4 2612.65   25.28
   0   3  -4 2627.74   25.85
   0  -3  -4 2632.92   26.51
   0   3   4 2624.37   26.55
   0   3   4 2650.54   26.14
   0   3  -4 2655.39   25.86
   0  -3  -4 2627.96   26.09
   0  -3  -4 2665.70   26.47
   0  -3   5  125.22    2.36
   0   3  -5  124.92    2.33
   0   3  -5  122.26    1.43
   0   3  -5  127.12    2.05
   0   3   5  126.47    2.52
   0  -3  -5  126.94    2.50
   0   3  -5  127.50    1.92
   0   3   5  124.44    2.12
   0  -3  -5  123.87    2.09
   0  -3  -5  126.50    2.43
   0  -3  -6   26.87    1.12
   0   3  -6   27.40    0.90
   0  -3  -6   31.79    1.26
   0   3   6   23.85    1.15
   0   3  -6   32.06    0.79
   0   3   6   27.04    0.90
   0  -3  -6   25.89    0.85
   0   3   6   25.72    1.07
   0  -3   6   24.48    1.10
   0   3  -6   25.89    1.07
   0  -3  -7  241.42    3.96
   0   3  -7  245.61    3.47
   0   3   7  247.47    4.18
   0  -3  -7  240.90    4.11
   0   3  -7  234.78    2.82
   0   3   7  237.35    3.85
   0  -3   7  239.80    4.00
   0   3  -7  238.58    3.82
   0   3  -8   34.97    1.16
   0   3   8   32.64    1.51
   0  -3  -8   36.66    1.55
   0   3  -8   33.53    0.59
   0   3   8   33.83    0.96
   0  -3   8   33.86    1.45
   0   3  -8   33.06    1.34
   0  -3  -8   33.30    1.39
   0   3   9  240.86    3.65
   0   3  -9  240.05    3.69
   0   3  -9  241.97    4.17
   0  -3  -9  237.56    4.45
   0   3   9  243.81    3.17
   0  -3  -9  245.20    4.29
   0  -3   9  249.39    4.49
   0  -3  10  404.50    6.41
   0   3 -10  394.69    6.04
   0  -3 -10  394.72    6.37
   0   3  10  401.04    5.25
   0   3 -10  394.13    5.41
   0   3  10  405.34    4.58
   0   3 -10  400.38    5.53
   0  -3 -10  401.88    6.17
   0  -3  11  213.71    4.46
   0   3  11  207.37    3.26
   0   3  11  207.41    2.47
   0   3 -11  213.23    4.15
   0  -3 -11  209.12    4.41
   0  -3 -11  214.04    4.19
   0   3 -11  209.67    3.64
   0   3 -11  213.39    3.58
   0  -3  12  185.71    4.31
   0   3 -12  187.48    3.37
   0   3 -12  179.53    3.94
   0   3 -12  184.10    3.43
   0  -3 -12  183.40    3.95
   0   3  12  187.67    2.99
   0  -3  13   95.48    3.15
   0   3  13  101.40    3.40
   0   3 -13   98.12    2.46
   0  -3 -13  102.71    2.94
   0   3  13   96.90    1.97
   0  -3  14    0.95    1.07
   0   3  14    1.53    1.19
   0  -3 -14   -0.14    0.95
   0   4   0 1574.07   16.06
   0   4   0 1559.61   16.38
   0  -4   0 1579.76   16.40
   0   4   1 3405.24   33.35
   0   4  -1 3352.41   33.64
   0   4   1 3442.35   33.72
   0  -4  -1 3417.45   33.71
   0  -4   1 3346.78   33.63
   0  -4  -1 3380.10   33.46
   0   4  -1 3368.36   33.24
   0   4   1 3425.90   33.49
   0   4   2  730.83    8.33
   0   4  -2  739.61    8.04
   0  -4  -2  755.20    8.48
   0   4  -2  738.23    8.35
   0   4   2  748.35    8.39
   0  -4  -2  735.12    8.35
   0   4  -2  727.57    7.97
   0  -4  -3 1331.86   14.35
   0   4   3 1339.49   14.33
   0   4  -3 1308.04   13.74
   0  -4   3 1370.08   13.94
   0   4   3 1361.16   14.34
   0   4  -3 1338.11   14.09
   0  -4   3 1358.53   14.06
   0  -4  -3 1339.85   14.28
   0   4  -3 1350.81   14.00
   0   4  -4 2347.02   23.99
   0   4  -4 2372.96   23.22
   0   4  -4 2375.60   23.61
   0  -4   4 2389.81   23.92
   0   4   4 2339.40   24.38
   0  -4  -4 2369.59   24.31
   0   4  -4 2380.67   23.86
   0   4   4 2326.89   24.13
   0  -4   4 2385.24   23.79
   0  -4  -4 2423.98   24.11
   0  -4  -4 2390.85   24.32
   0   4  -5 1138.99   12.63
   0   4  -5 1184.15   11.53
   0   4  -5 1150.47   12.15
   0  -4   5 1148.48   12.58
   0   4   5 1124.22   12.99
   0  -4  -5 1152.73   12.93
   0   4  -5 1142.70   12.22
   0   4   5 1147.80   12.53
   0  -4  -5 1168.06   12.49
   0  -4  -5 1162.82   12.92
   0   4  -6    1.75    0.48
   0  -4   6    1.86    0.52
   0   4  -6    2.98    0.21
   0   4  -6    4.18    0.48
   0  -4  -6    1.99    0.57
   0   4   6    2.84    0.63
   0   4  -6    2.59    0.39
   0   4   6    2.87    0.48
   0  -4  -6    2.17    0.44
   0   4   6    1.99    0.54
   0  -4  -6    2.56    0.60
   0  -4  -7  476.05    6.70
   0   4  -7  498.45    5.97
   0   4   7  491.51    6.89
   0  -4  -7  487.84    6.82
   0   4  -7  481.27    5.60
   0   4   7  489.08    6.04
   0   4   7  471.24    6.54
   0   4  -7  485.11    6.45
   0  -4   7  491.33    6.59
   0  -4  -8   33.37    1.49
   0   4  -8   34.31    1.16
   0  -4  -8   36.30    1.59
   0   4   8   35.32    1.61
   0   4  -8   35.29    0.89
   0   4   8   33.91    1.14
   0   4   8   34.44    1.44
   0   4  -8   36.32    1.43
   0  -4   8   36.48    1.49
   0  -4  -9  176.46    3.67
   0   4  -9  178.85    3.04
   0   4   9  180.17    3.89
   0  -4  -9  176.38    3.79
   0   4   9  187.41    2.87
   0   4  -9  174.55    2.20
   0   4   9  184.70    3.59
   0  -4   9  187.37    3.76
   0   4  -9  177.17    3.48
   0  -4 -10  209.88    4.35
   0   4 -10  204.12    3.90
   0   4 -10  201.75    3.38
   0   4  10  206.73    3.48
   0   4  10  203.41    3.01
   0   4  10  205.42    4.40
   0  -4  10  211.19    4.22
   0  -4 -10  202.73    4.11
   0   4 -11  631.03    8.56
   0   4  11  623.56    7.71
   0   4 -11  611.78    7.69
   0   4  11  627.81    6.98
   0  -4 -11  622.43    8.74
   0  -4  12  116.81    3.33
   0   4  12  114.90    2.39
   0   4  12  112.68    1.73
   0   4 -12  114.12    3.03
   0   4 -12  117.18    2.62
   0  -4 -12  114.13    3.13
   0   4 -12  114.99    2.50
   0  -4  13  523.45    8.31
   0   4 -13  508.29    6.97
   0  -4 -13  515.36    7.89
   0   4  13  531.82    6.59
   0  -4  14   49.31    2.37
   0  -4 -14   46.61    2.13
   0   5   0    0.28    0.33
   0   5   0    0.14    0.36
   0  -5   0    0.24    0.39
   0   5   1 1211.77   12.96
   0  -5  -1 1236.95   13.40
   0   5   1 1208.79   13.38
   0   5  -1 1213.66   13.32
   0  -5  -1 1221.87   13.08
   0   5   1 1227.95   13.12
   0   5  -1 1210.82   12.87
   0   5   2 1618.63   16.75
   0  -5   2 1571.69   16.46
   0   5  -2 1601.67   16.41
   0  -5  -2 1603.13   17.01
   0   5  -2 1579.23   16.85
   0   5   2 1600.31   16.84
   0   5  -2 1578.86   16.38
   0  -5  -2 1609.43   16.81
   0  -5  -3    4.06    0.55
   0   5   3    5.57    0.61
   0   5  -3    3.47    0.42
   0  -5   3    3.81    0.44
   0   5   3    3.09    0.51
   0   5  -3    3.58    0.50
   0  -5  -3    4.11    0.55
   0  -5   3    4.88    0.55
   0   5  -3    4.31    0.47
   0   5  -4 1342.34   14.28
   0   5  -4 1328.53   13.64
   0  -5   4 1314.19   14.12
   0   5  -4 1334.48   13.89
   0   5   4 1341.17   14.70
   0   5  -4 1324.82   14.31
   0   5   4 1344.86   14.58
   0  -5   4 1348.14   14.22
   0  -5  -4 1346.03   14.52
   0  -5  -4 1308.81   14.64
   0   5   4 1340.77   14.63
   0   5  -5  838.71    9.82
   0   5  -5  846.30    8.87
   0  -5   5  868.14    9.72
   0   5  -5  842.91    9.33
   0   5   5  856.97   10.27
   0   5   5  852.99    9.94
   0   5  -5  850.98    9.64
   0  -5  -5  860.51    9.89
   0  -5  -5  865.49   10.22
   0   5  -6  540.99    6.96
   0   5  -6  552.45    5.79
   0  -5   6  541.59    6.90
   0   5  -6  529.21    6.42
   0   5   6  541.26    7.39
   0  -5  -6  521.01    7.24
   0   5  -6  553.65    6.60
   0   5   6  531.78    6.90
   0  -5  -6  541.98    6.82
   0  -5  -6  544.18    7.30
   0   5  -7   98.37    2.35
   0   5  -7   99.26    1.33
   0   5  -7   99.32    1.99
   0  -5   7   94.11    2.29
   0   5   7   96.66    2.59
   0  -5  -7   93.59    2.51
   0   5  -7   99.84    1.97
   0   5   7   97.55    2.21
   0   5   7   95.68    2.44
   0  -5  -7   94.45    2.50
   0  -5  -8   14.23    1.11
   0   5  -8   17.00    0.87
   0  -5   8   16.46    1.05
   0   5   8   15.41    1.19
   0  -5  -8   12.30    1.10
   0   5   8   14.33    0.87
   0   5  -8   15.98    0.74
   0   5   8   13.27    1.05
   0   5  -8   14.39    1.04
   0  -5  -9   65.95    2.25
   0   5  -9   62.68    1.65
   0  -5  -9   68.57    2.32
   0   5   9   63.65    2.31
   0   5  -9   63.43    1.34
   0   5   9   63.54    1.71
   0   5   9   65.93    2.12
   0  -5   9   64.79    2.11
   0   5  -9   62.32    1.98
   0   5  10 1213.21   13.84
   0   5 -10 1235.73   13.44
   0  -5 -10 1243.81   14.98
   0   5  10 1256.47   15.20
   0   5  10 1245.33   13.34
   0   5 -10 1214.58   12.37
   0   5 -10 1234.93   14.27
   0  -5  10 1245.28   14.65
   0  -5 -10 1234.39   14.75
   0   5  11  123.52    2.71
   0   5 -11  126.17    2.54
   0   5  11  126.46    2.33
   0  -5 -11  118.13    3.20
   0  -5  11  126.07    3.29
   0   5  11  123.72    3.56
   0   5 -11  126.92    3.07
   0  -5  12   23.27    1.60
   0   5 -12   22.40    1.47
   0   5  12   26.18    0.95
   0   5 -12   27.23    1.28
   0  -5 -12   23.70    1.60
   0   5  12   22.82    1.20
   0  -5  13   60.18    2.49
   0  -5 -13   63.38    2.42
   0   5  13   59.47    1.80
   0  -5  14  234.83    5.13
   0  -5 -14  239.49    5.03
   0   6   0 7554.67   73.19
   0   6   0 7563.43   73.65
   0  -6   0 7450.79   73.64
   0   6  -1  409.88    5.41
   0  -6  -1  415.94    5.86
   0   6   1  422.83    5.87
   0   6  -1  416.74    5.80
   0   6   1  425.59    5.45
   0  -6   2 1637.40   16.93
   0   6   2 1593.96   17.28
   0  -6  -2 1624.58   17.28
   0   6  -2 1606.65   16.84
   0   6  -2 1585.70   17.35
   0  -6  -2 1594.54   17.48
   0   6   2 1625.84   17.16
   0   6   3    0.41    0.46
   0   6   3    0.93    0.50
   0  -6  -3    1.77    0.57
   0  -6   3    0.62    0.44
   0   6  -3    0.23    0.39
   0  -6  -3    0.82    0.52
   0  -6   3    0.55    0.44
   0   6  -3    0.74    0.36
   0   6   4    2.99    0.60
   0  -6  -4    2.86    0.61
   0   6   4    2.40    0.60
   0   6  -4    2.88    0.42
   0  -6   4    2.71    0.53
   0   6  -4    3.26    0.49
   0   6  -4    4.26    0.60
   0  -6   4    2.41    0.53
   0   6   4    3.74    0.64
   0  -6  -4    4.51    0.65
   0   6  -4    3.34    0.52
   0   6  -5  198.96    3.37
   0   6  -5  190.14    2.74
   0  -6   5  191.37    3.27
   0   6   5  198.98    3.72
   0   6  -5  193.22    3.35
   0   6   5  196.81    3.56
   0  -6  -5  189.04    3.48
   0  -6  -5  194.95    3.67
   0   6  -5  193.43    3.05
   0   6  -6  894.54   10.60
   0   6  -6  902.00    9.45
   0   6  -6  898.01   10.05
   0   6   6  890.82   11.16
   0   6  -6  894.73   10.36
   0   6   6  907.87   10.74
   0  -6  -6  912.32   10.63
   0  -6  -6  912.06   11.08
   0   6  -7  179.68    3.40
   0   6   7  176.97    3.77
   0   6  -7  178.28    2.38
   0  -6   7  180.53    3.37
   0   6  -7  181.19    2.96
   0   6  -7  177.41    3.08
   0   6   7  181.47    3.39
   0   6   7  183.38    3.64
   0  -6  -7  180.49    3.74
   0  -6  -8    1.82    0.80
   0   6   8    1.60    0.72
   0   6  -8    1.12    0.19
   0   6   8    1.31    0.58
   0   6  -8    1.01    0.47
   0   6  -8    0.45    0.61
   0   6   8    1.78    0.84
   0   6  -8    0.99    0.47
   0  -6   8    1.51    0.61
   0  -6  -9    3.74    0.92
   0   6  -9    4.78    0.64
   0   6   9    3.55    0.98
   0  -6  -9    5.19    1.00
   0   6  -9    4.50    0.79
   0   6   9    4.09    0.71
   0   6  -9    6.36    0.61
   0   6   9    4.96    0.90
   0  -6   9    3.74    0.77
   0   6 -10   12.07    0.84
   0  -6  10   11.98    1.16
   0   6 -10   10.52    1.05
   0   6  10   11.34    1.30
   0   6  10   12.10    0.90
   0   6 -10   10.81    0.64
   0   6  10   12.30    1.06
   0  -6 -10   12.83    1.25
   0  -6  11   34.50    1.75
   0   6 -11   35.32    1.30
   0   6 -11   34.39    1.65
   0   6  11   33.60    1.99
   0   6  11   35.81    1.35
   0   6  11   36.13    1.56
   0  -6 -11   33.49    1.87
   0   6  12  404.85    5.97
   0  -6  12  410.50    6.75
   0   6 -12  420.68    6.55
   0   6  12  411.24    5.44
   0   6  12  416.24    7.44
   0  -6 -12  422.22    7.02
   0   6  13  105.62    2.56
   0  -6 -13  100.41    3.19
   0  -6  13  108.90    3.22
   0  -7   0    0.13    0.55
   0   7   0    0.48    0.55
   0  -7   1  286.82    4.39
   0   7   1  290.27    4.84
   0   7  -1  296.62    4.81
   0  -7  -1  288.12    4.82
   0   7   1  293.22    4.60
   0   7  -1  288.53    4.41
   0  -7   2 3033.45   31.18
   0   7   2 3142.18   31.42
   0   7  -2 3083.52   31.72
   0  -7  -2 3090.24   31.82
   0   7  -2 3094.41   31.08
   0  -7  -2 3034.51   31.48
   0   7   2 3082.81   31.57
   0   7  -3   12.26    0.78
   0  -7   3   10.38    0.80
   0   7   3   12.00    0.93
   0   7  -3   13.06    0.98
   0  -7   3   10.70    0.91
   0  -7  -3   11.66    0.97
   0   7  -3   11.62    0.79
   0   7   3   12.83    1.00
   0  -7  -3   10.79    0.92
   0   7  -4   27.23    1.17
   0   7  -4   30.38    1.08
   0  -7   4   27.73    1.22
   0   7   4   29.01    1.38
   0   7  -4   30.97    1.35
   0   7   4   30.86    1.43
   0  -7  -4   33.99    1.46
   0   7   4   27.53    1.34
   0  -7  -4   29.25    1.36
   0   7  -4   28.20    1.13
   0   7  -5  191.98    3.42
   0   7  -5  189.21    2.90
   0  -7   5  194.13    3.42
   0   7   5  183.49    3.67
   0   7  -5  184.45    3.49
   0   7   5  189.89    3.74
   0   7  -5  189.52    3.15
   0  -7  -5  190.72    3.75
   0  -7  -5  188.12    3.63
   0   7   5  199.53    3.85
   0   7   6   21.25    1.34
   0   7   6   23.35    1.26
   0   7  -6   22.15    1.14
   0   7  -6   23.85    0.84
   0   7  -6   23.02    1.21
   0   7  -6   22.81    1.02
   0  -7  -6   26.18    1.42
   0   7   7   26.86    1.54
   0   7  -7   27.46    0.84
   0   7   7   26.79    1.35
   0   7  -7   27.42    1.24
   0   7  -7   29.70    1.37
   0  -7  -7   27.31    1.52
   0   7  -7   27.24    1.12
   0   7   8    0.70    0.77
   0  -7  -8    0.87    0.81
   0   7  -8    0.41    0.30
   0   7  -8    1.12    0.58
   0   7   8    0.88    0.62
   0   7   8    0.93    0.83
   0   7  -8    0.96    0.71
   0   7  -8    0.30    0.50
   0   7  -9   28.72    1.18
   0   7   9   29.39    1.74
   0   7   9   27.55    1.36
   0   7  -9   28.99    1.18
   0   7  -9   28.19    1.45
   0  -7  -9   27.00    1.64
   0   7  10   22.06    1.37
   0  -7  10   27.40    1.49
   0   7 -10   25.09    1.12
   0   7  10   22.55    1.67
   0   7  10   24.42    1.30
   0   7 -10   24.86    1.45
   0  -7 -10   23.97    1.64
   0   7  11  106.21    2.74
   0  -7  11   98.55    2.83
   0   7  11   98.57    3.27
   0   7  11  101.98    2.45
   0  -7 -11   98.40    3.12
   0   7 -11   98.26    2.73
   0  -7  12  167.38    3.86
   0   7 -12  168.85    3.74
   0   7  12  162.40    3.10
   0   7  12  159.26    4.34
   0  -7 -12  159.07    4.09
   0  -7  13  121.68    3.37
   0  -7 -13  121.07    3.56
   0   8   0   77.23    2.35
   0  -8   0   76.74    2.33
   0   8   0   73.44    2.07
   0  -8   1 2528.09   26.14
   0   8   1 2557.60   26.13
   0   8   1 2480.14   26.78
   0   8  -1 2586.26   26.81
   0  -8  -1 2491.37   26.79
   0   8   1 2475.11   26.37
   0   8  -1 2503.34   26.12
   0  -8   2  920.57   10.88
   0   8   2  923.52   11.04
   0   8  -2  924.11   11.36
   0  -8  -2  932.19   11.48
   0   8  -2  914.93   10.76
   0   8   2  922.41   11.17
   0   8  -3  133.82    2.67
   0   8  -3  132.42    2.68
   0  -8   3  130.60    2.81
   0   8   3  131.27    2.99
   0   8  -3  137.66    3.09
   0  -8  -3  136.59    3.17
   0  -8   3  130.87    3.01
   0  -8  -3  136.06    3.04
   0   8  -3  127.94    2.68
   0   8   3  128.80    3.01
   0   8  -4   39.16    1.46
   0   8   4   39.16    1.65
   0   8  -4   38.54    1.32
   0  -8   4   38.52    1.52
   0   8  -4   35.08    1.54
   0   8   4   39.58    1.70
   0  -8  -4   38.31    1.66
   0   8   4   39.46    1.68
   0  -8  -4   41.27    1.71
   0   8  -4   36.70    1.37
   0   8   5    1.56    0.73
   0  -8  -5    1.53    0.73
   0   8  -5    1.60    0.49
   0  -8   5    1.97    0.62
   0   8  -5    2.34    0.62
   0  -8  -5    1.25    0.70
   0   8   5    1.42    0.70
   0   8  -5    1.43    0.67
   0   8  -5    2.02    0.62
   0   8  -6  496.18    6.03
   0   8   6  488.67    7.24
   0   8  -6  507.03    7.01
   0   8   6  485.45    7.43
   0   8  -6  502.33    6.90
   0   8  -6  502.69    6.48
   0  -8  -6  484.07    7.34
   0   8  -7   96.39    1.83
   0   8   7   93.31    2.62
   0   8  -7  101.18    2.50
   0   8   7   92.98    2.85
   0   8  -7  100.20    2.56
   0   8  -7   95.82    2.20
   0  -8  -7   94.99    2.81
   0   8  -8   49.06    1.17
   0   8  -8   46.80    1.67
   0   8   8   46.90    1.86
   0   8   8   47.37    2.17
   0   8  -8   47.43    1.82
   0  -8  -8   45.72    2.05
   0   8  -8   49.53    1.56
   0   8   9   34.69    1.69
   0   8   9   31.51    1.85
   0  -8  -9   32.87    1.82
   0   8  -9   34.47    1.33
   0   8  -9   32.47    1.60
   0   8  -9   33.19    1.38
   0   8   9   32.72    1.58
   0  -8 -10    2.36    1.05
   0   8  10    3.49    1.10
   0   8 -10    1.69    0.85
   0   8  10    1.90    0.81
   0   8  11  223.22    5.16
   0   8  11  223.70    4.11
   0  -8 -11  223.74    4.94
   0   8 -11  226.81    4.38
   0  -8 -12   67.95    2.71
   0  -9   0    0.10    0.69
   0  -9   0   -0.04    0.78
   0   9   0    0.77    0.79
   0   9   0    0.24    0.70
   0  -9   1  767.07    9.65
   0   9   1  776.53    9.62
   0   9  -1  778.77   10.20
   0   9   1  773.96   10.25
   0  -9  -1  762.33   10.19
   0   9   1  772.02    9.83
   0   9  -1  764.73    9.63
   0   9  -2  475.84    6.63
   0  -9   2  481.64    6.78
   0   9   2  477.29    6.85
   0   9  -2  493.48    7.25
   0  -9  -2  486.60    7.28
   0   9  -2  479.61    6.69
   0   9   2  470.13    6.96
   0   9  -3  155.90    3.09
   0   9  -3  157.97    3.12
   0  -9   3  162.97    3.37
   0   9   3  155.07    3.42
   0   9  -3  159.33    3.56
   0  -9  -3  168.47    3.72
   0  -9  -3  155.14    3.47
   0   9  -3  153.80    3.16
   0   9   3  164.19    3.57
   0   9  -4  106.10    2.54
   0   9  -4  112.31    2.42
   0  -9   4  107.57    2.69
   0   9   4  104.30    2.83
   0   9   4  104.61    2.94
   0   9  -4  103.99    2.83
   0  -9  -4  108.08    2.96
   0   9  -4  108.16    2.52
   0   9   4  110.41    2.93
   0  -9  -4  101.73    2.83
   0   9   5   67.91    2.32
   0   9  -5   60.44    1.68
   0  -9   5   64.29    2.06
   0   9  -5   61.31    2.15
   0   9   5   61.08    2.23
   0   9   5   62.13    2.24
   0  -9  -5   66.19    2.31
   0   9  -5   63.47    1.88
   0   9  -5   62.91    1.97
   0   9   6   -0.18    0.85
   0   9  -6    0.70    0.65
   0  -9  -6    0.45    0.84
   0   9  -6    1.17    0.50
   0  -9   6    0.80    0.74
   0   9   6    0.74    0.75
   0   9  -6    0.53    0.70
   0   9  -7  149.95    2.55
   0   9  -7  143.47    3.25
   0   9   7  145.47    3.51
   0   9   7  141.92    3.69
   0   9  -7  144.74    3.23
   0   9  -7  143.19    2.92
   0  -9  -7  141.94    3.60
   0   9  -8  122.56    2.18
   0   9   8  125.45    3.54
   0   9  -8  128.94    3.06
   0  -9  -8  123.73    3.42
   0   9  -8  124.07    2.67
   0   9   8  120.23    3.15
   0   9  -8  121.82    2.89
   0   9   9   27.10    1.79
   0  -9  -9   25.50    1.77
   0   9  -9   28.29    1.53
   0  -9 -10  106.70    3.28
   0   9  10   92.92    3.27
   0  -9 -11   99.66    3.25
   0  10   0  523.51    7.99
   0  10   0  534.65    7.30
   0  10   0  528.95    7.60
   0 -10   0  527.14    7.53
   0 -10  -1 3095.13   32.92
   0 -10   1 3149.16   32.84
   0  10   1 3140.20   32.72
   0  10   1 3193.42   33.59
   0  10  -1 3194.47   33.50
   0  10  -1 3138.03   32.73
   0  10   1 3191.63   33.04
   0  10  -1 3154.13   32.78
   0  10  -2  864.22   10.49
   0 -10   2  871.98   10.92
   0  10   2  861.39   10.91
   0  10  -2  881.50   11.40
   0  10  -2  870.09   10.65
   0  10   2  869.13   11.14
   0  10  -2  851.57   10.72
   0 -10   3  805.15   10.35
   0  10  -3  801.09    9.95
   0  10   3  798.95   10.47
   0  10  -3  809.92   10.77
   0  10  -3  814.95    9.93
   0  10  -3  809.23   10.13
   0  10  -4   28.66    1.32
   0 -10   4   23.52    1.43
   0  10   4   27.45    1.59
   0  10  -4   28.75    1.62
   0  10  -4   26.10    1.34
   0  10  -4   25.96    1.37
   0 -10  -4   28.61    1.64
   0  10  -5   73.87    1.96
   0 -10   5   77.92    2.36
   0  10   5   75.34    2.56
   0  10  -5   73.19    2.47
   0 -10  -5   73.76    2.54
   0  10  -5   74.97    2.20
   0  10  -5   77.80    2.26
   0  10  -6    4.93    0.87
   0 -10   6    6.54    0.97
   0 -10  -6    5.37    1.09
   0  10  -6    5.60    0.89
   0  10  -6    5.00    0.99
   0  10   6    5.34    1.09
   0  10   7  166.03    4.07
   0  10  -7  160.50    3.61
   0  10  -7  161.81    2.86
   0  10  -7  162.24    3.54
   0 -10  -7  158.34    3.99
   0  10  -7  165.78    3.30
   0 -10  -8  211.65    4.80
   0  10  -8  213.45    3.87
   0  10  -8  218.53    4.22
   0  10  -8  219.75    4.24
   0  10   8  212.62    4.86
   0 -10  -9   21.23    1.75
   0  10   9   20.60    1.70
   0 -10 -10  164.95    4.30
   0 -11   0    2.10    0.87
   0  11   0    0.15    0.74
   0  11   0    0.04    0.75
   0  11   1  110.24    3.01
   0  11  -1  107.31    2.86
   0  11  -1  109.44    2.74
   0  11   1  111.64    2.92
   0 -11  -1  108.76    3.02
   0 -11   1  111.56    2.98
   0  11   2  187.85    3.99
   0  11  -2  184.70    3.76
   0  11  -2  188.21    3.90
   0  11  -2  189.01    3.71
   0 -11   2  182.59    3.99
   0  11   3   87.83    2.69
   0  11  -3   91.50    2.45
   0 -11   3   85.84    2.66
   0  11  -3   89.15    2.45
   0  11  -3   83.88    2.50
   0  11  -4    1.14    0.73
   0  11   4    0.42    0.85
   0 -11   4    1.32    0.88
   0  11  -4    2.64    0.77
   0  11  -4    1.22    0.83
   0  11  -5    0.44    0.66
   0 -11  -5    0.15    0.95
   0 -11   5    0.94    0.78
   0  11   5    0.20    0.87
   0  11  -5    0.79    0.76
   0  11  -5    0.22    0.77
   0  11  -6   93.61    2.25
   0  11   6   89.44    3.00
   0  11  -6   93.62    2.63
   0 -11  -6   94.92    3.09
   0  11  -6   95.59    2.61
   0 -11   6   93.83    2.77
   0 -11  -7  256.81    5.32
   0  11  -7  259.18    4.54
   0  11   7  259.46    5.43
   0 -11  -8   71.98    2.79
   0  11   8   67.36    2.78
   0 -11  -9    5.57    1.37
   0 -12   0   40.85    1.94
   0  12   0   41.50    1.81
   0 -12  -1   31.52    1.76
   0 -12   1   29.04    1.70
   0  12  -1   28.84    1.53
   0  12   1   28.76    1.58
   0 -12  -2   88.78    2.85
   0  12  -2   83.59    2.45
   0 -12   2   82.98    2.74
   0  12   2   88.12    2.72
   0 -12   3    8.92    1.24
   0  12   3    7.70    1.11
   0  12  -3    6.60    1.01
   0 -12   4   22.68    1.55
   0  12  -4   21.05    1.27
   0  12  -4   20.51    1.33
   0  12   4   22.08    1.60
   0 -12   5   37.86    1.91
   0  12  -5   35.18    1.55
   0  12   5   36.10    2.00
   0 -12  -5   35.50    2.02
   0  12   6   15.42    1.52
   0 -12  -6   11.51    1.45
   0 -12   6   15.67    1.34
   0  12   7    9.98    1.48
   0 -12  -7   11.47    1.43
   0  13   0    0.13    0.89
   0 -13   0    0.25    1.01
   0  13   1   -0.27    0.88
   0  13  -1    1.47    0.86
   0 -13   1    0.15    0.94
   0 -13  -1   -0.20    1.04
   0  13   2  311.30    5.69
   0  13  -2  302.35    5.31
   0 -13   2  306.11    5.83
   0  13  -2  304.30    5.30
   0  13   3  636.97    9.35
   0 -13  -3  649.92    9.60
   0 -13   3  638.14    9.40
   0  13   4   65.11    2.61
   0 -13   4   69.43    2.59
   0  13   5  179.76    4.40
   0 -13   5  185.33    4.25
   0  13   6   26.36    1.89
   0 -13   6   27.41    1.77
   0  14   0    2.05    0.95
   0 -14   0    0.50    1.05
   0  14   1    6.69    1.16
   0  14  -1    6.05    1.15
   0 -14  -1    6.67    1.30
   0 -14   1    6.04    1.24
   0  14   2    0.61    1.05
   0 -14   2    1.93    1.15
   0 -14  -2   -0.68    1.14
   1   0 -15    0.93    0.87
   1   0 -14  132.32    3.31
  -1   0  14  132.81    4.02
   1   0 -13    3.62    0.90
  -1   0  13    0.24    1.01
  -1   0  12   36.05    0.64
  -1   0  12   36.58    0.61
   1   0 -12   43.19    1.98
   1   0 -12   42.83    1.78
  -1   0  12   39.06    2.07
   1   0 -11    0.68    0.72
   1   0 -11    0.04    0.63
  -1   0  11    1.26    0.87
  -1   0  11    0.37    0.24
  -1   0  11    0.07    0.25
   1   0 -10   33.90    1.46
   1   0 -10   33.38    1.59
  -1   0  10   31.82    0.77
   1   0  -9    0.06    0.54
   1   0  -9   -0.24    0.62
   1   0  -8    8.97    0.77
   1   0  -8    9.49    0.86
   1   0  -7    0.63    0.40
   1   0  -7   -0.05    0.45
   1   0  -6 1739.65   18.18
   1   0  -6 1734.55   17.93
   1   0  -6 1723.13   16.75
  -1   0   6 1709.41   18.42
   1   0  -5    0.31    0.17
  -1   0   5    0.61    0.45
   1   0  -5   -0.04    0.40
   1   0  -4   38.40    0.67
  -1   0   4   36.35    1.12
   1   0  -4   35.24    1.05
  -1   0   4   39.43    0.69
   1   0  -3    0.20    0.12
   1   0  -3    0.40    0.25
  -1   0   3    0.81    0.27
   1   0  -1    0.21    0.11
  -1   0   1    0.12    0.09
   1   0  -1    0.20    0.08
   1   0   1    1.29    0.11
   1   0   1    1.70    0.14
  -1   0  -2   44.59    0.83
  -1   0  -2   43.30    0.68
  -1   0  -2   44.62    0.67
  -1   0  -3    0.59    0.20
  -1   0  -3    0.55    0.14
  -1   0  -3    0.21    0.10
  -1   0  -4  205.10    2.93
   1   0   4  212.05    2.40
  -1   0  -4  202.28    2.61
   1   0   4  210.06    2.28
  -1   0  -5    1.00    0.34
  -1   0  -5    1.33    0.28
   1   0   5    0.29    0.15
  -1   0  -6 3289.51   32.60
   1   0   6 3326.00   31.95
  -1   0  -6 3300.73   33.16
  -1   0  -7    0.29    0.34
  -1   0  -7   -0.05    0.44
   1   0   7    0.19    0.48
   1   0   8  614.68    6.46
  -1   0  -8  639.02    8.00
   1   0   8  620.64    8.08
  -1   0  -8  621.33    7.37
   1   0   9    0.48    0.70
  -1   0  -9    1.17    0.67
  -1   0  -9    0.42    0.49
   1   0   9    1.05    0.29
  -1   0 -10 1476.25   16.73
   1   0  10 1481.47   14.46
  -1   0 -10 1432.15   15.88
   1   0  10 1475.11   17.02
  -1   0 -11    0.16    0.76
  -1   0 -11    0.71    0.60
   1   0  11   -0.33    0.87
  -1   0 -12  254.01    4.87
   1   0  12  249.09    5.13
  -1   0 -12  252.95    4.26
   1   0  13    0.17    1.02
  -1   0 -13   -0.10    0.67
   1   0  14  727.79   10.81
  -1   0 -14  723.11    9.23
   1   1 -15   63.96    2.30
   1  -1 -15   65.74    2.44
  -1  -1  14  171.68    4.45
  -1   1  14  160.46    4.39
   1   1 -14  166.65    3.60
   1  -1 -14  168.08    3.77
  -1  -1  13   96.58    3.29
  -1   1  13  105.62    3.43
  -1   1  13  103.84    1.71
  -1   1  13  102.03    1.59
   1   1 -13  104.57    2.78
   1  -1 -13  105.89    2.93
  -1  -1  12  267.11    5.41
  -1   1  12  265.11    5.47
   1   1 -12  261.30    5.01
  -1   1  12  259.05    3.29
   1   1 -12  266.80    4.64
   1  -1 -12  257.88    4.76
  -1   1  11   13.05    0.63
   1   1 -11   11.23    0.98
   1  -1 -11   13.39    1.08
  -1  -1  11   13.44    1.31
   1   1 -11   10.93    1.09
   1  -1 -11   12.11    1.15
   1   1 -10   73.49    2.07
   1  -1 -10   74.18    2.20
  -1  -1  10   73.00    2.47
   1  -1 -10   70.56    2.29
   1   1 -10   71.06    2.24
  -1  -1   9  176.93    1.94
  -1  -1   9  172.41    1.97
   1  -1  -9  187.59    3.68
   1   1  -9  180.03    3.54
   1  -1  -9  182.22    3.44
   1   1  -9  182.61    3.31
  -1  -1   9  178.07    3.82
   1  -1  -8    4.73    0.70
   1   1  -8    4.46    0.71
  -1  -1   8    4.70    0.26
   1  -1  -8    5.21    0.67
  -1   1   8    5.14    0.27
  -1  -1   7  599.61    6.28
  -1   1   7  625.40    6.37
   1   1  -7  620.77    7.73
   1  -1  -7  627.62    7.83
   1  -1  -7  612.44    6.39
   1  -1  -7  613.13    7.59
  -1   1   7  602.79    7.97
  -1  -1   6    1.20    0.19
  -1   1   6    0.53    0.19
   1   1  -6    1.17    0.15
   1  -1  -6    0.86    0.22
   1  -1  -6    0.94    0.39
   1   1  -6    0.69    0.43
  -1   1   6    0.98    0.50
   1  -1  -6    0.49    0.41
   1  -1  -5 4846.34   47.64
  -1   1   5 4826.94   47.75
   1   1  -5 4878.90   47.62
   1   1  -2  911.10    9.08
   1  -1  -2  905.20    9.36
   1  -1  -2  913.87    9.22
   1  -1  -2  917.70    9.41
   1   1  -2  914.24    9.47
  -1   1   2  915.63    9.38
  -1  -1   2  892.46    9.48
   1   1  -1 1399.15   13.68
   1   1  -1 1397.52   13.72
  -1  -1   1 1395.71   13.71
  -1  -1   1 1357.15   13.53
  -1   1   1 1382.51   13.65
   1  -1  -1 1358.02   13.67
  -1   1   1 1396.22   13.66
   1  -1  -1 1373.69   13.67
   1  -1  -1 1392.17   13.56
   1  -1   0  157.98    1.96
  -1   1   0  151.43    1.92
  -1  -1   0  159.43    1.91
   1   1   0  156.95    1.88
   1  -1   0  155.60    1.81
  -1  -1   0  157.80    1.88
   1   1   0  160.65    1.89
  -1   1  -1 1106.89   10.97
   1  -1   1 1098.26   10.99
   1   1   1 1131.26   10.98
  -1  -1  -1 1106.42   10.98
  -1  -1  -1 1137.48   10.95
  -1   1  -2   31.31    0.54
  -1  -1  -2   32.39    0.78
   1   1   2   30.05    0.77
  -1   1  -2   31.61    0.61
  -1   1  -2   30.79    0.60
  -1  -1  -2   33.18    0.71
  -1  -1  -2   30.10    0.67
   1   1   3  424.04    5.01
  -1  -1  -3  426.95    5.00
  -1   1  -3  429.59    4.75
   1  -1   3  426.78    4.46
  -1   1  -3  416.91    4.30
  -1  -1  -3  419.71    4.76
   1   1   4 1572.21   15.37
  -1   1  -4 1577.00   15.04
  -1  -1  -4 1543.22   15.97
  -1   1  -4 1531.72   15.70
   1  -1   4 1523.83   15.06
   1   1   4 1568.30   15.23
   1   1   4 1541.34   15.60
  -1   1  -4 1534.32   15.26
  -1  -1  -4 1515.71   15.63
   1  -1   5    0.93    0.38
  -1  -1  -5    0.96    0.36
  -1   1  -5    1.73    0.36
  -1  -1  -5    0.69    0.28
   1   1   5    0.24    0.16
  -1   1  -5    0.59    0.21
   1   1   5    0.17    0.27
   1   1   5    1.59    0.25
   1  -1   6 1093.62   12.23
   1   1   6 1119.18   11.31
  -1   1  -6 1103.21   12.07
  -1  -1  -6 1115.66   12.32
  -1   1  -6 1097.70   11.51
   1   1   6 1107.95   11.03
  -1  -1  -6 1117.26   11.87
   1  -1   7  542.84    6.97
   1   1   7  527.47    5.87
   1   1   7  534.76    5.45
   1   1   7  534.93    5.45
  -1   1  -7  536.44    6.22
  -1   1  -7  540.07    6.81
  -1  -1  -7  523.74    6.95
  -1  -1  -7  543.58    6.55
   1   1   8   41.37    1.60
   1  -1   8   43.67    1.63
  -1  -1  -8   42.52    1.57
  -1   1  -8   43.43    1.53
   1   1   8   44.42    1.00
  -1   1  -8   40.82    1.21
  -1  -1  -8   41.67    1.35
   1  -1   9 1796.34   19.63
   1   1   9 1786.49   19.68
  -1  -1  -9 1790.38   19.51
  -1   1  -9 1781.62   19.30
   1   1   9 1747.58   17.75
  -1   1  -9 1796.70   18.50
  -1  -1  -9 1788.11   18.87
   1   1  10  430.06    6.82
   1  -1  10  457.03    6.88
  -1  -1 -10  448.88    6.72
  -1   1 -10  434.60    6.52
   1   1  10  450.37    5.11
  -1   1 -10  439.21    5.85
  -1  -1 -10  454.60    6.16
  -1   1 -11  588.04    8.17
  -1  -1 -11  578.14    8.28
   1   1  11  578.64    6.39
   1   1  11  599.50    8.65
   1  -1  11  566.55    8.42
  -1  -1 -11  589.59    7.68
  -1   1 -11  583.85    7.36
  -1  -1 -12   14.17    1.28
  -1   1 -12   16.41    1.31
   1   1  12   15.50    1.47
   1  -1  12   14.49    1.36
  -1   1 -12   13.93    0.99
  -1  -1 -12   15.28    1.08
   1   1  12   15.48    0.61
   1   1  13  254.28    5.34
   1  -1  13  244.34    5.19
  -1  -1 -13  252.14    4.35
  -1   1 -13  251.27    4.12
   1  -1  14   53.99    2.49
   1   1  14   57.98    2.63
  -1  -1 -14   55.93    2.00
   1  -2 -15   34.25    1.92
  -1  -2  14  333.85    6.58
  -1   2  14  339.44    6.80
   1   2 -14  336.95    5.60
   1  -2 -14  335.70    5.98
  -1   2  14  328.72    4.11
  -1   2  13   89.56    3.21
  -1  -2  13   87.43    3.09
  -1   2  13   89.95    1.74
   1   2 -13   91.45    2.54
   1  -2 -13   86.92    2.73
  -1  -2  12   18.94    1.52
  -1   2  12   19.07    0.85
   1   2 -12   19.89    1.25
   1  -2 -12   16.67    1.32
   1  -2 -11  151.34    3.43
   1   2 -11  152.74    3.49
   1  -2 -11  152.66    3.65
   1   2 -11  147.16    3.14
  -1  -2  11  148.04    3.76
   1  -2 -10  415.94    6.25
  -1   2  10  410.85    4.39
   1   2 -10  419.92    5.91
   1  -2 -10  414.73    6.49
   1   2 -10  415.30    6.30
  -1  -2  10  407.66    6.64
  -1   2   9   34.19    0.80
   1  -2  -9   34.49    1.52
   1  -2  -9   32.60    1.57
   1   2  -9   34.30    1.50
  -1  -2   9   35.57    1.67
  -1   2   9   30.92    1.58
  -1   2   8   69.56    1.27
  -1  -2   8   73.71    2.20
  -1   2   8   67.14    2.13
   1   2  -8   70.85    2.01
   1  -2  -8   69.19    1.29
   1  -2  -8   66.46    1.97
   1  -2  -8   71.18    2.11
   1   2  -7  610.27    6.33
  -1   2   7  624.35    6.72
   1  -2  -7  635.39    7.98
   1   2  -7  632.07    7.83
  -1   2   7  620.40    8.06
   1  -2  -7  609.61    7.83
   1  -2  -7  612.46    6.81
   1   2  -7  628.70    6.37
   1  -2  -6 5446.28   54.15
   1   2  -6 5472.60   52.69
   1  -2  -6 5491.77   54.04
   1   2  -6 5535.60   54.05
  -1   2   6 5551.98   54.21
  -1  -2   5   77.24    1.03
  -1   2   5   76.62    1.38
   1  -2  -5   78.34    1.83
  -1   2   5   74.47    1.81
   1  -2  -5   76.11    1.78
   1  -2  -5   75.97    1.45
   1   2  -5   74.87    1.23
   1   2  -5   77.19    1.81
  -1  -2   4  655.99    6.56
   1   2  -4  642.57    6.64
  -1   2   4  653.18    7.51
   1  -2  -4  664.70    7.54
  -1   2   4  656.97    7.03
   1  -2  -4  636.93    7.12
  -1   2   4  628.99    7.38
   1  -2  -4  649.74    7.53
   1   2  -4  657.22    7.55
   1   2  -3 3432.60   34.18
  -1   2   3 3457.40   34.33
   1  -2  -3 3515.95   34.34
  -1   2   3 3542.26   34.33
   1  -2  -3 3491.95   34.41
   1   2  -3 3555.54   34.40
   1   2  -2   17.10    0.63
   1   2  -2   16.61    0.46
  -1  -2   2   16.73    0.61
  -1  -2   2   17.11    0.61
   1   2  -2   16.57    0.58
  -1   2   2   16.24    0.57
   1  -2  -2   17.09    0.62
  -1   2   2   17.11    0.62
   1  -2  -2   17.89    0.65
   1   2  -1   10.70    0.39
  -1  -2   1   11.08    0.46
  -1   2   1   10.52    0.39
  -1   2   1   11.86    0.49
   1  -2  -1   10.45    0.48
  -1   2   1   11.36    0.46
   1  -2  -1   11.11    0.46
   1   2   0 1177.36   11.75
  -1  -2   0 1173.18   11.77
  -1  -2   0 1132.21   11.78
   1   2   0 1169.51   11.72
  -1   2   0 1178.93   11.68
   1  -2   0 1161.86   11.95
  -1   2   0 1183.68   11.90
  -1   2  -1   51.06    0.72
  -1   2  -1   51.25    1.02
   1  -2   1   47.63    1.03
   1   2   1   49.26    0.99
  -1  -2  -1   50.66    1.00
   1   2   1   52.71    1.00
  -1   2  -1   51.88    0.83
   1   2   2  724.55    7.90
  -1   2  -2  715.77    7.59
  -1   2  -2  735.11    7.24
  -1  -2  -2  727.04    7.73
  -1   2  -2  735.90    7.38
  -1   2  -3  192.68    2.20
   1   2   3  193.14    2.85
  -1  -2  -3  192.25    2.81
  -1   2  -3  190.16    2.39
   1  -2   3  185.27    2.45
  -1  -2  -3  195.05    2.69
   1  -2   3  180.89    2.48
  -1   2  -3  188.82    2.45
   1  -2   4   10.34    0.55
  -1   2  -4    6.52    0.43
   1   2   4    6.44    0.42
  -1   2  -4    9.87    0.37
  -1   2  -4    6.17    0.32
  -1  -2  -4    6.78    0.47
   1   2   4    6.66    0.40
   1  -2   4   11.63    0.43
  -1  -2  -4    6.48    0.53
   1   2   4   12.04    0.67
   1  -2   5  129.85    2.32
   1   2   5  128.39    2.06
   1   2   5  128.79    2.48
  -1  -2  -5  123.88    2.43
  -1   2  -5  126.69    2.18
  -1   2  -5  127.08    1.67
   1   2   5  126.63    2.23
   1  -2   5  125.56    1.72
   1   2   5  130.47    1.97
  -1  -2  -5  132.28    2.27
   1  -2   6  684.39    8.08
   1   2   6  669.49    7.47
  -1   2  -6  682.39    6.83
  -1  -2  -6  685.82    7.92
   1   2   6  677.49    7.29
   1  -2   6  671.93    6.82
   1   2   6  665.23    7.82
  -1   2  -6  663.84    7.85
  -1  -2  -6  679.30    8.26
   1  -2   7  809.42    9.62
  -1  -2  -7  805.62    9.76
  -1   2  -7  800.58    9.37
   1   2   7  805.60    8.76
   1   2   7  802.26    8.50
   1   2   7  803.78    9.24
  -1   2  -7  814.22    8.77
  -1  -2  -7  817.50    9.36
   1  -2   8  267.47    4.42
  -1  -2  -8  273.06    4.51
  -1   2  -8  263.32    4.17
   1   2   8  256.78    3.50
   1   2   8  266.33    3.17
  -1   2  -8  259.13    3.64
  -1  -2  -8  259.04    4.11
   1  -2   9  572.15    7.72
  -1  -2  -9  554.42    7.68
  -1   2  -9  564.30    7.37
   1   2   9  563.96    6.37
   1   2   9  544.41    5.71
  -1   2  -9  545.95    6.62
  -1  -2  -9  535.35    7.15
   1  -2  10 2688.89   28.53
   1   2  10 2708.61   28.72
  -1   2 -10 2709.07   28.08
  -1  -2 -10 2657.68   28.47
   1   2  10 2626.20   26.60
  -1   2 -10 2700.86   27.15
  -1  -2 -10 2696.41   27.79
   1  -2  11  252.67    4.87
   1   2  11  252.07    5.01
  -1   2 -11  251.87    4.55
  -1  -2 -11  253.21    4.83
   1   2  11  239.38    3.38
  -1   2 -11  248.82    3.91
  -1  -2 -11  248.46    4.32
   1  -2  12   21.09    1.53
   1   2  12   22.70    1.66
  -1   2 -12   19.76    1.36
   1   2  12   20.75    0.84
  -1   2 -12   22.24    1.12
  -1  -2 -12   20.70    1.28
   1   2  13   12.77    1.53
   1  -2  13   15.53    1.47
  -1  -2 -13   13.85    1.19
  -1   2 -13   15.32    1.01
   1   2  13   14.86    0.72
   1  -2  14   53.35    2.46
   1   2  14   56.55    2.65
  -1  -2 -14   52.51    2.01
  -1  -3  14  196.59    4.85
   1   3 -14  197.81    3.95
   1  -3 -14  197.82    4.41
  -1   3  14  194.45    3.05
  -1  -3  13  241.28    5.29
  -1   3  13  241.87    3.64
   1   3 -13  242.90    4.40
   1  -3 -13  244.20    4.88
   1   3 -12    0.22    0.77
  -1   3  12    0.65    0.51
   1  -3 -12   -0.14    0.81
   1   3 -12    0.61    0.62
   1   3 -12    0.62    0.65
  -1  -3  12    0.69    0.90
  -1   3  11   11.21    0.51
   1   3 -11   10.92    1.07
  -1   3  11   11.45    1.30
   1  -3 -11   10.91    1.22
  -1  -3  11   10.58    1.19
   1  -3 -11   12.83    1.16
  -1   3  10  132.16    2.07
   1  -3 -10  134.40    3.23
   1   3 -10  135.65    3.15
   1  -3 -10  134.29    3.33
  -1  -3  10  135.25    3.40
  -1   3  10  136.38    3.47
   1  -3  -9  482.28    6.87
  -1   3   9  474.69    5.50
   1   3  -9  459.29    6.68
  -1  -3   9  462.65    7.04
  -1   3   9  475.28    7.13
   1  -3  -9  468.86    6.96
   1  -3  -8   23.24    1.29
   1  -3  -8   21.08    1.21
   1   3  -8   23.30    0.62
   1   3  -8   23.01    0.63
  -1   3   8   22.55    0.81
   1  -3  -8   23.35    0.86
  -1  -3   8   22.96    1.28
  -1   3   8   22.23    1.31
   1   3  -8   23.31    1.22
   1  -3  -7  371.74    5.50
   1   3  -7  370.49    5.03
   1  -3  -7  380.16    5.59
  -1   3   7  375.20    4.62
   1   3  -7  376.16    4.35
   1  -3  -7  377.22    4.76
  -1   3   7  378.11    5.64
  -1  -3   7  381.16    5.60
   1  -3  -6    2.36    0.54
  -1   3   6    3.31    0.61
   1  -3  -6    2.96    0.58
  -1   3   6    3.94    0.44
   1  -3  -6    2.57    0.43
   1   3  -6    3.10    0.36
   1   3  -6    3.40    0.61
  -1  -3   6    3.29    0.56
   1   3  -5  319.47    4.67
   1   3  -5  348.41    3.74
   1   3  -5  332.91    4.37
   1  -3  -5  331.68    4.73
  -1   3   5  320.72    4.70
  -1   3   5  333.72    4.28
   1  -3  -5  332.26    4.37
   1   3  -5  335.35    4.08
   1  -3  -5  324.31    4.74
   1   3  -4   65.07    1.60
   1   3  -4   66.53    1.12
   1   3  -4   66.40    1.45
  -1   3   4   69.75    1.63
  -1   3   4   71.33    1.50
  -1   3   4   67.56    1.61
   1  -3  -4   70.06    1.55
   1   3  -4   68.96    1.36
   1  -3  -4   67.83    1.67
   1   3  -3  901.07    9.79
  -1   3   3  877.70    9.73
   1   3  -3  920.45    9.14
   1  -3  -3  888.64    9.77
  -1   3   3  893.71    9.82
   1   3  -3  900.83    9.48
   1  -3  -3  883.05    9.86
   1   3  -3  864.23    9.54
  -1   3   2  388.77    4.69
   1   3  -2  394.55    4.40
   1   3  -2  391.66    4.75
   1   3  -2  395.52    4.63
   1  -3  -2  387.64    4.88
   1   3  -2  396.08    4.69
  -1   3   2  398.03    4.83
   1  -3  -2  380.76    4.83
   1   3   0 2945.43   28.84
  -1  -3   0 2964.58   28.86
  -1   3   0 2960.04   29.07
   1   3   0 2952.52   29.00
  -1   3   0 2974.82   28.77
   1   3   0 2956.11   28.83
   1   3   1    1.48    0.30
  -1  -3  -1    1.94    0.31
   1   3   1    1.80    0.33
  -1   3  -1    2.02    0.24
   1   3   2  974.44   10.37
   1   3   2  985.60   10.48
  -1   3  -2  974.72   10.29
  -1  -3  -2  993.98   10.37
  -1   3  -2  967.82    9.87
   1   3   2  978.82   10.39
  -1   3  -2  999.51    9.91
  -1   3  -3 1005.29   10.20
  -1  -3  -3 1023.31   10.87
   1  -3   3 1025.28   10.44
   1  -3   3  986.79   10.28
   1   3   3 1029.02   11.08
  -1   3  -3 1022.68   10.61
   1  -3   3 1017.63   10.71
  -1   3  -3 1011.49   10.46
  -1  -3  -4    0.21    0.31
  -1   3  -4    0.95    0.20
   1   3   4   -0.20    0.35
  -1  -3  -4    0.36    0.35
  -1   3  -4    1.29    0.27
   1   3   4    0.27    0.29
   1  -3   4    0.45    0.25
   1  -3   4    0.51    0.26
  -1   3  -4    0.70    0.29
   1  -3   5  412.45    5.21
  -1   3  -5  406.81    5.09
  -1  -3  -5  411.86    5.55
   1   3   5  419.62    5.65
   1   3   5  407.05    5.14
  -1   3  -5  409.49    4.66
  -1   3  -5  418.27    4.73
   1   3   5  413.38    5.07
   1  -3   5  413.21    4.80
   1   3   5  403.52    5.33
  -1  -3  -5  411.06    5.37
  -1  -3  -6    0.73    0.48
   1   3   6    0.61    0.47
  -1   3  -6    0.69    0.38
   1   3   6    1.19    0.43
  -1  -3  -6    0.74    0.42
   1   3   6    0.64    0.38
  -1   3  -6    0.80    0.24
   1  -3   6    1.33    0.25
   1   3   6    0.68    0.32
   1  -3   6    0.86    0.39
   1  -3   7  188.82    3.37
  -1  -3  -7  187.98    3.56
  -1   3  -7  190.80    3.18
   1   3   7  191.42    2.98
  -1   3  -7  192.07    2.73
   1   3   7  187.47    2.83
  -1   3  -7  184.62    2.35
   1   3   7  194.91    3.29
  -1  -3  -7  193.81    3.35
   1  -3   8  845.27    9.97
  -1   3  -8  802.93    9.58
  -1  -3  -8  828.14   10.19
   1   3   8  818.63    9.11
  -1   3  -8  788.91    8.04
  -1   3  -8  811.25    8.87
   1   3   8  824.19    8.85
   1   3   8  831.88    9.66
  -1  -3  -8  826.11    9.79
   1  -3   9 1726.49   18.93
   1   3   9 1718.83   17.72
  -1   3  -9 1718.55   17.62
  -1   3  -9 1707.80   18.49
  -1  -3  -9 1718.12   19.12
   1   3   9 1688.12   17.27
  -1   3  -9 1707.71   17.68
  -1  -3  -9 1724.20   18.63
   1  -3  10 1174.34   14.06
  -1   3 -10 1184.77   13.63
  -1  -3 -10 1156.00   14.13
   1   3  10 1210.97   12.67
  -1   3 -10 1175.54   12.65
   1   3  10 1159.62   11.95
  -1   3 -10 1171.17   12.74
  -1  -3 -10 1181.68   13.66
   1  -3  11  131.16    3.29
   1   3  11  130.11    3.49
   1   3  11  128.70    2.34
   1   3  11  120.74    1.61
   1   3  11  123.87    1.58
  -1   3 -11  131.57    2.43
  -1   3 -11  126.79    2.48
  -1   3 -11  127.97    3.05
  -1  -3 -11  129.18    3.37
  -1  -3 -11  129.69    3.05
   1  -3  12  121.17    3.32
   1   3  12  124.56    3.58
  -1   3 -12  125.05    3.14
  -1   3 -12  126.60    2.56
  -1  -3 -12  124.95    3.07
   1   3  12  125.00    2.32
   1   3  13  114.43    3.59
   1  -3  13  111.68    3.34
  -1   3 -13  110.41    2.44
  -1  -3 -13  113.00    2.96
   1   3  13  116.38    2.20
   1  -3  14   57.13    2.52
   1   3  14   57.65    2.71
  -1  -3 -14   55.47    2.12
  -1  -4  14  211.65    5.02
   1   4 -14  221.12    4.16
   1  -4 -14  219.31    4.78
  -1   4  14  209.65    3.48
  -1  -4  13  478.83    7.98
  -1   4  13  489.10    6.37
   1   4 -13  485.44    6.96
   1  -4 -13  475.93    7.67
   1  -4 -12    3.24    0.92
  -1   4  12    3.56    0.72
   1   4 -12    5.28    0.80
  -1   4  12    4.13    0.45
   1   4 -12    3.40    0.94
  -1   4  12    3.83    1.18
  -1  -4  12    4.53    1.09
   1  -4 -11   50.78    2.07
  -1   4  11   49.51    1.25
   1   4 -11   45.60    1.62
   1   4 -11   45.86    1.92
  -1   4  11   46.64    2.20
  -1  -4  11   47.87    2.11
   1  -4 -10    0.30    0.73
   1   4 -10    0.97    0.19
   1   4 -10    0.24    0.16
  -1   4  10    0.29    0.42
   1  -4 -10    1.06    0.79
   1   4 -10    0.11    0.68
  -1   4  10    0.19    0.85
   1   4 -10    0.64    0.56
  -1  -4  10   -0.09    0.72
   1  -4  -9    0.39    0.69
   1   4  -9    0.58    0.53
   1   4  -9    0.63    0.66
   1  -4  -9    0.89    0.74
  -1   4   9    1.41    0.78
  -1   4   9    0.50    0.41
   1   4  -9    0.47    0.29
   1  -4  -9    0.87    0.43
  -1  -4   9    0.40    0.69
   1  -4  -8   22.64    1.29
  -1   4   8   20.70    1.32
   1  -4  -8   21.23    1.26
  -1   4   8   22.26    0.93
   1   4  -8   24.56    0.81
  -1   4   8   23.20    1.24
   1  -4  -8   22.99    0.98
  -1  -4   8   21.96    1.27
   1   4  -8   21.13    1.23
   1  -4  -7  834.77   10.26
   1   4  -7  820.18    9.53
   1  -4  -7  845.29   10.27
  -1   4   7  831.06   10.26
  -1   4   7  829.57    9.37
   1   4  -7  825.17    9.05
   1  -4  -7  828.62    9.49
   1   4  -7  829.69   10.07
  -1  -4   7  844.44   10.17
   1   4  -6 2156.81   22.34
   1   4  -6 2111.12   20.84
   1   4  -6 2134.98   21.80
  -1  -4   6 2127.33   22.34
  -1   4   6 2133.70   22.49
  -1   4   6 2128.81   21.80
   1  -4  -6 2141.16   21.93
   1   4  -6 2097.32   21.47
   1  -4  -6 2170.12   22.55
   1   4  -5 1672.55   17.74
   1   4  -5 1648.66   16.56
   1   4  -5 1670.15   17.26
  -1  -4   5 1690.58   17.67
  -1   4   5 1673.69   17.81
  -1   4   5 1681.87   17.39
   1   4  -5 1649.39   17.15
   1  -4  -5 1663.61   17.52
   1  -4  -5 1672.04   17.91
   1   4  -4 1470.14   15.54
   1   4  -4 1450.63   14.62
  -1  -4   4 1446.56   15.43
   1   4  -4 1453.15   15.15
  -1   4   4 1477.93   15.59
  -1   4   4 1479.16   15.42
   1  -4  -4 1465.49   15.53
  -1   4   4 1444.53   15.61
   1   4  -4 1442.99   15.19
   1  -4  -4 1461.24   15.71
   1   4  -3  895.29   10.09
   1   4  -3  914.15    9.52
  -1   4   3  908.54   10.13
   1   4  -3  915.25    9.87
   1   4  -3  917.92   10.03
  -1   4   3  930.92   10.27
   1  -4  -3  908.93   10.32
   1  -4  -3  924.47   10.32
   1   4  -2  444.20    5.12
   1   4  -2  441.00    5.42
   1   4  -2  444.67    5.28
  -1   4   2  437.21    5.37
   1  -4  -2  447.13    5.72
   1   4  -2  444.64    5.50
  -1   4   2  446.46    5.54
   1  -4  -2  443.03    5.55
   1   4  -1  678.10    7.56
  -1  -4   1  675.00    7.67
  -1   4   1  702.68    7.51
  -1   4   1  689.30    7.96
   1  -4  -1  673.15    8.03
   1   4  -1  688.02    7.85
   1   4  -1  674.17    7.59
  -1   4   1  684.22    7.72
   1   4   0  888.26    9.60
  -1   4   0  894.26    9.87
  -1  -4   0  875.30    9.63
   1  -4   0  877.72    9.96
   1   4   0  889.21    9.83
   1   4   0  888.13    9.58
  -1   4   0  890.62    9.54
   1   4   1 2937.09   29.09
  -1   4  -1 2923.55   29.21
   1   4   1 2914.32   29.04
  -1  -4  -1 2907.73   29.03
  -1   4  -1 2923.46   28.78
   1   4   1 2931.37   29.26
  -1   4  -2 5515.70   53.87
   1   4   2 5499.02   53.87
  -1  -4  -2 5557.94   53.83
  -1   4  -3 1465.89   14.81
  -1  -4  -3 1491.19   15.53
   1  -4   3 1478.84   14.93
   1   4   3 1478.03   15.69
  -1   4  -3 1499.51   15.34
   1  -4   3 1438.57   15.44
  -1   4  -3 1461.74   14.97
  -1  -4  -4  415.10    5.45
  -1   4  -4  418.10    4.72
   1  -4   4  403.66    4.95
   1  -4   4  406.56    4.84
   1   4   4  415.09    5.61
  -1   4  -4  402.97    5.08
   1  -4   4  423.96    5.20
   1   4   4  413.82    5.37
  -1   4  -4  413.58    5.03
   1   4   5   23.90    0.99
  -1   4  -5   22.26    0.70
   1  -4   5   23.51    0.90
   1   4   5   22.33    1.11
  -1  -4  -5   21.63    1.06
  -1   4  -5   24.07    0.85
   1  -4   5   23.68    0.88
   1   4   5   26.96    1.03
   1   4   5   25.83    1.10
  -1  -4  -5   22.45    1.02
  -1   4  -6   13.55    0.78
   1  -4   6   17.99    0.88
  -1   4  -6   17.42    0.38
   1   4   6   14.18    0.82
  -1   4  -6   17.63    0.67
  -1  -4  -6   14.35    0.96
   1   4   6   16.30    1.04
  -1   4  -6   14.37    0.65
   1  -4   6   15.47    0.70
   1   4   6   16.55    0.85
   1   4   6   14.82    0.90
  -1  -4  -6   15.58    0.95
  -1   4  -7  334.01    4.69
   1  -4   7  332.92    4.88
   1   4   7  331.81    4.67
  -1   4  -7  338.10    4.18
  -1  -4  -7  330.68    5.22
   1   4   7  335.76    5.34
   1   4   7  336.95    4.59
  -1   4  -7  333.73    4.06
   1   4   7  328.88    4.97
  -1  -4  -7  322.47    4.99
   1  -4   8  777.26    9.73
  -1  -4  -8  812.93   10.21
   1   4   8  816.53   10.32
  -1   4  -8  786.53    9.48
   1   4   8  802.65    9.31
  -1   4  -8  797.30    8.79
   1   4   8  800.16    9.11
  -1   4  -8  800.78    8.40
   1   4   8  822.07    9.79
  -1  -4  -8  798.09    9.85
   1  -4   9  324.98    5.24
  -1  -4  -9  333.92    5.57
  -1   4  -9  325.93    4.99
   1   4   9  330.01    4.65
  -1   4  -9  322.79    3.63
  -1   4  -9  328.40    4.30
   1   4   9  326.91    4.40
   1   4   9  328.14    5.11
  -1  -4  -9  328.48    5.25
   1  -4  10 2006.89   22.03
   1   4  10 2004.50   20.87
  -1   4 -10 2012.74   20.56
  -1  -4 -10 2023.15   22.40
  -1   4 -10 2023.99   21.60
   1   4  10 2008.09   20.43
  -1   4 -10 2013.27   20.70
  -1  -4 -10 2013.64   21.90
   1  -4  11  318.32    5.47
   1   4  11  313.56    4.44
  -1   4 -11  297.13    4.19
   1   4  11  298.38    3.82
  -1  -4 -11  307.38    5.24
  -1   4 -11  299.74    4.33
  -1   4 -11  291.95    5.02
   1  -4  12   13.05    1.27
   1   4  12   14.41    1.48
  -1   4 -12   14.08    1.17
   1   4  12   12.89    0.53
  -1   4 -12   12.37    0.87
  -1  -4 -12   15.24    1.27
   1   4  12   14.28    0.90
   1   4  13   41.64    1.40
  -1  -4 -13   42.85    1.92
   1   4  13   45.22    2.37
   1  -4  13   41.95    2.07
  -1  -4 -14   78.47    2.61
   1  -4  14   81.46    2.91
   1  -5 -14   14.17    1.50
  -1  -5  14   13.14    1.53
   1  -5 -13    3.58    1.13
  -1   5  13    2.67    0.76
  -1   5  13    3.41    1.23
   1   5 -13    2.46    0.84
  -1  -5  13    3.88    1.12
   1   5 -12  135.36    3.38
  -1   5  12  125.89    2.83
  -1   5  12  132.69    2.36
   1   5 -12  132.95    2.87
   1  -5 -12  129.15    3.53
  -1   5  12  134.28    3.84
  -1  -5  12  132.45    3.57
   1   5 -11   37.15    1.45
  -1   5  11   34.44    1.18
   1  -5 -11   36.41    1.86
  -1   5  11   37.14    2.03
   1   5 -11   35.47    1.72
  -1  -5  11   38.47    1.87
   1   5 -10   56.47    1.75
   1  -5 -10   55.26    2.19
   1   5 -10   56.58    1.23
  -1   5  10   56.59    1.56
   1  -5 -10   61.04    2.28
  -1  -5  10   61.23    2.23
   1   5 -10   56.17    2.06
  -1   5  10   59.80    2.36
   1  -5  -9  215.38    4.36
  -1  -5   9  222.93    4.24
   1   5  -9  217.38    3.65
   1  -5  -9  215.18    4.33
  -1   5   9  215.66    4.43
  -1   5   9  214.16    3.47
   1   5  -9  214.97    3.13
  -1   5   9  217.54    4.16
   1  -5  -9  221.90    3.56
   1   5  -9  215.26    4.10
   1  -5  -8  515.76    7.53
  -1  -5   8  529.54    7.33
   1   5  -8  522.15    6.70
  -1   5   8  518.97    7.56
   1   5  -8  527.62    6.32
  -1   5   8  526.79    6.67
  -1   5   8  528.60    7.33
   1  -5  -8  516.19    6.74
   1   5  -8  525.19    7.27
   1   5  -7  597.43    7.95
   1   5  -7  624.98    6.52
  -1  -5   7  600.38    7.94
   1   5  -7  601.22    7.44
  -1   5   7  609.72    8.23
  -1   5   7  599.09    7.53
   1  -5  -7  606.68    7.65
   1   5  -7  614.93    7.26
   1  -5  -7  605.23    8.22
   1   5  -6  274.11    4.49
  -1   5   6  277.90    4.63
   1   5  -6  292.68    3.52
  -1  -5   6  278.98    4.41
   1   5  -6  284.07    4.12
  -1   5   6  271.94    4.26
   1  -5  -6  284.46    4.40
   1   5  -6  289.09    4.10
   1  -5  -6  281.40    4.70
  -1   5   5    1.02    0.51
   1  -5  -5    1.08    0.53
  -1   5   5    1.51    0.57
   1   5  -5    1.61    0.31
   1   5  -5    0.95    0.44
  -1   5   5    1.26    0.49
   1   5  -5    1.34    0.43
   1  -5  -5    1.52    0.49
   1   5  -5    1.35    0.56
   1   5  -4  500.72    6.41
   1   5  -4  497.16    5.68
  -1  -5   4  503.32    6.36
   1   5  -4  488.48    6.06
  -1   5   4  497.21    6.50
  -1   5   4  515.29    6.53
   1  -5  -4  498.68    6.59
   1   5  -4  490.01    6.28
  -1   5   4  507.15    6.59
   1  -5  -4  496.93    6.62
   1   5  -3  380.35    4.68
   1  -5  -3  377.37    5.05
  -1   5   3  390.26    5.18
   1   5  -3  389.60    4.94
   1   5  -3  380.79    5.11
   1   5  -3  392.65    5.20
   1  -5  -3  390.10    5.44
  -1   5   3  380.69    5.27
   1  -5  -3  386.74    5.34
   1   5  -2  681.99    7.75
   1   5  -2  678.76    8.00
  -1   5   2  708.77    8.01
   1   5  -2  686.55    8.24
   1  -5  -2  699.51    8.48
   1  -5  -2  695.22    8.24
  -1   5   2  693.70    8.21
   1   5  -2  703.44    7.92
   1   5  -1  135.29    2.33
  -1   5   1  141.28    2.30
  -1   5   1  132.90    2.60
   1  -5  -1  137.94    2.70
   1   5  -1  136.04    2.58
   1   5  -1  129.75    2.33
  -1   5   1  133.59    2.44
   1   5   0  143.59    2.50
  -1   5   0  139.51    2.68
  -1  -5   0  141.41    2.52
   1   5   0  142.41    2.69
   1  -5   0  142.40    2.76
  -1   5   0  146.75    2.47
   1   5   0  143.46    2.49
   1   5   1  289.31    4.14
  -1   5  -1  290.88    4.28
   1   5   1  292.28    4.33
   1   5   1  301.74    4.16
  -1  -5  -1  288.06    4.13
   1  -5   1  291.29    3.87
  -1   5  -1  291.66    3.91
  -1   5  -2  139.25    2.64
   1   5   2  140.52    2.64
  -1   5  -2  142.87    2.20
   1  -5   2  147.53    2.32
  -1  -5  -2  143.17    2.60
   1   5   2  146.06    2.66
  -1   5  -2  145.44    2.33
  -1  -5  -3  197.69    3.30
  -1   5  -3  193.73    2.80
   1   5   3  188.65    3.28
   1  -5   3  198.49    2.88
   1   5   3  191.70    3.35
  -1   5  -3  195.31    3.19
   1  -5   3  186.98    3.25
  -1   5  -3  196.34    2.85
  -1  -5  -4  384.87    5.44
  -1   5  -4  396.55    4.77
   1  -5   4  393.51    4.93
   1   5   4  403.70    5.69
  -1   5  -4  393.85    5.22
   1  -5   4  400.99    5.33
   1   5   4  406.20    5.52
  -1   5  -4  399.59    5.02
  -1   5  -5  234.78    3.52
   1   5   5  232.88    3.79
   1  -5   5  235.95    3.44
   1   5   5  239.31    4.12
  -1   5  -5  233.77    3.53
   1   5   5  229.54    3.80
   1  -5   5  240.15    3.62
  -1  -5  -5  237.55    3.94
  -1   5  -5  236.41    3.18
  -1   5  -6   20.89    0.95
  -1   5  -6   22.87    0.62
   1   5   6   19.77    1.04
  -1   5  -6   20.54    0.77
   1  -5   6   21.79    0.97
   1   5   6   25.01    1.31
  -1  -5  -6   26.34    1.28
  -1   5  -6   21.53    0.91
   1   5   6   20.58    1.11
   1  -5   6   22.87    0.94
   1   5   6   22.01    1.05
  -1  -5  -6   21.82    1.14
  -1   5  -7   42.44    1.40
  -1   5  -7   41.32    0.67
   1   5   7   45.71    1.51
   1  -5   7   42.50    1.43
  -1   5  -7   44.42    1.15
  -1  -5  -7   41.46    1.66
   1   5   7   41.16    1.75
  -1   5  -7   42.63    1.20
   1   5   7   43.83    1.46
   1   5   7   44.88    1.64
  -1  -5  -7   43.45    1.64
  -1   5  -8 1252.53   13.81
   1  -5   8 1247.31   14.00
   1   5   8 1249.78   13.84
  -1   5  -8 1239.72   13.02
   1   5   8 1222.98   14.77
  -1  -5  -8 1215.01   14.54
   1   5   8 1240.03   13.70
  -1   5  -8 1243.52   12.97
   1   5   8 1236.98   14.24
  -1  -5  -8 1269.33   14.42
   1  -5   9 1383.64   15.23
  -1   5  -9 1334.45   14.86
  -1  -5  -9 1314.26   15.68
   1   5   9 1311.61   15.88
   1   5   9 1335.71   14.69
  -1   5  -9 1341.58   13.98
   1   5   9 1348.14   14.51
  -1   5  -9 1323.30   13.63
   1   5   9 1294.89   15.24
  -1  -5  -9 1333.10   15.42
   1  -5  10   77.24    2.36
  -1   5 -10   79.14    2.21
  -1  -5 -10   79.51    2.60
   1   5  10   76.02    2.02
  -1   5 -10   76.93    1.28
  -1   5 -10   76.85    1.71
   1   5  10   80.17    1.90
   1   5  10   79.26    2.37
  -1  -5 -10   78.37    2.45
   1  -5  11  202.98    4.17
   1   5  11  201.09    3.51
  -1   5 -11  193.19    3.08
   1   5  11  202.07    3.18
  -1  -5 -11  199.86    4.18
  -1   5 -11  202.92    3.29
  -1   5 -11  200.56    3.90
   1  -5  12  187.90    4.14
  -1   5 -12  188.48    3.89
   1   5  12  189.20    2.85
  -1   5 -12  185.10    3.17
  -1  -5 -12  188.66    4.09
   1   5  12  187.33    3.35
   1   5  13   31.71    1.33
   1  -5  13   30.25    1.80
  -1  -5 -13   28.96    1.69
  -1  -6  13  183.86    4.38
  -1   6  13  183.15    3.62
   1  -6 -13  185.97    4.46
  -1   6  12  158.41    3.36
  -1  -6  12  146.43    3.77
   1  -6 -12  144.70    3.89
  -1   6  12  157.77    4.23
  -1   6  12  156.28    2.83
   1   6 -11   64.88    1.90
  -1  -6  11   62.83    2.35
   1  -6 -11   65.88    2.52
  -1   6  11   62.34    2.60
   1   6 -11   66.00    2.29
  -1   6  11   63.04    1.76
  -1  -6  10   21.74    1.40
   1   6 -10   21.94    1.15
   1   6 -10   18.69    0.85
  -1   6  10   19.44    1.06
   1  -6 -10   20.10    1.48
  -1   6  10   19.27    1.52
   1   6 -10   18.85    1.36
   1  -6  -9   68.74    2.45
  -1  -6   9   64.57    2.17
   1   6  -9   67.95    1.85
  -1   6   9   66.51    2.42
  -1   6   9   64.67    1.87
   1   6  -9   65.91    1.66
   1  -6  -9   64.36    1.88
  -1   6   9   70.56    2.32
   1   6  -9   64.02    2.16
   1   6  -8  320.59    5.19
   1   6  -8  303.87    3.63
   1   6  -8  318.58    4.63
  -1  -6   8  314.49    5.12
  -1   6   8  314.20    5.47
  -1   6   8  306.52    4.74
   1   6  -8  306.65    4.48
  -1   6   8  320.32    5.31
   1  -6  -8  320.76    4.89
   1  -6  -8  320.96    5.50
   1   6  -7  760.75    9.57
   1   6  -7  764.58    8.91
  -1  -6   7  768.43    9.44
  -1   6   7  771.02    9.85
  -1   6   7  754.57    9.25
   1   6  -7  741.31    8.91
   1  -6  -7  766.44    9.35
   1  -6  -7  762.30    9.89
   1   6  -6 1210.59   13.86
   1   6  -6 1189.66   12.57
   1   6  -6 1235.78   13.26
  -1   6   6 1210.26   14.10
  -1   6   6 1212.07   13.71
   1   6  -6 1219.23   13.46
   1  -6  -6 1209.91   13.85
   1  -6  -6 1242.19   14.22
   1   6  -5  357.11    5.34
   1   6  -5  373.78    4.55
   1   6  -5  367.48    4.96
  -1   6   5  372.34    5.53
   1  -6  -5  359.00    5.36
  -1   6   5  364.02    5.39
   1  -6  -5  366.93    5.51
  -1   6   5  375.09    5.58
   1   6  -5  366.73    5.23
   1  -6  -5  359.58    5.59
   1   6  -4    1.55    0.50
  -1   6   4    1.40    0.51
   1   6  -4    1.60    0.47
  -1  -6   4    2.82    0.53
   1   6  -4    1.76    0.52
  -1   6   4    1.68    0.53
   1  -6  -4    2.23    0.59
  -1   6   4    1.33    0.54
  -1   6   3  835.39    9.78
   1   6  -3  834.08    9.25
  -1  -6   3  830.76    9.77
   1   6  -3  815.43    9.69
   1   6  -3  829.03    9.90
   1  -6  -3  843.57   10.18
   1  -6  -3  848.82   10.01
   1   6  -3  841.73    9.49
  -1   6   3  838.10    9.96
  -1   6   2    2.67    0.58
   1   6  -2    1.53    0.43
  -1   6   2    2.91    0.52
   1   6  -2    1.85    0.55
   1  -6  -2    2.55    0.59
   1   6  -2    2.77    0.53
   1   6  -1  621.70    7.40
  -1   6   1  625.05    7.32
  -1   6   1  627.62    7.92
   1   6  -1  616.39    7.85
   1  -6  -1  598.00    7.95
  -1   6   1  616.70    7.57
   1   6  -1  615.11    7.47
   1   6   0  603.31    7.29
  -1  -6   0  571.13    7.27
  -1   6   0  605.40    7.64
  -1   6   0  586.88    6.89
   1   6   0  601.77    7.64
   1  -6   0  596.63    7.75
   1   6   0  605.39    7.29
  -1   6   0  577.81    7.24
   1   6   1 1348.57   14.70
  -1   6  -1 1373.63   14.97
   1   6   1 1337.52   15.03
   1   6   1 1367.22   14.71
  -1   6  -1 1341.24   14.39
   1  -6   1 1387.30   14.40
  -1  -6  -1 1310.97   14.65
  -1   6  -2   42.11    1.48
   1   6   2   44.88    1.47
   1  -6   2   44.59    1.26
  -1   6  -2   45.48    1.19
  -1   6  -2   40.88    1.23
   1   6   2   43.26    1.46
  -1  -6  -2   42.09    1.42
  -1  -6  -3 2057.99   21.68
   1   6   3 2031.62   21.73
  -1   6  -3 2053.09   21.00
   1  -6   3 2085.06   21.08
   1   6   3 2029.91   21.77
  -1   6  -3 2084.33   21.65
   1  -6   3 2047.79   21.75
  -1   6  -3 2095.11   20.99
  -1   6  -4  144.80    2.43
  -1  -6  -4  140.38    2.92
   1  -6   4  142.43    2.52
   1   6   4  144.30    3.02
  -1   6  -4  144.59    2.79
   1  -6   4  144.37    2.87
   1   6   4  142.85    2.98
  -1   6  -4  141.23    2.52
  -1  -6  -5   41.65    1.57
  -1   6  -5   42.01    1.18
   1  -6   5   42.91    1.29
  -1   6  -5   42.08    1.39
  -1   6  -5   42.16    1.32
   1  -6   5   45.16    1.47
   1   6   5   44.99    1.59
   1   6   5   45.60    1.73
  -1   6  -6   32.26    1.21
  -1   6  -6   31.15    0.88
   1   6   6   30.54    1.35
   1   6   6   35.57    1.60
  -1   6  -6   30.44    1.17
   1   6   6   34.70    1.40
   1  -6   6   30.58    1.20
  -1   6  -6   31.77    1.02
   1   6   6   30.61    1.41
  -1  -6  -6   30.66    1.43
  -1   6  -7  195.65    3.39
   1   6   7  186.86    4.00
  -1   6  -7  195.27    2.44
   1   6   7  191.89    3.58
   1  -6   7  196.62    3.36
   1   6   7  188.82    3.56
  -1   6  -7  201.19    3.22
   1   6   7  188.48    3.76
  -1  -6  -7  188.17    3.78
  -1   6  -7  191.09    2.93
   1   6   8    0.81    0.80
  -1   6  -8    0.08    0.58
   1   6   8    0.67    0.72
  -1  -6  -8    0.77    0.77
   1   6   8    0.31    0.67
  -1   6  -8    0.30    0.45
  -1   6  -8    0.38    0.48
   1   6   8   -0.03    0.59
   1  -6   8    0.26    0.58
  -1   6  -9  576.69    7.52
   1   6   9  572.94    7.56
   1  -6   9  575.52    7.66
  -1   6  -9  568.46    6.74
  -1  -6  -9  561.93    8.22
   1   6   9  555.17    8.44
   1   6   9  577.16    7.47
  -1   6  -9  572.34    6.71
   1   6   9  569.79    7.98
  -1  -6  -9  566.88    8.10
   1  -6  10   57.79    2.00
  -1   6 -10   62.18    1.52
   1   6  10   55.27    1.84
  -1   6 -10   60.52    1.35
   1   6  10   57.90    1.76
   1   6  10   56.60    2.41
  -1   6 -10   60.42    1.94
  -1  -6 -10   59.56    2.20
   1  -6  11 1153.12   13.91
   1   6  11 1172.58   13.33
   1   6  11 1166.39   12.97
  -1   6 -11 1164.81   13.67
   1   6  11 1169.75   14.93
  -1  -6 -11 1165.55   14.31
   1  -6  12  277.54    5.16
   1   6  12  287.94    4.60
   1   6  12  281.83    4.13
  -1   6 -12  283.96    4.96
  -1  -6 -12  277.50    5.33
   1   6  13   45.07    1.64
   1  -6  13   43.62    2.03
  -1  -6 -13   41.95    2.05
  -1  -7  13   85.57    2.90
   1  -7 -13   80.99    3.07
   1  -7 -12    1.61    1.05
  -1   7  12    0.81    0.65
  -1   7  12    1.62    1.19
  -1  -7  12    1.13    1.00
  -1   7  11   20.10    1.19
   1   7 -11   22.30    1.17
  -1  -7  11   19.50    1.46
   1  -7 -11   21.05    1.66
  -1   7  11   19.93    1.67
   1   7 -11   23.89    1.54
   1  -7 -10   39.41    2.00
   1   7 -10   36.68    1.43
  -1  -7  10   40.08    1.82
   1   7 -10   36.59    1.29
  -1   7  10   39.19    1.55
   1   7 -10   36.05    1.78
  -1   7  10   36.02    1.99
  -1   7   9    2.30    0.92
   1  -7  -9    2.22    0.95
   1   7  -9    2.01    0.30
   1   7  -9    1.44    0.62
  -1   7   9    1.14    0.70
   1   7  -9    1.62    0.58
   1   7  -9    3.02    0.81
   1   7  -8   93.02    2.59
   1   7  -8   93.69    1.67
   1   7  -8   93.36    2.20
   1  -7  -8   98.07    2.76
  -1   7   8   89.54    2.77
   1   7  -8   89.70    2.21
  -1   7   8   94.57    2.45
   1  -7  -8   88.84    2.41
   1  -7  -8   87.33    2.74
   1   7  -7  438.78    6.53
   1   7  -7  449.70    5.35
   1   7  -7  447.25    5.96
  -1   7   7  434.50    6.78
   1  -7  -7  448.53    6.68
  -1   7   7  437.80    6.42
   1   7  -7  445.33    6.18
   1  -7  -7  447.36    6.52
   1  -7  -7  436.90    6.86
   1   7  -6   36.56    1.55
   1   7  -6   41.70    1.16
   1   7  -6   41.15    1.40
  -1   7   6   39.28    1.71
  -1   7   6   39.16    1.58
  -1   7   6   38.26    1.67
   1  -7  -6   39.00    1.63
   1   7  -6   41.84    1.54
   1  -7  -6   37.40    1.73
   1   7  -5  168.85    3.33
   1   7  -5  170.38    2.72
  -1  -7   5  170.32    3.32
  -1   7   5  172.84    3.50
  -1   7   5  166.66    3.42
  -1   7   5  171.89    3.53
   1  -7  -5  169.80    3.53
   1   7  -5  171.06    3.31
   1  -7  -5  168.22    3.54
   1   7  -5  166.20    3.03
   1   7  -4  551.34    7.25
   1   7  -4  538.92    6.59
  -1  -7   4  555.48    7.29
  -1   7   4  560.30    7.41
  -1   7   4  558.92    7.57
   1   7  -4  550.89    7.39
   1  -7  -4  555.61    7.67
   1   7  -4  549.13    6.95
  -1   7   4  551.72    7.50
   1  -7  -4  556.74    7.58
   1   7  -3  216.56    3.32
  -1   7   3  209.52    3.65
  -1  -7   3  211.98    3.70
   1   7  -3  200.14    3.54
   1   7  -3  205.19    3.77
   1  -7  -3  200.67    3.94
  -1   7   3  208.00    3.79
   1  -7  -3  200.68    3.77
   1   7  -3  209.44    3.46
   1   7  -2 1256.88   13.68
  -1  -7   2 1241.89   14.01
  -1   7   2 1273.71   13.89
   1  -7  -2 1274.24   14.60
   1   7  -2 1253.85   14.33
   1   7  -2 1244.64   13.79
  -1   7   2 1269.44   14.18
   1   7  -1 1315.25   14.36
  -1   7   1 1319.80   14.98
  -1   7   1 1266.47   14.20
   1  -7  -1 1335.25   15.13
   1   7  -1 1320.49   14.94
   1   7  -1 1325.29   14.43
  -1   7   1 1335.95   14.60
   1   7   0 1085.29   12.20
  -1   7   0 1067.25   11.78
  -1   7   0 1084.42   12.63
   1   7   0 1055.17   12.61
   1  -7   0 1073.42   12.75
   1   7   0 1094.26   12.25
   1  -7   0 1078.26   12.10
  -1   7   0 1071.54   12.17
   1   7   1   71.59    1.99
   1  -7   1   74.03    1.86
  -1   7  -1   71.59    2.11
   1   7   1   75.15    2.17
  -1  -7  -1   75.24    2.02
   1   7   1   77.14    2.05
   1  -7   2  205.01    3.33
   1   7   2  196.09    3.61
  -1   7  -2  200.68    3.72
   1   7   2  202.46    3.63
  -1  -7  -2  203.17    3.62
   1   7   2  191.85    3.63
  -1   7  -2  209.66    3.40
   1   7   3  149.48    3.07
   1  -7   3  145.35    2.74
  -1   7  -3  149.04    2.62
   1   7   3  149.75    3.13
  -1   7  -3  147.75    3.06
   1  -7   3  154.96    3.19
  -1   7  -3  146.65    2.68
   1   7   3  145.53    3.08
  -1  -7  -3  146.09    3.03
  -1  -7  -4   73.92    2.14
  -1   7  -4   73.47    1.75
   1   7   4   71.40    2.13
   1  -7   4   75.16    1.86
   1   7   4   74.14    2.22
  -1   7  -4   74.69    2.07
   1   7   4   77.04    2.24
   1  -7   4   74.10    2.11
  -1   7  -4   73.78    1.80
  -1  -7  -5   42.79    1.71
  -1   7  -5   43.42    1.31
   1  -7   5   42.62    1.39
  -1   7  -5   43.02    1.55
  -1   7  -5   43.82    1.41
   1  -7   5   40.70    1.52
   1   7   5   45.14    1.70
   1   7   5   43.20    1.76
  -1   7  -6    8.81    0.77
   1   7   6    8.67    1.02
   1   7   6    9.19    0.94
  -1   7  -6    9.97    0.61
   1   7   6    9.29    0.95
  -1   7  -6    9.93    0.82
   1  -7   6    9.46    0.84
   1   7   6   10.52    1.02
  -1   7  -6    9.99    0.69
  -1  -7  -6    8.27    0.96
  -1   7  -7  631.80    7.91
   1   7   7  618.56    8.86
  -1   7  -7  605.78    6.80
   1   7   7  626.58    8.27
   1   7   7  619.43    8.31
  -1   7  -7  646.82    7.87
   1   7   7  624.15    8.55
  -1  -7  -7  627.28    8.58
  -1   7  -7  628.91    7.37
  -1   7  -8  393.13    5.64
   1   7   8  397.51    6.62
  -1   7  -8  395.69    4.35
   1   7   8  390.81    5.93
  -1   7  -8  379.53    5.34
   1   7   8  386.06    5.92
   1   7   8  392.88    6.28
  -1  -7  -8  389.25    6.27
  -1   7  -8  388.31    5.09
   1   7   9  861.10   10.72
   1   7   9  846.52   11.65
   1   7   9  880.51   10.73
  -1   7  -9  883.93    9.94
  -1   7  -9  881.43   10.51
  -1   7  -9  866.22    9.75
  -1  -7  -9  865.44   11.30
   1  -7  10  596.76    8.03
   1   7  10  574.36    9.03
  -1   7 -10  607.96    7.94
   1   7  10  590.72    7.85
   1   7  10  588.11    7.95
  -1  -7 -10  593.21    8.67
   1  -7  11   40.32    1.77
   1   7  11   42.11    1.63
   1   7  11   44.42    1.73
  -1   7 -11   44.47    1.78
   1   7  11   44.51    2.27
  -1  -7 -11   43.15    2.09
  -1  -7 -12    5.31    1.20
   1  -7  12    8.96    1.14
   1  -8 -12   24.56    1.81
  -1   8  11    8.50    0.97
   1  -8 -11   10.50    1.37
  -1   8  11    8.99    1.43
  -1   8  10   10.55    1.02
   1   8 -10   10.84    1.28
  -1   8  10   11.25    1.38
   1  -8 -10   10.69    1.36
   1   8 -10   10.74    0.93
   1   8  -9  118.62    2.63
  -1   8   9  120.52    3.44
   1   8  -9  122.58    2.73
  -1   8   9  121.44    2.95
   1  -8  -9  119.73    3.42
   1   8  -9  117.26    3.11
   1   8  -8    5.90    0.94
   1   8  -8    6.72    0.59
   1   8  -8    5.56    0.80
  -1   8   8    6.59    0.94
   1  -8  -8    6.79    1.09
   1  -8  -8    5.77    0.91
   1   8  -8    6.29    0.82
  -1   8   8    6.89    1.08
   1   8  -7  389.65    6.11
  -1   8   7  389.47    6.41
   1   8  -7  394.27    5.03
   1   8  -7  390.31    5.89
  -1   8   7  392.29    6.13
   1  -8  -7  393.12    6.21
   1   8  -7  393.19    5.61
   1  -8  -7  395.12    6.53
   1   8  -6    8.66    0.95
   1   8  -6    9.14    0.69
  -1   8   6    9.84    1.06
  -1   8   6    9.62    1.02
   1   8  -6   11.08    0.97
   1  -8  -6    9.03    1.04
   1  -8  -6   10.28    1.13
  -1   8   6    9.58    1.05
   1   8  -6   10.08    0.90
   1   8  -5  160.73    3.32
   1   8  -5  154.02    2.71
  -1  -8   5  154.15    3.29
  -1   8   5  155.38    3.41
  -1   8   5  156.49    3.47
  -1   8   5  160.69    3.53
   1  -8  -5  153.15    3.51
   1   8  -5  158.18    3.35
   1   8  -5  156.39    3.04
   1  -8  -5  155.42    3.54
   1   8  -4  149.41    3.12
  -1   8   4  152.93    3.27
  -1  -8   4  152.40    3.22
   1   8  -4  153.38    2.76
  -1   8   4  147.02    3.35
   1   8  -4  147.94    3.28
   1  -8  -4  144.97    3.41
   1   8  -4  149.63    2.96
   1  -8  -4  153.90    3.37
  -1   8   4  153.71    3.38
  -1   8   3   76.45    2.15
   1   8  -3   81.17    2.14
  -1  -8   3   79.42    2.23
   1   8  -3   74.74    2.26
   1  -8  -3   73.48    2.38
  -1   8   3   76.22    2.26
   1   8  -3   76.00    2.05
  -1   8   2  166.59    3.17
  -1  -8   2  159.95    3.27
  -1   8   2  161.97    3.52
   1   8  -2  160.95    3.03
   1   8  -2  162.09    3.47
   1  -8  -2  164.88    3.63
  -1   8   2  162.33    3.34
   1   8  -2  156.93    3.10
  -1   8   1  654.01    8.09
   1   8  -1  667.26    8.24
  -1   8   1  666.65    8.85
   1   8  -1  650.37    8.79
   1  -8  -1  647.54    8.93
  -1   8   1  661.13    8.46
   1   8  -1  659.53    8.33
   1  -8  -1  640.60    8.32
   1   8   0    1.25    0.63
  -1   8   0    2.21    0.66
   1   8   0    1.06    0.60
  -1   8   0    0.94    0.48
  -1   8   0    1.29    0.73
   1  -8   0    0.28    0.67
   1  -8   0    0.38    0.58
   1   8   1   20.71    1.19
   1  -8   1   20.15    1.08
  -1   8  -1   19.78    1.25
   1   8   1   21.02    1.31
  -1   8  -1   21.66    1.12
   1   8   1   20.48    1.21
   1  -8   2   14.69    0.92
   1   8   2   14.06    1.06
  -1   8  -2   13.94    1.09
   1   8   2   17.65    1.13
  -1  -8  -2   15.16    1.10
  -1   8  -2   17.28    1.02
   1   8   2   15.19    1.13
   1   8   3   61.99    2.02
  -1   8  -3   63.16    1.68
   1  -8   3   64.27    1.80
   1   8   3   64.28    2.08
  -1   8  -3   60.48    2.01
   1  -8   3   62.57    2.08
   1   8   3   63.40    2.06
  -1  -8  -3   62.53    2.04
  -1   8  -3   61.73    1.76
  -1   8  -4  250.80    3.92
   1   8   4  250.08    4.44
   1  -8   4  251.40    4.04
   1   8   4  248.20    4.56
  -1   8  -4  244.01    4.36
   1  -8   4  246.67    4.45
   1   8   4  254.62    4.65
  -1   8  -4  247.78    3.92
   1   8   4  245.40    4.51
  -1  -8  -4  245.56    4.46
  -1   8  -5  382.45    5.35
  -1   8  -5  373.24    5.09
   1  -8   5  382.57    5.41
   1   8   5  379.37    6.14
  -1   8  -5  376.41    5.72
   1   8   5  382.06    6.06
   1  -8   5  379.45    5.78
  -1  -8  -5  377.51    5.98
  -1   8  -5  373.25    5.18
  -1   8  -6  139.37    2.84
   1   8   6  144.43    3.25
  -1   8  -6  140.70    2.46
   1  -8   6  134.18    2.78
   1   8   6  136.70    3.26
  -1   8  -6  133.15    2.96
  -1   8  -6  141.30    2.67
  -1  -8  -6  138.96    3.32
   1  -8   6  139.18    3.01
   1   8   6  138.68    3.47
   1   8   7  696.69    9.75
  -1   8  -7  671.13    8.71
   1   8   7  686.27    9.25
  -1   8  -7  691.50    7.71
   1   8   7  695.07    9.18
  -1   8  -7  698.69    8.68
  -1   8  -7  704.63    8.29
  -1  -8  -7  685.55    9.44
   1   8   8  427.06    7.16
   1   8   8  419.86    6.52
  -1   8  -8  427.48    6.00
  -1   8  -8  437.29    4.97
   1   8   8  416.64    6.48
  -1   8  -8  433.03    6.13
  -1   8  -8  428.44    5.63
  -1  -8  -8  418.28    6.80
   1   8   9  250.96    5.27
  -1   8  -9  255.60    4.10
   1   8   9  259.41    4.69
   1   8   9  263.15    4.69
  -1   8  -9  253.34    3.87
  -1  -8  -9  259.39    5.08
  -1   8  -9  256.19    4.37
  -1  -8 -10  116.06    3.31
   1   8  10  123.44    3.63
  -1   8 -10  115.92    2.78
   1   8  10  111.58    2.85
   1   8  11    8.85    1.46
  -1  -8 -11    9.14    1.28
   1   8  11    7.91    0.99
  -1  -8 -12  544.02    8.51
   1  -9 -11    4.35    1.24
   1  -9 -10    1.41    1.07
   1   9 -10    2.63    1.01
  -1   9  10    1.27    1.08
   1  -9  -9   47.76    2.29
   1   9  -9   46.26    1.68
   1   9  -9   48.06    2.03
  -1   9   9   45.65    2.25
  -1   9   8    1.72    0.93
   1  -9  -8    3.18    1.06
   1   9  -8    3.03    0.55
   1   9  -8    3.54    0.79
  -1   9   8    2.67    0.91
   1   9  -8    3.84    0.83
   1   9  -8    4.14    0.97
   1   9  -7  383.38    6.10
  -1   9   7  380.31    6.41
   1   9  -7  361.62    4.97
  -1   9   7  380.07    6.19
   1   9  -7  380.50    5.96
   1  -9  -7  375.21    6.23
   1  -9  -7  388.20    6.55
   1   9  -7  385.14    5.61
  -1   9   6    0.40    0.76
   1  -9  -6    0.32    0.79
   1   9  -6    1.61    0.53
   1   9  -6    1.11    0.62
  -1   9   6    0.90    0.81
   1   9  -6    1.30    0.75
   1  -9  -6    0.81    0.77
   1   9  -6    0.54    0.72
   1   9  -5   72.69    2.21
   1   9  -5   68.83    1.80
  -1  -9   5   68.04    2.23
  -1   9   5   73.64    2.36
   1   9  -5   71.37    2.30
  -1   9   5   68.69    2.36
   1  -9  -5   63.95    2.37
  -1   9   5   71.38    2.41
   1  -9  -5   65.82    2.38
   1   9  -5   68.96    2.03
   1   9  -4 1510.44   16.76
   1   9  -4 1485.39   16.08
  -1  -9   4 1510.49   16.96
  -1   9   4 1512.79   17.02
  -1   9   4 1481.73   17.32
   1   9  -4 1494.30   17.16
   1  -9  -4 1482.68   17.46
   1   9  -4 1477.62   16.54
  -1   9   4 1485.11   17.16
   1   9  -3  169.82    3.16
  -1  -9   3  173.31    3.59
   1   9  -3  167.26    3.40
  -1   9   3  167.24    3.46
   1  -9  -3  162.31    3.84
   1   9  -3  166.51    3.73
   1   9  -3  170.76    3.38
  -1   9   3  170.90    3.65
   1   9  -2  486.28    6.61
  -1  -9   2  489.47    7.00
  -1   9   2  485.84    6.76
  -1   9   2  478.80    7.32
   1   9  -2  501.99    7.36
   1  -9  -2  488.93    7.50
   1   9  -2  474.99    6.77
  -1   9   2  493.44    7.08
   1   9  -1   90.10    2.34
  -1  -9   1   89.16    2.47
  -1   9   1   89.50    2.68
  -1   9   1   85.82    2.25
   1   9  -1   86.23    2.62
   1  -9  -1   88.30    2.73
   1   9  -1   84.15    2.37
   1  -9  -1   85.98    2.41
  -1   9   1   90.00    2.45
   1   9   0  192.61    3.66
  -1   9   0  190.19    3.40
  -1   9   0  191.78    4.03
   1  -9   0  181.47    4.06
   1   9   0  193.50    4.07
   1   9   0  188.17    3.73
   1  -9   0  194.97    3.69
  -1   9   0  181.53    3.62
   1   9   1   22.91    1.33
   1  -9   1   23.66    1.25
   1   9   1   23.75    1.32
  -1   9  -1   22.89    1.43
   1   9   1   22.04    1.43
  -1   9  -1   22.54    1.27
   1   9   1   22.20    1.31
   1   9   2   97.32    2.60
   1  -9   2   96.12    2.38
  -1   9  -2   95.97    2.19
   1   9   2   91.17    2.56
  -1   9  -2   94.02    2.70
   1  -9   2   95.97    2.77
  -1  -9  -2   94.07    2.59
   1   9   2   94.08    2.63
  -1   9  -2   91.62    2.37
   1   9   3   15.71    1.18
   1  -9   3   15.73    1.02
  -1   9  -3   14.06    0.92
   1   9   3   14.58    1.19
  -1   9  -3   12.90    1.15
   1  -9   3   15.12    1.22
  -1   9  -3   14.51    0.99
  -1  -9  -3   15.73    1.19
   1   9   3   15.39    1.22
  -1   9  -4   16.29    1.00
   1   9   4   17.37    1.28
   1  -9   4   15.03    1.04
   1   9   4   17.40    1.28
  -1   9  -4   15.84    1.18
   1   9   4   15.68    1.29
   1  -9   4   18.80    1.27
   1   9   4   16.05    1.24
  -1   9  -4   16.91    1.07
  -1  -9  -4   14.81    1.21
  -1   9  -5  149.62    2.99
  -1   9  -5  141.83    2.79
   1  -9   5  148.78    3.11
   1   9   5  147.96    3.59
   1   9   5  155.70    3.64
  -1   9  -5  153.93    3.40
   1  -9   5  146.96    3.33
  -1  -9  -5  148.77    3.51
  -1   9  -5  146.41    2.93
  -1   9  -6   16.25    0.92
   1   9   6   14.27    1.22
   1  -9   6   16.69    1.11
   1   9   6   15.53    1.32
  -1   9  -6   16.10    1.20
  -1  -9  -6   17.29    1.36
  -1   9  -6   16.33    1.02
  -1   9  -6   17.31    1.08
   1   9   6   17.47    1.42
   1   9   7   43.40    2.11
  -1   9  -7   44.62    1.28
   1   9   7   43.85    1.91
  -1   9  -7   42.28    1.73
   1   9   7   45.67    2.01
  -1   9  -7   48.44    1.57
  -1  -9  -7   45.61    2.05
  -1   9  -7   44.75    1.66
   1   9   8   55.36    2.20
  -1   9  -8   53.84    1.87
  -1   9  -8   53.49    1.64
  -1  -9  -8   51.13    2.21
  -1   9  -8   53.27    1.84
   1   9   8   55.83    2.43
  -1  -9  -9   46.03    2.20
  -1   9  -9   46.12    1.73
   1   9   9   48.99    2.39
  -1  -9 -10    8.58    1.29
   1   9  10    8.33    1.41
  -1  -9 -11   12.05    1.50
   1 -10 -10   48.72    2.40
   1 -10  -9    3.39    1.22
  -1  10   9    2.62    1.13
   1  10  -9    1.49    0.91
   1  10  -8  336.06    5.67
   1  10  -8  336.79    5.30
   1 -10  -8  345.74    6.34
   1  10  -8  340.20    5.85
  -1  10   8  333.66    6.21
   1  10  -7   94.51    2.76
   1  10  -7   93.15    2.12
  -1  10   7   96.11    2.99
   1  10  -7   97.98    2.79
   1 -10  -7   96.95    2.95
   1 -10  -7   87.95    2.99
   1  10  -7   94.39    2.49
   1  10  -6   33.99    1.68
   1  10  -6   37.08    1.37
  -1 -10   6   35.73    1.73
  -1  10   6   31.43    1.78
   1  10  -6   34.31    1.72
   1 -10  -6   33.81    1.85
   1  10  -6   38.41    1.65
   1 -10  -6   34.00    1.89
   1  10  -5   14.57    1.16
   1  10  -5   15.26    0.99
  -1 -10   5   14.26    1.22
  -1  10   5   15.54    1.31
   1  10  -5   16.50    1.33
   1 -10  -5   12.99    1.32
   1 -10  -5   13.04    1.30
   1  10  -5   13.73    1.10
   1  10  -4   70.48    2.22
  -1  10   4   72.75    2.38
   1  10  -4   72.73    2.00
  -1 -10   4   74.21    2.44
   1  10  -4   72.15    2.48
   1 -10  -4   70.70    2.60
   1  10  -4   71.23    2.19
  -1  10   3    1.95    0.78
   1  10  -3    2.09    0.84
   1  10  -3    1.76    0.73
  -1 -10   3    1.60    0.85
   1  10  -3    2.62    0.92
   1 -10  -3    0.75    0.94
   1  10  -3    1.18    0.78
  -1  10   2  702.74    9.14
  -1 -10   2  696.75    9.44
   1  10  -2  688.08    8.91
   1  10  -2  710.35    9.81
  -1  10   2  700.01    9.84
   1 -10  -2  691.31    9.94
   1  10  -2  724.71    9.27
  -1  10   2  706.56    9.48
   1 -10  -2  708.45    9.43
  -1  10   1  851.74   10.50
   1  10  -1  871.61   10.62
  -1 -10   1  855.57   10.93
  -1  10   1  859.23   11.36
   1  10  -1  841.12   11.32
   1 -10  -1  847.41   11.48
  -1  10   1  859.74   10.91
   1 -10  -1  852.81   10.83
   1  10  -1  866.88   10.87
  -1  10   0    6.40    1.00
   1  10   0    6.22    0.98
  -1  10   0    5.01    0.82
   1  10   0    5.02    1.10
   1 -10   0    5.89    1.09
  -1  10   0    6.08    1.10
  -1 -10   0    5.96    1.01
   1 -10   0    7.44    0.99
   1 -10   1   20.29    1.29
   1  10   1   18.74    1.30
   1  10   1   18.48    1.47
  -1  10  -1   18.08    1.41
   1  10   1   23.55    1.46
  -1  10  -1   19.55    1.31
   1  10   1   17.83    1.26
  -1  10  -1   17.99    1.08
   1  10   2   15.45    1.24
   1 -10   2   15.63    1.13
  -1  10  -2   17.68    1.04
   1  10   2   15.90    1.26
  -1  10  -2   17.27    1.37
   1 -10   2   13.97    1.30
   1  10   2   17.46    1.35
  -1  10  -2   15.56    1.14
   1  10   3  159.45    3.68
   1  10   3  162.27    3.62
   1 -10   3  160.68    3.39
  -1  10  -3  158.43    3.11
  -1  10  -3  167.76    3.78
   1 -10   3  160.97    3.79
  -1 -10  -3  158.61    3.69
  -1  10  -3  160.55    3.32
  -1  10  -4   13.66    0.99
   1  10   4   11.34    1.22
  -1  10  -4   12.68    1.01
   1  10   4   11.56    1.15
  -1 -10  -4   11.97    1.22
   1 -10   4   11.27    1.04
  -1  10  -4   11.50    1.14
   1 -10   4   12.35    1.21
  -1  10  -4   12.84    1.00
  -1  10  -5   81.66    2.14
   1 -10   5   83.80    2.39
   1  10   5   84.64    2.77
  -1  10  -5   86.07    2.61
  -1  10  -5   89.64    2.30
  -1 -10  -5   80.20    2.65
  -1  10  -5   85.57    2.31
  -1  10  -6  327.02    4.72
   1 -10   6  325.13    5.26
  -1  10  -6  314.16    5.48
   1  10   6  325.09    6.04
  -1  10  -6  330.71    5.14
  -1 -10  -6  323.34    5.84
  -1  10  -6  326.08    5.03
  -1  10  -7  557.57    6.86
   1  10   7  565.82    8.78
  -1  10  -7  559.39    7.56
  -1 -10  -7  558.87    8.49
  -1  10  -7  564.49    7.38
  -1  10  -7  566.80    7.99
  -1  10  -8  208.54    4.06
  -1 -10  -8  199.68    4.54
   1  10   8  210.80    4.87
  -1 -10  -9   37.67    2.09
   1  10   9   44.60    2.34
  -1 -10 -10    0.72    1.14
  -1  11   9    5.92    1.24
   1 -11  -9    8.49    1.47
  -1  11   8   33.18    1.99
   1 -11  -8   29.74    1.99
   1 -11  -7    8.24    1.36
   1  11  -7    5.82    1.02
  -1  11   7    6.52    1.22
  -1  11   6  185.15    4.30
   1  11  -6  194.95    3.49
  -1 -11   6  190.20    4.17
   1 -11  -6  187.27    4.43
   1  11  -6  190.27    4.06
   1  11  -5   48.47    1.69
  -1  11   5   50.22    2.15
  -1 -11   5   47.70    2.07
   1 -11  -5   47.04    2.22
   1  11  -5   51.56    2.00
   1  11  -4    1.63    0.74
  -1 -11   4    3.51    0.96
   1  11  -4    1.99    0.83
   1 -11  -4    1.24    1.01
  -1  11   4    0.98    0.90
   1  11  -3  750.90    9.38
  -1 -11   3  752.22   10.10
   1  11  -3  743.39    9.69
  -1  11   3  740.41    9.86
   1 -11  -3  735.10   10.57
   1 -11  -3  708.08   10.04
   1  11  -2   16.15    1.19
  -1 -11   2   15.65    1.35
   1  11  -2   17.70    1.22
  -1  11   2   18.44    1.32
   1 -11  -2   16.39    1.50
   1 -11  -2   18.84    1.44
   1 -11  -1   92.85    2.74
  -1 -11   1   94.74    2.84
  -1  11   1   96.23    2.56
   1 -11  -1   99.45    3.16
   1  11  -1   95.97    2.63
   1  11   0   24.21    1.43
  -1 -11   0   22.40    1.48
   1 -11   0   22.15    1.41
   1  11   0   23.40    1.46
   1 -11   1   39.87    1.78
  -1  11  -1   43.74    1.65
   1  11   1   38.37    1.82
   1  11   1   42.11    1.86
  -1  11  -1   41.02    1.82
  -1  11  -2  245.04    4.13
   1  11   2  238.43    4.74
   1 -11   2  235.52    4.50
  -1  11  -2  244.29    4.16
   1 -11   2  244.35    5.04
  -1  11  -2  241.18    4.51
  -1  11  -3    1.32    0.79
  -1  11  -3    1.24    0.83
  -1 -11  -3    1.59    0.93
   1 -11   3    1.66    0.79
  -1  11  -3    2.00    0.66
   1 -11   3    1.09    0.87
   1  11   3    0.47    0.83
   1  11   4   15.39    1.40
  -1  11  -4   18.34    1.17
   1 -11   4   16.03    1.21
  -1  11  -4   16.47    1.11
  -1 -11  -4   15.04    1.39
  -1  11  -4   16.29    1.19
   1  11   5  298.39    5.80
  -1  11  -5  308.91    4.85
   1 -11   5  298.32    5.22
  -1  11  -5  307.82    4.96
  -1  11  -5  309.72    5.09
  -1 -11  -5  311.16    5.76
   1 -11   6  106.92    2.82
  -1  11  -6  109.24    2.46
  -1 -11  -6  105.50    3.26
  -1  11  -6  109.06    2.71
   1  11   6  103.08    3.30
  -1 -11  -7  214.90    4.81
   1  11   7  213.26    4.94
  -1 -11  -8   35.12    2.06
   1  11   8   35.38    2.15
  -1 -11  -9    2.32    1.16
   1 -12  -7  119.22    3.65
  -1  12   7  122.82    3.60
  -1  12   6   12.70    1.41
   1  12  -6   13.51    1.27
  -1 -12   6   14.65    1.41
   1 -12  -6   12.65    1.46
  -1 -12   5   38.16    1.96
   1  12  -5   39.95    1.61
  -1  12   5   36.77    1.92
   1  12  -5   39.51    1.83
  -1 -12   4  171.57    4.09
   1  12  -4  177.30    3.56
   1  12  -4  180.94    3.90
  -1  12   4  167.64    3.97
  -1  12   3  249.51    4.85
   1  12  -3  249.75    4.75
  -1 -12   3  254.10    5.11
   1 -12  -3  242.43    5.38
   1 -12  -3  261.31    5.16
   1 -12  -2    1.53    0.97
  -1 -12   2    1.33    0.96
  -1  12   2    1.75    0.87
   1 -12  -2    2.47    1.09
   1  12  -2    1.60    0.84
   1 -12  -1   14.79    1.52
  -1  12   1   16.95    1.27
   1 -12  -1   14.37    1.34
  -1 -12   1   14.15    1.38
   1  12   0   59.40    2.20
  -1 -12   0   59.94    2.39
   1 -12   0   60.27    2.27
  -1  12  -1   14.52    1.16
   1  12   1   14.30    1.30
   1 -12   1   14.42    1.27
  -1 -12  -1   15.40    1.41
   1  12   2   20.25    1.54
  -1  12  -2   19.70    1.22
  -1  12  -2   17.46    1.17
   1 -12   2   21.48    1.44
  -1  12  -3   52.79    1.86
   1 -12   3   52.51    2.11
   1  12   3   54.15    2.30
  -1  12  -3   56.22    2.09
  -1 -12  -4   22.54    1.69
   1 -12   4   23.64    1.49
  -1  12  -4   23.91    1.40
   1  12   4   24.96    1.68
  -1  12  -5   10.00    1.02
  -1 -12  -5   10.21    1.36
   1 -12   5   12.43    1.24
   1  12   5   10.47    1.40
   1 -12   6   81.78    2.57
   1  12   6   81.19    3.00
  -1 -12  -6   81.52    2.95
  -1 -12  -7  144.00    3.98
  -1 -13   6   23.99    1.75
  -1  13   6   25.99    1.84
  -1 -13   5  137.76    3.78
  -1  13   5  137.91    3.72
   1 -13  -4    5.33    1.32
  -1 -13   4    5.57    1.19
  -1  13   4    4.36    1.11
  -1 -13   3   90.38    3.03
   1 -13  -3   97.14    3.14
  -1  13   3   93.06    2.91
   1 -13  -2    7.24    1.24
  -1 -13   2    5.69    1.24
  -1  13   2    7.77    1.15
  -1 -13   1  151.25    3.95
   1 -13  -1  149.81    3.82
  -1  13   1  152.91    3.56
   1  13  -1  148.04    3.60
  -1 -13   0   17.95    1.59
   1 -13   0   20.30    1.55
   1  13   0   14.86    1.42
  -1  13   0   18.47    1.35
  -1 -13  -1   76.89    2.79
   1 -13   1   73.90    2.65
  -1  13  -1   72.78    2.33
   1  13   1   74.99    2.63
   1 -13   2    8.87    1.21
  -1 -13  -2    8.47    1.34
  -1  13  -2    6.62    0.97
   1  13   2    7.66    1.28
   1 -13   3   40.32    2.04
   1  13   3   38.40    2.09
   1 -13   4    5.47    1.16
   1  13   4    5.07    1.20
  -1 -13  -5    1.26    1.16
   1 -13   5    2.82    1.03
   1  13   5    2.28    1.14
  -1 -14   2   52.42    2.46
  -1  14   2   53.83    2.27
   1  14  -2   53.13    2.22
   1 -14  -1   54.36    2.46
  -1 -14   1   57.24    2.56
  -1  14   1   56.85    2.22
   1  14  -1   54.38    2.32
  -1 -14   0   43.64    2.29
   1 -14   0   43.25    2.15
   1  14   0   40.25    2.09
  -1 -14  -1   33.30    2.10
   1  14   1   31.79    1.90
   2   0 -15   -0.59    1.03
   2   0 -14  129.90    3.41
  -2   0  14  134.77    4.08
   2   0 -13    1.02    0.85
  -2   0  13    1.03    0.24
  -2   0  13    0.47    0.25
  -2   0  13    1.12    1.07
   2   0 -12   55.25    2.09
  -2   0  12   54.78    1.15
  -2   0  11    0.12    0.35
   2   0 -11    1.14    0.71
   2   0 -11    0.60    0.77
   2   0 -10  220.78    4.25
  -2   0  10  218.46    3.02
   2   0 -10  214.14    4.04
   2   0  -9    0.21    0.19
   2   0  -9    0.48    0.53
   2   0  -9    0.18    0.57
   2   0  -8  407.03    5.97
   2   0  -8  419.70    5.88
   2   0  -8  410.25    4.58
   2   0  -7    0.59    0.25
   2   0  -7    0.32    0.50
  -2   0   7    0.71    0.57
  -2   0   6 1513.04   16.76
   2   0  -6 1558.68   16.52
   2   0  -6 1537.30   15.36
   2   0  -5    1.06    0.24
   2   0  -5    0.38    0.41
  -2   0   5    0.76    0.22
  -2   0   5   -0.05    0.42
   2   0  -3    0.27    0.22
  -2   0   3    0.18    0.31
  -2   0   2 2381.42   23.48
   2   0  -2 2359.91   23.48
  -2   0   1    0.17    0.16
   2   0  -1    1.84    0.24
  -2   0   1    0.29    0.17
   2   0  -1    0.26    0.17
  -2   0  -1    0.32    0.18
  -2   0  -1    0.73    0.18
   2   0   1    0.24    0.17
   2   0   1    0.18    0.16
  -2   0  -3    0.77    0.22
  -2   0  -3    0.64    0.19
   2   0   3    0.45    0.20
   2   0   3    0.29    0.13
  -2   0  -4  224.73    2.70
   2   0   4  223.71    2.79
   2   0   4  223.38    2.75
  -2   0  -4  223.39    3.09
   2   0   4  216.70    2.63
  -2   0  -4  219.17    2.61
   2   0   5    0.17    0.17
  -2   0  -5    0.69    0.21
   2   0   5    0.35    0.21
  -2   0  -5    0.44    0.21
  -2   0  -5    0.69    0.34
   2   0   6  304.22    3.40
  -2   0  -6  300.24    4.29
   2   0   6  295.81    4.30
   2   0   6  300.53    3.61
  -2   0  -6  302.03    3.74
   2   0   7   -0.15    0.25
   2   0   7    0.65    0.17
   2   0   7    0.47    0.16
  -2   0  -7    0.82    0.32
   2   0   7    0.45    0.45
  -2   0  -7    0.03    0.43
   2   0   8  350.37    4.03
  -2   0  -8  334.36    5.06
   2   0   8  336.51    5.15
  -2   0  -8  334.00    4.41
  -2   0  -9    0.16    0.61
   2   0   9    0.35    0.68
  -2   0  -9    0.26    0.43
   2   0   9    0.29    0.28
  -2   0 -10   14.84    1.16
   2   0  10   14.65    0.53
  -2   0 -10   12.33    0.83
   2   0  10   13.85    1.21
  -2   0 -11   -0.36    0.73
  -2   0 -11    0.31    0.52
   2   0  11    0.63    0.80
  -2   0 -12   63.22    2.28
   2   0  12   65.54    2.51
  -2   0 -12   64.76    1.81
   2   0  13    0.55    0.99
  -2   0 -13    1.86    0.62
   2   0  14  133.27    3.85
   2   1 -15   19.66    1.50
   2  -1 -15   18.88    1.52
  -2  -1  14  157.55    4.36
  -2   1  14  156.54    4.45
  -2   1  14  153.88    2.29
  -2   1  14  158.39    2.16
   2   1 -14  158.47    3.74
   2  -1 -14  159.73    3.87
   2   1 -13    1.06    0.80
   2  -1 -13    0.92    0.89
  -2  -1  13    0.73    1.05
  -2   1  13    0.76    0.43
  -2   1  13    0.50    0.40
   2  -1 -12    9.62    1.14
   2   1 -12   12.40    1.13
  -2  -1  12    9.45    1.28
   2   1 -12   10.17    1.19
  -2  -1  11   10.30    1.26
  -2  -1  11   10.42    0.39
   2   1 -11   11.07    1.04
   2  -1 -11    9.96    1.06
   2   1 -11    8.71    1.09
   2  -1 -11   10.88    1.14
   2  -1 -10   19.88    1.32
   2   1 -10   19.37    1.28
  -2  -1  10   20.53    0.62
   2   1 -10   19.07    1.18
   2  -1 -10   19.78    1.24
   2  -1 -10   18.67    0.50
  -2   1  10   17.29    1.41
   2  -1  -9  514.35    7.19
   2   1  -9  505.81    7.11
  -2  -1   9  506.42    5.53
   2   1  -9  496.09    5.09
   2  -1  -9  510.98    7.01
   2  -1  -9  505.15    5.50
   2   1  -9  489.90    5.06
  -2   1   9  508.92    7.50
   2  -1  -8   54.61    1.82
  -2   1   8   56.15    1.12
  -2  -1   8   52.96    1.11
   2   1  -8   53.41    0.96
   2  -1  -8   53.74    1.15
   2  -1  -8   53.01    1.75
  -2   1   8   57.36    2.01
   2   1  -8   52.71    1.80
   2  -1  -7 1798.89   19.06
  -2   1   7 1760.92   17.73
  -2  -1   7 1783.33   17.71
   2   1  -7 1749.08   17.54
   2  -1  -7 1803.39   17.84
   2  -1  -7 1715.11   18.93
  -2   1   7 1807.84   19.39
   2   1  -7 1799.72   19.07
   2  -1  -6 1140.63   12.62
  -2   1   6 1127.66   11.65
   2   1  -6 1150.43   11.54
  -2  -1   6 1110.73   11.59
   2  -1  -6 1137.05   11.72
   2  -1  -6 1135.20   12.57
  -2  -1   6 1123.46   12.90
  -2   1   6 1127.89   12.90
   2   1  -6 1137.93   12.69
   2  -1  -5   21.10    0.93
  -2  -1   5   25.52    0.73
   2  -1  -5   22.80    0.72
   2   1  -5   26.69    0.73
  -2   1   5   22.54    0.71
   2  -1  -5   23.08    0.97
  -2  -1   5   22.32    1.03
  -2   1   5   27.07    1.13
   2   1  -5   22.64    1.01
  -2  -1   4  141.06    2.03
   2  -1  -4  137.84    2.07
   2   1  -4  141.08    2.04
  -2   1   4  142.20    2.08
   2  -1  -4  141.32    2.43
  -2  -1   4  136.67    2.51
  -2   1   4  141.78    2.50
   2   1  -4  140.11    2.50
   2  -1  -4  135.56    2.38
  -2  -1   3 5040.86   49.18
   2  -1  -2  478.76    5.29
  -2   1   2  468.23    5.34
  -2  -1   2  469.21    5.47
   2   1  -2  467.69    5.50
   2   1  -2  467.81    5.22
   2  -1   0   22.84    0.67
  -2  -1   0   22.06    0.64
   2   1   0   23.51    0.67
  -2   1   0   22.89    0.66
   2   1   0   24.54    0.63
  -2  -1   0   23.39    0.63
  -2   1   0   23.14    0.44
  -2   1  -2   32.79    0.79
  -2  -1  -2   32.73    0.71
  -2   1  -2   33.38    0.63
  -2  -1  -2   32.75    0.78
  -2   1  -2   35.30    0.78
   2   1   4  875.86    9.43
  -2   1  -4  926.45    9.16
  -2  -1  -4  912.24    9.48
  -2   1  -4  902.91    9.28
   2  -1   4  888.73    9.26
   2   1   4  916.12    9.45
  -2   1  -4  905.14    8.89
  -2  -1  -4  905.52    9.39
   2  -1   4  888.35    9.56
  -2   1  -4  900.75    9.56
  -2  -1  -4  919.86    9.87
   2  -1   5   69.59    1.53
   2   1   5   66.48    1.30
  -2   1  -5   68.29    1.05
  -2   1  -5   66.17    1.49
  -2  -1  -5   66.46    1.60
   2  -1   5   66.75    1.14
   2   1   5   67.98    1.35
  -2   1  -5   68.70    1.08
  -2  -1  -5   69.03    1.36
   2  -1   6  514.76    6.36
   2   1   6  519.50    5.82
   2   1   6  519.85    5.63
   2   1   6  500.66    6.51
  -2  -1  -6  508.10    6.50
  -2   1  -6  501.23    6.30
   2  -1   6  516.53    5.42
   2   1   6  503.69    5.93
  -2   1  -6  509.71    5.58
  -2  -1  -6  511.08    5.98
   2  -1   7   24.94    1.11
   2   1   7   25.41    0.81
   2   1   7   24.68    0.66
  -2   1  -7   26.30    1.08
   2   1   7   25.41    1.17
  -2  -1  -7   25.76    1.17
   2  -1   7   24.99    0.52
   2   1   7   25.29    0.67
  -2   1  -7   26.74    0.79
  -2  -1  -7   25.24    0.93
   2  -1   8   37.15    1.45
   2   1   8   36.26    0.73
   2   1   8   36.23    1.48
  -2  -1  -8   39.05    1.51
  -2   1  -8   36.23    1.38
   2   1   8   35.14    0.97
   2   1   8   37.09    0.75
  -2   1  -8   38.08    1.04
  -2  -1  -8   38.50    1.21
   2   1   9  908.24    9.75
   2  -1   9  919.48   11.16
   2   1   9  918.91   11.25
  -2   1  -9  915.33    9.98
  -2  -1  -9  923.21   10.37
  -2   1  -9  906.38   10.93
  -2  -1  -9  913.63   11.14
   2   1  10 1162.68   12.24
   2   1  10 1193.98   14.13
   2  -1  10 1190.24   14.05
  -2  -1 -10 1157.58   13.00
  -2   1 -10 1181.75   12.64
  -2  -1 -10 1178.67   13.96
  -2   1 -10 1191.05   13.72
   2   1  11  545.13    6.33
   2   1  11  571.82    8.37
   2  -1  11  567.31    8.26
  -2  -1 -11  574.08    7.29
  -2   1 -11  578.24    6.94
  -2  -1 -11  579.99    8.16
  -2   1 -11  577.00    7.95
   2   1  12   67.16    1.32
  -2   1 -12   71.58    2.35
  -2  -1 -12   71.09    2.47
  -2   1 -12   68.87    1.77
  -2  -1 -12   72.21    1.99
   2  -1  12   70.94    2.52
   2   1  12   73.53    2.65
  -2  -1 -13  147.24    3.00
   2  -1  13  149.15    3.86
   2   1  13  149.99    3.94
   2  -1  14   35.52    2.07
   2   1  14   33.81    2.08
   2   2 -15   27.61    1.68
   2  -2 -15   26.59    1.78
  -2  -2  14   80.14    3.14
   2   2 -14   76.94    2.54
   2  -2 -14   79.62    2.75
  -2   2  14   77.00    1.64
   2  -2 -13  131.85    3.52
   2   2 -13  140.76    3.35
  -2  -2  13  138.60    3.99
   2  -2 -12  106.78    3.05
   2   2 -12  111.98    3.11
  -2  -2  12  111.30    3.39
   2   2 -12  112.96    2.91
   2  -2 -11   11.03    1.16
   2   2 -11   12.10    1.15
   2   2 -11   14.93    1.13
   2  -2 -11   11.70    1.16
  -2   2  11   10.40    1.29
  -2  -2  11   11.80    1.25
   2  -2 -10    6.23    0.92
  -2   2  10    5.42    0.43
   2  -2 -10    5.05    0.92
   2   2 -10    5.70    0.87
   2  -2 -10    6.11    0.45
  -2   2  10    5.65    1.02
  -2  -2  10    5.47    1.01
  -2  -2   9  164.53    1.93
  -2   2   9  153.05    2.34
   2  -2  -9  155.01    3.43
   2   2  -9  159.97    1.96
   2  -2  -9  154.29    2.41
   2   2  -9  159.13    1.99
   2  -2  -9  154.44    3.37
   2   2  -9  159.72    3.38
  -2   2   9  157.46    3.62
  -2  -2   8  467.61    5.08
  -2   2   8  477.22    5.55
   2   2  -8  471.87    5.23
   2  -2  -8  478.52    6.77
   2  -2  -8  479.83    5.67
   2   2  -8  485.10    5.21
   2  -2  -8  482.81    6.73
  -2   2   8  465.09    6.93
   2   2  -8  488.69    6.77
  -2  -2   7    1.69    0.26
   2   2  -7    2.61    0.31
  -2   2   7    0.63    0.58
   2   2  -7    0.67    0.55
   2  -2  -7    1.88    0.59
  -2   2   7    1.10    0.32
   2  -2  -7    1.60    0.37
   2  -2  -7    1.25    0.52
   2  -2  -6  737.90    8.84
   2   2  -6  718.85    7.86
  -2   2   6  742.50    8.04
   2  -2  -6  730.91    8.17
  -2  -2   6  743.91    7.68
   2  -2  -6  735.00    8.87
  -2   2   6  728.40    8.96
   2   2  -6  714.57    8.92
   2  -2  -5  162.58    2.88
  -2  -2   5  169.03    2.24
   2  -2  -5  164.21    2.57
  -2   2   5  168.15    2.47
   2  -2  -5  168.99    2.94
  -2   2   5  168.08    2.97
  -2  -2   5  157.26    2.98
   2   2  -5  161.80    2.98
  -2  -2   4  889.82    9.11
   2   2  -4  881.40    9.17
  -2   2   4  877.21    9.39
   2  -2  -4  894.16    9.53
   2  -2  -4  850.86    9.84
  -2   2   4  890.97    9.83
   2   2  -4  868.45    9.93
  -2  -2   4  853.14    9.96
   2   2  -3  170.44    2.38
   2  -2  -3  171.57    2.60
  -2  -2   3  177.21    2.79
   2   2  -3  176.00    2.66
   2  -2  -3  179.80    2.75
   2   2  -3  172.89    2.79
  -2   2   3  176.69    2.65
   2   2  -2    4.33    0.33
   2  -2  -2    3.89    0.37
  -2  -2   2    4.83    0.41
   2  -2  -2    4.00    0.38
  -2   2   2    4.24    0.38
  -2   2   2    4.14    0.33
   2   2  -2    4.68    0.41
   2   2  -1  615.11    6.74
  -2  -2   1  619.83    6.70
  -2   2   1  627.35    6.87
   2  -2  -1  621.39    6.95
   2   2  -1  630.69    6.84
  -2  -2   1  624.70    6.90
  -2   2   1  618.53    6.75
  -2   2   1  623.48    6.49
   2   2   0  217.96    2.86
  -2  -2   0  222.90    2.83
  -2   2   0  216.65    2.92
   2  -2   0  221.59    2.98
  -2  -2   0  223.96    2.90
   2   2   0  222.63    2.82
  -2   2   0  214.47    2.66
  -2   2   0  216.21    2.35
  -2  -2  -1  370.12    4.31
  -2   2  -1  379.65    4.40
  -2   2  -1  372.81    3.95
   2   2   1  363.38    4.35
  -2  -2  -1  366.49    4.35
  -2   2  -3 1238.42   12.34
  -2   2  -3 1243.74   12.47
  -2  -2  -3 1205.75   12.85
  -2   2  -3 1238.95   12.64
   2  -2   3 1271.49   12.72
   2  -2   3 1247.13   12.41
  -2  -2  -3 1217.74   12.71
  -2   2  -4 1181.62   12.09
  -2  -2  -4 1172.57   12.67
  -2   2  -4 1190.91   11.85
   2   2   4 1191.36   12.28
  -2   2  -4 1184.50   12.05
   2  -2   4 1190.86   12.14
   2   2   4 1163.84   12.36
  -2  -2  -4 1167.51   12.30
   2  -2   4 1181.53   12.17
   2  -2   5  962.62   10.30
  -2   2  -5  945.93   10.16
  -2  -2  -5  910.07   10.69
   2   2   5  925.21   10.10
  -2   2  -5  957.24    9.50
  -2   2  -5  955.95    9.81
  -2   2  -5  952.73    9.42
   2  -2   5  952.40    9.88
  -2   2  -5  953.43    9.43
   2   2   5  960.23   10.30
  -2  -2  -5  938.38   10.25
   2  -2   6  114.55    2.25
  -2  -2  -6  115.97    2.45
  -2   2  -6  112.31    2.15
  -2   2  -6  113.69    1.39
   2   2   6  116.35    1.99
  -2   2  -6  113.25    1.68
  -2   2  -6  111.30    1.59
   2  -2   6  113.81    1.74
  -2   2  -6  116.22    1.62
   2   2   6  114.15    2.13
   2   2   6  118.19    1.91
  -2  -2  -6  118.07    2.16
   2  -2   7   14.68    0.91
  -2   2  -7   17.05    0.88
  -2  -2  -7   15.58    0.98
   2   2   7   15.88    0.71
   2   2   7   15.68    0.65
   2   2   7   15.02    0.80
   2  -2   7   15.30    0.49
  -2   2  -7   15.61    0.58
  -2  -2  -7   14.43    0.79
   2  -2   8  282.70    4.50
   2   2   8  269.70    3.73
  -2   2  -8  276.94    4.29
  -2  -2  -8  279.97    4.64
   2   2   8  285.55    4.72
   2   2   8  284.62    4.14
  -2   2  -8  281.02    3.55
   2   2   8  280.76    3.52
  -2  -2  -8  274.55    4.14
   2   2   9  381.14    4.74
   2   2   9  367.08    4.25
  -2   2  -9  377.30    5.46
  -2  -2  -9  374.56    5.82
   2   2   9  378.65    5.93
   2   2   9  371.37    4.27
   2  -2   9  374.06    5.69
  -2   2  -9  366.97    4.59
  -2  -2  -9  367.94    5.23
   2   2  10    0.48    0.44
   2   2  10    0.48    0.18
   2   2  10    0.65    0.18
   2  -2  10    1.01    0.80
  -2   2 -10    0.62    0.41
  -2  -2 -10    0.03    0.59
   2   2  10    0.43    0.76
  -2  -2 -10    1.40    0.78
  -2   2 -10    0.81    0.71
   2   2  11   47.65    1.30
   2   2  11   47.90    2.10
   2  -2  11   48.58    2.00
  -2   2 -11   49.45    1.35
  -2  -2 -11   46.23    1.66
  -2   2 -11   48.73    1.87
  -2  -2 -11   47.37    2.01
   2   2  12   69.29    1.59
   2   2  12   69.66    2.62
   2  -2  12   71.92    2.56
  -2   2 -12   72.79    1.73
  -2  -2 -12   70.70    2.09
  -2   2 -12   71.34    2.34
   2   2  13  192.33    4.64
   2  -2  13  188.85    4.44
  -2  -2 -13  201.15    3.77
   2   2  13  191.98    2.88
   2  -2  14    9.39    1.38
   2   2  14    8.01    1.40
  -2  -3  14   89.17    3.29
  -2   3  14   90.75    2.03
   2   3 -14   88.72    2.69
   2  -3 -14   86.48    2.94
   2  -3 -13  148.48    3.80
   2   3 -13  145.95    3.33
   2   3 -13  154.48    3.51
  -2  -3  13  153.99    4.14
  -2   3  13  150.71    4.24
   2  -3 -12    7.64    1.08
  -2   3  12    6.94    0.44
   2   3 -12    6.41    0.96
  -2   3  12    6.19    1.28
  -2  -3  12    6.94    1.21
  -2   3  11    6.02    0.51
   2   3 -11    6.85    1.07
   2  -3 -11    5.63    1.04
   2  -3 -11    5.26    1.01
  -2  -3  11    6.13    1.06
  -2   3  11    6.23    1.16
   2  -3 -10   32.00    1.62
  -2   3  10   32.78    1.01
   2  -3 -10   32.71    1.67
   2   3 -10   30.13    0.61
   2   3 -10   31.73    0.65
   2  -3 -10   32.79    1.04
  -2   3  10   34.69    1.83
   2   3 -10   31.87    1.58
  -2  -3  10   32.83    1.75
   2  -3  -9  125.43    3.12
   2   3  -9  132.47    1.93
  -2   3   9  130.47    2.25
   2   3  -9  130.81    3.07
  -2   3   9  126.69    3.25
  -2  -3   9  135.73    3.31
   2   3  -9  132.73    1.96
   2  -3  -9  131.17    2.36
   2  -3  -9  135.64    3.20
   2  -3  -8  600.51    8.09
  -2  -3   8  599.21    6.21
  -2   3   8  620.74    7.00
   2   3  -8  595.37    6.65
   2  -3  -8  598.96    7.14
   2  -3  -8  587.24    8.09
   2   3  -8  599.02    6.66
  -2   3   8  606.27    8.26
  -2  -3   8  596.41    8.25
   2   3  -8  604.81    8.06
  -2  -3   7  178.89    2.26
  -2   3   7  177.61    2.77
   2  -3  -7  172.70    3.46
   2   3  -7  184.69    2.61
   2  -3  -7  179.17    2.95
  -2   3   7  183.84    3.55
   2   3  -7  177.53    3.46
   2  -3  -6    0.50    0.51
  -2  -3   6    0.99    0.25
  -2   3   6    0.91    0.35
   2  -3  -6    1.12    0.39
   2   3  -6    1.05    0.52
  -2  -3   5   28.52    0.74
   2   3  -5   27.78    0.80
  -2   3   5   28.83    0.96
   2  -3  -5   29.69    1.06
  -2   3   5   28.78    1.15
   2  -3  -5   29.36    1.22
  -2   3   5   29.39    1.16
   2   3  -5   29.01    1.20
  -2  -3   4 1107.27   11.37
   2   3  -4 1122.99   11.52
   2   3  -4 1116.71   12.02
  -2   3   4 1113.41   12.12
  -2   3   4 1119.62   11.86
   2  -3  -4 1095.03   12.08
   2  -3  -4 1114.89   12.32
  -2   3   4 1099.80   12.15
   2   3  -4 1126.47   12.32
   2   3  -3 1323.48   13.30
  -2  -3   3 1278.51   13.19
  -2  -3   3 1284.37   13.81
   2   3  -3 1300.85   13.65
  -2   3   3 1299.13   13.57
   2  -3  -3 1304.68   13.80
  -2   3   3 1295.88   13.75
   2  -3  -3 1296.64   13.85
   2   3  -3 1297.08   13.87
   2   3  -2  117.13    1.91
   2   3  -2  118.73    2.16
   2   3  -2  122.81    2.09
  -2  -3   2  123.39    2.17
  -2   3   2  121.46    1.93
   2  -3  -2  123.10    2.22
  -2   3   2  120.81    2.08
   2  -3  -2  120.61    2.15
   2   3  -1 1419.91   14.64
  -2  -3   1 1417.47   14.79
  -2   3   1 1439.05   14.25
   2  -3  -1 1413.50   14.24
   2  -3  -1 1432.34   14.96
  -2   3   1 1437.23   14.83
  -2   3   1 1428.68   14.61
   2   3  -1 1434.72   14.53
  -2  -3   0  610.77    6.84
   2   3   0  616.52    6.74
  -2   3   0  606.96    6.89
   2  -3   0  621.05    7.05
  -2   3   0  604.51    6.59
  -2  -3   0  604.37    6.78
   2   3   0  619.63    6.74
  -2   3  -1   34.86    1.00
  -2  -3  -1   36.11    0.97
  -2  -3  -1   34.60    1.00
   2   3   1   35.43    0.96
  -2   3  -1   34.21    0.79
   2   3   1   35.28    0.97
   2  -3   1   35.43    0.80
  -2  -3  -2  142.43    2.37
   2   3   2  142.55    2.26
  -2   3  -2  144.34    2.27
  -2   3  -2  139.75    1.84
  -2  -3  -2  141.36    2.26
   2  -3   2  141.96    1.81
  -2   3  -2  142.50    1.66
   2  -3   3  221.02    2.50
   2  -3   3  215.46    3.15
  -2   3  -3  213.78    3.00
  -2  -3  -3  217.64    3.14
  -2   3  -3  216.24    2.49
  -2   3  -3  215.96    2.57
   2  -3   3  217.06    2.61
   2   3   3  215.24    3.34
   2  -3   4   23.64    0.73
   2   3   4   21.59    0.82
   2   3   4   22.10    0.99
  -2   3  -4   22.37    0.67
   2  -3   4   21.85    0.81
  -2   3  -4   23.12    0.77
   2   3   4   23.59    0.85
   2   3   4   22.50    0.89
  -2  -3  -4   24.01    0.90
   2  -3   5  112.88    2.02
  -2   3  -5  112.84    1.92
   2   3   5  116.78    2.09
  -2   3  -5  118.14    1.63
  -2   3  -5  112.18    1.47
   2  -3   5  116.86    2.00
  -2   3  -5  107.63    1.83
   2   3   5  111.24    2.05
  -2  -3  -5  114.74    2.18
   2   3   5  114.11    2.20
   2  -3   6  115.96    2.24
  -2   3  -6  113.08    1.45
   2   3   6  120.42    2.15
  -2   3  -6  119.17    1.86
  -2   3  -6  115.24    2.11
  -2  -3  -6  121.57    2.58
  -2   3  -6  116.58    1.60
   2   3   6  115.62    2.12
   2   3   6  117.45    2.33
   2  -3   6  118.53    1.95
  -2  -3  -6  119.57    2.32
   2  -3   7  116.17    2.43
   2   3   7  116.84    2.16
  -2   3  -7  117.27    1.80
  -2   3  -7  111.10    2.25
  -2  -3  -7  121.04    2.71
  -2   3  -7  120.40    1.72
   2   3   7  118.03    2.14
   2  -3   7  116.03    1.85
  -2   3  -7  115.43    1.74
   2   3   7  117.52    2.41
  -2  -3  -7  114.93    2.39
   2  -3   8  116.22    2.61
  -2   3  -8  119.14    2.46
  -2  -3  -8  117.41    2.82
   2   3   8  116.39    2.21
  -2   3  -8  115.28    1.65
  -2   3  -8  119.46    1.82
   2   3   8  117.65    2.11
  -2   3  -8  116.65    1.85
   2  -3   8  114.23    1.65
   2   3   8  116.08    2.47
  -2  -3  -8  116.81    2.50
   2  -3   9  246.33    4.28
   2   3   9  233.29    3.54
  -2   3  -9  238.86    3.15
  -2   3  -9  243.00    4.03
   2   3   9  229.60    4.50
  -2  -3  -9  235.80    4.42
   2   3   9  238.91    3.33
   2   3   9  243.44    3.98
  -2   3  -9  240.99    3.23
  -2  -3  -9  241.66    4.02
   2  -3  10    8.89    0.98
   2   3  10    9.39    1.12
  -2   3 -10    8.48    0.90
  -2  -3 -10    8.69    1.02
   2   3  10    7.14    0.67
  -2   3 -10    8.74    0.57
   2   3  10    8.70    0.54
  -2   3 -10    8.92    0.60
  -2  -3 -10    9.60    0.91
  -2  -3 -11   27.55    1.65
  -2   3 -11   28.53    1.43
   2   3  11   27.27    1.09
   2   3  11   28.77    0.71
   2   3  11   27.27    0.68
  -2   3 -11   29.32    0.97
   2  -3  11   31.39    1.63
   2   3  11   27.79    1.73
  -2   3 -11   30.71    1.03
  -2  -3 -11   32.85    1.48
   2   3  12   78.99    1.85
  -2   3 -12   74.84    2.38
  -2   3 -12   74.79    1.69
  -2  -3 -12   76.47    2.27
   2   3  12   79.19    2.82
   2  -3  12   77.57    2.61
  -2   3 -13    3.53    0.91
   2   3  13    3.98    1.17
  -2  -3 -13    3.53    0.87
   2  -3  13    3.60    1.05
   2   3  13    3.02    0.61
   2  -3  14   80.10    2.86
  -2  -3 -14   81.88    2.41
  -2  -4  14   22.81    1.82
  -2   4  14   21.87    1.14
   2   4 -14   19.61    1.43
   2  -4 -14   20.23    1.69
   2  -4 -13    3.82    1.09
   2   4 -13    4.96    0.89
  -2   4  13    4.86    0.45
   2   4 -13    4.08    0.92
  -2  -4  13    4.11    1.16
  -2   4  13    2.93    1.21
   2   4 -12   19.01    1.22
  -2   4  12   20.03    0.83
   2  -4 -12   20.21    1.51
  -2  -4  12   18.81    1.55
  -2   4  12   18.74    1.66
   2  -4 -11   38.40    1.88
  -2   4  11   37.48    1.19
   2   4 -11   36.92    1.55
   2  -4 -11   36.05    1.18
   2   4 -11   35.91    1.77
  -2   4  11   37.59    2.04
  -2  -4  11   40.78    1.97
   2  -4 -10  141.57    3.48
   2  -4 -10  143.19    3.52
  -2   4  10  145.97    2.56
   2   4 -10  144.07    2.11
   2   4 -10  139.92    3.02
   2   4 -10  147.48    2.15
   2  -4 -10  142.20    2.62
  -2  -4  10  143.53    3.57
  -2   4  10  145.79    3.67
   2   4 -10  146.62    3.42
   2  -4  -9   47.57    1.94
   2   4  -9   48.52    1.19
  -2   4   9   49.13    1.39
   2   4  -9   49.38    1.67
   2  -4  -9   51.93    1.52
   2   4  -9   49.80    1.22
  -2   4   9   48.36    2.00
  -2  -4   9   50.96    2.01
   2   4  -9   50.70    1.91
   2  -4  -8  482.01    7.07
   2   4  -8  475.25    6.45
  -2   4   8  484.44    6.05
   2   4  -8  479.45    5.80
   2  -4  -8  492.25    6.31
  -2  -4   8  469.90    7.01
   2   4  -8  486.68    6.98
  -2   4   8  490.65    7.12
   2  -4  -7  212.97    4.04
   2   4  -7  213.80    2.82
  -2  -4   7  217.21    3.99
   2   4  -7  224.43    3.67
  -2   4   7  218.32    3.38
   2   4  -7  220.01    3.21
   2  -4  -7  218.03    3.57
  -2   4   7  214.35    3.97
   2   4  -7  207.80    3.94
   2   4  -6  857.89   10.39
   2   4  -6  855.89    9.14
  -2  -4   6  861.88    9.09
   2   4  -6  873.47    9.98
  -2   4   6  873.17   10.36
  -2   4   6  873.50    9.74
   2   4  -6  872.02    9.53
   2  -4  -6  865.26   10.01
  -2   4   6  844.84   10.23
   2  -4  -6  876.86   10.49
   2   4  -5 1352.66   14.81
  -2  -4   5 1346.12   13.72
   2   4  -5 1334.10   13.76
   2   4  -5 1332.83   14.40
  -2   4   5 1322.42   14.62
   2  -4  -5 1312.32   14.55
  -2   4   5 1342.88   14.32
   2   4  -5 1333.87   14.10
  -2   4   5 1367.84   14.74
   2  -4  -5 1352.10   14.89
   2   4  -4   94.77    2.16
  -2   4   4   93.37    2.02
   2   4  -4   93.25    1.99
  -2  -4   4   94.41    1.70
   2   4  -4   91.01    1.69
  -2   4   4   95.11    2.00
   2  -4  -4   95.52    2.13
   2   4  -4   97.09    1.89
  -2   4   4   97.17    2.13
   2  -4  -4   90.69    2.16
   2  -4  -3 2183.27   21.95
  -2   4   3 2162.31   21.94
   2   4  -3 2146.55   22.29
   2   4  -3 2157.95   22.00
  -2  -4   3 2198.96   21.69
   2   4  -3 2148.23   21.60
   2  -4  -3 2157.67   22.38
  -2   4   3 2163.23   22.19
   2  -4  -3 2122.56   22.34
   2   4  -2  992.73   10.70
   2   4  -2 1006.61   11.15
  -2  -4   2 1016.22   11.15
   2   4  -2 1022.10   10.93
   2  -4  -2 1021.74   11.37
  -2   4   2  990.40   11.13
  -2   4   2 1024.28   11.07
  -2   4   2 1024.66   10.75
   2  -4  -2 1012.15   10.73
  -2   4   1    1.84    0.38
   2   4  -1    2.35    0.34
  -2   4   1    3.36    0.46
  -2   4   1    2.04    0.29
   2  -4  -1    1.62    0.43
  -2  -4   1    4.44    0.47
   2   4  -1    4.63    0.46
  -2  -4   0 2335.78   23.46
  -2   4   0 2321.94   23.60
   2  -4   0 2309.86   23.82
   2   4   0 2322.20   23.29
   2   4   0 2326.03   23.36
  -2   4   0 2327.48   23.21
  -2   4   0 2320.43   22.72
  -2   4  -1 4474.53   43.66
   2   4   1 4446.35   43.46
   2   4   1 4430.30   43.68
   2   4   1 4450.09   43.55
  -2   4  -1 4412.73   43.16
   2   4   2   69.73    1.58
  -2   4  -2   65.86    1.59
  -2   4  -2   70.77    1.31
  -2  -4  -2   70.26    1.62
  -2   4  -2   70.34    1.12
  -2   4  -3 4353.62   41.77
  -2  -4  -3 4319.22   42.59
   2   4   3 4294.08   42.88
  -2   4  -3 4329.22   42.45
   2  -4   3 4312.89   42.66
   2   4   3 4260.95   42.62
  -2   4  -3 4335.31   41.71
  -2   4  -4 1178.80   11.84
   2   4   4 1148.07   12.85
  -2  -4  -4 1186.72   12.80
   2  -4   4 1184.89   12.06
   2  -4   4 1175.93   11.91
  -2   4  -4 1186.28   12.51
  -2   4  -4 1169.81   12.04
   2   4   4 1156.60   12.77
   2  -4   4 1177.40   12.72
   2   4   4 1201.45   13.19
   2  -4   5   57.33    1.31
  -2   4  -5   56.51    1.26
   2   4   5   57.07    1.49
   2   4   5   56.52    1.77
  -2   4  -5   51.84    1.30
   2   4   5   55.11    1.52
   2  -4   5   54.92    1.43
   2   4   5   55.60    1.59
  -2   4  -5   56.23    1.02
  -2  -4  -5   57.80    1.58
   2  -4   6  383.63    4.92
  -2   4  -6  376.41    4.76
   2   4   6  375.13    5.68
   2   4   6  380.68    5.02
  -2   4  -6  357.95    4.13
  -2   4  -6  376.47    4.64
   2   4   6  378.46    5.07
   2  -4   6  377.45    4.83
  -2   4  -6  379.80    4.19
   2   4   6  377.92    5.28
  -2  -4  -6  369.58    5.23
   2  -4   7 2777.09   28.44
  -2   4  -7 2788.76   28.21
  -2  -4  -7 2806.03   29.19
   2   4   7 2833.16   28.34
  -2   4  -7 2816.65   27.33
  -2   4  -7 2813.15   27.74
   2  -4   7 2799.95   27.88
   2   4   7 2822.64   28.76
   2   4   7 2799.27   28.34
  -2  -4  -7 2758.41   28.72
   2  -4   8 2021.87   21.41
  -2   4  -8 2032.02   21.12
  -2  -4  -8 2028.36   22.05
   2   4   8 2005.43   21.01
  -2   4  -8 2055.90   20.28
  -2   4  -8 2024.50   20.08
   2  -4   8 2029.97   20.31
   2   4   8 2051.40   21.54
   2   4   8 2000.30   20.95
  -2  -4  -8 2068.63   21.60
   2  -4   9 2287.51   24.35
  -2   4  -9 2295.67   24.01
  -2  -4  -9 2292.83   24.90
   2   4   9 2311.65   23.67
  -2   4  -9 2325.74   22.62
  -2   4  -9 2320.44   22.80
   2   4   9 2299.01   23.51
  -2   4  -9 2283.12   22.93
   2   4   9 2308.58   24.27
  -2  -4  -9 2293.54   24.32
   2  -4  10  154.60    3.36
   2   4  10  151.88    2.81
  -2   4 -10  150.51    2.27
   2   4  10  147.36    3.66
  -2   4 -10  151.67    3.13
  -2  -4 -10  155.64    3.62
   2   4  10  154.61    2.61
   2   4  10  153.03    3.22
  -2   4 -10  151.55    2.37
  -2  -4 -10  153.26    3.28
   2  -4  11  459.23    6.99
   2   4  11  456.15    7.53
  -2   4 -11  460.80    6.64
   2   4  11  474.43    6.10
  -2   4 -11  458.94    5.38
   2   4  11  469.97    5.54
  -2   4 -11  460.71    5.54
  -2  -4 -11  458.78    6.73
  -2   4 -12  100.46    2.71
   2   4  12  100.41    1.63
   2   4  12  102.55    2.26
   2   4  12  100.78    1.59
  -2  -4 -12  103.53    2.76
   2  -4  12   99.82    2.91
   2   4  12  101.20    3.25
   2   4  13    4.16    0.67
  -2  -4 -13    4.24    0.94
   2  -4  13    3.20    1.01
  -2   4 -13    2.78    0.91
   2   4  13    2.76    1.24
  -2  -4 -14   12.47    1.20
   2  -4  14   12.91    1.39
  -2   5  14   52.11    1.83
   2   5 -14   53.94    2.12
   2  -5 -14   56.39    2.51
  -2  -5  14   52.99    2.51
  -2  -5  13   18.26    1.60
  -2   5  13   16.18    1.66
   2  -5 -13   14.57    1.47
  -2   5  12   14.44    0.85
   2   5 -12   14.46    1.12
   2  -5 -12   14.20    1.39
  -2  -5  12   13.86    1.41
  -2   5  12   16.65    1.62
   2  -5 -11   53.21    2.25
   2   5 -11   50.13    1.11
   2   5 -11   50.06    1.81
  -2  -5  11   50.70    2.21
  -2   5  11   56.97    1.59
   2  -5 -11   49.31    1.52
  -2   5  11   47.19    2.29
   2   5 -11   50.46    2.07
   2  -5 -10   98.52    2.95
   2   5 -10   96.01    1.85
  -2   5  10   98.92    2.18
   2   5 -10   98.68    1.90
  -2  -5  10   94.85    2.89
   2   5 -10  102.22    2.51
   2  -5 -10   99.35    2.30
   2   5 -10   99.51    2.81
  -2   5  10   99.82    3.06
   2  -5  -9   22.34    1.45
  -2   5   9   21.37    1.05
  -2  -5   9   20.43    1.36
   2   5  -9   22.86    1.20
   2   5  -9   20.54    0.91
   2  -5  -9   20.28    1.10
   2   5  -9   23.10    1.43
   2  -5  -8   50.84    1.99
  -2  -5   8   48.63    1.86
   2   5  -8   50.14    1.66
  -2   5   8   48.35    1.52
   2   5  -8   51.03    1.44
   2  -5  -8   51.32    1.68
  -2   5   8   52.91    2.00
   2   5  -8   53.23    1.97
   2   5  -7   25.87    1.38
   2   5  -7   26.03    0.84
   2   5  -7   25.34    1.15
  -2  -5   7   24.25    1.29
  -2   5   7   27.96    1.40
  -2   5   7   26.92    1.15
   2  -5  -7   24.62    1.20
   2   5  -7   26.14    1.05
   2  -5  -7   25.56    1.44
   2   5  -6   35.31    1.50
   2   5  -6   38.32    1.05
   2   5  -6   39.77    1.37
  -2  -5   6   38.04    1.50
   2  -5  -6   37.24    1.48
  -2   5   6   37.55    1.49
  -2   5   6   36.94    1.35
  -2   5   6   35.61    1.46
   2  -5  -6   35.53    1.41
   2  -5  -6   37.38    1.59
   2   5  -5  286.75    4.62
   2   5  -5  280.86    3.81
   2   5  -5  294.41    4.31
  -2   5   5  290.18    4.50
   2  -5  -5  295.68    4.51
  -2   5   5  290.97    4.39
  -2   5   5  291.69    4.57
   2  -5  -5  296.92    4.61
   2   5  -5  297.12    4.26
   2  -5  -5  291.39    4.74
   2   5  -4   76.35    2.05
  -2   5   4   83.47    1.98
   2  -5  -4   79.22    1.94
   2   5  -4   88.04    1.94
   2   5  -4   82.83    1.67
   2   5  -4   80.64    1.89
   2  -5  -4   80.58    2.13
  -2   5   4   81.85    2.05
   2  -5  -4   84.18    2.15
  -2   5   3   82.99    1.85
   2  -5  -3   84.55    1.84
   2   5  -3   86.74    2.03
   2   5  -3   85.37    1.87
   2   5  -3   83.12    1.67
   2  -5  -3   84.65    2.15
  -2   5   3   83.61    1.99
   2   5  -3   83.66    1.92
   2  -5  -3   82.77    2.05
   2   5  -2  977.56   10.53
   2   5  -2  965.76   10.96
   2   5  -2  983.04   10.77
  -2   5   2  959.19   11.10
   2  -5  -2  979.95   11.34
  -2   5   2  988.84   10.97
   2   5  -2  974.97   10.99
  -2   5   2  972.64   10.59
  -2   5   1    2.16    0.44
   2   5  -1    3.10    0.43
  -2   5   1    1.90    0.48
  -2   5   1    1.33    0.31
   2  -5  -1    1.87    0.52
   2   5  -1    1.04    0.42
   2   5  -1    1.52    0.41
  -2  -5   1    2.27    0.46
   2   5   0 1860.18   19.28
  -2  -5   0 1881.05   19.49
  -2   5   0 1879.36   18.73
  -2   5   0 1860.27   19.69
   2  -5   0 1882.57   19.92
   2   5   0 1865.55   19.64
   2   5   0 1864.07   19.36
  -2   5   0 1890.22   19.26
   2  -5   0 1900.14   19.23
   2   5   1 2651.59   26.55
  -2  -5  -1 2618.79   26.64
  -2   5  -1 2636.28   25.70
   2   5   1 2578.11   26.83
  -2   5  -1 2599.57   26.25
   2   5   1 2583.52   26.58
   2  -5   1 2639.08   26.18
  -2   5  -2  155.91    2.14
  -2   5  -2  155.32    2.82
   2   5   2  158.21    2.74
  -2  -5  -2  153.99    2.78
  -2   5  -2  155.28    2.41
   2   5   2  153.84    2.79
   2  -5   2  153.47    2.35
  -2  -5  -3 3682.62   37.15
  -2   5  -3 3739.72   36.30
   2  -5   3 3720.21   36.28
   2   5   3 3681.52   37.40
  -2   5  -3 3701.69   37.00
   2  -5   3 3754.17   37.27
   2   5   3 3639.10   37.23
  -2   5  -3 3740.94   36.14
  -2   5  -4 2679.52   26.24
  -2  -5  -4 2729.62   27.27
   2  -5   4 2643.22   26.31
  -2   5  -4 2668.09   26.95
  -2   5  -4 2638.59   26.33
   2   5   4 2700.83   27.35
   2  -5   4 2628.11   27.23
   2   5   4 2649.05   27.61
  -2   5  -5   51.30    1.27
   2   5   5   54.91    1.59
   2   5   5   57.48    1.87
  -2   5  -5   52.37    1.44
   2  -5   5   55.45    1.57
   2   5   5   53.38    1.63
  -2   5  -5   54.88    1.15
  -2  -5  -5   57.20    1.71
  -2   5  -6  358.83    4.70
   2   5   6  364.73    5.14
   2  -5   6  374.40    4.80
   2   5   6  362.91    5.76
  -2   5  -6  365.64    4.81
   2   5   6  371.83    5.28
   2  -5   6  374.12    5.04
  -2   5  -6  368.88    4.31
  -2  -5  -6  369.92    5.40
   2   5   6  371.25    5.42
  -2   5  -7  301.82    3.32
   2   5   7  283.90    4.36
   2  -5   7  287.85    4.21
  -2   5  -7  286.52    3.95
  -2  -5  -7  283.42    4.61
  -2   5  -7  286.82    3.55
   2  -5   7  287.66    4.11
   2   5   7  288.28    4.44
   2   5   7  283.39    4.65
   2   5   7  272.72    4.99
  -2   5  -7  289.41    4.10
   2  -5   8  223.11    3.71
  -2   5  -8  217.90    3.54
   2   5   8  215.75    3.64
  -2   5  -8  215.69    3.17
   2   5   8  220.02    4.00
   2  -5   8  219.01    3.24
   2   5   8  220.96    3.70
  -2  -5  -8  221.47    4.01
  -2   5  -8  221.10    2.89
   2  -5   9  316.88    4.91
  -2  -5  -9  308.94    5.42
  -2   5  -9  310.31    4.67
   2   5   9  311.76    4.66
  -2   5  -9  309.06    3.95
  -2   5  -9  310.43    3.80
   2   5   9  304.05    4.59
   2   5   9  309.38    5.05
  -2  -5  -9  304.38    5.06
   2  -5  10  411.92    6.17
  -2  -5 -10  412.89    6.68
  -2   5 -10  413.17    5.90
   2   5  10  411.16    5.70
  -2   5 -10  411.05    4.67
  -2   5 -10  413.64    4.83
   2   5  10  415.73    5.58
   2   5  10  412.38    6.27
  -2   5 -10  410.62    4.97
  -2  -5 -10  407.45    6.30
   2  -5  11   64.47    2.18
   2   5  11   63.53    1.84
  -2  -5 -11   63.13    2.20
   2   5  11   60.89    1.62
  -2   5 -11   60.77    1.39
   2   5  11   65.85    2.19
  -2   5 -11   63.76    2.03
  -2  -5 -12    0.16    0.82
   2   5  12    0.80    0.47
   2   5  12    0.52    1.00
  -2   5 -12    0.04    0.77
   2  -5  12   -0.17    0.79
   2   5  12   -0.33    0.67
  -2  -5 -13    1.30    0.89
   2   5  13    0.95    0.69
   2   5  13    1.85    1.19
   2  -5  13    3.18    0.93
   2  -6 -13   55.63    2.55
  -2  -6  13   54.19    2.45
  -2  -6  12   35.02    1.96
   2   6 -12   37.41    1.61
  -2   6  12   36.33    1.36
   2  -6 -12   38.43    2.06
  -2   6  12   39.02    2.24
  -2   6  11    6.72    1.25
   2   6 -11    7.09    1.08
   2  -6 -11    5.48    1.20
   2   6 -11    5.82    0.59
  -2   6  11    6.01    0.74
  -2  -6  11    6.64    1.13
   2  -6 -11    5.65    0.78
   2   6 -11    7.25    0.90
  -2  -6  10   58.08    2.25
   2   6 -10   56.32    1.85
   2  -6 -10   59.41    2.36
   2   6 -10   58.15    1.56
  -2   6  10   55.51    1.73
   2  -6 -10   59.38    1.87
   2   6 -10   53.69    2.16
  -2   6  10   58.80    2.42
   2  -6  -9  156.37    3.63
   2  -6  -9  146.24    3.68
   2   6  -9  155.67    3.13
  -2  -6   9  152.49    3.53
  -2   6   9  148.39    2.98
   2  -6  -9  152.89    3.20
   2   6  -9  150.63    2.81
  -2   6   9  153.39    3.70
   2   6  -9  156.38    3.58
  -2   6   8    4.09    0.85
   2  -6  -8    3.21    0.84
   2  -6  -8    3.77    0.92
   2   6  -8    3.23    0.43
   2   6  -8    3.86    0.70
  -2   6   8    4.02    0.70
   2   6  -8    2.81    0.59
   2  -6  -8    3.24    0.72
  -2  -6   8    3.70    0.77
   2   6  -8    2.67    0.76
  -2   6   7    4.73    0.84
   2  -6  -7    5.20    0.84
   2  -6  -7    4.36    0.84
   2   6  -7    5.21    0.52
   2   6  -7    8.27    0.80
  -2   6   7    6.67    0.79
   2   6  -7    5.31    0.69
   2  -6  -7    3.71    0.73
   2   6  -7    6.32    0.90
   2   6  -6  372.06    5.83
   2   6  -6  383.98    4.91
   2   6  -6  398.24    5.48
  -2   6   6  388.70    5.86
   2  -6  -6  395.32    5.81
  -2   6   6  383.69    5.62
   2   6  -6  397.73    5.51
   2  -6  -6  386.85    5.87
  -2   6   6  382.76    5.87
   2  -6  -6  393.89    6.11
   2   6  -5  936.74   11.33
   2   6  -5  941.33   10.36
   2   6  -5  953.43   10.86
  -2   6   5  961.40   11.23
   2  -6  -5  955.16   11.15
  -2   6   5  952.21   11.20
  -2   6   5  955.53   11.35
   2  -6  -5  946.34   11.47
   2   6  -5  958.93   11.04
   2  -6  -5  948.51   11.58
   2   6  -4  212.31    3.76
   2  -6  -4  213.47    3.56
  -2   6   4  208.34    3.59
   2   6  -4  213.10    3.49
  -2  -6   4  215.66    3.79
   2   6  -4  210.11    3.17
  -2   6   4  214.77    3.78
   2  -6  -4  212.32    3.93
   2   6  -4  221.09    3.70
  -2   6   4  213.44    3.80
   2  -6  -4  211.27    3.89
   2   6  -3   29.51    1.25
   2   6  -3   30.65    1.17
   2   6  -3   30.36    1.06
   2   6  -3   29.29    1.25
  -2   6   3   30.40    1.28
   2  -6  -3   32.94    1.44
  -2   6   3   31.84    1.18
  -2   6   2  273.10    3.94
   2   6  -2  272.34    3.88
  -2   6   2  266.54    4.36
   2   6  -2  270.27    4.31
   2  -6  -2  269.78    4.59
   2   6  -2  266.87    4.04
  -2   6   2  271.46    4.21
  -2   6   1  651.75    7.66
  -2  -6   1  658.76    8.23
   2   6  -1  681.02    7.92
  -2   6   1  685.21    8.45
   2  -6  -1  672.73    8.69
   2   6  -1  687.84    8.43
  -2   6   1  673.57    8.10
   2   6  -1  677.79    8.07
  -2   6   0  117.00    2.01
  -2  -6   0  117.06    2.47
   2   6   0  114.63    2.32
  -2   6   0  118.01    2.59
   2  -6   0  115.10    2.69
   2   6   0  118.50    2.59
  -2   6   0  119.71    2.35
   2  -6   0  114.86    2.30
   2   6   0  118.02    2.42
  -2   6  -1  351.99    4.23
   2   6   1  351.10    4.88
  -2  -6  -1  339.80    4.95
  -2   6  -1  344.14    5.09
   2   6   1  340.13    5.17
   2   6   1  355.57    4.98
  -2   6  -1  340.50    4.67
   2  -6   1  350.66    4.61
   2   6   2    1.22    0.53
   2  -6   2    1.79    0.40
  -2  -6  -2    1.14    0.48
  -2   6  -2    0.91    0.51
   2   6   2    1.51    0.52
  -2   6  -2    2.51    0.47
  -2   6  -2    1.40    0.31
  -2   6  -3  659.36    7.31
   2   6   3  658.40    8.11
   2  -6   3  666.58    7.50
   2   6   3  659.96    8.43
  -2   6  -3  665.41    8.20
   2  -6   3  653.78    8.37
   2   6   3  640.09    8.33
  -2   6  -3  659.33    7.52
  -2  -6  -3  664.66    8.21
  -2  -6  -4  233.09    3.91
  -2   6  -4  229.09    3.24
   2  -6   4  225.17    3.26
   2   6   4  225.73    4.08
  -2   6  -4  220.90    3.69
   2  -6   4  225.95    3.90
   2   6   4  229.45    4.00
  -2   6  -4  226.38    3.20
  -2   6  -5  174.71    2.73
   2   6   5  171.73    3.21
   2  -6   5  167.80    2.67
  -2   6  -5  167.97    3.05
  -2   6  -5  172.67    2.60
   2   6   5  175.72    3.41
  -2  -6  -5  172.77    3.36
   2   6   5  174.37    3.36
   2  -6   5  174.69    3.26
   2   6   5  173.73    3.58
  -2   6  -6   77.73    1.73
   2   6   6   74.10    2.02
   2   6   6   77.30    2.39
  -2   6  -6   77.74    1.88
   2   6   6   76.67    2.16
   2  -6   6   82.47    2.05
  -2   6  -6   78.19    1.54
   2   6   6   81.55    2.25
  -2  -6  -6   77.90    2.19
  -2   6  -7  387.16    5.12
   2   6   7  384.19    5.56
   2  -6   7  386.50    5.16
   2   6   7  389.77    6.30
  -2   6  -7  383.71    5.18
   2   6   7  379.84    5.68
   2  -6   7  389.61    5.37
  -2  -6  -7  388.36    5.89
  -2   6  -7  389.67    4.70
   2   6   7  395.92    5.95
   2   6   8  462.09    6.30
  -2   6  -8  448.52    4.60
   2  -6   8  478.61    6.08
   2   6   8  468.44    7.25
  -2   6  -8  475.76    5.98
  -2   6  -8  488.92    5.81
   2  -6   8  471.27    5.89
   2   6   8  472.53    6.43
   2   6   8  478.79    6.78
  -2  -6  -8  475.27    6.75
  -2   6  -8  473.64    5.32
   2   6   9 1216.18   13.90
   2  -6   9 1236.00   13.86
  -2   6  -9 1241.84   13.69
   2   6   9 1236.90   15.20
  -2   6  -9 1250.82   13.15
   2   6   9 1236.19   13.98
   2   6   9 1224.90   14.49
  -2  -6  -9 1206.90   14.49
  -2   6  -9 1229.97   12.75
   2   6  10  126.45    2.78
   2  -6  10  122.06    2.84
  -2   6 -10  127.35    2.77
   2   6  10  128.86    2.77
   2   6  10  127.03    3.14
  -2  -6 -10  127.20    3.17
   2  -6  11   30.27    1.50
  -2   6 -11   28.42    1.40
   2   6  11   29.10    1.27
   2   6  11   29.22    1.35
  -2  -6 -11   29.65    1.67
   2   6  12   84.02    2.02
   2  -6  12   90.73    2.60
  -2  -6 -12   85.48    2.69
   2   6  12   88.78    2.33
   2  -6  13   19.11    1.37
  -2  -6 -13   18.40    1.47
   2   6  13   18.19    1.18
   2  -7 -13    0.48    1.08
  -2  -7  13   -0.78    1.09
  -2   7  12  158.90    3.14
  -2  -7  12  160.48    4.04
   2  -7 -12  154.64    4.17
  -2   7  12  153.28    4.32
  -2   7  11   58.46    1.88
  -2  -7  11   55.50    2.31
   2   7 -11   62.45    1.98
   2  -7 -11   57.68    2.52
  -2   7  11   63.86    2.65
   2  -7 -10  384.55    6.80
   2   7 -10  379.76    5.69
  -2  -7  10  382.75    6.37
   2   7 -10  384.92    5.36
  -2   7  10  382.34    5.69
   2  -7 -10  383.62    5.87
  -2   7  10  360.75    6.60
   2   7 -10  389.24    6.44
   2  -7  -9   11.30    1.19
  -2   7   9   11.12    1.28
   2  -7  -9    9.70    1.25
   2   7  -9   10.53    0.58
   2   7  -9   10.62    0.98
  -2   7   9   10.57    0.99
   2   7  -9   11.46    0.93
   2  -7  -9    9.56    1.02
   2   7  -9   10.82    1.17
   2   7  -8   64.95    2.24
   2   7  -8   62.36    1.46
   2   7  -8   65.28    1.93
   2  -7  -8   64.70    2.23
  -2   7   8   63.75    2.28
  -2   7   8   60.04    1.97
   2  -7  -8   62.01    2.14
   2   7  -8   63.49    1.88
   2  -7  -8   59.57    2.31
   2   7  -7  179.60    3.79
   2   7  -7  173.40    2.84
   2   7  -7  174.20    3.32
  -2   7   7  179.20    3.80
   2  -7  -7  176.32    3.69
  -2   7   7  175.46    3.52
   2  -7  -7  180.12    3.73
   2   7  -7  192.54    3.51
  -2   7   7  177.23    3.79
   2  -7  -7  175.98    3.94
   2   7  -6   92.14    2.55
   2   7  -6   94.71    1.96
   2   7  -6   92.24    2.25
  -2   7   6   93.12    2.55
   2  -7  -6   91.08    2.43
  -2   7   6   95.19    2.49
  -2   7   6   93.35    2.57
   2  -7  -6   96.55    2.65
   2   7  -6   93.03    2.37
   2  -7  -6   98.38    2.75
   2   7  -5  206.70    3.91
  -2   7   5  203.11    3.80
   2  -7  -5  203.40    3.71
   2   7  -5  203.12    3.22
   2   7  -5  218.28    3.64
  -2  -7   5  200.50    3.86
  -2   7   5  210.39    3.93
   2   7  -5  205.88    3.79
  -2   7   5  208.13    3.95
   2  -7  -5  203.18    4.06
   2  -7  -5  211.53    4.10
  -2   7   4    1.32    0.58
  -2   7   4    2.07    0.67
   2   7  -4    2.30    0.51
  -2  -7   4    1.79    0.62
   2   7  -4    1.99    0.54
  -2   7   4    1.76    0.63
   2   7  -4    1.43    0.63
   2  -7  -4    1.53    0.70
   2   7  -4    1.92    0.62
  -2   7   3   58.08    1.71
  -2  -7   3   53.48    1.81
   2   7  -3   56.05    1.78
   2   7  -3   53.92    1.51
   2   7  -3   54.93    1.83
   2  -7  -3   56.20    2.02
  -2   7   3   60.80    1.88
   2   7  -3   54.05    1.65
  -2   7   2  212.54    3.49
  -2   7   2  221.63    4.01
   2   7  -2  219.64    3.50
   2   7  -2  218.70    3.96
   2  -7  -2  217.24    4.17
  -2   7   2  214.87    3.79
   2   7  -2  214.39    3.65
  -2   7   1  589.68    7.10
   2   7  -1  595.40    7.33
  -2   7   1  597.95    7.90
   2  -7  -1  589.92    8.17
   2   7  -1  597.63    7.91
   2   7  -1  568.78    7.45
   2  -7  -1  597.56    7.54
  -2   7   1  592.26    7.53
  -2   7   0  395.03    5.03
  -2  -7   0  389.41    5.65
   2   7   0  399.44    5.47
  -2   7   0  401.09    5.88
   2  -7   0  393.85    6.09
   2   7   0  397.76    5.93
   2  -7   0  390.75    5.40
  -2   7   0  394.21    5.48
   2   7   0  386.99    5.57
  -2   7  -1  272.56    3.71
   2   7   1  277.77    4.31
  -2  -7  -1  275.72    4.43
  -2   7  -1  282.16    4.60
   2   7   1  272.18    4.67
  -2   7  -1  280.22    4.18
   2  -7   1  273.52    4.08
   2   7   1  273.52    4.40
  -2   7  -2    8.22    0.83
  -2   7  -2    7.43    0.54
  -2  -7  -2    7.19    0.79
   2  -7   2    8.01    0.67
   2   7   2    7.33    0.77
   2   7   2    8.17    0.84
  -2   7  -2    7.86    0.66
  -2   7  -3  237.57    3.37
   2   7   3  233.92    4.00
   2  -7   3  235.00    3.55
  -2   7  -3  237.13    3.62
  -2  -7  -3  242.28    4.13
  -2   7  -3  238.90    4.09
   2  -7   3  232.98    4.29
   2   7   3  230.16    4.25
   2   7   3  246.01    4.31
   2   7   4   84.83    2.41
   2  -7   4   82.93    1.85
  -2  -7  -4   78.15    2.22
  -2   7  -4   83.08    1.82
  -2   7  -4   87.95    2.24
   2   7   4   80.67    2.35
   2  -7   4   83.86    2.32
  -2   7  -4   82.70    1.74
   2   7   5  146.89    3.39
  -2   7  -5  148.95    2.53
   2   7   5  144.41    3.21
  -2  -7  -5  147.37    3.18
   2  -7   5  145.60    2.60
  -2   7  -5  145.83    2.94
   2   7   5  154.56    3.29
   2  -7   5  145.22    3.10
  -2   7  -5  142.61    2.52
   2   7   6    4.55    0.86
  -2   7  -6    5.78    0.55
   2   7   6    4.39    0.79
   2   7   6    5.03    0.76
  -2  -7  -6    5.11    0.82
  -2   7  -6    5.49    0.71
   2   7   6    4.83    0.80
   2  -7   6    6.38    0.79
  -2   7  -6    4.77    0.60
  -2   7  -7  937.54   10.63
   2   7   7  931.71   12.17
  -2   7  -7  945.79   10.05
   2   7   7  947.93   11.32
  -2   7  -7  957.78   10.92
   2  -7   7  944.91   11.11
   2   7   7  947.04   11.56
  -2   7  -7  945.67   10.26
   2   7   7  947.32   11.73
  -2  -7  -7  944.67   11.70
  -2   7  -8   19.75    1.00
   2   7   8   19.73    1.52
  -2   7  -8   20.34    1.02
   2   7   8   18.63    1.23
   2   7   8   21.86    1.26
  -2   7  -8   18.81    0.60
   2   7   8   19.63    1.36
   2  -7   8   19.02    1.05
  -2   7  -8   20.22    0.86
   2   7   9   23.92    1.34
   2   7   9   23.35    1.34
  -2   7  -9   24.01    1.07
   2   7   9   20.77    1.62
  -2   7  -9   24.59    1.18
  -2   7  -9   23.19    0.90
  -2  -7  -9   23.45    1.53
   2   7  10  662.73    8.62
   2  -7  10  668.83    8.47
   2   7  10  652.19    8.61
   2   7  10  668.14    9.86
  -2   7 -10  657.57    8.31
  -2  -7 -10  660.64    9.29
   2   7  11    2.12    0.84
   2   7  11    1.37    0.75
   2  -7  11    1.28    0.75
  -2  -7 -11    0.60    0.99
  -2  -7 -12   76.65    2.69
   2  -7  12   77.09    2.34
   2  -8 -12   61.48    2.73
  -2   8  11  302.16    4.99
   2  -8 -11  292.55    6.02
  -2   8  11  303.17    6.10
   2  -8 -10  198.24    4.63
   2   8 -10  185.31    3.63
  -2   8  10  191.24    3.80
   2  -8 -10  189.17    3.93
  -2   8  10  192.37    4.54
   2   8 -10  196.66    4.31
   2   8  -9  212.95    4.44
  -2   8   9  212.93    4.63
   2   8  -9  211.91    3.09
   2   8  -9  211.98    3.87
  -2   8   9  206.83    4.03
   2   8  -9  210.12    3.89
   2  -8  -9  216.94    4.29
   2  -8  -9  217.11    4.77
   2  -8  -8    4.74    0.96
  -2   8   8    2.28    0.89
   2  -8  -8    2.78    1.01
   2   8  -8    2.27    0.54
   2   8  -8    3.83    0.77
  -2   8   8    2.26    0.80
   2   8  -8    2.68    0.76
   2  -8  -8    2.52    0.84
   2   8  -8    3.49    0.90
   2   8  -7   44.72    1.89
  -2   8   7   47.05    1.95
   2  -8  -7   43.01    1.79
   2   8  -7   45.75    1.39
   2   8  -7   45.90    1.64
  -2   8   7   41.98    1.78
   2  -8  -7   44.47    1.95
   2   8  -7   43.94    1.69
   2  -8  -7   46.44    2.07
  -2   8   6    6.08    0.94
   2  -8  -6    6.18    1.04
  -2   8   6    5.97    0.96
   2   8  -6    6.06    0.66
   2   8  -6    7.16    0.87
  -2   8   6    7.24    0.97
   2  -8  -6   10.03    1.12
   2   8  -6    6.53    0.92
   2   8  -6    6.02    0.92
   2   8  -5  256.70    4.60
   2   8  -5  259.08    3.90
  -2  -8   5  260.10    4.64
  -2   8   5  253.24    4.52
  -2   8   5  253.63    4.66
   2   8  -5  249.37    4.53
   2  -8  -5  262.96    4.93
  -2   8   5  262.90    4.74
   2   8  -5  254.95    4.26
   2  -8  -5  261.62    4.84
   2   8  -4  646.65    7.86
  -2  -8   4  656.25    8.72
   2   8  -4  658.19    8.61
  -2   8   4  642.97    8.42
  -2   8   4  648.55    8.79
   2   8  -4  657.95    8.72
   2  -8  -4  656.28    9.09
  -2   8   4  651.33    8.74
   2   8  -4  639.50    8.22
   2   8  -3    8.60    0.89
   2   8  -3    9.19    0.80
   2   8  -3    8.23    0.85
  -2  -8   3    8.26    0.92
  -2   8   3    8.15    0.80
   2   8  -3   10.91    1.03
   2  -8  -3   10.33    1.07
  -2   8   3    8.71    0.94
   2   8  -2  523.77    6.73
  -2   8   2  507.74    7.39
  -2   8   2  519.50    6.76
   2   8  -2  526.14    7.43
   2  -8  -2  518.56    7.71
  -2   8   2  523.20    7.17
   2  -8  -2  519.75    7.15
   2   8  -2  510.11    6.96
   2   8  -1  606.02    7.69
  -2   8   1  611.02    7.46
  -2   8   1  598.68    8.28
   2  -8  -1  602.42    8.59
   2   8  -1  614.83    8.36
  -2   8   1  606.43    7.93
   2  -8  -1  611.89    7.94
   2   8  -1  602.09    7.89
   2   8   0  167.92    3.23
  -2  -8   0  165.08    3.40
  -2   8   0  170.55    2.90
  -2   8   0  169.71    3.58
   2   8   0  164.17    3.58
   2  -8   0  170.10    3.78
   2   8   0  163.23    3.30
  -2   8   0  174.34    3.30
   2  -8   0  174.25    3.25
   2   8   1  734.97    9.09
  -2  -8  -1  732.17    9.30
  -2   8  -1  730.31    8.37
  -2   8  -1  713.64    9.43
   2   8   1  725.65    9.61
  -2   8  -1  740.09    8.95
   2  -8   1  732.17    8.84
   2   8   1  726.84    9.24
   2   8   2 1018.14   11.90
  -2  -8  -2 1009.50   12.06
  -2   8  -2 1008.57   11.00
   2  -8   2 1005.06   11.42
   2   8   2  988.19   12.11
  -2   8  -2 1006.19   12.15
   2  -8   2 1003.59   12.45
  -2   8  -2 1009.43   11.52
   2   8   2 1027.19   12.10
  -2   8  -3   99.24    2.00
   2   8   3   94.87    2.47
   2  -8   3  101.30    2.22
  -2  -8  -3   97.31    2.56
  -2   8  -3   97.52    2.20
   2   8   3   92.29    2.58
  -2   8  -3   99.41    2.57
   2  -8   3  101.45    2.74
   2   8   3   99.35    2.74
   2   8   3   97.68    2.66
   2   8   4   24.61    1.44
   2  -8   4   24.18    1.11
  -2  -8  -4   23.33    1.35
  -2   8  -4   22.62    1.03
  -2   8  -4   23.77    1.29
   2  -8   4   21.74    1.31
   2   8   4   22.78    1.36
  -2   8  -4   22.50    0.96
   2   8   5    1.05    0.72
  -2   8  -5    1.92    0.50
  -2  -8  -5    0.65    0.69
   2  -8   5    1.37    0.54
  -2   8  -5    1.56    0.63
   2   8   5    0.69    0.68
   2  -8   5    1.28    0.69
  -2   8  -5    1.40    0.47
   2   8   6    3.28    0.94
  -2   8  -6    3.51    0.55
   2   8   6    1.57    0.81
   2   8   6    1.46    0.75
   2  -8   6    2.35    0.56
  -2   8  -6    2.81    0.69
   2  -8   6    2.21    0.74
   2   8   6    3.09    0.81
  -2   8  -6    2.32    0.56
  -2   8  -7    5.54    0.63
   2   8   7    5.22    0.90
  -2   8  -7    6.14    0.59
  -2   8  -7    5.19    0.79
   2   8   7    3.76    1.03
  -2   8  -7    6.39    0.72
   2   8   7    4.74    0.94
   2  -8   7    6.09    0.88
  -2  -8  -7    4.50    0.93
   2   8   8  525.18    7.43
  -2   8  -8  529.33    5.92
   2   8   8  528.99    8.31
   2   8   8  536.15    7.70
  -2   8  -8  532.47    7.00
  -2   8  -8  528.52    6.42
  -2  -8  -8  517.89    7.84
  -2   8  -8  531.64    6.77
   2   8   9   14.22    1.52
  -2   8  -9   13.69    0.96
  -2  -8  -9   12.82    1.27
   2   8   9   12.50    1.16
   2   8  10    5.29    1.31
   2   8  10    4.93    0.96
  -2  -8 -10    5.64    1.13
   2   8  11   73.98    2.29
  -2  -8 -11   76.67    2.68
  -2  -8 -12    2.01    1.14
   2  -9 -11    1.04    1.11
   2  -9 -10   17.87    1.67
   2  -9 -10   19.15    1.41
  -2   9  10   16.49    1.61
  -2   9   9  140.27    3.77
   2  -9  -9  149.01    3.97
   2   9  -9  144.22    3.26
   2  -9  -9  148.35    3.60
   2   9  -9  146.92    3.65
   2   9  -8  124.59    3.31
  -2   9   8  122.68    3.39
   2   9  -8  128.16    2.48
   2   9  -8  129.58    3.09
   2  -9  -8  128.57    3.39
   2   9  -8  123.61    2.88
   2  -9  -8  128.56    3.61
   2   9  -7  171.72    3.85
  -2   9   7  170.25    3.90
   2   9  -7  183.31    3.14
  -2   9   7  173.21    3.83
   2  -9  -7  179.59    4.06
   2   9  -7  169.96    3.68
   2  -9  -7  171.78    4.13
   2   9  -7  175.36    3.50
   2   9  -6  220.43    4.41
  -2   9   6  215.51    4.36
   2   9  -6  225.00    3.65
  -2   9   6  230.83    4.50
   2   9  -6  221.20    4.31
   2  -9  -6  222.89    4.66
   2  -9  -6  218.68    4.61
   2   9  -6  215.47    4.00
  -2   9   5    2.14    0.81
  -2   9   5    1.50    0.84
   2   9  -5    2.15    0.64
   2   9  -5    1.81    0.70
  -2  -9   5    3.07    0.87
  -2   9   5    3.02    0.91
   2  -9  -5    1.75    0.90
   2   9  -5    2.07    0.79
   2   9  -5    1.36    0.72
   2   9  -4  257.91    4.11
   2   9  -4  250.25    4.60
  -2  -9   4  261.07    4.78
  -2   9   4  250.73    4.47
  -2   9   4  251.31    4.80
   2  -9  -4  253.61    5.07
   2   9  -4  260.95    4.80
  -2   9   4  250.30    4.73
   2   9  -4  256.61    4.43
   2   9  -3   25.41    1.24
  -2  -9   3   25.94    1.49
   2   9  -3   23.90    1.39
  -2   9   3   25.61    1.30
   2  -9  -3   29.93    1.70
   2   9  -3   24.76    1.50
  -2   9   3   24.05    1.43
   2   9  -3   26.69    1.39
   2   9  -2 1540.15   16.73
  -2  -9   2 1520.04   17.43
  -2   9   2 1533.15   17.64
  -2   9   2 1516.89   16.74
   2   9  -2 1554.07   17.68
   2  -9  -2 1519.38   18.01
  -2   9   2 1534.46   17.28
   2   9  -2 1528.36   17.06
   2  -9  -2 1534.08   17.28
   2   9  -1  457.44    6.41
  -2   9   1  464.20    7.07
  -2   9   1  457.63    6.22
   2   9  -1  453.95    7.09
   2  -9  -1  477.29    7.43
   2  -9  -1  463.17    6.64
   2   9  -1  473.08    6.73
  -2   9   1  469.32    6.71
   2   9   0  216.60    3.90
  -2   9   0  206.74    3.48
  -2   9   0  215.73    4.28
   2  -9   0  212.76    4.48
   2   9   0  208.30    4.32
   2   9   0  213.28    4.03
  -2   9   0  209.05    3.89
   2  -9   0  213.86    3.87
   2   9   1   40.13    1.63
  -2  -9  -1   40.95    1.76
   2  -9   1   42.01    1.56
  -2   9  -1   40.51    1.33
  -2   9  -1   41.60    1.79
   2   9   1   40.58    1.85
  -2   9  -1   42.80    1.60
   2   9   1   39.61    1.71
   2   9   2   33.87    1.56
   2  -9   2   36.01    1.42
  -2  -9  -2   39.33    1.72
  -2   9  -2   37.02    1.24
   2   9   2   37.10    1.68
  -2   9  -2   39.26    1.25
  -2   9  -2   37.41    1.72
   2  -9   2   38.29    1.83
  -2   9  -2   36.80    1.48
   2   9   2   40.06    1.73
  -2   9  -3   31.83    1.17
   2   9   3   31.88    1.53
  -2  -9  -3   30.78    1.58
   2  -9   3   35.44    1.41
   2   9   3   32.02    1.65
  -2   9  -3   33.22    1.60
   2  -9   3   29.42    1.65
   2   9   3   32.38    1.72
  -2   9  -3   34.48    1.37
   2   9   3   32.84    1.65
  -2   9  -4  843.64    9.63
   2   9   4  832.39   10.52
   2  -9   4  831.41    9.96
   2   9   4  827.84   10.97
  -2   9  -4  825.36   10.61
   2   9   4  817.16   10.98
   2  -9   4  848.13   10.94
  -2  -9  -4  844.62   10.79
  -2   9  -4  829.28    9.89
  -2   9  -5   73.20    1.93
  -2  -9  -5   73.19    2.43
   2  -9   5   73.84    2.00
   2   9   5   72.56    2.55
  -2   9  -5   66.77    2.18
   2  -9   5   74.28    2.39
   2   9   5   69.72    2.47
  -2   9  -5   73.86    1.86
  -2   9  -6   19.57    1.01
   2   9   6   21.52    1.36
   2  -9   6   17.67    1.05
  -2   9  -6   16.38    1.20
  -2  -9  -6   17.30    1.38
  -2   9  -6   17.48    0.98
   2   9   6   21.24    1.47
   2  -9   6   18.49    1.30
   2   9   6   20.75    1.55
  -2   9  -7   43.65    1.49
   2   9   7   44.02    2.16
  -2   9  -7   46.75    1.37
   2  -9   7   48.95    1.86
  -2   9  -7   48.85    1.50
  -2  -9  -7   45.70    2.04
   2   9   7   47.24    2.03
  -2   9  -7   44.81    1.76
  -2  -9  -8   41.56    2.00
  -2   9  -8   39.11    1.60
   2   9   8   44.03    2.22
  -2   9  -8   43.27    1.47
  -2  -9  -9    5.63    1.13
   2   9   9   10.33    1.44
  -2  -9 -10  574.67    8.69
   2   9  10  557.98    9.14
  -2  -9 -11  157.79    4.01
   2 -10 -10   42.66    2.30
  -2  10  10   40.29    2.22
  -2  10   9   48.87    2.37
   2 -10  -9   56.30    2.33
   2 -10  -9   53.39    2.51
   2 -10  -8   12.07    1.42
  -2  10   8   13.07    1.39
   2  10  -8   14.37    1.23
   2 -10  -8   14.19    1.38
   2  10  -8   12.87    1.29
   2  10  -7    4.47    0.75
  -2  10   7    4.81    1.02
   2 -10  -7    3.94    1.18
   2  10  -7    3.96    0.97
   2 -10  -7    6.64    1.15
   2  10  -7    4.27    1.02
   2  10  -6   65.25    2.33
   2  10  -6   65.91    1.89
  -2  10   6   69.35    2.44
   2  10  -6   66.63    2.36
   2 -10  -6   66.46    2.56
   2 -10  -6   63.95    2.52
   2  10  -5  567.70    8.09
   2  10  -5  556.98    7.22
  -2  10   5  550.38    7.97
  -2 -10   5  548.52    8.20
   2  10  -5  539.38    8.14
   2 -10  -5  556.88    8.58
   2  10  -5  543.86    7.67
   2  10  -4   49.80    1.73
  -2  10   4   50.28    1.96
   2  10  -4   51.90    2.03
  -2 -10   4   52.49    2.13
   2 -10  -4   50.21    2.29
   2  10  -4   50.61    2.12
   2  10  -4   52.63    1.96
   2  10  -3  158.37    3.17
  -2  10   3  157.28    3.36
   2  10  -3  154.92    3.48
  -2 -10   3  160.43    3.71
   2 -10  -3  159.32    4.01
   2  10  -3  158.63    3.81
   2  10  -3  157.33    3.46
   2 -10  -3  155.79    3.63
   2  10  -2  101.05    2.51
  -2  10   2   98.80    2.49
  -2 -10   2   96.15    2.86
   2  10  -2   93.01    2.91
   2 -10  -2   94.59    3.06
   2  10  -2   95.49    2.65
  -2  10   2   95.85    2.73
   2 -10  -2   97.41    2.73
   2  10  -1 1206.23   13.83
  -2  10   1 1183.91   13.53
   2 -10  -1 1185.50   14.98
   2  10  -1 1194.53   14.73
   2 -10  -1 1198.82   14.09
   2  10  -1 1187.63   14.12
  -2  10   1 1192.37   14.13
  -2  10   0  297.77    4.64
  -2  10   0  300.55    5.53
   2  10   0  310.79    5.07
  -2  10   0  307.70    5.16
   2  10   0  313.42    5.32
   2 -10   0  311.25    5.13
   2 -10   1   14.37    1.11
  -2  10  -1   16.02    0.97
  -2  10  -1   13.45    1.23
   2  10   1   14.56    1.18
  -2  10  -1   13.83    1.12
   2  10   2  250.92    4.54
  -2 -10  -2  244.13    4.70
  -2  10  -2  238.21    3.82
   2 -10   2  247.54    4.27
  -2  10  -2  248.35    3.83
   2  10   2  247.26    4.74
  -2  10  -2  240.57    4.76
   2 -10   2  249.78    5.04
  -2  10  -2  236.83    4.30
  -2  10  -3  125.56    2.53
   2  10   3  123.09    3.07
   2 -10   3  125.39    2.84
  -2 -10  -3  123.26    3.21
   2  10   3  125.75    3.33
  -2  10  -3  117.33    3.14
   2 -10   3  120.79    3.33
  -2  10  -3  116.98    2.75
  -2  10  -4    0.44    0.63
   2 -10   4    0.72    0.67
  -2 -10  -4   -0.27    0.83
   2  10   4    0.19    0.85
   2 -10   4    0.43    0.83
  -2  10  -4    0.46    0.56
  -2  10  -5  138.65    2.92
  -2 -10  -5  141.46    3.57
   2 -10   5  140.44    3.02
   2  10   5  135.44    3.64
  -2  10  -5  138.07    3.35
   2 -10   5  140.27    3.51
  -2  10  -5  137.46    2.75
  -2  10  -6  122.92    2.58
  -2  10  -6  127.12    2.63
   2 -10   6  122.43    2.79
   2  10   6  119.67    3.49
  -2  10  -6  117.52    3.02
   2 -10   6  120.06    3.18
  -2 -10  -6  122.13    3.34
  -2  10  -6  119.05    2.64
  -2 -10  -7    1.33    1.01
  -2  10  -7    1.16    0.84
   2  10   7    0.51    1.00
  -2 -10  -8   55.12    2.32
   2  10   8   51.53    2.48
  -2 -10  -9  180.80    4.32
   2  10   9  168.80    4.52
  -2 -10 -10    7.67    1.39
   2 -11  -9    2.07    1.18
  -2  11   9    1.38    1.07
   2 -11  -8   68.75    2.67
   2 -11  -8   73.33    2.88
  -2  11   8   70.52    2.73
   2 -11  -7   20.86    1.66
   2 -11  -7   19.29    1.67
  -2  11   7   18.52    1.56
   2  11  -6   16.31    1.11
  -2  11   6   16.18    1.41
   2 -11  -6   16.31    1.53
   2  11  -6   15.11    1.38
   2  11  -5  310.92    4.91
  -2  11   5  313.03    5.55
  -2 -11   5  305.75    5.71
   2 -11  -5  305.24    6.05
   2  11  -5  309.43    5.58
   2  11  -4    3.76    0.79
  -2  11   4    3.90    0.94
  -2 -11   4    3.92    1.03
   2 -11  -4    3.96    1.07
   2 -11  -4    3.84    1.17
   2  11  -4    4.34    0.96
   2  11  -3   -0.03    0.67
   2 -11  -3    0.96    0.89
  -2 -11   3    1.17    0.93
   2  11  -3    1.09    0.78
   2 -11  -3    0.69    0.99
  -2  11   3    1.19    0.75
   2  11  -2  158.97    3.39
  -2 -11   2  153.59    3.78
   2  11  -2  155.18    3.55
  -2  11   2  156.43    3.35
   2 -11  -2  157.60    4.11
   2 -11  -2  154.86    3.67
   2  11  -1  126.69    3.05
  -2  11   1  130.48    2.92
  -2 -11   1  133.83    3.47
   2 -11  -1  134.48    3.77
   2 -11  -1  128.40    3.24
   2 -11   0    0.63    0.80
  -2  11   0    0.49    0.64
   2  11   0    1.18    0.83
  -2  11   0    0.57    0.79
   2 -11   1  114.12    2.88
  -2  11  -1  105.02    2.85
   2  11   1  109.52    3.04
  -2  11  -1  108.07    2.48
   2 -11   2   43.33    1.76
  -2 -11  -2   45.52    2.06
  -2  11  -2   42.33    1.49
  -2  11  -2   42.21    1.79
   2 -11   2   47.01    2.22
  -2  11  -2   44.56    1.52
   2  11   2   45.89    2.04
  -2  11  -3   70.33    1.86
   2  11   3   64.35    2.47
  -2  11  -3   72.65    2.25
  -2 -11  -3   66.51    2.47
   2 -11   3   70.83    2.24
   2 -11   3   71.12    2.68
  -2  11  -3   68.12    1.89
   2  11   4  111.77    3.29
  -2  11  -4  108.87    2.72
  -2 -11  -4  114.09    3.23
   2 -11   4  104.07    2.73
   2 -11   4  106.78    3.20
  -2  11  -4  111.07    2.48
  -2  11  -5   33.12    1.52
  -2 -11  -5   33.15    1.90
   2 -11   5   35.78    1.61
   2  11   5   34.56    1.99
   2 -11   5   36.84    1.93
  -2  11  -5   35.83    1.55
   2 -11   6   36.21    1.61
  -2 -11  -6   38.55    2.05
   2  11   7   55.66    2.56
  -2 -11  -7   51.65    2.35
  -2 -11  -8    3.93    1.22
   2 -12  -7  138.90    3.94
  -2  12   7  137.00    3.74
   2 -12  -6    1.31    1.11
  -2 -12   6    1.32    1.06
  -2  12   6    2.29    0.95
   2  12  -5   96.84    2.54
  -2  12   5   91.59    2.85
  -2 -12   5   95.39    3.06
   2 -12  -5   89.22    3.20
   2 -12  -5   89.96    3.05
  -2 -12   4    9.22    1.27
   2 -12  -4    9.32    1.28
  -2  12   4    8.65    1.14
   2 -12  -4    7.80    1.39
   2  12  -4    7.24    1.05
  -2 -12   3   15.77    1.47
   2 -12  -3   16.07    1.47
   2 -12  -3   17.84    1.67
  -2  12   3   15.67    1.28
   2  12  -2   45.35    1.97
  -2 -12   2   43.58    2.13
   2 -12  -2   42.54    2.04
  -2  12   2   41.18    1.80
   2 -12  -2   44.64    2.33
   2 -12  -1   43.65    1.98
  -2 -12   1   45.80    2.17
  -2  12   1   43.84    1.76
   2 -12  -1   45.50    2.34
  -2  12   0    1.77    0.74
   2  12   0    2.46    0.93
   2 -12   0    4.73    1.02
  -2 -12   0    3.88    1.10
  -2  12  -1   30.04    1.40
   2  12   1   26.85    1.68
   2 -12   1   29.67    1.60
   2 -12   2   74.83    2.44
  -2  12  -2   78.40    2.11
   2 -12   2   76.55    2.88
  -2 -12  -3   98.38    3.10
   2 -12   3   99.29    2.77
  -2  12  -3  101.27    2.37
   2  12   3   94.95    3.10
   2 -12   3   96.19    3.17
  -2 -12  -4   10.89    1.39
   2 -12   4    9.19    1.14
   2  12   4   10.37    1.33
   2 -12   4    7.54    1.25
   2 -12   5   66.78    2.28
  -2 -12  -5   66.35    2.64
   2  12   5   65.80    2.73
   2 -12   6  262.83    4.76
  -2 -12  -6  260.62    5.47
   2  12   6  268.15    5.70
  -2 -12  -7    0.28    1.06
  -2 -13   5  111.79    3.48
   2 -13  -5  118.41    3.57
  -2  13   5  114.20    3.31
   2 -13  -5  115.07    3.72
   2 -13  -4    2.72    1.17
  -2 -13   4    2.16    1.09
  -2  13   4    2.79    0.99
   2 -13  -4    2.76    1.26
   2 -13  -3    5.23    1.20
  -2 -13   3    5.12    1.18
  -2  13   3    3.18    0.95
   2 -13  -3    5.34    1.30
   2 -13  -2  174.59    4.14
  -2 -13   2  169.69    4.31
  -2  13   2  168.86    3.74
   2 -13  -2  162.93    4.51
  -2 -13   1  312.01    6.08
   2 -13  -1  307.60    5.73
  -2  13   1  306.34    5.25
   2 -13  -1  311.01    6.40
  -2  13   0    3.31    0.85
   2  13   0    5.10    1.15
   2 -13   0    3.32    0.99
  -2 -13   0    4.35    1.24
   2 -13   1   39.24    1.93
   2  13   1   40.11    2.03
   2 -13   1   44.05    2.36
   2 -13   2   29.79    1.72
   2  13   2   31.14    1.92
   2 -13   2   29.55    2.04
   2 -13   3   12.09    1.30
   2  13   3   14.01    1.50
   2 -13   4   14.74    1.36
  -2 -13  -4   15.58    1.57
   2  13   4   14.94    1.55
   2 -13   5    3.09    1.00
  -2 -13  -5    2.42    1.21
   3   0 -15   -0.58    1.00
  -3   0  14   22.93    0.69
  -3   0  14   23.65    0.65
   3   0 -14   24.18    1.69
  -3   0  14   25.86    1.98
   3   0 -13    1.19    0.85
  -3   0  13    0.41    0.39
   3   0 -12  899.01   11.64
  -3   0  12  908.13    9.86
   3   0 -11    0.09    0.77
   3   0 -11    0.80    0.76
   3   0 -11   -0.05    0.23
  -3   0  11    0.24    0.44
  -3   0  10   10.04    0.66
  -3   0  10   10.77    1.17
   3   0 -10   10.77    0.54
   3   0 -10    9.00    1.00
   3   0 -10    9.12    1.03
  -3   0   9    0.19    0.38
  -3   0   9    0.77    0.75
   3   0  -9    0.12    0.30
   3   0  -9   -0.25    0.60
   3   0  -9    0.07    0.62
   3   0  -8    3.45    0.41
  -3   0   8    4.28    0.50
  -3   0   8    3.38    0.77
   3   0  -8    4.03    0.75
   3   0  -7    0.76    0.33
  -3   0   7    0.07    0.34
  -3   0   7    0.07    0.55
   3   0  -7    1.32    0.55
   3   0  -6 3818.57   38.71
  -3   0   6 3902.25   39.05
   3   0  -6 3823.35   37.73
  -3   0   6 3886.73   37.95
   3   0  -5    0.34    0.29
  -3   0   5    1.20    0.31
  -3   0   5    1.83    0.36
   3   0  -5   -0.20    0.42
  -3   0   5    0.11    0.41
   3   0  -4   39.53    1.28
  -3   0   4   41.38    1.30
   3   0  -4   41.78    1.09
  -3   0   4   42.79    1.11
  -3   0   4   38.23    1.09
  -3   0   3   -0.04    0.34
   3   0  -3    0.39    0.31
   3   0  -1    0.54    0.26
  -3   0   1    0.15    0.24
  -3   0   1    0.51    0.22
   3   0   0    4.29    0.38
  -3   0   0    4.72    0.40
   3   0   0    3.74    0.38
  -3   0   0    4.56    0.39
  -3   0  -1    0.33    0.24
   3   0   1    0.82    0.19
  -3   0  -3    0.12    0.22
   3   0   3    0.33    0.25
   3   0   3    0.32    0.23
  -3   0  -3    0.69    0.15
   3   0   3    0.24    0.14
   3   0   3    0.59    0.23
  -3   0  -5    0.41    0.27
   3   0   5    1.50    0.34
  -3   0  -5    0.84    0.20
   3   0   5    0.22    0.25
   3   0   5    0.92    0.22
  -3   0  -5    0.96    0.37
   3   0   5    0.17    0.33
   3   0   6 5531.51   53.44
   3   0   6 5598.05   54.22
  -3   0  -6 5451.66   54.16
   3   0   6 5555.26   53.60
  -3   0  -6 5578.47   53.44
  -3   0  -6 5477.31   53.19
   3   0   7    0.56    0.26
   3   0   7   -0.05    0.46
   3   0   7    0.74    0.33
  -3   0  -7    0.66    0.27
   3   0   8   50.11    1.18
  -3   0  -8   48.64    1.61
   3   0   8   50.14    0.98
  -3   0  -8   49.08    1.16
   3   0   8   48.32    1.64
   3   0   9    0.23    0.32
  -3   0  -9    0.61    0.60
   3   0   9    0.03    0.65
   3   0   9    0.13    0.18
   3   0   9    1.56    0.20
  -3   0  -9    0.19    0.35
  -3   0 -10 1991.36   21.45
  -3   0 -10 1977.70   20.09
   3   0  10 1956.01   21.64
   3   0  10 1971.20   19.66
  -3   0 -11    1.88    0.49
  -3   0 -11    0.27    0.76
   3   0  11    0.48    0.77
   3   0  12  152.58    3.77
  -3   0 -12  149.55    2.64
  -3   0 -12  156.12    3.59
   3   0  13   -0.43    0.96
   3   0  14  203.52    4.78
   3   1 -15   14.08    1.40
   3  -1 -15   13.60    1.39
  -3   1  14   10.87    0.73
   3  -1 -14   12.25    1.37
   3   1 -14   11.80    1.30
  -3  -1  14   10.23    1.50
   3  -1 -13    0.74    0.88
   3   1 -13    1.43    0.93
  -3  -1  13    0.84    0.20
  -3   1  13    0.59    0.50
  -3  -1  13    0.56    0.21
  -3  -1  13    0.38    1.08
  -3   1  12   45.66    1.39
  -3  -1  12   47.81    1.04
   3   1 -12   52.49    2.12
   3  -1 -12   47.38    2.10
  -3   1  12   45.56    2.35
   3  -1 -11  285.85    5.11
   3   1 -11  285.91    5.06
  -3  -1  11  290.32    3.44
   3  -1 -11  273.66    4.93
   3   1 -11  279.82    4.90
   3  -1 -11  281.47    3.26
  -3   1  11  281.42    5.53
   3  -1 -10  101.85    2.81
   3   1 -10  105.48    2.86
   3  -1 -10  101.85    1.84
   3   1 -10  103.90    1.63
  -3  -1  10  104.51    1.87
   3  -1 -10  104.22    2.78
  -3   1  10  105.72    3.14
   3  -1  -9  109.47    2.76
   3   1  -9  104.42    1.75
   3  -1  -9  104.26    1.94
   3  -1  -9  103.14    2.69
   3   1  -9  104.58    2.74
  -3   1   9  105.90    2.99
   3  -1  -8  279.65    4.71
  -3   1   8  285.96    3.77
  -3  -1   8  269.42    3.74
   3  -1  -8  280.59    3.82
   3   1  -8  290.20    3.64
   3  -1  -8  284.82    4.70
  -3  -1   8  281.12    5.02
  -3   1   8  281.21    5.01
   3   1  -8  281.67    4.74
  -3   1   7    0.08    0.33
  -3  -1   7    0.88    0.36
  -3   1   7    0.75    0.62
  -3  -1   7    0.47    0.55
   3  -1  -7    0.38    0.34
   3   1  -7    1.46    0.35
   3  -1  -7    0.43    0.50
   3   1  -7    0.10    0.59
   3  -1  -7    0.12    0.54
  -3  -1   6  433.70    5.27
   3  -1  -6  428.10    5.27
   3   1  -6  439.24    5.23
  -3   1   6  429.98    5.27
   3  -1  -6  437.42    5.95
  -3   1   6  439.94    6.17
   3   1  -6  421.84    6.04
  -3  -1   6  437.66    6.21
   3  -1  -6  432.76    5.90
  -3   1   5    0.97    0.47
   3   1  -5    0.37    0.45
  -3  -1   5    0.56    0.41
  -3  -1   5    1.29    0.33
  -3   1   5    0.69    0.31
   3   1  -5    1.50    0.33
   3  -1  -5    0.55    0.30
  -3   1   4   98.88    1.87
   3  -1  -4   96.57    1.83
  -3  -1   4   98.34    2.16
   3   1  -4  101.23    2.15
  -3   1   4   98.66    2.13
   3   1  -3 5586.23   54.56
   3  -1  -2 3197.86   31.42
  -3  -1   2 3255.86   31.48
  -3   1   2 3141.02   31.28
   3   1  -2 3163.47   31.50
   3   1  -2 3077.05   31.43
   3   1  -2 3255.02   31.39
  -3   1   1 1844.15   18.71
   3   1  -1 1856.29   18.75
  -3   1   1 1826.45   18.31
   3   1  -1 1867.57   18.68
  -3  -1   1 1859.53   18.65
   3  -1  -1 1824.16   18.72
  -3  -1   0  761.37    8.08
   3   1   0  734.77    8.09
   3  -1   0  710.95    7.54
  -3   1   0  727.79    8.06
   3   1   0  746.23    8.17
   3  -1   0  738.05    8.13
  -3   1   0  746.52    8.12
  -3  -1  -1  110.53    1.77
  -3   1  -1  115.39    1.94
   3   1   1  111.43    1.99
  -3   1  -1  111.96    1.94
  -3  -1  -1  118.34    1.93
   3   1   1  110.63    1.95
  -3  -1  -2  176.12    2.57
  -3   1  -2  176.09    2.58
  -3   1  -2  179.93    2.64
   3  -1   2  180.60    1.99
  -3  -1  -2  178.17    2.38
   3  -1   2  180.15    2.21
   3   1   2  180.72    2.33
  -3  -1  -3    0.47    0.24
  -3   1  -3    0.43    0.24
  -3   1  -3    1.63    0.29
   3   1   3    0.52    0.27
  -3  -1  -3    2.00    0.25
   3  -1   3    0.97    0.21
   3   1   4  230.89    3.21
  -3   1  -4  232.54    3.12
   3   1   4  219.70    3.38
  -3   1  -4  225.93    3.03
   3  -1   4  230.67    3.06
   3  -1   4  226.23    3.10
  -3   1  -4  233.16    3.03
  -3  -1  -4  235.70    3.13
   3   1   4  223.89    3.20
  -3  -1  -4  234.41    2.90
   3   1   4  227.02    2.95
   3   1   5  204.66    2.95
   3   1   5  206.37    3.29
  -3  -1  -5  209.85    3.24
  -3   1  -5  204.37    3.00
   3  -1   5  201.54    2.99
   3  -1   5  208.01    2.83
  -3  -1  -5  203.82    2.91
   3   1   5  202.93    2.99
  -3   1  -5  202.95    2.68
  -3  -1  -5  205.42    2.72
   3   1   5  203.14    2.79
   3  -1   6  407.10    5.27
  -3   1  -6  406.71    4.61
  -3  -1  -6  406.36    5.03
   3   1   6  400.46    5.04
   3   1   6  404.75    4.93
   3   1   6  409.80    5.58
  -3   1  -6  409.70    5.24
  -3  -1  -6  412.17    5.49
   3  -1   6  409.00    4.76
   3   1   6  407.71    4.88
  -3   1  -6  411.39    4.28
  -3  -1  -6  410.18    4.85
   3  -1   7   72.41    1.84
  -3   1  -7   72.55    1.29
   3   1   7   72.75    1.58
   3   1   7   75.16    1.46
   3   1   7   74.90    1.99
  -3   1  -7   74.39    1.81
  -3  -1  -7   71.01    1.92
   3  -1   7   72.52    1.32
   3   1   7   70.43    1.50
  -3   1  -7   71.74    1.17
  -3  -1  -7   70.64    1.49
   3  -1   8  488.60    6.48
   3   1   8  469.65    5.75
   3   1   8  479.59    5.42
   3   1   8  482.95    6.68
  -3  -1  -8  489.40    6.60
  -3   1  -8  482.19    6.36
   3  -1   8  465.94    5.18
   3   1   8  478.77    5.36
  -3  -1  -8  478.53    5.77
  -3   1  -8  473.26    5.27
   3  -1   9  121.79    2.83
   3   1   9  125.72    1.78
  -3  -1  -9  125.62    2.89
  -3   1  -9  122.98    2.72
   3   1   9  122.11    2.92
   3   1   9  120.60    2.17
   3   1   9  126.64    1.82
  -3  -1  -9  121.40    2.26
  -3   1  -9  123.41    1.94
   3   1  10  259.82    3.59
  -3  -1 -10  257.44    4.63
  -3   1 -10  264.55    4.50
   3   1  10  255.99    4.72
   3  -1  10  255.31    4.62
  -3  -1 -10  256.95    3.81
  -3   1 -10  256.01    3.41
   3   1  11    3.14    0.90
  -3  -1 -11    3.72    0.88
  -3   1 -11    2.53    0.75
  -3   1 -11    2.51    0.46
  -3  -1 -11    2.83    0.59
   3  -1  11    3.12    0.93
   3   1  11    3.70    0.50
   3   1  12   31.06    0.94
  -3  -1 -12   30.82    1.67
  -3   1 -12   31.78    1.61
  -3   1 -12   30.07    1.01
  -3  -1 -12   32.29    1.25
   3  -1  12   31.12    1.72
   3   1  12   29.55    1.77
   3  -1  13  114.77    3.33
   3   1  13  111.79    3.42
   3   1  14  113.39    3.58
   3  -1  14  115.31    3.51
   3  -2 -14    3.66    1.15
  -3   2  14    3.17    0.63
   3   2 -14    4.18    1.07
  -3  -2  14    5.41    1.32
   3   2 -13   94.10    2.84
   3  -2 -13   89.66    2.98
  -3  -2  13   95.81    3.32
  -3   2  13   86.88    3.26
   3   2 -12 1119.74   13.48
   3  -2 -12 1094.02   13.79
  -3   2  12 1075.58   14.44
  -3  -2  12 1083.99   14.39
  -3   2  11    5.79    1.13
  -3  -2  11    6.25    0.39
   3  -2 -11    6.00    1.02
   3   2 -11    5.62    1.01
   3   2 -11    5.12    0.29
   3  -2 -11    5.64    0.53
   3   2 -11    5.43    0.30
   3  -2 -11    4.86    1.02
   3  -2 -10  254.73    4.81
  -3   2  10  254.94    3.53
  -3  -2  10  257.63    3.22
   3   2 -10  256.33    3.19
   3   2 -10  257.34    3.18
   3  -2 -10  259.93    4.84
   3  -2 -10  261.99    3.68
   3   2 -10  262.69    4.80
  -3   2  10  255.10    5.13
   3  -2  -9   84.48    2.47
   3   2  -9   88.83    1.62
  -3   2   9   89.79    1.80
  -3  -2   9   90.62    1.60
   3  -2  -9   89.85    1.90
   3  -2  -9   88.64    2.51
  -3   2   9   90.18    2.74
   3   2  -9   89.67    2.54
   3  -2  -8  314.44    5.13
  -3  -2   8  327.70    4.05
   3  -2  -8  323.49    4.44
  -3   2   8  321.84    4.30
   3   2  -8  318.02    4.10
   3  -2  -8  322.83    5.21
   3   2  -8  325.88    5.28
  -3   2   8  322.37    5.45
  -3  -2   7  340.10    4.30
   3  -2  -7  351.17    4.67
  -3   2   7  345.30    4.55
   3   2  -7  345.99    4.44
   3  -2  -7  349.86    5.32
  -3   2   7  349.62    5.51
   3   2  -7  355.45    5.44
  -3  -2   7  352.13    5.56
  -3  -2   6 1573.22   16.00
  -3   2   6 1570.28   16.27
   3   2  -6 1569.89   16.16
   3  -2  -6 1544.01   16.99
  -3  -2   6 1566.06   17.29
   3   2  -6 1559.21   17.16
  -3   2   6 1546.72   17.15
   3  -2  -6 1571.69   16.39
   3   2  -5   -0.14    0.31
  -3  -2   5    0.24    0.28
  -3   2   5    0.27    0.34
   3  -2  -5    0.63    0.34
   3  -2  -5    0.24    0.43
  -3   2   5    0.85    0.49
  -3  -2   4   20.29    0.77
  -3   2   4   22.30    0.86
   3   2  -4   20.72    0.79
   3  -2  -4   20.08    0.85
  -3  -2   4   24.51    1.05
   3  -2  -4   21.47    0.97
   3   2  -4   21.32    0.98
  -3   2   4   21.30    0.97
   3   2  -3 1330.85   14.04
  -3  -2   3 1366.80   14.42
   3   2  -3 1347.51   14.27
   3  -2  -3 1363.66   14.20
   3  -2  -3 1356.47   14.32
  -3   2   3 1341.42   14.19
   3   2  -3 1353.88   14.47
   3   2  -2    0.56    0.29
   3  -2  -2    1.77    0.37
   3   2  -2    1.00    0.33
   3  -2  -2    0.74    0.27
   3   2  -2    0.87    0.33
   3   2  -1    7.18    0.51
  -3  -2   1    7.90    0.53
   3   2  -1    7.24    0.50
  -3  -2   1    8.50    0.51
   3   2  -1    8.37    0.53
   3  -2  -1    8.09    0.39
   3  -2  -1    9.01    0.57
  -3   2   1    8.49    0.54
  -3   2   0  255.51    2.85
  -3  -2   0  264.53    3.53
   3  -2   0  260.40    3.60
  -3   2   0  263.09    3.58
   3   2   0  260.38    3.56
  -3  -2   0  262.28    3.47
   3  -2   0  261.02    2.84
  -3  -2  -1  422.17    5.05
  -3   2  -1  421.04    5.17
   3  -2   1  420.75    4.62
   3   2   1  436.10    5.22
  -3  -2  -1  436.29    5.12
  -3   2  -2  866.15    9.39
  -3  -2  -2  880.03    9.22
  -3  -2  -2  841.72    9.33
   3  -2   2  863.88    8.52
   3   2   2  865.08    9.15
  -3   2  -3  928.06    9.31
  -3  -2  -3  923.00   10.01
  -3   2  -3  932.01    9.99
  -3   2  -3  930.07    9.86
  -3  -2  -3  933.29    9.80
   3  -2   3  954.63   10.02
   3  -2   3  921.39    9.35
   3   2   3  912.92    9.84
  -3   2  -4  464.39    5.51
  -3  -2  -4  478.29    5.83
   3   2   4  482.99    5.87
  -3   2  -4  491.20    5.72
  -3   2  -4  482.36    5.37
   3  -2   4  501.51    5.74
   3  -2   4  492.54    5.43
  -3  -2  -4  487.74    5.63
   3   2   4  487.66    5.71
  -3  -2  -5  887.36    9.94
  -3   2  -5  918.04    9.43
   3   2   5  902.09    9.90
  -3   2  -5  897.88    9.65
  -3   2  -5  880.83    9.60
   3  -2   5  910.73    9.69
   3   2   5  893.94    9.80
  -3  -2  -5  911.05    9.71
   3  -2   5  897.33    9.68
   3  -2   6   36.60    1.16
  -3   2  -6   34.17    0.80
   3   2   6   35.97    1.12
  -3   2  -6   36.16    0.97
  -3  -2  -6   34.05    1.30
   3   2   6   34.79    1.35
  -3   2  -6   34.78    1.08
   3  -2   6   35.13    0.99
   3   2   6   36.82    1.12
  -3  -2  -6   35.32    1.06
   3  -2   7    5.03    0.62
  -3   2  -7    4.74    0.55
  -3  -2  -7    4.74    0.67
   3   2   7    4.54    0.67
  -3   2  -7    5.33    0.32
   3   2   7    4.59    0.53
   3   2   7    5.00    0.47
   3  -2   7    5.07    0.41
   3   2   7    4.78    0.45
  -3  -2  -7    4.34    0.51
   3   2   7    4.58    0.51
  -3   2  -7    5.11    0.22
   3  -2   8   37.46    1.41
  -3   2  -8   36.43    1.32
   3   2   8   35.99    1.56
  -3  -2  -8   36.72    1.51
   3   2   8   37.48    1.18
   3   2   8   36.80    1.06
  -3   2  -8   37.44    0.73
   3  -2   8   37.73    0.90
   3   2   8   37.72    1.23
   3   2   8   38.44    1.06
  -3   2  -8   37.25    0.73
  -3  -2  -8   38.10    1.23
   3  -2   9  170.34    3.37
  -3   2  -9  174.14    3.23
  -3  -2  -9  174.74    3.54
   3   2   9  170.21    3.62
   3   2   9  177.24    2.87
   3   2   9  170.81    2.50
  -3   2  -9  169.55    2.18
   3   2   9  171.31    2.52
  -3  -2  -9  172.42    2.95
  -3   2  -9  170.83    2.20
  -3   2 -10  628.54    8.08
  -3  -2 -10  620.41    8.50
   3   2  10  616.03    8.64
   3   2  10  609.98    7.34
   3   2  10  613.84    6.61
   3   2  10  613.54    6.66
  -3   2 -10  605.92    6.60
   3  -2  10  602.80    8.31
  -3  -2 -10  624.40    7.60
  -3   2 -10  625.31    6.64
   3   2  11  256.43    3.69
  -3   2 -11  234.40    3.08
   3   2  11  238.85    4.82
   3  -2  11  237.09    4.58
  -3  -2 -11  242.81    3.92
  -3   2 -11  240.72    3.12
  -3   2 -11  248.73    4.39
  -3  -2 -11  249.42    4.72
   3   2  12  108.03    2.14
  -3   2 -12  109.79    2.86
  -3  -2 -12  111.29    2.47
   3   2  12  106.65    3.22
   3  -2  12  108.90    3.06
   3   2  13    6.44    1.29
  -3   2 -13    5.42    1.00
  -3  -2 -13    5.17    0.76
   3  -2  13    3.46    1.08
   3   2  13    4.50    0.59
   3  -2  14  201.06    4.62
   3   2  14  208.85    4.94
   3  -3 -14   57.75    2.55
  -3  -3  14   58.76    2.77
   3   3 -14   57.90    2.32
   3  -3 -13   21.70    1.66
   3   3 -13   24.70    1.59
  -3   3  13   23.96    1.92
  -3  -3  13   28.07    1.95
   3  -3 -12   14.04    1.38
  -3   3  12   17.39    1.64
  -3  -3  12   15.95    1.52
   3  -3 -12   14.74    0.74
  -3   3  12   15.20    0.73
  -3   3  11  529.60    6.38
  -3   3  11  527.61    8.48
   3   3 -11  547.65    8.03
  -3  -3  11  535.38    8.45
   3   3 -11  523.40    5.71
   3  -3 -11  551.92    6.55
   3  -3 -11  538.24    8.14
   3   3 -11  541.66    5.80
   3  -3 -11  534.00    8.08
   3  -3 -10   14.72    1.25
  -3  -3  10   16.04    0.54
   3   3 -10   17.48    0.70
   3  -3 -10   16.37    1.28
   3  -3 -10   16.17    0.89
  -3  -3  10   14.56    1.35
   3   3 -10   17.05    1.30
  -3   3  10   16.55    0.84
   3   3 -10   16.29    0.67
   3   3  -9    9.86    1.05
  -3  -3   9   10.61    0.50
   3   3  -9   10.50    0.63
  -3   3   9    9.35    0.70
   3   3  -9   10.37    0.59
   3  -3  -9    9.91    1.04
   3  -3  -9    9.56    0.73
  -3   3   9   10.14    1.13
  -3  -3   8   10.08    0.52
   3  -3  -8   11.05    0.79
   3   3  -8   10.90    0.66
  -3   3   8   11.92    0.74
   3  -3  -8   10.87    1.00
   3   3  -8   10.74    1.03
  -3   3   8    9.27    1.04
  -3  -3   7   63.23    1.30
  -3   3   7   61.95    1.58
   3   3  -7   62.08    1.50
   3  -3  -7   65.44    1.73
   3  -3  -7   61.13    1.98
   3   3  -7   62.99    2.03
  -3   3   7   60.66    2.00
  -3  -3   6  253.87    3.36
   3   3  -6  254.02    3.50
   3  -3  -6  262.89    3.98
  -3   3   6  261.00    3.80
  -3   3   6  258.21    4.30
   3   3  -6  260.35    4.39
   3  -3  -6  253.20    4.35
   3   3  -6  262.06    4.10
   3   3  -5 3016.56   30.50
  -3  -3   5 3036.17   30.83
   3   3  -5 2945.03   29.82
  -3  -3   5 3005.10   29.69
   3  -3  -5 3039.11   30.41
  -3   3   5 3096.85   30.19
   3  -3  -5 2897.90   30.78
  -3   3   5 3050.43   30.64
   3   3  -5 3037.73   30.88
   3  -3  -4  234.26    3.57
   3   3  -4  234.63    3.66
  -3  -3   4  238.72    3.82
  -3  -3   4  243.69    3.25
   3   3  -4  237.72    3.36
   3  -3  -4  244.87    3.71
  -3   3   4  238.73    3.54
   3  -3  -4  237.10    3.83
  -3   3   4  237.63    3.64
   3   3  -4  227.15    3.85
  -3  -3   3 1212.45   12.58
   3   3  -3 1223.18   12.75
   3  -3  -3 1224.38   13.16
   3   3  -3 1210.04   13.01
   3  -3  -3 1177.17   12.71
   3   3  -3 1176.36   13.21
  -3   3   3 1207.92   12.80
   3   3  -2   99.76    1.89
   3   3  -2   95.68    2.03
   3   3  -2   97.95    1.95
  -3  -3   2   97.67    2.04
  -3   3   2   95.94    1.95
   3  -3  -2  101.60    2.08
  -3   3   2   96.10    1.72
   3  -3  -2   98.83    1.69
   3   3  -1    1.67    0.35
   3  -3  -1    1.29    0.38
  -3   3   1    1.19    0.36
   3  -3  -1    1.53    0.22
  -3   3   1    1.26    0.24
  -3   3   1    1.33    0.32
  -3   3   0  384.08    4.09
  -3  -3   0  382.29    4.84
   3   3   0  387.16    4.91
  -3  -3   0  391.40    4.96
   3  -3   0  391.72    4.05
   3  -3   0  395.15    5.12
  -3   3   0  391.26    4.97
  -3   3   0  389.46    4.60
   3  -3   0  387.68    4.64
  -3  -3  -1  528.36    6.27
   3   3   1  538.00    6.33
  -3   3  -1  532.82    6.34
  -3  -3  -1  539.53    6.29
  -3   3  -1  529.55    5.77
   3  -3   1  524.86    5.79
  -3  -3  -2 2128.37   21.54
  -3  -3  -2 2100.35   21.43
  -3   3  -2 2099.53   21.50
  -3   3  -2 2169.34   20.69
   3  -3   2 2093.92   20.66
  -3   3  -3 3698.01   35.40
  -3  -3  -3 3691.62   36.63
  -3  -3  -3 3724.49   36.38
   3  -3   3 3658.96   36.62
  -3   3  -3 3662.08   36.45
   3  -3   3 3717.57   35.43
   3   3   3 3647.79   36.42
   3   3   4  340.78    4.55
  -3  -3  -4  343.87    4.70
  -3   3  -4  354.88    4.47
  -3   3  -4  343.70    4.24
  -3   3  -4  343.78    3.89
   3  -3   4  340.34    4.55
   3  -3   4  336.88    3.95
   3   3   4  339.63    4.53
  -3  -3  -4  345.06    4.50
  -3   3  -5  583.80    6.31
   3   3   5  567.36    6.79
  -3   3  -5  562.94    6.57
  -3   3  -5  552.92    6.28
   3  -3   5  559.83    6.70
   3   3   5  569.68    6.84
  -3  -3  -5  566.05    6.74
   3  -3   5  553.55    6.39
   3  -3   6   56.81    1.42
  -3   3  -6   57.17    1.12
   3   3   6   54.11    1.46
  -3   3  -6   56.05    1.32
  -3   3  -6   55.14    1.33
   3  -3   6   55.14    1.38
   3   3   6   56.20    1.41
  -3  -3  -6   56.18    1.49
   3   3   6   54.79    1.51
   3  -3   7    4.63    0.58
  -3   3  -7    3.46    0.41
   3   3   7    3.05    0.52
  -3   3  -7    3.92    0.29
   3   3   7    2.90    0.67
  -3   3  -7    2.59    0.47
   3  -3   7    3.07    0.42
   3   3   7    3.02    0.46
   3   3   7    3.68    0.56
   3  -3   8  108.26    2.44
   3   3   8  109.08    2.24
  -3   3  -8  112.65    1.83
   3   3   8  108.02    2.80
  -3   3  -8  110.32    2.30
  -3  -3  -8  109.61    2.71
   3   3   8  110.29    2.35
   3  -3   8  112.30    1.90
   3   3   8  112.07    2.15
  -3  -3  -8  109.99    2.35
   3  -3   9  232.99    4.04
   3   3   9  231.65    4.44
  -3   3  -9  227.98    3.80
  -3  -3  -9  225.16    4.28
   3   3   9  232.85    3.61
   3   3   9  233.28    3.38
  -3   3  -9  221.43    2.50
   3   3   9  228.70    3.37
   3  -3   9  230.56    2.84
   3   3   9  234.16    3.81
  -3   3  -9  223.47    2.55
  -3  -3  -9  228.29    3.75
  -3  -3 -10   33.82    1.70
   3   3  10   31.40    1.71
  -3   3 -10   35.37    1.45
   3   3  10   33.33    1.24
   3   3  10   34.84    1.06
  -3   3 -10   36.12    0.71
   3   3  10   35.42    1.07
   3  -3  10   35.73    1.58
  -3  -3 -10   34.15    1.40
  -3   3 -10   32.02    0.70
   3   3  11  531.95    6.71
   3   3  11  533.92    5.92
   3   3  11  549.41    5.97
   3  -3  11  530.72    7.66
  -3  -3 -11  530.34    7.88
  -3   3 -11  547.20    7.35
   3   3  11  537.00    8.17
  -3  -3 -11  542.38    7.09
  -3   3 -12   15.68    1.19
   3   3  12   15.38    1.46
   3  -3  12   16.04    1.32
  -3  -3 -12   14.74    1.06
   3   3  12   15.80    0.96
   3  -3  13  399.51    6.70
   3   3  13  417.77    7.27
  -3  -3 -13  400.16    5.93
   3   3  13  407.99    5.45
   3   4 -14   83.68    2.72
  -3  -4  14   85.20    3.23
   3  -4 -14   84.67    3.06
  -3   4  13   29.03    1.00
  -3   4  13   28.01    2.02
  -3  -4  13   27.68    1.94
   3  -4 -13   24.17    1.81
  -3   4  12   26.39    1.06
   3  -4 -12   28.19    1.11
  -3   4  12   26.28    1.89
  -3  -4  12   30.31    1.92
  -3   4  11   86.47    1.97
   3   4 -11   84.14    1.55
   3  -4 -11   84.10    2.79
   3   4 -11   87.40    2.49
   3  -4 -11   84.42    2.03
   3   4 -11   84.45    1.60
  -3   4  11   90.67    3.07
   3   4 -11   83.38    2.72
  -3  -4  11   91.14    2.99
  -3   4  10  136.88    2.60
   3   4 -10  136.25    2.29
   3  -4 -10  126.43    3.41
   3   4 -10  133.54    3.06
   3   4 -10  136.28    2.31
   3  -4 -10  133.60    2.72
   3   4 -10  136.65    3.39
  -3  -4  10  135.58    3.56
  -3   4  10  135.55    3.60
  -3   4   9  194.95    4.25
  -3  -4   9  200.35    4.26
   3   4  -9  197.85    4.11
  -3  -4   9  201.11    2.68
   3   4  -9  203.23    3.13
  -3   4   9  205.82    3.36
   3   4  -9  194.69    3.76
   3   4  -9  200.92    3.09
   3  -4  -9  196.13    3.51
   3  -4  -9  205.72    4.24
  -3   4   8   79.53    2.45
   3   4  -8   80.04    2.42
  -3  -4   8   78.66    1.47
   3   4  -8   78.65    1.79
  -3  -4   8   74.67    2.41
   3   4  -8   74.32    2.12
  -3   4   8   81.44    1.93
   3   4  -8   78.80    1.74
   3  -4  -8   78.85    2.07
   3  -4  -8   80.76    2.46
   3  -4  -7  567.62    7.79
  -3  -4   7  582.36    6.59
   3   4  -7  584.65    6.76
   3   4  -7  595.39    7.64
  -3   4   7  591.30    7.26
   3  -4  -7  588.98    7.56
   3  -4  -7  592.34    8.14
  -3   4   7  597.90    8.01
   3   4  -7  605.67    8.11
  -3   4   6    0.35    0.55
   3  -4  -6    0.12    0.50
   3   4  -6    2.28    0.41
  -3  -4   6    1.59    0.35
   3   4  -6    0.58    0.55
  -3   4   6   -0.02    0.42
   3  -4  -6    0.80    0.50
   3   4  -6    0.28    0.56
   3   4  -5   69.25    1.57
  -3  -4   5   69.96    1.48
   3   4  -5   69.75    1.84
   3  -4  -5   69.97    1.85
   3  -4  -5   70.54    1.91
  -3   4   5   70.95    1.78
   3  -4  -5   69.23    2.02
  -3   4   5   68.52    1.85
   3   4  -5   69.28    2.02
   3   4  -4  326.66    4.94
  -3   4   4  331.06    4.65
  -3  -4   4  331.31    4.26
   3   4  -4  328.90    4.39
   3   4  -4  337.77    4.75
   3  -4  -4  328.73    4.60
  -3   4   4  328.81    4.65
   3  -4  -4  330.94    4.90
  -3   4   4  337.99    4.82
   3  -4  -4  326.08    4.91
  -3  -4   3   86.37    1.73
   3   4  -3   83.82    1.77
   3   4  -3   85.04    1.93
   3   4  -3   87.19    2.07
   3  -4  -3   88.45    1.80
   3  -4  -3   83.25    2.07
  -3   4   3   82.69    1.93
  -3   4   3   84.46    1.78
   3   4  -2    7.14    0.55
   3   4  -2    6.55    0.57
   3   4  -2    5.94    0.60
  -3  -4   2    6.80    0.62
   3  -4  -2    6.55    0.46
  -3   4   2    6.59    0.60
   3  -4  -2    7.66    0.68
  -3   4   2    8.05    0.59
  -3   4   2    6.17    0.47
  -3   4   1  237.03    2.99
   3  -4  -1  238.13    2.99
   3   4  -1  243.49    3.52
  -3  -4   1  235.28    3.68
   3   4  -1  242.17    3.50
  -3   4   1  235.79    3.64
   3  -4  -1  236.60    3.84
  -3   4   1  237.02    3.41
   3  -4  -1  232.34    3.47
  -3   4   0 2828.59   27.69
  -3  -4   0 2858.74   28.86
   3   4   0 2872.54   28.64
   3   4   0 2838.59   28.66
  -3  -4   0 2870.75   28.72
  -3   4   0 2872.28   28.87
   3  -4   0 2891.60   29.15
  -3   4   0 2896.69   28.37
   3  -4   0 2906.48   28.43
  -3  -4  -1 1024.62   11.30
  -3  -4  -1 1029.97   11.38
   3   4   1 1014.47   11.21
  -3   4  -1 1050.06   11.37
  -3   4  -1 1029.36   10.73
   3  -4   1 1019.79   10.74
  -3  -4  -2 1478.43   15.49
   3   4   2 1458.69   15.48
  -3  -4  -2 1450.27   15.66
  -3   4  -2 1509.33   15.56
  -3   4  -2 1460.86   14.77
   3  -4   2 1469.82   14.72
   3  -4   3   14.02    0.46
  -3  -4  -3   14.00    0.76
   3   4   3   15.80    0.81
  -3   4  -3   15.47    0.78
   3  -4   3   15.45    0.84
  -3   4  -3   14.50    0.48
   3   4   3   14.22    0.85
  -3   4  -3   14.01    0.33
  -3   4  -4  388.54    4.23
   3   4   4  389.01    5.13
   3  -4   4  376.92    4.11
   3  -4   4  385.81    4.24
  -3   4  -4  390.87    5.01
   3  -4   4  379.09    5.25
  -3   4  -4  391.24    4.12
  -3  -4  -4  389.39    5.16
   3   4   4  367.86    5.14
   3  -4   5   74.69    1.41
   3   4   5   70.78    1.76
  -3   4  -5   73.36    1.48
  -3   4  -5   72.74    1.35
  -3   4  -5   76.45    1.70
   3  -4   5   73.12    1.78
   3   4   5   70.44    1.75
   3   4   5   72.46    1.85
  -3   4  -5   72.62    0.98
  -3  -4  -5   73.19    1.81
   3  -4   6  270.47    3.66
   3   4   6  261.69    3.97
  -3   4  -6  271.04    3.38
  -3   4  -6  263.36    3.72
  -3   4  -6  263.12    3.53
   3  -4   6  263.87    3.91
   3   4   6  253.46    3.95
   3   4   6  255.79    4.10
  -3  -4  -6  262.92    4.04
   3  -4   7  429.88    5.57
  -3   4  -7  424.10    5.33
  -3   4  -7  438.75    4.77
   3   4   7  443.58    5.76
  -3   4  -7  427.97    5.41
   3  -4   7  431.95    5.50
   3   4   7  433.48    5.96
   3   4   7  420.31    5.69
  -3  -4  -7  436.82    5.89
   3  -4   8  754.83    9.05
  -3   4  -8  779.77    8.43
   3   4   8  750.80    8.96
   3   4   8  723.22    9.94
  -3   4  -8  757.10    8.83
   3  -4   8  762.59    8.54
   3   4   8  745.09    8.92
   3   4   8  772.21    9.32
  -3  -4  -8  773.35    9.29
   3  -4   9  195.17    3.54
   3   4   9  194.00    3.34
  -3   4  -9  191.31    2.69
  -3  -4  -9  193.54    3.58
   3  -4   9  194.78    2.75
   3   4   9  186.40    3.19
   3   4   9  184.65    3.51
   3   4   9  188.46    4.08
  -3   4  -9  190.50    3.33
   3  -4  10   13.40    1.05
   3   4  10   16.04    0.98
   3   4  10   17.88    1.43
  -3   4 -10   14.95    1.01
   3   4  10   16.37    0.88
   3   4  10   14.95    1.06
  -3  -4 -10   13.88    1.07
  -3  -4 -11    0.97    0.74
   3   4  11    1.39    0.49
  -3   4 -11    0.29    0.68
   3   4  11    0.15    0.97
   3   4  11    0.69    0.49
  -3   4 -12   51.09    1.87
   3   4  12   51.76    2.35
   3   4  12   51.92    1.67
   3   4  12   50.05    1.17
   3  -4  12   51.87    2.03
   3   4  12   49.51    1.17
  -3  -4 -12   50.15    1.87
   3   4  13   19.72    1.13
   3  -4  13   20.65    1.49
   3   4  13   19.38    1.71
  -3  -4 -13   19.73    1.30
   3  -5 -14  172.54    4.47
  -3  -5  13  100.11    3.37
   3  -5 -13   91.92    3.23
  -3   5  13  100.40    3.53
   3  -5 -12  184.01    4.47
  -3  -5  12  191.21    4.56
  -3   5  12  193.14    3.29
   3  -5 -12  192.86    3.36
  -3   5  12  186.89    4.71
   3  -5 -11  375.67    6.77
   3   5 -11  388.16    4.91
  -3   5  11  391.54    5.44
  -3  -5  11  396.40    6.82
   3   5 -11  395.10    6.09
   3  -5 -11  396.75    5.64
  -3   5  11  385.98    6.95
   3  -5 -10   63.51    2.45
   3   5 -10   67.47    1.65
  -3   5  10   66.38    1.83
   3   5 -10   68.68    2.44
  -3   5  10   65.78    2.56
   3  -5 -10   63.59    1.94
   3   5 -10   67.80    1.66
  -3  -5  10   63.28    2.40
   3   5 -10   64.41    2.11
   3  -5  -9  321.35    5.55
   3  -5  -9  324.75    5.75
  -3  -5   9  324.04    5.67
   3   5  -9  319.87    5.14
  -3   5   9  316.30    4.74
   3  -5  -9  315.75    5.02
   3   5  -9  322.57    4.55
  -3   5   9  324.11    5.74
   3   5  -9  324.87    5.65
   3  -5  -8   78.30    2.36
   3  -5  -8   79.73    2.53
   3   5  -8   79.46    1.63
   3   5  -8   79.47    2.22
  -3  -5   8   77.50    2.44
  -3   5   8   78.21    2.00
   3   5  -8   79.93    1.91
   3  -5  -8   77.36    2.19
   3   5  -8   78.78    2.46
  -3   5   8   76.05    2.43
   3   5  -7  297.76    5.18
  -3   5   7  302.88    5.07
  -3  -5   7  304.29    4.03
   3   5  -7  306.66    4.12
  -3  -5   7  294.22    5.08
   3   5  -7  306.91    4.78
   3  -5  -7  296.88    4.95
  -3   5   7  299.29    4.58
   3   5  -7  301.40    4.39
   3  -5  -7  302.07    4.90
   3  -5  -7  303.04    5.25
   3   5  -6   61.83    2.01
  -3   5   6   60.94    1.93
   3   5  -6   63.48    1.53
  -3  -5   6   60.89    1.46
   3   5  -6   60.68    1.81
   3  -5  -6   62.54    1.90
  -3   5   6   63.16    1.77
   3  -5  -6   61.61    1.94
   3   5  -6   62.79    1.67
  -3   5   6   62.68    1.95
   3  -5  -6   63.37    2.08
  -3   5   5  581.29    7.39
   3   5  -5  566.06    7.66
  -3  -5   5  572.06    6.78
   3   5  -5  569.17    6.82
   3   5  -5  575.05    7.31
   3  -5  -5  559.51    7.27
  -3   5   5  575.71    7.27
   3  -5  -5  566.75    7.63
  -3   5   5  573.40    7.51
   3  -5  -5  552.06    7.69
   3   5  -4  812.40    9.21
  -3  -5   4  808.07    9.19
   3   5  -4  813.00    9.57
   3  -5  -4  815.10    9.43
  -3   5   4  813.87    9.46
   3  -5  -4  820.75   10.03
  -3   5   4  793.60    9.60
  -3   5   4  822.31    9.75
   3   5  -4  818.36    9.92
   3   5  -3  247.30    4.12
   3   5  -3  249.92    3.88
  -3   5   3  249.83    3.67
   3  -5  -3  248.58    3.64
   3  -5  -3  246.34    4.25
  -3   5   3  254.61    3.98
   3   5  -3  252.83    3.69
  -3  -5   3  255.67    3.74
   3   5  -2  509.56    6.34
   3   5  -2  522.57    6.63
  -3  -5   2  510.70    6.64
   3  -5  -2  517.25    5.94
  -3   5   2  507.51    5.95
  -3   5   2  505.26    6.57
  -3   5   2  498.42    6.35
   3   5  -2  505.60    6.21
   3   5  -1   84.20    1.85
  -3  -5   1   86.69    2.07
   3   5  -1   85.94    1.93
  -3   5   1   84.72    1.54
   3  -5  -1   83.59    2.22
  -3   5   1   90.20    2.10
  -3   5   1   86.69    1.89
   3  -5  -1   87.08    1.93
  -3  -5   0  464.10    6.16
   3   5   0  471.19    5.98
  -3  -5   0  473.01    6.20
  -3   5   0  476.66    5.19
   3  -5   0  469.79    6.53
  -3   5   0  475.52    6.23
  -3   5   0  474.64    5.82
   3   5   0  479.39    6.04
   3  -5   0  467.11    5.84
   3   5   1   47.48    1.41
  -3  -5  -1   47.13    1.47
  -3   5  -1   50.47    0.85
  -3   5  -1   47.93    1.48
  -3   5  -1   48.06    1.24
   3  -5   1   47.50    1.22
   3   5   2   77.70    1.86
  -3  -5  -2   79.15    1.91
  -3   5  -2   77.25    1.05
  -3   5  -2   80.54    1.92
   3  -5   2   77.55    1.48
  -3   5  -2   78.10    1.53
  -3   5  -2   78.83    1.08
  -3   5  -3   50.24    1.11
   3  -5   3   51.37    1.08
  -3  -5  -3   47.41    1.48
   3  -5   3   49.17    1.63
  -3   5  -3   51.12    1.50
   3   5   3   48.79    1.54
  -3   5  -3   50.54    0.82
   3  -5   4 1112.45   11.51
   3  -5   4 1129.97   12.79
  -3   5  -4 1115.12   12.43
  -3   5  -4 1129.33   11.52
  -3  -5  -4 1163.85   12.66
   3   5   4 1138.61   12.71
   3   5   4 1133.08   12.76
   3   5   4 1149.63   13.13
  -3   5  -4 1126.42   11.31
  -3   5  -5   86.50    1.47
   3   5   5   85.17    2.37
   3   5   5   86.04    2.06
  -3   5  -5   81.00    1.90
   3  -5   5   89.93    2.14
   3   5   5   84.29    2.10
  -3   5  -5   86.59    1.37
   3   5   5   85.10    2.16
  -3  -5  -5   89.53    2.15
  -3   5  -6  467.18    5.48
   3   5   6  465.69    6.20
  -3   5  -6  460.99    5.49
  -3   5  -6  471.24    5.94
   3   5   6  474.82    6.46
  -3   5  -6  461.23    5.00
  -3  -5  -6  480.10    6.37
   3   5   6  464.64    6.33
   3  -5   6  468.07    6.19
   3  -5   6  479.36    5.55
  -3   5  -7   44.52    1.23
  -3   5  -7   45.94    1.02
   3   5   7   41.43    1.46
   3  -5   7   42.75    1.26
  -3   5  -7   45.36    1.34
   3   5   7   42.81    1.51
   3  -5   7   41.57    1.39
  -3  -5  -7   42.08    1.56
  -3   5  -7   41.96    0.78
   3   5   7   44.46    1.64
   3  -5   8  113.00    2.32
  -3   5  -8  115.26    2.16
   3   5   8  118.36    2.52
  -3   5  -8  106.47    1.41
  -3   5  -8  115.08    2.24
   3   5   8  115.73    2.53
   3  -5   8  113.25    2.26
   3   5   8  118.03    2.74
  -3   5  -8  106.80    1.40
  -3  -5  -8  113.10    2.65
   3  -5   9   16.36    1.01
   3   5   9   14.30    0.98
  -3   5  -9   17.45    0.80
  -3   5  -9   16.85    0.95
   3   5   9   16.95    1.17
   3   5   9   15.91    1.01
   3  -5   9   17.43    0.82
  -3  -5  -9   16.59    1.11
   3  -5  10  110.94    2.62
   3   5  10  109.22    2.49
  -3   5 -10  107.09    1.83
   3   5  10  108.45    2.40
  -3  -5 -10  112.72    2.76
   3   5  10  109.19    2.76
   3   5  10  107.12    3.22
  -3   5 -10  109.18    2.47
   3  -5  11  506.49    7.18
   3   5  11  511.22    6.86
  -3   5 -11  513.13    6.96
   3   5  11  500.71    8.16
   3   5  11  516.89    6.55
   3   5  11  510.80    7.29
  -3  -5 -11  513.55    7.29
   3   5  12  181.35    4.51
   3   5  12  183.23    3.46
   3   5  12  179.70    2.95
   3   5  12  177.93    2.92
  -3  -5 -12  183.26    3.79
   3  -5  12  182.57    3.79
   3  -5  13    1.36    0.84
   3   5  13   -0.15    0.72
  -3  -6  13   35.04    2.12
   3  -6 -13   34.46    2.15
   3  -6 -12   69.38    2.78
  -3   6  12   69.06    1.94
  -3  -6  12   72.21    2.78
   3  -6 -12   74.59    2.09
  -3   6  12   69.12    2.90
  -3   6  11    7.56    1.28
   3  -6 -11    8.10    1.30
   3   6 -11    7.58    0.71
  -3   6  11    8.36    0.86
   3  -6 -11    9.22    0.95
  -3  -6  11    8.65    1.22
   3  -6 -10  162.47    4.05
   3   6 -10  154.39    3.39
  -3  -6  10  158.70    3.89
  -3   6  10  158.23    3.14
   3   6 -10  163.87    2.97
   3  -6 -10  159.50    3.38
  -3   6  10  160.49    4.03
   3   6 -10  160.60    3.85
   3  -6  -9  151.16    3.78
   3   6  -9  156.04    3.30
  -3  -6   9  151.06    3.64
   3  -6  -9  154.87    3.65
  -3   6   9  149.82    3.06
   3   6  -9  157.95    2.98
   3  -6  -9  150.82    3.33
   3   6  -9  158.32    3.73
  -3   6   9  151.09    3.72
  -3   6   8  287.80    5.24
   3   6  -8  297.03    5.32
   3   6  -8  297.53    4.06
  -3  -6   8  293.55    5.23
   3   6  -8  292.02    4.82
   3  -6  -8  298.01    5.17
  -3   6   8  298.99    4.70
   3  -6  -8  299.12    5.04
   3   6  -8  305.94    4.60
   3  -6  -8  291.33    5.47
   3   6  -7    9.58    1.04
  -3   6   7   10.99    1.05
   3   6  -7   10.38    0.72
   3   6  -7   10.55    0.95
   3  -6  -7    8.99    0.94
  -3   6   7   11.10    0.89
   3  -6  -7   11.72    1.05
  -3   6   7   11.11    1.03
   3   6  -7   11.33    0.88
   3  -6  -7   10.01    1.11
   3   6  -6   32.00    1.54
  -3   6   6   34.20    1.50
   3  -6  -6   31.53    1.40
   3   6  -6   30.72    1.13
   3   6  -6   32.10    1.35
  -3   6   6   32.99    1.39
  -3   6   6   31.68    1.49
   3   6  -6   32.24    1.32
   3  -6  -6   31.56    1.52
   3  -6  -6   31.01    1.57
  -3   6   5    1.72    0.58
   3  -6  -5    1.82    0.58
   3  -6  -5    1.90    0.69
   3   6  -5    2.44    0.50
   3   6  -5    3.57    0.63
  -3   6   5    2.60    0.62
   3   6  -5    3.04    0.59
   3  -6  -5    2.13    0.68
  -3   6   5    2.15    0.65
   3   6  -5    2.40    0.67
   3   6  -4   34.87    1.22
   3   6  -4   35.30    1.34
   3  -6  -4   36.85    1.32
  -3   6   4   34.18    1.29
  -3   6   4   31.17    1.37
   3  -6  -4   34.73    1.56
   3   6  -4   36.19    1.38
  -3   6   4   33.05    1.40
   3   6  -4   34.89    1.49
   3   6  -3  274.01    4.19
   3   6  -3  271.55    4.45
  -3   6   3  272.41    4.01
   3  -6  -3  270.48    3.94
   3  -6  -3  263.94    4.71
  -3   6   3  272.33    4.33
   3   6  -3  270.75    4.31
   3   6  -3  265.61    3.96
   3   6  -2 1340.38   14.43
   3   6  -2 1352.60   14.65
  -3  -6   2 1327.99   15.07
  -3   6   2 1356.24   14.19
   3  -6  -2 1366.23   15.44
  -3   6   2 1337.07   15.00
  -3   6   2 1342.02   14.75
   3   6  -2 1344.92   14.89
   3  -6  -2 1317.38   14.83
   3   6  -1  177.51    3.06
  -3  -6   1  181.71    3.38
  -3   6   1  179.23    2.70
   3  -6  -1  185.65    3.65
  -3   6   1  182.77    3.40
  -3   6   1  179.46    3.13
   3   6  -1  175.91    3.31
   3   6  -1  180.26    3.16
   3  -6  -1  173.67    3.13
   3   6   0   68.88    1.77
  -3  -6   0   69.37    1.92
  -3   6   0   66.17    1.32
   3  -6   0   74.36    2.17
  -3   6   0   70.28    1.96
  -3   6   0   67.96    1.70
   3   6   0   65.71    1.91
   3  -6   0   66.54    1.70
   3   6   0   68.33    1.81
   3   6   1 1859.85   19.70
  -3  -6  -1 1883.27   19.93
  -3   6  -1 1868.41   18.55
  -3   6  -1 1872.28   19.99
   3   6   1 1868.33   20.08
  -3   6  -1 1876.35   19.35
   3  -6   1 1907.56   19.32
   3   6   1 1869.34   19.86
   3   6   2   43.30    1.46
  -3  -6  -2   45.54    1.54
  -3   6  -2   49.38    0.91
   3  -6   2   42.84    1.67
  -3   6  -2   45.60    1.54
   3  -6   2   45.28    1.20
  -3   6  -2   44.82    1.25
  -3   6  -2   45.72    0.92
  -3   6  -3   18.04    0.76
   3  -6   3   18.73    0.74
  -3  -6  -3   19.49    1.08
   3   6   3   19.18    1.14
  -3   6  -3   17.32    0.99
   3  -6   3   18.29    1.11
   3   6   3   19.22    1.10
  -3   6  -3   18.60    0.57
  -3  -6  -4  227.11    3.90
  -3   6  -4  225.10    3.10
   3   6   4  224.94    3.93
   3  -6   4  226.28    3.09
   3   6   4  217.61    4.12
  -3   6  -4  220.09    3.71
   3   6   4  220.21    3.98
   3  -6   4  227.16    4.01
  -3   6  -4  220.09    2.78
  -3   6  -5  167.02    2.37
   3   6   5  171.46    3.64
   3  -6   5  167.05    2.48
  -3   6  -5  171.33    3.12
   3   6   5  168.65    3.20
   3   6   5  169.79    3.36
   3  -6   5  175.97    3.38
  -3  -6  -5  175.82    3.38
  -3   6  -5  171.84    2.47
   3   6   5  176.80    3.41
   3   6   6   16.63    1.26
  -3   6  -6   16.30    0.69
   3   6   6   18.96    1.08
  -3   6  -6   16.28    0.92
   3   6   6   14.41    1.05
   3  -6   6   18.02    1.06
   3   6   6   18.40    1.16
  -3  -6  -6   17.54    1.13
  -3   6  -6   17.19    0.64
  -3   6  -7  180.54    2.80
   3   6   7  183.13    3.40
  -3   6  -7  186.81    2.67
  -3   6  -7  176.88    3.12
   3   6   7  180.61    3.53
   3  -6   7  180.73    3.35
  -3   6  -7  181.32    2.41
  -3  -6  -7  179.08    3.55
   3   6   7  181.13    3.65
  -3   6  -8  102.50    2.05
   3   6   8   99.73    2.42
  -3   6  -8   99.19    1.53
   3  -6   8   97.62    2.08
  -3   6  -8  103.29    2.16
   3   6   8   99.99    2.52
   3  -6   8  100.37    2.26
   3   6   8   94.88    2.60
  -3   6  -8   92.35    1.49
  -3  -6  -8   99.73    2.59
  -3   6  -9  101.01    2.21
   3   6   9  104.81    2.52
  -3   6  -9  104.38    2.12
   3  -6   9  110.16    2.34
   3  -6   9  106.18    2.20
  -3   6  -9   95.28    1.40
   3   6   9  102.58    2.75
   3   6   9  101.46    2.52
  -3  -6  -9  102.10    2.72
   3   6  10  651.40    8.43
   3  -6  10  660.14    8.26
  -3   6 -10  664.31    8.14
   3   6  10  654.78    8.40
   3   6  10  649.69    8.86
  -3  -6 -10  655.69    8.88
   3  -6  11   27.83    1.38
   3   6  11   24.70    1.80
   3   6  11   27.54    1.29
   3   6  11   27.06    1.38
  -3  -6 -11   24.25    1.50
   3  -6  12  116.57    2.86
   3   6  12  117.50    2.76
  -3  -6 -12  115.08    3.06
   3   6  12  115.85    3.64
  -3  -7  13  219.87    5.08
   3  -7 -13  227.33    5.31
  -3   7  12   23.50    1.31
   3  -7 -12   24.13    1.87
  -3   7  12   22.88    1.84
  -3  -7  12   23.64    1.77
  -3   7  11   11.42    1.42
   3  -7 -11   10.33    1.38
  -3   7  11   11.13    1.02
   3  -7 -11   10.50    1.07
  -3  -7  11   10.26    1.29
   3  -7 -10   36.77    2.08
   3   7 -10   36.88    1.68
  -3   7  10   35.97    1.55
   3   7 -10   38.84    1.49
   3  -7 -10   37.78    1.73
   3   7 -10   38.69    1.99
  -3   7  10   38.82    2.09
   3  -7  -9  135.34    3.41
   3  -7  -9  131.95    3.60
   3   7  -9  127.51    2.29
   3   7  -9  136.87    3.07
  -3   7   9  132.77    3.00
   3  -7  -9  128.99    3.22
   3   7  -9  130.39    2.84
   3   7  -9  134.48    3.46
  -3   7   9  130.58    3.48
  -3   7   8   -0.13    0.79
   3  -7  -8    1.16    0.75
   3  -7  -8   -0.40    0.85
   3   7  -8    0.13    0.47
   3   7  -8    1.01    0.67
  -3   7   8    0.72    0.71
   3   7  -8    0.64    0.63
   3  -7  -8   -0.04    0.71
   3   7  -8    0.50    0.84
   3   7  -7  162.20    3.69
   3   7  -7  162.36    2.87
   3   7  -7  156.79    3.26
   3  -7  -7  157.37    3.48
  -3   7   7  165.54    3.60
  -3   7   7  164.57    3.38
   3   7  -7  165.00    3.31
  -3   7   7  161.00    3.61
   3  -7  -7  162.35    3.67
   3  -7  -7  162.03    3.82
   3   7  -6  310.65    5.40
   3   7  -6  309.15    4.53
   3   7  -6  315.92    4.93
  -3   7   6  314.83    5.18
   3  -7  -6  318.48    5.09
  -3   7   6  314.72    5.12
   3  -7  -6  321.71    5.50
   3   7  -6  324.04    5.08
  -3   7   6  318.75    5.36
   3  -7  -6  321.81    5.56
   3   7  -5  133.90    2.60
   3   7  -5  133.93    2.85
   3  -7  -5  132.53    2.83
  -3   7   5  130.71    2.87
  -3   7   5  131.53    3.02
   3   7  -5  132.33    2.96
  -3   7   5  135.62    3.11
   3  -7  -5  139.12    3.32
   3   7  -5  135.47    3.16
   3   7  -4   21.46    1.12
   3   7  -4   21.48    1.05
  -3   7   4   20.67    1.25
  -3   7   4   21.03    1.22
   3   7  -4   21.64    1.22
   3  -7  -4   22.31    1.37
  -3   7   4   22.54    1.10
   3  -7  -4   24.71    1.14
   3   7  -3  355.01    5.26
   3   7  -3  371.61    5.60
   3   7  -3  363.15    5.07
   3  -7  -3  357.79    5.94
  -3   7   3  368.41    5.49
   3   7  -3  363.91    5.57
  -3   7   3  358.65    5.07
  -3   7   2   40.92    1.28
   3   7  -2   39.70    1.38
  -3   7   2   36.58    1.54
   3  -7  -2   39.64    1.74
  -3   7   2   40.20    1.50
   3   7  -2   38.65    1.57
   3  -7  -2   39.34    1.52
   3   7  -2   39.79    1.48
  -3   7   1   21.47    0.88
  -3  -7   1   23.25    1.25
   3   7  -1   23.12    1.09
  -3   7   1   22.28    1.23
   3   7  -1   20.68    1.21
  -3   7   1   21.65    1.09
   3  -7  -1   19.52    1.28
   3  -7  -1   21.20    1.12
   3   7  -1   22.92    1.15
  -3   7   0    7.31    0.54
  -3  -7   0    8.10    0.86
   3   7   0    7.99    0.74
  -3   7   0    6.54    0.81
   3   7   0    5.83    0.81
  -3   7   0    7.27    0.70
   3  -7   0    6.64    0.90
   3   7   0    8.30    0.81
  -3   7  -1   12.52    0.58
  -3  -7  -1   13.57    0.97
   3   7   1   11.97    0.90
  -3   7  -1   11.57    0.95
   3   7   1   12.42    1.00
   3  -7   1   12.81    0.80
  -3   7  -1   12.06    0.80
   3   7   1   14.24    0.99
  -3   7  -2  412.73    4.73
   3   7   2  419.44    5.85
  -3  -7  -2  416.52    6.01
  -3   7  -2  406.34    4.78
  -3   7  -2  411.48    5.99
   3  -7   2  410.00    6.32
  -3   7  -2  409.51    5.41
   3  -7   2  420.05    5.33
   3   7   3    1.54    0.66
  -3   7  -3    3.30    0.51
   3   7   3    2.89    0.66
   3  -7   3    2.41    0.47
  -3   7  -3    2.62    0.66
   3   7   3    2.94    0.73
   3  -7   3    2.53    0.71
  -3   7  -3    3.18    0.37
  -3   7  -4  493.24    6.00
   3   7   4  482.74    6.93
  -3  -7  -4  502.28    6.92
   3  -7   4  488.33    5.97
   3   7   4  500.32    7.25
  -3   7  -4  497.54    6.74
   3  -7   4  486.45    7.06
   3   7   4  496.47    7.09
  -3   7  -4  493.60    5.57
  -3   7  -5  207.87    2.87
   3   7   5  213.79    4.29
   3   7   5  213.98    3.84
   3  -7   5  210.03    3.12
  -3   7  -5  207.91    3.72
   3  -7   5  217.65    4.06
   3   7   5  213.33    4.07
  -3  -7  -5  220.77    4.02
  -3   7  -5  212.01    3.10
   3   7   5  214.85    4.05
   3   7   6    3.43    0.82
  -3   7  -6    4.13    0.47
   3   7   6    2.31    0.70
  -3  -7  -6    2.02    0.74
  -3   7  -6    3.13    0.62
   3   7   6    2.61    0.74
   3  -7   6    3.47    0.71
  -3   7  -6    2.53    0.42
   3   7   6    3.07    0.87
  -3   7  -7    7.65    0.53
   3   7   7    5.87    0.93
   3   7   7    7.59    0.91
  -3  -7  -7    5.94    0.92
  -3   7  -7    7.91    0.78
   3   7   7    6.20    0.91
   3   7   7    6.05    1.09
  -3   7  -7    5.67    0.55
  -3   7  -8  211.18    3.23
   3   7   8  201.27    4.54
  -3   7  -8  203.00    2.84
   3   7   8  217.93    3.95
  -3   7  -8  210.82    3.55
   3   7   8  209.38    4.07
   3  -7   8  211.08    3.75
   3   7   8  209.29    4.19
  -3  -7  -8  212.29    4.18
  -3   7  -8  207.92    2.79
   3   7   9   19.77    1.26
  -3   7  -9   21.33    1.07
  -3   7  -9   22.69    1.04
   3  -7   9   23.12    1.14
   3   7   9   22.56    1.34
  -3  -7  -9   21.73    1.45
   3   7  10   66.92    2.14
   3   7  10   68.23    2.15
  -3  -7 -10   65.38    2.34
   3   7  11   76.74    2.24
  -3  -7 -11   75.00    2.52
   3  -7  11   75.63    2.11
  -3  -7 -12   69.38    2.48
   3  -7  12   70.94    2.15
   3  -8 -12    4.23    1.28
   3  -8 -11   47.16    2.39
   3  -8 -11   46.70    1.97
  -3   8  11   47.61    2.43
   3  -8 -10  353.94    6.64
   3  -8 -10  354.96    5.98
  -3   8  10  354.92    6.54
  -3   8  10  348.95    5.64
   3  -8  -9   94.45    3.13
  -3   8   9   92.21    2.59
   3  -8  -9   97.64    2.91
   3   8  -9   96.17    2.56
   3   8  -9   91.56    2.95
  -3   8   9   96.82    3.07
   3   8  -8   59.64    2.32
  -3   8   8   59.03    2.31
   3  -8  -8   60.05    2.20
   3   8  -8   63.15    1.70
   3   8  -8   57.98    1.96
  -3   8   8   62.77    2.15
   3   8  -8   61.81    2.04
   3  -8  -8   60.08    2.29
   3  -8  -8   64.07    2.54
  -3   8   7    4.50    0.92
   3  -8  -7    5.92    0.94
   3  -8  -7    5.52    1.06
   3   8  -7    5.74    0.71
   3   8  -7    5.13    0.85
  -3   8   7    5.63    0.95
   3   8  -7    5.69    0.82
   3  -8  -7    6.01    1.02
   3   8  -7    4.64    1.03
   3   8  -6  196.87    4.12
   3   8  -6  194.01    3.37
   3   8  -6  193.95    3.67
   3  -8  -6  194.43    3.78
  -3   8   6  182.67    3.79
  -3   8   6  190.04    3.90
   3  -8  -6  190.80    4.23
   3   8  -6  196.49    3.89
  -3   8   6  189.59    4.03
   3  -8  -6  179.78    4.11
   3   8  -5 1040.86   11.93
  -3  -8   5 1039.58   12.89
   3   8  -5 1051.53   12.32
  -3   8   5 1037.35   12.41
  -3   8   5 1069.96   12.80
  -3   8   5 1062.50   12.80
   3  -8  -5 1061.38   13.28
   3   8  -5 1033.54   12.67
   3   8  -5 1080.40   12.98
  -3   8   4  840.63   10.16
  -3  -8   4  841.01   10.79
   3   8  -4  848.36   10.69
   3   8  -4  844.80    9.90
  -3   8   4  839.01   10.68
   3  -8  -4  832.82   11.17
   3   8  -4  832.77   10.60
  -3   8   4  841.39   10.61
   3   8  -4  839.34   10.26
  -3   8   3   93.43    2.22
   3   8  -3   94.12    2.24
   3   8  -3   96.20    2.58
   3  -8  -3   91.67    2.82
   3   8  -3   97.26    2.63
  -3   8   3   92.00    2.49
   3   8  -3   93.03    2.39
   3  -8  -3   89.20    2.53
  -3   8   2    3.97    0.72
   3  -8  -2    2.84    0.71
   3   8  -2    2.40    0.64
  -3   8   2    3.26    0.81
  -3   8   2    3.35    0.58
   3   8  -2    3.56    0.78
   3  -8  -2    4.56    0.93
   3   8  -2    3.41    0.74
   3   8  -1  179.44    3.35
  -3  -8   1  174.28    3.69
  -3   8   1  180.89    2.99
  -3   8   1  183.97    3.75
   3   8  -1  184.18    3.81
   3  -8  -1  179.51    4.00
  -3   8   1  180.46    3.46
   3   8  -1  178.53    3.49
   3  -8  -1  177.99    3.45
   3   8   0  139.29    2.88
  -3  -8   0  136.05    3.15
  -3   8   0  132.63    2.37
  -3   8   0  144.67    3.21
   3  -8   0  128.91    3.33
   3   8   0  138.98    3.24
  -3   8   0  133.69    2.83
   3   8   0  137.86    3.01
   3  -8   0  138.81    2.84
   3   8   1  159.54    3.17
  -3  -8  -1  159.15    3.38
  -3   8  -1  158.00    2.48
  -3   8  -1  156.91    3.39
   3   8   1  152.85    3.47
  -3   8  -1  152.73    2.97
   3   8   1  152.59    3.25
   3  -8   1  155.78    2.94
   3   8   2  229.14    4.03
  -3  -8  -2  221.64    4.16
  -3   8  -2  221.65    3.11
   3  -8   2  224.54    3.61
  -3   8  -2  228.67    3.10
  -3   8  -2  230.02    4.20
   3  -8   2  230.57    4.53
  -3   8  -2  226.27    3.70
   3   8   2  226.87    4.19
  -3   8  -3  173.04    2.62
   3   8   3  180.27    3.51
   3  -8   3  171.72    3.01
  -3  -8  -3  177.84    3.63
  -3   8  -3  186.90    3.14
  -3   8  -3  182.00    3.61
   3  -8   3  180.83    3.89
   3   8   3  177.31    3.83
  -3   8  -3  177.42    2.52
   3   8   3  177.15    3.78
   3   8   4    0.96    0.69
   3  -8   4    0.11    0.44
  -3  -8  -4    1.20    0.69
  -3   8  -4    1.59    0.49
  -3   8  -4   -0.17    0.61
   3  -8   4    0.21    0.70
   3   8   4    1.62    0.77
  -3   8  -4    0.83    0.37
   3   8   5  283.13    5.27
  -3   8  -5  283.81    4.04
   3   8   5  284.95    5.01
   3  -8   5  284.91    4.08
  -3  -8  -5  270.82    4.89
  -3   8  -5  275.80    4.67
   3   8   5  284.31    5.09
   3  -8   5  287.81    5.05
  -3   8  -5  280.02    3.70
   3   8   6    4.09    0.98
  -3   8  -6    5.87    0.58
   3   8   6    5.14    0.87
  -3  -8  -6    4.97    0.90
  -3   8  -6    5.30    0.82
   3  -8   6    5.60    0.90
   3   8   6    4.35    0.88
  -3   8  -6    6.58    0.56
   3   8   7  171.31    3.57
  -3   8  -7  169.86    3.36
   3   8   7  172.54    4.16
  -3   8  -7  171.79    2.71
   3   8   7  177.16    3.82
   3  -8   7  168.50    3.56
  -3   8  -7  175.94    2.73
  -3  -8  -7  169.06    3.77
   3   8   8  678.36    8.93
  -3   8  -8  679.82    7.83
   3   8   8  680.12    9.94
  -3   8  -8  669.95    8.49
   3  -8   8  686.90    8.78
   3   8   8  661.70    9.17
  -3  -8  -8  663.70    9.26
   3   8   9    3.70    1.06
   3  -8   9    5.01    0.79
   3   8   9    5.37    1.00
  -3  -8  -9    5.07    1.07
   3   8  10   36.06    1.70
   3   8  10   32.93    2.07
  -3  -8 -10   32.24    1.78
  -3  -8 -11  122.40    3.36
   3  -9 -11   94.00    3.36
   3  -9 -11   95.04    2.86
   3  -9 -10   21.73    1.75
   3  -9 -10   21.61    1.52
  -3   9  10   21.97    1.72
   3   9  -9    2.35    0.84
   3  -9  -9    2.87    0.96
  -3   9   9    2.42    1.00
   3  -9  -9    2.02    1.10
   3   9  -8   88.62    2.88
  -3   9   8   87.38    2.81
   3   9  -8   87.39    2.12
   3  -9  -8   84.85    2.82
   3   9  -8   90.62    2.62
   3  -9  -8   88.82    3.02
   3   9  -7   68.43    2.47
  -3   9   7   67.75    2.38
   3   9  -7   69.16    1.92
   3  -9  -7   65.52    2.51
   3   9  -7   69.07    2.32
   3  -9  -7   67.97    2.61
   3   9  -6   10.04    1.15
   3   9  -6   10.31    0.91
  -3   9   6    8.56    1.03
   3  -9  -6   10.05    1.26
   3   9  -6    8.88    1.05
   3   9  -6    9.98    1.05
   3   9  -5   24.61    1.52
  -3   9   5   22.95    1.38
  -3  -9   5   26.29    1.59
   3   9  -5   26.19    1.29
  -3   9   5   23.60    1.48
   3   9  -5   25.12    1.50
   3  -9  -5   24.01    1.65
   3   9  -5   24.30    1.39
  -3   9   4  611.75    8.13
   3   9  -4  622.72    8.63
  -3  -9   4  616.72    8.76
   3   9  -4  620.14    7.91
  -3   9   4  610.25    8.67
   3  -9  -4  622.91    9.17
   3   9  -4  616.37    8.68
  -3   9   4  610.76    8.54
   3  -9  -4  622.93    8.71
   3   9  -4  606.84    8.26
  -3   9   3  466.34    6.45
   3   9  -3  464.77    6.98
  -3  -9   3  475.94    7.22
   3   9  -3  460.13    6.44
   3  -9  -3  475.14    7.63
   3   9  -3  472.11    7.19
  -3   9   3  475.23    6.98
   3  -9  -3  476.38    7.06
   3   9  -3  459.95    6.75
  -3   9   2  681.63    8.37
  -3   9   2  673.66    9.28
   3   9  -2  676.00    8.60
   3  -9  -2  666.25    9.72
   3   9  -2  693.95    9.40
  -3   9   2  688.90    9.00
   3   9  -2  679.73    8.88
   3  -9  -2  674.13    9.00
  -3   9   1   31.23    1.21
   3   9  -1   28.79    1.37
  -3   9   1   30.25    1.60
   3   9  -1   30.14    1.63
  -3   9   1   27.47    1.41
   3  -9  -1   31.24    1.78
   3   9  -1   31.88    1.52
   3  -9  -1   27.40    1.42
  -3   9   0   11.07    0.76
  -3  -9   0   12.63    1.15
   3   9   0   12.36    1.00
  -3   9   0   11.55    1.12
   3   9   0   11.56    1.16
   3   9   0   12.29    1.08
   3  -9   0   10.78    0.96
  -3   9  -1   77.73    1.73
  -3  -9  -1   78.92    2.45
   3   9   1   78.29    2.26
  -3   9  -1   75.77    2.41
   3   9   1   77.55    2.57
   3   9   1   79.04    2.39
   3  -9   1   80.55    2.13
  -3   9  -1   79.77    2.15
   3   9   2   32.14    1.68
  -3   9  -2   35.26    1.09
   3   9   2   34.91    1.58
  -3  -9  -2   41.59    1.79
  -3   9  -2   37.87    1.13
   3  -9   2   37.83    1.41
  -3   9  -2   34.67    1.66
   3  -9   2   37.06    1.85
  -3   9  -2   33.60    1.41
   3   9   2   35.31    1.67
  -3   9  -3    5.10    0.52
   3   9   3    6.33    0.97
  -3   9  -3    4.97    0.72
   3   9   3    4.47    0.86
  -3  -9  -3    4.75    0.91
   3  -9   3    4.50    0.66
  -3   9  -3    4.67    0.92
   3   9   3    5.15    0.96
   3  -9   3    3.71    0.91
  -3   9  -3    5.60    0.54
  -3   9  -4  105.93    2.36
   3  -9   4  107.10    2.36
  -3  -9  -4  107.96    2.95
   3   9   4  101.23    3.04
  -3   9  -4  111.06    2.83
   3  -9   4  104.70    3.03
   3   9   4  112.01    3.09
  -3   9  -4  107.69    2.01
  -3   9  -5   27.56    1.17
  -3  -9  -5   29.39    1.60
   3   9   5   27.83    1.72
  -3   9  -5   29.32    1.51
   3  -9   5   31.72    1.66
   3   9   5   26.98    1.62
  -3   9  -5   28.82    1.00
  -3  -9  -6    0.70    0.81
   3  -9   6    1.17    0.56
   3   9   6    0.58    0.89
  -3   9  -6    0.37    0.44
  -3   9  -6    0.07    0.74
   3  -9   6    0.60    0.78
  -3   9  -6    0.54    0.51
  -3   9  -7    4.18    0.83
   3   9   7    3.54    1.09
   3  -9   7    5.41    0.92
  -3  -9  -7    3.99    1.02
   3   9   8   76.80    2.90
   3  -9   8   71.45    2.28
  -3  -9  -8   77.16    2.61
  -3   9  -8   74.32    2.20
  -3  -9  -9   68.39    2.56
   3   9   9   70.57    2.87
  -3  -9 -10   13.78    1.47
   3 -10 -10   12.01    1.29
   3 -10 -10   10.84    1.56
  -3  10  10   10.79    1.49
   3 -10  -9  144.84    4.10
   3 -10  -9  142.56    3.80
  -3  10   9  139.35    3.85
   3 -10  -8   37.92    2.05
   3 -10  -8   33.30    2.06
  -3  10   8   31.49    1.88
   3 -10  -7   95.58    3.16
   3  10  -7   99.07    2.42
  -3  10   7   96.30    2.90
   3  10  -6   88.98    2.31
  -3  10   6   84.47    2.62
   3 -10  -6   90.60    3.05
   3  10  -6   87.43    2.79
   3  10  -5  314.83    4.96
  -3  10   5  311.24    5.29
  -3 -10   5  308.22    5.74
   3 -10  -5  309.97    6.04
   3  10  -5  306.10    5.58
   3 -10  -4    1.41    0.91
   3  10  -4    1.47    0.67
  -3 -10   4    1.20    0.91
   3  10  -4    0.84    0.82
   3 -10  -4    0.85    0.99
  -3  10   4    0.93    0.73
   3  10  -3  187.02    3.59
  -3 -10   3  184.94    4.20
   3  10  -3  186.06    4.00
  -3  10   3  183.50    3.56
   3 -10  -3  183.69    4.46
   3 -10  -3  177.09    3.95
   3  10  -2  366.80    5.66
   3  10  -2  369.28    6.03
   3 -10  -2  368.56    6.69
  -3  10   2  366.71    5.99
   3 -10  -2  372.59    6.02
  -3  10   2  370.67    5.45
   3  10  -1  263.14    4.56
   3 -10  -1  263.08    5.43
  -3  10   1  261.12    4.72
  -3  10   1  265.12    4.17
   3 -10  -1  259.56    4.67
  -3  10   0   43.46    1.43
   3  10   0   46.63    1.81
   3 -10   0   45.04    1.74
  -3  10   0   45.59    1.81
  -3  10  -1  365.10    4.96
  -3 -10  -1  368.47    6.21
   3  10   1  372.99    5.83
  -3  10  -1  370.60    5.70
   3 -10   1  369.35    5.61
  -3  10  -2    0.30    0.64
   3  10   2    0.23    0.81
   3 -10   2    0.78    0.62
  -3 -10  -2    0.98    0.86
  -3  10  -2    0.99    0.48
   3 -10   2    0.69    0.95
   3  10   2    0.82    0.81
  -3  10  -2    0.67    0.49
   3  10   3    5.62    1.08
  -3  10  -3    5.25    0.57
  -3  10  -3    4.57    0.78
  -3 -10  -3    4.84    1.01
   3 -10   3    4.10    0.73
   3 -10   3    3.66    0.97
  -3  10  -3    4.51    0.59
  -3  10  -4   65.59    1.49
   3  10   4   60.76    2.46
  -3  10  -4   63.84    1.91
   3 -10   4   62.41    1.91
  -3 -10  -4   66.25    2.39
   3 -10   4   61.92    2.44
  -3  10  -4   64.10    1.59
   3  10   5  749.78   10.77
  -3  10  -5  771.80    9.30
  -3 -10  -5  767.09   10.46
   3 -10   5  772.39    9.37
   3 -10   5  771.29   10.60
  -3  10  -5  765.47    8.67
   3 -10   6  456.14    6.16
  -3 -10  -6  438.00    7.20
   3  10   6  443.12    7.57
   3 -10   6  453.17    7.18
  -3 -10  -7   -0.44    1.00
   3 -10   7    1.46    0.94
   3  10   7    1.30    1.08
   3 -10   8   53.87    2.07
  -3 -10  -8   53.04    2.34
   3  10   8   53.72    2.57
  -3 -10  -9  210.09    4.69
   3 -11  -9  146.47    4.20
   3 -11  -9  144.73    3.98
  -3  11   9  139.85    3.90
   3 -11  -8    2.26    1.08
   3 -11  -8    4.44    1.26
  -3  11   8    2.89    1.11
  -3  11   7    1.46    1.03
   3 -11  -7    0.47    1.07
  -3  11   6   17.44    1.41
   3 -11  -6   19.78    1.70
   3  11  -6   18.00    1.20
   3  11  -5  278.24    4.70
  -3  11   5  275.85    5.00
  -3 -11   5  272.07    5.49
   3 -11  -5  270.27    5.77
   3 -11  -5  266.87    5.39
   3 -11  -4    2.65    1.02
   3  11  -4    1.11    0.79
  -3 -11   4    2.34    1.00
   3  11  -4    3.81    1.00
   3 -11  -4    3.21    1.14
  -3  11   4    3.37    0.86
  -3  11   3   23.52    1.37
   3  11  -3   24.18    1.55
  -3 -11   3   22.57    1.63
   3  11  -3   24.14    1.35
   3 -11  -3   24.52    1.84
   3 -11  -3   24.41    1.60
  -3  11   2  397.77    5.88
   3  11  -2  403.20    6.54
  -3 -11   2  395.48    6.85
   3 -11  -2  396.54    7.24
   3 -11  -2  403.04    6.48
   3  11  -2  399.19    6.13
  -3  11   1  158.25    3.14
   3 -11  -1  157.33    4.21
   3 -11  -1  157.53    3.62
   3  11  -1  159.33    3.49
   3 -11   0  119.02    3.01
  -3  11   0  118.35    3.06
  -3  11   0  122.09    2.58
   3 -11   1    5.30    0.93
  -3 -11  -1    7.03    1.12
  -3  11  -1    6.97    0.98
  -3  11  -1    6.33    0.72
   3 -11   2   14.09    1.10
  -3 -11  -2   12.91    1.35
  -3  11  -2   14.26    0.88
  -3  11  -2   14.36    1.16
   3 -11   2   13.53    1.47
  -3  11  -2   13.89    0.86
   3  11   2   15.99    1.42
  -3 -11  -3   -0.10    0.92
   3 -11   3    0.86    0.72
  -3  11  -3    1.32    0.74
   3 -11   3    1.51    0.99
   3  11   3    0.57    0.89
  -3  11  -3    0.90    0.52
   3 -11   4    0.03    0.70
  -3 -11  -4    1.64    0.94
  -3  11  -4    0.79    0.68
   3 -11   4    1.47    0.98
   3  11   4    0.93    0.90
   3 -11   5    4.51    1.07
  -3 -11  -5    4.40    1.10
   3 -11   5    6.59    0.88
   3  11   5    3.49    1.16
   3 -11   6    1.66    1.02
  -3 -11  -6    1.77    1.04
   3 -11   6    2.33    0.73
   3  11   6    1.85    1.17
   3 -11   7  325.00    5.83
  -3 -11  -7  322.02    6.07
   3  11   7  329.07    6.55
  -3 -11  -8   56.46    2.48
  -3  12   7    5.67    1.20
   3 -12  -7    7.50    1.38
   3 -12  -6   30.22    1.97
   3 -12  -6   29.36    2.01
  -3  12   6   29.66    1.78
  -3 -12   5   38.90    2.15
   3 -12  -5   36.98    2.11
   3 -12  -5   36.94    2.23
  -3  12   5   37.86    1.84
   3 -12  -4   -0.58    1.15
  -3 -12   4    0.22    1.01
   3 -12  -4    0.67    1.04
  -3  12   4    1.18    0.82
  -3 -12   3   27.15    1.83
   3 -12  -3   26.56    1.72
   3 -12  -3   28.03    2.00
  -3  12   3   28.85    1.51
  -3 -12   2   23.90    1.73
   3 -12  -2   25.33    1.62
   3 -12  -2   26.93    1.98
  -3  12   2   24.01    1.35
  -3 -12   1   14.84    1.49
   3 -12  -1   12.93    1.29
   3 -12  -1   12.75    1.54
  -3  12   1   13.05    1.05
   3 -12   0   14.66    1.28
  -3  12   0   17.55    1.08
   3 -12   1   29.19    2.03
   3 -12   1   31.58    1.61
   3  12   1   29.16    1.83
  -3  12  -1   30.02    1.29
   3 -12   2  215.03    5.03
   3 -12   2  208.52    4.11
  -3 -12  -2  202.38    4.72
   3  12   2  214.12    4.78
   3 -12   3   55.78    2.56
  -3 -12  -3   59.87    2.51
   3 -12   3   59.96    2.12
   3  12   3   59.22    2.57
   3 -12   4  114.04    3.51
  -3 -12  -4  105.23    3.34
   3 -12   4  110.24    2.84
   3  12   4  112.50    3.50
   3 -12   5    3.68    1.09
  -3 -12  -5    4.06    1.14
   3 -12   5    5.16    0.94
   3  12   5    5.87    1.30
   3 -12   6    9.69    1.33
  -3 -12  -6    6.34    1.28
   3 -12   6    6.84    0.99
  -3 -13   5  153.89    4.20
   3 -13  -5  157.18    4.13
   3 -13  -5  153.44    4.47
  -3  13   5  150.10    3.70
  -3 -13   4  127.13    3.79
   3 -13  -4  130.38    3.70
   3 -13  -4  125.18    4.02
  -3  13   4  122.43    3.22
  -3 -13   3  157.73    4.24
   3 -13  -3  157.52    4.01
   3 -13  -3  156.65    4.49
  -3  13   3  159.16    3.56
   3 -13  -2    0.14    1.20
   3 -13  -2    0.45    0.96
  -3 -13   2    0.06    1.07
   3 -13  -1    4.67    1.32
   3 -13  -1    2.71    1.03
  -3 -13   1    3.21    1.17
   3  13   0   44.46    2.18
   3 -13   0   44.99    2.04
   3 -13   1  119.11    3.84
   3  13   1  119.58    3.55
   3 -13   1  121.79    3.24
   3 -13   2    1.67    1.13
   3  13   2    1.43    1.05
  -3 -13  -2    1.41    1.15
   3 -13   2    0.94    0.87
   3 -13   3   51.60    2.55
   3  13   3   49.71    2.45
  -3 -13  -3   51.30    2.46
   3 -13   3   51.31    2.08
  -3 -13  -4   21.90    1.78
   3 -13   4   23.18    1.50
   3 -13   4   20.80    1.78
   4   0 -14   32.64    1.90
  -4   0  14   33.13    1.06
   4   0 -13    0.35    0.89
  -4   0  13    0.02    0.51
  -4   0  12  295.41    4.26
   4   0 -12  305.37    3.74
   4   0 -12  300.08    5.58
  -4   0  12  296.18    6.09
  -4   0  11    0.37    0.50
   4   0 -11    0.11    0.39
  -4   0  11   -0.11    0.93
   4   0 -11    1.22    0.82
   4   0 -11    1.55    0.82
   4   0 -10    7.89    1.04
  -4   0  10    8.96    0.74
   4   0 -10    8.93    0.64
   4   0 -10    8.30    1.02
  -4   0  10    8.32    1.15
  -4   0   9    0.02    0.47
  -4   0   9    0.09    0.71
   4   0  -9    0.20    0.68
   4   0  -9    0.51    0.41
  -4   0   8   63.16    2.21
   4   0  -8   61.70    2.03
  -4   0   8   64.63    1.69
   4   0  -8   62.67    1.54
  -4   0   7    0.27    0.46
  -4   0   7    0.68    0.62
   4   0  -7    0.57    0.63
   4   0  -7    1.07    0.44
   4   0  -6  477.03    5.98
  -4   0   6  478.51    6.09
  -4   0   6  485.45    6.78
   4   0  -5    0.04    0.35
  -4   0   5   -0.17    0.35
  -4   0   5   -0.12    0.34
  -4   0   5   -0.09    0.46
   4   0  -4    4.89    0.51
  -4   0   4    4.91    0.49
  -4   0   3    0.32    0.36
   4   0  -3    0.10    0.33
  -4   0   2 5016.23   48.70
   4   0  -2 4931.52   48.92
  -4   0   2 5007.15   48.90
   4   0  -1    0.99    0.37
   4   0  -1    0.70    0.31
  -4   0   1    1.08    0.36
  -4   0   1    0.81    0.38
   4   0   0  684.43    7.49
  -4   0   0  685.02    7.90
   4   0   0  681.02    7.88
  -4   0   0  690.81    7.92
   4   0   0  677.21    7.97
   4   0   1    0.77    0.22
  -4   0  -1    0.19    0.29
  -4   0  -1    0.17    0.29
   4   0   2  153.41    2.04
  -4   0  -2  154.86    2.56
  -4   0  -3    0.25    0.30
   4   0   3    0.87    0.33
   4   0   3    0.26    0.32
   4   0   3    0.24    0.27
  -4   0  -5    0.30    0.31
   4   0   5    0.15    0.38
  -4   0  -5    0.57    0.21
   4   0   5    0.40    0.34
   4   0   5    0.19    0.20
   4   0   5    0.08    0.36
   4   0   6    5.01    0.52
   4   0   6    5.39    0.51
   4   0   6    5.97    0.35
   4   0   6    4.84    0.58
   4   0   7    0.78    0.36
  -4   0  -7    1.23    0.26
   4   0   7    0.18    0.46
  -4   0  -7    1.63    0.51
  -4   0  -7    0.65    0.36
   4   0   7    0.06    0.35
   4   0   8    6.02    0.56
   4   0   8    6.51    0.49
  -4   0  -8    4.93    0.38
  -4   0  -8    7.19    0.76
   4   0   8    4.98    0.69
   4   0   9    0.22    0.31
  -4   0  -9    0.39    0.32
   4   0   9    0.10    0.61
  -4   0  -9    0.31    0.60
   4   0   9    0.43    0.40
  -4   0 -10 1339.55   14.93
  -4   0 -10 1309.91   13.30
   4   0  10 1298.50   13.52
   4   0  10 1281.12   12.95
   4   0  10 1293.88   12.92
   4   0  10 1298.57   15.11
  -4   0 -11    0.04    0.37
  -4   0 -11    0.04    0.75
   4   0  11    0.09    0.79
  -4   0 -12  459.79    6.94
   4   0  12  450.15    7.23
   4   0  13    0.57    0.93
   4  -1 -14   21.29    1.67
   4   1 -14   20.79    1.64
  -4   1  14   19.37    1.00
  -4   1  13   10.78    1.47
  -4  -1  13   10.03    0.61
  -4   1  13   10.05    0.84
   4   1 -13    9.06    1.28
   4  -1 -13    8.89    1.26
  -4   1  12   96.95    2.22
  -4  -1  12   93.25    1.86
   4   1 -12   93.03    1.54
   4  -1 -12   91.75    2.95
   4  -1 -12   93.33    1.77
  -4   1  12   91.05    3.26
   4  -1 -11   84.32    2.71
   4   1 -11   92.52    2.79
  -4   1  11   84.38    2.08
  -4  -1  11   91.57    1.89
   4  -1 -11   86.13    1.85
   4   1 -11   86.43    1.67
   4   1 -11   91.69    2.74
   4  -1 -11   87.73    2.74
  -4   1  11   91.69    3.11
   4  -1 -10   66.68    2.34
  -4   1  10   69.01    1.86
   4   1 -10   70.56    1.55
   4  -1 -10   69.56    1.68
  -4  -1  10   71.04    1.69
   4  -1 -10   72.47    2.41
  -4  -1  10   69.59    2.57
  -4   1  10   71.96    2.64
   4   1 -10   73.36    2.40
   4  -1  -9   52.78    1.97
  -4  -1   9   56.98    1.51
   4  -1  -9   53.44    1.49
   4   1  -9   54.30    1.38
   4  -1  -9   56.35    2.03
   4   1  -9   56.20    2.06
  -4  -1   9   57.51    2.25
  -4   1   9   52.90    2.16
  -4  -1   8  105.67    2.16
   4  -1  -8  103.39    2.15
   4   1  -8  107.67    2.10
  -4   1   8  107.35    2.14
   4  -1  -8  112.11    2.77
  -4  -1   8  109.49    2.94
   4   1  -8  104.43    2.73
  -4   1   8  107.34    2.92
  -4  -1   7   95.20    2.05
   4  -1  -7   96.79    2.05
  -4   1   7   99.58    2.07
   4   1  -7   94.35    2.00
   4  -1  -7  104.86    2.56
  -4  -1   7  103.62    2.74
  -4   1   7  105.14    2.74
   4   1  -7  103.60    2.61
   4   1  -6 1281.86   13.81
  -4   1   6 1314.56   13.87
   4   1  -6 1281.12   14.62
  -4  -1   6 1310.62   14.79
  -4   1   6 1280.66   14.70
  -4  -1   6 1265.56   13.81
   4  -1  -6 1297.04   13.84
  -4   1   5   10.19    0.66
   4   1  -5    8.41    0.62
   4   1  -5    5.49    0.67
  -4   1   5    6.27    0.71
  -4  -1   5    6.83    0.72
  -4  -1   5   10.34    0.67
   4  -1  -5    7.82    0.61
   4   1  -4  122.44    2.31
  -4   1   4  120.30    2.29
   4  -1  -4  119.63    2.28
  -4   1   4  115.12    2.40
  -4  -1   4  113.04    2.44
  -4  -1   4  121.47    2.29
   4  -1  -3  111.44    2.20
  -4  -1   3  109.84    2.24
   4   1  -3  111.66    2.13
   4   1  -3  110.54    2.20
  -4   1   3  112.72    2.21
   4  -1  -3  109.85    2.14
  -4  -1   2  486.81    5.99
   4  -1  -2  482.21    5.82
  -4   1   2  481.02    5.83
   4   1  -2  490.02    6.02
   4  -1  -2  493.88    6.09
  -4   1   2  476.87    6.06
  -4   1   1 2964.26   29.22
   4   1  -1 2978.49   29.78
  -4  -1   1 2989.20   29.78
   4  -1  -1 2997.34   29.84
  -4   1   1 2979.84   29.80
  -4   1   1 2996.45   29.82
   4   1  -1 2945.13   29.91
   4  -1  -1 2964.46   29.28
  -4  -1   0 2451.57   25.05
   4   1   0 2477.12   25.13
   4  -1   0 2499.24   24.40
   4   1   0 2525.47   25.22
  -4   1   0 2456.48   25.12
  -4   1   0 2473.82   25.07
   4  -1   0 2490.73   25.15
   4  -1   1  966.17    9.86
   4   1   1  974.38   10.16
  -4   1  -1  967.77   10.64
  -4  -1  -1  975.25   10.58
  -4   1  -1  947.04   10.58
   4   1   2  973.66   10.04
  -4  -1  -2  976.40   10.18
   4  -1   2  969.10    9.72
  -4   1  -2  957.32   10.62
   4  -1   2  957.81    9.87
  -4   1  -2  984.97   10.59
  -4  -1  -2  952.99   10.54
  -4   1  -3  189.11    2.90
   4   1   3  192.11    3.04
  -4  -1  -3  184.41    2.86
   4  -1   3  186.12    2.97
  -4   1  -3  183.98    2.95
   4   1   3  187.65    3.04
  -4  -1  -3  185.98    2.59
   4  -1   3  185.81    2.53
   4   1   3  185.12    2.89
   4  -1   3  188.94    2.08
   4   1   3  188.82    2.53
  -4   1  -4    5.93    0.51
  -4  -1  -4    6.12    0.50
   4   1   4    6.42    0.57
  -4   1  -4    5.79    0.53
   4   1   4    6.24    0.56
  -4  -1  -4    7.02    0.44
   4  -1   4    5.63    0.53
   4   1   4    5.38    0.54
   4  -1   4    5.72    0.44
   4   1   4    6.27    0.43
   4   1   5 1230.51   13.40
  -4  -1  -5 1239.66   13.20
  -4   1  -5 1260.82   13.07
   4   1   5 1268.47   13.40
  -4  -1  -5 1260.89   12.77
   4  -1   5 1234.84   13.24
   4   1   5 1247.90   12.86
   4  -1   5 1264.94   13.15
   4   1   5 1228.93   13.61
   4   1   6  344.39    4.71
  -4   1  -6  355.15    4.33
  -4  -1  -6  348.35    4.57
   4   1   6  345.44    4.64
  -4  -1  -6  353.09    4.20
   4  -1   6  345.24    4.48
   4   1   6  349.44    4.29
   4  -1   6  344.88    4.65
   4   1   6  352.15    5.03
  -4   1  -6  340.93    4.58
   4  -1   7  199.79    3.35
   4   1   7  206.93    3.65
  -4   1  -7  202.87    3.29
  -4   1  -7  207.51    2.85
   4   1   7  195.56    3.20
  -4  -1  -7  203.99    3.18
   4   1   7  207.04    3.14
   4  -1   7  204.04    2.98
   4   1   7  205.55    2.90
  -4  -1  -7  204.68    2.84
   4   1   8   22.98    1.21
  -4  -1  -8   20.81    1.13
  -4   1  -8   22.72    1.10
  -4   1  -8   22.79    0.79
   4   1   8   22.29    0.97
   4   1   8   23.12    0.88
  -4   1  -8   20.21    0.44
   4  -1   8   23.00    0.81
   4  -1   8   21.22    1.11
  -4  -1  -8   23.39    0.82
  -4   1  -9  119.77    2.62
  -4  -1  -9  120.25    2.78
   4   1   9  116.77    2.84
   4   1   9  115.33    2.26
   4   1   9  118.65    1.99
  -4   1  -9  111.19    1.49
   4  -1   9  117.76    1.87
  -4  -1  -9  114.97    2.04
   4  -1   9  114.45    2.69
   4   1  10   53.72    2.00
   4  -1  10   57.41    2.01
  -4   1 -10   53.52    1.83
  -4  -1 -10   58.06    1.97
   4   1  10   57.27    1.49
   4   1  10   54.99    1.13
   4  -1  10   51.94    0.92
   4   1  10   55.20    1.16
  -4   1 -10   53.43    0.94
  -4  -1 -10   55.96    1.39
   4   1  11  421.03    5.26
  -4   1 -11  417.30    6.21
  -4  -1 -11  415.95    6.41
  -4   1 -11  405.35    4.48
  -4  -1 -11  412.64    5.18
   4   1  11  407.22    6.61
   4  -1  11  406.92    6.46
  -4   1 -12   48.76    1.92
   4  -1  12   48.34    2.09
   4   1  12   51.99    2.21
   4   1  12   49.02    1.29
   4   1  13    1.66    0.98
   4  -1  13    2.20    1.01
   4   2 -14   14.93    1.45
   4  -2 -14   15.32    1.52
  -4   2  14   14.25    1.00
  -4  -2  13   54.56    0.98
   4   2 -13   50.96    2.26
   4  -2 -13   49.65    2.34
  -4  -2  13   54.11    2.60
  -4   2  13   54.80    2.65
  -4   2  13   48.76    1.68
  -4  -2  12  157.99    2.31
   4  -2 -12  160.94    2.69
   4  -2 -12  161.89    4.04
  -4   2  12  159.10    4.34
  -4  -2  11   58.88    1.36
   4  -2 -11   59.32    2.33
   4   2 -11   60.15    1.34
   4  -2 -11   56.18    1.58
   4  -2 -11   65.09    2.40
   4   2 -11   60.96    2.35
  -4   2  11   58.56    2.54
  -4  -2  10  416.45    5.19
  -4   2  10  418.01    5.45
   4  -2 -10  428.97    5.64
   4   2 -10  419.50    5.20
   4  -2 -10  418.40    6.70
  -4   2  10  422.94    7.11
   4   2 -10  414.42    6.66
  -4   2   9    2.91    0.53
  -4  -2   9    1.53    0.46
   4   2  -9    0.79    0.81
   4   2  -9    1.35    0.44
   4  -2  -9    1.12    0.50
   4  -2  -9    0.99    0.72
  -4   2   9    0.47    0.77
  -4  -2   9    0.52    0.76
  -4  -2   8  384.27    5.02
   4  -2  -8  386.63    5.34
  -4   2   8  393.17    5.24
   4   2  -8  392.03    5.12
  -4  -2   8  385.15    6.30
  -4   2   8  378.68    6.24
   4   2  -8  387.84    6.12
  -4  -2   7  391.33    5.06
   4  -2  -7  390.86    5.29
   4   2  -7  390.27    5.17
  -4   2   7  378.50    5.18
   4  -2  -7  391.54    5.93
  -4  -2   7  389.66    6.10
   4   2  -7  391.20    6.00
  -4   2   7  380.30    6.05
  -4  -2   6 3010.14   30.23
   4   2  -6 2993.79   30.39
  -4   2   6 3027.12   30.45
   4  -2  -6 3042.54   30.51
   4  -2  -6 3025.07   31.14
   4   2  -6 3033.54   31.29
  -4   2   6 3035.74   31.25
  -4  -2   6 3024.57   31.40
   4  -2  -5   12.80    0.83
  -4  -2   5   12.67    0.74
   4   2  -5   14.11    0.80
  -4   2   5   11.86    0.76
  -4  -2   5   12.95    0.91
   4  -2  -5   12.16    0.78
   4  -2  -5   12.32    0.88
   4   2  -5   12.20    0.93
  -4   2   5   12.41    0.87
  -4  -2   4  963.12   10.57
  -4   2   4  964.01   10.72
   4   2  -4  953.44   10.75
   4   2  -4  955.13   10.56
  -4  -2   4  956.86   11.03
   4  -2  -4  955.17   10.74
   4  -2  -4  950.40   10.93
   4  -2  -4  948.21   10.63
   4   2  -4  928.50   11.09
  -4   2   4  964.60   10.88
   4   2  -3 1425.76   14.92
  -4  -2   3 1387.18   15.01
   4   2  -3 1381.11   14.90
   4  -2  -3 1416.00   14.89
   4   2  -3 1355.94   14.71
   4   2  -3 1386.38   15.09
   4  -2  -3 1363.10   14.54
  -4   2   3 1400.73   14.73
  -4   2   2 5331.07   52.96
   4   2  -2 5486.95   52.88
   4  -2  -2 5417.03   52.98
   4   2  -2 5388.84   52.87
  -4   2   2 5384.69   52.50
   4  -2  -2 5411.29   52.39
  -4  -2   1  527.17    6.41
   4   2  -1  518.45    6.48
  -4   2   1  537.46    6.56
   4  -2  -1  536.82    6.57
   4  -2  -1  529.82    6.20
   4  -2  -1  534.81    5.87
  -4   2   1  527.40    5.89
   4   2   0  318.00    4.36
  -4  -2   0  309.06    4.26
  -4   2   0  309.01    4.34
  -4  -2   0  312.18    4.22
   4  -2   0  315.03    4.37
   4  -2   0  311.87    3.90
   4  -2   0  308.99    3.54
  -4  -2  -1   22.70    0.89
   4   2   1   23.38    0.97
  -4   2  -1   26.82    0.99
  -4   2  -1   23.47    0.95
  -4  -2  -1   24.13    0.89
   4   2   1   25.03    0.83
   4  -2   1   24.30    0.68
   4  -2   1   24.41    0.52
   4  -2   2  398.63    4.19
  -4  -2  -2  402.66    5.12
  -4   2  -2  400.79    5.22
  -4   2  -2  406.56    5.15
  -4  -2  -2  405.19    4.98
   4  -2   2  398.78    4.31
   4   2   2  411.30    4.85
  -4   2  -3  481.66    5.83
  -4  -2  -3  468.36    5.80
  -4   2  -3  472.79    5.90
  -4  -2  -3  483.56    5.63
   4  -2   3  463.79    5.91
   4  -2   3  472.60    5.03
   4   2   3  483.99    5.58
  -4   2  -4  251.68    3.52
  -4  -2  -4  246.26    3.60
   4   2   4  239.40    3.71
  -4   2  -4  244.21    3.61
  -4  -2  -4  246.79    3.36
   4  -2   4  247.70    3.64
   4   2   4  249.99    3.42
   4   2   4  244.39    3.84
   4  -2   4  248.81    3.08
   4   2   5  281.39    4.35
  -4  -2  -5  280.48    4.02
   4   2   5  290.96    4.16
  -4   2  -5  288.71    3.81
  -4   2  -5  288.06    3.97
   4   2   5  277.23    4.12
  -4  -2  -5  286.03    3.75
   4  -2   5  285.19    3.96
   4  -2   5  282.88    3.67
   4   2   5  273.88    3.81
  -4   2  -6   44.55    1.20
   4   2   6   43.97    1.55
   4   2   6   42.51    1.37
  -4  -2  -6   42.16    1.34
  -4   2  -6   41.61    1.08
   4   2   6   44.49    1.35
  -4   2  -6   44.86    1.25
  -4  -2  -6   45.16    1.19
   4  -2   6   42.90    1.23
   4   2   6   44.05    1.23
   4  -2   6   44.58    1.24
   4  -2   7   14.40    0.83
  -4   2  -7   14.76    0.61
   4   2   7   15.96    0.88
   4   2   7   15.50    0.82
  -4   2  -7   14.66    0.79
   4   2   7   14.00    1.01
   4  -2   7   14.92    0.73
   4   2   7   14.96    0.77
  -4  -2  -7   14.90    0.75
   4  -2   8   59.79    1.76
   4   2   8   64.34    2.06
  -4   2  -8   60.22    1.67
   4   2   8   65.74    1.72
  -4   2  -8   61.31    1.20
   4   2   8   62.88    1.57
   4  -2   8   63.89    1.43
   4   2   8   64.89    1.59
  -4  -2  -8   62.04    1.52
   4  -2   9    0.63    0.59
   4   2   9    1.24    0.51
   4   2   9    0.81    0.41
  -4  -2  -9    0.61    0.47
   4   2   9    0.81    0.40
   4   2   9    0.95    0.48
   4  -2   9    1.11    0.36
   4   2   9    1.40    0.71
  -4   2  -9    0.82    0.55
   4  -2  10    4.54    0.80
   4   2  10    2.85    0.60
   4   2  10    3.83    0.47
   4   2  10    4.32    0.88
  -4   2 -10    4.73    0.75
   4  -2  10    3.49    0.31
   4   2  10    3.99    0.49
  -4  -2 -10    3.57    0.60
  -4   2 -11   29.12    1.41
   4   2  11   27.92    1.15
   4   2  11   28.63    0.77
   4   2  11   27.31    0.79
   4   2  11   28.94    1.66
   4  -2  11   29.24    1.55
  -4  -2 -11   29.01    1.15
  -4   2 -12   43.77    1.81
   4   2  12   50.43    1.49
  -4  -2 -12   44.41    1.44
   4   2  12   42.82    2.09
   4  -2  12   49.52    2.05
   4  -2  13    6.40    1.10
   4   2  13    6.09    1.23
   4  -3 -14   85.23    3.07
   4   3 -14   83.45    2.86
   4  -3 -13  154.22    4.10
  -4   3  13  161.94    4.50
  -4  -3  13  162.09    4.42
  -4   3  12    8.86    1.38
  -4  -3  12    6.79    1.27
  -4   3  12    8.02    0.70
  -4  -3  12    8.51    0.47
   4  -3 -12    7.97    0.76
   4  -3 -12    8.94    1.28
  -4  -3  11  462.58    5.23
   4   3 -11  453.11    5.49
  -4   3  11  453.42    5.89
   4  -3 -11  459.65    7.42
   4   3 -11  457.51    5.47
   4  -3 -11  445.66    6.06
  -4   3  11  445.52    7.67
  -4  -3  10   42.15    1.10
   4  -3 -10   40.92    1.47
   4   3 -10   40.59    1.24
  -4   3  10   41.09    1.38
   4  -3 -10   40.98    1.98
  -4   3  10   41.01    2.04
   4   3 -10   39.38    1.93
  -4  -3   9   56.07    1.33
   4  -3  -9   55.17    1.71
   4   3  -9   54.63    1.49
  -4   3   9   56.07    1.62
   4  -3  -9   54.85    2.13
  -4   3   9   55.74    2.24
   4   3  -9   56.01    2.13
  -4  -3   8  116.04    2.10
  -4   3   8  115.21    2.40
   4   3  -8  114.50    2.32
   4  -3  -8  118.21    2.55
   4  -3  -8  110.50    2.92
   4   3  -8  110.47    2.96
  -4   3   8  115.77    3.05
   4  -3  -7  195.78    3.70
  -4  -3   7  201.05    3.05
   4   3  -7  198.16    3.31
  -4   3   7  198.03    3.38
  -4  -3   7  199.92    4.00
   4  -3  -7  196.10    3.48
   4  -3  -7  195.37    3.88
   4   3  -7  203.06    3.97
  -4   3   7  196.12    3.93
   4  -3  -6    5.70    0.75
   4   3  -6    5.21    0.63
  -4  -3   6    4.42    0.51
   4   3  -6    3.79    0.55
   4   3  -6    8.32    0.81
  -4   3   6    4.54    0.61
   4  -3  -6    5.53    0.69
  -4  -3   6    3.80    0.74
  -4   3   6    8.38    0.87
   4   3  -6    4.65    0.81
   4  -3  -6    4.20    0.69
   4  -3  -5    0.46    0.51
  -4  -3   5    0.55    0.39
   4   3  -5    0.36    0.40
   4   3  -5    0.42    0.50
  -4   3   5    0.60    0.43
   4  -3  -5    0.61    0.49
   4  -3  -5    0.53    0.45
  -4   3   5    0.37    0.48
   4   3  -5    0.62    0.58
  -4  -3   5    2.69    0.61
  -4  -3   4   27.97    1.01
   4   3  -4   26.95    1.05
  -4   3   4   26.82    1.10
   4  -3  -4   28.43    1.16
   4   3  -4   27.74    1.26
  -4   3   4   27.28    1.12
   4  -3  -4   28.45    1.07
   4   3  -4   26.43    1.14
  -4  -3   4   27.56    1.22
   4   3  -3  386.46    5.26
   4   3  -3  394.67    5.13
  -4  -3   3  373.57    4.96
   4  -3  -3  386.63    5.35
   4  -3  -3  381.89    4.85
  -4   3   3  387.58    5.02
   4   3  -3  381.45    5.43
   4   3  -2   43.06    1.40
   4   3  -2   40.30    1.30
   4   3  -2   40.71    1.28
   4  -3  -2   41.10    1.37
  -4   3   2   41.14    1.33
  -4   3   2   40.17    1.10
   4  -3  -2   43.12    1.05
   4  -3  -1  422.62    4.68
  -4  -3   1  412.78    5.30
   4   3  -1  411.08    5.46
  -4  -3   1  419.58    5.52
   4  -3  -1  420.47    5.61
  -4   3   1  417.89    5.53
   4  -3  -1  418.35    5.21
  -4   3   1  406.77    4.74
   4   3   0    5.11    0.55
  -4  -3   0    4.66    0.51
  -4   3   0    6.30    0.28
  -4   3   0    4.67    0.55
   4  -3   0    6.72    0.63
   4  -3   0    5.66    0.44
   4  -3   0    6.40    0.28
  -4   3  -1    9.48    0.67
   4   3   1    9.00    0.66
   4  -3   1    9.35    0.47
  -4  -3  -1    9.49    0.64
  -4   3  -2   43.23    1.33
  -4  -3  -2   45.19    1.29
  -4  -3  -2   46.61    1.34
   4   3   2   46.87    1.24
   4  -3   2   45.51    0.89
  -4   3  -3  387.52    5.01
  -4   3  -3  381.02    5.12
  -4  -3  -3  388.81    5.00
   4  -3   3  395.20    5.24
  -4  -3  -3  384.42    5.14
   4  -3   3  381.70    3.90
  -4  -3  -4   17.94    0.91
   4   3   4   17.34    0.91
  -4   3  -4   19.10    0.82
  -4   3  -4   18.97    0.88
  -4  -3  -4   20.96    0.87
   4  -3   4   18.59    0.89
   4  -3   4   17.79    0.53
   4   3   4   16.36    0.80
   4   3   5 1596.83   17.49
  -4   3  -5 1598.37   16.06
   4   3   5 1599.40   17.06
  -4  -3  -5 1628.84   17.12
  -4   3  -5 1612.74   16.83
  -4  -3  -5 1612.08   16.74
   4  -3   5 1606.03   16.93
   4  -3   5 1618.04   16.20
   4   3   5 1660.37   16.88
  -4   3  -6  153.96    2.39
   4   3   6  163.96    3.28
   4   3   6  159.09    2.90
  -4   3  -6  161.92    2.46
  -4   3  -6  154.77    2.66
  -4  -3  -6  152.12    2.66
   4  -3   6  155.86    2.73
   4   3   6  146.78    2.73
   4  -3   6  153.90    2.50
   4   3   7    2.22    0.55
  -4   3  -7    3.21    0.40
  -4   3  -7    2.90    0.47
   4   3   7    2.50    0.54
  -4  -3  -7    2.63    0.53
   4  -3   7    3.07    0.49
  -4   3  -7    3.50    0.48
   4   3   7    3.28    0.71
   4  -3   7    3.58    0.53
   4  -3   8   52.52    1.60
  -4   3  -8   54.49    1.06
   4   3   8   54.14    1.64
  -4   3  -8   55.43    1.36
   4   3   8   55.65    1.58
   4   3   8   53.41    1.98
  -4   3  -8   57.11    1.54
   4  -3   8   57.96    1.46
   4   3   8   55.43    1.63
   4   3   8   56.60    1.53
  -4  -3  -8   52.57    1.54
   4  -3   9   74.00    2.03
   4   3   9   71.81    1.76
   4   3   9   70.97    1.91
   4   3   9   71.61    2.37
  -4   3  -9   76.02    1.92
   4  -3   9   70.19    1.52
   4   3   9   73.95    1.75
   4   3   9   70.73    1.88
  -4  -3  -9   68.27    1.82
   4  -3  10   11.94    1.00
   4   3  10   12.28    0.90
   4   3  10   11.71    0.76
   4   3  10   11.67    1.20
  -4   3 -10   12.09    0.93
   4   3  10   11.30    0.75
   4  -3  10   12.46    0.54
   4   3  10   12.31    0.89
  -4  -3 -10   12.61    0.90
   4   3  11   28.97    1.27
   4   3  11   26.69    0.94
  -4   3 -11   27.96    1.35
   4   3  11   26.79    1.68
   4   3  11   25.50    0.95
   4  -3  11   29.33    1.48
  -4  -3 -11   27.33    1.23
   4   3  12   31.56    0.79
   4   3  12   33.79    1.35
   4   3  12   32.20    0.82
   4  -3  12   33.30    1.68
   4   3  12   33.72    1.90
  -4  -3 -12   33.69    1.37
   4   3  13  270.50    5.63
   4  -3  13  273.65    5.13
   4  -4 -14   14.02    1.56
  -4   4  13   85.70    1.93
  -4  -4  13   79.57    3.12
  -4   4  13   84.51    3.30
   4  -4 -13   83.80    3.03
  -4   4  12   28.65    1.20
   4  -4 -12   26.52    1.79
   4  -4 -12   29.51    1.28
  -4   4  12   29.18    2.01
  -4  -4  12   30.26    1.98
  -4   4  11  488.03    8.10
  -4  -4  11  488.27    5.49
  -4   4  11  478.78    6.36
   4   4 -11  481.44    5.96
  -4  -4  11  489.54    8.01
   4  -4 -11  487.91    6.63
   4   4 -11  482.77    5.95
   4  -4 -11  478.02    7.82
   4  -4 -10  216.67    4.49
  -4  -4  10  223.28    3.04
   4   4 -10  216.84    3.45
  -4   4  10  213.42    3.66
  -4  -4  10  215.69    4.74
   4   4 -10  225.16    4.30
   4  -4 -10  219.31    4.66
   4  -4 -10  224.82    3.93
   4   4 -10  218.53    3.38
   4   4 -10  218.40    4.59
  -4   4  10  219.41    4.78
   4  -4  -9  183.28    3.88
  -4  -4   9  174.37    2.67
   4   4  -9  184.90    3.16
  -4   4   9  176.61    3.25
   4   4  -9  184.51    3.72
   4  -4  -9  175.23    3.44
   4  -4  -9  183.51    4.09
  -4   4   9  174.03    4.05
   4   4  -9  174.50    3.94
   4  -4  -8  125.27    3.00
  -4  -4   8  122.15    2.15
  -4   4   8  125.29    2.63
   4   4  -8  123.56    2.53
   4   4  -8  124.25    2.91
   4  -4  -8  125.61    2.82
   4  -4  -8  123.02    3.18
   4   4  -8  123.95    3.16
  -4   4   8  116.02    3.10
   4  -4  -7  785.55    9.84
  -4  -4   7  792.34    8.75
  -4   4   7  771.40    9.34
   4   4  -7  767.34    8.94
   4   4  -7  771.56    9.71
   4  -4  -7  783.62    9.68
   4  -4  -7  793.07   10.22
  -4   4   7  793.59   10.10
   4   4  -7  792.44   10.21
   4  -4  -6  104.29    2.45
  -4  -4   6  105.24    2.02
   4   4  -6  101.43    2.13
  -4   4   6  107.31    2.37
   4  -4  -6   98.97    2.46
   4   4  -6   95.43    2.62
  -4   4   6  104.00    2.57
   4  -4  -6  108.74    2.72
   4   4  -6  100.42    2.46
   4  -4  -5   36.78    1.34
   4   4  -5   38.20    1.25
  -4  -4   5   38.45    1.20
  -4  -4   5   40.38    1.57
   4   4  -5   37.51    1.43
   4  -4  -5   38.37    1.47
  -4   4   5   37.00    1.38
   4  -4  -5   39.03    1.57
   4   4  -5   40.82    1.62
  -4   4   5   37.28    1.42
  -4  -4   4    1.62    0.45
   4   4  -4    1.71    0.48
  -4   4   4    0.83    0.47
   4  -4  -4    1.95    0.59
   4  -4  -4    1.46    0.43
  -4   4   4    1.55    0.50
   4   4  -4    2.43    0.62
   4   4  -3 1823.70   19.41
   4   4  -3 1835.29   19.69
   4  -4  -3 1845.70   18.88
   4  -4  -3 1845.67   19.72
   4   4  -3 1836.04   19.22
  -4  -4   3 1840.51   19.02
  -4   4   3 1850.18   19.02
   4   4  -2 1494.45   16.04
   4   4  -2 1501.52   16.09
  -4  -4   2 1500.52   16.37
   4   4  -2 1510.32   16.33
   4  -4  -2 1502.96   15.38
  -4   4   2 1502.89   16.18
   4  -4  -2 1512.25   16.50
   4  -4  -2 1489.68   16.06
  -4   4   2 1516.82   15.51
   4  -4  -1 1788.13   17.69
   4   4  -1 1766.09   18.58
  -4  -4   1 1787.97   18.88
   4   4  -1 1772.68   18.67
   4  -4  -1 1790.06   19.11
  -4   4   1 1806.79   18.82
  -4   4   1 1780.92   17.78
   4  -4  -1 1750.61   18.48
   4  -4   0 2268.81   21.57
   4   4   0 2258.21   22.99
  -4  -4   0 2277.13   22.89
  -4   4   0 2265.60   23.08
   4  -4   0 2216.52   23.37
  -4  -4   0 2259.56   23.09
   4  -4   0 2264.06   22.53
  -4  -4  -1  286.59    4.22
   4   4   1  284.24    4.24
  -4  -4  -1  283.84    4.19
   4  -4   1  282.44    3.68
  -4   4  -1  289.48    4.26
  -4  -4  -2  581.81    7.14
  -4  -4  -2  588.38    7.23
   4   4   2  577.68    7.23
   4   4   2  588.31    7.06
   4  -4   2  578.69    6.31
  -4   4  -2  577.15    7.22
  -4  -4  -3  351.19    4.82
   4  -4   3  356.62    5.09
  -4   4  -3  345.28    4.87
  -4  -4  -3  351.04    5.00
   4   4   3  348.21    4.77
   4  -4   3  343.76    3.78
  -4   4  -4 1306.04   14.16
  -4  -4  -4 1306.41   14.12
   4  -4   4 1336.16   14.42
  -4  -4  -4 1305.53   14.46
   4   4   4 1291.12   14.30
   4   4   4 1297.42   14.19
  -4   4  -5  205.35    2.55
   4   4   5  204.90    3.51
  -4   4  -5  202.64    3.35
  -4   4  -5  201.83    3.13
  -4  -4  -5  205.82    3.38
   4  -4   5  207.68    3.50
   4  -4   5  213.30    2.62
   4   4   5  211.56    3.49
   4   4   6  594.99    8.18
  -4   4  -6  602.04    6.71
  -4   4  -6  602.50    6.98
   4   4   6  627.89    7.70
  -4   4  -6  618.08    7.40
  -4  -4  -6  625.23    7.55
   4  -4   6  609.17    7.56
   4   4   6  610.88    7.64
   4  -4   6  598.70    6.80
   4  -4   7 1259.16   13.34
  -4   4  -7 1263.43   12.98
   4   4   7 1273.27   13.99
  -4   4  -7 1237.63   13.50
  -4   4  -7 1241.90   13.16
   4   4   7 1269.41   14.83
   4  -4   7 1258.52   13.73
   4   4   7 1241.81   13.80
  -4  -4  -7 1258.78   13.84
   4   4   7 1264.30   13.98
   4  -4   8 1793.38   18.72
   4   4   8 1780.39   19.14
  -4   4  -8 1800.20   17.71
  -4   4  -8 1795.99   18.49
  -4   4  -8 1761.51   18.49
   4   4   8 1815.43   20.16
   4  -4   8 1799.94   18.68
   4   4   8 1773.32   18.93
   4   4   8 1796.86   19.17
  -4  -4  -8 1757.02   19.00
   4  -4   9  114.91    2.49
   4   4   9  110.47    2.52
  -4   4  -9  109.73    2.03
  -4  -4  -9  111.58    2.51
   4  -4   9  109.27    2.12
   4   4   9  111.62    2.41
   4   4   9  109.71    2.56
   4   4   9  114.22    3.11
  -4   4  -9  110.72    2.30
   4  -4  10    2.16    0.67
   4   4  10    1.42    0.64
   4   4  10    0.93    0.51
  -4  -4 -10    1.41    0.67
   4   4  10    1.12    0.65
   4  -4  10    2.05    0.42
   4   4  10    0.87    0.55
  -4   4 -10    1.28    0.57
   4   4  10    0.83    0.89
   4  -4  11  164.06    3.41
   4   4  11  160.53    3.19
   4   4  11  162.50    2.83
   4   4  11  156.55    3.97
  -4   4 -11  166.94    3.22
   4   4  11  159.39    2.82
   4   4  11  166.05    3.31
  -4  -4 -11  163.21    3.23
   4   4  12   77.74    2.16
   4   4  12   80.71    1.68
  -4  -4 -12   80.51    2.22
   4   4  12   83.56    2.96
   4  -4  12   79.02    2.42
   4  -4  13   75.90    2.48
   4   4  13   74.23    2.93
  -4  -5  13   47.29    2.42
   4  -5 -13   45.50    2.40
   4  -5 -12    4.49    1.21
  -4   5  12    6.16    0.81
   4  -5 -12    5.60    0.81
  -4  -5  12    6.89    1.26
  -4   5  12    5.39    1.24
   4  -5 -11    4.42    1.08
   4   5 -11    3.66    0.60
  -4   5  11    3.89    0.75
   4  -5 -11    4.20    0.81
  -4  -5  11    5.05    1.16
  -4   5  11    4.50    1.17
   4  -5 -10   14.46    1.41
   4   5 -10   13.49    0.91
  -4   5  10   14.18    1.01
   4  -5 -10   14.64    1.32
  -4  -5  10   14.49    1.37
   4   5 -10   14.38    1.19
   4   5 -10   13.78    0.89
   4  -5 -10   15.08    1.12
  -4   5  10   13.88    1.43
   4   5 -10   12.86    1.34
   4   5  -9   20.73    1.49
  -4   5   9   23.11    1.55
   4  -5  -9   21.69    1.44
  -4  -5   9   20.91    0.88
  -4   5   9   19.18    1.11
   4   5  -9   21.83    1.11
  -4  -5   9   21.55    1.51
   4   5  -9   26.11    1.42
   4  -5  -9   23.95    1.34
   4   5  -9   21.03    1.06
   4  -5  -9   26.86    1.64
   4   5  -8  280.42    5.20
  -4   5   8  279.78    5.13
   4  -5  -8  280.07    4.95
  -4  -5   8  284.10    3.92
   4   5  -8  280.53    4.80
  -4   5   8  288.36    4.55
   4  -5  -8  274.42    4.79
   4   5  -8  283.43    4.27
   4  -5  -8  273.68    5.20
   4  -5  -7  432.65    6.36
  -4  -5   7  421.51    5.42
   4   5  -7  420.68    5.61
   4   5  -7  432.60    6.29
   4  -5  -7  441.51    6.44
  -4   5   7  426.12    6.04
   4   5  -7  438.63    6.77
  -4   5   7  431.95    6.53
   4  -5  -7  441.58    6.78
   4   5  -6  265.21    4.04
  -4  -5   6  271.62    3.89
   4   5  -6  267.82    4.49
   4  -5  -6  268.17    4.47
   4  -5  -6  279.49    4.74
  -4   5   6  270.74    4.37
  -4   5   6  264.79    4.56
   4   5  -6  272.13    4.86
   4  -5  -6  272.42    4.86
   4   5  -5  279.29    4.50
   4  -5  -5  278.90    4.35
  -4   5   5  278.64    4.44
   4  -5  -5  279.18    4.76
  -4  -5   5  278.74    4.00
   4   5  -5  280.96    4.18
   4   5  -5  266.74    4.77
  -4   5   5  275.73    4.44
   4   5  -4 1060.08   12.20
   4  -5  -4 1074.60   11.86
  -4   5   4 1048.24   12.22
   4  -5  -4 1069.49   12.66
  -4  -5   4 1067.57   11.74
   4   5  -4 1065.78   11.92
  -4   5   4 1060.88   11.94
   4   5  -4 1069.36   12.60
   4   5  -3 1149.80   12.56
  -4  -5   3 1114.03   12.37
   4   5  -3 1128.72   12.69
   4   5  -3 1128.84   13.03
   4  -5  -3 1111.80   12.14
   4  -5  -3 1115.46   13.19
  -4   5   3 1130.58   12.68
  -4   5   3 1137.63   12.27
  -4   5   2  533.14    6.31
   4   5  -2  542.20    6.84
   4   5  -2  529.59    6.83
   4   5  -2  547.78    7.18
  -4  -5   2  545.43    7.21
   4  -5  -2  535.12    6.23
  -4   5   2  542.77    7.08
   4  -5  -2  541.06    7.39
  -4   5   2  534.62    6.80
   4  -5  -2  546.43    6.96
  -4   5   1   20.59    0.71
   4   5  -1   22.51    1.04
  -4  -5   1   20.47    1.09
   4   5  -1   21.02    1.00
   4  -5  -1   20.74    0.68
  -4   5   1   21.14    1.10
   4  -5  -1   19.61    1.15
  -4   5   1   20.88    0.93
   4  -5  -1   20.40    0.99
  -4   5   0  583.38    6.20
  -4  -5   0  576.43    7.59
  -4  -5   0  596.63    7.45
   4   5   0  592.97    7.41
  -4   5   0  601.35    7.57
   4  -5   0  597.82    7.89
  -4   5   0  604.89    7.04
   4  -5   0  601.06    7.09
  -4  -5  -1  239.59    3.94
  -4  -5  -1  239.39    3.96
   4   5   1  240.32    3.86
  -4   5  -1  243.19    3.94
  -4   5  -1  240.80    3.39
   4  -5   1  239.44    3.40
  -4  -5  -2   17.04    0.97
  -4  -5  -2   12.14    0.87
   4   5   2   12.52    0.87
  -4   5  -2   11.03    0.82
   4  -5   2   13.12    0.95
  -4   5  -2   12.29    0.60
   4  -5   2   15.57    0.64
   4   5   2   11.83    0.82
  -4   5  -3   53.21    1.60
   4  -5   3   51.87    1.73
   4   5   3   54.47    1.62
   4  -5   3   52.64    1.07
  -4   5  -3   55.58    1.13
  -4  -5  -3   51.50    1.61
   4  -5   4   45.44    1.63
  -4   5  -4   42.03    1.45
   4   5   4   46.07    1.54
  -4   5  -4   45.10    0.86
  -4  -5  -4   43.30    1.47
   4  -5   4   41.24    0.84
  -4   5  -5  450.28    4.76
   4   5   5  456.74    6.20
  -4  -5  -5  457.20    6.16
  -4   5  -5  442.26    5.99
   4  -5   5  452.48    6.31
   4   5   5  460.59    6.23
   4   5   5  465.33    6.28
  -4   5  -6  845.38    8.91
   4   5   6  855.36   10.19
  -4   5  -6  863.53    9.51
  -4   5  -6  850.51    9.91
   4  -5   6  862.63    8.94
  -4  -5  -6  852.37   10.16
   4  -5   6  835.47   10.19
   4   5   6  859.84   10.24
   4   5   6  860.32   10.29
  -4   5  -7   69.18    1.44
  -4   5  -7   68.50    1.48
   4   5   7   68.98    1.96
  -4   5  -7   71.31    1.82
   4  -5   7   68.11    1.48
   4  -5   7   71.00    1.94
   4   5   7   65.74    1.96
  -4  -5  -7   68.65    1.99
   4   5   7   71.13    2.06
   4  -5   8    9.86    0.70
  -4   5  -8   10.14    0.76
  -4   5  -8   11.08    0.54
   4   5   8   10.78    0.94
  -4   5  -8   11.76    0.70
   4   5   8   11.30    1.17
   4   5   8   10.94    0.99
   4   5   8   11.91    0.94
   4  -5   8   10.13    0.81
  -4  -5  -8   10.15    0.94
   4  -5   9   34.68    1.27
  -4   5  -9   33.63    1.14
  -4   5  -9   32.89    1.17
   4   5   9   30.34    1.77
   4   5   9   35.24    1.48
   4  -5   9   32.48    1.20
   4   5   9   32.20    1.39
   4   5   9   30.57    1.45
  -4  -5  -9   33.55    1.45
   4  -5  10   76.32    2.03
   4   5  10   75.46    2.15
  -4   5 -10   73.98    1.90
   4   5  10   71.55    2.62
   4   5  10   74.92    2.03
   4   5  10   75.89    2.23
   4  -5  10   73.80    1.65
  -4  -5 -10   72.18    2.16
   4  -5  11  115.31    2.69
   4   5  11  111.97    3.42
   4   5  11  118.42    2.75
   4   5  11  111.12    2.45
   4   5  11  113.65    2.47
   4   5  11  113.49    2.84
  -4  -5 -11  114.65    2.80
  -4  -5 -12    4.67    0.90
   4   5  12    5.98    1.24
   4   5  12    5.77    0.90
   4   5  12    4.74    0.66
   4  -5  12    4.19    0.88
   4  -6 -13    0.82    1.16
  -4  -6  13    2.04    1.17
  -4  -6  12   41.72    2.20
  -4   6  12   39.26    1.59
   4  -6 -12   38.99    1.67
  -4   6  12   39.49    2.32
   4  -6 -11   29.47    1.93
   4   6 -11   31.43    1.29
  -4   6  11   29.93    1.42
  -4  -6  11   31.75    1.93
   4  -6 -11   33.59    1.60
  -4   6  11   35.34    2.09
  -4   6  10    0.05    1.00
   4  -6 -10    0.72    0.96
   4   6 -10    0.51    0.61
  -4   6  10    0.76    0.68
   4  -6 -10    0.51    0.76
   4   6 -10    1.43    0.64
  -4  -6  10    1.45    0.95
   4  -6  -9  468.22    7.26
   4  -6  -9  478.43    7.70
  -4  -6   9  465.34    7.46
   4   6  -9  472.78    6.97
  -4   6   9  472.42    6.72
   4   6  -9  482.15    6.52
   4  -6  -9  475.95    7.11
   4   6  -9  485.84    7.58
  -4   6   9  472.08    7.53
   4  -6  -8    5.19    0.93
  -4   6   8    4.98    0.94
   4  -6  -8    4.23    0.95
   4   6  -8    4.50    0.61
   4   6  -8    6.03    0.89
  -4   6   8    4.17    0.78
   4   6  -8    4.52    0.73
   4  -6  -8    5.44    0.88
   4   6  -8    5.06    0.95
   4   6  -7    9.17    1.11
  -4   6   7   13.18    1.13
   4   6  -7   10.64    0.82
  -4  -6   7   11.42    0.79
   4   6  -7   10.67    1.02
   4  -6  -7   10.92    1.04
  -4   6   7   13.95    1.03
   4  -6  -7   12.12    1.12
   4   6  -7    9.05    0.85
   4  -6  -7   10.69    1.15
   4   6  -6   28.44    1.53
  -4   6   6   28.47    1.42
   4   6  -6   29.02    1.20
  -4  -6   6   29.46    1.18
   4   6  -6   28.81    1.39
   4  -6  -6   28.25    1.36
  -4   6   6   30.79    1.41
   4  -6  -6   30.31    1.53
   4   6  -6   28.25    1.27
   4  -6  -6   29.30    1.59
   4  -6  -5    9.85    0.81
   4   6  -5   10.51    0.80
  -4  -6   5   10.98    0.83
   4   6  -5   10.47    0.90
   4  -6  -5   10.01    1.00
  -4   6   5    9.52    0.91
  -4   6   5    8.83    0.91
   4   6  -5    8.72    0.97
  -4   6   5   10.34    0.89
  -4   6   4    6.10    0.72
   4  -6  -4    6.94    0.69
  -4  -6   4    7.82    0.73
   4   6  -4    6.58    0.70
   4   6  -4    8.24    0.81
  -4   6   4    9.15    0.87
   4  -6  -4    8.63    0.95
  -4   6   4    6.98    0.81
   4   6  -4    6.53    0.87
  -4   6   3  631.05    7.54
   4   6  -3  625.84    7.83
  -4  -6   3  624.10    7.87
   4   6  -3  628.76    7.97
   4   6  -3  618.62    8.34
  -4  -6   3  633.60    8.44
   4  -6  -3  628.10    7.48
   4  -6  -3  640.93    8.66
  -4   6   3  632.63    8.03
   4  -6  -3  636.14    8.23
  -4   6   2 1237.80   13.13
  -4  -6   2 1225.97   13.88
   4   6  -2 1238.84   13.76
  -4  -6   2 1243.43   14.29
   4   6  -2 1248.27   14.20
   4   6  -2 1235.06   13.81
   4  -6  -2 1230.93   13.04
  -4   6   2 1266.66   14.14
   4  -6  -2 1268.00   14.69
  -4   6   2 1249.10   13.82
   4  -6  -2 1223.05   13.91
  -4   6   1  185.51    2.65
  -4  -6   1  178.67    3.54
   4   6  -1  179.41    3.30
   4   6  -1  183.20    3.29
   4  -6  -1  184.05    3.80
  -4   6   1  185.33    3.50
  -4   6   1  186.22    3.20
   4  -6  -1  180.21    3.25
  -4   6   0   10.86    0.47
  -4  -6   0   10.54    0.91
   4   6   0    9.26    0.79
  -4   6   0   10.63    0.89
   4  -6   0   10.00    0.97
  -4   6   0   12.66    0.77
   4   6   0   13.20    0.90
   4  -6   0    9.99    0.74
  -4   6  -1  319.65    3.48
  -4   6  -1  337.32    3.50
  -4  -6  -1  326.64    5.05
   4   6   1  327.29    4.89
  -4   6  -1  327.81    5.01
  -4   6  -1  326.80    4.44
   4  -6   1  326.98    4.45
  -4  -6  -2  341.59    5.21
   4   6   2  342.26    5.08
   4  -6   2  334.86    5.50
  -4   6  -2  340.71    5.15
  -4   6  -2  345.89    4.47
   4  -6   2  352.27    4.43
  -4  -6  -3  111.03    2.56
   4  -6   3  107.51    1.85
   4   6   3  108.26    2.52
  -4   6  -3  109.22    2.51
   4  -6   3  106.57    2.73
  -4   6  -3  108.90    1.91
   4   6   3  109.16    2.60
   4   6   3  114.11    2.76
  -4  -6  -4 1028.23   11.95
   4  -6   4 1015.34   10.63
   4   6   4 1011.00   11.99
  -4   6  -4 1021.78   11.82
   4  -6   4 1026.91   12.30
  -4   6  -4 1035.92   10.67
   4   6   4 1037.90   12.11
   4   6   4 1021.26   12.46
  -4   6  -5   98.37    1.27
   4   6   5  103.83    2.46
   4  -6   5  101.69    1.56
  -4  -6  -5  100.68    2.49
  -4   6  -5  103.41    2.38
   4  -6   5  107.50    2.65
   4   6   5  102.94    2.57
  -4   6  -5  105.58    1.56
   4   6   5  102.83    2.54
  -4   6  -6  324.17    3.67
   4   6   6  325.40    4.99
  -4   6  -6  324.67    4.42
  -4  -6  -6  325.08    5.06
  -4   6  -6  323.92    4.81
  -4   6  -6  303.25    3.35
   4   6   6  329.56    5.15
   4  -6   6  325.35    5.10
   4   6   6  322.05    5.12
  -4   6  -7  812.86    8.74
  -4   6  -7  851.00    9.14
   4   6   7  800.30   10.00
   4   6   7  816.69   10.19
   4  -6   7  810.10   10.04
   4   6   7  813.67   10.25
  -4  -6  -7  812.76   10.17
  -4   6  -7  822.39    9.72
  -4   6  -8   41.93    1.17
  -4   6  -8   41.77    1.44
  -4   6  -8   42.36    1.08
   4   6   8   40.89    1.63
   4  -6   8   42.46    1.56
   4   6   8   41.96    1.68
   4   6   8   41.31    1.70
  -4  -6  -8   42.26    1.72
  -4   6  -9  367.61    4.78
   4   6   9  367.59    6.48
  -4   6  -9  364.99    5.02
  -4   6  -9  349.87    3.82
   4   6   9  368.98    5.60
   4   6   9  371.47    5.62
   4  -6   9  370.52    5.21
   4   6   9  362.74    5.78
  -4  -6  -9  361.64    5.70
   4  -6   9  360.12    4.82
   4   6  10  211.28    4.80
   4  -6  10  211.20    3.49
   4   6  10  209.47    3.97
   4  -6  10  214.03    3.39
   4   6  10  210.59    3.89
  -4  -6 -10  211.32    4.11
   4   6  11   21.80    1.32
   4  -6  11   22.33    1.16
   4   6  11   21.02    1.24
   4   6  11   23.02    1.74
  -4  -6 -11   22.20    1.38
  -4  -6 -12    4.18    0.98
   4  -6  12    4.53    0.81
   4   6  12    3.93    0.73
   4  -7 -12    5.61    1.32
  -4   7  12    5.46    0.93
   4  -7 -12    6.46    0.97
  -4   7  12    5.51    1.36
   4   7 -11    0.75    0.64
  -4   7  11    1.75    0.78
   4  -7 -11    0.36    1.01
   4  -7 -11    1.01    0.84
  -4   7  11    0.72    1.07
   4  -7 -10  533.17    8.65
  -4   7  10  530.99    7.48
   4  -7 -10  540.39    7.93
  -4   7  10  523.43    8.44
   4  -7  -9   56.60    2.24
   4  -7  -9   60.34    2.51
   4   7  -9   58.82    1.62
  -4   7   9   57.78    1.98
   4  -7  -9   59.33    2.26
   4   7  -9   59.12    1.94
  -4   7   9   57.68    2.38
   4   7  -9   61.57    2.45
  -4   7   8   60.27    2.29
   4   7  -8   58.60    2.34
   4   7  -8   55.32    1.65
   4   7  -8   58.14    2.06
   4  -7  -8   54.29    2.12
  -4   7   8   58.28    2.00
   4  -7  -8   57.43    2.22
   4   7  -8   58.04    1.93
   4  -7  -8   59.33    2.41
   4   7  -7  265.81    5.18
  -4   7   7  274.59    4.98
   4   7  -7  272.42    4.29
   4   7  -7  287.64    4.82
   4  -7  -7  275.70    4.86
  -4   7   7  284.30    4.82
   4   7  -7  280.94    4.71
   4  -7  -7  284.47    5.23
   4  -7  -7  279.51    5.35
   4  -7  -6   42.55    1.68
   4   7  -6   39.83    1.63
   4   7  -6   41.95    1.49
  -4   7   6   41.16    1.68
  -4   7   6   41.48    1.77
   4   7  -6   44.79    1.69
   4  -7  -6   43.45    1.95
   4   7  -6   45.48    1.95
  -4   7   6   43.36    1.71
   4  -7  -5   70.32    1.98
   4   7  -5   66.19    1.88
   4   7  -5   69.60    2.07
  -4   7   5   70.46    2.19
  -4   7   5   69.13    2.19
   4   7  -5   67.97    2.09
   4  -7  -5   65.71    2.32
   4   7  -5   67.98    2.28
  -4   7   5   66.92    2.01
  -4   7   4    0.93    0.57
   4  -7  -4    1.13    0.53
   4  -7  -4    0.89    0.67
   4   7  -4    1.10    0.57
   4   7  -4    0.91    0.61
  -4   7   4    0.75    0.67
   4   7  -4    0.85    0.59
   4  -7  -4    0.86    0.73
  -4   7   4    1.15    0.63
   4   7  -4    1.30    0.70
  -4   7   3  208.00    3.39
   4   7  -3  203.09    3.98
   4   7  -3  205.92    3.75
   4   7  -3  203.54    3.60
   4  -7  -3  205.20    4.27
  -4   7   3  209.89    3.83
   4   7  -3  201.69    3.84
   4  -7  -3  212.18    3.98
  -4   7   2  222.36    3.35
   4   7  -2  224.25    4.13
  -4  -7   2  220.49    4.21
   4   7  -2  222.06    3.81
  -4   7   2  222.80    4.10
   4  -7  -2  218.10    4.48
   4   7  -2  221.31    4.05
  -4   7   2  220.03    3.84
   4   7  -2  217.76    3.88
   4  -7  -2  220.26    3.94
  -4   7   1  266.21    3.60
  -4  -7   1  270.06    4.72
   4   7  -1  268.58    4.31
  -4   7   1  268.35    4.60
   4  -7  -1  271.88    5.02
  -4   7   1  266.58    4.24
   4   7  -1  266.08    4.57
   4   7  -1  261.00    4.34
   4  -7  -1  266.17    4.32
  -4   7   0  315.84    3.85
  -4  -7   0  317.03    5.21
   4   7   0  316.29    4.86
  -4   7   0  318.43    5.12
  -4   7   0  312.11    4.63
   4   7   0  315.31    5.13
   4  -7   0  316.90    4.68
   4   7   0  319.64    4.95
  -4   7  -1  171.91    2.20
   4   7   1  170.82    3.31
  -4  -7  -1  171.91    3.51
  -4   7  -1  174.67    3.48
  -4   7  -1  177.89    3.04
   4   7   1  167.64    3.49
   4  -7   1  170.90    2.99
  -4   7  -2    1.28    0.16
   4   7   2    0.50    0.58
   4  -7   2    1.28    0.44
  -4   7  -2    1.40    0.64
   4  -7   2    1.13    0.71
  -4   7  -2    1.75    0.18
   4   7   3  497.50    7.28
  -4  -7  -3  494.64    7.01
   4  -7   3  505.22    6.00
   4   7   3  507.82    6.92
  -4   7  -3  502.58    6.95
   4  -7   3  501.03    7.41
  -4   7  -3  503.40    6.10
   4   7   3  508.65    7.22
   4   7   3  493.78    6.99
   4  -7   4  155.72    2.45
  -4  -7  -4  158.19    3.30
   4   7   4  162.01    3.37
  -4   7  -4  148.91    3.16
  -4   7  -4  151.14    2.46
   4   7   4  154.93    3.40
   4  -7   4  151.19    3.47
   4   7   4  156.64    3.56
   4   7   5   13.63    1.24
   4  -7   5   15.24    0.67
   4   7   5   13.88    1.06
  -4   7  -5   15.52    1.02
  -4   7  -5   14.37    0.65
   4   7   5   15.27    1.18
   4  -7   5   12.55    1.10
   4   7   5   15.75    1.16
   4   7   6  600.71    8.76
  -4   7  -6  587.48    6.25
   4   7   6  614.54    8.04
  -4  -7  -6  602.47    8.15
  -4   7  -6  590.97    7.77
   4  -7   6  601.32    8.20
   4   7   6  603.36    8.26
  -4   7  -6  598.10    6.46
   4   7   6  614.01    8.27
  -4   7  -7   18.90    0.67
   4   7   7   19.12    1.25
  -4   7  -7   19.11    0.90
  -4  -7  -7   18.93    1.25
  -4   7  -7   19.10    1.12
   4  -7   7   17.86    1.19
   4   7   7   20.20    1.31
  -4   7  -7   16.41    0.48
   4   7   7   19.87    1.33
  -4   7  -8   11.48    0.68
   4   7   8   10.27    1.02
  -4   7  -8   11.28    0.63
   4   7   8   11.90    1.14
   4  -7   8   11.37    1.00
  -4  -7  -8   12.38    1.14
   4   7   8   10.47    1.08
  -4   7  -8   10.94    0.90
   4   7   9  140.28    3.27
   4  -7   9  143.17    2.99
  -4  -7  -9  144.90    3.41
   4   7   9  143.39    3.23
  -4  -7 -10  145.33    3.45
   4   7  10  142.88    3.25
   4  -7  10  146.87    2.83
   4   7  10  139.72    3.93
   4   7  11   52.97    1.93
  -4  -7 -11   57.25    2.16
   4  -8 -12   39.91    2.35
   4  -8 -11   12.99    1.26
  -4   8  11   11.15    1.47
   4  -8 -11   12.01    1.52
   4  -8 -10   98.96    3.35
  -4   8  10   94.74    3.18
   4  -8 -10  100.93    2.99
   4  -8  -9   54.44    2.47
   4   8  -9   55.93    1.99
   4  -8  -9   54.40    2.28
  -4   8   9   51.40    2.26
   4   8  -8   13.90    1.40
  -4   8   8   13.79    1.32
   4  -8  -8   15.85    1.28
   4   8  -8   14.34    0.98
  -4   8   8   14.88    1.25
   4  -8  -8   14.55    1.35
   4   8  -8   12.61    1.13
   4  -8  -8   14.15    1.45
   4   8  -7  919.68   10.79
   4  -8  -7  916.09   11.44
  -4   8   7  903.17   11.44
   4   8  -7  912.87   11.37
   4  -8  -7  920.86   12.13
   4   8  -7  919.60   12.07
  -4   8   7  911.49   11.61
   4   8  -6  119.24    2.66
   4   8  -6  124.89    2.94
   4  -8  -6  120.63    2.86
  -4   8   6  119.17    3.03
   4  -8  -6  115.76    3.34
   4   8  -6  116.64    2.97
   4   8  -6  128.77    3.35
  -4   8   6  121.62    3.00
   4   8  -5  509.83    6.88
   4   8  -5  516.70    7.16
   4  -8  -5  501.15    6.90
  -4   8   5  510.84    7.42
   4   8  -5  499.76    7.36
  -4   8   5  518.53    7.48
   4  -8  -5  511.20    7.95
  -4   8   5  513.57    7.10
   4   8  -5  515.20    7.71
  -4   8   4   98.01    2.38
   4   8  -4   97.73    2.77
   4   8  -4   97.74    2.55
   4   8  -4   97.03    2.41
  -4   8   4   97.71    2.71
   4  -8  -4  102.61    3.07
   4   8  -4   96.91    2.66
  -4   8   4   98.99    2.69
   4  -8  -4   94.56    2.73
  -4   8   3   91.57    2.14
   4   8  -3   93.11    2.63
   4   8  -3   90.47    2.34
   4  -8  -3   89.94    2.86
   4   8  -3   89.05    2.56
  -4   8   3   89.78    2.48
   4   8  -3   91.24    2.43
   4  -8  -3   91.75    2.56
  -4   8   2   12.08    0.79
   4   8  -2   12.09    1.09
  -4  -8   2   11.46    1.14
   4   8  -2   11.46    0.96
  -4   8   2   11.61    1.08
   4   8  -2   10.24    1.04
  -4   8   2   11.45    0.97
   4  -8  -2   11.28    1.17
   4   8  -2   11.30    1.00
   4  -8  -2   10.13    1.00
  -4   8   1   11.73    0.69
  -4  -8   1   12.07    1.10
   4   8  -1   11.71    0.95
  -4   8   1   12.29    1.07
  -4   8   1   12.18    0.95
   4   8  -1   12.63    1.15
   4  -8  -1   12.38    1.21
   4  -8  -1   13.53    1.02
   4   8  -1   11.05    1.01
  -4   8   0  574.14    6.46
  -4  -8   0  567.19    8.04
   4   8   0  557.78    7.54
  -4   8   0  558.84    7.87
   4   8   0  566.84    8.02
  -4   8   0  574.11    7.42
   4  -8   0  553.20    7.32
   4   8   0  567.95    7.70
  -4   8  -1  324.32    3.86
   4   8   1  320.56    5.09
  -4  -8  -1  329.53    5.46
  -4   8  -1  317.28    5.30
   4   8   1  317.91    5.46
  -4   8  -1  314.85    4.74
   4  -8   1  322.43    4.72
  -4   8  -2    5.66    0.35
  -4   8  -2    5.73    0.66
   4   8   2    5.22    0.82
   4  -8   2    6.05    0.65
  -4   8  -2    4.98    0.85
   4  -8   2    7.09    1.01
  -4   8  -2    5.11    0.36
  -4   8  -3   95.41    1.31
   4   8   3  108.83    2.94
  -4  -8  -3  100.92    2.72
   4  -8   3  102.53    2.08
   4   8   3  104.91    2.64
  -4   8  -3  106.03    2.69
   4   8   3  101.11    2.81
  -4   8  -3  103.67    2.17
   4  -8   3   99.29    2.90
   4   8   3  109.71    2.81
  -4  -8  -4   -0.74    0.71
   4  -8   4    1.21    0.48
  -4   8  -4    0.58    0.45
   4   8   4    0.12    0.73
  -4   8  -4    0.46    0.65
   4   8   4    0.81    0.80
   4  -8   4    1.56    0.79
   4   8   4    0.50    0.81
   4   8   5   36.33    1.87
   4  -8   5   30.29    1.04
  -4  -8  -5   41.94    1.75
   4   8   5   31.10    1.51
  -4   8  -5   31.64    1.46
   4  -8   5   33.04    1.68
  -4   8  -5   31.68    1.04
   4   8   5   35.62    1.72
   4   8   5   32.93    1.62
   4   8   6   40.69    1.72
  -4   8  -6   39.36    1.60
  -4  -8  -6   38.37    1.76
   4  -8   6   37.94    1.76
   4   8   6   40.69    1.83
  -4   8  -6   38.70    1.07
   4   8   6   36.07    1.92
  -4   8  -6   38.06    0.76
   4   8   7   34.58    1.64
  -4  -8  -7   38.08    1.78
  -4   8  -7   35.00    1.51
   4   8   7   32.72    1.74
   4  -8   7   34.01    1.65
  -4   8  -7   34.94    0.84
   4   8   7   34.05    1.91
  -4   8  -8   41.70    1.62
   4   8   8   41.08    1.90
   4  -8   8   45.53    1.82
  -4   8  -8   44.29    1.29
  -4  -8  -8   40.53    1.90
  -4  -8  -9  287.66    5.28
   4  -8   9  289.84    4.79
   4  -8  10   47.41    1.65
  -4  -8 -10   43.10    2.02
  -4  -8 -11   70.65    2.51
   4  -9 -11    1.34    0.99
   4  -9 -11    1.89    1.15
   4  -9 -10    1.45    0.92
  -4   9  10    2.24    1.12
   4  -9 -10    2.93    1.25
   4  -9  -9    0.42    0.96
  -4   9   9    1.69    0.98
   4  -9  -9    1.85    1.11
  -4   9   8   40.86    1.95
   4   9  -8   42.73    1.58
   4  -9  -8   44.56    2.16
   4   9  -8   43.24    1.90
   4  -9  -8   39.94    2.16
   4  -9  -7   10.86    1.35
   4   9  -7   12.59    1.21
  -4   9   7   11.03    1.20
   4   9  -7   13.62    1.06
   4   9  -6  134.37    2.95
   4  -9  -6  138.52    3.76
   4   9  -6  133.75    3.36
  -4   9   6  132.92    3.22
   4   9  -6  136.46    3.57
   4   9  -5   68.91    2.47
   4   9  -5   69.08    2.08
  -4   9   5   66.38    2.13
   4  -9  -5   71.94    2.68
   4   9  -5   68.12    2.38
   4  -9  -5   68.46    2.51
   4  -9  -4    5.50    1.04
   4   9  -4    5.07    0.81
  -4   9   4    4.97    0.75
   4   9  -4    5.79    1.05
   4   9  -4    5.46    1.00
  -4   9   4    3.27    0.87
   4  -9  -4    5.99    1.12
  -4  -9   4    6.73    1.13
  -4   9   3  349.27    5.08
   4   9  -3  344.71    5.84
   4   9  -3  337.86    5.36
   4  -9  -3  352.45    6.40
  -4   9   3  342.56    5.62
   4   9  -3  339.50    5.86
   4   9  -3  341.49    5.54
   4  -9  -3  346.26    5.76
  -4   9   2  120.77    2.46
   4   9  -2  124.84    2.86
   4   9  -2  120.12    3.10
  -4   9   2  127.27    3.21
   4  -9  -2  120.88    3.49
  -4   9   2  120.32    2.93
   4   9  -2  121.83    3.20
   4  -9  -2  119.73    3.00
   4   9  -2  121.42    2.96
   4  -9  -1    0.59    0.70
  -4   9   1    1.89    0.72
   4   9  -1    0.96    0.70
  -4   9   1    0.93    0.75
  -4   9   1    1.84    0.49
   4   9  -1    1.30    0.79
   4  -9  -1    0.70    0.88
  -4  -9   1    1.96    0.87
   4   9  -1    1.87    0.77
   4   9   0  208.72    3.97
  -4  -9   0  209.19    4.37
  -4   9   0  214.24    3.13
  -4   9   0  206.82    4.23
   4   9   0  216.60    4.45
  -4   9   0  204.75    3.84
   4   9   0  213.44    4.14
   4  -9   0  210.33    3.83
   4   9   1  133.88    3.10
  -4  -9  -1  138.90    3.43
  -4   9  -1  143.10    2.21
  -4   9  -1  139.86    3.34
  -4   9  -1  135.28    2.90
   4   9   1  136.77    3.48
   4   9   1  133.33    3.21
   4  -9   1  136.65    2.84
  -4   9  -2  250.15    3.29
   4   9   2  263.78    4.65
  -4  -9  -2  260.89    4.92
  -4   9  -2  260.01    3.24
  -4   9  -2  267.25    4.81
   4  -9   2  273.87    5.31
  -4   9  -2  259.83    4.22
   4  -9   2  266.45    4.15
   4   9   3  456.65    6.76
   4  -9   3  461.13    5.99
  -4  -9  -3  448.12    6.97
   4   9   3  435.18    7.14
  -4   9  -3  449.81    6.84
   4  -9   3  447.56    7.34
  -4   9  -3  469.91    6.12
  -4   9  -3  450.85    4.98
  -4  -9  -4   38.81    1.83
   4  -9   4   40.93    1.36
   4   9   4   41.38    2.01
  -4   9  -4   41.68    1.79
   4  -9   4   41.31    1.98
  -4   9  -4   41.55    1.37
  -4   9  -4   37.23    0.74
  -4   9  -5   40.58    1.76
   4   9   5   39.29    2.03
  -4   9  -5   36.77    0.68
   4  -9   5   39.71    1.92
  -4   9  -5   40.48    1.30
  -4  -9  -5   40.81    1.88
   4  -9   5   41.42    1.33
  -4   9  -6   58.72    2.05
   4   9   6   61.43    2.52
   4  -9   6   62.86    2.33
  -4  -9  -6   60.07    2.25
   4  -9   6   60.87    1.53
  -4   9  -7   25.37    1.41
  -4  -9  -7   26.36    1.60
   4   9   7   23.79    1.74
   4  -9   7   27.23    1.59
  -4  -9  -8   59.40    2.32
   4   9   8   61.66    2.66
   4  -9   8   63.61    2.22
   4  -9   9    0.52    0.74
  -4  -9  -9   -0.10    0.94
  -4  -9 -10  217.29    4.64
   4 -10 -10    0.50    1.03
   4 -10 -10    1.31    1.18
  -4  10  10   -0.24    1.10
   4 -10  -9   45.78    2.30
  -4  10   9   43.77    2.21
   4 -10  -9   47.45    2.44
  -4  10   8   41.44    2.04
   4 -10  -8   40.42    2.17
   4  10  -7   21.61    1.29
   4 -10  -7   23.04    1.73
  -4  10   7   22.04    1.48
  -4  10   6   17.29    1.35
   4 -10  -6   15.56    1.58
   4 -10  -6   16.96    1.57
   4  10  -6   14.60    1.18
  -4  10   5  470.94    6.88
   4  10  -5  460.48    6.69
   4 -10  -5  475.46    7.99
   4 -10  -5  458.18    7.48
  -4  10   4  203.46    3.81
   4  10  -4  204.04    3.91
   4  10  -4  196.83    4.36
  -4 -10   4  193.40    4.50
   4 -10  -4  196.30    4.75
   4 -10  -4  201.20    4.37
  -4  10   3  122.34    2.72
   4  10  -3  122.34    2.92
   4  10  -3  119.52    3.26
   4 -10  -3  121.22    3.65
   4 -10  -3  128.94    3.30
  -4  10   2   20.12    1.07
   4  10  -2   19.49    1.28
   4  10  -2   21.40    1.47
   4 -10  -2   19.04    1.63
  -4  10   2   19.48    1.32
   4 -10  -2   19.36    1.37
  -4  10   1   25.61    1.10
   4  10  -1   26.18    1.45
  -4 -10   1   23.66    1.62
   4 -10  -1   25.50    1.76
  -4  10   1   26.49    1.47
   4 -10  -1   24.56    1.42
  -4  10   0  188.77    3.03
   4  10   0  184.00    3.83
  -4 -10   0  188.25    4.26
  -4  10   0  192.23    3.79
   4 -10   0  187.83    3.69
  -4  10  -1  426.25    5.18
   4  10   1  419.53    6.45
  -4  10  -1  408.54    5.16
  -4 -10  -1  429.39    6.98
  -4  10  -1  422.26    6.19
   4 -10   1  421.17    6.12
   4 -10   2   39.98    1.54
  -4 -10  -2   40.65    1.97
  -4  10  -2   41.95    1.11
   4 -10   2   43.56    2.16
  -4  10  -2   44.19    1.64
  -4  10  -2   42.54    1.08
   4  10   2   37.17    1.95
   4 -10   3  108.68    2.48
  -4 -10  -3  111.01    3.15
  -4  10  -3  108.03    1.79
  -4  10  -3  111.66    1.73
   4  10   3  111.04    3.24
   4 -10   3  107.49    3.33
  -4  10  -3  113.97    2.57
   4 -10   4   37.26    1.43
  -4 -10  -4   35.03    1.91
   4  10   4   40.90    2.08
   4 -10   4   38.25    2.02
  -4  10  -4   35.97    1.40
  -4 -10  -5  344.50    6.10
   4 -10   5  348.91    5.00
   4  10   5  340.56    6.42
   4 -10   5  350.13    6.30
   4 -10   6   13.47    0.89
  -4 -10  -6   11.28    1.28
   4  10   6   12.65    1.44
   4 -10   6   13.73    1.36
  -4 -10  -7   40.49    2.06
   4  10   7   44.32    2.36
   4 -10   7   40.55    1.97
  -4 -10  -8   72.60    2.69
   4 -10   8   79.18    2.58
  -4 -10  -9   16.67    1.54
   4 -10   9   17.49    1.32
   4 -11  -8    0.87    1.07
  -4  11   8    1.13    1.03
   4 -11  -7   35.33    2.21
  -4  11   7   34.15    1.84
   4  11  -6  335.26    5.52
  -4  11   6  330.79    5.76
   4 -11  -6  337.53    6.67
   4 -11  -6  343.97    6.40
   4  11  -5  278.19    4.95
  -4 -11   5  287.80    5.79
  -4  11   5  283.74    5.03
   4 -11  -5  296.71    6.15
   4 -11  -5  284.58    5.60
  -4 -11   4   11.26    1.40
  -4  11   4   12.39    1.06
   4 -11  -4   11.95    1.52
   4 -11  -4   13.52    1.36
  -4 -11   3    0.44    0.99
  -4  11   3    0.39    0.68
   4 -11  -3    0.65    0.87
   4 -11  -3    0.25    1.10
  -4  11   2   54.20    1.73
   4 -11  -2   56.64    2.64
   4 -11  -2   54.08    2.12
   4 -11  -1    3.34    1.15
   4 -11  -1    4.87    0.96
  -4  11   1    3.72    0.66
   4 -11   0    9.27    1.07
  -4 -11   0    9.18    1.29
  -4  11   0    9.94    0.77
   4 -11   1  221.96    5.16
  -4  11  -1  224.67    4.23
  -4 -11  -1  229.46    4.94
   4 -11   1  227.82    4.21
  -4  11  -1  229.29    3.40
   4 -11   2  231.57    5.22
  -4  11  -2  227.17    4.20
  -4 -11  -2  224.91    4.89
   4 -11   2  229.88    4.12
   4  11   2  233.15    4.96
  -4  11  -3   62.74    2.01
   4 -11   3   62.30    2.63
   4 -11   3   61.73    1.95
  -4 -11  -3   60.31    2.48
   4  11   3   66.88    2.64
   4 -11   4    7.67    1.22
   4 -11   4    6.70    0.88
  -4 -11  -4    7.69    1.27
   4  11   4    6.88    1.29
   4 -11   5    1.28    0.98
  -4 -11  -5    0.31    0.97
   4 -11   5    0.15    0.63
   4  11   5    0.18    1.00
   4 -11   6   49.83    2.31
  -4 -11  -6   50.61    2.33
   4 -11   6   50.84    1.65
   4  11   6   50.41    2.49
   4 -11   7   48.91    2.21
  -4 -11  -7   50.09    2.32
  -4  12   7    2.26    1.03
   4 -12  -7    1.93    1.17
   4 -12  -7    1.60    1.21
  -4  12   6   64.24    2.40
   4 -12  -6   66.47    2.95
   4 -12  -6   67.40    2.75
  -4 -12   5  627.37    9.73
  -4  12   5  623.41    8.73
   4 -12  -5  630.03   10.17
   4 -12  -5  627.54    9.51
  -4 -12   4  180.28    4.53
  -4  12   4  180.63    3.73
   4 -12  -4  174.06    4.73
   4 -12  -4  182.04    4.35
  -4 -12   3   63.04    2.68
  -4  12   3   63.26    2.06
   4 -12  -3   59.05    2.81
   4 -12  -3   62.85    2.44
   4 -12  -2   11.03    1.55
  -4 -12   2    9.88    1.33
   4 -12  -2    8.79    1.13
  -4  12   2    9.65    0.93
   4 -12  -1    2.49    0.93
   4 -12  -1    3.67    1.26
   4 -12   0   87.18    2.66
   4 -12   1  127.56    3.92
  -4 -12  -1  118.89    3.62
   4 -12   1  122.96    3.07
   4  12   1  129.14    3.62
   4 -12   2   30.04    2.07
  -4 -12  -2   28.90    1.92
   4 -12   2   31.31    1.57
   4  12   2   27.58    1.86
   4 -12   3   58.22    2.62
   4 -12   3   55.46    1.97
  -4 -12  -3   54.48    2.48
   4  12   3   53.37    2.50
   4 -12   4   99.99    3.37
  -4 -12  -4   96.39    3.23
   4 -12   4   96.26    2.57
   4  12   4   91.86    3.30
  -4 -12  -5    1.14    1.03
   4 -12   5   -0.13    0.74
   4 -12   5    0.88    1.06
  -4 -12  -6   36.01    2.10
   4 -12   6   35.27    1.50
   4 -12   6   38.53    2.09
  -4 -13   4   39.15    2.32
   4 -13  -4   37.58    2.08
   4 -13  -4   39.60    2.49
  -4 -13   3   15.21    1.72
   4 -13  -3   16.43    1.51
   4 -13  -3   17.79    1.84
  -4 -13   2   20.56    1.83
   4 -13  -2   23.64    1.68
   4 -13  -2   19.34    1.93
   4 -13  -1  278.89    5.30
   4 -13  -1  283.78    6.33
   4 -13   0   69.62    2.50
   4 -13   1    3.82    1.41
   4  13   1    1.62    1.11
  -4 -13  -1    2.11    1.17
   4 -13   1    2.82    0.98
  -4 -13  -2   10.35    1.51
   4 -13   2   11.60    1.18
   4 -13   2   12.77    1.59
   4 -13   3   19.16    1.38
   4 -13   3   21.35    1.87
   5   0 -14   25.32    1.82
  -5   0  14   24.67    1.08
  -5   0  13   -0.12    0.56
   5   0 -13   -0.16    0.95
  -5   0  13   -0.27    1.11
   5   0 -12  449.46    5.78
   5   0 -12  450.57    7.48
  -5   0  12  463.85    8.09
   5   0 -11    0.69    0.49
  -5   0  11   -0.30    0.58
   5   0 -11   -0.10    0.86
  -5   0  11   -0.06    0.92
   5   0 -10  401.92    5.50
   5   0 -10  419.80    6.77
  -5   0  10  416.95    7.14
   5   0 -10  417.71    6.70
  -5   0   9   -0.25    0.82
  -5   0   9   -0.03    0.58
   5   0  -9    0.48    0.50
  -5   0   8  471.55    7.37
  -5   0   8  487.80    6.48
   5   0  -8  485.83    6.28
   5   0  -7    0.33    0.47
  -5   0   7   -0.05    0.55
  -5   0   7   -0.04    0.70
   5   0  -6 2844.05   29.17
  -5   0   6 2880.76   29.28
  -5   0   6 2879.85   29.98
   5   0  -5    0.05    0.43
  -5   0   5    0.90    0.47
  -5   0   5    0.25    0.45
  -5   0   5    0.44    0.53
   5   0  -4 1940.57   20.51
  -5   0   4 1937.04   20.39
  -5   0   4 1980.51   20.65
  -5   0   3    0.45    0.42
   5   0  -3    0.79    0.47
   5   0  -3    0.36    0.44
   5   0  -2   86.29    2.06
  -5   0   2   83.86    1.99
  -5   0   2   86.89    1.86
   5   0  -2   87.23    1.92
  -5   0   2   85.29    2.03
   5   0  -1    0.39    0.41
   5   0  -1    0.76    0.35
  -5   0   1    0.29    0.41
  -5   0   1    0.54    0.42
  -5   0   0 9999.00   96.75
   5   0   1    2.42    0.34
  -5   0  -1    7.07    0.61
   5   0   2 1818.44   18.10
  -5   0  -2 1804.45   18.98
   5   0   3    0.43    0.43
   5   0   3    0.49    0.31
   5   0   3    1.22    0.25
   5   0   3    0.54    0.39
  -5   0  -3    0.76    0.38
  -5   0  -4  325.29    4.52
   5   0   4  329.36    4.70
   5   0   4  322.27    3.76
   5   0   4  332.20    4.41
  -5   0  -5    0.06    0.35
   5   0   5    0.35    0.40
   5   0   5    0.36    0.40
   5   0   5    0.83    0.24
   5   0   5    1.49    0.44
  -5   0  -6   78.18    1.74
   5   0   6   78.69    1.87
   5   0   6   80.78    1.90
  -5   0  -6   77.13    1.25
   5   0   6   78.09    1.24
   5   0   6   77.48    1.89
   5   0   7    0.09    0.44
  -5   0  -7    0.58    0.24
   5   0   7    0.40    0.51
  -5   0  -7    0.02    0.41
   5   0   7    0.05    0.43
  -5   0  -8    5.88    0.36
   5   0   8    5.18    0.74
   5   0   8    5.44    0.61
  -5   0  -8    6.44    0.62
   5   0   9    0.46    0.42
  -5   0  -9    0.92    0.28
   5   0   9   -0.30    0.63
   5   0   9    0.53    0.48
   5   0  10  203.33    2.87
   5   0  10  199.50    3.93
   5   0  11    0.28    0.31
   5   0  11    0.31    0.30
   5   0  11    0.21    0.79
   5   0  12    8.61    1.19
   5   0  13    0.20    0.98
  -5  -1  14    6.25    0.59
   5   1 -14    6.53    1.25
   5  -1 -14    6.18    1.32
  -5   1  14    7.53    0.82
  -5   1  13    7.08    1.39
  -5   1  13    8.58    0.90
  -5  -1  13    7.75    0.71
   5   1 -13    7.92    1.27
   5  -1 -13    6.14    1.20
  -5   1  12   56.13    1.80
  -5  -1  12   56.74    1.60
   5  -1 -12   60.48    1.65
   5   1 -12   56.74    1.46
   5   1 -12   58.18    2.37
   5  -1 -12   58.99    2.43
  -5  -1  12   57.98    2.66
  -5   1  12   51.20    2.53
  -5  -1  11  149.83    2.78
   5  -1 -11  145.80    2.78
   5   1 -11  141.58    2.59
  -5   1  11  147.99    3.04
   5  -1 -11  142.83    3.71
  -5  -1  11  144.37    4.00
  -5   1  11  144.36    3.97
  -5  -1  10   35.38    1.33
   5   1 -10   34.13    1.24
   5  -1 -10   35.62    1.34
  -5   1  10   36.05    1.47
  -5  -1  10   35.75    1.99
   5   1 -10   36.70    1.81
  -5   1  10   36.11    1.95
  -5  -1   9  495.72    6.49
   5  -1  -9  494.09    6.47
   5   1  -9  492.05    6.34
  -5   1   9  483.11    6.68
   5  -1  -9  479.29    7.43
  -5  -1   9  486.35    7.76
  -5   1   9  499.64    7.78
  -5  -1   8  853.17    9.81
   5  -1  -8  829.40    9.74
  -5   1   8  817.34    9.98
   5   1  -8  836.58    9.71
  -5   1   8  824.78    9.68
   5  -1  -8  818.12   10.62
  -5  -1   8  831.81   10.97
   5   1  -8  824.46   10.66
  -5   1   8  817.14   10.86
  -5   1   7   26.36    1.22
   5   1  -7   27.68    1.18
  -5   1   7   26.26    1.17
  -5  -1   7   26.29    1.46
  -5   1   7   27.02    1.48
  -5  -1   7   28.85    1.21
   5  -1  -7   26.34    1.17
  -5   1   6  671.29    8.61
   5   1  -6  694.70    8.48
  -5   1   6  690.50    8.46
  -5   1   6  726.83    9.15
   5  -1  -6  685.99    8.78
  -5  -1   6  711.88    9.16
  -5  -1   6  724.54    8.53
   5  -1  -6  691.10    8.45
  -5   1   5  226.50    3.78
  -5   1   5  234.77    3.91
   5   1  -5  240.39    3.87
   5  -1  -5  237.61    3.82
   5  -1  -5  239.82    3.96
  -5   1   5  239.22    4.08
  -5  -1   5  240.53    4.14
  -5  -1   5  234.32    3.79
   5   1  -4   29.82    1.21
  -5   1   4   28.85    1.18
  -5  -1   4   28.03    1.22
   5  -1  -4   30.40    1.21
  -5   1   4   32.71    1.29
   5  -1  -4   32.16    1.23
  -5  -1   4   29.87    1.18
   5  -1  -3 3645.07   37.01
  -5  -1   3 3697.09   36.96
   5  -1  -3 3701.62   36.75
  -5   1   3 3733.74   36.81
   5   1  -3 3653.02   37.07
  -5   1   2  926.78   10.26
  -5  -1   2  918.64   10.66
   5  -1  -2  947.53   10.34
   5  -1  -2  948.91   10.79
   5   1  -2  932.45   10.83
   5   1  -2  939.62   10.68
  -5   1   2  935.64   10.71
  -5   1   2  934.47   10.76
   5   1  -1   18.97    0.87
  -5  -1   1   16.14    0.89
   5  -1  -1   16.09    0.72
   5   1  -1   17.06    0.91
  -5   1   1   17.03    0.91
   5   1  -1   17.16    0.94
   5  -1  -1   17.27    0.94
  -5   1   1   15.61    0.88
   5   1   0 1600.19   16.40
   5   1   0 1575.45   16.30
  -5   1   0 1572.05   16.78
  -5  -1   0 1559.27   16.71
   5  -1   0 1567.35   15.99
   5  -1   0 1554.29   16.82
   5   1   0 1547.35   16.90
  -5   1   0 1533.92   16.76
   5   1   0 1625.52   16.83
   5   1   1  164.54    2.51
   5  -1   1  153.75    2.27
  -5   1  -1  162.81    2.92
  -5  -1  -1  161.71    2.87
  -5   1  -1  153.17    2.85
   5   1   2    2.63    0.34
   5  -1   2    1.35    0.25
  -5   1  -2    1.28    0.41
  -5   1  -2    2.62    0.47
  -5  -1  -2    1.25    0.42
   5   1   3  303.81    4.48
  -5  -1  -3  304.48    4.32
  -5   1  -3  294.02    4.31
   5  -1   3  292.70    4.41
   5   1   3  307.54    4.55
  -5   1  -3  297.68    4.38
  -5  -1  -3  303.85    3.93
   5  -1   3  308.70    3.38
   5  -1   3  299.93    3.78
   5   1   3  301.52    4.20
   5   1   3  304.05    3.77
   5   1   4   90.41    2.08
  -5   1  -4   92.76    1.99
  -5  -1  -4   88.65    1.95
  -5   1  -4   95.52    2.08
   5   1   4   91.34    2.13
  -5  -1  -4   94.73    1.71
   5  -1   4   88.06    2.04
   5  -1   4   92.68    1.73
   5   1   4   93.42    2.03
   5   1   4   92.11    1.62
   5  -1   4   88.85    1.17
   5   1   5   25.12    1.09
  -5  -1  -5   19.36    0.90
  -5   1  -5   20.40    0.90
   5   1   5   23.18    1.06
  -5  -1  -5   21.85    0.76
   5  -1   5   18.93    0.94
   5   1   5   21.71    1.02
   5  -1   5   19.40    0.82
   5   1   6   75.08    1.90
  -5  -1  -6   72.43    1.73
  -5   1  -6   75.01    1.66
   5   1   6   75.03    1.88
  -5  -1  -6   76.29    1.47
   5  -1   6   73.37    1.79
   5   1   6   73.53    1.46
   5  -1   6   72.07    1.70
   5   1   6   75.45    1.97
   5   1   7  766.23    8.90
  -5  -1  -7  732.28    8.62
  -5   1  -7  748.28    8.33
   5   1   7  737.45    8.75
  -5  -1  -7  745.21    8.05
   5  -1   7  744.89    8.57
   5   1   7  730.71    8.07
   5   1   7  739.46    9.19
   5  -1   7  727.34    8.72
  -5  -1  -8    1.14    0.53
  -5   1  -8    1.09    0.42
   5   1   8    0.42    0.49
   5   1   8    0.63    0.45
   5  -1   8    0.84    0.42
   5   1   8    1.20    0.35
   5  -1   8    0.82    0.55
   5   1   8    1.66    0.66
   5   1   9  160.79    2.96
  -5   1  -9  163.03    2.64
   5   1   9  165.19    2.76
   5  -1   9  167.52    2.69
   5  -1   9  167.54    3.28
   5   1   9  158.13    3.44
  -5  -1  -9  166.32    2.47
   5   1  10   68.96    2.28
   5   1  10   67.53    1.78
  -5  -1 -10   68.45    1.44
   5   1  10   69.01    1.50
   5  -1  10   70.54    2.18
   5  -1  10   69.10    1.46
   5   1  10   69.67    1.54
   5   1  11   92.63    2.04
   5   1  11   90.40    1.61
   5  -1  11   85.04    1.27
   5  -1  11   92.71    2.66
   5   1  11   95.11    2.78
   5   1  11   92.99    1.60
   5   1  12   11.22    1.23
   5  -1  12   14.60    1.30
   5   1  13  265.78    5.38
   5  -1  13  271.22    5.23
   5  -2 -14   85.11    3.12
   5   2 -14   83.62    2.97
  -5   2  14   84.36    2.29
  -5   2  13  109.94    2.65
  -5  -2  13  102.49    1.91
   5   2 -13  109.08    3.31
   5  -2 -13  106.81    3.40
  -5   2  13  111.54    3.77
  -5   2  12    1.70    0.74
  -5  -2  12    1.76    0.52
   5   2 -12    2.55    0.51
   5  -2 -12    2.43    1.00
   5  -2 -12    1.53    0.61
  -5   2  12    4.20    1.21
  -5   2  11    6.74    1.28
  -5  -2  11    7.09    1.25
  -5  -2  11    7.03    0.70
   5   2 -11    6.95    0.68
   5  -2 -11    5.75    0.74
   5  -2 -11    5.33    1.12
  -5   2  10   21.21    1.08
  -5  -2  10   21.51    1.03
   5  -2 -10   22.44    1.16
   5   2 -10   19.83    1.00
   5  -2 -10   21.84    1.55
  -5  -2  10   21.44    1.61
   5   2 -10   22.26    1.54
  -5   2  10   23.50    1.67
  -5   2   9  257.60    4.09
   5   2  -9  252.58    3.97
  -5  -2   9  258.52    3.94
   5  -2  -9  258.50    4.20
   5  -2  -9  245.80    4.82
  -5  -2   9  261.12    5.16
  -5   2   9  255.02    5.12
   5   2  -9  253.59    4.91
   5  -2  -8  132.61    3.09
   5   2  -8  133.56    2.69
  -5   2   8  136.94    2.75
  -5  -2   8  136.06    2.64
   5  -2  -8  137.13    2.81
   5  -2  -8  130.35    3.24
   5   2  -8  133.89    3.32
  -5   2   8  138.04    3.43
  -5  -2   8  136.09    3.43
   5  -2  -7   16.96    1.11
  -5  -2   7   15.79    0.91
   5   2  -7   18.96    1.00
  -5   2   7   17.89    0.99
   5  -2  -7   17.16    1.03
   5  -2  -7   18.06    1.22
  -5  -2   7   17.37    1.24
   5   2  -7   16.45    1.24
  -5   2   7   17.09    1.25
  -5  -2   6  564.67    7.11
  -5   2   6  567.72    7.25
   5   2  -6  579.75    7.31
  -5  -2   6  578.53    7.89
   5  -2  -6  547.96    7.25
   5  -2  -6  566.76    7.71
   5  -2  -6  560.20    7.41
  -5   2   6  563.51    7.78
   5   2  -6  564.97    7.84
   5   2  -5  267.81    4.22
  -5   2   5  257.80    4.15
  -5  -2   5  261.98    4.45
   5  -2  -5  261.64    4.17
   5  -2  -5  256.34    4.38
  -5   2   5  264.04    4.37
   5  -2  -5  256.12    4.13
   5   2  -4  181.31    3.14
  -5   2   4  167.92    3.16
   5   2  -4  170.18    3.23
  -5  -2   4  174.63    3.31
  -5  -2   4  181.34    3.14
  -5   2   4  174.05    3.17
   5  -2  -4  178.59    3.06
   5  -2  -4  181.19    3.24
   5  -2  -3   33.72    1.13
  -5   2   3   32.28    1.17
   5   2  -3   36.12    1.36
   5   2  -3   31.34    1.23
   5  -2  -3   32.89    1.27
   5   2  -2  284.13    4.41
  -5   2   2  271.14    4.26
   5  -2  -2  272.61    4.26
   5   2  -2  287.22    4.28
   5  -2  -2  275.69    3.77
  -5   2   2  275.90    3.83
  -5   2   1   35.56    1.31
   5   2  -1   35.68    1.35
  -5   2   1   33.82    0.93
   5  -2  -1   34.55    1.29
   5   2  -1   33.02    1.26
  -5  -2   1   36.09    1.25
   5  -2  -1   32.69    0.94
   5   2   0  728.39    8.84
  -5   2   0  721.18    8.70
   5   2   0  727.46    8.32
   5  -2   0  719.71    8.72
  -5  -2   0  719.49    8.55
   5   2   0  739.16    8.73
   5  -2   0  731.46    7.72
  -5   2  -1   16.45    0.89
  -5   2  -1   15.97    0.87
   5   2   1   14.88    0.88
  -5  -2  -1   17.28    0.89
  -5  -2  -1   14.98    0.77
   5   2   1   15.96    0.75
   5  -2   1   13.95    0.59
   5  -2   1   14.67    0.50
  -5   2  -2  497.48    6.37
  -5  -2  -2  501.04    6.30
  -5   2  -2  499.40    6.42
   5   2   2  509.33    5.88
  -5  -2  -2  491.43    6.08
   5  -2   2  487.02    5.26
   5  -2   2  494.55    5.39
   5  -2   2  490.75    5.25
   5   2   3    1.82    0.49
  -5  -2  -3    0.99    0.41
   5   2   3    1.40    0.50
  -5   2  -3    1.51    0.43
  -5   2  -3    1.55    0.45
   5  -2   3    2.25    0.18
  -5  -2  -3    2.56    0.41
   5   2   3    2.23    0.39
   5  -2   3    1.37    0.45
   5  -2   3    1.25    0.23
   5  -2   3    1.22    0.17
   5   2   4    2.69    0.55
  -5   2  -4    2.30    0.47
   5   2   4    2.11    0.54
  -5   2  -4    1.69    0.45
  -5  -2  -4    2.83    0.43
   5  -2   4    2.14    0.46
   5   2   4    2.26    0.53
   5  -2   4    1.73    0.28
   5   2   4    2.35    0.40
   5   2   5  157.19    2.96
  -5  -2  -5  155.45    2.79
  -5   2  -5  146.28    2.64
   5   2   5  149.22    2.95
  -5   2  -5  145.70    2.75
  -5  -2  -5  161.04    2.58
   5  -2   5  156.21    2.82
   5   2   5  159.19    2.56
   5   2   5  148.23    2.96
   5  -2   5  151.51    2.33
   5   2   6  173.97    3.36
   5   2   6  169.79    3.17
  -5   2  -6  170.06    2.79
  -5  -2  -6  170.07    3.04
   5   2   6  171.51    3.15
  -5   2  -6  175.04    2.99
  -5  -2  -6  178.34    2.76
   5  -2   6  176.83    3.01
   5   2   6  173.30    2.79
   5  -2   6  168.94    2.71
   5   2   7   71.17    2.11
   5   2   7   70.30    1.90
  -5   2  -7   72.10    1.57
  -5  -2  -7   69.65    1.85
   5   2   7   69.52    1.85
  -5  -2  -7   70.47    1.58
   5  -2   7   71.26    1.75
   5   2   7   72.38    1.65
   5  -2   7   72.57    1.74
   5   2   8   37.32    1.63
   5   2   8   37.87    1.41
  -5   2  -8   37.79    1.06
   5   2   8   37.28    1.33
  -5  -2  -8   39.93    1.18
   5  -2   8   37.59    1.22
   5   2   8   37.39    1.18
   5  -2   8   36.37    1.34
   5  -2   9    3.44    0.69
  -5   2  -9    3.51    0.45
   5   2   9    3.80    0.66
   5   2   9    3.08    0.58
   5  -2   9    3.60    0.53
   5   2   9    3.01    0.54
   5   2   9    2.94    0.83
  -5   2 -10   50.24    1.67
   5   2  10   50.23    2.01
   5   2  10   53.01    1.67
   5   2  10   51.47    1.42
   5  -2  10   50.26    1.26
   5  -2  10   54.73    1.86
   5   2  10   48.82    1.37
  -5  -2 -10   51.00    1.39
  -5   2 -11   49.41    1.74
   5   2  11   50.57    2.11
  -5  -2 -11   48.41    1.39
   5   2  11   52.08    1.29
   5   2  11   52.93    1.65
   5   2  11   51.12    1.31
   5  -2  11   53.09    1.97
   5   2  12   15.01    0.96
   5   2  12   13.25    0.53
   5   2  12   15.17    1.42
   5  -2  12   14.38    1.25
   5  -2  13    1.15    0.94
   5   2  13    1.36    1.08
   5   3 -14   51.80    2.38
   5  -3 -14   51.02    2.53
  -5   3  14   55.57    1.95
   5  -3 -13  124.56    3.73
  -5   3  13  127.90    4.03
  -5  -3  13  126.77    1.98
  -5   3  12  172.10    3.10
  -5  -3  12  177.52    2.68
   5  -3 -12  171.77    4.31
   5  -3 -12  168.02    3.26
  -5   3  12  174.90    4.62
  -5   3  11  182.78    3.33
  -5  -3  11  190.52    2.92
   5  -3 -11  180.97    3.50
   5   3 -11  184.45    3.12
   5  -3 -11  189.63    4.41
  -5   3  11  179.97    4.56
   5  -3 -10   31.09    1.69
  -5  -3  10   28.16    1.07
  -5   3  10   29.74    1.30
   5   3 -10   29.13    1.23
   5  -3 -10   30.35    1.40
   5  -3 -10   28.56    1.76
  -5   3  10   31.53    1.88
   5   3 -10   30.87    1.81
   5  -3  -9  501.25    7.37
  -5  -3   9  507.89    6.26
  -5   3   9  496.41    6.66
   5   3  -9  488.98    6.54
  -5  -3   9  496.84    7.82
   5  -3  -9  494.50    6.86
   5  -3  -9  501.66    7.66
   5   3  -9  500.10    7.70
  -5   3   9  487.57    7.78
   5  -3  -8   72.94    2.27
  -5  -3   8   73.67    1.80
   5   3  -8   71.67    1.97
  -5   3   8   75.24    2.04
  -5  -3   8   74.44    2.53
   5  -3  -8   76.59    2.13
   5  -3  -8   73.04    2.41
   5   3  -8   76.26    2.50
  -5   3   8   76.48    2.51
   5  -3  -7  761.51    9.58
  -5  -3   7  790.88    8.97
   5   3  -7  751.72    9.26
  -5   3   7  764.67    9.34
   5   3  -7  755.80    9.66
  -5  -3   7  758.91   10.04
   5  -3  -7  752.22    9.46
   5  -3  -7  750.75    9.96
   5   3  -7  764.06   10.09
  -5   3   7  766.65   10.00
   5  -3  -6  329.29    5.00
  -5  -3   6  319.61    4.62
   5   3  -6  330.62    4.98
  -5   3   6  324.03    4.92
   5   3  -6  318.96    5.13
   5  -3  -6  319.48    5.00
   5  -3  -6  334.36    5.35
   5   3  -6  336.34    5.53
  -5   3   6  316.71    5.25
  -5  -3   5   64.71    1.71
   5   3  -5   61.68    1.85
   5   3  -5   60.63    1.70
  -5   3   5   67.41    1.89
   5   3  -5   63.34    1.93
  -5  -3   5   66.61    2.05
   5  -3  -5   62.38    1.88
   5  -3  -5   64.26    1.78
   5   3  -5   62.31    2.05
  -5   3   5   59.74    1.87
   5   3  -4 1677.77   17.62
  -5  -3   4 1644.52   17.45
   5   3  -4 1639.67   17.86
  -5   3   4 1625.98   17.81
   5  -3  -4 1661.03   17.89
   5   3  -4 1642.87   17.82
   5  -3  -4 1687.08   17.36
   5   3  -4 1634.17   18.13
  -5   3   4 1593.17   17.61
   5   3  -3  252.74    4.01
   5   3  -3  248.88    4.07
   5  -3  -3  257.73    4.19
  -5   3   3  256.69    3.83
   5  -3  -3  257.71    3.65
   5  -3  -2  317.74    4.08
   5   3  -2  321.01    4.75
   5  -3  -2  312.83    4.83
  -5   3   2  325.44    4.83
   5  -3  -2  319.44    4.58
  -5   3   2  326.53    4.25
   5   3  -1 1367.60   14.88
  -5  -3   1 1356.14   14.63
  -5   3   1 1351.61   14.90
   5  -3  -1 1334.06   14.94
   5  -3  -1 1392.08   14.41
  -5   3   1 1354.13   13.80
   5  -3  -1 1328.51   13.70
   5   3   0 1041.24   12.13
  -5  -3   0 1063.82   11.93
  -5   3   0 1085.52   12.19
   5   3   0 1049.34   11.73
  -5  -3   0 1093.13   12.04
   5  -3   0 1046.77   12.19
   5  -3   0 1078.25   11.48
   5  -3   0 1082.41   10.74
  -5  -3  -1   17.99    0.90
   5  -3   1   16.70    0.67
  -5  -3  -1   16.82    0.89
   5   3   1   16.56    0.96
  -5   3  -2    5.03    0.60
  -5  -3  -2    5.73    0.60
   5  -3   2    5.83    0.67
  -5   3  -2    5.16    0.62
  -5  -3  -2    6.06    0.61
   5   3   2    6.55    0.57
   5  -3   2    6.74    0.39
  -5   3  -3  471.16    6.24
  -5  -3  -3  473.95    6.00
   5  -3   3  467.34    6.28
  -5  -3  -3  476.15    6.14
   5   3   3  477.72    5.84
   5  -3   3  467.09    4.82
   5   3   4    2.35    0.47
  -5  -3  -4    3.78    0.57
  -5   3  -4    2.19    0.50
   5   3   4    3.70    0.63
  -5   3  -4    2.86    0.52
   5  -3   4    3.27    0.58
   5  -3   4    3.45    0.27
   5   3   4    3.55    0.62
   5   3   5  117.43    2.71
  -5  -3  -5  120.32    2.53
  -5   3  -5  113.36    2.29
   5   3   5  115.96    2.57
  -5   3  -5  114.00    2.42
  -5  -3  -5  128.74    2.38
   5  -3   5  122.48    2.52
   5  -3   5  122.18    1.84
   5   3   5  117.35    2.31
   5   3   6   10.34    0.93
  -5  -3  -6   10.75    0.87
   5   3   6   10.93    0.88
  -5   3  -6   13.22    0.75
  -5   3  -6   11.89    0.81
   5   3   6   11.46    0.87
  -5  -3  -6   11.62    0.76
   5  -3   6   10.66    0.78
   5  -3   6   10.47    0.61
   5   3   6   11.05    0.76
   5   3   7   27.34    1.43
  -5   3  -7   27.31    0.96
   5   3   7   27.46    1.27
   5   3   7   27.07    1.24
  -5   3  -7   27.00    1.11
  -5  -3  -7   25.79    1.06
   5  -3   7   27.78    1.17
   5   3   7   26.08    1.10
   5  -3   7   26.70    1.02
   5   3   8   21.58    1.36
  -5   3  -8   20.30    0.79
   5   3   8   22.44    1.19
   5   3   8   19.21    1.06
  -5  -3  -8   19.65    0.98
   5  -3   8   20.92    1.01
   5   3   8   19.75    1.01
   5  -3   8   19.22    0.99
   5  -3   9    5.87    0.72
  -5   3  -9    6.75    0.68
   5   3   9    4.80    0.95
  -5   3  -9    6.46    0.47
   5   3   9    7.10    0.74
   5   3   9    7.37    0.83
  -5  -3  -9    6.22    0.66
   5   3   9    6.12    0.70
   5  -3   9    5.89    0.63
   5   3   9    5.76    0.69
   5   3  10   69.90    2.45
  -5   3 -10   69.38    1.89
   5   3  10   72.83    2.05
   5   3  10   69.33    1.81
  -5  -3 -10   68.74    1.80
   5  -3  10   74.19    1.61
   5   3  10   70.64    1.88
   5   3  10   69.44    1.78
   5  -3  10   72.83    2.10
   5  -3  11    6.80    0.93
   5   3  11    6.95    0.85
  -5  -3 -11    7.11    0.78
   5   3  11    6.31    0.65
   5  -3  11    5.62    0.45
   5   3  11    5.28    0.65
   5   3  11    6.15    1.14
   5   3  12   36.15    1.96
   5  -3  12   36.88    1.71
   5   3  12   33.32    1.42
   5   3  12   34.25    1.02
   5  -4 -13   23.39    1.84
  -5  -4  13   17.72    1.75
  -5   4  13   19.16    1.85
  -5  -4  12    6.76    1.31
  -5   4  12    7.31    1.36
  -5   4  12    4.69    0.77
  -5  -4  12    5.86    0.55
   5  -4 -12    4.91    0.81
   5  -4 -12    5.82    1.25
  -5   4  11  100.11    2.42
   5   4 -11   98.35    2.22
  -5  -4  11   95.00    1.88
   5  -4 -11  100.59    2.58
   5  -4 -11   97.88    3.22
  -5   4  11   99.01    3.32
   5  -4 -10   70.28    2.46
  -5  -4  10   73.77    1.66
   5   4 -10   70.10    1.94
  -5   4  10   72.37    2.05
   5  -4 -10   69.02    2.18
   5  -4 -10   68.71    2.63
  -5   4  10   72.47    2.72
   5  -4  -9  270.50    4.97
  -5  -4   9  270.44    3.86
  -5   4   9  270.70    4.45
   5   4  -9  266.81    4.32
   5   4  -9  264.02    4.84
   5  -4  -9  264.25    4.65
   5  -4  -9  268.78    5.23
  -5   4   9  264.29    5.24
   5   4  -9  263.36    5.15
   5  -4  -8  962.23   11.69
  -5  -4   8  928.68   10.48
   5   4  -8  950.80   11.13
  -5   4   8  944.28   11.19
  -5  -4   8  943.47   12.12
   5   4  -8  928.20   11.60
   5  -4  -8  955.73   11.51
   5  -4  -8  931.47   12.05
  -5   4   8  932.06   12.03
   5   4  -8  936.28   12.09
   5  -4  -7    7.93    0.90
  -5  -4   7    9.43    0.73
   5   4  -7    8.37    0.83
   5   4  -7    9.06    0.97
   5  -4  -7    9.77    0.93
  -5   4   7    7.49    0.84
   5  -4  -7    9.16    1.05
  -5   4   7    8.34    1.00
   5   4  -7    8.02    1.05
  -5  -4   7    8.93    1.04
   5  -4  -6   12.18    0.92
  -5  -4   6   13.06    0.82
   5   4  -6   12.36    0.94
   5   4  -6   10.09    0.83
   5   4  -6   10.79    0.96
  -5  -4   6   11.72    1.05
   5  -4  -6   11.99    0.98
   5  -4  -6   10.57    1.04
  -5   4   6   10.45    0.98
   5   4  -6   13.91    1.15
  -5  -4   5    7.62    0.68
   5   4  -5    5.61    0.66
   5   4  -5    7.78    0.85
  -5   4   5    5.46    0.71
   5  -4  -5    5.60    0.81
   5  -4  -5    5.03    0.67
  -5   4   5    9.61    0.86
   5   4  -5    5.38    0.83
   5   4  -4  920.54   10.81
  -5  -4   4  957.95   10.63
  -5   4   4  915.64   11.00
   5  -4  -4  944.39   11.27
   5   4  -4  926.91   11.35
  -5   4   4  926.66   10.75
   5  -4  -4  933.00   10.54
   5   4  -4  917.39   11.03
   5  -4  -3  596.15    7.03
   5   4  -3  600.78    7.65
   5   4  -3  591.02    7.89
   5   4  -3  584.21    7.56
  -5  -4   3  606.89    7.38
   5  -4  -3  599.64    7.91
   5  -4  -3  584.59    7.67
  -5   4   3  602.69    7.23
   5  -4  -2  659.94    7.39
   5   4  -2  661.65    8.23
   5   4  -2  651.05    8.41
   5  -4  -2  673.83    8.55
  -5   4   2  666.91    8.37
   5  -4  -2  653.32    8.11
  -5   4   2  664.04    7.54
   5  -4  -1  400.52    4.59
   5   4  -1  406.28    5.68
  -5   4   1  402.18    5.73
  -5  -4   1  409.06    5.76
   5  -4  -1  405.90    5.90
   5  -4  -1  393.43    5.32
  -5   4   1  399.19    4.69
  -5  -4   0  196.23    3.36
   5   4   0  202.53    3.54
  -5   4   0  197.18    3.51
  -5   4   0  190.78    2.28
  -5  -4   0  200.95    3.51
   5  -4   0  193.17    3.61
   5  -4   0  196.36    2.26
   5  -4   0  194.74    3.05
  -5   4  -1 2475.27   25.79
   5   4   1 2529.38   25.38
  -5  -4  -1 2458.64   25.69
  -5  -4  -1 2507.55   25.60
   5   4   1 2423.91   25.82
   5  -4   1 2503.17   24.84
  -5   4  -2  285.24    4.49
  -5  -4  -2  285.10    4.39
   5  -4   2  288.68    4.66
  -5  -4  -2  293.94    4.44
   5  -4   2  294.23    3.60
   5   4   2  288.23    4.22
  -5   4  -3  195.93    3.48
  -5   4  -3  195.44    3.36
  -5  -4  -3  193.02    3.36
   5  -4   3  202.16    3.63
  -5  -4  -3  197.46    3.48
   5  -4   3  195.58    2.36
   5   4   3  198.10    3.29
   5   4   4  311.16    4.87
  -5  -4  -4  314.68    4.85
  -5   4  -4  319.71    4.77
  -5   4  -4  333.64    4.66
  -5  -4  -4  314.15    4.64
   5  -4   4  317.85    4.91
   5   4   4  311.24    5.02
   5   4   4  318.49    4.62
   5   4   5  225.70    3.91
  -5   4  -5  213.38    3.50
  -5  -4  -5  230.55    3.98
  -5   4  -5  224.68    3.74
  -5  -4  -5  231.53    3.68
   5  -4   5  218.19    2.45
   5  -4   5  224.78    3.88
   5   4   5  231.81    3.71
   5   4   5  228.12    4.15
   5   4   6  189.89    3.86
   5   4   6  189.91    3.57
  -5   4  -6  193.07    3.11
  -5   4  -6  195.90    3.37
  -5  -4  -6  185.75    3.27
   5  -4   6  191.17    3.46
   5  -4   6  189.03    2.55
   5   4   6  190.12    3.36
   5   4   7 1732.67   19.43
   5   4   7 1694.83   18.70
  -5   4  -7 1762.16   17.80
  -5   4  -7 1714.77   18.26
  -5  -4  -7 1736.86   18.33
   5  -4   7 1668.76   18.45
   5   4   7 1706.68   18.45
   5  -4   7 1741.42   17.58
   5   4   8  879.28   11.53
   5   4   8  935.36   10.96
  -5   4  -8  926.54    9.71
   5   4   8  904.17   10.78
  -5   4  -8  888.36   10.26
  -5  -4  -8  877.08   10.46
   5  -4   8  893.40   10.49
   5   4   8  887.05   10.60
   5   4   8  883.93   10.53
   5  -4   8  911.92   10.06
  -5   4  -9   35.32    1.19
   5   4   9   37.29    1.83
  -5   4  -9   34.84    0.87
   5   4   9   37.77    1.57
   5   4   9   34.84    1.43
  -5  -4  -9   35.86    1.40
   5  -4   9   39.05    1.34
   5   4   9   35.10    1.37
   5   4   9   35.74    1.44
   5  -4   9   38.06    1.33
   5   4  10  169.26    3.43
   5   4  10  177.76    3.27
   5   4  10  175.58    4.10
  -5   4 -10  169.90    3.02
  -5  -4 -10  178.10    3.29
   5   4  10  177.97    3.36
   5   4  10  175.21    3.22
   5  -4  10  174.64    2.88
   5  -4  10  176.71    3.27
   5   4  11  158.26    3.32
   5   4  11  165.86    3.01
   5   4  11  161.86    4.03
  -5  -4 -11  159.61    3.14
   5   4  11  163.49    2.99
   5   4  11  162.71    3.21
   5  -4  11  156.44    2.36
   5  -4  11  166.02    3.31
   5   4  12  114.76    3.48
   5  -4  12  113.74    2.82
   5   4  12  112.30    2.73
   5   4  12  116.61    2.25
   5  -5 -13   34.95    2.16
  -5   5  12    0.60    0.66
   5  -5 -12   -0.55    1.04
   5  -5 -12   -0.07    0.73
  -5  -5  12    0.86    1.00
  -5   5  12   -0.32    1.14
  -5   5  11   76.84    2.94
  -5  -5  11   83.37    1.77
  -5   5  11   82.97    2.29
   5   5 -11   80.35    2.09
  -5  -5  11   79.33    2.94
   5  -5 -11   81.63    2.45
   5  -5 -11   82.70    2.99
  -5   5  10  121.92    3.59
  -5  -5  10  123.74    2.30
   5  -5 -10  122.77    3.06
   5  -5 -10  119.34    3.55
   5   5 -10  123.06    2.59
   5   5 -10  125.64    2.75
  -5   5  10  120.29    2.82
   5  -5  -9    4.87    0.97
   5  -5  -9    2.88    0.97
  -5  -5   9    2.94    0.58
   5   5  -9    3.11    0.72
  -5   5   9    3.72    0.77
   5  -5  -9    4.26    0.92
   5   5  -9    3.30    0.98
  -5   5   9    4.06    1.06
   5  -5  -8    2.27    0.83
   5  -5  -8    1.93    0.93
  -5  -5   8    3.99    0.61
   5   5  -8    1.99    0.66
   5   5  -8    3.03    0.87
  -5   5   8    1.80    0.67
   5  -5  -8    1.82    0.81
  -5   5   8    2.22    0.92
   5   5  -8    3.32    1.03
   5  -5  -7    4.98    0.81
   5  -5  -7    7.82    1.04
  -5  -5   7    5.08    0.63
   5   5  -7    5.39    0.72
  -5   5   7    5.10    0.76
  -5   5   7    4.78    0.86
   5   5  -7    5.74    0.97
   5  -5  -7    5.02    0.87
   5   5  -7    4.56    0.84
  -5  -5   6  136.95    2.61
   5   5  -6  138.11    2.78
   5   5  -6  132.68    3.03
   5  -5  -6  135.82    3.20
  -5   5   6  130.08    2.93
  -5   5   6  130.84    3.05
   5   5  -6  130.34    3.29
   5  -5  -6  130.92    2.88
  -5  -5   5    0.44    0.49
   5   5  -5    0.71    0.52
   5  -5  -5    0.54    0.66
  -5   5   5    1.02    0.61
   5  -5  -5    0.22    0.51
  -5   5   5    0.69    0.59
   5   5  -5    0.12    0.70
   5  -5  -4   56.39    1.60
   5   5  -4   55.40    1.72
  -5  -5   4   64.39    1.72
   5   5  -4   56.03    1.83
  -5   5   4   55.82    1.85
   5  -5  -4   57.60    2.01
  -5   5   4   55.63    1.68
   5   5  -4   55.78    1.99
   5  -5  -4   55.83    1.90
   5  -5  -3    0.32    0.51
  -5  -5   3    0.57    0.51
   5   5  -3    0.12    0.49
   5  -5  -3    0.49    0.59
   5  -5  -3    1.25    0.43
  -5   5   3    0.09    0.43
   5   5  -3    0.74    0.56
   5  -5  -2  233.36    3.25
   5   5  -2  236.11    3.93
   5   5  -2  236.07    4.19
  -5  -5   2  234.44    4.21
   5   5  -2  237.15    4.00
  -5   5   2  239.96    4.14
   5  -5  -2  241.22    4.37
  -5   5   2  234.41    3.37
   5  -5  -2  236.09    3.94
   5  -5  -1  390.26    4.50
   5   5  -1  393.29    5.68
  -5  -5   1  384.53    5.81
   5  -5  -1  395.41    6.05
  -5   5   1  396.68    5.77
  -5   5   1  390.59    4.62
   5  -5  -1  392.91    5.39
  -5  -5   0    0.65    0.51
   5   5   0    0.78    0.52
  -5  -5   0    0.16    0.53
  -5   5   0   -0.03    0.52
   5  -5   0    1.97    0.65
  -5   5   0    0.56    0.18
   5  -5   0    0.30    0.40
  -5   5  -1    3.74    0.65
   5   5   1    3.45    0.60
  -5  -5  -1    4.93    0.71
   5  -5   1    3.67    0.48
  -5  -5  -1    2.35    0.58
   5   5   1    3.47    0.66
  -5  -5  -2   14.09    0.96
   5  -5   2   12.07    1.01
  -5   5  -2   14.09    0.96
   5   5   2   14.06    0.99
  -5  -5  -2   13.74    0.98
   5  -5   2   14.42    0.66
  -5   5  -3  328.33    4.99
  -5  -5  -3  326.49    4.94
   5  -5   3  318.42    5.19
  -5  -5  -3  327.30    5.09
   5   5   3  329.25    4.84
   5  -5   3  321.20    3.77
  -5   5  -4 2837.40   28.40
  -5  -5  -4 2795.75   28.37
   5  -5   4 2798.10   28.75
   5   5   4 2854.40   28.59
  -5  -5  -4 2808.48   28.74
   5   5   4 2760.61   28.25
  -5   5  -5  933.24   11.09
  -5   5  -5  947.27   10.78
  -5  -5  -5  938.20   11.10
   5  -5   5  935.96   11.39
   5   5   5  956.23   11.32
   5   5   5  963.42   11.15
  -5   5  -6  601.27    7.36
   5   5   6  590.25    7.95
  -5   5  -6  614.96    7.77
  -5  -5  -6  609.17    7.82
   5  -5   6  625.03    8.08
   5   5   6  600.70    7.87
   5   5   6  607.47    8.56
   5   5   7   10.85    1.17
  -5   5  -7   11.96    0.77
   5   5   7   11.43    1.06
  -5   5  -7   12.63    0.91
   5  -5   7   11.62    0.53
   5  -5   7   11.67    0.97
   5   5   7   12.73    1.00
   5   5   7   10.34    0.97
   5   5   8  215.11    4.52
   5   5   8  205.29    3.92
  -5   5  -8  203.52    3.04
  -5   5  -8  211.09    3.58
   5  -5   8  220.42    3.08
  -5  -5  -8  213.10    3.80
   5  -5   8  213.11    3.77
   5   5   8  214.15    3.86
   5   5   8  218.29    3.93
   5   5   9    2.18    0.72
  -5   5  -9    1.26    0.34
   5   5   9    1.93    0.72
  -5   5  -9    1.12    0.52
  -5   5  -9    1.46    0.46
   5   5   9    1.41    0.92
  -5  -5  -9    1.83    0.70
   5   5   9    2.29    0.69
   5  -5   9    2.15    0.61
   5  -5   9    1.51    0.49
   5   5  10   22.88    1.37
   5   5  10   25.03    1.28
   5   5  10   26.03    1.71
  -5  -5 -10   25.53    1.34
   5  -5  10   26.39    1.13
   5   5  10   27.14    1.32
   5   5  10   25.55    1.33
   5  -5  10   25.38    1.13
   5   5  11   53.79    1.95
   5   5  11   52.92    1.74
   5   5  11   51.36    2.37
  -5  -5 -11   52.80    1.84
   5   5  11   52.60    1.72
   5  -5  11   52.72    1.32
   5   5  11   52.23    1.90
   5  -5  11   52.30    1.68
   5  -5  12   21.91    1.24
   5   5  12   24.54    1.41
   5   5  12   22.01    1.11
   5  -6 -13   -0.07    1.27
   5  -6 -12   34.49    2.13
  -5  -6  12   33.78    2.09
   5  -6 -12   34.06    1.68
  -5   6  12   34.34    2.24
  -5   6  12   33.91    1.56
   5  -6 -11   13.41    1.50
   5   6 -11   16.06    1.09
  -5   6  11   15.20    1.18
   5  -6 -11   15.28    1.29
  -5  -6  11   13.58    1.50
  -5   6  11   14.32    1.63
   5  -6 -10  246.72    5.31
  -5   6  10  240.41    4.42
   5   6 -10  246.63    4.29
  -5  -6  10  237.47    5.15
   5   6 -10  247.52    4.18
   5  -6 -10  248.25    4.75
  -5   6  10  247.18    5.27
  -5   6   9  140.77    3.71
   5  -6  -9  146.65    3.55
  -5  -6   9  145.57    2.74
   5   6  -9  145.97    3.18
  -5   6   9  143.39    3.22
   5  -6  -9  145.47    3.51
   5   6  -9  146.73    3.05
   5  -6  -9  152.30    3.93
   5  -6  -8  310.38    5.31
  -5  -6   8  307.21    4.53
   5   6  -8  303.96    4.64
   5   6  -8  307.47    5.27
  -5   6   8  307.10    5.13
   5  -6  -8  303.63    5.48
   5  -6  -8  308.75    5.78
  -5   6   8  310.52    5.59
   5   6  -8  305.97    5.73
   5  -6  -7    6.72    0.91
  -5  -6   7    8.55    0.77
   5   6  -7    7.25    0.82
   5   6  -7    7.86    0.99
  -5   6   7    7.47    0.93
   5  -6  -7    8.67    1.02
   5   6  -7    6.35    1.02
  -5   6   7    8.68    1.05
   5   6  -6  761.21    9.67
   5   6  -6  731.12    9.17
  -5  -6   6  750.31    8.99
   5  -6  -6  755.57   10.13
  -5   6   6  759.12    9.61
   5   6  -6  737.35   10.12
  -5   6   6  735.01    9.58
   5  -6  -6  754.72    9.39
   5   6  -5  349.40    5.47
   5   6  -5  355.30    5.27
  -5  -6   5  349.23    5.11
  -5   6   5  355.81    5.56
   5  -6  -5  351.38    5.95
  -5   6   5  352.22    5.35
   5   6  -5  351.28    5.88
   5  -6  -5  348.50    5.15
   5  -6  -4   13.71    0.85
  -5  -6   4   13.00    0.95
   5   6  -4   13.77    0.96
   5   6  -4   12.55    0.98
   5  -6  -4   14.29    1.18
  -5   6   4   14.67    1.08
   5  -6  -4   13.96    1.11
  -5   6   4   13.40    0.93
   5   6  -4   11.98    1.07
   5  -6  -3    0.55    0.41
   5  -6  -3    1.51    0.64
   5   6  -3    1.48    0.57
  -5  -6   3    0.67    0.57
   5   6  -3    2.33    0.66
   5  -6  -3    0.99    0.71
   5   6  -3    1.51    0.66
  -5   6   3    0.96    0.50
   5  -6  -2  746.00    8.29
  -5  -6   2  745.57    9.22
   5   6  -2  739.45    9.29
  -5   6   2  751.14    9.47
   5  -6  -2  739.52    9.97
   5   6  -2  742.25    9.21
  -5  -6   2  753.12    9.73
   5   6  -2  753.57    9.64
  -5   6   2  748.46    8.44
   5  -6  -2  750.71    9.27
   5   6  -1 1975.09   20.92
  -5   6   1 1972.81   21.08
   5  -6  -1 1929.66   21.62
  -5  -6   1 1938.68   21.26
  -5   6   1 1954.04   19.54
   5  -6  -1 1923.44   20.59
   5   6   0  488.52    6.75
  -5  -6   0  486.94    6.85
  -5  -6   0  491.27    6.97
  -5   6   0  489.91    6.84
  -5   6   0  483.60    5.16
   5  -6   0  499.92    6.34
  -5   6  -1    1.65    0.63
  -5  -6  -1    0.55    0.60
   5  -6   1    0.10    0.41
  -5  -6  -1   -0.03    0.57
   5   6   1    0.52    0.55
  -5  -6  -2  105.98    2.62
  -5  -6  -2  104.35    2.69
   5   6   2  107.77    2.61
   5  -6   2  105.90    1.96
   5   6   2  105.88    2.50
   5  -6   2  111.68    2.88
  -5   6  -2  106.58    2.59
   5  -6   3  163.35    3.56
  -5   6  -3  163.48    3.31
   5   6   3  167.37    3.26
   5  -6   3  163.71    2.39
  -5  -6  -3  163.60    3.34
   5  -6   4   10.60    1.04
  -5   6  -4   10.27    0.93
  -5  -6  -4    9.91    0.96
   5  -6   4    9.64    0.47
   5   6   4    9.97    0.92
   5   6   5   79.58    2.30
  -5   6  -5   80.38    2.20
  -5  -6  -5   82.26    2.26
   5  -6   5   81.48    2.40
   5   6   5   79.15    2.29
   5   6   5   76.62    2.23
   5   6   6    3.55    0.77
  -5   6  -6    3.12    0.59
  -5  -6  -6    3.95    0.77
  -5   6  -6    3.60    0.72
   5  -6   6    4.06    0.84
   5   6   6    3.29    0.78
   5   6   6    3.78    0.79
   5   6   7  863.83   11.40
  -5   6  -7  879.00    9.71
   5   6   7  864.30   10.67
  -5   6  -7  844.89   10.24
  -5  -6  -7  828.66   10.44
   5  -6   7  830.93   10.53
   5   6   7  845.54   10.61
   5   6   7  841.18   10.63
  -5   6  -8   86.53    1.79
   5   6   8   89.46    2.50
  -5   6  -8   84.97    2.20
  -5  -6  -8   92.32    2.48
   5   6   8   86.33    2.87
   5   6   8   89.08    2.49
   5  -6   8   87.81    2.37
   5   6   8   90.87    2.50
   5   6   9   31.50    1.91
  -5  -6  -9   30.63    1.53
   5  -6   9   30.70    1.39
   5   6   9   31.90    1.54
   5   6   9   31.38    1.56
   5   6   9   33.36    1.59
   5   6  10    0.08    0.79
   5  -6  10   -0.02    0.49
  -5  -6 -10    0.94    0.72
   5   6  10    1.13    0.74
   5  -6  10    0.21    0.57
   5   6  10    0.28    1.03
   5  -6  11   91.92    2.05
  -5  -6 -11   94.54    2.59
   5  -6  11   89.49    1.94
   5   6  11   90.96    3.16
   5   6  11   92.89    2.47
   5  -7 -12  159.62    4.48
   5  -7 -11    0.25    1.10
   5  -7 -11    0.05    0.89
  -5   7  11    0.80    1.15
   5   7 -11    0.92    0.72
   5  -7 -10    4.31    1.25
   5   7 -10    5.16    0.89
   5  -7 -10    4.71    1.01
  -5   7  10    4.78    1.22
   5  -7  -9  218.10    4.97
   5   7  -9  217.53    3.70
   5  -7  -9  217.97    4.48
  -5   7   9  217.11    4.24
   5   7  -9  217.89    4.05
   5  -7  -9  211.76    4.57
  -5   7   9  221.10    4.80
   5  -7  -8    2.79    1.02
   5   7  -8    3.79    0.74
  -5   7   8    3.41    0.87
   5   7  -8    2.57    0.98
   5   7  -8    3.15    0.76
   5  -7  -8    3.62    1.02
   5  -7  -8    2.67    0.94
  -5   7   8    2.89    0.93
   5  -7  -7  307.91    5.12
   5   7  -7  291.01    4.72
  -5  -7   7  296.87    4.69
   5  -7  -7  299.17    5.60
  -5   7   7  297.05    5.14
   5   7  -7  307.85    5.02
   5   7  -7  311.20    5.72
  -5   7   7  302.54    5.35
   5  -7  -6  285.47    4.73
   5   7  -6  296.60    4.70
  -5  -7   6  285.73    4.60
   5   7  -6  285.07    4.91
  -5   7   6  281.36    4.94
   5  -7  -6  281.70    5.42
   5   7  -6  285.98    4.81
   5   7  -6  289.38    5.40
  -5   7   6  280.02    4.90
   5  -7  -5    0.32    0.59
  -5   7   5   -0.13    0.66
   5  -7  -5    0.04    0.84
  -5  -7   5   -0.03    0.65
   5   7  -5    0.26    0.63
   5   7  -5    1.20    0.67
  -5   7   5    0.46    0.71
   5  -7  -5    1.07    0.82
   5   7  -5    0.27    0.74
  -5  -7   4  281.29    4.62
   5   7  -4  277.64    4.59
   5   7  -4  273.07    4.65
   5  -7  -4  273.48    4.21
  -5   7   4  268.45    4.81
   5  -7  -4  281.53    5.31
   5  -7  -4  276.82    4.96
  -5   7   4  279.12    4.38
   5   7  -4  282.63    5.09
  -5   7   3   35.89    1.30
   5   7  -3   36.49    1.54
  -5  -7   3   36.81    1.58
   5   7  -3   39.68    1.76
  -5  -7   3   34.73    1.71
   5   7  -3   37.48    1.55
   5  -7  -3   38.30    1.24
   5  -7  -3   35.14    1.79
  -5   7   3   38.08    1.56
   5  -7  -3   38.77    1.64
  -5   7   2  210.99    3.25
  -5  -7   2  216.73    4.30
   5   7  -2  220.79    4.25
   5   7  -2  213.39    3.91
   5   7  -2  215.72    3.94
  -5  -7   2  213.88    4.05
  -5   7   2  214.44    4.12
   5  -7  -2  211.72    4.49
  -5   7   2  217.59    3.84
   5  -7  -2  214.92    3.96
  -5   7   1  299.64    3.83
  -5  -7   1  294.55    5.18
   5   7  -1  285.62    4.79
  -5   7   1  300.90    5.05
   5  -7  -1  294.03    5.48
  -5   7   1  299.19    4.62
   5   7  -1  300.62    4.83
   5  -7  -1  295.91    4.68
  -5   7   0  124.44    1.77
   5   7   0  122.58    2.88
  -5  -7   0  122.24    3.05
  -5   7   0  125.37    2.96
  -5   7   0  126.32    2.57
   5  -7   0  119.79    2.57
   5   7   1    3.71    0.76
  -5   7  -1    4.19    0.77
  -5  -7  -1    4.26    0.79
  -5   7  -1    3.98    0.60
   5  -7   1    4.05    0.58
   5   7   2  257.17    4.49
  -5  -7  -2  252.29    4.59
  -5   7  -2  253.55    3.73
   5  -7   2  258.53    3.71
   5   7   2  257.71    4.43
  -5   7  -2  255.88    4.50
   5  -7   2  253.29    4.89
  -5  -7  -3   57.17    2.00
  -5   7  -3   62.45    1.45
   5   7   3   56.90    2.04
   5   7   3   56.05    1.93
   5  -7   3   57.85    1.37
  -5   7  -3   57.48    1.95
   5  -7   3   55.82    2.15
  -5  -7  -4  108.11    2.76
   5  -7   4  107.44    1.84
   5  -7   4  108.94    2.97
  -5   7  -4  108.60    2.70
  -5   7  -4  107.29    1.85
   5   7   4  108.51    2.84
   5   7   4  112.81    2.82
   5   7   5    7.90    0.95
   5  -7   5    7.22    0.43
  -5  -7  -5    9.13    0.98
  -5   7  -5    6.34    0.86
   5   7   5    7.82    0.97
   5  -7   5    7.26    0.96
   5   7   5    6.95    0.93
   5   7   6   97.73    2.63
  -5  -7  -6   96.96    2.64
  -5   7  -6   92.96    2.22
  -5   7  -6   97.91    2.51
   5   7   6   92.52    2.66
   5  -7   6   97.01    2.73
   5   7   6   94.67    2.61
   5   7   7   22.56    1.40
  -5   7  -7   20.72    1.02
  -5   7  -7   21.41    1.24
  -5  -7  -7   22.19    1.37
   5   7   7   20.70    1.34
   5  -7   7   20.95    1.36
   5   7   7   20.73    1.36
  -5   7  -8  100.28    2.50
  -5  -7  -8  106.34    2.81
  -5   7  -8   97.29    2.01
   5  -7   8  105.50    2.73
   5   7   8  103.93    2.84
   5   7   8  100.12    3.22
   5   7   9  113.03    2.95
   5  -7   9  113.25    2.75
  -5  -7  -9  111.04    2.89
   5   7   9  107.95    3.41
   5  -7  10    3.18    0.74
   5   7  10    5.13    0.93
  -5  -7 -10    3.78    0.88
   5   7  10    4.15    1.18
   5  -7  11   13.63    0.93
  -5  -7 -11   15.54    1.29
   5  -8 -11   24.83    1.93
  -5   8  11   28.99    2.01
   5  -8 -11   27.05    1.72
   5  -8 -10  166.50    4.46
  -5   8  10  165.35    4.28
   5  -8 -10  171.11    4.15
   5  -8  -9   16.45    1.63
   5   8  -9   18.80    1.32
  -5   8   9   17.46    1.53
   5  -8  -8    5.21    1.03
  -5   8   8    6.39    1.08
   5   8  -8    5.82    0.95
   5  -8  -8    6.12    1.14
   5   8  -8    5.58    0.86
   5   8  -7   61.71    1.99
   5   8  -7   57.37    2.08
   5  -8  -7   59.10    2.48
  -5   8   7   59.94    2.22
   5  -8  -7   57.20    2.07
   5   8  -6  158.26    3.93
  -5   8   6  160.43    3.51
   5  -8  -6  161.52    3.34
   5   8  -6  156.63    3.30
   5   8  -6  163.52    3.60
   5  -8  -6  157.22    4.03
   5  -8  -6  157.61    3.92
  -5   8   5  584.73    7.82
   5   8  -5  590.30    8.66
   5   8  -5  577.20    7.83
   5  -8  -5  586.71    7.60
  -5   8   5  583.73    8.28
   5  -8  -5  574.37    8.86
   5   8  -5  567.35    8.14
   5  -8  -5  578.95    8.50
  -5   8   4  192.76    3.48
   5   8  -4  191.74    4.14
   5   8  -4  184.20    3.76
   5   8  -4  178.00    3.64
  -5   8   4  179.18    3.91
   5  -8  -4  186.37    4.37
  -5   8   4  191.18    3.87
   5   8  -4  183.77    3.87
   5  -8  -4  185.67    4.00
  -5   8   3   65.40    1.77
   5   8  -3   62.76    2.03
   5   8  -3   62.88    2.08
   5   8  -3   65.79    2.31
  -5  -8   3   68.76    2.45
   5  -8  -3   63.67    2.49
  -5   8   3   63.62    2.09
   5   8  -3   61.43    2.15
   5  -8  -3   60.03    2.14
  -5   8   2    0.25    0.45
   5  -8  -2    0.40    0.66
   5   8  -2    0.81    0.67
  -5   8   2    0.04    0.73
   5   8  -2    0.77    0.77
   5  -8  -2    0.10    0.84
  -5   8   2   -0.07    0.61
   5   8  -2    0.16    0.68
   5   8  -2   -0.07    0.69
  -5  -8   2    0.50    0.78
  -5   8   1  120.79    2.10
  -5  -8   1  120.68    3.19
   5   8  -1  124.15    2.96
  -5   8   1  122.00    3.05
   5  -8  -1  120.74    3.43
  -5   8   1  123.30    2.76
   5   8  -1  123.55    3.09
   5  -8  -1  120.53    2.79
   5   8  -1  122.05    2.91
  -5   8   0  289.01    3.56
  -5  -8   0  292.52    5.28
   5   8   0  294.05    4.96
  -5   8   0  293.41    5.12
  -5   8   0  298.08    4.62
   5   8   0  290.88    5.17
   5  -8   0  304.48    4.66
  -5  -8  -1  198.89    4.13
   5   8   1  204.17    3.94
  -5   8  -1  193.26    3.96
  -5   8  -1  193.98    3.41
   5  -8   1  194.87    3.41
  -5  -8  -2  154.17    3.57
   5   8   2  154.33    3.37
  -5   8  -2  148.60    3.38
   5  -8   2  149.40    3.78
  -5   8  -2  152.06    2.80
   5   8   2  157.32    3.40
   5  -8   2  150.86    2.74
   5   8   3   58.61    2.24
  -5  -8  -3   60.99    2.19
   5  -8   3   60.17    1.52
   5   8   3   61.02    2.09
  -5   8  -3   59.00    2.07
   5  -8   3   59.23    2.31
   5   8   3   60.03    2.21
  -5   8  -3   58.82    1.55
  -5  -8  -4   44.14    1.90
   5  -8   4   44.63    1.22
   5   8   4   46.46    1.88
  -5   8  -4   41.73    1.75
   5   8   4   45.05    1.95
  -5   8  -4   42.17    1.22
   5  -8   4   41.51    1.96
   5   8   4   38.61    1.94
   5   8   5  393.89    6.21
  -5  -8  -5  392.19    6.28
   5  -8   5  393.97    4.77
  -5   8  -5  395.07    4.73
   5   8   5  419.60    6.59
   5  -8   5  399.83    6.55
   5   8   5  380.12    6.70
  -5   8  -5  374.41    5.96
  -5   8  -6  135.91    3.13
  -5  -8  -6  140.44    3.36
   5  -8   6  135.29    3.42
  -5  -8  -7  217.95    4.35
  -5   8  -7  217.94    4.08
  -5   8  -7  211.02    3.61
   5  -8   7  225.51    4.46
   5  -8   8    3.82    0.92
  -5  -8  -8    3.47    0.96
   5  -8   9   32.26    1.58
  -5  -8  -9   36.02    1.78
   5   8   9   33.19    2.10
   5  -8  10   30.60    1.47
  -5  -8 -10   31.09    1.69
   5  -9 -10    5.86    1.23
   5  -9 -10    5.25    1.31
  -5   9  10    4.05    1.30
   5  -9  -9  135.54    3.97
   5  -9  -9  132.18    3.79
  -5   9   9  137.10    3.75
  -5   9   8    5.70    1.12
   5  -9  -8    6.39    1.18
   5   9  -8    4.94    0.88
   5   9  -7  446.07    6.53
   5  -9  -7  450.94    7.71
  -5   9   7  447.53    6.98
   5  -9  -7  445.32    6.73
  -5   9   6   20.20    1.38
   5  -9  -6   16.72    1.58
   5  -9  -6   18.14    1.52
   5   9  -6   17.67    1.25
  -5   9   5  309.00    5.06
   5   9  -5  302.70    5.73
   5   9  -5  309.20    5.15
   5  -9  -5  300.55    6.05
   5  -9  -5  313.60    5.72
  -5   9   4  728.78    9.01
   5   9  -4  721.77   10.06
   5   9  -4  709.67    9.37
   5  -9  -4  732.36   10.61
   5  -9  -4  704.70    9.85
  -5   9   3  238.96    3.88
   5   9  -3  237.98    4.78
   5   9  -3  239.01    4.42
  -5   9   3  241.17    4.50
   5  -9  -3  238.55    5.23
   5  -9  -3  230.57    4.58
  -5   9   2  185.15    3.10
  -5  -9   2  192.65    4.32
   5   9  -2  185.50    4.12
   5   9  -2  184.99    3.81
  -5   9   2  185.57    3.79
   5  -9  -2  189.46    4.54
   5  -9  -2  185.92    3.86
  -5   9   1   26.47    0.98
  -5  -9   1   31.95    1.81
   5   9  -1   28.86    1.50
  -5   9   1   28.90    1.45
   5  -9  -1   26.63    1.78
   5  -9  -1   32.56    1.50
  -5   9   0   64.04    1.32
   5   9   0   61.40    2.15
  -5  -9   0   63.48    2.42
  -5   9   0   65.23    1.99
   5  -9   0   65.54    2.02
   5   9   1   10.00    1.07
  -5   9  -1    8.55    0.40
  -5  -9  -1    9.74    1.15
   5  -9   1    8.68    0.85
  -5   9  -1    9.40    0.88
  -5   9  -1    8.16    0.38
   5   9   2  170.76    3.67
  -5  -9  -2  162.73    3.86
   5  -9   2  165.41    4.13
  -5   9  -2  165.95    3.10
   5  -9   2  164.81    3.03
  -5  -9  -3   31.34    1.73
   5  -9   3   32.22    1.21
   5   9   3   31.41    1.78
  -5   9  -3   31.05    1.23
   5  -9   3   29.88    1.83
  -5  -9  -4   58.04    2.28
   5  -9   4   67.10    1.65
   5   9   4   63.81    2.50
  -5   9  -4   61.74    1.61
   5  -9   4   63.95    2.50
  -5  -9  -5  111.70    3.12
   5  -9   5  114.53    2.14
   5   9   5  108.49    3.35
   5  -9   5  109.83    3.21
  -5  -9  -6  152.94    3.68
   5   9   6  148.78    4.01
   5  -9   6  154.46    3.78
  -5  -9  -7    8.74    1.16
   5   9   7    7.77    1.30
   5  -9   7    8.71    1.17
  -5  -9  -8    6.71    1.11
   5  -9   8    7.21    1.08
  -5  -9  -9    2.57    1.02
   5  -9   9    1.56    0.84
   5 -10  -9    9.57    1.40
  -5  10   9   11.09    1.46
   5 -10  -8  188.63    4.72
  -5  10   8  185.07    4.27
  -5  10   7   42.41    1.98
   5  10  -7   42.49    1.79
   5 -10  -7   39.91    2.26
   5 -10  -7   41.30    2.29
  -5  10   6    4.33    0.95
   5 -10  -6    5.00    1.23
   5 -10  -6    4.33    1.15
   5  10  -6    3.49    0.95
  -5  10   5  481.26    6.92
   5 -10  -5  468.34    8.18
   5 -10  -5  460.43    7.63
   5  10  -5  481.84    7.09
  -5  10   4   25.58    1.34
   5  10  -4   25.96    1.48
   5 -10  -4   25.14    1.90
   5 -10  -4   25.49    1.67
   5  10  -3    2.59    0.87
   5 -10  -3    2.89    0.92
   5 -10  -3    3.55    1.18
  -5  10   3    3.09    0.70
  -5  10   2   85.20    2.01
  -5 -10   2   84.87    2.95
   5  10  -2   88.52    2.63
   5 -10  -2   84.05    3.12
  -5  10   2   85.53    2.54
   5 -10  -2   86.98    2.59
   5 -10  -1  229.57    4.33
  -5  10   1  228.79    4.29
   5 -10  -1  233.28    5.26
  -5  10   1  223.80    3.39
  -5 -10   1  227.11    4.89
   5 -10   0  275.39    4.75
  -5  10   0  286.15    4.80
  -5  10   0  280.45    3.68
  -5 -10   0  286.69    5.60
   5 -10   1  719.90    9.00
  -5  10  -1  711.40    7.50
  -5 -10  -1  722.11   10.21
  -5  10  -1  702.90    7.46
   5 -10   1  727.50   10.70
  -5  10  -1  729.78    9.09
  -5 -10  -2   16.17    1.43
   5 -10   2   15.62    1.05
   5 -10   2   18.67    1.61
  -5  10  -2   15.98    1.06
   5 -10   3  129.86    2.67
  -5 -10  -3  138.34    3.62
   5  10   3  132.27    3.65
  -5  10  -3  131.64    2.73
   5 -10   3  133.31    3.79
  -5 -10  -4   92.43    3.00
   5 -10   4   97.16    2.21
   5  10   4   98.89    3.21
   5 -10   4  102.40    3.28
   5 -10   5    1.32    0.59
  -5 -10  -5    1.11    0.99
   5  10   5    0.93    1.05
   5 -10   5    1.54    0.96
  -5 -10  -6    4.84    1.10
   5  10   6    5.69    1.27
   5 -10   6    4.93    1.09
   5 -10   7   74.53    2.69
  -5 -10  -7   72.46    2.70
   5 -10   8    3.82    1.06
  -5 -10  -8    5.30    1.19
   5 -11  -8  251.12    5.67
  -5  11   8  243.10    5.08
   5 -11  -8  243.07    5.57
   5 -11  -7  150.55    4.33
  -5  11   7  146.22    3.68
   5 -11  -7  147.89    4.13
   5 -11  -6    1.67    1.28
  -5  11   6    1.27    0.92
   5 -11  -6    0.40    1.14
   5 -11  -5  153.71    4.01
   5 -11  -5  158.16    4.45
  -5  11   5  154.65    3.44
   5 -11  -4   36.96    1.98
   5 -11  -4   38.63    2.31
  -5  11   4   36.30    1.59
  -5 -11   4   37.90    2.15
   5 -11  -3   23.64    1.93
  -5  11   3   25.92    1.29
   5 -11  -3   24.35    1.65
  -5  11   2    0.33    0.58
   5 -11  -2    0.49    0.87
   5 -11  -2    1.26    1.07
  -5 -11   1  119.00    3.58
   5 -11  -1  113.12    3.02
   5 -11  -1  123.18    3.86
  -5 -11   0  176.40    4.41
   5 -11   0  181.81    3.74
  -5  11   0  187.70    3.80
   5 -11   1    0.17    0.74
  -5 -11  -1   -0.95    1.13
   5 -11   1    0.77    1.17
  -5  11  -1    1.35    0.78
   5 -11   2    0.51    1.06
  -5 -11  -2    1.06    0.98
   5 -11   2    0.80    0.70
   5  11   2    1.53    1.03
   5 -11   3    2.23    1.18
  -5 -11  -3    2.42    1.05
   5 -11   3    1.81    0.72
   5  11   3    1.15    1.10
   5 -11   4  101.47    3.38
  -5 -11  -4  104.65    3.31
   5 -11   4  103.43    2.41
   5  11   4   93.33    3.29
   5 -11   5   69.71    2.77
  -5 -11  -5   66.09    2.67
   5 -11   5   69.33    1.88
   5  11   5   64.87    2.81
  -5 -11  -6   27.02    1.81
   5 -11   6   27.76    1.14
   5 -11   6   25.57    1.83
   5 -12  -6   91.38    3.22
   5 -12  -6   96.32    3.60
   5 -12  -5   37.14    2.12
   5 -12  -5   42.40    2.51
  -5 -12   4   15.14    1.68
   5 -12  -4   17.89    1.55
   5 -12  -4   16.08    1.83
   5 -12  -3    2.88    1.03
  -5 -12   3    4.06    1.23
   5 -12  -3    3.12    1.27
   5 -12  -2   11.49    1.30
   5 -12  -2    9.84    1.57
   5 -12  -1   28.78    1.67
   5 -12   0   25.23    1.52
  -5 -12   0   25.45    1.91
   5 -12   1    1.30    1.22
   5 -12   1    1.09    0.83
  -5 -12  -1    1.57    1.10
   5 -12   2    6.51    1.34
  -5 -12  -2    6.13    1.30
   5 -12   2    6.75    0.97
   5  12   2    7.12    1.30
   5 -12   3    7.70    1.38
  -5 -12  -3    6.21    1.33
   5 -12   3    6.71    0.93
   5 -12   4   46.45    2.44
  -5 -12  -4   48.90    2.40
   5 -12   4   44.72    1.71
   5 -13  -2    1.12    1.09
   5 -13  -1  105.83    3.08
   5 -13   0    3.11    0.97
   6   0 -14   21.91    1.77
  -6   0  14   21.72    1.14
  -6   0  13   -0.35    1.10
   6   0 -13   -0.23    1.08
  -6   0  13    0.71    0.63
  -6   0  12    9.98    0.95
   6   0 -12    9.62    0.84
   6   0 -12    9.36    1.28
  -6   0  12    8.62    1.38
   6   0 -11   -0.06    0.57
  -6   0  11    0.30    1.00
   6   0 -11    0.10    0.87
  -6   0  11    0.10    0.65
   6   0 -10   49.61    1.65
  -6   0  10   48.92    2.29
  -6   0  10   51.70    1.80
  -6   0   9    0.05    0.89
   6   0  -9    0.20    0.56
  -6   0   9   -0.23    0.65
   6   0  -8 2112.84   22.63
  -6   0   8 2131.17   23.87
   6   0  -7    0.37    0.61
  -6   0   7   -0.47    0.77
   6   0  -7    0.65    0.75
  -6   0   7    0.23    0.64
   6   0  -6 1849.31   19.97
   6   0  -6 1901.20   20.41
  -6   0   6 1874.53   20.51
  -6   0   6 1822.18   20.02
   6   0  -5    0.09    0.55
  -6   0   5    0.25    0.55
  -6   0   5   -0.24    0.61
   6   0  -5    0.60    0.61
  -6   0   4  815.12    9.78
   6   0  -4  793.06    9.83
   6   0  -4  814.62    9.92
   6   0  -3   -0.03    0.48
  -6   0   3    0.47    0.46
   6   0  -3   -0.06    0.50
  -6   0   2 4933.47   50.12
   6   0  -2 5030.64   50.25
  -6   0   2 5008.68   50.16
   6   0  -1    0.06    0.48
   6   0  -1    0.24    0.39
  -6   0   1    0.09    0.45
   6   0   0   56.69    1.79
  -6   0   0   53.86    1.70
   6   0   0   58.33    1.48
   6   0   0   51.11    1.41
   6   0   1    0.17    0.35
   6   0   1    1.01    0.38
  -6   0  -1   -0.17    0.48
   6   0   2  862.57    9.28
   6   0   2  863.05   10.25
  -6   0  -2  871.14   10.21
   6   0   3    0.66    0.51
   6   0   3    0.25    0.27
  -6   0  -3    3.27    0.56
   6   0   3    0.08    0.46
   6   0   3    2.25    0.44
   6   0   4    4.60    0.65
   6   0   4    4.96    0.55
  -6   0  -4    3.52    0.56
   6   0   4    4.46    0.64
   6   0   4    4.57    0.37
   6   0   5    0.38    0.50
   6   0   5    0.14    0.41
  -6   0  -5    0.29    0.46
   6   0   5    0.19    0.49
   6   0   6  720.24    8.75
   6   0   6  714.12    8.56
   6   0   6  698.55    7.36
  -6   0  -6  712.01    8.45
   6   0   7    0.16    0.48
   6   0   7    0.36    0.53
  -6   0  -7    0.78    0.50
   6   0   7    0.27    0.51
   6   0   8  526.70    6.74
   6   0   8  532.36    7.05
  -6   0  -8  522.44    6.57
   6   0   8  515.74    6.77
  -6   0  -9   -0.10    0.55
   6   0   9   -0.23    0.51
   6   0   9    0.03    0.66
   6   0  10  817.47    9.14
   6   0  10  776.50   10.15
   6   0  11   -0.15    0.43
   6   0  11    0.57    0.77
   6   0  12    6.20    1.08
   6  -1 -14  101.35    3.45
   6   1 -14   99.56    3.37
  -6   1  14  101.48    2.51
  -6  -1  13   17.48    1.75
  -6   1  13   17.45    1.80
  -6   1  13   17.47    1.20
  -6  -1  13   17.96    1.03
   6   1 -13   15.03    1.55
   6  -1 -13   15.08    1.56
   6   1 -12    0.20    0.54
   6  -1 -12    0.65    0.61
  -6  -1  12   -0.28    0.58
  -6   1  12    1.38    0.73
   6   1 -12    0.77    1.01
   6  -1 -12    0.73    1.01
  -6  -1  12   -0.84    1.04
  -6   1  12    0.78    1.06
   6  -1 -11    5.29    0.77
   6   1 -11    4.72    0.68
  -6  -1  11    6.15    0.79
  -6   1  11    4.60    0.81
   6  -1 -11    5.88    1.12
  -6  -1  11    5.42    1.21
  -6   1  11    5.43    1.22
  -6  -1  10   82.07    2.18
   6   1 -10   79.55    2.08
   6  -1 -10   78.86    2.14
  -6   1  10   83.42    2.36
   6  -1 -10   79.72    2.76
  -6  -1  10   81.77    2.91
  -6   1  10   84.18    2.95
  -6  -1   9   81.96    2.19
   6  -1  -9   80.81    2.17
   6   1  -9   83.36    2.16
  -6   1   9   81.06    2.32
   6  -1  -9   76.57    2.60
  -6   1   9   80.72    2.76
   6  -1  -9   81.27    2.53
  -6  -1   9   77.76    2.74
   6   1  -8  158.26    3.16
  -6   1   8  164.00    3.37
  -6   1   8  157.63    3.15
  -6   1   8  155.35    3.77
   6  -1  -8  151.03    3.45
  -6  -1   8  152.55    3.75
  -6  -1   8  163.71    3.22
   6  -1  -8  156.59    3.18
   6   1  -7  113.40    2.64
  -6   1   7  111.50    2.60
  -6   1   7  112.45    2.72
   6  -1  -7  112.75    2.61
  -6   1   7  111.98    3.01
   6  -1  -7  114.65    2.83
  -6  -1   7  113.10    3.02
  -6  -1   7  114.57    2.63
   6   1  -6  468.53    6.48
  -6   1   6  470.57    6.44
  -6   1   6  461.20    6.55
  -6  -1   6  454.18    6.82
   6  -1  -6  450.08    6.37
   6  -1  -6  462.64    6.58
  -6   1   6  449.89    6.74
  -6  -1   6  460.46    6.42
   6   1  -5   27.82    1.32
  -6   1   5   27.91    1.29
  -6   1   5   25.68    1.31
   6  -1  -5   25.67    1.24
  -6   1   5   25.97    1.31
   6  -1  -5   26.85    1.28
   6   1  -5   25.25    1.35
  -6  -1   5   24.96    1.26
   6  -1  -4  295.02    4.70
  -6  -1   4  294.42    4.67
  -6   1   4  289.85    4.63
   6   1  -4  290.65    4.73
   6  -1  -4  291.77    4.52
   6   1  -4  292.05    4.74
  -6   1   4  285.29    4.54
  -6   1   3  112.72    2.41
   6  -1  -3  118.26    2.45
   6   1  -3  120.44    2.64
  -6   1   3  124.30    2.74
   6   1  -3  118.99    2.74
   6  -1  -3  123.73    2.74
  -6   1   2  324.20    4.46
   6   1  -2  323.62    4.72
  -6  -1   2  315.69    4.88
   6   1  -2  327.63    4.80
   6  -1  -2  321.89    4.53
   6  -1  -2  313.83    4.96
  -6   1   2  322.14    4.96
  -6   1   2  323.62    4.96
   6   1  -2  318.55    4.87
   6   1  -2  319.24    5.04
   6   1  -1 1008.43   11.32
   6   1  -1 1021.76   11.44
  -6  -1   1 1016.20   11.72
  -6   1   1 1006.66   11.80
   6  -1  -1  997.65   11.06
   6  -1  -1 1008.93   11.83
   6   1  -1 1010.76   11.91
   6   1  -1 1012.24   11.71
  -6   1   1 1025.12   11.80
   6   1   0  179.12    3.05
   6   1   0  181.94    2.99
  -6  -1   0  185.49    3.35
  -6   1   0  187.22    3.41
   6  -1   0  179.48    2.79
   6  -1   0  178.39    3.40
   6   1   0  180.58    3.37
  -6   1   0  182.04    3.37
   6   1   0  174.06    3.44
   6  -1   1  781.98    8.68
   6   1   1  795.55    8.90
   6  -1   1  796.12    8.75
  -6   1  -1  806.22    9.64
  -6  -1  -1  799.28    9.55
  -6   1  -1  795.78    9.59
   6   1   2   11.71    0.62
   6  -1   2   10.75    0.54
  -6   1  -2   10.95    0.84
  -6  -1  -2   10.42    0.81
  -6   1  -2   11.73    0.85
   6   1   3  311.18    4.82
  -6   1  -3  306.41    4.66
  -6  -1  -3  314.51    4.66
   6  -1   3  313.52    4.80
   6   1   3  304.56    4.84
  -6   1  -3  318.46    4.75
   6  -1   3  309.18    3.61
   6  -1   3  310.09    4.00
   6   1   3  310.55    3.97
  -6   1  -4  212.48    3.54
  -6  -1  -4  205.11    3.48
   6   1   4  196.56    3.59
   6   1   4  210.08    3.73
   6  -1   4  200.13    3.62
   6  -1   4  203.89    3.03
   6   1   4  209.05    3.44
   6  -1   4  204.27    2.42
   6   1   4  208.39    2.91
  -6  -1  -5   47.62    1.49
   6   1   5   45.72    1.60
  -6   1  -5   47.93    1.48
   6   1   5   47.11    1.62
  -6  -1  -5   50.25    1.23
   6  -1   5   48.95    1.59
   6   1   5   49.47    1.57
   6  -1   5   49.19    1.33
   6   1   5   47.80    1.16
  -6  -1  -6  145.57    2.77
  -6   1  -6  155.78    2.77
   6   1   6  137.09    2.91
   6   1   6  146.17    2.99
  -6  -1  -6  153.35    2.35
   6  -1   6  140.44    2.84
   6   1   6  151.63    2.32
   6  -1   6  146.81    2.62
   6   1   6  144.51    2.97
  -6  -1  -7    1.13    0.53
  -6   1  -7    0.78    0.46
   6   1   7    2.14    0.62
  -6  -1  -7    0.89    0.35
   6  -1   7    1.07    0.52
   6   1   7    1.15    0.57
   6   1   7    0.78    0.34
   6   1   7    0.54    0.59
   6  -1   7    0.69    0.48
   6   1   8    8.83    0.93
  -6   1  -8    8.70    0.70
  -6  -1  -8    8.62    0.80
   6   1   8    9.26    0.80
   6   1   8    8.48    0.82
  -6  -1  -8    8.73    0.56
   6  -1   8    9.18    0.77
   6   1   8    8.60    0.54
   6  -1   8    9.92    0.83
   6  -1   9    2.08    0.56
   6   1   9    0.72    0.54
  -6  -1  -9    1.42    0.39
   6   1   9    0.91    0.58
  -6   1  -9    2.09    0.52
   6  -1   9    1.35    0.65
   6   1   9    1.00    0.71
   6  -1  10   28.23    1.08
   6   1  10   27.57    1.12
   6   1  10   29.26    1.57
   6  -1  10   26.55    1.40
   6   1  10   27.51    1.23
   6   1  11   63.28    1.51
   6  -1  11   62.17    1.43
   6   1  11   61.01    1.48
   6   1  11   60.10    1.75
   6   1  11   62.42    2.28
   6  -1  11   63.55    2.16
   6  -1  12  162.74    3.73
   6   1  12  162.46    3.86
  -6   2  13   30.11    1.53
  -6  -2  13   27.08    1.12
   6  -2 -13   24.32    1.83
  -6   2  13   27.02    2.08
  -6  -2  13   26.49    2.10
  -6  -2  12    0.32    0.55
  -6   2  12   -0.07    0.76
   6  -2 -12    0.86    1.01
   6  -2 -12    0.41    0.64
  -6   2  12   -0.97    1.12
  -6  -2  12    1.55    1.11
  -6   2  11   42.74    1.75
  -6  -2  11   41.55    1.47
   6   2 -11   42.22    1.48
   6  -2 -11   44.45    1.67
   6  -2 -11   40.06    2.07
  -6   2  11   42.96    2.27
  -6  -2  11   41.38    2.25
   6  -2 -10  516.11    7.87
  -6   2  10  509.25    7.41
  -6   2  10  538.66    7.09
  -6  -2  10  547.25    7.00
   6  -2 -10  520.29    7.22
   6   2 -10  527.67    6.99
   6  -2 -10  511.07    8.17
  -6   2  10  529.05    8.43
  -6  -2  10  533.28    8.48
   6   2  -9   12.84    1.28
   6  -2  -9   12.19    1.20
  -6  -2   9   12.42    0.97
   6   2  -9   13.81    1.01
  -6   2   9   14.45    1.03
  -6   2   9   13.97    1.13
   6  -2  -9   12.16    1.03
   6  -2  -9   12.07    1.29
  -6   2   9    9.75    1.25
  -6  -2   9   13.51    1.34
   6  -2  -8  873.11   11.05
  -6  -2   8  879.36   10.48
  -6   2   8  897.64   10.65
   6   2  -8  895.68   10.65
  -6  -2   8  874.47   11.63
   6  -2  -8  891.03   10.72
   6  -2  -8  860.32   11.38
   6   2  -8  863.60   11.45
  -6   2   8  882.73   11.55
  -6  -2   7 2110.72   22.76
  -6   2   7 2154.48   22.94
   6   2  -7 2174.35   23.01
  -6  -2   7 2152.25   23.76
   6  -2  -7 2173.64   23.00
   6  -2  -7 2215.58   23.69
  -6   2   7 2159.27   23.67
   6  -2  -7 2184.33   23.21
  -6   2   6 1665.70   18.41
   6   2  -6 1676.61   18.49
  -6  -2   6 1721.63   19.00
   6  -2  -6 1721.39   18.50
  -6  -2   6 1660.80   18.26
  -6   2   6 1713.71   18.85
   6  -2  -6 1689.32   18.42
   6   2  -5  443.40    6.38
  -6   2   5  435.56    6.27
  -6  -2   5  443.35    6.53
  -6  -2   5  454.69    6.22
  -6   2   5  450.82    6.38
   6  -2  -5  445.28    6.12
   6  -2  -5  437.46    6.30
   6   2  -4  250.49    4.13
  -6   2   4  238.29    4.16
   6   2  -4  258.17    4.35
  -6  -2   4  244.12    4.09
   6  -2  -4  245.92    4.20
  -6   2   4  247.09    4.04
   6  -2  -4  239.83    3.89
   6  -2  -3   32.75    1.40
   6  -2  -3   30.42    1.15
  -6   2   3   28.14    1.15
   6   2  -3   29.16    1.36
  -6   2   3   29.42    1.35
   6   2  -3   29.49    1.30
   6  -2  -2  230.67    4.00
  -6   2   2  226.09    3.39
   6  -2  -2  222.14    3.39
   6   2  -2  221.50    3.84
  -6   2   2  231.39    3.98
   6   2  -2  229.07    3.93
   6   2  -2  224.89    4.06
  -6   2   2  227.43    4.00
  -6   2   1  270.53    4.46
   6   2  -1  274.02    4.61
  -6   2   1  272.12    4.46
   6   2  -1  274.01    4.29
   6   2  -1  273.35    4.18
   6  -2  -1  278.18    4.52
  -6  -2   1  276.66    4.38
   6   2  -1  284.01    4.49
   6  -2  -1  269.85    3.73
   6  -2   0    0.12    0.51
   6  -2   0    1.89    0.35
   6   2   0    0.41    0.46
  -6   2   0    0.06    0.49
   6   2   0    0.61    0.51
   6   2   0    0.17    0.52
  -6   2   0    0.06    0.51
  -6  -2   0    0.31    0.44
  -6   2  -1   78.12    2.10
   6   2   1   81.80    1.79
  -6   2  -1   81.03    2.12
  -6  -2  -1   79.38    2.05
   6  -2   1   81.22    1.47
  -6   2  -2  261.91    4.21
  -6  -2  -2  248.33    4.05
  -6   2  -2  263.36    4.26
   6  -2   2  256.10    3.18
   6  -2   2  260.64    3.29
   6   2   2  252.81    3.64
   6  -2   2  245.76    4.19
   6  -2   2  254.97    3.29
   6  -2   2  260.53    3.13
   6  -2   3  163.27    2.25
  -6  -2  -3  161.71    3.03
  -6   2  -3  158.59    3.07
   6   2   3  168.31    3.26
   6   2   3  169.34    3.33
  -6   2  -3  168.97    3.20
   6  -2   3  159.60    2.07
  -6  -2  -3  169.70    2.87
   6  -2   3  165.93    3.18
   6  -2   3  161.20    2.12
   6   2   3  167.81    2.67
  -6  -2  -4    0.03    0.47
   6   2   4    0.34    0.55
  -6   2  -4    0.43    0.51
  -6  -2  -4    0.06    0.39
   6  -2   4    0.91    0.54
   6   2   4   -0.54    0.50
   6  -2   4    0.59    0.28
   6   2   4    1.12    0.41
  -6  -2  -5   34.00    1.30
  -6   2  -5   36.19    1.31
   6   2   5   32.83    1.41
   6   2   5   34.70    1.45
  -6   2  -5   34.20    1.32
  -6  -2  -5   34.02    1.14
   6  -2   5   34.08    1.37
   6   2   5   33.99    1.10
   6  -2   5   33.14    0.96
   6   2   5   33.15    1.37
   6   2   6   20.43    1.16
  -6   2  -6   21.45    1.00
  -6  -2  -6   21.11    1.08
   6   2   6   21.43    1.19
   6   2   6   22.31    1.19
  -6  -2  -6   22.11    0.93
   6  -2   6   21.25    1.09
   6  -2   6   25.40    0.92
   6   2   6   21.31    0.91
   6   2   7  102.23    2.63
  -6  -2  -7  102.57    2.40
  -6   2  -7  102.09    2.12
   6   2   7  102.69    2.51
   6   2   7  109.17    2.53
  -6  -2  -7  106.96    2.07
   6  -2   7  104.83    2.35
   6   2   7  103.46    2.05
   6  -2   7  105.23    2.11
   6   2   8   41.87    1.77
   6   2   8   45.25    1.65
  -6  -2  -8   43.71    1.58
  -6   2  -8   44.28    1.29
   6   2   8   44.90    1.60
  -6  -2  -8   47.44    1.32
   6  -2   8   43.98    1.47
   6   2   8   45.25    1.30
   6  -2   8   45.48    1.46
   6   2   9  125.96    3.14
  -6   2  -9  125.86    2.24
   6   2   9  125.40    2.78
   6   2   9  129.44    2.68
  -6  -2  -9  125.24    2.28
   6  -2   9  128.46    2.53
   6   2   9  123.97    2.29
   6  -2   9  124.41    2.67
   6   2  10   34.45    1.45
   6   2  10   34.19    1.30
   6  -2  10   34.67    1.22
   6  -2  10   31.97    1.45
   6   2  10   30.15    1.64
  -6  -2 -10   32.00    1.10
   6   2  11   60.14    2.29
   6   2  11   60.01    1.58
   6  -2  11   59.75    1.43
   6   2  11   64.62    1.64
   6  -2  11   58.61    2.03
   6  -2  12   12.41    1.17
   6   2  12   14.40    1.41
  -6  -3  13   11.48    0.75
   6  -3 -13   11.23    1.45
  -6   3  13   10.54    1.14
   6  -3 -12    5.71    1.19
  -6  -3  12    5.12    0.64
  -6   3  12    5.61    0.79
  -6   3  12    6.86    0.99
   6  -3 -12    5.25    0.83
  -6   3  12    4.18    1.23
  -6  -3  11  253.51    3.91
   6   3 -11  253.53    4.15
  -6   3  11  256.47    4.33
  -6  -3  11  261.54    5.58
   6  -3 -11  254.23    4.53
   6  -3 -11  259.14    5.42
  -6   3  11  252.92    5.54
   6  -3 -10   38.86    1.93
  -6  -3  10   40.09    1.43
  -6   3  10   40.10    1.62
   6   3 -10   40.42    1.57
  -6  -3  10   38.35    2.09
   6  -3 -10   39.98    1.69
   6  -3 -10   42.08    2.13
  -6   3  10   40.88    2.15
   6  -3  -9   61.18    2.24
  -6  -3   9   59.63    1.76
   6   3  -9   58.27    1.90
  -6   3   9   59.37    1.95
  -6  -3   9   63.69    2.47
   6  -3  -9   60.21    2.07
   6  -3  -9   59.77    2.38
   6   3  -9   58.15    2.41
  -6   3   9   62.99    2.46
   6  -3  -8  152.17    3.44
  -6  -3   8  162.94    3.07
  -6   3   8  158.98    3.28
   6   3  -8  149.69    3.19
   6   3  -8  163.02    3.60
  -6  -3   8  159.28    3.82
   6  -3  -8  159.42    3.37
   6  -3  -8  158.31    3.76
   6   3  -8  153.19    3.77
  -6   3   8  158.46    3.77
   6  -3  -7  634.06    8.28
  -6  -3   7  612.36    7.81
   6   3  -7  621.47    8.18
  -6   3   7  607.12    8.11
   6   3  -7  617.58    8.44
  -6  -3   7  624.44    8.78
   6  -3  -7  617.17    8.28
   6  -3  -7  599.91    8.66
  -6   3   7  621.14    8.66
   6   3  -7  625.93    8.83
  -6  -3   6  465.10    6.33
   6   3  -6  478.55    6.70
  -6   3   6  467.79    6.62
  -6  -3   6  464.61    7.00
   6   3  -6  472.52    6.82
   6  -3  -6  468.95    6.72
   6  -3  -6  463.81    6.47
  -6   3   6  455.18    6.77
   6   3  -6  449.85    7.02
  -6  -3   5  209.48    3.67
   6   3  -5  208.72    3.91
   6   3  -5  202.19    3.67
  -6   3   5  206.09    3.83
   6   3  -5  210.69    3.92
   6  -3  -5  213.29    3.95
  -6   3   5  207.01    3.80
   6  -3  -5  207.24    3.59
   6  -3  -4   27.87    1.14
  -6  -3   4   29.33    1.27
   6   3  -4   28.37    1.40
  -6   3   4   26.40    1.32
   6   3  -4   30.88    1.33
   6   3  -4   28.16    1.32
   6  -3  -4   25.59    1.32
   6  -3  -4   27.81    1.34
  -6   3   4   27.63    1.23
   6   3  -3  205.33    3.68
   6  -3  -3  198.25    3.78
   6   3  -3  198.09    3.80
   6  -3  -3  201.70    3.63
  -6   3   3  196.56    3.29
   6  -3  -3  195.78    3.13
   6   3  -2  694.49    8.72
  -6   3   2  698.66    8.82
   6   3  -2  679.29    8.90
   6  -3  -2  683.61    8.83
   6  -3  -2  699.15    8.45
   6  -3  -2  685.09    7.79
  -6   3   2  685.87    7.90
   6   3  -1 4092.58   40.84
  -6  -3   1 4084.66   40.61
  -6   3   1 4055.64   40.89
   6   3  -1 4034.23   41.10
  -6   3   1 3991.14   39.46
   6   3  -1 4022.97   40.48
   6   3  -1 4013.63   40.70
   6  -3  -1 4041.05   40.95
   6  -3  -1 4124.06   40.22
   6  -3  -1 4038.74   39.43
   6   3   0  115.53    2.67
  -6  -3   0  114.87    2.52
  -6   3   0  118.24    2.68
   6   3   0  112.47    2.77
  -6   3   0  117.46    2.68
   6   3   0  116.27    2.37
   6  -3   0  111.21    2.66
   6  -3   0  116.58    2.20
   6  -3   0  114.27    1.73
   6   3   1   59.64    1.87
  -6  -3  -1   55.45    1.71
  -6   3  -1   58.73    1.84
  -6   3  -1   58.45    1.83
   6   3   1   58.78    1.56
  -6  -3  -1   60.54    1.74
   6  -3   1   58.25    1.36
   6  -3   1   59.89    0.97
   6  -3   2    4.19    0.68
   6   3   2    5.38    0.60
   6  -3   2    5.44    0.42
  -6  -3  -2    4.47    0.65
  -6   3  -2    4.67    0.68
  -6   3  -2    4.58    0.69
   6   3   3 1502.73   16.77
  -6   3  -3 1483.50   16.47
   6  -3   3 1504.34   14.76
  -6  -3  -3 1501.34   16.12
   6  -3   3 1459.56   16.52
   6   3   3 1461.67   16.59
  -6  -3  -3 1483.91   16.29
   6  -3   3 1494.16   14.78
   6   3   3 1502.26   15.82
   6   3   4   25.28    1.27
   6   3   4   24.84    1.30
  -6  -3  -4   27.18    1.23
  -6   3  -4   28.22    1.22
  -6   3  -4   27.93    1.27
   6   3   4   26.02    1.33
   6  -3   4   25.90    0.56
  -6  -3  -4   27.58    1.15
   6  -3   4   27.45    1.26
   6  -3   4   25.49    0.58
   6   3   4   28.24    1.10
   6   3   5  154.34    3.25
   6   3   5  158.55    3.25
  -6   3  -5  158.52    2.97
  -6  -3  -5  159.42    3.11
   6   3   5  156.59    3.28
  -6   3  -5  153.02    3.08
  -6  -3  -5  160.98    2.90
   6  -3   5  152.46    3.10
   6  -3   5  156.36    2.15
   6   3   5  157.67    2.81
   6   3   6  543.23    7.56
   6   3   6  536.05    7.38
  -6   3  -6  553.14    6.87
  -6  -3  -6  538.05    7.24
   6   3   6  530.87    7.38
  -6   3  -6  540.34    7.10
  -6  -3  -6  544.45    6.82
   6  -3   6  541.05    7.19
   6  -3   6  548.84    6.17
   6   3   6  538.36    6.79
   6   3   7  694.68    9.43
  -6   3  -7  708.93    8.35
   6   3   7  715.24    9.12
  -6  -3  -7  721.26    9.05
   6   3   7  726.82    9.11
  -6   3  -7  721.67    8.72
  -6  -3  -7  701.94    8.45
   6  -3   7  715.00    8.82
   6   3   7  711.21    8.49
   6  -3   7  720.26    8.09
   6   3   8  200.91    4.11
   6   3   8  209.95    3.88
  -6   3  -8  198.63    3.08
   6   3   8  194.95    3.69
  -6  -3  -8  199.81    3.32
   6  -3   8  199.10    3.54
   6   3   8  199.35    3.35
   6  -3   8  197.52    3.21
   6   3   9  215.39    4.45
  -6   3  -9  218.65    3.16
   6   3   9  220.95    4.05
   6   3   9  224.88    3.91
  -6  -3  -9  220.75    3.55
   6  -3   9  219.72    3.67
   6   3   9  219.24    3.57
   6  -3   9  220.05    3.64
   6   3  10   83.79    2.71
   6   3  10   80.80    2.31
   6   3  10   89.35    2.20
  -6  -3 -10   90.30    2.05
   6  -3  10   85.58    2.00
   6   3  10   85.58    2.04
   6   3  10   87.62    2.10
   6  -3  10   84.25    2.20
   6   3  11   73.73    1.90
   6   3  11   71.97    2.59
   6   3  11   75.93    2.19
   6   3  11   72.49    1.85
   6  -3  11   69.84    1.60
   6  -3  11   73.96    2.17
   6   3  12    2.17    1.03
   6  -3  12    3.28    0.82
   6  -4 -13    4.20    1.28
  -6  -4  12    1.06    0.54
  -6   4  12    0.65    0.68
   6  -4 -12    0.74    1.06
   6  -4 -12    0.64    0.76
  -6   4  12    0.53    1.10
  -6  -4  11   17.96    0.93
  -6   4  11   13.04    1.08
   6   4 -11   15.01    1.03
   6  -4 -11   13.72    1.19
   6  -4 -11   15.01    1.58
  -6   4  11   13.98    1.54
  -6  -4  10   88.45    2.04
  -6   4  10   87.37    2.42
   6   4 -10   88.27    2.35
  -6  -4  10   86.36    3.05
   6  -4 -10   87.88    2.59
   6  -4 -10   81.58    2.93
  -6   4  10   87.90    3.04
   6  -4  -9  353.42    5.93
  -6  -4   9  357.63    5.02
   6   4  -9  350.58    5.48
  -6   4   9  350.28    5.55
  -6  -4   9  339.56    6.32
   6  -4  -9  355.90    5.82
   6  -4  -9  360.13    6.38
   6   4  -9  362.00    6.39
  -6   4   9  358.39    6.36
   6  -4  -8    0.97    0.90
  -6  -4   8    1.47    0.62
   6   4  -8    0.46    0.65
   6   4  -8    1.80    0.83
   6  -4  -8    0.88    0.81
  -6   4   8    1.80    0.74
   6   4  -8   -0.05    0.84
  -6   4   8    0.80    0.81
  -6  -4   8    0.20    0.89
   6  -4  -8    0.74    0.75
  -6  -4   7  107.78    2.39
  -6   4   7  103.89    2.65
   6   4  -7  102.35    2.66
   6   4  -7  109.62    2.84
  -6  -4   7  101.90    2.98
   6  -4  -7  105.21    2.83
   6   4  -7  112.05    3.11
  -6   4   7  102.58    2.88
   6  -4  -7  107.52    2.69
  -6  -4   6   20.56    1.08
  -6   4   6   21.08    1.27
   6   4  -6   22.02    1.31
   6   4  -6   20.96    1.18
   6   4  -6   20.47    1.29
   6  -4  -6   21.54    1.34
   6   4  -6   22.73    1.44
  -6   4   6   22.76    1.36
   6  -4  -6   19.13    1.12
  -6  -4   5  116.73    2.55
   6   4  -5  116.49    2.67
   6   4  -5  122.51    2.92
  -6   4   5  120.66    2.85
   6   4  -5  113.90    2.81
   6  -4  -5  115.97    2.90
   6  -4  -5  116.48    2.53
   6   4  -5  118.08    3.06
  -6   4   5  118.90    2.73
   6  -4  -4    4.61    0.76
  -6  -4   4    4.32    0.70
   6   4  -4    4.57    0.78
   6   4  -4    3.41    0.69
   6   4  -4    4.35    0.78
   6  -4  -4    4.78    0.84
  -6   4   4    4.64    0.68
   6  -4  -4    4.18    0.59
  -6  -4   3    0.99    0.56
   6   4  -3    1.58    0.62
   6  -4  -3    0.06    0.39
   6  -4  -3    0.59    0.61
   6  -4  -3    0.28    0.55
  -6   4   3   -0.14    0.44
   6  -4  -2   29.40    0.95
   6   4  -2   29.15    1.36
  -6   4   2   30.87    1.42
   6  -4  -2   30.25    1.47
   6  -4  -2   30.63    1.29
  -6   4   2   30.40    1.02
   6  -4  -1    2.77    0.36
   6   4  -1    3.53    0.72
   6   4  -1    4.79    0.67
  -6   4   1    3.65    0.74
   6  -4  -1    2.87    0.73
   6  -4  -1    4.56    0.63
  -6   4   1    3.12    0.38
  -6   4   0  882.69   10.93
   6   4   0  914.63   10.97
  -6  -4   0  911.77   10.69
   6   4   0  908.08   10.47
  -6  -4   0  896.39   10.83
   6  -4   0  901.08   10.15
   6  -4   0  901.76    9.07
  -6   4  -1   76.08    2.18
  -6  -4  -1   81.73    2.16
   6   4   1   79.49    1.94
  -6  -4  -1   78.90    2.09
   6   4   1   81.14    2.26
   6  -4   1   76.24    1.66
  -6   4  -2  588.41    7.62
  -6   4  -2  563.78    7.63
  -6  -4  -2  563.96    7.45
   6  -4   2  581.26    7.82
  -6  -4  -2  564.89    7.45
   6  -4   2  575.96    6.44
   6   4   2  572.84    7.16
  -6   4  -3   81.19    2.21
  -6   4  -3   76.58    2.09
  -6  -4  -3   79.24    2.09
   6  -4   3   78.26    2.26
  -6  -4  -3   77.46    2.12
   6   4   3   76.15    1.91
   6  -4   3   77.12    1.24
  -6  -4  -4   66.31    1.97
  -6   4  -4   66.19    1.90
   6   4   4   65.85    2.07
  -6   4  -4   64.85    1.97
  -6  -4  -4   61.50    1.84
   6  -4   4   62.85    1.99
   6   4   4   62.21    2.04
   6   4   4   63.84    1.78
  -6   4  -5  137.89    2.77
   6   4   5  132.99    3.05
  -6  -4  -5  138.78    3.02
  -6   4  -5  136.59    2.91
  -6  -4  -5  133.60    2.76
   6  -4   5  132.17    2.98
   6   4   5  132.88    2.71
   6   4   5  132.28    3.12
   6   4   6  533.12    7.71
  -6   4  -6  537.22    6.86
   6   4   6  559.23    7.53
  -6  -4  -6  544.46    7.45
  -6   4  -6  535.82    7.16
   6   4   6  549.31    7.54
  -6  -4  -6  545.13    7.03
   6  -4   6  549.96    7.38
   6  -4   6  521.93    5.57
   6   4   6  550.57    7.03
   6   4   7  160.42    3.65
  -6   4  -7  157.79    2.83
   6   4   7  160.19    3.40
   6   4   7  157.44    3.36
  -6   4  -7  155.70    3.08
  -6  -4  -7  158.33    3.05
   6  -4   7  157.94    3.22
   6  -4   7  155.98    2.28
   6   4   7  157.67    3.06
   6   4   8   43.79    1.95
   6   4   8   49.69    1.85
  -6   4  -8   40.90    1.26
   6   4   8   47.47    1.79
  -6   4  -8   41.55    1.49
  -6  -4  -8   44.40    1.55
   6  -4   8   40.63    1.56
   6   4   8   42.85    1.54
   6  -4   8   42.61    1.19
   6   4   9   31.44    1.76
   6   4   9   31.02    1.53
  -6   4  -9   29.55    0.98
   6   4   9   29.60    1.44
  -6  -4  -9   33.01    1.35
   6  -4   9   29.64    1.33
   6   4   9   31.00    1.34
   6   4   9   30.65    1.37
   6  -4   9   30.31    1.12
   6   4  10    8.15    1.24
   6   4  10    8.13    0.86
   6   4  10   10.78    0.96
   6   4  10    9.22    1.02
  -6  -4 -10    7.96    0.84
   6  -4  10    9.20    0.82
   6   4  10    9.74    0.92
   6  -4  10    8.22    0.80
   6   4  11    4.52    1.10
   6  -4  11    6.18    0.64
   6   4  11    5.14    0.80
   6  -4  11    5.58    0.77
   6   4  11    5.78    0.93
   6   4  11    4.79    0.76
   6  -5 -13   31.60    2.18
  -6   5  12   55.02    2.65
  -6  -5  12   52.94    1.49
  -6   5  12   55.44    1.96
  -6  -5  12   56.96    2.67
   6  -5 -12   51.68    2.04
   6  -5 -12   56.25    2.66
  -6   5  11   11.88    1.12
   6   5 -11   13.50    1.06
  -6  -5  11   12.06    0.83
   6  -5 -11   12.21    1.21
   6  -5 -11   12.86    1.52
  -6   5  11   14.55    1.54
  -6   5  10  370.16    5.89
   6   5 -10  377.05    5.81
  -6  -5  10  379.65    5.17
   6  -5 -10  380.95    6.26
   6  -5 -10  376.50    6.91
  -6   5  10  382.64    6.90
   6  -5  -9  614.23    8.63
   6   5  -9  605.03    8.19
  -6   5   9  591.49    8.20
  -6  -5   9  596.05    7.44
   6  -5  -9  612.35    8.67
   6  -5  -9  599.43    9.17
  -6   5   9  593.65    9.00
   6  -5  -8  918.96   11.58
  -6  -5   8  929.82   10.69
  -6   5   8  923.58   11.46
   6   5  -8  934.77   11.50
   6  -5  -8  927.34   11.84
   6  -5  -8  931.64   12.26
   6   5  -8  908.91   12.24
  -6   5   8  926.71   12.05
  -6  -5   7   53.00    1.67
  -6   5   7   51.26    1.92
   6   5  -7   52.61    1.94
   6   5  -7   52.54    1.77
   6   5  -7   52.86    2.01
   6  -5  -7   50.96    2.06
   6  -5  -7   48.15    1.86
   6   5  -7   52.02    2.20
  -6   5   7   50.65    2.05
  -6  -5   6  859.24   10.07
  -6   5   6  829.00   10.63
   6   5  -6  854.31   10.75
   6  -5  -6  837.02   10.99
   6   5  -6  832.03   11.16
  -6   5   6  847.60   10.70
   6  -5  -6  835.29   10.30
   6  -5  -5  205.06    3.62
   6   5  -5  212.35    3.88
  -6  -5   5  210.05    3.65
  -6   5   5  204.59    3.99
   6  -5  -5  208.81    4.26
   6   5  -5  208.54    4.30
  -6   5   5  216.65    3.89
   6  -5  -5  207.75    4.18
   6   5  -5  209.05    4.02
   6  -5  -4   35.19    1.26
   6   5  -4   30.52    1.45
   6   5  -4   35.35    1.49
  -6  -5   4   31.14    1.33
   6  -5  -4   32.24    1.65
   6  -5  -4   32.53    1.54
  -6   5   4   33.56    1.34
   6   5  -4   32.15    1.63
   6  -5  -3  174.57    2.87
  -6  -5   3  178.48    3.34
   6   5  -3  179.94    3.55
   6   5  -3  168.60    3.68
   6   5  -3  180.48    3.49
   6  -5  -3  181.76    3.86
   6  -5  -3  176.37    3.51
  -6   5   3  169.17    2.99
   6  -5  -2  147.61    2.37
   6   5  -2  146.08    3.15
  -6   5   2  146.63    3.22
   6  -5  -2  148.51    3.44
  -6   5   2  146.54    2.47
   6  -5  -2  149.60    3.02
   6  -5  -1  312.15    3.75
   6   5  -1  325.78    5.14
  -6   5   1  318.53    5.15
  -6  -5   1  310.93    5.18
   6  -5  -1  320.47    5.42
  -6   5   1  318.25    3.84
   6  -5  -1  303.13    4.66
  -6   5   0   15.96    1.13
  -6  -5   0   14.55    1.01
   6   5   0   14.96    1.11
   6  -5   0   15.78    0.88
  -6  -5   0   16.64    1.12
   6   5   0   15.07    0.99
  -6   5  -1  576.21    7.95
  -6  -5  -1  603.27    8.01
  -6  -5  -1  586.35    7.83
   6   5   1  604.65    8.07
   6  -5   1  608.14    7.09
   6   5   1  597.02    7.61
  -6   5  -2  184.24    3.67
  -6  -5  -2  191.59    3.68
   6  -5   2  195.85    3.96
  -6  -5  -2  189.69    3.64
   6   5   2  197.86    3.48
   6  -5   2  189.41    2.79
  -6   5  -3  279.16    4.55
  -6   5  -3  275.43    4.69
  -6  -5  -3  269.96    4.59
   6  -5   3  275.14    4.87
  -6  -5  -3  269.75    4.64
   6  -5   3  277.79    3.34
   6   5   3  277.10    4.40
   6   5   4 1080.09   12.79
  -6  -5  -4 1062.45   12.72
  -6   5  -4 1062.06   12.56
  -6   5  -4 1055.38   12.30
  -6  -5  -4 1083.39   12.50
   6  -5   4 1051.48   12.82
   6   5   4 1040.54   12.85
   6   5   4 1077.71   12.27
   6   5   5  138.69    3.23
  -6   5  -5  142.73    2.93
  -6  -5  -5  143.41    3.27
  -6   5  -5  142.61    3.10
  -6  -5  -5  147.79    3.10
   6  -5   5  146.76    3.26
   6   5   5  147.23    3.44
   6   5   5  145.47    3.00
  -6   5  -6  159.88    3.02
   6   5   6  163.20    3.50
  -6   5  -6  161.43    3.28
  -6  -5  -6  158.81    3.22
   6  -5   6  158.37    3.42
   6   5   6  152.90    3.66
   6   5   6  161.59    3.24
   6   5   7   21.33    1.36
  -6   5  -7   22.19    1.05
  -6   5  -7   21.65    1.19
  -6  -5  -7   25.15    1.28
   6  -5   7   22.10    1.29
   6   5   7   19.75    1.21
   6   5   7   20.29    1.47
   6   5   8   92.68    2.90
  -6   5  -8   88.64    1.93
   6   5   8   89.23    2.58
  -6   5  -8   90.87    2.31
   6   5   8   89.28    2.54
  -6  -5  -8   91.00    2.36
   6  -5   8   91.34    1.44
   6  -5   8   91.58    2.45
   6   5   8   96.16    2.48
   6   5   8   88.95    2.39
   6   5   9   -0.07    0.64
   6   5   9    0.23    0.78
   6   5   9    0.04    0.71
   6   5   9    0.10    0.88
  -6  -5  -9    1.12    0.68
   6   5   9   -0.17    0.69
   6  -5   9   -0.16    0.66
   6  -5   9    0.37    0.39
   6   5  10   47.50    1.89
   6   5  10   46.26    1.79
   6   5  10   44.98    2.21
  -6  -5 -10   49.90    1.75
   6   5  10   48.01    1.78
   6   5  10   45.58    1.74
   6  -5  10   47.58    1.60
   6  -5  10   44.47    1.30
   6   5  11    9.44    1.28
   6  -5  11    8.71    0.76
   6  -5  11    8.78    0.76
   6   5  11    9.16    0.96
   6  -6 -12   14.48    1.65
   6  -6 -12   15.45    1.35
  -6   6  12   15.58    1.75
  -6   6  11   52.77    2.58
   6   6 -11   56.82    1.97
  -6  -6  11   57.58    1.66
   6  -6 -11   56.83    2.26
   6  -6 -11   53.81    2.58
  -6   6  10   45.52    2.31
  -6  -6  10   49.70    1.58
  -6   6  10   49.53    1.98
   6   6 -10   48.59    1.89
   6  -6 -10   48.41    2.12
   6   6 -10   51.11    1.79
   6  -6 -10   45.53    2.34
   6  -6  -9    0.96    1.08
  -6  -6   9    0.67    0.63
   6   6  -9    0.32    0.74
  -6   6   9    0.36    0.92
  -6   6   9    0.97    0.85
   6  -6  -9    4.06    1.03
   6  -6  -9    1.81    0.89
  -6  -6   8  687.80    8.54
   6  -6  -8  685.90    9.76
  -6   6   8  689.82    9.31
   6   6  -8  690.56    9.28
   6   6  -8  705.32    8.85
   6  -6  -8  688.36    9.32
  -6   6   8  703.19    9.75
  -6  -6   7  291.47    4.53
  -6   6   7  285.09    5.04
   6   6  -7  293.05    4.78
   6  -6  -7  288.57    5.44
   6  -6  -7  284.88    4.92
  -6   6   7  287.60    5.18
   6   6  -7  285.18    5.53
  -6   6   6   11.70    1.10
   6   6  -6   10.85    1.21
   6  -6  -6   10.45    0.98
   6   6  -6   11.88    1.07
  -6  -6   6   11.52    0.96
  -6   6   6   11.01    1.10
   6   6  -6    9.97    1.11
   6  -6  -6   11.06    1.22
   6  -6  -6    9.53    1.22
   6  -6  -5  248.66    4.06
   6   6  -5  241.51    4.43
  -6  -6   5  237.12    4.10
   6   6  -5  245.45    4.34
  -6   6   5  246.33    4.55
   6  -6  -5  253.79    4.94
  -6   6   5  247.22    4.25
   6   6  -5  240.68    4.85
   6  -6  -5  232.77    4.62
   6  -6  -4  241.23    3.82
  -6  -6   4  248.42    4.18
   6   6  -4  241.62    4.34
   6   6  -4  249.45    4.41
   6  -6  -4  235.16    4.78
  -6   6   4  244.39    4.02
   6   6  -4  246.67    4.77
   6  -6  -4  237.69    4.51
   6  -6  -3    3.96    0.78
   6   6  -3    3.83    0.79
  -6  -6   3    2.48    0.68
   6  -6  -3    5.71    0.95
   6  -6  -3    3.81    0.54
   6   6  -3    3.87    0.88
  -6   6   3    3.17    0.57
   6   6  -3    2.60    0.72
   6  -6  -2   29.51    0.94
  -6  -6   2   29.50    1.38
   6   6  -2   29.06    1.45
   6   6  -2   31.70    1.58
   6  -6  -2   31.04    1.64
  -6   6   2   30.52    1.51
  -6   6   2   27.91    1.00
   6  -6  -2   34.04    1.45
   6   6  -1    3.36    0.79
  -6   6   1    3.18    0.80
   6  -6  -1    2.48    0.81
  -6  -6   1    3.97    0.85
  -6   6   1    3.48    0.39
   6  -6  -1    3.86    0.67
  -6  -6   0   99.21    2.70
  -6  -6   0  103.59    2.62
   6   6   0   97.08    2.63
   6  -6   0   98.43    2.23
   6   6   0   98.04    2.45
  -6   6   0   99.67    2.67
  -6  -6  -1   80.88    2.42
  -6   6  -1   77.00    2.35
  -6  -6  -1   81.11    2.35
   6   6   1   82.63    2.39
   6   6   1   80.55    2.19
   6  -6   1   80.82    1.85
  -6   6  -2   85.26    2.42
  -6  -6  -2   87.11    2.47
   6  -6   2   82.24    2.60
   6   6   2   84.76    2.45
  -6  -6  -2   79.80    2.41
   6   6   2   86.91    2.28
   6  -6   2   86.42    1.75
  -6   6  -3  123.63    2.96
  -6  -6  -3  127.77    3.00
   6  -6   3  125.41    3.19
  -6  -6  -3  119.35    3.03
   6   6   3  124.23    2.83
   6  -6   3  124.69    1.96
  -6   6  -4  502.66    7.01
  -6   6  -4  510.33    7.23
   6  -6   4  503.04    5.40
  -6  -6  -4  530.67    7.33
   6  -6   4  510.84    7.61
   6   6   4  519.84    7.41
   6   6   4  541.83    7.19
   6   6   5  420.98    6.45
  -6   6  -5  427.01    6.30
  -6   6  -5  412.59    5.96
  -6  -6  -5  424.71    6.30
   6  -6   5  415.17    6.54
   6   6   5  411.03    6.16
   6   6   5  416.13    6.78
   6   6   6  110.27    3.17
   6   6   6  116.41    2.95
  -6   6  -6  109.25    2.52
  -6   6  -6  113.89    2.77
  -6  -6  -6  110.09    2.76
   6  -6   6  117.98    3.02
   6   6   6  113.86    2.86
   6   6   6  114.24    2.82
   6   6   7   98.81    3.04
   6   6   7   97.33    2.75
  -6   6  -7   95.91    2.21
  -6   6  -7   99.56    2.55
  -6  -6  -7   99.79    2.64
   6  -6   7   97.23    2.67
   6   6   7   99.35    2.65
   6   6   7   98.14    2.63
  -6   6  -8   14.61    0.87
   6   6   8   11.49    1.17
  -6   6  -8   14.98    1.08
   6  -6   8   15.01    1.17
   6   6   8   14.71    1.18
   6   6   8   13.64    1.12
  -6  -6  -8   14.11    1.17
  -6  -6  -9   71.63    2.23
   6   6   9   70.06    2.24
   6   6   9   71.43    2.29
   6  -6   9   71.56    2.17
   6   6   9   68.99    2.70
  -6  -6 -10    5.13    0.91
   6  -6  10    6.25    0.84
   6   6  10    4.97    0.92
   6   6  10    5.68    1.23
   6   6  10    6.04    0.98
   6   6  11   68.35    2.21
   6  -7 -11    5.64    1.39
   6  -7 -11    5.29    1.17
  -6   7  11    7.86    1.46
   6  -7 -10   11.66    1.46
   6   7 -10   14.06    1.22
  -6   7  10   14.13    1.57
   6  -7 -10   11.87    1.33
  -6  -7   9    0.03    0.65
   6   7  -9    0.13    0.85
   6   7  -9   -0.48    0.71
   6   7  -9    0.34    0.80
   6  -7  -9   -0.05    0.93
  -6   7   9    0.58    1.00
  -6  -7   8   56.62    1.85
   6   7  -8   51.16    1.84
   6  -7  -8   50.39    2.31
  -6   7   8   50.74    2.19
   6   7  -8   57.17    2.02
   6  -7  -8   50.92    2.05
   6  -7  -7  175.99    4.25
   6  -7  -7  177.45    3.71
  -6   7   7  187.44    3.98
   6   7  -7  174.42    3.59
  -6  -7   7  173.30    3.46
   6   7  -6   14.98    1.16
  -6  -7   6   14.08    1.09
   6  -7  -6   14.07    1.38
  -6   7   6   15.11    1.29
   6  -7  -6   14.36    1.09
   6   7  -6   14.72    1.40
  -6   7   6   14.81    1.21
   6  -7  -6   15.45    1.39
   6   7  -5  563.45    7.73
  -6  -7   5  535.85    7.52
   6  -7  -5  554.43    7.27
   6  -7  -5  567.47    8.60
  -6   7   5  572.69    8.10
   6   7  -5  549.67    8.40
  -6   7   5  557.41    7.54
   6  -7  -5  548.71    8.23
   6   7  -4   54.96    1.98
  -6  -7   4   52.83    1.88
   6   7  -4   54.99    1.97
   6  -7  -4   53.02    1.60
   6  -7  -4   52.53    2.28
   6  -7  -4   52.44    2.05
  -6   7   4   53.95    1.73
   6   7  -4   50.04    2.11
   6   7  -3   11.39    1.12
  -6   7   3   12.82    0.86
   6   7  -3   12.37    1.09
  -6  -7   3   11.45    1.05
   6   7  -3   11.30    1.05
   6  -7  -3   11.76    0.77
   6  -7  -3    9.84    1.20
   6  -7  -3   11.94    1.10
  -6  -7   2 1128.04   13.45
   6   7  -2 1124.05   13.47
   6  -7  -2 1146.06   14.32
  -6   7   2 1146.89   13.69
  -6  -7   2 1132.48   13.94
   6   7  -2 1145.99   13.82
   6   7  -2 1109.91   13.27
  -6   7   2 1137.12   12.16
   6  -7  -2 1121.56   13.25
   6   7  -1   86.79    2.51
  -6   7   1   86.77    2.57
   6  -7  -1   83.63    2.82
  -6  -7   1   89.26    2.71
  -6   7   1   88.30    1.56
   6  -7  -1   87.99    2.29
  -6  -7   0  222.54    4.43
   6   7   0  224.02    4.26
   6  -7   0  222.13    3.77
  -6   7   0  221.85    4.33
  -6  -7  -1  601.34    8.47
   6   7   1  612.67    8.36
  -6  -7  -1  609.79    8.48
   6  -7   1  589.68    7.37
   6   7   1  590.28    8.04
  -6   7  -1  621.47    8.43
  -6  -7  -2   26.67    1.53
   6   7   2   26.68    1.51
   6  -7   2   26.62    1.04
   6   7   2   27.25    1.43
   6  -7   2   27.12    1.65
  -6   7  -2   25.88    1.47
   6  -7   3  381.24    6.54
  -6   7  -3  401.39    6.21
  -6  -7  -3  397.01    6.27
   6   7   3  400.51    6.07
   6  -7   3  394.67    4.83
   6   7   4  124.97    3.16
  -6   7  -4  129.40    3.10
   6  -7   4  129.99    1.95
  -6  -7  -4  125.64    3.15
   6  -7   4  130.36    3.37
   6   7   4  130.43    3.19
   6   7   4  133.57    3.10
   6   7   5    2.30    0.82
  -6   7  -5    2.31    0.71
  -6  -7  -5    2.09    0.79
  -6   7  -5    0.83    0.71
   6  -7   5    1.70    0.86
   6   7   5    1.31    0.83
   6   7   5    1.68    0.81
   6   7   6  150.15    3.84
   6   7   6  148.32    3.52
  -6   7  -6  148.42    3.03
  -6   7  -6  146.95    3.30
  -6  -7  -6  146.60    3.40
   6  -7   6  148.09    3.57
   6   7   6  147.66    3.47
   6   7   6  148.38    3.41
  -6   7  -7    0.22    0.57
  -6   7  -7    0.33    0.73
   6  -7   7    0.60    0.76
   6   7   7   -0.38    0.96
  -6  -7  -7   -0.24    0.75
   6  -7   8  319.39    5.43
   6   7   8  321.16    6.16
  -6  -7  -8  309.42    5.39
   6  -7   9  146.92    3.32
   6   7   9  150.56    4.07
  -6  -7  -9  145.15    3.43
  -6  -7 -10   35.64    1.74
   6  -7  10   35.28    1.55
   6  -8 -11   92.41    3.09
  -6   8  11   87.67    3.26
   6   8 -10   67.65    2.35
   6  -8 -10   63.45    2.82
   6  -8 -10   62.83    2.59
  -6   8  10   61.38    2.63
   6  -8  -9   21.80    1.72
  -6   8   9   16.58    1.62
   6  -8  -8   28.26    1.62
   6   8  -8   30.87    1.55
   6  -8  -8   31.47    1.99
  -6   8   8   32.86    1.81
   6   8  -7 1954.28   21.46
   6  -8  -7 1952.10   22.86
   6  -8  -7 1987.10   21.56
  -6   8   7 2001.42   22.04
   6  -8  -7 1949.29   22.73
   6   8  -6   52.81    1.98
   6  -8  -6   51.44    1.83
   6  -8  -6   52.49    2.42
   6  -8  -6   48.50    2.22
  -6   8   6   52.20    2.00
   6  -8  -5    1.48    0.93
   6   8  -5    0.77    0.85
  -6  -8   5    0.46    0.82
  -6   8   5    1.41    0.75
   6  -8  -5    1.77    1.00
   6  -8  -5    0.29    0.64
   6   8  -4  692.37    9.25
  -6  -8   4  698.43    9.31
   6  -8  -4  701.94    9.59
   6  -8  -4  684.53   10.21
  -6   8   4  695.02    8.68
   6   8  -4  701.89    9.86
   6  -8  -4  692.53    8.39
   6  -8  -3    2.42    0.89
  -6  -8   3    2.43    0.87
   6   8  -3    3.75    0.86
   6  -8  -3    3.07    1.01
  -6   8   3    2.27    0.61
   6   8  -3    3.01    0.88
   6   8  -2  157.12    3.52
   6  -8  -2  155.70    4.06
  -6  -8   2  158.95    3.87
   6   8  -2  155.00    3.74
  -6   8   2  156.80    2.66
   6  -8  -2  156.76    3.40
   6   8  -1   96.88    2.73
   6  -8  -1  101.85    3.20
  -6   8   1   98.93    1.73
  -6  -8   1   93.25    2.90
   6  -8  -1   99.47    2.54
  -6  -8   0  426.28    6.94
   6   8   0  435.36    6.65
   6  -8   0  424.33    6.03
  -6  -8  -1  104.35    3.01
  -6   8  -1  110.81    2.93
   6   8   1  101.58    2.84
   6  -8   1  107.25    2.37
  -6   8  -2    0.67    0.79
  -6  -8  -2    0.05    0.83
   6  -8   2   -0.09    0.49
   6  -8   2   -0.58    0.85
   6   8   2    1.00    0.78
  -6   8  -3   33.53    1.71
   6  -8   3   33.55    1.89
  -6  -8  -3   33.77    1.75
   6  -8   3   33.74    1.10
   6  -8   4  104.29    3.17
  -6   8  -4  102.47    2.84
   6  -8   4  102.30    1.85
  -6  -8  -4  104.08    2.94
   6  -8   5   16.27    1.42
   6  -8   5   17.96    0.62
  -6  -8  -5   17.62    1.36
  -6   8  -5   16.70    1.29
  -6   8  -6    3.52    0.90
  -6  -8  -6    4.75    1.01
   6  -8   6    3.65    1.00
  -6   8  -6    1.77    0.73
  -6  -8  -7   10.71    1.20
   6   8   7    9.87    1.39
   6  -8   7   11.45    1.22
  -6   8  -7   13.98    1.20
  -6   8  -7   11.04    0.94
  -6  -8  -8    9.59    1.19
   6   8   8    9.41    1.39
   6  -8   8    9.36    1.13
   6  -8   9  400.47    6.39
  -6  -8  -9  399.86    6.56
  -6   9  10   15.96    1.70
   6  -9 -10   14.36    1.59
  -6   9   9    8.23    1.30
   6  -9  -9    8.96    1.40
   6  -9  -8    4.73    1.28
   6  -9  -8    4.37    1.23
  -6   9   8    4.00    1.11
  -6   9   7   63.04    2.37
   6  -9  -7   64.35    2.20
   6   9  -7   63.20    2.24
   6  -9  -7   63.38    2.74
   6  -9  -7   59.53    2.62
  -6   9   6   25.76    1.50
   6   9  -6   24.25    1.51
   6  -9  -6   23.81    1.34
   6  -9  -6   23.51    1.83
   6  -9  -6   23.58    1.75
   6   9  -5    6.69    1.04
   6  -9  -5    7.03    1.23
   6  -9  -5    8.86    1.36
  -6   9   5    8.38    0.99
   6   9  -4   97.69    2.75
   6  -9  -4   95.67    3.29
   6  -9  -4   94.72    2.88
  -6   9   4   94.35    2.38
   6  -9  -3    1.21    0.84
   6   9  -3    1.93    0.90
  -6   9   3    1.42    0.57
   6  -9  -3    0.36    0.98
  -6  -9   3    1.78    1.00
   6   9  -2   40.56    1.86
  -6  -9   2   42.61    2.11
   6  -9  -2   39.54    2.16
   6  -9  -2   39.73    1.78
  -6   9   2   40.71    1.28
   6  -9  -1    1.66    0.69
  -6  -9   1    3.33    1.02
   6   9  -1    3.33    0.95
   6  -9  -1    0.84    0.99
  -6   9   1    1.88    0.43
  -6  -9   0   22.17    1.62
  -6   9   0   21.16    1.22
   6  -9   0   20.23    1.22
  -6  -9  -1   42.63    2.05
  -6   9  -1   42.10    1.55
   6  -9   1   39.33    1.49
   6  -9   1   42.33    2.21
   6  -9   2  163.02    4.22
  -6  -9  -2  164.71    3.98
   6  -9   2  163.67    2.98
  -6  -9  -3  360.89    6.34
   6  -9   3  366.41    4.91
   6   9   3  358.53    6.46
   6  -9   3  361.22    6.65
   6  -9   4   47.48    1.31
  -6  -9  -4   45.92    2.13
   6   9   4   47.07    2.25
   6  -9   4   44.27    2.19
   6  -9   5   12.82    1.41
  -6  -9  -5   13.12    1.36
   6  -9   5   13.49    0.67
   6  -9   6   81.38    2.80
  -6  -9  -6   76.91    2.66
   6  -9   7   19.07    1.51
  -6  -9  -7   21.23    1.64
   6  -9   8   53.95    2.24
  -6  -9  -8   55.38    2.33
   6 -10  -8  334.83    6.77
  -6  10   8  341.75    6.22
   6 -10  -8  351.96    6.78
  -6  10   7  400.41    6.65
   6 -10  -7  408.41    7.61
   6 -10  -7  414.51    7.42
   6  10  -7  413.98    6.49
   6 -10  -6  398.89    7.13
  -6  10   6  415.42    6.48
   6 -10  -6  400.32    7.58
   6 -10  -5   72.22    2.71
  -6  10   5   70.96    2.24
   6 -10  -5   74.34    3.05
   6 -10  -4   49.57    2.20
   6 -10  -4   52.73    2.60
  -6  10   4   52.70    1.81
  -6 -10   3   75.24    2.88
   6 -10  -3   71.99    2.50
   6 -10  -3   73.76    3.01
  -6  10   3   70.63    1.92
  -6 -10   2   10.75    1.40
   6 -10  -2    9.58    1.13
   6 -10  -2   10.34    1.42
  -6  10   2    9.67    0.77
   6 -10  -1    4.51    1.25
  -6  10   1    3.58    0.86
   6 -10  -1    9.54    1.04
  -6 -10   1    8.18    1.29
  -6  10   0  340.25    5.42
  -6 -10   0  333.96    6.35
   6 -10   1    7.99    1.36
  -6  10  -1    6.89    0.90
  -6 -10  -1    7.63    1.26
   6 -10   1    8.04    0.90
   6 -10   2    1.61    1.03
   6 -10   2    0.86    0.64
  -6 -10  -2    1.51    0.98
   6 -10   3   19.93    1.72
   6  10   3   20.46    1.64
   6 -10   3   19.62    1.04
  -6 -10  -3   19.98    1.61
   6 -10   4    9.93    1.39
   6  10   4    8.96    1.34
  -6 -10  -4    8.49    1.27
   6 -10   4    9.27    0.78
   6 -10   5   26.82    1.83
   6  10   5   22.31    1.82
  -6 -10  -5   24.99    1.77
   6 -10   5   23.11    0.97
   6 -10   6   45.00    2.27
  -6 -10  -6   44.19    2.19
   6 -10   7    1.46    1.00
  -6 -10  -7    1.33    1.06
   6 -11  -7   58.88    2.85
   6 -11  -7   60.83    2.74
   6 -11  -6  199.07    5.19
   6 -11  -6  203.54    4.83
   6 -11  -5   12.19    1.60
   6 -11  -5   11.37    1.43
   6 -11  -4   54.40    2.75
   6 -11  -4   55.91    2.40
   6 -11  -3  511.75    8.96
   6 -11  -3  508.99    7.84
   6 -11  -2  119.81    3.93
   6 -11  -2  114.50    3.12
  -6 -11   2  111.38    3.59
   6 -11  -1   18.10    1.39
  -6 -11   1   20.01    1.75
   6 -11   0    3.52    0.90
  -6 -11   0    3.94    1.22
   6 -11   1   60.33    2.75
   6 -11   1   56.57    1.96
  -6 -11  -1   55.78    2.54
   6 -11   2   19.83    1.83
   6  11   2   19.09    1.68
  -6 -11  -2   20.48    1.70
   6 -11   2   20.15    1.19
   6 -11   3    0.26    1.16
   6  11   3   -0.18    1.05
  -6 -11  -3    0.41    1.15
   6 -11   3    0.41    0.66
   6 -11   4  176.13    4.66
   6 -11   4  181.37    3.21
  -6 -11  -4  178.70    4.49
  -6 -11  -5  132.36    3.84
   6 -11   5  137.32    2.57
   6 -12  -4  122.50    4.12
   6 -12  -4  121.94    3.54
   6 -12  -3  101.48    3.75
   6 -12  -3   98.52    3.09
   6 -12  -2   15.48    1.81
   6 -12  -2   17.53    1.46
  -6 -12   2   17.31    1.72
   6 -12  -1    1.88    0.93
  -6 -12   1    0.90    1.16
   6 -12   0   32.74    1.67
  -6 -12   0   34.33    2.14
  -6 -12  -1   15.26    1.64
   6 -12   1   14.37    1.17
   6 -12   1   15.88    1.72
  -6 -12  -2  147.08    4.18
   6 -12   2  142.23    3.11
   6 -12   2  139.83    4.31
  -6 -12  -3    6.50    1.34
   6 -12   3    5.69    0.89
   6 -12   3    6.63    1.48
   7   0 -13    0.06    1.13
  -7   0  13    0.24    0.76
  -7   0  12   18.09    1.25
   7   0 -12   16.42    1.12
   7   0 -12   18.21    1.63
  -7   0  12   18.29    1.79
   7   0 -11    0.29    0.67
  -7   0  11    0.37    1.02
   7   0 -11    0.28    1.02
  -7   0  11    0.33    0.73
  -7   0  10    2.53    1.06
   7   0 -10    2.53    0.73
  -7   0  10    3.57    0.84
   7   0  -9    0.34    0.65
  -7   0   9    2.91    0.75
  -7   0   9    0.64    0.94
   7   0  -9    0.32    0.88
   7   0  -8  148.33    3.20
   7   0  -8  143.02    3.48
  -7   0   8  144.53    3.68
  -7   0   8  145.97    3.30
  -7   0   7    0.64    0.93
   7   0  -7    1.36    0.82
  -7   0   7    2.07    1.03
   7   0  -7    0.25    0.93
   7   0  -6  140.36    3.15
  -7   0   6  141.85    3.32
   7   0  -6  141.25    3.28
  -7   0   6  143.45    3.24
   7   0  -5    0.04    0.60
  -7   0   5    0.15    0.64
  -7   0   5    0.61    0.62
   7   0  -5    0.57    0.63
  -7   0   4  133.30    2.90
   7   0  -4  133.35    3.08
   7   0  -4  133.31    2.95
   7   0  -3    0.37    0.59
   7   0  -3    0.15    0.53
   7   0  -2    4.88    0.80
   7   0  -2    5.92    0.69
  -7   0   2    4.74    0.76
   7   0  -1    0.11    0.57
   7   0  -1    0.82    0.48
  -7   0   1   -0.38    0.56
   7   0  -1    0.53    0.47
   7   0   0 2316.44   24.96
   7   0   0 2351.48   23.99
  -7   0   0 2365.42   24.77
   7   0   0 2319.31   23.92
   7   0   1    0.17    0.41
   7   0   1    1.03    0.43
  -7   0  -1    0.23    0.55
   7   0   2 2474.31   24.79
   7   0   2 2441.84   26.21
  -7   0  -2 2510.42   26.00
   7   0   3   -0.07    0.57
   7   0   3    0.10    0.40
   7   0   3    0.93    0.35
  -7   0  -3    0.69    0.60
   7   0   4   87.78    2.41
   7   0   4   89.22    2.34
   7   0   4   89.82    2.01
  -7   0  -4   89.12    2.26
   7   0   4   93.89    1.62
   7   0   5    0.03    0.57
   7   0   5    0.14    0.30
  -7   0  -5    0.37    0.52
   7   0   5    0.22    0.61
   7   0   5    0.25    0.47
   7   0   6   52.01    1.78
   7   0   6   51.88    1.60
  -7   0  -6   51.60    1.65
   7   0   6   51.77    1.00
   7   0   7    0.69    0.59
  -7   0  -7    0.95    0.58
   7   0   8 4052.16   40.60
   7   0   8 4025.75   40.61
  -7   0  -8 4009.67   40.27
  -7   0  -9    0.60    0.58
   7   0   9    0.59    0.62
   7   0   9    0.03    0.64
   7   0  10   12.97    0.91
   7   0  10   14.56    1.16
   7   0  11    0.33    0.52
   7   0  11    0.92    0.83
   7   1 -13   21.28    1.78
  -7  -1  13   23.05    1.29
  -7   1  13   22.98    1.43
  -7   1  12   99.13    2.73
  -7  -1  12  101.78    2.56
   7  -1 -12  104.31    3.39
  -7   1  12  101.50    3.54
  -7  -1  12  100.32    3.53
   7  -1 -12  100.77    2.59
   7   1 -12   96.97    2.43
  -7   1  11  106.54    2.86
  -7  -1  11  106.44    2.67
   7  -1 -11  107.45    3.38
  -7   1  11  112.82    3.58
  -7  -1  11  110.67    3.56
   7   1 -11  112.44    2.66
   7  -1 -11  108.32    2.71
  -7   1  10   64.67    2.20
  -7  -1  10   58.58    1.98
   7  -1 -10   57.85    2.43
  -7   1  10   59.64    2.57
  -7  -1  10   61.06    2.60
   7   1 -10   58.52    1.93
   7  -1 -10   57.09    1.95
  -7  -1   9   46.92    1.81
  -7   1   9   46.15    1.91
   7  -1  -9   43.53    1.76
   7   1  -9   45.61    1.76
   7  -1  -9   45.28    2.10
  -7   1   9   43.07    2.12
   7  -1  -9   41.88    1.93
  -7  -1   9   43.34    2.15
   7   1  -8  143.70    3.18
  -7   1   8  140.43    3.29
  -7  -1   8  142.78    3.67
   7  -1  -8  149.26    3.26
  -7   1   8  145.94    3.66
   7  -1  -8  145.98    3.46
   7   1  -8  146.92    3.61
  -7  -1   8  142.49    3.20
  -7   1   7 4069.85   41.21
   7   1  -7 4095.02   41.03
  -7   1   7 3966.72   40.82
  -7  -1   7 4054.83   41.66
   7  -1  -7 4044.86   40.95
  -7   1   7 3949.87   41.52
   7   1  -7 3990.25   41.55
   7  -1  -7 4071.28   41.18
[truncated: 150,666 more chars]
