# Supplementary material for: Structural (XRD) Characterization and an Analysis of H-Bonding Motifs in Some Tetrahydroxidohexaoxidopentaborate(1-) Salts of N-Substituted Guanidinium Cations
Source: Molecules. 2023 Apr 6;28(7):3273. doi: 10.3390/molecules28073273 (PMC10096507; doi:10.3390/molecules28073273)
Supplement: Supplementary file 1 [file molecules-28-03273-s001.zip › MAB2.cif]

data_MAB2

#2019ncs0257_1b

_audit_creation_date               2019-05-10
_audit_creation_method
;
Olex2 1.2
(compiled 2018.05.29 svn.r3508 for OlexSys, GUI svn.r5506)
;
_shelx_SHELXL_version_number       '2018/3'
_audit_contact_author_address      ?
_audit_contact_author_email        ?
_audit_contact_author_name         ''
_audit_contact_author_phone        ?
_publ_contact_author_id_orcid      ?
_publ_section_references
;
Dolomanov, O.V., Bourhis, L.J., Gildea, R.J, Howard, J.A.K. & Puschmann, H.
 (2009), J. Appl. Cryst. 42, 339-341.

Sheldrick, G.M. (2015). Acta Cryst. A71, 3-8.

Sheldrick, G.M. (2015). Acta Cryst. C71, 3-8.
;
_chemical_name_common              ?
_chemical_name_systematic          ?
_chemical_formula_moiety           'B5 H4 O10, C H7 N4'
_chemical_formula_sum              'C H11 B5 N4 O10'
_chemical_formula_weight           293.19
_chemical_melting_point            ?
_chemical_oxdiff_formula           CH11N4B5O10
_chemical_oxdiff_usercomment       MAB/TR/AmGuanB5
loop_
  _atom_type_symbol
  _atom_type_description
  _atom_type_scat_dispersion_real
  _atom_type_scat_dispersion_imag
  _atom_type_scat_source
 'C' 'C' 0.0181 0.0091 'International Tables Vol C Tables 4.2.6.8 and 6.1.1.4'
 'H' 'H' 0.0000 0.0000 'International Tables Vol C Tables 4.2.6.8 and 6.1.1.4'
 'B' 'B' 0.0090 0.0039 'International Tables Vol C Tables 4.2.6.8 and 6.1.1.4'
 'N' 'N' 0.0311 0.0180 'International Tables Vol C Tables 4.2.6.8 and 6.1.1.4'
 'O' 'O' 0.0492 0.0322 'International Tables Vol C Tables 4.2.6.8 and 6.1.1.4'

_shelx_space_group_comment
;
The symmetry employed for this shelxl refinement is uniquely defined
by the following loop, which should always be used as a source of
symmetry information in preference to the above space-group names.
They are only intended as comments.
;
_space_group_crystal_system        'triclinic'
_space_group_IT_number             2
_space_group_name_H-M_alt          'P -1'
_space_group_name_Hall             '-P 1'
loop_
  _space_group_symop_operation_xyz
 'x, y, z'
 '-x, -y, -z'

_cell_length_a                     7.4870(2)
_cell_length_b                     8.5076(2)
_cell_length_c                     9.6502(2)
_cell_angle_alpha                  93.906(2)
_cell_angle_beta                   98.470(2)
_cell_angle_gamma                  96.457(2)
_cell_volume                       601.88(3)
_cell_formula_units_Z              2
_cell_measurement_reflns_used      10327
_cell_measurement_temperature      100(2)
_cell_measurement_theta_max        69.9980
_cell_measurement_theta_min        4.5920
_shelx_estimated_absorpt_T_max     0.948
_shelx_estimated_absorpt_T_min     0.730
_exptl_absorpt_coefficient_mu      1.341
_exptl_absorpt_correction_T_max    1.00000
_exptl_absorpt_correction_T_min    0.80138
_exptl_absorpt_correction_type     multi-scan
_exptl_absorpt_process_details
;
CrysAlisPro 1.171.40.45a (Rigaku Oxford Diffraction, 2019)
Empirical absorption correction using spherical harmonics,
 implemented in SCALE3 ABSPACK scaling algorithm.
;
_exptl_absorpt_special_details     ?
_exptl_crystal_colour              colourless
_exptl_crystal_colour_primary      colourless
_exptl_crystal_density_diffrn      1.618
_exptl_crystal_density_meas        ?
_exptl_crystal_density_method      ?
_exptl_crystal_description         block
_exptl_crystal_F_000               300
_exptl_crystal_recrystallization_method 
 'The material was recrystallised from water'
_exptl_crystal_size_max            0.25
_exptl_crystal_size_mid            0.09
_exptl_crystal_size_min            0.04
_exptl_transmission_factor_max     ?
_exptl_transmission_factor_min     ?
_diffrn_reflns_av_R_equivalents    0.0404
_diffrn_reflns_av_unetI/netI       0.0185
_diffrn_reflns_Laue_measured_fraction_full  0.980
_diffrn_reflns_Laue_measured_fraction_max  0.979
_diffrn_reflns_limit_h_max         9
_diffrn_reflns_limit_h_min         -8
_diffrn_reflns_limit_k_max         10
_diffrn_reflns_limit_k_min         -10
_diffrn_reflns_limit_l_max         11
_diffrn_reflns_limit_l_min         -11
_diffrn_reflns_number              11885
_diffrn_reflns_point_group_measured_fraction_full  0.980
_diffrn_reflns_point_group_measured_fraction_max  0.979
_diffrn_reflns_theta_full          67.679
_diffrn_reflns_theta_max           68.215
_diffrn_reflns_theta_min           4.650
_diffrn_ambient_environment        N~2~
_diffrn_ambient_temperature        100(2)
_diffrn_detector                   'hybrid pixel detector'
_diffrn_detector_area_resol_mean   10
_diffrn_detector_dtime             0.000
_diffrn_detector_type              'Rigaku, HyPix 6000'
_diffrn_measured_fraction_theta_full  0.980
_diffrn_measured_fraction_theta_max  0.979
_diffrn_measurement_details
;
List of Runs (angles in degrees, time in seconds):

  # Type    Start    End  Width  t~exp~   \w     \q     \k     \f   Frames
--------------------------------------------------------------------------
  1  \w    -84.00  94.00   0.50    0.50    --    5.00   0.00-150.00  356
  2  \w   -142.00  37.00   0.50    0.50    --  -52.30  49.00-150.00  358
  3  \w   -179.00  -1.00   0.50    0.50    --  -90.00  58.00  78.55  356
  4  \w   -179.00  -1.00   0.50    0.50    --  -90.00  30.00 -60.00  356
  5  \w   -179.00  -1.00   0.50    0.50    --  -90.00  58.00-121.25  356
  6  \w   -179.00  -1.00   0.50    0.50    --  -90.00  39.00-180.00  356
  7  \w   -179.00  -1.00   0.50    0.50    --  -90.00  58.00  32.12  356
  8  \w   -179.00  -1.00   0.50    0.50    --  -90.00  59.00 157.84  356
  9  \w   -179.00  -1.00   0.50    0.50    --  -90.00  20.00 120.00  356
 10  \w   -179.00  -1.00   0.50    0.50    --  -90.00  59.00 -63.81  356
 11  \w   -179.00  -1.00   0.50    0.50    --  -90.00  20.00 120.00  356
 12  \w   -179.00  -1.00   0.50    0.50    --  -90.00  49.00 120.00  356
 13  \w   -179.00  -1.00   0.50    0.50    --  -90.00  57.00 -42.40  356
 14  \w   -142.00  37.00   0.50    0.50    --  -52.30  59.00  90.00  358
 15  \w   -142.00  37.00   0.50    0.50    --  -52.30  59.00   0.00  358
;
_diffrn_measurement_device         'four-circle diffractometer'
_diffrn_measurement_device_details  'Rigaku, AFC11 quarter \c goniometer'
_diffrn_measurement_device_type   
 'Rigaku 007HF equipped with Varimax confocal mirrors and an AFC11 goniometer and HyPix 6000 detector'
_diffrn_measurement_method         'profile data from \w-scans'
_diffrn_measurement_specimen_support  'MiTeGen loops'
_diffrn_orient_matrix_type        
 'CrysAlisPro convention (1999,Acta A55,543-557)'
_diffrn_orient_matrix_UB_11        -0.0145828000
_diffrn_orient_matrix_UB_12        -0.1190699000
_diffrn_orient_matrix_UB_13        -0.1299896000
_diffrn_orient_matrix_UB_21        0.1212140000
_diffrn_orient_matrix_UB_22        0.1209234000
_diffrn_orient_matrix_UB_23        -0.0682024000
_diffrn_orient_matrix_UB_31        0.1704391000
_diffrn_orient_matrix_UB_32        -0.0682556000
_diffrn_orient_matrix_UB_33        0.0685294000
_diffrn_radiation_collimation      'Varimax focusing mirrors'
_diffrn_radiation_monochromator    mirror
_diffrn_radiation_probe            x-ray
_diffrn_radiation_type             CuK\a
_diffrn_radiation_wavelength       1.54178
_diffrn_radiation_wavelength_determination  fundamental
_diffrn_source                     'Rotating anode'
_diffrn_source_current             30.0
_diffrn_source_power               1.2
_diffrn_source_target              Cu
_diffrn_source_type                'Rigaku 007 HF'
_diffrn_source_voltage             40.0
_reflns_Friedel_coverage           0.000
_reflns_Friedel_fraction_full      .
_reflns_Friedel_fraction_max       .
_reflns_number_gt                  2060
_reflns_number_total               2142
_reflns_odcompleteness_completeness  97.90
_reflns_odcompleteness_iscentric   1
_reflns_odcompleteness_theta       68.13
_reflns_special_details
;
 Reflections were merged by SHELXL according to the crystal
 class for the calculation of statistics and refinement.
 
 _reflns_Friedel_fraction is defined as the number of unique
 Friedel pairs measured divided by the number that would be
 possible theoretically, ignoring centric projections and
 systematic absences.
;
_reflns_threshold_expression       'I > 2\s(I)'
_computing_cell_refinement         'CrysAlisPro 1.171.40.45a (Rigaku OD, 2019)'
_computing_data_collection         'CrysAlisPro 1.171.40.45a (Rigaku OD, 2019)'
_computing_data_reduction          'CrysAlisPro 1.171.40.45a (Rigaku OD, 2019)'
_computing_molecular_graphics      'Olex2 (Dolomanov et al., 2009)'
_computing_publication_material    'Olex2 (Dolomanov et al., 2009)'
_computing_structure_refinement    'ShelXL (Sheldrick, 2015)'
_computing_structure_solution      'ShelXT (Sheldrick, 2015)'
_refine_diff_density_max           0.201
_refine_diff_density_min           -0.236
_refine_diff_density_rms           0.041
_refine_ls_extinction_coef         .
_refine_ls_extinction_method       none
_refine_ls_goodness_of_fit_ref     1.040
_refine_ls_hydrogen_treatment      refall
_refine_ls_matrix_type             full
_refine_ls_number_parameters       225
_refine_ls_number_reflns           2142
_refine_ls_number_restraints       0
_refine_ls_R_factor_all            0.0302
_refine_ls_R_factor_gt             0.0294
_refine_ls_restrained_S_all        1.040
_refine_ls_shift/su_max            0.001
_refine_ls_shift/su_mean           0.000
_refine_ls_structure_factor_coef   Fsqd
_refine_ls_weighting_details      
 'w=1/[\s^2^(Fo^2^)+(0.0536P)^2^+0.1484P] where P=(Fo^2^+2Fc^2^)/3'
_refine_ls_weighting_scheme        calc
_refine_ls_wR_factor_gt            0.0818
_refine_ls_wR_factor_ref           0.0827
_refine_special_details            ?
_olex2_refinement_description
;
;
_atom_sites_solution_hydrogens     difmap
_atom_sites_solution_primary       dual
_atom_sites_solution_secondary     ?
loop_
  _atom_site_label
  _atom_site_type_symbol
  _atom_site_fract_x
  _atom_site_fract_y
  _atom_site_fract_z
  _atom_site_U_iso_or_equiv
  _atom_site_adp_type
  _atom_site_occupancy
  _atom_site_site_symmetry_order
  _atom_site_calc_flag
  _atom_site_refinement_flags_posn
  _atom_site_refinement_flags_adp
  _atom_site_refinement_flags_occupancy
  _atom_site_disorder_assembly
  _atom_site_disorder_group
 O1 O 0.39118(10) 0.56582(9) 0.85181(8) 0.0193(2) Uani 1 1 d . . . . .
 O2 O 0.40336(11) 0.39183(9) 0.64923(8) 0.0205(2) Uani 1 1 d . . . . .
 O3 O 0.15065(10) 0.53846(9) 0.65123(8) 0.0184(2) Uani 1 1 d . . . . .
 O4 O 0.26646(10) 0.79546(9) 0.76170(8) 0.0186(2) Uani 1 1 d . . . . .
 O5 O 0.09714(11) 0.88397(9) 0.93609(8) 0.0203(2) Uani 1 1 d . . . . .
 O6 O 0.09227(10) 0.60607(9) 0.88369(8) 0.0183(2) Uani 1 1 d . . . . .
 O7 O 0.59004(11) 0.36589(10) 0.86058(9) 0.0242(2) Uani 1 1 d . . . . .
 H7 H 0.607(3) 0.399(2) 0.948(2) 0.055(5) Uiso 1 1 d . . . . .
 O8 O 0.18352(12) 0.37599(10) 0.44821(8) 0.0232(2) Uani 1 1 d . . . . .
 H8 H 0.088(3) 0.407(2) 0.415(2) 0.048(5) Uiso 1 1 d . . . . .
 O9 O 0.21796(12) 1.06245(10) 0.78484(9) 0.0238(2) Uani 1 1 d . . . . .
 H9 H 0.167(2) 1.128(2) 0.8315(17) 0.036(4) Uiso 1 1 d . . . . .
 O10 O -0.05827(11) 0.70722(10) 1.06550(9) 0.0239(2) Uani 1 1 d . . . . .
 H10 H -0.078(3) 0.603(3) 1.081(2) 0.053(5) Uiso 1 1 d . . . . .
 B1 B 0.22551(17) 0.62743(14) 0.78689(13) 0.0172(3) Uani 1 1 d . . . . .
 B2 B 0.46210(17) 0.44464(15) 0.78967(13) 0.0193(3) Uani 1 1 d . . . . .
 B3 B 0.24297(17) 0.43765(14) 0.58222(13) 0.0182(3) Uani 1 1 d . . . . .
 B4 B 0.19317(17) 0.91337(15) 0.82721(13) 0.0184(3) Uani 1 1 d . . . . .
 B5 B 0.04372(17) 0.72893(15) 0.96117(13) 0.0189(3) Uani 1 1 d . . . . .
 H3 H 0.377(2) -0.134(2) 0.2327(17) 0.031(4) Uiso 1 1 d . . . . .
 N1 N 0.22398(14) 0.04283(12) 0.46621(11) 0.0230(2) Uani 1 1 d . . . . .
 H1A H 0.219(2) 0.133(2) 0.4253(17) 0.032(4) Uiso 1 1 d . . . . .
 H1B H 0.212(2) 0.0402(19) 0.5565(18) 0.033(4) Uiso 1 1 d . . . . .
 N2 N 0.33083(15) -0.20118(12) 0.46731(12) 0.0254(2) Uani 1 1 d . . . . .
 H2A H 0.399(2) -0.2612(19) 0.4318(17) 0.032(4) Uiso 1 1 d . . . . .
 H2B H 0.309(2) -0.2044(19) 0.5531(19) 0.035(4) Uiso 1 1 d . . . . .
 N3 N 0.34484(14) -0.05537(12) 0.27720(10) 0.0216(2) Uani 1 1 d . . . . .
 N4 N 0.31104(15) 0.08361(12) 0.21153(10) 0.0222(2) Uani 1 1 d . . . . .
 H4A H 0.417(2) 0.1322(18) 0.1917(16) 0.029(4) Uiso 1 1 d . . . . .
 H4B H 0.235(2) 0.0567(17) 0.1319(17) 0.026(4) Uiso 1 1 d . . . . .
 C1 C 0.29979(15) -0.07037(13) 0.40438(12) 0.0196(2) Uani 1 1 d . . . . .

loop_
  _atom_site_aniso_label
  _atom_site_aniso_U_11
  _atom_site_aniso_U_22
  _atom_site_aniso_U_33
  _atom_site_aniso_U_23
  _atom_site_aniso_U_13
  _atom_site_aniso_U_12
 O1 0.0197(4) 0.0216(4) 0.0162(4) -0.0024(3) -0.0004(3) 0.0069(3)
 O2 0.0217(4) 0.0239(4) 0.0160(4) -0.0029(3) 0.0003(3) 0.0100(3)
 O3 0.0190(4) 0.0200(4) 0.0157(4) -0.0022(3) -0.0002(3) 0.0060(3)
 O4 0.0209(4) 0.0186(4) 0.0169(4) -0.0004(3) 0.0038(3) 0.0048(3)
 O5 0.0243(4) 0.0176(4) 0.0202(4) -0.0011(3) 0.0068(3) 0.0051(3)
 O6 0.0199(4) 0.0177(4) 0.0175(4) -0.0006(3) 0.0032(3) 0.0046(3)
 O7 0.0264(5) 0.0283(5) 0.0173(4) -0.0050(3) -0.0033(3) 0.0134(3)
 O8 0.0255(5) 0.0260(4) 0.0174(4) -0.0047(3) -0.0033(3) 0.0126(3)
 O9 0.0319(5) 0.0186(4) 0.0238(4) 0.0004(3) 0.0118(4) 0.0066(3)
 O10 0.0304(5) 0.0182(4) 0.0260(4) 0.0010(3) 0.0124(4) 0.0060(3)
 B1 0.0189(6) 0.0179(6) 0.0145(6) -0.0010(5) 0.0007(5) 0.0051(5)
 B2 0.0186(6) 0.0219(6) 0.0166(6) -0.0019(5) 0.0014(5) 0.0038(5)
 B3 0.0203(6) 0.0176(6) 0.0165(6) 0.0005(5) 0.0015(5) 0.0043(5)
 B4 0.0175(6) 0.0199(6) 0.0169(6) -0.0012(5) 0.0000(4) 0.0032(5)
 B5 0.0179(6) 0.0204(6) 0.0182(6) 0.0005(5) 0.0003(5) 0.0057(5)
 N1 0.0281(6) 0.0229(5) 0.0197(5) 0.0005(4) 0.0070(4) 0.0081(4)
 N2 0.0346(6) 0.0240(5) 0.0215(5) 0.0025(4) 0.0111(4) 0.0114(4)
 N3 0.0267(5) 0.0212(5) 0.0181(5) -0.0004(4) 0.0048(4) 0.0080(4)
 N4 0.0247(5) 0.0224(5) 0.0193(5) 0.0020(4) 0.0013(4) 0.0048(4)
 C1 0.0167(5) 0.0214(6) 0.0195(5) -0.0017(4) 0.0014(4) 0.0021(4)

_geom_special_details
;
 All esds (except the esd in the dihedral angle between two l.s. planes)
 are estimated using the full covariance matrix.  The cell esds are taken
 into account individually in the estimation of esds in distances, angles
 and torsion angles; correlations between esds in cell parameters are only
 used when they are defined by crystal symmetry.  An approximate (isotropic)
 treatment of cell esds is used for estimating esds involving l.s. planes.
;
loop_
  _geom_bond_atom_site_label_1
  _geom_bond_atom_site_label_2
  _geom_bond_distance
  _geom_bond_site_symmetry_2
  _geom_bond_publ_flag
 O1 B1 1.4723(14) . ?
 O1 B2 1.3554(15) . ?
 O2 B2 1.3889(14) . ?
 O2 B3 1.3868(15) . ?
 O3 B1 1.4678(14) . ?
 O3 B3 1.3594(15) . ?
 O4 B1 1.4722(14) . ?
 O4 B4 1.3589(15) . ?
 O5 B4 1.3790(15) . ?
 O5 B5 1.3827(15) . ?
 O6 B1 1.4689(14) . ?
 O6 B5 1.3574(15) . ?
 O7 H7 0.85(2) . ?
 O7 B2 1.3596(16) . ?
 O8 H8 0.82(2) . ?
 O8 B3 1.3532(15) . ?
 O9 H9 0.851(18) . ?
 O9 B4 1.3602(15) . ?
 O10 H10 0.91(2) . ?
 O10 B5 1.3605(15) . ?
 N1 H1A 0.887(17) . ?
 N1 H1B 0.890(17) . ?
 N1 C1 1.3229(15) . ?
 N2 H2A 0.851(17) . ?
 N2 H2B 0.868(18) . ?
 N2 C1 1.3304(16) . ?
 N3 H3 0.851(17) . ?
 N3 N4 1.4092(14) . ?
 N3 C1 1.3304(15) . ?
 N4 H4A 0.906(17) . ?
 N4 H4B 0.887(16) . ?

loop_
  _geom_angle_atom_site_label_1
  _geom_angle_atom_site_label_2
  _geom_angle_atom_site_label_3
  _geom_angle
  _geom_angle_site_symmetry_1
  _geom_angle_site_symmetry_3
  _geom_angle_publ_flag
 B2 O1 B1 122.82(9) . . ?
 B3 O2 B2 118.62(9) . . ?
 B3 O3 B1 123.66(9) . . ?
 B4 O4 B1 122.43(9) . . ?
 B4 O5 B5 119.54(9) . . ?
 B5 O6 B1 122.92(9) . . ?
 B2 O7 H7 109.5(13) . . ?
 B3 O8 H8 112.1(13) . . ?
 B4 O9 H9 112.2(11) . . ?
 B5 O10 H10 111.3(12) . . ?
 O3 B1 O1 110.87(9) . . ?
 O3 B1 O4 107.94(9) . . ?
 O3 B1 O6 109.11(9) . . ?
 O4 B1 O1 110.42(9) . . ?
 O6 B1 O1 106.87(9) . . ?
 O6 B1 O4 111.65(9) . . ?
 O1 B2 O2 121.08(10) . . ?
 O1 B2 O7 122.56(10) . . ?
 O7 B2 O2 116.34(10) . . ?
 O3 B3 O2 120.33(10) . . ?
 O8 B3 O2 117.11(10) . . ?
 O8 B3 O3 122.56(11) . . ?
 O4 B4 O5 120.97(10) . . ?
 O4 B4 O9 118.87(10) . . ?
 O9 B4 O5 120.16(10) . . ?
 O6 B5 O5 120.49(10) . . ?
 O6 B5 O10 122.61(11) . . ?
 O10 B5 O5 116.90(10) . . ?
 H1A N1 H1B 120.2(15) . . ?
 C1 N1 H1A 117.5(10) . . ?
 C1 N1 H1B 119.5(10) . . ?
 H2A N2 H2B 123.0(15) . . ?
 C1 N2 H2A 117.1(10) . . ?
 C1 N2 H2B 117.1(11) . . ?
 N4 N3 H3 121.3(11) . . ?
 C1 N3 H3 119.6(11) . . ?
 C1 N3 N4 118.42(10) . . ?
 N3 N4 H4A 109.0(10) . . ?
 N3 N4 H4B 108.7(9) . . ?
 H4A N4 H4B 109.0(13) . . ?
 N1 C1 N2 120.82(11) . . ?
 N1 C1 N3 120.23(11) . . ?
 N3 C1 N2 118.95(10) . . ?

loop_
  _geom_hbond_atom_site_label_D
  _geom_hbond_atom_site_label_H
  _geom_hbond_atom_site_label_A
  _geom_hbond_distance_DH
  _geom_hbond_distance_HA
  _geom_hbond_distance_DA
  _geom_hbond_angle_DHA
  _geom_hbond_site_symmetry_A
  _geom_hbond_publ_flag
 O7 H7 O1 0.85(2) 1.94(2) 2.7763(11) 167.7(19) 2_667 yes
 O8 H8 O3 0.82(2) 1.92(2) 2.7400(12) 173.6(18) 2_566 yes
 O9 H9 O10 0.851(18) 1.979(18) 2.8294(12) 175.9(16) 2_577 yes
 O10 H10 O6 0.91(2) 1.83(2) 2.7334(11) 174.2(18) 2_567 yes
 N3 H3 O7 0.851(17) 2.164(18) 2.9978(13) 166.6(14) 2_656 yes
 N1 H1A O8 0.887(17) 2.116(17) 2.8984(14) 146.7(14) . yes
 N1 H1B O9 0.890(17) 2.192(18) 3.0752(13) 171.4(14) 1_545 yes
 N2 H2A O2 0.851(17) 2.152(18) 2.9988(13) 173.4(15) 2_656 yes
 N2 H2B O4 0.868(18) 2.084(18) 2.9522(13) 177.6(16) 1_545 yes
 N4 H4A O4 0.906(17) 2.348(17) 3.1816(13) 153.0(13) 2_666 yes
 N4 H4B O5 0.887(16) 2.345(16) 3.1676(13) 154.3(13) 1_544 yes

loop_
  _geom_torsion_atom_site_label_1
  _geom_torsion_atom_site_label_2
  _geom_torsion_atom_site_label_3
  _geom_torsion_atom_site_label_4
  _geom_torsion
  _geom_torsion_site_symmetry_1
  _geom_torsion_site_symmetry_2
  _geom_torsion_site_symmetry_3
  _geom_torsion_site_symmetry_4
  _geom_torsion_publ_flag
 B1 O1 B2 O2 12.76(17) . . . . ?
 B1 O1 B2 O7 -165.67(11) . . . . ?
 B1 O3 B3 O2 11.49(16) . . . . ?
 B1 O3 B3 O8 -169.51(10) . . . . ?
 B1 O4 B4 O5 9.53(16) . . . . ?
 B1 O4 B4 O9 -171.32(10) . . . . ?
 B1 O6 B5 O5 10.16(16) . . . . ?
 B1 O6 B5 O10 -169.95(10) . . . . ?
 B2 O1 B1 O3 1.06(14) . . . . ?
 B2 O1 B1 O4 -118.52(11) . . . . ?
 B2 O1 B1 O6 119.86(10) . . . . ?
 B2 O2 B3 O3 3.18(16) . . . . ?
 B2 O2 B3 O8 -175.87(10) . . . . ?
 B3 O2 B2 O1 -15.14(16) . . . . ?
 B3 O2 B2 O7 163.38(10) . . . . ?
 B3 O3 B1 O1 -13.17(14) . . . . ?
 B3 O3 B1 O4 107.89(11) . . . . ?
 B3 O3 B1 O6 -130.61(10) . . . . ?
 B4 O4 B1 O1 -115.99(11) . . . . ?
 B4 O4 B1 O3 122.68(10) . . . . ?
 B4 O4 B1 O6 2.76(14) . . . . ?
 B4 O5 B5 O6 3.04(16) . . . . ?
 B4 O5 B5 O10 -176.86(9) . . . . ?
 B5 O5 B4 O4 -12.83(16) . . . . ?
 B5 O5 B4 O9 168.03(10) . . . . ?
 B5 O6 B1 O1 108.27(11) . . . . ?
 B5 O6 B1 O3 -131.80(10) . . . . ?
 B5 O6 B1 O4 -12.58(14) . . . . ?
 N4 N3 C1 N1 0.47(16) . . . . ?
 N4 N3 C1 N2 179.91(10) . . . . ?

_shelx_res_file
;
TITL 2019ncs0257_1b_a.res in P-1
    2019ncs0257_1b.res
    created by SHELXL-2018/3 at 17:39:41 on 10-May-2019
REM Old TITL 2019NCS0257_1b in P-1
REM SHELXT solution in P-1: R1 0.114, Rweak 0.004, Alpha 0.029
REM <I/s> 0.000 for 0 systematic absences, Orientation as input
REM Formula found by SHELXT: C5 B N3 O11
CELL 1.54178 7.487 8.5076 9.6502 93.906 98.47 96.457
ZERR 2 0.0002 0.0002 0.0002 0.002 0.002 0.002
LATT 1
SFAC C H B N O
UNIT 2 22 10 8 20
EQIV $1 1-X,1-Y,2-Z
EQIV $2 -X,1-Y,2-Z
EQIV $3 -X,1-Y,1-Z
EQIV $4 -X,2-Y,2-Z
EQIV $5 +X,-1+Y,+Z
EQIV $6 1-X,-Y,1-Z
EQIV $7 +X,-1+Y,-1+Z
EQIV $8 1-X,1-Y,1-Z

L.S. 9
PLAN  10
SIZE 0.04 0.09 0.25
TEMP -173(2)
HTAB O7 O1_$1
HTAB O10 O6_$2
HTAB O8 O3_$3
HTAB O9 O10_$4
HTAB N3 O7_$6
HTAB N1 O8
HTAB N1 O9_$5
HTAB N4 O4_$8
HTAB N4 O5_$7
HTAB N2 O4_$5
HTAB N2 O2_$6
BOND $H
CONF
MORE -1
fmap 2 53
acta
REM <olex2.extras>
REM <HklSrc "%.\\2019NCS0257_1b.hkl">
REM </olex2.extras>

WGHT    0.053600    0.148400
FVAR       1.72398
O1    5    0.391176    0.565817    0.851810    11.00000    0.01966    0.02162 =
         0.01617   -0.00240   -0.00043    0.00693
O2    5    0.403363    0.391827    0.649229    11.00000    0.02172    0.02393 =
         0.01600   -0.00288    0.00030    0.01002
O3    5    0.150650    0.538463    0.651227    11.00000    0.01898    0.02000 =
         0.01574   -0.00215   -0.00023    0.00599
O4    5    0.266461    0.795458    0.761704    11.00000    0.02090    0.01865 =
         0.01689   -0.00035    0.00378    0.00477
O5    5    0.097140    0.883974    0.936092    11.00000    0.02432    0.01764 =
         0.02017   -0.00109    0.00684    0.00514
O6    5    0.092272    0.606074    0.883691    11.00000    0.01991    0.01769 =
         0.01752   -0.00061    0.00322    0.00462
O7    5    0.590039    0.365887    0.860577    11.00000    0.02637    0.02831 =
         0.01734   -0.00499   -0.00330    0.01342
H7    2    0.607467    0.398587    0.947586    11.00000    0.05494
O8    5    0.183518    0.375994    0.448213    11.00000    0.02548    0.02602 =
         0.01736   -0.00470   -0.00330    0.01256
H8    2    0.087651    0.406980    0.415261    11.00000    0.04767
O9    5    0.217956    1.062450    0.784837    11.00000    0.03188    0.01862 =
         0.02382    0.00035    0.01183    0.00658
H9    2    0.166814    1.128021    0.831470    11.00000    0.03594
O10   5   -0.058274    0.707217    1.065498    11.00000    0.03043    0.01823 =
         0.02597    0.00100    0.01239    0.00602
H10   2   -0.077829    0.603202    1.081071    11.00000    0.05260
B1    3    0.225515    0.627429    0.786888    11.00000    0.01886    0.01792 =
         0.01446   -0.00103    0.00070    0.00512
B2    3    0.462096    0.444635    0.789665    11.00000    0.01863    0.02194 =
         0.01665   -0.00193    0.00140    0.00382
B3    3    0.242967    0.437652    0.582215    11.00000    0.02035    0.01758 =
         0.01652    0.00049    0.00148    0.00432
B4    3    0.193170    0.913375    0.827206    11.00000    0.01748    0.01986 =
         0.01688   -0.00124   -0.00005    0.00316
B5    3    0.043720    0.728926    0.961168    11.00000    0.01787    0.02038 =
         0.01822    0.00053    0.00029    0.00574
H3    2    0.377444   -0.134334    0.232694    11.00000    0.03076
N1    4    0.223982    0.042826    0.466213    11.00000    0.02812    0.02294 =
         0.01972    0.00046    0.00698    0.00805
H1A   2    0.218838    0.132761    0.425319    11.00000    0.03246
H1B   2    0.212445    0.040168    0.556536    11.00000    0.03321
N2    4    0.330835   -0.201183    0.467314    11.00000    0.03455    0.02402 =
         0.02154    0.00253    0.01105    0.01140
H2A   2    0.398924   -0.261152    0.431770    11.00000    0.03208
H2B   2    0.309325   -0.204439    0.553137    11.00000    0.03487
N3    4    0.344835   -0.055366    0.277201    11.00000    0.02673    0.02116 =
         0.01805   -0.00036    0.00484    0.00800
N4    4    0.311037    0.083611    0.211529    11.00000    0.02468    0.02236 =
         0.01935    0.00203    0.00133    0.00479
H4A   2    0.417168    0.132178    0.191675    11.00000    0.02915
H4B   2    0.234791    0.056722    0.131864    11.00000    0.02563
C1    1    0.299791   -0.070371    0.404384    11.00000    0.01675    0.02138 =
         0.01955   -0.00173    0.00140    0.00205
HKLF 4


REM  2019ncs0257_1b_a.res in P-1
REM wR2 = 0.0827, GooF = S = 1.040, Restrained GooF = 1.040 for all data
REM R1 = 0.0294 for 2060 Fo > 4sig(Fo) and 0.0302 for all 2142 data
REM 225 parameters refined using 0 restraints

END

WGHT      0.0536      0.1474

REM Highest difference peak  0.201,  deepest hole -0.236,  1-sigma level  0.041
Q1    1   0.1034  0.4427  0.6606  11.00000  0.05    0.20
Q2    1   0.3875 -0.1063  0.4556  11.00000  0.05    0.17
Q3    1   0.2347 -0.0982  0.3045  11.00000  0.05    0.17
Q4    1   0.2253  0.7184  0.7809  11.00000  0.05    0.17
Q5    1   0.3376  0.4790  0.8706  11.00000  0.05    0.16
Q6    1   0.4432 -0.0237  0.3765  11.00000  0.05    0.15
Q7    1   0.5412  0.2532  0.8319  11.00000  0.05    0.14
Q8    1   0.6881  0.4398  0.8254  11.00000  0.05    0.14
Q9    1   0.3688  0.8441  0.7233  11.00000  0.05    0.14
Q10   1   0.1439  0.6211  0.8382  11.00000  0.05    0.14
;
_shelx_res_checksum                84357
_shelx_hkl_file
;
   0   0   1   57.27    1.48
   0   0  -1   56.11    1.52
   0   0   1   53.99    1.44
   0   0  -2  373.72    6.33
   0   0  -2  391.02    7.14
   0   0  -3 5643.46   90.26
   0   0  -4  157.94    4.57
   0   0   4  149.82    4.53
   0   0  -4  148.14    5.06
   0   0   4  150.02    4.43
   0   0   5  249.51    7.10
   0   0   5  267.74    7.54
   0   0   5  251.44    6.84
   0   0  -5  220.98    6.77
   0   0  -5  240.82    7.13
   0   0   5  222.75    6.63
   0   0   5  233.31    6.34
   0   0   5  232.05    6.43
   0   0   6  212.92    6.50
   0   0  -6  210.66    7.17
   0   0  -6  196.69    6.90
   0   0   6  238.91    7.89
   0   0   6  225.00    6.74
   0   0   6  207.11    6.47
   0   0   6  222.01    7.07
   0   0   6  239.04    7.58
   0   0  -7  525.71   13.41
   0   0   7  587.86   14.56
   0   0   7  496.98   12.27
   0   0   7  543.83   13.99
   0   0   7  468.40   12.06
   0   0   7  558.95   13.65
   0   0   7  537.86   12.83
   0   0  -8  103.33    5.40
   0   0   8  107.08    5.59
   0   0   8  107.47    5.82
   0   0   8   94.20    5.35
   0   0   8  103.04    4.88
   0   0   8   93.55    4.39
   0   0   8   85.19    4.22
   0   0   9  274.98    9.74
   0   0   9  272.13    9.62
   0   0  -9  231.03    8.97
   0   0   9  315.46    9.82
   0   0   9  270.47    8.26
   0   0  -9  268.42    9.19
   0   0  10  549.99   14.44
   0   0 -10  533.45   13.70
   0   0 -11   68.93    3.14
   0   0  11   71.45    3.53
   0  -1  11   18.00    1.96
   0   1 -11   18.84    1.85
   0  -1  11   22.81    2.04
   0   1 -10  666.58   16.16
   0  -1  10  643.34   16.66
   0  -1   9  195.91    6.80
   0  -1   9  222.30    7.47
   0  -1   9  246.05    8.67
   0  -1   9  227.49    9.02
   0   1  -9  209.94    8.51
   0   1  -9  230.65    8.53
   0  -1   9  200.75    7.85
   0  -1   8  346.89   11.42
   0  -1   8  354.23   10.69
   0  -1   8  314.29   10.21
   0   1  -8  322.81   10.55
   0  -1   8  314.00    9.40
   0  -1   8  328.13    9.68
   0  -1   7  117.03    5.13
   0  -1   7  129.55    5.69
   0   1  -7  128.11    6.04
   0  -1   7  127.04    5.31
   0  -1   7  134.39    5.91
   0  -1   7  143.77    6.70
   0  -1   6  595.65   13.15
   0   1  -6  463.45   12.23
   0  -1   6  518.55   12.44
   0  -1   6  509.67   12.29
   0  -1   6  554.36   12.72
   0  -1   6  594.33   14.09
   0  -1   5 1100.01   20.17
   0   1  -5  919.02   17.96
   0  -1   5 1063.70   20.00
   0  -1   5 1144.70   20.30
   0  -1   5 1060.43   19.97
   0   1  -5 1022.06   20.03
   0  -1   5 1207.58   21.66
   0  -1   5 1097.75   20.16
   0  -1   4 5806.92   92.44
   0   1  -4 6058.84   92.56
   0  -1   3 1354.04   22.00
   0  -1   3 1311.86   21.95
   0  -1   3 1195.11   21.44
   0   1  -3 1212.73   21.39
   0   1  -3 1334.23   21.96
   0   1  -2  247.12    5.13
   0  -1   2  244.11    5.04
   0  -1   2  242.42    4.80
   0  -1   2  256.97    5.22
   0  -1   1   93.40    2.17
   0  -1   1   82.04    1.72
   0   1  -1   84.31    2.53
   0   1  -1   91.80    2.23
   0   1   0  298.12    5.22
   0  -1   0  360.83    5.60
   0  -1   0  301.18    5.56
   0  -1   0  354.46    5.82
   0   1   0  332.88    5.76
   0   1   1 1014.77   17.32
   0   1   1 1172.12   17.79
   0  -1  -1 1014.52   16.97
   0  -1  -1 1120.05   17.48
   0  -1  -2 2170.07   35.54
   0   1   2 2234.94   35.46
   0  -1  -2 2109.91   35.31
   0  -1  -3    1.89    0.91
   0  -1  -3    0.44    0.19
   0   1   3    0.72    0.69
   0  -1  -3    2.00    0.72
   0   1   4 9869.55  155.15
   0   1   4 9805.98  155.22
   0   1   5   18.98    1.53
   0  -1  -5   24.36    2.38
   0   1   5   21.13    1.79
   0  -1  -5   19.15    1.87
   0   1   5   19.77    1.62
   0   1   5   17.95    1.75
   0  -1  -5   21.85    1.86
   0   1   5   19.25    1.83
   0   1   5   23.06    2.13
   0   1   5   20.09    1.95
   0  -1  -5   21.01    1.82
   0   1   6 1066.46   21.71
   0   1   6 1035.97   21.65
   0  -1  -6 1226.91   23.01
   0   1   6 1294.01   24.66
   0   1   6 1187.98   23.23
   0   1   6 1222.66   23.97
   0   1   6 1262.83   23.66
   0  -1  -6 1195.30   24.07
   0  -1  -6 1225.70   22.96
   0   1   6 1269.08   22.93
   0  -1  -6 1220.60   23.30
   0   1   7  138.51    5.96
   0   1   7  124.84    5.93
   0  -1  -7  130.08    5.68
   0   1   7  130.39    5.55
   0   1   7  137.30    5.51
   0   1   8   88.50    4.61
   0   1   8   92.22    4.57
   0   1   8   82.69    4.97
   0  -1  -8   85.80    4.84
   0   1   8   92.35    5.20
   0   1   9  488.16   13.50
   0   1   9  493.01   13.97
   0  -1  -9  480.64   12.89
   0   1   9  521.50   12.38
   0   1   9  470.31   12.17
   0   1  10   35.18    2.79
   0  -1 -10   33.09    2.53
   0   1  11   16.95    1.55
   0   1  11   22.76    1.90
   0  -2  11  123.50    4.68
   0   2 -11  114.48    4.59
   0   2 -10    1.25    1.39
   0  -2  10    0.71    1.29
   0  -2  10    0.32    1.14
   0   2  -9   13.65    2.47
   0  -2   9   13.01    1.94
   0  -2   9    8.27    1.65
   0  -2   9   14.71    2.33
   0   2  -9   11.67    2.36
   0  -2   9   12.63    1.89
   0  -2   8    0.50    1.06
   0  -2   8    0.47    0.89
   0  -2   8    1.19    1.34
   0   2  -8    1.77    1.76
   0  -2   8    2.26    1.25
   0   2  -8    1.97    1.65
   0  -2   7  153.12    6.09
   0  -2   7  143.32    6.10
   0  -2   7  152.02    6.43
   0   2  -7  159.65    7.27
   0  -2   7  144.74    5.94
   0  -2   6 2518.11   44.28
   0   2  -6 2176.76   41.90
   0  -2   6 2956.53   44.54
   0  -2   6 2747.21   44.91
   0  -2   6 2730.64   44.98
   0   2  -6 2468.97   46.49
   0   2  -6 2407.17   43.17
   0  -2   6 2678.67   44.98
   0   2  -5  178.69    5.44
   0  -2   5  207.00    6.58
   0  -2   5  196.48    6.18
   0  -2   5  244.01    7.32
   0   2  -5  193.54    6.26
   0  -2   5  224.02    6.73
   0  -2   5  247.27    6.32
   0  -2   5  221.71    6.63
   0  -2   4    1.41    0.91
   0  -2   4    1.11    0.70
   0  -2   4    1.17    0.90
   0   2  -4    0.11    0.69
   0   2  -4    0.33    0.81
   0  -2   4    0.68    0.83
   0  -2   4    0.36    0.62
   0  -2   4    0.71    0.94
   0  -2   4    0.32    0.88
   0  -2   3   97.34    2.81
   0   2  -3   95.66    3.57
   0   2  -3  107.16    3.49
   0  -2   3   98.52    3.23
   0  -2   2  425.17    8.12
   0  -2   2  402.87    7.07
   0   2  -2  389.05    8.74
   0   2  -2  399.93    8.31
   0  -2   2  398.62    7.98
   0   2  -1  688.44   14.14
   0   2  -1  689.77   13.62
   0  -2  -1 1864.50   30.55
   0   2   1 1936.47   30.66
   0  -2  -3  345.47    7.66
   0   2   3  349.94    8.12
   0   2   3  343.73    7.61
   0  -2  -3  335.50    7.97
   0  -2  -4 3732.84   56.77
   0   2   4 3299.64   56.02
   0   2   4 3398.64   55.79
   0  -2  -4 3127.57   56.46
   0   2   4 3727.87   57.10
   0   2   4 3499.00   56.38
   0  -2  -4 3135.73   56.49
   0  -2  -4 3608.35   57.37
   0  -2  -4 3267.71   55.93
   0  -2  -5  392.95   10.34
   0   2   5  369.13    9.30
   0   2   5  373.54    9.43
   0  -2  -5  369.11    9.75
   0  -2  -5  397.75    9.99
   0   2   5  368.96    9.68
   0   2   5  396.11   10.11
   0  -2  -5  359.34    9.18
   0   2   5  333.02    9.03
   0   2   5  370.66    9.12
   0  -2  -5  391.06    9.91
   0   2   6  246.88    8.17
   0   2   6  244.89    7.90
   0  -2  -6  246.56    7.90
   0   2   6  246.03    7.37
   0  -2  -6  241.05    7.97
   0   2   6  218.97    7.04
   0  -2  -6  244.75    7.89
   0   2   6  216.86    7.30
   0   2   6  247.86    7.77
   0  -2  -6  237.79    7.41
   0   2   7    7.06    1.67
   0   2   7    6.34    1.34
   0  -2  -7    6.09    1.56
   0   2   7    6.96    1.55
   0  -2  -7    7.65    1.58
   0  -2  -7    7.34    1.57
   0   2   7    6.36    1.73
   0   2   7    8.49    1.79
   0  -2  -7    4.97    1.61
   0   2   7    6.00    1.55
   0   2   8    5.01    1.51
   0  -2  -8    5.06    1.48
   0   2   8    6.60    1.74
   0   2   8    5.28    1.63
   0   2   8    6.16    1.57
   0  -2  -8    4.30    1.71
   0   2   9   73.56    4.19
   0  -2  -9   65.65    3.71
   0   2   9   67.67    3.94
   0  -2  -9   63.00    3.69
   0   2   9   76.54    4.74
   0   2  10  192.42    5.93
   0  -2 -10  180.86    5.80
   0   2  10  192.16    6.00
   0   2  11  317.78    7.57
   0  -3  11    1.49    0.90
   0   3 -11    2.24    1.00
   0  -3  10  148.10    6.34
   0  -3  10  136.22    5.12
   0  -3   9   27.27    3.08
   0  -3   9   24.94    2.54
   0   3  -9   29.22    3.27
   0  -3   9   24.11    2.55
   0  -3   8  411.50   11.56
   0  -3   8  385.11   12.45
   0  -3   8  389.51   11.60
   0  -3   7 1191.58   23.54
   0   3  -7 1170.05   24.20
   0  -3   7 1340.20   26.54
   0  -3   7 1361.91   27.33
   0  -3   7 1336.98   25.85
   0  -3   6  701.26   15.98
   0  -3   6  773.06   16.35
   0  -3   6  670.57   14.05
   0   3  -6  674.81   18.17
   0  -3   6  700.72   16.37
   0  -3   6  755.90   16.87
   0   3  -6  618.54   14.33
   0  -3   5  156.18    6.05
   0  -3   5  164.44    5.96
   0   3  -5  133.30    5.63
   0   3  -5  140.53    5.17
   0  -3   5  167.03    5.82
   0   3  -5  134.44    5.29
   0  -3   5  142.71    5.73
   0  -3   5  137.29    4.27
   0  -3   5  161.32    5.73
   0  -3   4  308.31    8.01
   0  -3   4  304.11    7.74
   0   3  -4  253.96    7.52
   0  -3   4  262.01    5.91
   0  -3   4  288.04    7.57
   0  -3   4  263.77    6.95
   0  -3   4  259.37    7.40
   0  -3   4  298.90    7.64
   0  -3   4  258.45    7.04
   0   3  -4  259.06    7.64
   0  -3   3 2144.27   34.66
   0  -3   3 2084.56   34.47
   0  -3   3 2026.99   33.91
   0  -3   3 1948.73   33.68
   0  -3   3 2132.93   34.26
   0  -3   3 2067.81   34.10
   0   3  -3 2084.46   34.70
   0   3  -3 2042.63   35.09
   0  -3   2 4613.46   75.55
   0   3  -2 4812.41   76.35
   0  -3   1  153.53    4.60
   0  -3   1  155.83    4.14
   0  -3   1  154.76    4.32
   0  -3   0  856.44   13.31
   0  -3   0  841.63   14.06
   0  -3   0  716.31   14.27
   0   3   1  112.90    3.84
   0   3   1  104.70    4.16
   0   3   1  105.67    2.92
   0   3   2 1125.56   20.08
   0  -3  -2 1089.66   20.57
   0   3   2 1100.61   20.55
   0   3   2 1084.42   19.25
   0  -3  -2 1102.02   20.61
   0  -3  -3 4790.97   72.27
   0  -3  -3 4245.44   70.66
   0   3   3 4855.07   72.47
   0  -3  -3 4041.29   71.55
   0  -3  -3 4056.90   71.57
   0  -3  -3 4144.79   70.63
   0   3   3 4601.98   71.28
   0   3   3 4132.78   70.00
   0   3   3 4377.16   70.43
   0   3   3 4586.38   70.86
   0  -3  -4    4.01    1.21
   0  -3  -4    3.23    1.10
   0   3   4    2.76    1.05
   0  -3  -4    3.25    1.16
   0  -3  -4    3.03    1.14
   0   3   4    3.53    1.09
   0  -3  -4    3.51    1.11
   0  -3  -4    5.69    1.04
   0   3   4    4.60    1.16
   0   3   4    3.74    0.96
   0  -3  -5   50.91    3.43
   0   3   5   49.80    3.19
   0  -3  -5   48.27    2.80
   0  -3  -5   39.42    2.82
   0   3   5   50.34    3.26
   0  -3  -5   55.73    3.36
   0  -3  -5   53.78    3.52
   0   3   5   48.78    3.01
   0   3   6  451.41   12.02
   0  -3  -6  439.07   11.69
   0  -3  -6  463.02   12.27
   0   3   6  373.07   10.11
   0   3   6  461.28   11.45
   0  -3  -6  449.21   12.10
   0  -3  -6  419.80   10.52
   0  -3  -6  380.15   10.75
   0   3   6  407.09   11.17
   0  -3  -7  173.82    7.05
   0   3   7  171.35    7.23
   0   3   7  150.07    5.86
   0   3   7  162.82    6.48
   0   3   7  178.84    7.28
   0  -3  -7  152.27    6.27
   0  -3  -7  155.28    6.02
   0  -3  -7  176.32    6.96
   0  -3  -7  181.68    7.08
   0   3   7  184.00    6.90
   0   3   8  191.17    7.70
   0  -3  -8  177.94    6.52
   0  -3  -8  172.71    6.32
   0   3   8  163.94    6.04
   0   3   8  190.67    7.49
   0   3   8  154.19    6.01
   0   3   9    1.78    1.16
   0   3   9    1.48    1.16
   0   3  10  187.83    5.96
   0   3  10  232.70    6.58
   0   4 -10   25.77    2.60
   0  -4  10   20.56    1.92
   0  -4  10   21.42    2.19
   0  -4   9  201.23    7.31
   0  -4   9  206.09    7.95
   0  -4   9  207.17    7.54
   0   4  -8   76.90    4.09
   0  -4   8   84.90    5.00
   0  -4   8   82.83    4.70
   0   4  -8   85.64    5.59
   0   4  -8   76.85    5.76
   0  -4   8   87.29    5.14
   0  -4   7  565.70   14.63
   0  -4   7  501.31   13.92
   0  -4   7  539.50   14.24
   0  -4   7  537.58   14.61
   0   4  -7  480.97   13.25
   0  -4   7  606.02   14.84
   0  -4   6    0.19    1.19
   0  -4   6    0.50    1.19
   0   4  -6    1.60    1.75
   0  -4   6    1.67    1.17
   0  -4   5   86.83    4.42
   0   4  -5   91.84    4.66
   0  -4   5   92.12    4.46
   0   4  -5   80.58    4.49
   0  -4   5   96.08    4.79
   0  -4   5  100.09    4.66
   0  -4   5   94.29    4.96
   0  -4   5   99.66    4.74
   0  -4   4   96.57    4.16
   0  -4   4   99.13    4.12
   0   4  -4   98.87    4.84
   0  -4   4  106.41    4.45
   0  -4   4   98.97    4.58
   0  -4   4  111.43    4.88
   0  -4   4   99.64    4.36
   0  -4   4   92.76    4.13
   0  -4   3 1404.59   24.48
   0   4  -3 1237.62   23.94
   0  -4   3 1421.78   25.30
   0   4  -3 1397.58   26.22
   0   4  -3 1254.08   24.03
   0  -4   3 1217.10   24.39
   0  -4   3 1339.82   24.50
   0  -4   3 1490.20   25.53
   0  -4   3 1403.82   24.88
   0  -4   3 1299.00   24.39
   0   4  -3 1271.57   23.92
   0  -4   3 1420.11   24.63
   0  -4   2  139.04    4.80
   0   4  -2  117.96    4.38
   0  -4   2  132.26    4.50
   0   4  -2  119.01    4.41
   0  -4   2  126.76    4.15
   0  -4   2  133.02    4.72
   0   4  -2  128.62    5.48
   0  -4   2  142.39    4.59
   0  -4   2  123.81    4.34
   0   4  -2  126.50    4.49
   0  -4   2  124.94    4.35
   0  -4   1 4347.60   70.86
   0   4  -1 4099.56   71.62
   0  -4   1 4461.90   70.83
   0   4  -1 4091.64   71.63
   0  -4   1 4287.12   70.69
   0  -4   1 4612.59   72.26
   0  -4   1 4542.95   71.29
   0  -4   1 4554.58   71.65
   0  -4   1 4283.88   70.56
   0  -4   1 4591.55   71.45
   0  -4   0 3046.55   54.50
   0   4   0 3213.81   55.45
   0  -4   0 3208.55   52.91
   0  -4   0 3454.70   53.27
   0  -4   0 3435.11   54.12
   0  -4   0 3118.48   52.67
   0  -4   0 3139.07   53.97
   0  -4   0 3182.60   52.77
   0   4   0 3327.12   53.23
   0   4   1  508.47   10.42
   0  -4  -1  538.87   11.55
   0  -4  -1  630.96   12.88
   0  -4  -1  628.19   12.24
   0  -4  -1  562.46   12.65
   0   4   1  566.00   11.75
   0   4   1  609.05   13.58
   0  -4  -1  667.14   12.16
   0   4   1  589.53   12.30
   0  -4  -1  570.93   13.70
   0  -4  -1  614.88   11.79
   0   4   2  413.09   10.23
   0   4   2  500.28   10.94
   0  -4  -2  482.27   11.39
   0  -4  -2  441.53    9.68
   0  -4  -2  477.60   10.04
   0  -4  -2  497.59   10.52
   0  -4  -2  477.11   11.34
   0  -4  -2  448.70    9.78
   0   4   2  447.53   11.03
   0   4   2  410.56    9.42
   0  -4  -3  331.94    7.97
   0   4   3  306.98    8.11
   0  -4  -3  347.47    9.66
   0  -4  -3  335.48    8.59
   0   4   3  326.49    8.83
   0   4   3  351.36    9.12
   0   4   3  316.88    8.13
   0  -4  -3  325.79    7.88
   0  -4  -3  356.84    9.75
   0   4   3  324.57    8.22
   0  -4  -4 2480.68   43.82
   0   4   4 2513.13   45.19
   0  -4  -4 2771.20   47.43
   0   4   4 2625.46   45.21
   0  -4  -4 2545.51   44.22
   0   4   4 2626.56   46.19
   0  -4  -4 2725.58   47.30
   0  -4  -4 2627.94   45.26
   0   4   4 2576.19   44.86
   0  -4  -4 2837.51   45.48
   0  -4  -5  113.90    5.73
   0  -4  -5  117.76    4.69
   0  -4  -5  127.05    5.29
   0  -4  -5  118.42    5.85
   0   4   5  126.88    5.60
   0   4   5  116.46    4.79
   0  -4  -5  121.48    5.20
   0   4   5  128.15    5.77
   0   4   5  127.94    5.16
   0   4   5  125.99    5.33
   0   4   6    2.67    1.46
   0  -4  -6    3.28    1.33
   0  -4  -6    4.78    1.26
   0  -4  -6    2.28    1.46
   0  -4  -6    2.10    1.36
   0   4   6    3.25    1.31
   0   4   6    2.73    1.29
   0   4   6    3.23    1.25
   0  -4  -6    3.29    1.42
   0  -4  -7  850.46   19.21
   0   4   7  815.85   19.29
   0  -4  -7  935.97   20.24
   0  -4  -7  855.78   18.33
   0   4   7  828.38   19.11
   0  -4  -7  937.86   20.25
   0  -4  -7  765.20   17.35
   0   4   8  189.38    7.01
   0   4   8  161.15    6.93
   0  -4  -8  156.40    5.71
   0   4   8  204.59    7.04
   0   4   8  151.39    6.11
   0   4   8  183.05    6.88
   0   4   9    6.83    1.49
   0   4  10   33.37    2.05
   0  -5  10  104.04    3.80
   0  -5  10  110.77    4.16
   0  -5  10  115.62    4.55
   0  -5   9 2344.66   42.58
   0  -5   9 2362.83   41.98
   0  -5   9 2412.85   43.24
   0  -5   9 2501.02   43.36
   0  -5   8  550.50   14.46
   0  -5   8  577.90   14.99
   0  -5   8  550.39   14.45
   0  -5   8  573.59   13.97
   0   5  -8  542.96   13.50
   0  -5   7  999.59   22.89
   0   5  -7 1009.97   21.96
   0  -5   7 1027.08   22.27
   0  -5   7 1017.61   22.28
   0  -5   6   19.77    2.73
   0  -5   6   15.77    2.38
   0  -5   6   13.90    1.96
   0   5  -6   12.65    2.04
   0  -5   6   13.86    2.14
   0   5  -6   15.30    2.48
   0  -5   5 2698.41   49.53
   0  -5   5 3005.68   49.10
   0  -5   5 2800.99   49.25
   0  -5   5 2694.15   48.00
   0   5  -5 2629.63   48.89
   0  -5   5 2885.99   48.73
   0  -5   5 2430.69   46.27
   0  -5   4    3.23    1.46
   0  -5   4    3.90    1.31
   0  -5   4    4.83    1.30
   0   5  -4    5.06    1.81
   0  -5   4    4.50    1.28
   0   5  -3  227.96    7.12
   0  -5   3  275.33    7.82
   0   5  -3  233.81    7.22
   0  -5   3  258.79    7.71
   0   5  -3  280.27    9.20
   0  -5   3  275.93    8.33
   0  -5   3  225.06    7.30
   0  -5   3  231.48    7.28
   0   5  -3  230.30    7.19
   0  -5   3  252.76    7.47
   0  -5   2   63.17    3.35
   0  -5   2   67.76    3.60
   0   5  -2   59.77    3.41
   0   5  -2   61.79    3.51
   0  -5   2   62.90    3.20
   0   5  -2   72.61    4.49
   0  -5   2   65.55    3.40
   0   5  -2   60.51    3.44
   0  -5   2   69.22    3.77
   0  -5   2   69.42    3.52
   0  -5   1 1582.77   28.00
   0  -5   1 1642.92   29.20
   0  -5   1 1556.76   27.95
   0  -5   1 1543.96   27.86
   0   5  -1 1581.69   29.10
   0   5  -1 1511.29   28.99
   0   5  -1 1505.23   29.07
   0  -5   1 1625.66   28.83
   0   5  -1 1416.32   27.12
   0  -5   1 1559.81   28.31
   0  -5   1 1560.96   27.65
   0  -5   0  460.29   10.35
   0   5   0  446.69   11.63
   0  -5   0  435.37    9.97
   0  -5   0  402.92    9.79
   0   5   0  451.33   10.41
   0  -5   0  445.23   10.23
   0   5   0  447.30   11.60
   0   5   0  402.13   10.97
   0  -5   0  469.73   11.48
   0   5   0  447.07   12.20
   0  -5   0  446.29   10.46
   0   5   1  813.89   16.86
   0   5   1  818.97   18.01
   0  -5  -1  807.38   16.05
   0  -5  -1  893.03   17.94
   0  -5  -1  846.47   16.36
   0  -5  -1  805.97   15.96
   0  -5  -1  756.74   15.50
   0   5   1  774.32   15.91
   0  -5  -1  757.58   15.88
   0  -5  -1  821.84   16.74
   0  -5  -2  248.96    8.21
   0   5   2  217.79    6.90
   0  -5  -2  217.96    6.24
   0   5   2  243.79    7.55
   0  -5  -2  245.57    8.20
   0  -5  -2  207.79    6.42
   0   5   2  217.86    7.35
   0  -5  -2  214.39    6.36
   0  -5  -2  234.02    6.77
   0  -5  -2  218.41    6.88
   0   5   3 1102.35   22.35
   0  -5  -3 1111.29   23.68
   0  -5  -3 1148.21   21.62
   0   5   3 1244.51   23.33
   0   5   3 1152.89   22.84
   0  -5  -3 1118.71   20.58
   0  -5  -3 1135.45   21.87
   0   5   3 1079.21   21.29
   0  -5  -3 1097.79   21.00
   0   5   3 1031.32   20.51
   0  -5  -3 1077.51   23.55
   0  -5  -3  999.85   21.10
   0   5   4  243.60    8.09
   0   5   4  243.68    8.28
   0  -5  -4  233.35    8.83
   0   5   4  264.51    8.72
   0  -5  -4  235.69    7.64
   0   5   4  221.46    7.13
   0  -5  -4  232.53    7.01
   0  -5  -4  245.02    7.55
   0  -5  -4  229.65    6.45
   0  -5  -4  229.86    8.82
   0   5   5  749.21   17.65
   0  -5  -5  794.84   18.51
   0   5   5  671.61   15.94
   0  -5  -5  714.83   16.27
   0  -5  -5  803.87   18.67
   0  -5  -5  702.58   16.40
   0   5   5  690.19   16.08
   0   5   6  259.25    9.15
   0   5   6  273.80    9.48
   0  -5  -6  292.02    9.90
   0  -5  -6  289.72    9.91
   0  -5  -6  246.47    8.47
   0   5   6  236.95    8.34
   0  -5  -6  263.98    8.25
   0   5   7    3.62    1.54
   0  -5  -7    2.47    1.24
   0   5   7    3.34    1.21
   0   5   7    2.80    1.36
   0   5   7    4.27    1.51
   0  -5  -7    2.65    1.15
   0   5   7    3.40    1.59
   0   5   8  443.83   11.06
   0   5   8  357.26   10.08
   0   5   8  430.67   10.91
   0  -5  -8  361.03   10.03
   0   5   9   24.64    2.15
   0  -5  -9   21.22    1.74
   0   6  -9  123.31    5.31
   0  -6   9  109.03    4.59
   0  -6   9  108.95    4.78
   0   6  -8   53.38    4.15
   0  -6   8   48.08    3.48
   0   6  -8   49.36    3.37
   0  -6   8   47.40    3.41
   0  -6   8   51.09    3.75
   0  -6   7   49.13    3.70
   0   6  -7   53.66    4.00
   0  -6   7   51.52    3.95
   0  -6   7   58.28    4.08
   0  -6   7   52.25    4.20
   0  -6   6    4.64    1.69
   0  -6   6    2.60    1.67
   0   6  -6    2.24    1.31
   0   6  -6    3.90    1.80
   0  -6   5  186.29    8.20
   0  -6   5  206.35    7.62
   0  -6   5  182.03    7.18
   0  -6   5  185.17    7.30
   0  -6   5  186.55    7.85
   0   6  -5  186.13    7.94
   0  -6   4  195.12    7.24
   0  -6   4  177.45    7.42
   0  -6   4  201.88    7.26
   0  -6   4  184.34    7.25
   0   6  -4  204.80    8.43
   0   6  -4  174.31    6.37
   0  -6   4  177.65    6.79
   0  -6   3   43.72    3.16
   0  -6   3   38.93    3.34
   0   6  -3   40.18    3.07
   0   6  -3   36.59    2.89
   0  -6   3   44.59    3.22
   0   6  -3   37.59    2.91
   0   6  -3   41.87    3.86
   0  -6   3   41.35    3.47
   0  -6   3   43.52    3.03
   0  -6   3   41.36    3.26
   0  -6   2  403.68   11.31
   0   6  -2  378.93   10.86
   0  -6   2  413.56   11.57
   0   6  -2  407.73   11.34
   0  -6   2  419.37   10.89
   0  -6   2  398.44   10.22
   0  -6   2  399.42   10.49
   0   6  -2  373.59   10.87
   0  -6   2  440.44   11.21
   0  -6   1  460.64   11.36
   0   6  -1  468.95   13.36
   0   6  -1  459.97   12.38
   0  -6   1  438.40   11.02
   0   6  -1  430.65   12.08
   0  -6   1  478.65   11.64
   0   6  -1  437.50   12.21
   0  -6   1  447.66   11.64
   0   6  -1  432.01   10.48
   0  -6   1  445.41   10.80
   0  -6   0 2993.22   51.90
   0  -6   0 2941.61   51.44
   0  -6   0 2926.36   52.10
   0  -6   0 3144.26   51.93
   0   6   0 3111.98   54.38
   0   6   0 3130.83   53.90
   0   6   0 3153.81   54.52
   0   6   0 3003.68   51.93
   0   6   0 3191.94   55.04
   0  -6   0 2886.62   51.38
   0   6   1    4.52    1.12
   0  -6  -1    6.22    1.57
   0  -6  -1    5.31    1.23
   0   6   1    4.93    1.60
   0  -6  -1    4.41    1.14
   0  -6  -1    5.07    1.20
   0   6   1    5.94    1.42
   0   6   1   11.53    2.15
   0   6   1   12.19    2.20
   0   6   1    5.31    1.63
   0  -6  -1    6.85    1.26
   0  -6  -1    6.27    1.36
   0  -6  -2   32.18    2.62
   0   6   2   36.81    3.05
   0   6   2   31.10    2.80
   0   6   2   31.38    2.59
   0   6   2   31.83    3.34
   0   6   2   35.18    3.22
   0   6   2   33.14    3.39
   0  -6  -2   30.86    2.40
   0  -6  -2   30.28    2.28
   0  -6  -2   31.27    2.74
   0  -6  -3  207.85    7.15
   0   6   3  219.45    7.98
   0   6   3  212.61    8.70
   0   6   3  201.41    7.37
   0   6   3  211.58    7.92
   0  -6  -3  190.07    6.12
   0  -6  -3  195.74    6.69
   0   6   3  210.68    8.68
   0  -6  -3  199.68    7.14
   0   6   4  914.55   20.00
   0  -6  -4  865.39   18.91
   0   6   4  861.00   19.63
   0   6   4  922.56   20.50
   0  -6  -4  882.93   19.16
   0  -6  -4  836.61   18.59
   0  -6  -5 1954.79   36.47
   0   6   5 2103.08   39.66
   0   6   5 1879.16   35.91
   0  -6  -5 1817.00   35.60
   0   6   5 2115.43   39.85
   0  -6  -5 1930.09   35.87
   0   6   5 2015.39   37.50
   0   6   6   52.58    4.21
   0   6   6   49.51    3.73
   0  -6  -6   43.29    3.09
   0  -6  -6   46.60    3.12
   0   6   6   54.22    4.23
   0   6   6   47.94    3.87
   0  -6  -6   44.63    3.34
   0   6   7   83.97    4.65
   0   6   7   92.29    4.90
   0  -6  -7   84.66    3.96
   0  -6  -7   75.28    3.52
   0   6   7   92.78    4.96
   0   6   7   82.92    4.58
   0   6   8  295.99    7.73
   0  -6  -8  282.07    6.99
   0   6   8  299.24    7.74
   0   6   8  289.30    8.20
   0  -7   9    7.87    1.19
   0   7  -9    8.32    1.30
   0  -7   8  115.11    4.67
   0  -7   8  124.79    5.33
   0   7  -8  130.69    4.96
   0   7  -7    1.21    1.31
   0  -7   7    0.60    0.94
   0  -7   7    2.09    1.40
   0  -7   7    2.32    1.38
   0  -7   6    1.39    1.44
   0  -7   6    0.58    1.14
   0   7  -6    1.20    1.59
   0   7  -6    0.52    1.07
   0  -7   5 1144.99   23.22
   0   7  -5 1203.11   25.07
   0  -7   5  954.12   22.35
   0  -7   5 1149.26   24.57
   0  -7   5 1013.65   22.64
   0   7  -5 1152.45   24.85
   0   7  -4  107.65    5.08
   0  -7   4  116.88    5.60
   0  -7   4  115.08    5.59
   0   7  -4  119.75    6.50
   0   7  -4  127.41    6.74
   0  -7   4  112.98    6.08
   0  -7   3  214.05    7.55
   0  -7   3  245.09    8.57
   0   7  -3  226.32    8.08
   0  -7   3  231.85    8.80
   0  -7   3  219.62    8.60
   0  -7   3  210.32    7.69
   0   7  -3  219.69    7.78
   0   7  -3  248.30    9.81
   0   7  -3  222.37    7.78
   0  -7   3  216.21    7.99
   0  -7   2   16.34    2.25
   0  -7   2    9.29    1.92
   0   7  -2    9.37    1.84
   0  -7   2    9.92    1.69
   0  -7   2    9.19    2.16
   0   7  -2    9.38    1.83
   0  -7   2    7.72    1.66
   0  -7   2   10.16    1.72
   0   7  -2    8.48    1.89
   0  -7   1   95.40    4.52
   0  -7   1   97.65    4.99
   0   7  -1  103.87    5.53
   0   7  -1  105.42    6.08
   0  -7   1   90.85    4.89
   0   7  -1  100.36    5.39
   0   7  -1   98.14    5.45
   0  -7   1   91.62    4.38
   0  -7   1   92.74    4.78
   0   7   0  517.83   14.45
   0  -7   0  489.71   12.09
   0  -7   0  502.90   12.87
   0   7   0  512.02   12.72
   0   7   0  542.47   14.43
   0   7   0  517.69   14.51
   0  -7   0  508.54   12.70
   0   7   0  530.80   14.57
   0  -7   0  488.40   12.05
   0  -7   0  480.67   12.68
   0  -7  -1  844.98   18.61
   0  -7  -1  892.34   19.37
   0   7   1  979.40   22.13
   0   7   1  960.36   21.32
   0   7   1  873.15   20.49
   0  -7  -1  862.07   18.37
   0  -7  -1  862.49   18.56
   0   7   1  980.77   22.21
   0  -7  -1  853.44   19.72
   0   7   1  933.53   19.77
   0   7   2 2426.75   42.77
   0  -7  -2 2134.70   39.24
   0   7   2 2256.58   40.04
   0   7   2 2398.19   42.66
   0  -7  -2 1988.18   37.32
   0  -7  -2 2088.91   38.78
   0  -7  -2 2093.46   37.80
   0   7   2 1963.92   37.81
   0   7   2 2048.00   38.66
   0  -7  -3  602.16   14.83
   0   7   3  637.61   15.89
   0  -7  -3  597.92   13.99
   0   7   3  598.24   14.69
   0   7   3  638.34   16.08
   0  -7  -3  602.74   14.96
   0   7   3  663.84   17.64
   0   7   3  676.44   17.77
   0   7   4  533.01   13.68
   0  -7  -4  497.84   13.02
   0  -7  -4  536.63   13.23
   0  -7  -4  512.14   12.39
   0   7   4  501.01   13.31
   0   7   5  285.16   10.15
   0   7   5  261.60    9.29
   0   7   5  259.95    8.62
   0  -7  -5  257.49    7.94
   0   7   5  255.36    7.90
   0   7   5  286.21   10.11
   0  -7  -5  263.77    7.66
   0   7   6   11.33    1.98
   0   7   6   10.91    1.76
   0  -7  -6   10.28    1.34
   0   7   6   12.43    2.01
   0  -7  -6    9.80    1.37
   0   7   7    0.51    0.79
   0   7   7    0.52    0.77
   0   7   7    0.19    0.81
   0   8  -7   -0.32    0.96
   0  -8   7   -0.11    0.91
   0  -8   7    0.30    0.89
   0   8  -7    0.12    0.91
   0  -8   7    0.63    0.70
   0  -8   6  225.11    7.76
   0   8  -6  244.17    8.03
   0  -8   5   69.76    3.89
   0  -8   5   80.31    4.19
   0   8  -4  461.17   11.49
   0  -8   4  502.78   13.59
   0   8  -4  478.76   13.83
   0  -8   4  449.58   11.70
   0  -8   4  419.75   11.43
   0  -8   4  449.91   12.99
   0  -8   3  354.47   11.14
   0   8  -3  385.97   11.88
   0  -8   3  347.00    9.83
   0   8  -3  373.88   10.75
   0  -8   3  374.63   11.49
   0  -8   3  331.19    9.76
   0   8  -3  352.15   10.04
   0   8  -3  357.42   10.02
   0   8  -2  379.05   11.09
   0   8  -2  380.73   11.05
   0   8  -2  373.88   12.17
   0   8  -2  383.52   11.37
   0   8  -2  364.63   11.46
   0  -8   2  385.82   11.76
   0  -8   2  353.54   10.91
   0  -8   2  340.97    9.76
   0  -8   1   11.70    1.99
   0   8  -1   12.01    2.29
   0  -8   1   10.55    1.87
   0   8  -1   12.16    2.14
   0   8  -1   14.39    2.22
   0  -8   1   12.63    1.75
   0   8  -1   13.79    2.31
   0  -8   0  285.03    9.09
   0  -8   0  290.22    9.47
   0   8   0  327.21   10.80
   0   8   0  348.90   10.98
   0   8   0  333.36   10.81
   0  -8   0  294.72    8.62
   0  -8   0  316.48   10.39
   0   8   0  315.78    9.05
   0   8   0  307.40   10.41
   0   8   1  677.40   17.00
   0   8   1  673.20   16.62
   0  -8  -1  624.41   15.44
   0  -8  -1  602.20   13.69
   0   8   1  597.46   15.13
   0   8   1  675.45   17.07
   0   8   1  616.36   14.08
   0  -8  -1  575.67   14.64
   0  -8  -1  557.60   13.68
   0   8   2  122.25    6.44
   0   8   2  125.29    6.46
   0  -8  -2   97.57    4.93
   0   8   2  123.26    5.68
   0  -8  -2  105.97    5.28
   0  -8  -2  104.06    4.44
   0  -8  -3    7.21    1.26
   0   8   3   10.02    2.17
   0   8   3   11.04    2.20
   0  -8  -3    7.45    1.69
   0   8   3    9.24    1.85
   0   8   3    8.54    1.77
   0   8   4    2.55    1.46
   0   8   4    0.81    1.28
   0   8   4    1.61    1.22
   0   8   4    2.21    1.11
   0  -8  -4    0.98    1.03
   0   8   4    1.64    0.95
   0  -8  -4    1.42    0.74
   0   8   5  200.10    6.81
   0  -8  -5  193.12    5.71
   0   8   5  175.57    5.43
   0   8   5  172.05    5.71
   0   8   6  452.41   10.35
   0   8   6  536.85   11.77
   0   8   6  479.37   11.39
   0   8   6  534.79   11.74
   0  -9   6   27.88    2.18
   0  -9   5  273.19    7.75
   0  -9   5  214.31    5.92
   0  -9   4    9.09    1.76
   0  -9   4    7.65    1.53
   0   9  -4    9.18    1.76
   0  -9   4    6.17    1.10
   0  -9   3  172.68    6.79
   0   9  -3  173.15    6.04
   0  -9   3  161.16    6.20
   0   9  -2  421.05   11.28
   0   9  -2  432.39   11.37
   0   9  -2  399.91   10.40
   0   9  -2  399.86   10.32
   0  -9   2  373.22   10.55
   0  -9   1    0.94    0.74
   0   9  -1    1.75    1.11
   0   9  -1    2.21    1.19
   0   9  -1    1.34    1.25
   0   9  -1    2.28    1.14
   0  -9   1    1.78    1.03
   0   9   0  197.89    6.10
   0   9   0  211.67    7.52
   0  -9   0  159.36    5.69
   0  -9   0  182.97    6.99
   0  -9   0  150.22    5.28
   0   9   0  203.88    7.38
   0   9   0  202.04    7.33
   0   9   1   15.15    2.13
   0  -9  -1   11.14    1.31
   0   9   1   16.74    2.24
   0   9   1   13.30    2.05
   0  -9  -1   13.67    2.01
   0   9   2  280.62    8.70
   0   9   2  301.94    9.25
   0   9   2  301.04    9.29
   0  -9  -2  270.07    8.20
   0   9   3  305.97    9.02
   0   9   3  280.62    8.03
   0   9   3  284.76    8.17
   0   9   3  311.67    9.12
   0  -9  -3  277.90    7.78
   0   9   4   50.37    3.07
   0   9   4   40.88    2.31
   0   9   4   48.22    3.04
   0   9   4   42.73    2.71
   0 -10   3   11.25    1.54
   0 -10   1   89.17    3.94
   0 -10   0    4.59    1.10
   0  10   0    5.29    1.16
   0 -10  -1   51.73    2.65
   0  10   1   60.66    3.01
  -1  10   1  147.94    5.14
   1 -10   0  103.08    4.04
   1 -10   1   57.00    3.12
   1 -10   2   29.42    2.32
  -1  10  -2   34.11    2.24
  -1  10  -3   54.63    2.82
  -1   9   4    3.39    0.97
  -1   9   4    3.55    1.04
  -1   9   4    3.95    1.20
  -1   9   4    3.37    1.17
  -1   9   3   62.08    3.57
   1  -9  -3   56.96    2.93
  -1   9   3   65.32    3.91
  -1   9   3   63.09    3.47
  -1   9   3   67.40    3.97
   1  -9  -2   42.30    2.92
  -1   9   2   47.45    2.98
  -1   9   2   48.18    3.43
  -1   9   2   47.84    3.42
  -1   9   1 1162.98   23.72
  -1   9   1 1135.24   21.82
  -1   9   1 1157.50   22.03
   1  -9  -1 1084.35   22.90
  -1   9   1 1160.61   23.77
  -1   9   0   16.24    2.05
  -1   9   0   15.14    1.96
  -1   9   0   18.10    2.34
   1  -9   0   14.66    2.12
   1  -9   1   15.93    1.76
  -1   9  -1   21.68    2.11
  -1   9  -1   22.06    2.45
  -1   9  -1   20.38    2.06
   1  -9   1   17.29    2.33
   1  -9   2   12.43    1.62
  -1   9  -2   13.36    2.15
   1  -9   2   10.35    1.97
  -1   9  -2   12.65    1.86
   1  -9   2   10.32    1.60
   1  -9   3  244.83    7.28
  -1   9  -3  254.85    7.34
   1  -9   3  242.98    7.72
   1  -9   4    0.48    0.94
   1  -9   4    0.65    0.79
   1  -9   5    0.69    1.06
   1  -9   5   -0.03    0.84
  -1   9  -5    0.62    1.09
   1  -9   5    0.68    0.75
   1  -9   6   11.14    1.50
   1  -9   6   12.59    1.45
  -1   9  -6   12.24    1.52
  -1   8   6    3.43    1.08
  -1   8   6    1.35    0.69
  -1   8   5    3.25    1.25
  -1   8   5    3.36    1.46
  -1   8   5    2.83    1.01
  -1   8   5    3.05    1.35
  -1   8   4   51.88    4.07
  -1   8   4   52.44    4.09
  -1   8   4   53.44    3.66
   1  -8  -4   43.19    2.79
  -1   8   4   50.07    3.49
  -1   8   3   18.74    2.76
  -1   8   3   19.71    2.80
  -1   8   3   20.26    2.42
   1  -8  -3   17.27    2.10
   1  -8  -2  172.63    6.90
  -1   8   2  197.73    8.16
  -1   8   2  195.15    8.13
   1  -8  -2  165.37    6.72
  -1   8   2  188.71    7.10
  -1   8   1   -0.06    1.27
   1  -8  -1    0.69    1.29
   1  -8  -1    0.91    1.14
   1  -8  -1    0.82    0.94
  -1   8   1    0.55    0.98
  -1   8   1    0.23    1.44
  -1   8   1    0.34    1.27
   1  -8  -1    0.76    0.98
  -1   8   1   -0.17    1.20
   1  -8   0  991.97   22.26
   1  -8   0 1032.88   21.46
   1  -8   0  897.09   19.62
   1  -8   0 1040.82   23.02
  -1   8   0 1126.02   24.65
  -1   8   0 1070.19   23.04
   1  -8   0 1135.67   22.28
  -1   8   0 1085.99   23.01
  -1   8   0 1231.54   24.18
  -1   8   0 1105.10   21.25
   1  -8   0  928.92   20.62
   1  -8   1  178.25    5.92
  -1   8  -1  173.79    8.19
  -1   8  -1  179.29    7.47
  -1   8  -1  172.35    6.85
   1  -8   1  185.26    7.07
   1  -8   1  167.15    6.49
  -1   8  -1  169.06    6.84
   1  -8   1  167.32    7.08
   1  -8   1  164.85    7.29
   1  -8   1  160.18    6.54
   1  -8   2    2.36    1.63
   1  -8   2    1.64    1.36
   1  -8   2    3.10    1.37
   1  -8   2    2.57    1.31
  -1   8  -2    4.31    1.54
   1  -8   2    2.01    0.95
   1  -8   2    4.18    1.46
  -1   8  -3   94.69    5.91
   1  -8   3  102.01    5.19
  -1   8  -3   89.13    4.55
   1  -8   3   73.13    3.84
   1  -8   3   83.73    4.84
   1  -8   3   90.57    4.78
   1  -8   3   84.31    4.94
   1  -8   4  273.24    8.90
   1  -8   4  277.75    9.90
   1  -8   4  261.15    9.33
  -1   8  -4  279.66   10.24
  -1   8  -4  299.84   10.03
   1  -8   5    3.25    1.31
   1  -8   5    2.87    0.99
  -1   8  -5    2.34    1.57
   1  -8   5    3.01    1.52
   1  -8   6    9.32    1.82
   1  -8   6    7.16    1.15
   1  -8   6   11.55    2.01
   1  -8   6   11.21    1.70
  -1   8  -6   11.50    1.94
  -1   7   7   51.55    3.41
  -1   7   7   44.57    2.97
  -1   7   7   50.36    3.34
  -1   7   7   50.25    3.03
  -1   7   6   16.83    2.06
   1  -7  -5  111.32    4.16
   1  -7  -5  108.13    4.54
  -1   7   5  123.17    5.41
  -1   7   5  122.53    5.49
  -1   7   5  125.49    5.94
  -1   7   5  127.76    6.64
  -1   7   5  127.77    6.65
   1  -7  -5  113.76    5.37
   1  -7  -4  109.32    4.30
  -1   7   4  126.82    6.00
  -1   7   4  120.73    5.87
  -1   7   4  133.14    6.87
   1  -7  -4  109.23    4.91
  -1   7   4  129.83    6.84
   1  -7  -4  115.07    5.49
  -1   7   4  101.84    5.06
   1  -7  -4  111.74    4.91
   1  -7  -3  194.44    6.16
   1  -7  -3  194.77    7.10
   1  -7  -3  204.95    7.59
  -1   7   3  220.05    8.11
  -1   7   3  228.03    9.26
  -1   7   3  193.19    6.99
  -1   7   3  230.76    9.19
   1  -7  -3  202.44    7.09
  -1   7   3  218.08    8.38
   1  -7  -2 1776.94   34.06
   1  -7  -2 1733.18   32.49
  -1   7   2 1926.10   36.75
  -1   7   2 1918.22   36.84
   1  -7  -2 1713.71   31.78
  -1   7   2 1948.66   34.96
  -1   7   2 1756.87   35.29
   1  -7  -2 1736.53   33.77
   1  -7  -2 1791.31   33.46
  -1   7   1  977.39   21.40
   1  -7  -1  862.18   19.80
   1  -7  -1  899.58   18.93
  -1   7   1  968.96   19.93
   1  -7  -1  784.62   17.81
   1  -7  -1  905.54   19.76
  -1   7   1  911.79   21.30
  -1   7   1  928.09   21.23
   1  -7  -1  903.31   19.25
  -1   7   1  890.96   21.79
   1  -7  -1  860.38   17.68
   1  -7   0  194.64    6.99
   1  -7   0  190.91    7.52
   1  -7   0  174.34    6.56
  -1   7   0  198.52    7.89
  -1   7   0  198.75    8.84
  -1   7   0  200.73    6.85
   1  -7   0  190.19    6.95
  -1   7   0  199.02    7.86
   1  -7   0  184.54    7.20
  -1   7   0  208.24    8.16
   1  -7   0  173.99    5.92
  -1   7  -1  489.30   13.09
   1  -7   1  477.76   12.92
   1  -7   1  511.08   13.99
   1  -7   1  491.81   12.91
   1  -7   1  480.64   11.74
  -1   7  -1  511.67   13.90
   1  -7   1  498.15   13.25
  -1   7  -1  515.73   15.47
  -1   7  -1  485.16   13.11
   1  -7   2    3.23    1.52
  -1   7  -2    2.16    1.36
   1  -7   2    1.93    1.31
  -1   7  -2    3.39    1.18
  -1   7  -2    2.72    1.14
  -1   7  -2    4.47    2.08
   1  -7   2    3.24    1.54
   1  -7   2    5.46    1.51
   1  -7   2    4.08    1.17
   1  -7   3   34.78    3.24
  -1   7  -3   34.44    2.98
   1  -7   3   35.61    3.15
  -1   7  -3   38.12    4.03
   1  -7   3   39.70    3.46
   1  -7   3   31.76    3.36
   1  -7   4   90.53    4.66
   1  -7   4   92.34    5.52
  -1   7  -4  105.52    6.20
   1  -7   4   93.18    5.32
   1  -7   4  106.77    6.13
   1  -7   4  110.13    5.54
   1  -7   4  106.38    5.52
   1  -7   5   19.82    2.84
  -1   7  -5   24.16    2.94
   1  -7   5   20.06    2.56
   1  -7   5   23.49    2.70
   1  -7   5   21.69    3.01
   1  -7   6  720.61   17.68
   1  -7   6  744.80   17.05
   1  -7   7   11.05    2.05
   1  -7   7    7.92    1.44
   1  -7   7    9.21    1.75
   1  -7   7    9.79    1.90
  -1   7  -7    9.94    1.84
   1  -7   8    2.99    0.86
  -1   7  -8    2.14    0.89
   1  -7   8    4.05    1.26
   1  -7   8    3.15    1.25
  -1   6   8  127.53    5.17
  -1   6   8  141.93    5.52
  -1   6   8  139.15    5.42
  -1   6   7    4.35    1.56
  -1   6   7    4.20    1.38
  -1   6   7    2.72    1.42
  -1   6   7    2.96    1.36
   1  -6  -7    3.02    0.89
   1  -6  -6 1825.30   33.67
  -1   6   6 1580.38   29.51
   1  -6  -6 1481.34   28.61
   1  -6  -6 1639.42   31.23
   1  -6  -6 1510.60   29.10
   1  -6  -6 1552.22   29.67
   1  -6  -6 1845.64   33.63
  -1   6   6 1596.93   31.49
  -1   6   6 1683.70   31.82
  -1   6   5   11.62    1.94
   1  -6  -5   12.42    2.02
   1  -6  -5   12.36    1.61
   1  -6  -5    9.85    1.61
   1  -6  -5   10.87    1.72
  -1   6   5   11.03    2.00
   1  -6  -5   11.38    2.32
   1  -6  -5   13.22    2.55
   1  -6  -4   76.57    5.12
   1  -6  -4   73.80    4.25
  -1   6   4   74.58    4.59
   1  -6  -4   68.58    3.54
   1  -6  -4   73.05    4.00
   1  -6  -4   78.17    5.18
   1  -6  -4   67.14    3.79
  -1   6   4   80.39    4.80
  -1   6   4   74.89    4.39
  -1   6   3   13.53    1.88
  -1   6   3   12.06    2.01
   1  -6  -3   14.45    1.88
   1  -6  -3   14.69    1.95
  -1   6   3   11.41    2.00
   1  -6  -3   12.54    1.82
   1  -6  -3   11.62    2.20
   1  -6  -3   13.55    1.58
  -1   6   2  105.92    5.01
  -1   6   2  100.40    5.59
   1  -6  -2  118.15    4.31
   1  -6  -2   83.01    4.01
   1  -6  -2   90.72    4.49
   1  -6  -2   97.79    4.59
  -1   6   2   90.72    4.22
   1  -6  -2  101.80    4.73
   1  -6  -1  734.74   16.58
  -1   6   1  793.70   16.81
  -1   6   1  773.58   19.40
   1  -6  -1  719.04   15.46
   1  -6  -1  756.56   16.56
   1  -6  -1  766.68   16.85
   1  -6  -1  717.73   15.25
   1  -6  -1  795.94   16.10
   1  -6   0    1.25    0.98
  -1   6   0    1.34    1.12
  -1   6   0    2.49    1.83
   1  -6   0    1.58    1.14
  -1   6   0    1.96    1.01
   1  -6   0    1.83    1.12
  -1   6   0    2.10    1.23
   1  -6   0    2.82    1.30
   1  -6   0    1.81    0.99
   1  -6   0    1.00    0.75
   1  -6   1  285.33    8.22
   1  -6   1  270.56    8.38
  -1   6  -1  258.22    7.44
  -1   6  -1  265.91    8.49
   1  -6   1  274.41    8.88
   1  -6   1  266.20    8.17
  -1   6  -1  261.93    8.42
   1  -6   1  257.43    7.41
   1  -6   1  274.03    8.32
   1  -6   2    9.95    1.82
   1  -6   2    9.32    1.70
   1  -6   2    9.20    1.76
  -1   6  -2    8.76    2.32
  -1   6  -2    7.69    1.39
  -1   6  -2    9.16    1.72
   1  -6   2    9.62    1.71
   1  -6   2    7.53    1.28
  -1   6  -2    6.85    1.36
  -1   6  -3  283.59   10.61
   1  -6   3  302.36    9.16
   1  -6   3  280.49    9.04
   1  -6   3  298.58    9.17
   1  -6   3  275.38    9.46
   1  -6   4  103.77    4.98
  -1   6  -4  105.00    6.08
   1  -6   4  101.92    5.73
   1  -6   4  103.88    5.39
   1  -6   4  120.68    5.63
   1  -6   4  102.66    5.76
   1  -6   5   27.84    2.96
   1  -6   5   29.50    3.11
   1  -6   5   27.08    3.31
   1  -6   5   28.59    3.12
  -1   6  -5   28.99    3.25
   1  -6   6    4.18    1.89
   1  -6   6    2.84    1.29
  -1   6  -6    3.36    1.37
   1  -6   6    2.73    1.40
   1  -6   6    5.48    1.77
  -1   6  -6    4.16    1.78
   1  -6   6    5.87    2.02
   1  -6   7  392.00   11.59
   1  -6   7  393.33   11.79
   1  -6   7  387.99   12.07
  -1   6  -7  365.25   10.94
   1  -6   8   45.70    3.46
   1  -6   8   42.92    3.48
   1  -6   8   42.69    3.04
  -1   6  -8   38.96    2.69
  -1   6  -9   56.06    3.54
   1  -6   9   48.97    2.79
   1  -6   9   50.32    3.21
  -1   5   9  742.08   15.24
  -1   5   9  745.11   15.29
  -1   5   8   41.47    2.97
   1  -5  -8   40.86    2.74
   1  -5  -8   39.75    2.69
  -1   5   8   47.69    3.50
   1  -5  -7  494.50   12.62
  -1   5   7  559.22   14.28
   1  -5  -7  571.89   15.04
   1  -5  -7  505.53   13.34
   1  -5  -7  573.84   15.07
  -1   5   7  470.65   12.92
  -1   5   7  501.23   13.29
   1  -5  -6 1312.05   26.05
   1  -5  -6 1307.84   27.75
  -1   5   6 1222.12   25.37
  -1   5   6 1313.15   26.52
   1  -5  -6 1299.18   27.75
   1  -5  -6 1280.07   25.29
  -1   5   6 1351.97   27.04
   1  -5  -6 1229.12   24.05
  -1   5   6 1260.97   24.71
   1  -5  -5  126.53    5.29
  -1   5   5  132.19    5.98
   1  -5  -5  125.24    6.51
   1  -5  -5  116.68    4.77
  -1   5   5  117.99    5.07
   1  -5  -5  119.45    6.33
   1  -5  -5  130.16    5.53
   1  -5  -4  235.66    7.41
   1  -5  -4  217.36    8.41
  -1   5   4  219.63    6.65
  -1   5   4  218.51    7.12
   1  -5  -4  228.72    7.18
  -1   5   4  227.27    7.76
   1  -5  -4  229.78    6.92
  -1   5   4  248.48    8.08
   1  -5  -4  220.11    8.40
   1  -5  -3    1.11    1.01
  -1   5   3    0.25    0.59
  -1   5   3    0.32    0.94
  -1   5   3    1.17    1.27
   1  -5  -3    2.93    1.06
   1  -5  -3    0.55    1.09
   1  -5  -3    0.82    0.91
   1  -5  -3    0.68    1.18
   1  -5  -3    0.96    1.16
   1  -5  -3    2.49    0.83
  -1   5   3    0.97    0.93
   1  -5  -2  279.00    7.43
   1  -5  -2  312.52    8.24
   1  -5  -2  317.76    9.07
   1  -5  -2  301.49    9.09
   1  -5  -2  301.19    7.74
  -1   5   2  299.27   10.25
  -1   5   2  338.66    9.00
   1  -5  -2  303.35    8.21
  -1   5   2  298.93    8.13
   1  -5  -2  320.38    8.45
   1  -5  -1  192.93    6.92
   1  -5  -1  201.64    5.96
   1  -5  -1  207.05    5.78
  -1   5   1  219.97    6.74
   1  -5  -1  221.88    6.71
  -1   5   1  204.26    8.31
   1  -5  -1  218.01    6.28
   1  -5  -1  237.83    6.73
   1  -5  -1  201.23    7.00
  -1   5   1  199.56    5.88
   1  -5  -1  219.48    6.64
   1  -5  -1  238.27    7.23
   1  -5  -1  228.81    7.49
   1  -5   0 1028.30   19.56
   1  -5   0  990.64   19.09
   1  -5   0  961.72   19.53
  -1   5   0  995.26   19.05
   1  -5   0 1009.49   19.12
   1  -5   0  986.44   19.34
   1  -5   0  928.95   18.22
  -1   5   0  979.78   22.57
   1  -5   0 1014.82   19.53
  -1   5  -1  162.45    5.84
   1  -5   1  166.88    5.43
   1  -5   1  169.30    6.04
   1  -5   1  155.70    4.99
  -1   5  -1  174.96    7.63
  -1   5  -1  155.19    5.03
   1  -5   1  171.70    5.74
   1  -5   1  183.62    5.90
   1  -5   1  158.99    5.58
  -1   5  -1  158.43    5.76
   1  -5   1  182.46    5.96
   1  -5   1  160.59    5.54
  -1   5  -2 1120.28   23.53
   1  -5   2 1317.72   23.74
   1  -5   2 1456.33   25.04
   1  -5   2 1262.31   23.95
   1  -5   2 1281.26   23.59
   1  -5   2 1409.40   25.16
   1  -5   2 1357.32   25.44
  -1   5  -2 1152.37   23.59
   1  -5   2 1266.78   24.35
  -1   5  -2 1487.18   28.59
   1  -5   3 6542.62  100.57
   1  -5   3 5545.50   98.23
   1  -5   3 6548.37  101.53
   1  -5   3 6281.51  100.26
   1  -5   3 6218.30   99.36
   1  -5   3 6382.45  101.45
  -1   5  -3 6361.92  103.43
  -1   5  -3 5800.71   99.25
   1  -5   4  515.67   12.83
   1  -5   4  505.41   13.12
   1  -5   4  457.93   11.84
   1  -5   4  503.11   13.33
   1  -5   4  493.53   12.33
  -1   5  -4  512.15   13.90
   1  -5   5  150.87    6.79
   1  -5   5  139.81    5.90
   1  -5   5  125.40    4.94
   1  -5   5  162.72    6.54
  -1   5  -5  140.43    6.50
   1  -5   5  149.31    6.90
   1  -5   5  154.95    6.48
   1  -5   6   37.08    2.83
   1  -5   6   42.56    3.85
   1  -5   6   43.72    3.55
  -1   5  -6   34.36    3.34
   1  -5   6   36.84    3.45
   1  -5   6   37.52    3.80
   1  -5   6   36.11    3.20
  -1   5  -6   31.57    2.96
   1  -5   7  449.45   13.24
   1  -5   7  396.36   11.74
   1  -5   7  414.13   12.44
   1  -5   7  383.06   10.91
  -1   5  -7  394.71   11.37
   1  -5   7  452.57   12.47
  -1   5  -7  419.64   14.42
   1  -5   8    1.66    1.41
   1  -5   8    1.60    1.18
   1  -5   8    2.18    1.10
   1  -5   8    1.97    1.54
  -1   5  -8    2.68    1.75
   1  -5   9  252.74    8.24
   1  -5   9  257.88    8.05
   1  -5   9  240.79    7.76
   1  -5  10 1220.34   23.27
   1  -5  10 1263.66   23.28
   1  -5  10 1271.46   23.15
  -1   4  10  645.03   13.40
  -1   4   9  107.02    4.92
   1  -4  -9   88.58    4.01
  -1   4   8  283.82    8.21
   1  -4  -8  276.26    9.21
  -1   4   8  233.22    7.77
   1  -4  -8  263.29    9.02
  -1   4   8  232.11    8.50
   1  -4  -8  241.80    7.92
  -1   4   7  605.74   15.49
   1  -4  -7  627.56   16.34
  -1   4   7  587.28   14.89
   1  -4  -7  624.39   16.31
   1  -4  -7  633.95   14.99
   1  -4  -6 1824.70   34.61
  -1   4   6 1935.62   36.63
   1  -4  -6 1936.72   36.01
   1  -4  -6 2050.31   36.67
  -1   4   6 2036.55   35.59
  -1   4   6 1894.46   36.52
   1  -4  -6 1999.28   38.25
  -1   4   6 1961.81   37.14
   1  -4  -6 2079.00   38.50
  -1   4   5    9.87    1.39
  -1   4   5    8.77    1.76
   1  -4  -5   10.20    1.99
  -1   4   5   12.47    1.87
   1  -4  -5    9.19    1.71
   1  -4  -5   11.35    1.64
   1  -4  -5   10.91    1.46
   1  -4  -5    9.91    2.02
  -1   4   5    9.40    1.58
   1  -4  -5   10.35    1.65
   1  -4  -4 1038.25   21.31
   1  -4  -4  924.01   19.22
  -1   4   4  966.12   19.00
  -1   4   4  975.86   19.72
   1  -4  -4 1014.45   21.14
   1  -4  -4  968.16   18.45
   1  -4  -4  947.13   18.86
  -1   4   4  858.45   19.08
  -1   4   4  905.24   18.06
  -1   4   3   98.14    3.79
  -1   4   3   98.71    4.19
   1  -4  -3  105.38    4.08
   1  -4  -3   94.91    4.67
   1  -4  -3   90.89    4.59
   1  -4  -3   96.52    3.79
   1  -4  -3  101.20    3.95
  -1   4   3  107.01    4.41
   1  -4  -3  103.07    4.58
  -1   4   3   92.74    3.49
   1  -4  -3   94.45    4.21
  -1   4   2  316.77    7.92
   1  -4  -2  353.91    7.93
   1  -4  -2  319.38    7.86
   1  -4  -2  349.73    8.01
   1  -4  -2  327.33    7.75
   1  -4  -2  268.68    7.06
  -1   4   2  342.85    8.50
   1  -4  -2  327.08    8.49
  -1   4   2  313.08    7.09
  -1   4   2  341.79    8.61
   1  -4  -2  346.02    8.68
   1  -4  -2  298.58    7.44
  -1   4   1   59.25    2.93
   1  -4  -1   67.45    2.93
  -1   4   1   52.82    1.82
   1  -4  -1   64.64    3.18
   1  -4  -1   55.10    3.11
   1  -4  -1   57.71    3.17
   1  -4  -1   66.56    2.94
   1  -4  -1   64.39    2.92
   1  -4  -1   60.76    2.76
   1  -4  -1   73.83    3.12
   1  -4   0 3672.26   57.44
   1  -4   0 3407.13   57.69
   1  -4   0 3574.67   57.56
   1  -4   0 3392.43   58.09
   1  -4   0 3420.83   57.72
   1  -4   0 3670.50   57.62
   1  -4   0 3334.88   57.05
   1  -4   1    8.71    1.18
   1  -4   1    9.35    1.12
   1  -4   1   10.99    1.44
   1  -4   1    7.69    1.16
   1  -4   1   10.09    1.31
   1  -4   1    7.81    1.28
   1  -4   1    6.96    1.28
   1  -4   1    7.77    1.25
  -1   4  -1    8.34    2.18
   1  -4   2  907.76   17.72
   1  -4   2  964.58   18.35
   1  -4   2  928.78   17.23
   1  -4   2  931.44   18.02
  -1   4  -2  961.79   20.89
   1  -4   2  994.04   18.28
   1  -4   2  927.07   17.51
   1  -4   2 1025.15   18.79
   1  -4   2  877.29   17.30
   1  -4   3  700.72   14.88
   1  -4   3  730.55   15.38
  -1   4  -3  710.02   16.80
   1  -4   3  681.92   14.26
   1  -4   3  707.66   14.36
   1  -4   3  670.28   13.65
   1  -4   4   33.48    2.07
   1  -4   4   43.62    3.15
   1  -4   4   31.78    1.95
   1  -4   4   32.64    2.31
  -1   4  -4   35.02    3.05
   1  -4   4   42.85    3.03
   1  -4   4   38.46    2.78
   1  -4   4   37.80    2.57
   1  -4   4   36.60    2.51
   1  -4   5   43.90    2.91
   1  -4   5   42.86    3.54
  -1   4  -5   41.10    3.16
   1  -4   5   44.52    3.37
   1  -4   5   45.83    3.26
   1  -4   5   41.84    2.96
  -1   4  -6   44.94    3.10
  -1   4  -6   41.70    3.25
   1  -4   6   51.38    3.61
   1  -4   6   51.63    3.61
   1  -4   6   59.90    3.95
   1  -4   6   57.22    4.19
   1  -4   6   50.37    3.93
   1  -4   7 1064.42   23.23
   1  -4   7 1150.84   23.94
   1  -4   7 1145.73   24.36
   1  -4   7 1145.62   23.93
   1  -4   7 1076.23   23.11
   1  -4   8 1791.73   35.13
   1  -4   8 1860.37   34.97
   1  -4   8 1838.97   34.85
   1  -4   9  666.55   15.82
   1  -4   9  664.09   15.84
   1  -4   9  630.17   15.69
   1  -4   9  672.27   16.02
   1  -4  10  180.95    6.06
   1  -4  10  177.30    5.90
   1  -4  10  189.60    5.99
   1  -4  10  184.06    6.18
  -1   3  10   41.25    2.64
  -1   3  10   47.37    2.68
  -1   3   9 1538.42   30.67
   1  -3  -9 1455.34   29.77
  -1   3   8   32.44    2.57
   1  -3  -8   35.77    3.26
   1  -3  -8   33.33    2.97
  -1   3   8   33.33    3.12
   1  -3  -8   36.23    3.27
  -1   3   8   32.55    3.15
  -1   3   8   37.21    2.95
  -1   3   7  198.99    6.93
  -1   3   7  189.72    7.45
   1  -3  -7  189.78    7.78
  -1   3   7  190.69    7.52
   1  -3  -7  191.74    6.96
   1  -3  -7  186.54    7.79
  -1   3   7  173.62    6.47
   1  -3  -7  168.99    5.80
   1  -3  -6 1119.43   24.29
   1  -3  -6 1113.98   24.24
  -1   3   6 1164.32   22.97
   1  -3  -6 1142.15   22.61
  -1   3   6 1215.02   23.91
   1  -3  -6 1048.43   21.38
  -1   3   6 1176.90   22.56
   1  -3  -5 1033.13   21.41
   1  -3  -5 1017.99   21.42
   1  -3  -5 1002.84   19.60
  -1   3   5 1016.64   20.49
  -1   3   5  988.06   19.94
  -1   3   5  983.02   19.25
  -1   3   5 1053.30   20.48
   1  -3  -4 1298.79   25.15
   1  -3  -4 1318.14   25.21
   1  -3  -4 1197.56   21.95
   1  -3  -4 1489.90   24.41
   1  -3  -4 1249.79   23.02
  -1   3   4 1323.06   23.92
  -1   3   4 1343.23   24.32
   1  -3  -4 1283.70   23.53
  -1   3   4 1386.62   24.28
   1  -3  -4 1183.54   23.21
  -1   3   4 1227.07   22.90
  -1   3   3 4283.09   70.31
  -1   3   3 4503.08   71.18
   1  -3  -3 4440.96   71.35
   1  -3  -3 3992.80   69.91
   1  -3  -3 4127.47   69.69
   1  -3  -3 4455.89   71.40
   1  -3  -3 4582.38   70.16
   1  -3  -2  106.72    3.83
   1  -3  -2   99.94    3.40
  -1   3   2   99.04    3.15
  -1   3   2  106.59    3.82
  -1   3   1 4561.74   73.10
   1  -3   0  654.30   12.63
  -1   3   0  596.68   10.40
   1  -3   0  787.14   12.63
   1  -3   0  793.98   12.91
   1  -3   0  732.94   12.28
   1  -3   1 1181.96   20.44
   1  -3   1 1236.22   21.10
   1  -3   1 1194.52   20.69
   1  -3   1 1198.45   21.08
   1  -3   2 1067.46   18.77
   1  -3   2 1105.86   18.94
   1  -3   3  645.31   12.81
   1  -3   3  716.35   14.00
   1  -3   3  749.39   13.99
   1  -3   3  622.24   12.28
  -1   3  -3  681.27   14.95
  -1   3  -3  645.61   13.06
   1  -3   3  653.29   13.04
   1  -3   3  650.35   13.61
   1  -3   3  656.93   11.16
   1  -3   4 9039.08  148.13
   1  -3   4 9657.21  149.88
   1  -3   4 9999.00  150.11
   1  -3   4 9687.29  149.30
   1  -3   4 8822.91  147.67
   1  -3   4 9540.49  148.97
   1  -3   4 9448.44  149.28
   1  -3   5  375.58    8.35
   1  -3   5  416.83   10.77
   1  -3   5  408.08   10.61
   1  -3   5  436.08   10.63
  -1   3  -5  336.04    9.27
   1  -3   5  384.07    9.96
   1  -3   5  345.62    8.95
   1  -3   5  396.26   10.75
   1  -3   6   48.07    3.30
   1  -3   6   53.29    3.70
   1  -3   6   47.86    3.61
  -1   3  -6   42.34    2.84
   1  -3   6   52.58    3.67
   1  -3   6   45.68    2.53
   1  -3   7  657.21   16.62
   1  -3   7  641.37   15.85
   1  -3   7  618.83   15.58
   1  -3   7  653.42   16.26
   1  -3   8  963.37   21.67
  -1   3  -8  997.76   22.85
   1  -3   8  939.22   21.78
  -1   3  -8  947.69   23.64
   1  -3   8  938.36   22.21
   1  -3   9  320.64    9.99
  -1   3  -9  333.47   11.41
   1  -3   9  331.91   10.38
   1  -3   9  338.78   10.00
  -1   3  -9  344.00   10.94
   1  -3   9  336.77   10.79
  -1   3 -10    0.08    1.09
   1  -3  10    0.12    0.81
   1  -3  10    0.33    0.94
   1  -3  10    0.62    0.96
   1  -3  10    1.00    1.00
   1  -3  11   15.97    1.49
  -1   2  11   48.25    2.36
  -1   2  10  545.04   12.68
   1  -2 -10  543.59   13.26
  -1   2   9 1300.87   26.87
  -1   2   9 1211.67   25.18
   1  -2  -9 1209.68   25.33
  -1   2   9 1286.05   25.78
   1  -2  -9 1156.11   25.60
  -1   2   8   83.26    4.65
   1  -2  -8   80.47    4.83
  -1   2   8   87.55    5.18
   1  -2  -8   89.46    5.01
  -1   2   8   86.85    4.82
  -1   2   8   94.77    4.87
   1  -2  -8   86.96    4.82
   1  -2  -8   88.98    5.01
  -1   2   7  510.71   13.77
   1  -2  -7  572.50   14.76
   1  -2  -7  627.78   14.69
  -1   2   7  649.91   14.44
  -1   2   7  587.27   14.61
  -1   2   7  642.10   15.59
  -1   2   7  510.24   12.60
   1  -2  -7  556.16   14.37
   1  -2  -7  571.48   14.73
  -1   2   6  509.74   12.60
   1  -2  -6  521.91   13.46
  -1   2   6  526.14   12.30
   1  -2  -6  526.75   13.52
  -1   2   6  558.55   13.26
   1  -2  -6  569.31   13.37
  -1   2   6  574.95   13.71
  -1   2   6  547.47   12.68
   1  -2  -5   21.45    2.18
   1  -2  -5   23.52    2.14
  -1   2   5   23.28    1.94
  -1   2   5   25.91    2.29
  -1   2   5   20.54    1.87
   1  -2  -5   22.03    2.20
  -1   2   5   22.11    1.84
  -1   2   4  791.15   15.46
   1  -2  -4  823.50   15.56
   1  -2  -4  723.93   13.71
   1  -2  -4  756.95   15.86
  -1   2   4  764.01   14.73
  -1   2   4  768.35   15.95
   1  -2  -4  829.86   16.32
  -1   2   4  788.64   15.22
   1  -2  -4  761.32   15.88
  -1   2   3 4663.20   75.46
  -1   2   2 2628.82   40.48
   1  -2  -2 2333.11   39.62
   1  -2  -1 1889.56   30.75
   1  -2  -1 1858.43   30.79
  -1   2   1 1865.80   30.68
  -1   2   1 1801.59   30.05
   1  -2   0 1443.80   23.83
  -1   2   0 1399.28   23.24
   1  -2   0 1443.45   23.28
  -1   2   0 1391.81   22.67
   1  -2   1  501.11    9.21
   1  -2   1  468.02    8.39
   1  -2   1  472.84    7.86
   1  -2   1  518.97    8.62
   1  -2   2  970.69   16.02
  -1   2  -2 1021.01   16.46
   1  -2   2 1007.87   17.17
  -1   2  -3  608.01   11.14
   1  -2   3  622.52   12.04
   1  -2   3  581.74   10.88
   1  -2   3  605.84   10.84
   1  -2   4   52.87    2.30
   1  -2   4   42.26    2.07
   1  -2   4   50.01    2.82
   1  -2   4   54.13    2.95
   1  -2   4   42.92    2.47
   1  -2   4   49.74    2.86
  -1   2  -4   48.06    2.27
  -1   2  -4   44.39    2.51
   1  -2   4   49.63    2.86
  -1   2  -5   24.10    1.82
  -1   2  -5   23.03    2.87
   1  -2   5   30.01    2.01
  -1   2  -5   19.86    1.56
   1  -2   5   22.25    2.20
   1  -2   5   24.22    2.20
   1  -2   5   24.43    2.27
   1  -2   5   25.02    2.09
   1  -2   5   23.50    2.06
   1  -2   5   20.21    1.64
   1  -2   6 1176.20   24.03
   1  -2   6 1108.23   23.26
   1  -2   6 1116.89   22.85
   1  -2   6 1137.81   23.33
   1  -2   7   70.93    4.45
   1  -2   7   67.26    3.87
   1  -2   7   62.59    4.09
   1  -2   7   68.86    4.35
  -1   2  -8 1144.38   24.52
   1  -2   8 1144.99   23.57
   1  -2   8 1083.06   23.43
   1  -2   9  205.59    7.39
   1  -2   9  212.02    7.70
  -1   2  -9  209.60    8.04
   1  -2  10   27.22    2.33
  -1   2 -10   27.41    2.58
   1  -2  10   26.08    2.18
  -1   2 -11  209.30    5.81
   1  -2  11  231.73    6.40
   1  -1 -11    6.95    1.19
  -1   1  11    5.67    1.09
  -1   1  11    8.31    1.26
  -1   1  10   43.35    3.18
   1  -1 -10   45.89    3.26
  -1   1  10   40.17    2.50
  -1   1   9   58.60    4.06
  -1   1   9   55.72    4.19
  -1   1   9   55.53    3.57
   1  -1  -9   55.79    3.99
   1  -1  -9   63.74    4.27
  -1   1   8  334.24   10.72
  -1   1   8  398.19   11.02
   1  -1  -8  351.33   10.41
   1  -1  -8  361.95   11.04
  -1   1   8  336.35   10.13
   1  -1  -8  372.69   10.55
   1  -1  -8  320.76   10.50
  -1   1   7  385.54   10.50
  -1   1   7  377.35   11.09
  -1   1   7  356.95   10.29
   1  -1  -7  382.34   10.56
   1  -1  -7  383.23   10.79
   1  -1  -7  381.89   10.58
  -1   1   7  343.97   10.62
  -1   1   6  566.43   13.44
   1  -1  -6  596.29   13.60
   1  -1  -6  579.33   13.46
  -1   1   6  568.22   12.90
  -1   1   6  575.00   13.07
  -1   1   6  515.54   11.65
   1  -1  -6  575.01   13.41
   1  -1  -6  502.02   13.01
  -1   1   6  607.29   14.10
  -1   1   5   64.18    3.37
   1  -1  -5   64.49    3.46
  -1   1   5   69.06    3.49
   1  -1  -5   65.20    3.47
  -1   1   5   62.73    3.04
   1  -1  -5   61.00    3.26
   1  -1  -5   55.25    2.09
   1  -1  -5   65.01    3.35
   1  -1  -5   60.48    3.23
  -1   1   5   59.68    3.17
  -1   1   4  138.57    4.54
   1  -1  -4  122.87    3.42
   1  -1  -4  126.33    4.35
  -1   1   4  128.94    4.25
  -1   1   4  143.48    4.80
   1  -1  -4  137.72    4.70
  -1   1   3  140.98    3.98
   1  -1  -3  126.31    3.36
  -1   1   3  137.21    4.11
   1  -1  -3  140.58    4.22
  -1   1   2  677.39   12.19
  -1   1   2  695.81   12.06
   1  -1  -1  591.46   10.75
  -1   1   1  615.92   10.67
   1  -1   0 1633.33   26.41
   1  -1   1  187.57    3.41
   1  -1   1  201.37    3.94
   1  -1   2 2480.51   40.24
  -1   1  -3    8.67    0.93
   1  -1   3    9.81    0.87
  -1   1  -3    9.62    0.85
   1  -1   3   10.45    1.03
   1  -1   3    9.90    1.20
   1  -1   4  430.56    9.25
   1  -1   4  448.66    9.90
  -1   1  -4  406.52    8.07
  -1   1  -4  435.75    9.05
   1  -1   4  445.26    9.45
   1  -1   4  400.31    9.38
   1  -1   4  420.27    9.04
   1  -1   4  457.70    9.93
   1  -1   5  871.54   16.77
   1  -1   5  770.41   17.30
   1  -1   5  891.46   17.07
   1  -1   5  806.98   16.89
   1  -1   5  849.59   16.91
  -1   1  -5  846.88   16.45
  -1   1  -5  852.84   18.87
   1  -1   5  894.75   18.01
   1  -1   5  859.50   17.37
   1  -1   6  245.52    7.91
   1  -1   6  265.21    7.96
  -1   1  -6  254.66    9.02
   1  -1   6  271.72    8.78
   1  -1   6  234.96    7.80
  -1   1  -7   15.51    2.73
   1  -1   7   18.64    2.27
   1  -1   7   21.39    2.80
   1  -1   7   20.60    2.35
  -1   1  -7   18.24    2.46
   1  -1   7   18.24    2.30
   1  -1   8  205.23    7.63
  -1   1  -8  222.76    9.17
   1  -1   8  208.34    7.93
  -1   1  -8  201.53    7.89
   1  -1   8  236.14    9.21
   1  -1   8  223.77    7.92
   1  -1   9   46.72    3.98
   1  -1   9   48.42    3.53
   1  -1   9   39.92    3.40
  -1   1  -9   47.69    3.63
   1  -1   9   47.06    3.27
   1  -1  10    0.79    0.95
  -1   1 -10    0.59    1.06
   1  -1  10    0.96    1.15
   1  -1  11    2.84    0.98
  -1   0  11  286.26    8.23
   1   0 -11  293.54    8.15
   1   0 -10  259.62    8.84
  -1   0  10  265.69    9.09
   1   0  -9    0.51    1.20
   1   0  -9    0.22    1.43
  -1   0   9    0.45    1.21
  -1   0   9    1.96    1.50
  -1   0   9    2.85    1.00
  -1   0   9    0.33    1.08
  -1   0   8   91.14    5.38
   1   0  -8   85.97    5.01
   1   0  -8   93.16    5.27
  -1   0   8   92.13    5.24
  -1   0   8   80.52    4.25
  -1   0   8   99.30    5.11
  -1   0   7   78.82    4.51
   1   0  -7   76.93    4.57
   1   0  -7   75.20    4.06
  -1   0   7   80.38    4.68
   1   0  -7   71.99    3.98
  -1   0   7   93.07    4.54
   1   0  -7   74.91    4.40
  -1   0   7   71.47    3.86
   1   0  -6 6553.00  114.73
  -1   0   6 6611.97  112.90
  -1   0   6 7184.23  113.77
  -1   0   6 7279.96  114.11
   1   0  -6 7346.89  114.15
   1   0  -6 7183.47  114.87
  -1   0   6 6953.57  115.38
   1   0  -6 7163.15  115.47
   1   0  -6 7350.58  114.19
  -1   0   5  232.88    6.54
   1   0  -5  226.64    6.95
   1   0  -5  222.65    5.39
   1   0  -5  215.32    6.40
  -1   0   5  215.43    6.46
   1   0  -5  229.97    6.83
   1   0  -5  215.39    6.43
   1   0  -5  234.28    7.00
   1   0  -4 1237.50   21.99
   1   0  -4 1179.48   20.59
   1   0  -3 3351.33   53.65
  -1   0   3 3502.01   53.64
  -1   0   2  294.99    5.88
  -1   0   2  302.68    5.99
   1   0  -2  269.80    5.62
   1   0  -2  281.58    5.98
   1   0  -2  261.65    5.45
   1   0  -1  428.38    7.06
  -1   0   1  423.17    7.81
  -1   0   1  435.58    7.56
   1   0   0   20.02    0.83
   1   0   0   22.34    0.65
   1   0   3  120.87    3.51
  -1   0  -3  133.29    3.59
  -1   0  -3  126.46    4.41
  -1   0  -4 1444.34   25.26
   1   0   4 1389.93   25.83
  -1   0  -4 1461.31   26.97
   1   0   4 1496.38   26.45
   1   0   4 1559.61   25.69
   1   0   4 1395.56   25.85
  -1   0  -5 2576.26   43.92
   1   0   5 2397.35   42.22
   1   0   5 2581.55   42.61
   1   0   5 2421.80   42.13
   1   0   5 2709.83   43.48
   1   0   5 2479.53   42.42
   1   0   5 2318.53   41.39
  -1   0  -5 2394.79   41.64
  -1   0  -5 2371.63   42.19
   1   0   6  816.72   17.04
   1   0   6  833.89   18.22
  -1   0  -6  790.95   16.78
   1   0   6  861.77   17.89
  -1   0  -6  807.96   18.61
   1   0   6  806.58   17.36
  -1   0  -6  760.03   17.09
   1   0   6  761.81   16.21
   1   0   7  884.06   18.99
   1   0   7  922.35   19.98
  -1   0  -7 1006.34   22.27
   1   0   7  979.97   21.77
   1   0   7  959.61   20.92
  -1   0  -7  947.36   20.35
   1   0   7  962.57   20.55
   1   0   7 1008.13   21.37
   1   0   8  861.97   19.93
   1   0   8  881.41   19.61
   1   0   8  863.00   20.31
   1   0   8  866.29   19.02
  -1   0  -8  745.74   18.18
   1   0   8  806.64   17.99
  -1   0  -8  796.41   20.09
   1   0   9   23.19    2.48
   1   0   9   22.01    2.73
   1   0   9   18.67    2.53
  -1   0  -9   17.11    2.23
   1   0   9   22.81    2.66
   1   0   9   21.49    2.13
  -1   0  -9   14.62    2.41
   1   0  10  128.41    5.55
   1   0  10  139.57    5.62
   1   0  10  128.69    4.91
   1   0  11  135.72    4.71
   1   0  11  174.20    5.29
  -1  -1  11    2.03    1.02
  -1  -1  11    1.87    0.99
   1   1 -11    1.72    1.07
  -1  -1  10   38.25    3.39
   1   1 -10   39.67    3.44
  -1  -1  10   42.97    3.32
  -1  -1   9   47.64    3.73
  -1  -1   9   42.87    3.92
   1   1  -9   38.28    3.43
   1   1  -9   46.12    3.87
  -1  -1   9   46.89    3.69
  -1  -1   8   35.22    3.17
   1   1  -8   30.00    3.13
  -1  -1   8   35.89    3.55
   1   1  -8   38.82    3.56
  -1  -1   8   34.82    3.13
   1   1  -7    3.41    1.55
  -1  -1   7    5.22    1.70
  -1  -1   7    4.32    1.13
  -1  -1   7    4.70    1.24
  -1  -1   7    4.87    1.08
  -1  -1   7    4.67    1.34
  -1  -1   7    3.84    1.30
   1   1  -7    5.13    1.69
  -1  -1   6    8.45    1.31
   1   1  -6    9.85    1.35
   1   1  -6   11.04    1.20
  -1  -1   6   12.45    1.70
   1   1  -6    9.99    1.62
  -1  -1   6   14.89    2.06
  -1  -1   6   10.15    1.56
  -1  -1   6   10.59    1.32
  -1  -1   6    9.91    1.31
   1   1  -6   17.58    2.21
   1   1  -6   15.04    2.12
   1   1  -6    7.98    1.33
   1   1  -6    9.47    1.39
  -1  -1   5  488.86   11.09
   1   1  -5  445.93    9.64
   1   1  -5  423.38    9.78
  -1  -1   5  468.89   10.27
   1   1  -5  424.18    9.82
  -1  -1   5  399.89    9.44
  -1  -1   5  443.84   10.08
  -1  -1   5  387.62    9.13
   1   1  -5  387.86   10.21
   1   1  -5  417.98    9.08
  -1  -1   4   60.43    2.67
   1   1  -4   51.80    2.95
  -1  -1   4   53.67    2.56
   1   1  -4   55.38    2.85
  -1  -1   4   68.04    3.08
   1   1  -4   58.00    2.48
  -1  -1   4   65.06    3.01
   1   1  -3  197.67    4.82
   1   1  -3  169.28    5.11
  -1  -1  -1 1188.86   20.18
  -1  -1  -1 1137.48   19.78
  -1  -1  -2  672.62   12.65
  -1  -1  -2  705.02   12.73
   1   1   2  683.48   12.61
   1   1   2  678.93   12.67
   1   1   4  141.70    4.71
   1   1   4  139.66    4.49
   1   1   4  149.02    4.99
  -1  -1  -4  157.08    4.97
   1   1   4  163.70    5.10
   1   1   4  147.94    4.93
   1   1   4  156.17    5.06
  -1  -1  -4  148.22    5.27
   1   1   4  146.12    4.84
   1   1   5  457.23   10.66
  -1  -1  -5  439.37   10.52
  -1  -1  -5  441.89   10.96
   1   1   5  510.81   11.39
   1   1   5  477.03   11.31
   1   1   5  493.65   11.65
   1   1   5  448.04   10.64
   1   1   5  466.17   11.08
   1   1   5  442.77   11.30
   1   1   6  701.89   15.71
   1   1   6  868.07   17.32
   1   1   6  767.61   16.30
  -1  -1  -6  723.76   16.23
  -1  -1  -6  806.25   18.10
   1   1   6  824.57   17.46
   1   1   6  757.39   17.52
   1   1   6  823.85   16.96
   1   1   7    1.18    1.02
   1   1   7    0.58    0.97
  -1  -1  -7    0.20    1.06
   1   1   7    0.77    1.24
   1   1   7   -0.10    1.14
  -1  -1  -7    0.05    1.35
   1   1   8  299.16    9.80
  -1  -1  -8  270.70    9.68
   1   1   8  266.43    8.59
  -1  -1  -8  251.11    8.41
   1   1   8  310.38    9.41
   1   1   8  312.68    9.86
   1   1   8  285.68    8.39
   1   1   9  883.27   18.48
  -1  -1  -9  711.57   18.04
   1   1   9  789.90   17.90
  -1  -1  -9  651.80   15.79
   1   1   9  832.12   17.51
   1   1   9  783.04   18.70
   1   1  10  281.47    8.35
  -1  -1 -10  296.61    8.07
   1   1  11  522.02   11.05
   1   2 -11  123.59    5.05
  -1  -2  11  118.66    4.95
  -1  -2  11  128.08    4.92
   1   2 -10  992.37   21.88
  -1  -2  10 1037.28   21.63
  -1  -2  10  977.02   22.01
  -1  -2   9  198.80    8.40
   1   2  -9  205.31    8.18
  -1  -2   9  198.59    7.69
  -1  -2   8  236.86    8.01
  -1  -2   8  247.15    7.86
   1   2  -8  287.36    9.90
  -1  -2   8  292.42    9.30
   1   2  -8  231.36    9.22
   1   2  -7   26.35    3.01
   1   2  -7   23.86    2.24
  -1  -2   7   25.16    2.28
   1   2  -7   23.53    2.97
  -1  -2   7   25.53    2.38
  -1  -2   7   29.30    2.59
  -1  -2   7   27.87    2.73
   1   2  -6  171.25    5.57
   1   2  -6  175.44    5.86
  -1  -2   6  193.43    6.66
  -1  -2   6  167.50    6.06
  -1  -2   6  175.90    6.16
   1   2  -6  183.66    5.94
   1   2  -6  174.36    5.99
   1   2  -5 3175.48   53.80
  -1  -2   5 3039.80   54.04
   1   2  -5 3232.28   53.98
   1   2  -5 3176.05   53.77
   1   2  -5 3048.46   55.26
   1   2  -5 3133.69   54.50
  -1  -2   5 3603.76   55.69
  -1  -2   5 3548.70   54.21
  -1  -2   5 3084.30   53.86
  -1  -2   5 3361.74   54.54
  -1  -2   5 3375.06   54.75
  -1  -2   4 1431.79   22.58
  -1  -2   4 1147.81   22.53
   1   2  -4 1213.01   23.46
   1   2  -4 1204.59   22.92
  -1  -2   4 1245.68   22.74
  -1  -2   4 1286.08   22.85
  -1  -2   4 1417.60   23.67
   1   2  -4 1195.67   22.58
  -1  -2   4 1276.32   23.21
  -1  -2   3  332.57    6.98
   1   2  -3  322.40    7.55
   1   2  -2 2559.76   43.87
  -1  -2   2 2691.06   42.59
  -1  -2   0  173.79    4.80
  -1  -2   0  175.23    4.41
  -1  -2   0  165.78    3.51
   1   2   0  172.32    4.29
  -1  -2  -1 2663.18   43.05
   1   2   1 2611.71   42.22
  -1  -2  -1 2700.79   42.13
  -1  -2  -2  954.25   17.08
   1   2   2  953.73   17.34
   1   2   2  974.11   15.99
  -1  -2  -2  956.90   17.79
   1   2   3 1801.22   32.88
   1   2   3 2036.53   33.32
   1   2   3 1988.33   33.68
   1   2   3 2035.62   33.44
   1   2   3 1790.18   32.86
  -1  -2  -3 1986.36   33.61
  -1  -2  -3 1947.02   33.12
   1   2   4  354.42    8.65
   1   2   4  366.59    9.06
  -1  -2  -4  401.05    9.39
  -1  -2  -4  403.53    9.41
   1   2   4  402.46    9.50
   1   2   4  370.96    9.46
  -1  -2  -4  398.26    9.51
  -1  -2  -4  385.22    9.71
   1   2   4  426.98    9.88
   1   2   4  387.95    9.34
   1   2   4  404.42    9.64
   1   2   5 4695.54   75.66
   1   2   5 4550.78   74.06
   1   2   5 4763.53   75.45
   1   2   5 3969.32   74.91
  -1  -2  -5 4700.18   74.89
   1   2   5 4576.72   75.34
  -1  -2  -5 4099.28   73.68
   1   2   5 4723.70   75.26
  -1  -2  -5 4459.69   76.07
  -1  -2  -5 4634.07   75.48
  -1  -2  -5 4708.04   74.84
   1   2   5 4804.89   76.07
  -1  -2  -6  189.69    6.43
   1   2   6  217.29    7.55
   1   2   6  228.37    7.46
   1   2   6  226.12    7.56
   1   2   6  193.73    7.00
   1   2   6  229.35    7.93
   1   2   6  199.68    7.00
   1   2   6  211.53    6.64
  -1  -2  -6  210.83    7.54
  -1  -2  -7  146.52    5.68
   1   2   7  177.63    6.92
  -1  -2  -7  174.70    7.27
   1   2   7  189.06    6.29
   1   2   7  195.59    7.11
   1   2   7  187.69    7.60
   1   2   7  201.29    7.44
   1   2   7  140.62    5.98
   1   2   7  178.08    7.12
   1   2   8  724.87   17.21
   1   2   8  692.71   16.57
  -1  -2  -8  673.40   17.32
   1   2   8  736.48   18.17
   1   2   9   42.63    3.36
   1   2   9   37.35    2.89
   1   2   9   35.22    2.74
  -1  -2  -9   35.70    2.95
   1   2  10  110.47    4.06
  -1  -2 -10  121.17    4.21
  -1  -3  11  221.90    6.82
  -1  -3  11  240.73    6.92
   1   3 -11  245.09    7.23
  -1  -3  10    0.91    1.22
   1   3 -10   -0.05    1.33
  -1  -3  10    0.82    1.08
  -1  -3   9  235.30    7.91
   1   3  -9  250.97    9.04
  -1  -3   9  287.24    9.39
   1   3  -9  281.50    9.86
  -1  -3   9  239.30    9.18
   1   3  -8   35.98    2.88
  -1  -3   8   37.74    3.70
  -1  -3   8   32.64    2.95
  -1  -3   8   42.21    3.50
  -1  -3   8   35.83    2.88
  -1  -3   7   36.00    3.38
  -1  -3   7   31.65    2.50
  -1  -3   7   31.47    2.88
   1   3  -7   30.48    2.46
  -1  -3   7   39.02    3.26
   1   3  -7   32.72    2.85
   1   3  -7   28.38    3.32
  -1  -3   6  122.20    5.32
  -1  -3   6  142.16    6.12
   1   3  -6  128.62    5.47
  -1  -3   6  136.10    5.64
  -1  -3   6  125.72    4.65
  -1  -3   6  140.72    5.70
   1   3  -6  121.84    5.10
  -1  -3   6  127.34    5.36
  -1  -3   5  320.67    9.20
  -1  -3   5  311.43    8.52
   1   3  -5  252.34    8.79
   1   3  -5  292.21    9.22
   1   3  -5  276.69    7.75
  -1  -3   5  313.71    7.55
   1   3  -5  355.35    8.90
  -1  -3   5  317.55    8.74
  -1  -3   5  337.67    8.81
  -1  -3   5  341.97    8.68
   1   3  -5  279.44    7.80
  -1  -3   4   59.64    3.11
  -1  -3   4   65.69    3.28
  -1  -3   4   64.92    3.12
   1   3  -4   49.92    2.74
  -1  -3   4   67.21    3.00
  -1  -3   4   66.76    3.10
   1   3  -4   56.76    3.43
  -1  -3   4   60.32    3.05
   1   3  -4   64.23    3.40
   1   3  -4   51.78    2.79
  -1  -3   3 1692.09   27.87
  -1  -3   3 1449.88   27.31
   1   3  -3 1612.27   28.85
   1   3  -3 1359.76   27.21
   1   3  -3 1642.34   28.34
  -1  -3   3 1481.69   27.19
   1   3  -3 1355.60   27.25
  -1  -3   3 1650.37   27.14
  -1  -3   3 1548.82   28.04
  -1  -3   3 1601.39   27.14
  -1  -3   3 1747.89   26.18
   1   3  -2    2.53    1.12
  -1  -3   2    3.07    0.79
   1   3  -2    2.04    1.06
  -1  -3   2    3.32    0.94
  -1  -3   2    2.48    0.74
   1   3   0   63.26    2.85
  -1  -3   0   64.23    2.85
  -1  -3   0   59.33    2.12
  -1  -3   0   59.62    3.36
  -1  -3  -1  130.10    4.49
   1   3   1  120.10    4.00
  -1  -3  -1  129.81    3.57
   1   3   1  114.66    3.50
  -1  -3  -1  143.45    4.26
  -1  -3  -1  114.10    4.79
   1   3   2  662.91   12.73
  -1  -3  -2  662.15   13.79
   1   3   2  616.62   12.39
   1   3   2  694.13   12.19
   1   3   2  675.91   13.35
  -1  -3  -2  598.60   13.26
   1   3   2  581.16   12.52
  -1  -3  -2  598.44   13.25
   1   3   2  621.84   13.07
   1   3   2  651.49   13.09
  -1  -3  -3 1310.10   21.31
   1   3   3 1202.49   21.16
   1   3   3 1205.68   21.08
   1   3   3 1278.58   21.39
  -1  -3  -3 1123.41   21.58
  -1  -3  -3 1297.26   22.52
   1   3   3 1165.07   21.51
   1   3   3  976.40   18.09
   1   3   3 1118.50   20.36
  -1  -3  -3 1104.47   21.54
   1   3   4 1732.16   30.06
   1   3   4 1645.02   30.05
  -1  -3  -4 1673.53   31.51
  -1  -3  -4 1870.52   32.45
  -1  -3  -4 1670.09   31.53
   1   3   4 1818.21   31.24
   1   3   4 1808.61   31.61
   1   3   4 1816.47   31.87
  -1  -3  -4 1868.76   31.23
   1   3   4 1792.40   31.86
   1   3   5  408.13   10.86
   1   3   5  403.22   10.75
   1   3   5  330.52    9.02
   1   3   5  397.26   10.30
  -1  -3  -5  366.02   10.27
  -1  -3  -5  397.99   10.37
  -1  -3  -5  364.94   10.23
   1   3   5  364.86    9.29
  -1  -3  -6  133.41    5.64
  -1  -3  -6  100.23    5.30
   1   3   6  123.81    5.89
   1   3   6  105.53    4.77
  -1  -3  -6  137.19    5.70
   1   3   6  121.60    5.94
   1   3   6  118.65    5.69
   1   3   6  119.73    4.82
  -1  -3  -6  122.00    5.63
   1   3   6  140.31    5.86
   1   3   7  331.80    9.71
   1   3   7  390.29   10.67
   1   3   7  377.17   11.56
   1   3   7  340.10   10.44
  -1  -3  -7  360.86   10.97
   1   3   7  374.82   11.62
  -1  -3  -7  329.48   10.60
   1   3   7  388.01   10.70
   1   3   7  425.54   11.68
   1   3   8   33.28    2.97
   1   3   8   28.86    2.94
   1   3   8   22.46    2.14
  -1  -3  -8   24.13    2.69
   1   3   8   20.16    2.17
   1   3   8   27.30    2.85
   1   3   9  605.79   14.35
  -1  -3  -9  551.44   13.21
  -1  -4  10   48.34    3.27
  -1  -4  10   44.89    3.14
  -1  -4   9  413.23   11.40
  -1  -4   9  423.36   12.38
  -1  -4   8  369.91   11.10
  -1  -4   8  385.14   11.76
   1   4  -8  355.88   11.66
  -1  -4   8  344.24   10.20
   1   4  -8  350.32   11.91
   1   4  -8  358.76   10.49
  -1  -4   7  451.67   12.23
  -1  -4   7  457.39   12.72
   1   4  -7  450.84   12.52
   1   4  -7  419.65   11.74
  -1  -4   7  416.97   12.54
   1   4  -6   27.20    2.63
  -1  -4   6   32.14    2.94
  -1  -4   6   28.86    2.83
  -1  -4   6   27.88    2.72
   1   4  -6   31.17    3.00
  -1  -4   6   30.34    2.91
  -1  -4   5    4.16    1.37
  -1  -4   5    3.52    1.21
   1   4  -5    5.06    1.13
  -1  -4   5    3.79    1.20
   1   4  -5    3.12    1.41
  -1  -4   5    3.39    1.20
  -1  -4   5    4.21    1.33
   1   4  -5    3.67    1.37
   1   4  -5    3.98    1.06
  -1  -4   4  662.07   14.49
   1   4  -4  582.39   13.07
  -1  -4   4  603.41   13.48
   1   4  -4  580.94   13.56
   1   4  -4  610.14   13.75
   1   4  -4  586.22   15.33
   1   4  -4  653.54   14.75
  -1  -4   4  638.60   14.17
  -1  -4   4  694.86   14.06
  -1  -4   4  683.35   13.79
  -1  -4   3 2142.04   37.38
   1   4  -3 2291.38   39.48
  -1  -4   3 2180.17   37.17
   1   4  -3 2167.84   38.40
   1   4  -3 2178.66   38.44
  -1  -4   3 2171.75   38.24
   1   4  -3 2098.09   37.65
  -1  -4   3 2172.94   37.50
  -1  -4   2  390.35    8.90
  -1  -4   2  367.95    8.16
  -1  -4   2  331.98    8.29
  -1  -4   2  389.97    9.32
   1   4  -2  378.44    9.68
  -1  -4   2  326.17    7.83
   1   4  -2  343.01    8.71
   1   4  -2  312.37    8.70
  -1  -4   2  346.56    8.58
   1   4  -2  313.27    8.74
   1   4  -1  280.08    7.94
  -1  -4   1  295.51    6.75
  -1  -4   1  248.54    5.60
  -1  -4   1  297.08    8.31
   1   4  -1  290.77    8.18
   1   4  -1  275.05    7.64
  -1  -4   1  316.98    7.56
  -1  -4   1  273.16    6.91
   1   4  -1  280.19    7.94
   1   4   0 1435.20   26.99
  -1  -4   0 1523.50   25.89
  -1  -4   0 1320.60   24.90
  -1  -4   0 1462.19   25.12
   1   4   0 1431.47   27.04
   1   4   0 1447.07   25.66
   1   4   0 1490.08   26.84
   1   4   0 1399.79   26.43
  -1  -4   0 1574.30   26.04
   1   4   0 1410.86   25.39
  -1  -4  -1   10.26    1.32
   1   4   1    8.69    1.40
   1   4   1    8.14    1.54
   1   4   1    8.25    1.50
  -1  -4  -1   10.03    1.54
   1   4   1    9.60    1.35
   1   4   1    8.22    0.96
  -1  -4  -1   10.89    1.43
   1   4   1   11.07    1.41
  -1  -4  -1   10.12    1.24
  -1  -4  -2  288.27    7.64
   1   4   2  292.06    7.99
  -1  -4  -2  306.53    8.88
   1   4   2  290.61    8.06
   1   4   2  293.97    8.12
   1   4   2  289.06    7.25
  -1  -4  -2  282.64    7.11
   1   4   2  267.46    7.13
   1   4   3 2091.30   36.95
  -1  -4  -3 2077.33   35.54
   1   4   3 2046.14   36.66
  -1  -4  -3 2057.90   36.24
   1   4   3 2069.08   36.29
   1   4   3 1991.30   35.54
   1   4   3 2020.05   35.89
   1   4   4  966.31   19.94
  -1  -4  -4 1022.77   19.65
   1   4   4 1004.90   20.02
  -1  -4  -4  946.55   20.48
   1   4   4  988.29   19.68
   1   4   4 1005.91   20.74
   1   4   5  391.22   11.30
   1   4   5  384.88   10.76
  -1  -4  -5  372.09   10.83
   1   4   5  397.30   11.31
   1   4   5  376.51   10.74
  -1  -4  -5  382.19   10.32
  -1  -4  -6  364.67   10.97
   1   4   6  372.07   11.40
   1   4   6  376.25   11.42
   1   4   6  377.86   11.52
   1   4   6  341.45   10.90
  -1  -4  -6  358.48   10.43
   1   4   7  286.84    9.78
   1   4   7  335.88   10.12
  -1  -4  -7  307.48    9.77
  -1  -4  -7  295.95    9.49
   1   4   7  350.62   10.32
   1   4   7  290.40    9.93
   1   4   7  336.87   10.22
   1   4   8  470.04   12.26
   1   4   8  495.38   12.12
  -1  -4  -9  396.60    9.19
   1   4   9  454.66   10.76
   1   5 -10  139.44    5.19
  -1  -5  10  113.00    4.12
   1   5  -9    0.32    0.96
  -1  -5   9    1.02    1.09
  -1  -5   9    0.48    0.94
   1   5  -9    1.58    1.43
  -1  -5   8  168.29    6.65
  -1  -5   8  165.40    6.95
   1   5  -8  170.05    7.54
  -1  -5   8  146.95    6.16
   1   5  -8  162.55    6.58
  -1  -5   7 3097.89   54.19
   1   5  -7 3111.42   54.01
  -1  -5   7 2984.85   53.13
   1   5  -7 2927.77   52.99
  -1  -5   7 2817.98   52.40
  -1  -5   6    3.16    1.28
   1   5  -6    2.99    1.79
  -1  -5   6    3.48    1.69
  -1  -5   6    2.90    1.46
   1   5  -6    3.45    1.82
   1   5  -6    5.75    1.66
  -1  -5   6    3.03    1.48
  -1  -5   5   78.61    4.68
   1   5  -5   70.63    3.86
  -1  -5   5   75.74    3.98
   1   5  -5   69.38    3.80
  -1  -5   5   81.07    4.14
   1   5  -5   81.69    4.74
  -1  -5   5   69.99    4.40
  -1  -5   5   80.02    4.40
  -1  -5   4    7.23    1.64
  -1  -5   4    5.74    1.29
   1   5  -4    3.94    1.19
  -1  -5   4    6.24    1.56
   1   5  -4    5.68    1.32
  -1  -5   4    7.10    1.22
   1   5  -4    5.29    1.34
  -1  -5   4    5.37    1.30
   1   5  -4    4.74    1.67
   1   5  -4    5.74    1.62
  -1  -5   3  416.41   11.08
   1   5  -3  412.68   10.74
  -1  -5   3  427.38   10.33
  -1  -5   3  424.52   11.21
  -1  -5   3  410.77   10.11
   1   5  -3  413.05   11.16
   1   5  -3  413.65   11.12
  -1  -5   2 1039.35   21.20
   1   5  -2 1127.59   22.54
   1   5  -2 1112.11   22.41
   1   5  -2 1128.07   22.18
  -1  -5   2 1124.13   20.98
  -1  -5   2 1123.55   21.80
  -1  -5   2 1142.18   21.27
  -1  -5   2 1129.72   22.54
  -1  -5   1 2313.10   40.00
  -1  -5   1 2430.11   40.98
   1   5  -1 2125.50   39.87
   1   5  -1 2385.48   42.41
  -1  -5   1 2385.25   41.16
  -1  -5   1 2349.25   40.64
   1   5  -1 2254.43   41.58
   1   5  -1 2339.11   42.45
   1   5  -1 2381.68   42.33
  -1  -5   1 2346.32   40.51
  -1  -5   1 2592.99   42.74
  -1  -5   0 1129.24   21.95
  -1  -5   0 1162.79   21.36
  -1  -5   0 1051.41   21.32
   1   5   0 1194.97   23.25
   1   5   0 1143.52   22.93
  -1  -5   0 1227.53   22.37
   1   5   0 1087.00   21.31
  -1  -5   0 1256.65   23.78
   1   5   0 1193.88   23.87
  -1  -5   0 1088.36   21.56
   1   5   0 1178.18   23.73
   1   5   0 1103.88   21.79
  -1  -5  -1   10.92    1.48
   1   5   1   12.49    1.74
   1   5   1   11.63    1.98
  -1  -5  -1   14.05    1.76
  -1  -5  -1   12.56    1.58
   1   5   1   11.55    1.94
   1   5   1   11.19    1.64
   1   5   1   11.95    1.56
  -1  -5  -1   11.76    1.45
  -1  -5  -2  124.39    4.85
   1   5   2  122.49    4.69
   1   5   2  123.63    5.37
   1   5   2  132.89    5.60
   1   5   2  130.90    5.33
  -1  -5  -2  126.24    4.78
  -1  -5  -2  122.80    4.98
   1   5   2  109.09    3.89
  -1  -5  -3    3.45    1.09
   1   5   3    4.17    1.57
  -1  -5  -3    5.55    1.46
   1   5   3    2.65    1.46
   1   5   3    3.29    0.96
   1   5   3    5.58    1.43
   1   5   3    4.25    1.47
   1   5   3    2.94    1.35
  -1  -5  -3    2.00    1.07
  -1  -5  -4  317.46    8.77
   1   5   4  346.15   11.20
   1   5   4  308.81    9.35
   1   5   4  348.12   11.12
   1   5   4  326.22   10.04
  -1  -5  -4  317.34    8.97
  -1  -5  -4  331.39    9.72
   1   5   4  316.97   10.22
   1   5   4  284.89    8.59
  -1  -5  -4  274.14    9.09
   1   5   5  379.29   10.80
  -1  -5  -5  382.43   10.14
  -1  -5  -5  399.68   10.90
   1   5   5  376.71   10.28
  -1  -5  -5  440.41   11.77
   1   5   5  436.51   12.88
   1   5   5  450.81   13.10
   1   5   5  444.80   12.53
   1   5   6    2.06    1.60
  -1  -5  -6    1.44    1.12
   1   5   6    1.98    1.07
   1   5   6    3.00    1.45
  -1  -5  -6    4.47    1.58
   1   5   6    3.43    1.54
   1   5   6    1.60    1.40
   1   5   7    2.40    1.44
   1   5   7    2.04    1.23
  -1  -5  -7    2.91    1.27
   1   5   7    1.72    1.14
  -1  -5  -7    1.15    1.15
   1   5   7    0.93    1.05
  -1  -5  -8  123.72    5.02
   1   5   8  108.04    4.68
  -1  -5  -8  114.44    4.36
  -1  -5  -9    9.54    1.18
   1   5   9    9.79    1.29
   1   6  -9   51.40    2.83
   1   6  -9   56.94    3.46
  -1  -6   9   49.31    3.04
   1   6  -8  144.97    6.43
  -1  -6   8  137.31    6.12
   1   6  -8  143.35    6.00
  -1  -6   8  133.33    5.47
   1   6  -7   88.69    5.06
   1   6  -7  102.10    5.52
  -1  -6   7   95.04    5.39
  -1  -6   7   95.65    5.14
  -1  -6   6 1397.24   28.82
   1   6  -6 1426.14   28.62
  -1  -6   6 1442.97   27.39
  -1  -6   6 1409.38   28.22
   1   6  -5   76.76    5.05
   1   6  -5   61.27    3.70
  -1  -6   5   67.13    4.72
   1   6  -5   62.24    4.54
  -1  -6   5   68.22    4.52
  -1  -6   5   64.26    4.06
   1   6  -5   62.41    3.74
   1   6  -4    0.58    1.07
   1   6  -4    0.77    1.39
   1   6  -4    0.17    1.61
   1   6  -4    0.68    1.07
  -1  -6   4   -0.05    1.22
   1   6  -4    0.09    1.10
  -1  -6   4    0.57    0.92
  -1  -6   4    0.04    1.08
  -1  -6   4    0.26    1.30
  -1  -6   4    0.61    1.02
   1   6  -3  314.51   10.47
  -1  -6   3  318.21    9.09
  -1  -6   3  335.89    9.72
  -1  -6   3  353.55   10.50
  -1  -6   3  324.06    9.27
   1   6  -3  330.78   10.05
   1   6  -3  325.56   10.27
   1   6  -3  325.90   10.22
   1   6  -2   22.31    2.58
  -1  -6   2   23.55    2.26
   1   6  -2   22.98    2.61
  -1  -6   2   20.30    2.12
  -1  -6   2   21.82    2.49
   1   6  -2   22.97    2.57
  -1  -6   1  371.67   10.03
   1   6  -1  392.90   11.69
  -1  -6   1  381.22   10.29
  -1  -6   1  417.69   11.00
   1   6  -1  405.11   11.89
  -1  -6   1  385.73   10.68
   1   6  -1  380.09    9.88
   1   6  -1  407.56   11.98
   1   6  -1  402.57   11.44
  -1  -6   0    9.26    1.59
   1   6   0    8.93    1.98
   1   6   0   11.26    1.69
  -1  -6   0    9.63    1.78
   1   6   0   12.06    2.17
   1   6   0   11.79    1.98
  -1  -6   0    9.75    1.48
  -1  -6   0   13.11    1.75
   1   6   0    9.62    1.96
  -1  -6  -1  403.56   10.65
   1   6   1  445.01   13.08
   1   6   1  445.82   13.13
   1   6   1  423.86   11.40
  -1  -6  -1  398.13   10.72
   1   6   1  415.90   11.36
  -1  -6  -1  424.25   10.61
   1   6   1  403.55   10.60
  -1  -6  -2 1901.78   35.60
   1   6   2 2159.75   37.97
   1   6   2 2176.73   39.96
   1   6   2 1823.97   35.20
   1   6   2 1926.99   36.73
  -1  -6  -2 1961.85   36.17
   1   6   2 2074.32   38.05
  -1  -6  -2 1948.96   35.71
   1   6   2 2217.15   39.99
  -1  -6  -3  659.78   14.89
  -1  -6  -3  666.70   15.78
  -1  -6  -3  683.84   15.44
   1   6   3  706.63   17.18
  -1  -6  -3  700.88   16.27
   1   6   3  688.73   16.71
   1   6   3  688.82   16.56
  -1  -6  -4  211.49    6.84
  -1  -6  -4  227.04    7.66
   1   6   4  264.78    9.83
   1   6   4  221.00    7.93
  -1  -6  -4  240.84    8.17
  -1  -6  -4  223.04    7.93
   1   6   4  239.98    8.89
   1   6   4  258.74    9.81
   1   6   4  217.95    8.33
  -1  -6  -5  535.26   13.10
  -1  -6  -5  540.50   13.45
   1   6   5  585.74   15.49
  -1  -6  -5  532.16   13.52
   1   6   5  486.15   12.35
  -1  -6  -5  466.28   11.32
   1   6   5  595.40   15.68
   1   6   5  517.67   14.09
   1   6   6  127.27    6.04
   1   6   6  127.22    6.07
  -1  -6  -6  119.59    5.24
   1   6   6  116.20    5.91
  -1  -6  -6  113.82    5.21
   1   6   6  120.01    5.81
   1   6   7    6.25    1.58
  -1  -6  -7    7.10    1.33
  -1  -6  -7    6.92    1.30
   1   6   7    6.92    1.38
   1   6   7    7.53    1.39
   1   6   8   17.25    1.63
  -1  -6  -8   21.93    1.64
   1   6   8   21.03    1.85
  -1  -7   8   86.63    4.29
   1   7  -8   99.05    4.34
   1   7  -8  101.28    4.41
  -1  -7   8   79.53    3.93
  -1  -7   7   60.26    4.09
   1   7  -7   65.14    4.04
  -1  -7   7   62.80    3.89
  -1  -7   7   59.02    3.77
   1   7  -7   71.91    4.31
  -1  -7   6  113.40    5.57
  -1  -7   6  126.81    6.01
   1   7  -6  128.82    6.35
  -1  -7   6  122.05    6.10
  -1  -7   5  111.18    6.00
  -1  -7   5  105.67    5.63
   1   7  -5  105.23    5.90
  -1  -7   5  102.15    4.86
  -1  -7   5   95.79    5.14
   1   7  -4   37.42    3.13
   1   7  -4   36.74    3.11
   1   7  -4   36.58    3.11
  -1  -7   4   40.70    3.71
   1   7  -4   41.71    3.80
  -1  -7   4   38.15    3.46
  -1  -7   4   34.78    2.77
  -1  -7   4   34.52    3.14
   1   7  -3  494.41   13.45
  -1  -7   3  496.30   13.76
   1   7  -3  493.42   14.15
   1   7  -3  517.86   13.89
   1   7  -3  520.65   13.84
  -1  -7   2   10.77    2.21
  -1  -7   2   10.96    2.02
   1   7  -2    9.26    1.97
  -1  -7   2   10.20    1.77
   1   7  -2   11.20    2.26
   1   7  -2   11.59    2.14
   1   7  -2   11.17    2.27
   1   7  -2   10.72    2.12
  -1  -7   1  441.70   12.27
   1   7  -1  444.56   12.48
  -1  -7   1  470.25   12.91
   1   7  -1  444.03   13.37
  -1  -7   1  440.04   11.58
  -1  -7   1  425.03   11.67
   1   7  -1  454.14   13.29
   1   7  -1  455.31   13.42
  -1  -7   0  157.00    6.37
   1   7   0  162.60    7.59
  -1  -7   0  154.11    6.00
  -1  -7   0  164.54    6.95
   1   7   0  154.09    6.32
   1   7   0  166.25    7.01
  -1  -7   0  154.68    6.13
   1   7   0  165.85    6.48
   1   7   0  178.16    7.53
   1   7   0  162.03    7.60
  -1  -7  -1   14.71    1.95
   1   7   1   14.57    2.03
  -1  -7  -1   15.16    2.02
  -1  -7  -1   14.35    1.87
   1   7   1   15.15    2.57
   1   7   1   14.52    2.17
   1   7   1   17.05    2.75
  -1  -7  -2   60.80    3.65
   1   7   2   69.61    5.08
   1   7   2   57.29    3.61
  -1  -7  -2   59.46    3.73
   1   7   2   68.77    5.03
   1   7   2   63.34    4.45
  -1  -7  -2   56.05    3.47
   1   7   2   65.53    4.38
  -1  -7  -3 4014.44   70.34
  -1  -7  -3 4293.36   71.68
  -1  -7  -3 4441.91   72.77
   1   7   3 4418.11   73.31
  -1  -7  -3 4149.39   71.35
   1   7   3 4281.27   72.21
   1   7   4   35.84    3.64
   1   7   4   37.34    3.06
  -1  -7  -4   31.98    2.69
   1   7   4   36.33    3.11
  -1  -7  -4   39.50    3.18
   1   7   4   39.40    3.75
   1   7   4   40.46    3.52
  -1  -7  -4   35.42    2.39
  -1  -7  -4   36.94    2.91
  -1  -7  -5   26.49    2.33
   1   7   5   27.89    2.94
   1   7   5   25.80    2.58
   1   7   5   24.66    2.78
   1   7   5   21.86    1.96
   1   7   5   28.69    2.97
  -1  -7  -5   26.92    2.51
   1   7   6  294.91    8.62
  -1  -7  -6  287.10    7.77
  -1  -7  -6  280.25    7.61
   1   7   6  299.26    8.69
   1   7   6  267.70    8.14
   1   7   7    0.25    0.77
   1   7   7    0.48    0.74
   1   8  -7   14.11    1.78
  -1  -8   7   11.10    1.69
  -1  -8   7   11.72    1.47
  -1  -8   7    9.42    1.47
  -1  -8   6   95.03    4.87
  -1  -8   6  100.70    4.82
  -1  -8   5    7.34    1.52
  -1  -8   5    8.92    1.89
  -1  -8   5    8.14    1.84
   1   8  -4   34.48    3.36
  -1  -8   4   33.13    3.16
   1   8  -4   28.69    2.50
   1   8  -4   29.77    2.62
   1   8  -4   28.43    2.49
  -1  -8   3  159.91    7.00
   1   8  -3  185.38    7.55
   1   8  -3  169.41    7.55
   1   8  -3  180.90    7.04
  -1  -8   3  156.32    6.36
   1   8  -3  175.65    7.00
  -1  -8   3  172.23    7.23
   1   8  -3  186.32    7.26
  -1  -8   2    6.08    1.52
  -1  -8   2    4.69    1.59
   1   8  -2    4.30    1.58
   1   8  -2    6.41    1.75
   1   8  -2    4.46    1.66
  -1  -8   2    5.34    1.80
   1   8  -2    5.28    1.75
   1   8  -2    5.34    1.65
   1   8  -1  351.64   11.00
  -1  -8   1  309.39    9.76
   1   8  -1  338.02   11.10
   1   8  -1  309.17   10.24
  -1  -8   1  322.16   10.44
  -1  -8   1  292.03    9.07
   1   8  -1  315.13    9.78
   1   8  -1  324.40   10.90
  -1  -8   0   26.02    2.45
   1   8   0   32.12    3.29
   1   8   0   30.67    3.29
   1   8   0   27.18    2.44
   1   8   0   28.17    2.47
   1   8   0   25.73    2.68
  -1  -8   0   30.53    3.10
  -1  -8   0   25.85    2.55
   1   8   0   30.81    3.31
  -1  -8  -1   92.80    4.57
   1   8   1  113.10    6.12
   1   8   1  100.40    4.98
  -1  -8  -1   91.35    4.49
   1   8   1  112.68    6.15
  -1  -8  -2   11.02    1.56
  -1  -8  -2   10.73    1.65
   1   8   2   11.67    1.97
   1   8   2   14.23    2.43
   1   8   2   12.86    2.20
  -1  -8  -2   13.05    2.06
   1   8   2   13.29    2.39
   1   8   3    8.56    1.73
   1   8   3    7.58    1.73
  -1  -8  -3    8.08    1.40
  -1  -8  -3    8.93    1.69
   1   8   3    6.89    1.27
   1   8   4  295.82    9.23
   1   8   4  265.84    8.54
  -1  -8  -4  275.77    8.03
   1   8   4  263.32    7.71
  -1  -8  -4  276.80    7.49
   1   8   4  293.74    9.26
   1   8   4  253.98    7.45
   1   8   5    8.84    1.54
   1   8   5   12.07    1.68
   1   8   5    9.06    1.27
   1   8   5   12.05    1.68
  -1  -8  -5    9.96    1.33
  -1  -8  -5   10.64    1.21
   1   9  -5    2.30    1.07
  -1  -9   4    1.13    1.08
  -1  -9   4    0.39    0.73
  -1  -9   4    0.99    1.03
   1   9  -4    2.01    1.13
  -1  -9   3  267.65    8.39
   1   9  -3  264.11    7.59
  -1  -9   3  277.76    8.65
   1   9  -3  279.97    8.14
   1   9  -3  258.10    7.57
  -1  -9   2   13.20    1.64
   1   9  -2   16.17    1.96
  -1  -9   2   13.82    1.93
  -1  -9   2   13.54    2.06
   1   9  -2   15.25    1.95
   1   9  -2   14.76    1.90
   1   9  -2   15.71    2.09
  -1  -9   1    2.96    1.33
  -1  -9   1    2.68    1.12
   1   9  -1    3.63    1.31
   1   9  -1    3.64    1.35
  -1  -9   1    1.97    0.93
   1   9  -1    2.57    0.97
   1   9  -1    2.91    1.35
  -1  -9   0   86.45    3.90
  -1  -9   0   87.84    4.09
   1   9   0  112.33    5.43
   1   9   0  108.32    5.33
   1   9   0  111.22    5.24
  -1  -9  -1    4.69    1.04
  -1  -9  -1    5.31    1.06
   1   9   1    7.72    1.67
   1   9   1    7.23    1.64
   1   9   2  641.53   14.55
   1   9   2  592.90   13.64
  -1  -9  -2  585.32   13.43
   1   9   2  651.72   14.69
   1   9   3  557.83   12.70
   1   9   3  552.11   12.74
  -1  -9  -3  529.57   11.69
   1   9   3  506.87   11.43
   1   9   3  479.59   11.44
  -2  10   1   26.67    2.05
  -2  10  -1    0.07    0.67
  -2  10  -1    0.24    0.76
  -2  10  -2  356.81    8.66
  -2   9   4   38.29    2.75
  -2   9   4   35.90    2.43
  -2   9   4   36.93    2.46
  -2   9   4   35.27    2.67
  -2   9   3  321.37    8.68
  -2   9   3  327.19    9.35
  -2   9   3  330.16    9.22
  -2   9   3  323.09    9.34
  -2   9   2   11.91    1.60
  -2   9   2   10.77    1.71
   2  -9  -2   12.31    1.53
  -2   9   2   10.48    1.78
  -2   9   2    9.41    1.61
  -2   9   1   34.04    2.62
  -2   9   1   32.72    2.62
   2  -9  -1   27.52    2.38
  -2   9   1   34.36    2.94
   2  -9  -1   26.90    2.29
   2  -9  -1   32.52    2.44
   2  -9   0    1.85    1.08
   2  -9   0    1.34    0.99
   2  -9   0    1.91    1.23
  -2   9   0    2.34    1.34
   2  -9   1  114.40    5.04
   2  -9   1  102.40    5.03
  -2   9  -1  109.32    5.06
   2  -9   1  100.51    4.57
  -2   9  -2  318.53    8.95
   2  -9   2  311.41    8.89
   2  -9   2  315.68    9.67
   2  -9   3  396.44    9.80
   2  -9   3  322.36    8.69
   2  -9   4  254.86    7.50
  -2   9  -4  347.30    9.25
   2  -9   4  312.15    8.20
   2  -9   4  280.99    8.75
   2  -9   5   40.58    2.46
   2  -9   5   43.42    2.93
   2  -9   5   47.87    2.70
  -2   8   6   79.01    3.75
  -2   8   6   85.14    4.28
  -2   8   6   86.23    4.35
  -2   8   6   72.88    3.11
  -2   8   5  426.06   11.76
  -2   8   5  383.92   10.03
  -2   8   5  405.01   10.56
  -2   8   5  422.63   11.79
  -2   8   4   41.57    3.57
  -2   8   4   41.24    3.15
  -2   8   4   36.68    3.09
   2  -8  -4   33.44    2.58
  -2   8   4   38.55    3.49
   2  -8  -3   96.23    4.58
  -2   8   3  104.72    5.11
  -2   8   3  110.81    5.87
  -2   8   3  105.57    5.79
   2  -8  -2 1859.09   35.09
  -2   8   2 1958.46   36.98
  -2   8   2 2039.89   35.71
   2  -8  -2 1812.47   35.73
  -2   8   2 1836.56   36.80
   2  -8  -2 1706.53   34.21
  -2   8   2 1951.13   37.03
  -2   8   2 1989.59   37.18
   2  -8  -1  151.70    6.28
   2  -8  -1  158.24    6.79
   2  -8  -1  145.91    6.28
  -2   8   1  159.03    6.84
   2  -8  -1  174.98    6.35
  -2   8   1  166.43    7.28
  -2   8   1  163.98    7.77
  -2   8   1  158.76    6.87
  -2   8   0  669.11   14.88
   2  -8   0  653.95   16.47
  -2   8   0  689.77   18.54
  -2   8   0  650.29   15.71
   2  -8   0  662.70   15.91
   2  -8   0  715.76   16.25
  -2   8   0  744.06   17.47
  -2   8   0  632.69   15.68
   2  -8   0  620.57   15.92
   2  -8   1   74.05    4.67
   2  -8   1   57.08    3.50
   2  -8   1   76.01    4.71
  -2   8  -1   72.69    5.40
   2  -8   1   71.56    4.38
   2  -8   1   76.92    4.54
  -2   8  -1   78.64    4.76
  -2   8  -2  961.31   22.75
   2  -8   2  762.33   18.54
   2  -8   2  998.39   20.62
   2  -8   2  879.38   20.25
   2  -8   2  929.44   19.80
   2  -8   2  791.14   20.21
  -2   8  -2  899.11   19.64
   2  -8   3   22.15    2.53
   2  -8   3   27.39    2.76
  -2   8  -3   27.82    3.40
   2  -8   3   24.80    2.80
   2  -8   3   28.43    2.88
  -2   8  -3   24.97    2.33
   2  -8   3   25.72    3.12
   2  -8   4    1.26    1.23
   2  -8   4    2.16    1.29
   2  -8   5   26.31    2.55
   2  -8   5   24.94    2.67
   2  -8   6    0.04    0.97
  -2   8  -6   -0.21    1.06
   2  -8   6    0.24    0.89
   2  -8   7  105.90    4.38
  -2   7   7  603.51   13.61
  -2   7   7  618.39   13.52
  -2   7   6  400.70    9.90
   2  -7  -6  389.93   10.05
  -2   7   6  398.02   10.61
  -2   7   5   24.73    2.69
   2  -7  -5   23.78    2.55
   2  -7  -5   23.17    2.34
  -2   7   5   25.01    2.59
  -2   7   5   25.58    2.51
  -2   7   4  190.05    7.60
   2  -7  -4  179.22    6.83
   2  -7  -4  169.54    6.99
  -2   7   4  164.23    6.38
   2  -7  -3  385.43   10.94
  -2   7   3  369.57   11.77
  -2   7   3  414.34   11.57
   2  -7  -3  391.46   11.30
   2  -7  -3  344.45    9.87
   2  -7  -3  366.45    9.44
  -2   7   3  369.22    9.95
  -2   7   2   21.95    2.81
  -2   7   2   22.00    2.54
  -2   7   2   20.32    2.99
   2  -7  -2   21.67    2.52
   2  -7  -2   20.10    2.15
   2  -7  -2   21.43    2.52
  -2   7   2   22.49    2.82
   2  -7  -2   17.94    2.25
   2  -7  -1 1311.34   26.64
   2  -7  -1 1323.00   26.45
  -2   7   1 1299.55   30.02
  -2   7   1 1312.31   27.17
   2  -7  -1 1226.37   26.00
  -2   7   1 1309.64   27.25
   2  -7  -1 1316.75   25.74
   2  -7   0 4907.73   75.17
  -2   7   0 4337.35   75.37
   2  -7   0 4647.17   75.56
  -2   7   0 4882.91   81.36
   2  -7   0 4717.63   76.04
   2  -7   0 4432.58   75.73
  -2   7   0 4369.29   75.48
   2  -7   1   17.62    2.58
   2  -7   1   16.34    2.09
   2  -7   1   25.01    2.77
   2  -7   1   21.63    2.51
   2  -7   1   18.23    2.39
  -2   7  -2  676.67   18.75
   2  -7   2  539.24   14.65
   2  -7   2  682.91   15.58
   2  -7   2  668.89   15.81
  -2   7  -2  613.47   15.39
   2  -7   2  588.80   15.95
   2  -7   2  620.18   15.95
   2  -7   3  122.00    6.08
   2  -7   3  120.49    6.17
   2  -7   3  119.26    6.48
  -2   7  -3  126.65    7.23
   2  -7   3  137.36    6.16
   2  -7   3  136.19    6.19
  -2   7  -3  115.48    5.27
   2  -7   4  684.00   17.48
  -2   7  -4  696.24   18.64
   2  -7   4  634.94   17.30
   2  -7   5  182.25    7.92
   2  -7   5  195.36    7.79
  -2   7  -5  183.47    7.99
   2  -7   5  211.60    7.82
  -2   7  -6   16.17    2.33
   2  -7   6   16.08    2.43
   2  -7   6   16.43    2.60
   2  -7   6   18.72    2.38
  -2   7  -7  311.68    8.80
   2  -7   7  322.48    9.79
   2  -7   7  337.25    9.52
   2  -6  -8   66.13    3.18
  -2   6   8   71.33    3.46
  -2   6   8   74.17    3.82
   2  -6  -7    6.46    1.73
  -2   6   7    5.98    1.56
   2  -6  -7    6.75    1.42
  -2   6   7    5.84    1.45
   2  -6  -7    5.67    1.71
   2  -6  -6   54.72    4.34
  -2   6   6   52.80    3.79
  -2   6   6   53.06    3.39
   2  -6  -6   53.73    3.60
   2  -6  -6   56.86    4.45
  -2   6   6   54.13    3.81
   2  -6  -5 1368.31   29.38
   2  -6  -5 1298.66   26.72
   2  -6  -5 1347.22   29.29
  -2   6   5 1360.86   27.27
   2  -6  -4   19.93    2.39
   2  -6  -4   21.20    2.41
  -2   6   4   17.84    2.56
  -2   6   4   21.15    2.63
   2  -6  -4   17.95    1.81
  -2   6   4   20.98    2.35
  -2   6   3  128.21    5.33
   2  -6  -3  119.57    4.83
   2  -6  -3  136.00    6.46
   2  -6  -3  140.52    6.57
  -2   6   3  139.52    6.07
   2  -6  -3  133.14    5.78
   2  -6  -3  117.68    4.88
   2  -6  -3  129.75    6.21
   2  -6  -3  123.50    5.52
  -2   6   3  123.24    6.80
   2  -6  -2    1.35    1.26
  -2   6   2    2.49    1.31
   2  -6  -2    2.31    1.35
   2  -6  -2    1.11    1.04
   2  -6  -2    2.06    1.22
  -2   6   2    2.99    1.91
  -2   6   2    1.44    0.87
   2  -6  -2    2.71    1.27
   2  -6  -2    1.73    1.38
   2  -6  -2    4.77    1.24
   2  -6  -1  117.55    5.02
  -2   6   1  125.64    7.33
   2  -6  -1  125.48    5.46
   2  -6  -1  117.24    5.47
  -2   6   1  130.31    5.38
   2  -6  -1  111.93    5.11
   2  -6  -1  122.28    5.41
   2  -6  -1  135.37    6.10
   2  -6  -1  114.95    5.37
   2  -6   0 1500.77   29.52
  -2   6   0 1598.29   31.07
   2  -6   0 1774.03   31.02
  -2   6   0 1638.08   30.36
   2  -6   0 1759.90   31.56
   2  -6   0 1619.47   31.25
   2  -6   0 1721.58   31.51
  -2   6   0 1591.74   31.11
   2  -6   1 1129.16   23.89
  -2   6  -1 1329.06   28.87
   2  -6   1 1103.43   22.90
   2  -6   1 1263.48   24.02
  -2   6  -1 1040.20   22.51
  -2   6  -1 1131.23   22.00
   2  -6   1 1249.78   23.46
   2  -6   1 1176.30   23.47
  -2   6  -1 1084.46   22.61
   2  -6   2   50.24    3.54
   2  -6   2   42.30    3.66
   2  -6   2   49.53    3.53
  -2   6  -2   49.99    4.71
   2  -6   2   53.57    3.73
   2  -6   2   47.21    3.35
  -2   6  -3  146.16    7.65
   2  -6   3  131.93    5.07
   2  -6   3  164.04    6.79
   2  -6   3  131.01    6.57
   2  -6   3  162.33    6.61
  -2   6  -3  137.23    5.55
   2  -6   3  143.72    6.42
   2  -6   4  705.96   17.79
  -2   6  -4  717.98   18.67
   2  -6   4  734.27   16.83
   2  -6   4  768.78   17.48
   2  -6   4  732.78   17.63
   2  -6   5  131.73    6.85
   2  -6   5  118.92    5.22
   2  -6   5  144.30    6.65
  -2   6  -5  122.24    6.39
   2  -6   5  131.43    5.94
   2  -6   5  144.68    6.55
  -2   6  -6   47.15    3.68
   2  -6   6   43.54    3.13
   2  -6   6   52.60    4.33
   2  -6   6   52.68    3.89
  -2   6  -7   11.44    1.79
   2  -6   7   12.63    2.25
   2  -6   7   12.04    2.10
   2  -6   7   11.37    1.63
   2  -6   8  143.53    6.06
   2  -6   8  147.54    6.02
   2  -6   9    1.46    0.96
   2  -6   9    1.41    0.90
  -2   6  -9    1.11    0.98
   2  -5  -9   97.37    3.94
   2  -5  -8   52.27    3.88
  -2   5   8   56.92    3.79
   2  -5  -8   51.59    3.85
   2  -5  -8   50.88    3.35
  -2   5   8   54.09    3.27
   2  -5  -7  804.86   18.90
   2  -5  -7  904.47   20.97
   2  -5  -7  833.48   18.88
  -2   5   7  914.19   19.91
  -2   5   7  808.32   18.69
   2  -5  -7  916.52   21.00
   2  -5  -6  841.02   20.93
  -2   5   6  856.97   19.21
  -2   5   6  809.80   18.15
   2  -5  -6  834.77   20.87
  -2   5   6  880.48   19.68
   2  -5  -6  863.40   19.10
   2  -5  -5    6.03    1.91
  -2   5   5    6.54    1.65
  -2   5   5    5.55    1.26
   2  -5  -5    4.67    1.48
   2  -5  -5    4.68    1.83
   2  -5  -5    6.34    1.55
   2  -5  -4    0.39    0.72
   2  -5  -4    0.78    1.25
   2  -5  -4    0.77    1.30
  -2   5   4    0.33    0.70
   2  -5  -4    0.17    1.05
  -2   5   4    1.38    1.15
  -2   5   4    0.29    1.02
   2  -5  -4    0.92    1.09
   2  -5  -4    0.35    0.77
   2  -5  -3    4.79    1.13
  -2   5   3    4.27    1.33
   2  -5  -3    3.26    1.28
   2  -5  -3    3.21    1.18
   2  -5  -3    4.53    1.05
  -2   5   3    4.58    1.17
   2  -5  -3    4.05    1.04
   2  -5  -2  814.67   16.86
   2  -5  -2  819.62   17.19
   2  -5  -2  832.99   18.15
   2  -5  -2  779.70   16.19
   2  -5  -2  838.98   17.20
   2  -5  -2  814.34   17.84
   2  -5  -2  801.45   17.06
   2  -5  -2  788.07   16.52
  -2   5   2  776.80   16.31
   2  -5  -2  844.70   18.18
   2  -5  -1  744.86   15.05
   2  -5  -1  645.85   15.18
   2  -5  -1  703.17   14.60
   2  -5  -1  694.00   15.13
   2  -5  -1  657.59   15.23
   2  -5  -1  751.17   15.29
   2  -5  -1  710.29   15.14
   2  -5  -1  670.04   15.43
   2  -5  -1  645.23   14.54
   2  -5   0   12.46    1.47
   2  -5   0   15.13    1.88
   2  -5   0   10.77    1.50
   2  -5   0   15.90    1.86
   2  -5   0   14.00    1.57
   2  -5   0   14.74    1.82
   2  -5   0   13.85    1.36
   2  -5   0   13.64    1.70
   2  -5   0   12.86    1.89
   2  -5   0   12.31    1.53
   2  -5   1   41.81    2.79
   2  -5   1   44.23    2.98
   2  -5   1   45.35    2.92
   2  -5   1   39.85    2.95
   2  -5   1   44.42    3.01
   2  -5   1   38.88    2.08
  -2   5  -1   42.22    4.15
   2  -5   2  354.59    9.72
   2  -5   2  314.64    9.32
   2  -5   2  351.76    9.76
   2  -5   2  385.38   10.06
   2  -5   2  340.34    9.95
  -2   5  -2  365.58   12.40
   2  -5   3   36.04    2.87
   2  -5   3   31.41    2.85
   2  -5   3   35.54    3.21
   2  -5   3   32.86    2.56
  -2   5  -3   32.38    3.57
   2  -5   3   28.87    2.22
   2  -5   3   41.40    3.17
   2  -5   4 1248.79   24.65
   2  -5   4 1313.56   26.60
   2  -5   4 1309.79   26.09
  -2   5  -4 1249.45   27.32
   2  -5   4 1345.39   25.71
   2  -5   5    7.94    1.79
   2  -5   5    4.72    1.33
   2  -5   5    8.60    1.97
  -2   5  -5    5.84    1.72
   2  -5   5    6.12    1.17
   2  -5   6  313.36    8.72
   2  -5   6  290.40    9.33
   2  -5   7   55.40    4.36
   2  -5   7   56.68    4.32
   2  -5   7   48.23    3.48
   2  -5   7   48.93    3.20
   2  -5   8  400.65   11.56
   2  -5   8  380.76   10.45
   2  -5   9  129.00    5.30
   2  -5   9  120.56    5.09
  -2   5  -9  129.18    5.46
   2  -4 -10    3.90    0.97
  -2   4  10    4.63    1.02
  -2   4   9   13.63    1.91
   2  -4  -9   13.05    1.93
   2  -4  -9   13.33    1.97
   2  -4  -9   12.73    1.82
  -2   4   8    0.19    0.99
   2  -4  -8    0.33    1.23
   2  -4  -8    1.34    1.06
   2  -4  -8    0.06    1.19
  -2   4   8    1.33    0.96
   2  -4  -8    1.40    1.29
   2  -4  -7  105.10    5.16
   2  -4  -7  113.93    6.29
   2  -4  -7  113.45    6.27
  -2   4   7  106.81    5.11
  -2   4   7  100.91    5.26
   2  -4  -7  111.01    5.48
  -2   4   7  108.56    5.58
   2  -4  -6 1694.60   31.10
  -2   4   6 1590.91   30.97
   2  -4  -6 1666.28   33.25
  -2   4   6 1551.43   30.53
   2  -4  -6 1484.31   29.54
   2  -4  -6 1596.50   30.64
   2  -4  -6 1661.05   33.14
  -2   4   6 1632.17   31.55
  -2   4   5   19.97    2.29
  -2   4   5   20.32    2.23
   2  -4  -5   22.52    2.28
   2  -4  -5   23.01    2.35
   2  -4  -5   26.73    2.36
   2  -4  -5   20.85    2.66
  -2   4   5   19.09    2.06
   2  -4  -5   21.05    2.69
   2  -4  -4   15.08    2.18
   2  -4  -4   16.50    1.89
  -2   4   4   15.67    1.68
   2  -4  -4   15.36    1.65
   2  -4  -4   13.14    1.48
   2  -4  -4   14.94    1.83
  -2   4   4   16.65    1.92
   2  -4  -3 4727.86   77.67
   2  -4  -3 4588.78   76.82
  -2   4   3 4701.01   76.19
   2  -4  -3 4504.21   75.56
   2  -4  -3 4661.55   77.03
  -2   4   3 4635.38   77.19
   2  -4  -3 4854.06   77.27
  -2   4   2 4011.67   68.55
   2  -4  -2 4081.71   67.94
   2  -4  -2 4300.55   69.63
   2  -4  -2 4623.54   69.56
  -2   4   2 4024.53   67.43
   2  -4  -2 4343.75   69.16
   2  -4  -2 4266.95   70.19
   2  -4  -2 4525.88   69.43
   2  -4  -2 4035.67   68.87
   2  -4  -2 4291.58   70.20
  -2   4   2 4082.71   68.81
   2  -4  -1  366.42    8.71
   2  -4  -1  299.87    8.38
  -2   4   1  315.09    6.58
  -2   4   1  345.60    7.90
   2  -4  -1  365.35    8.13
   2  -4  -1  339.54    7.95
   2  -4  -1  339.97    8.42
   2  -4  -1  332.19    8.30
   2  -4  -1  371.09    8.92
   2  -4  -1  359.13    8.86
   2  -4  -1  297.77    8.38
   2  -4   0  264.65    7.03
   2  -4   0  221.36    6.46
   2  -4   0  244.81    6.54
   2  -4   0  265.52    7.07
   2  -4   0  267.52    7.02
   2  -4   0  254.53    6.96
   2  -4   0  266.23    6.10
   2  -4   0  261.99    7.05
   2  -4   0  263.94    6.97
   2  -4   0  222.42    6.49
   2  -4   1    0.19    0.38
   2  -4   1    0.16    0.71
   2  -4   1    0.35    0.75
   2  -4   1    0.03    0.84
   2  -4   1    0.62    0.96
   2  -4   1   -0.09    0.85
   2  -4   1    0.50    0.80
   2  -4   1   -0.04    0.41
   2  -4   1    0.03    0.80
   2  -4   2 6472.76   96.20
   2  -4   2 6011.13   96.29
   2  -4   2 5949.33   94.79
   2  -4   2 6315.65   95.82
   2  -4   2 6230.00   95.24
   2  -4   3   17.04    1.43
   2  -4   3   20.55    2.17
   2  -4   3   18.78    1.80
  -2   4  -3   18.02    2.71
   2  -4   3   20.13    2.25
   2  -4   3   17.68    1.60
   2  -4   3   24.24    2.31
   2  -4   4  195.07    7.20
   2  -4   4  205.50    7.02
   2  -4   4  173.24    5.65
   2  -4   4  169.35    5.77
  -2   4  -4  175.69    7.26
   2  -4   4  177.45    5.84
  -2   4  -5  215.89    7.79
   2  -4   5  254.02    7.71
   2  -4   5  260.57    8.59
   2  -4   5  230.41    7.52
   2  -4   5  232.32    7.23
   2  -4   5  255.18    8.86
  -2   4  -6  139.75    5.83
   2  -4   6  183.77    7.75
   2  -4   6  148.73    6.20
   2  -4   6  197.98    7.00
   2  -4   6  155.98    6.63
   2  -4   6  169.80    7.36
   2  -4   7  147.23    7.09
   2  -4   7  142.02    6.20
   2  -4   7  136.33    6.66
   2  -4   7  123.30    5.84
   2  -4   7  125.56    6.00
   2  -4   8  406.69   11.60
   2  -4   8  459.78   12.72
   2  -4   8  455.92   12.83
   2  -4   8  401.59   11.59
  -2   4  -9  139.90    6.10
   2  -4   9  129.78    5.41
   2  -4   9  139.31    5.84
   2  -4   9  136.88    5.82
   2  -4   9  142.20    5.59
   2  -4  10  149.31    4.94
   2  -4  10  142.02    4.61
   2  -4  10  138.01    4.57
   2  -4  10  155.66    5.18
  -2   4 -10  148.76    5.13
   2  -3 -10  402.36   10.32
  -2   3  10  437.60   10.38
   2  -3  -9    1.98    1.20
  -2   3   9    1.94    0.93
  -2   3   9    2.14    1.32
   2  -3  -9    2.03    1.21
   2  -3  -9    1.96    1.38
   2  -3  -8  357.60   11.35
   2  -3  -8  309.95    9.81
  -2   3   8  328.33   10.65
  -2   3   8  291.69    8.63
  -2   3   8  335.74   10.41
  -2   3   8  369.18    9.52
   2  -3  -8  347.01   11.22
   2  -3  -8  344.24   10.43
   2  -3  -7 7876.51  127.98
   2  -3  -7 7285.63  125.37
   2  -3  -7 7866.38  126.09
  -2   3   7 8100.25  124.41
  -2   3   7 7260.59  124.54
   2  -3  -7 7859.71  127.97
  -2   3   7 7820.08  126.80
   2  -3  -6    7.98    1.87
  -2   3   6    9.23    1.77
  -2   3   6    9.11    1.70
   2  -3  -6    9.05    1.98
  -2   3   6   15.84    1.90
   2  -3  -6   10.43    1.78
   2  -3  -6    9.60    1.79
  -2   3   6   10.05    1.39
  -2   3   5   49.19    2.56
   2  -3  -5   49.51    3.63
  -2   3   5   50.72    3.24
  -2   3   5   53.55    3.23
   2  -3  -5   51.11    3.12
   2  -3  -5   43.10    2.40
   2  -3  -5   52.52    3.22
   2  -3  -5   50.62    3.07
  -2   3   5   52.24    3.15
   2  -3  -5   53.80    3.79
   2  -3  -4  177.30    5.55
   2  -3  -4  161.57    6.28
   2  -3  -4  184.47    6.33
  -2   3   4  167.37    5.47
   2  -3  -4  167.36    5.28
   2  -3  -4  158.07    5.00
   2  -3  -4  174.64    5.71
   2  -3  -4  155.94    5.33
  -2   3   4  156.26    5.58
   2  -3  -4  160.49    6.29
   2  -3  -3   19.53    1.64
   2  -3  -3   18.65    1.74
   2  -3  -3   19.98    1.86
   2  -3  -3   19.31    1.69
   2  -3  -3   17.34    1.69
   2  -3  -3   17.32    1.64
   2  -3  -3   16.75    1.74
  -2   3   3   17.20    1.64
  -2   3   3   19.58    1.76
   2  -3  -2 3816.96   66.26
   2  -3  -2 4207.54   65.98
   2  -3  -2 3891.70   66.33
   2  -3  -2 3808.33   65.66
  -2   3   2 4011.70   65.62
   2  -3  -2 4189.58   65.79
   2  -3  -2 4093.27   65.97
   2  -3  -2 4268.95   65.56
   2  -3  -1  185.49    5.44
  -2   3   1  200.65    4.97
   2  -3  -1  206.20    5.09
   2  -3  -1  203.39    5.66
   2  -3  -1  202.08    5.41
   2  -3  -1  200.63    5.53
   2  -3   0  162.21    4.34
   2  -3   0  181.50    4.09
  -2   3   0  159.80    3.70
   2  -3   0  178.19    5.02
   2  -3   0  188.12    5.15
   2  -3   1  554.88    9.35
   2  -3   1  572.44    9.52
   2  -3   2 2649.23   42.20
   2  -3   2 2685.28   44.88
   2  -3   2 2682.87   44.60
   2  -3   2 2615.98   44.29
   2  -3   2 2776.07   45.21
  -2   3  -3  368.96   10.80
   2  -3   3  402.79    9.89
   2  -3   3  401.50    9.87
   2  -3   3  380.69    8.66
   2  -3   3  392.11    8.80
   2  -3   3  398.22    7.45
   2  -3   3  364.40    8.57
   2  -3   3  392.17    9.34
   2  -3   4  147.92    4.60
   2  -3   4  126.50    4.60
   2  -3   4  131.30    4.99
   2  -3   4  142.62    5.01
   2  -3   4  131.00    5.32
  -2   3  -4  128.14    5.52
   2  -3   4  132.80    3.75
   2  -3   5    0.99    1.00
   2  -3   5    0.69    0.87
   2  -3   5    0.46    0.92
   2  -3   5    0.35    0.68
   2  -3   5    0.49    0.52
   2  -3   5    2.42    1.34
  -2   3  -5    0.50    0.85
   2  -3   5    0.74    1.20
   2  -3   5    0.95    1.16
   2  -3   6   86.73    4.98
   2  -3   6   85.93    4.75
  -2   3  -6   95.97    6.24
   2  -3   6   75.80    4.19
   2  -3   6   80.23    4.70
   2  -3   6   68.59    4.09
   2  -3   6   68.89    3.14
   2  -3   7   15.70    2.21
   2  -3   7   16.67    2.58
   2  -3   7   22.42    2.72
  -2   3  -7   15.16    2.97
   2  -3   7   16.66    2.54
   2  -3   7   14.07    2.15
   2  -3   8 1988.17   37.53
   2  -3   8 2077.43   37.93
  -2   3  -8 1824.11   39.39
   2  -3   8 1944.03   37.21
   2  -3   8 1838.81   36.49
  -2   3  -8 1890.01   37.38
   2  -3   9  796.23   17.83
   2  -3   9  769.89   18.09
  -2   3  -9  794.13   17.97
   2  -3   9  810.40   18.04
   2  -3   9  765.79   17.59
   2  -3  10    5.15    1.14
   2  -3  10    5.71    1.29
   2  -3  10    4.95    1.15
   2  -3  10    5.62    1.26
  -2   3 -10    5.12    1.19
   2  -2 -11   52.84    2.73
  -2   2  10   42.65    2.68
   2  -2 -10   41.65    3.11
  -2   2  10   50.71    3.01
  -2   2  10   49.34    2.88
  -2   2   9 1018.41   21.86
   2  -2  -9 1112.93   23.17
   2  -2  -9  922.20   21.48
  -2   2   9 1052.79   23.41
   2  -2  -9 1084.49   22.85
  -2   2   9 1208.03   22.14
   2  -2  -9 1134.07   23.27
  -2   2   9 1064.48   22.43
  -2   2   8 1895.91   37.98
   2  -2  -8 2101.02   39.74
  -2   2   8 2157.89   40.27
   2  -2  -8 2090.09   38.81
   2  -2  -8 1924.00   37.92
  -2   2   8 2259.37   38.26
  -2   2   8 2061.22   38.86
   2  -2  -8 2086.49   39.70
  -2   2   7   17.79    1.85
  -2   2   7   19.88    2.42
  -2   2   7   18.90    2.25
   2  -2  -7   20.72    2.62
   2  -2  -7   23.17    2.74
   2  -2  -7   16.48    2.18
  -2   2   7   21.73    2.20
  -2   2   7   20.18    2.38
   2  -2  -7   20.49    2.49
   2  -2  -6  216.59    7.52
  -2   2   6  201.92    6.83
   2  -2  -6  202.50    7.64
  -2   2   6  228.39    7.69
  -2   2   6  208.65    6.52
   2  -2  -6  205.77    7.07
  -2   2   6  213.07    6.56
  -2   2   6  210.55    7.30
   2  -2  -6  202.58    7.67
   2  -2  -5   94.29    3.55
  -2   2   5   96.37    4.01
   2  -2  -5   88.34    4.57
  -2   2   5  109.65    4.53
   2  -2  -5   99.16    3.86
   2  -2  -5  101.31    4.27
   2  -2  -5  118.13    4.73
   2  -2  -5   90.60    3.72
  -2   2   5  101.96    3.81
   2  -2  -5   86.94    4.57
   2  -2  -4   12.59    1.60
   2  -2  -4    9.39    1.34
   2  -2  -4   10.05    1.52
   2  -2  -4   11.67    1.34
  -2   2   4   13.93    1.55
   2  -2  -4   11.36    1.30
   2  -2  -4   11.75    1.50
   2  -2  -4    9.27    1.54
   2  -2  -4   10.73    1.27
  -2   2   3 2608.54   42.87
   2  -2  -3 2541.18   42.82
  -2   2   3 2535.60   42.26
   2  -2  -3 2698.90   42.14
   2  -2  -3 2565.96   42.35
   2  -2  -3 2532.32   42.19
  -2   2   2  312.98    7.01
  -2   2   2  285.46    6.69
   2  -2  -2  290.52    6.95
   2  -2  -2  315.03    7.11
   2  -2   0 2589.74   40.68
   2  -2   0 2659.46   41.21
   2  -2   1   98.69    2.56
   2  -2   1  100.19    3.25
   2  -2   1  100.04    3.18
   2  -2   3  350.82    8.06
   2  -2   3  338.05    7.19
   2  -2   4  323.45    8.57
   2  -2   4  306.33    6.28
  -2   2  -4  318.40    8.23
   2  -2   4  349.96    8.42
   2  -2   4  348.74    9.05
   2  -2   4  374.58    7.93
   2  -2   4  356.70    9.11
   2  -2   4  325.73    8.11
   2  -2   5  107.38    4.85
   2  -2   5  103.49    4.39
   2  -2   5   96.95    4.69
   2  -2   5  106.94    4.12
  -2   2  -5  107.77    5.86
   2  -2   5  107.32    4.47
   2  -2   5  107.15    4.94
   2  -2   6  461.12   12.48
   2  -2   6  495.69   11.34
  -2   2  -6  446.07   13.66
   2  -2   6  491.01   13.03
   2  -2   6  466.93   12.40
   2  -2   6  399.75   11.11
   2  -2   6  422.92   11.63
   2  -2   7  380.07   10.45
   2  -2   7  401.20   11.75
  -2   2  -7  384.16   12.91
   2  -2   7  408.16   11.70
   2  -2   7  360.48   11.00
   2  -2   8  310.62    9.99
   2  -2   8  315.60   10.02
  -2   2  -8  320.19   11.54
  -2   2  -8  296.66    9.81
   2  -2   8  302.92    9.88
   2  -2   9  133.17    5.71
   2  -2   9  135.11    5.95
   2  -2   9  127.97    5.87
  -2   2  -9  125.18    5.55
   2  -2  10  102.27    4.13
   2  -2  10   97.68    4.34
   2  -2  10  102.75    4.37
  -2   1  11    5.30    0.98
  -2   1  11    4.90    0.96
   2  -1 -11    5.20    1.23
  -2   1  10    2.42    1.07
  -2   1  10    0.53    0.73
  -2   1  10    0.42    0.96
   2  -1 -10    0.46    1.16
  -2   1   9   11.87    1.95
   2  -1  -9   12.45    2.00
  -2   1   9    9.76    1.70
   2  -1  -9   10.09    1.86
  -2   1   9   10.03    1.98
   2  -1  -9   10.50    2.10
   2  -1  -9   12.97    2.02
  -2   1   8  852.60   19.97
   2  -1  -8  889.90   20.22
   2  -1  -8  780.43   18.84
   2  -1  -8  876.14   20.16
   2  -1  -8  928.32   20.51
  -2   1   8  963.01   19.71
  -2   1   8  864.53   19.50
  -2   1   7  361.55   10.18
  -2   1   7  336.78   10.31
   2  -1  -7  342.97   10.64
  -2   1   7  363.96   10.73
   2  -1  -7  314.31    9.65
  -2   1   7  365.96    9.96
   2  -1  -7  376.04   10.83
   2  -1  -7  346.46   10.70
  -2   1   6  191.83    6.50
   2  -1  -6  155.97    5.40
   2  -1  -6  162.50    6.45
   2  -1  -6  149.57    4.85
  -2   1   6  180.65    5.91
  -2   1   6  169.50    5.30
   2  -1  -6  163.03    6.49
  -2   1   6  191.54    6.66
   2  -1  -6  202.50    6.91
   2  -1  -6  168.27    6.05
  -2   1   6  179.20    6.18
   2  -1  -5  668.98   15.74
  -2   1   5  744.97   15.51
   2  -1  -5  750.58   14.95
  -2   1   5  820.95   15.99
   2  -1  -5  794.17   16.04
   2  -1  -5  770.48   15.36
  -2   1   5  727.97   14.74
   2  -1  -5  742.12   14.60
   2  -1  -5  680.78   15.83
   2  -1  -4  290.90    8.04
  -2   1   4  260.68    6.85
  -2   1   4  299.93    7.36
   2  -1  -4  273.73    6.81
   2  -1  -4  263.11    7.44
   2  -1  -4  285.94    6.96
   2  -1  -4  269.99    6.69
  -2   1   4  271.16    7.36
   2  -1  -4  264.19    7.45
   2  -1  -3    7.20    1.00
   2  -1  -3    6.60    1.08
   2  -1  -3    6.09    0.97
  -2   1   3   10.38    1.19
  -2   1   3    8.50    1.10
  -2   1   1 2004.56   34.38
   2  -1  -1 2201.04   33.41
   2  -1  -1 2120.67   33.71
   2  -1  -1 1939.39   34.08
  -2   1   1 2068.95   33.57
   2  -1   1  862.59   15.27
   2  -1   1  908.90   15.50
   2  -1   1  875.18   15.13
  -2   1  -2 1386.34   21.88
   2  -1   2 1433.42   23.97
   2  -1   2 1433.19   23.34
   2  -1   2 1385.45   23.62
   2  -1   3    5.07    0.55
   2  -1   3    4.74    1.07
   2  -1   3    5.03    0.93
   2  -1   3    4.70    0.62
  -2   1  -3    4.45    0.52
   2  -1   4   68.11    3.41
  -2   1  -4   63.92    3.98
   2  -1   4   65.51    3.05
   2  -1   4   61.29    2.40
   2  -1   4   69.16    3.43
   2  -1   4   58.97    2.97
   2  -1   4   61.55    2.85
  -2   1  -4   74.95    2.50
   2  -1   5    1.52    0.91
   2  -1   5    5.02    1.32
   2  -1   5    3.72    1.06
  -2   1  -5    3.53    1.73
   2  -1   5    2.34    1.19
   2  -1   5    2.20    0.91
   2  -1   6   29.84    2.76
   2  -1   6   32.81    3.05
  -2   1  -6   32.40    3.35
   2  -1   6   34.16    2.94
   2  -1   6   32.23    2.69
   2  -1   6   30.04    2.65
   2  -1   7 1698.27   33.10
   2  -1   7 1699.62   32.82
  -2   1  -7 1630.91   34.95
  -2   1  -7 1573.93   32.18
   2  -1   7 1739.71   32.92
   2  -1   7 1646.62   32.72
   2  -1   8  274.68    9.14
   2  -1   8  304.49   10.42
   2  -1   8  290.83    9.56
  -2   1  -8  275.98   10.40
  -2   1  -8  256.23    8.62
   2  -1   8  269.25    9.10
   2  -1   8  269.32    9.36
   2  -1   9  185.61    6.71
   2  -1   9  191.92    7.65
   2  -1   9  178.33    7.16
   2  -1   9  200.80    7.28
   2  -1  10  329.87    8.82
   2  -1  10  340.42    8.34
   2  -1  10  317.75    9.43
   2  -1  10  322.57    8.99
  -2   0  11   90.09    3.68
   2   0 -11   82.97    3.91
  -2   0  10    4.32    1.30
  -2   0  10    3.68    1.46
   2   0 -10    3.14    1.48
   2   0  -9  172.92    7.37
  -2   0   9  166.19    7.32
   2   0  -9  164.50    6.50
  -2   0   9  166.78    7.19
   2   0  -9  137.00    6.04
  -2   0   9  182.79    6.94
  -2   0   9  138.72    5.61
   2   0  -9  160.43    6.47
   2   0  -8    8.61    1.78
  -2   0   8    8.48    1.83
   2   0  -8    9.30    1.88
  -2   0   8    8.40    1.96
   2   0  -8    9.41    1.82
   2   0  -8   12.45    2.32
  -2   0   8   11.73    1.91
  -2   0   8    7.84    1.54
   2   0  -7   20.62    2.01
   2   0  -7   19.50    2.33
  -2   0   7   22.80    2.53
   2   0  -7   18.99    2.14
   2   0  -7   25.98    2.76
  -2   0   7   21.02    2.20
  -2   0   7   29.11    2.86
  -2   0   7   18.49    2.09
   2   0  -7   23.29    2.49
   2   0  -6   12.53    1.69
  -2   0   6   17.05    2.06
   2   0  -6   15.83    1.73
   2   0  -6   15.28    1.94
   2   0  -6   13.56    1.44
  -2   0   6   20.03    1.92
  -2   0   6   14.00    1.73
   2   0  -6   14.21    1.88
  -2   0   5 3668.98   59.01
   2   0  -5 3519.85   58.04
   2   0  -5 3497.20   57.60
   2   0  -5 3530.63   59.64
  -2   0   5 3484.49   57.87
   2   0  -5 3418.64   57.94
   2   0  -5 3501.61   59.14
   2   0  -5 3465.69   59.05
  -2   0   4 6996.33  107.42
   2   0  -4 6619.14  106.90
   2   0  -4 6605.21  107.55
  -2   0   4 7156.03  107.98
   2   0  -4 6247.50  107.83
   2   0  -4 6846.00  107.43
   2   0  -4 6592.05  107.83
   2   0  -4 6614.10  107.59
  -2   0   3  613.25   11.55
  -2   0   3  624.36   11.77
   2   0  -3  535.57   10.41
   2   0  -3  526.83   10.93
  -2   0   2  385.38    8.55
   2   0  -2  401.29    8.25
  -2   0   2  412.99    8.29
   2   0  -2  411.31    7.23
  -2   0   1  701.12   10.88
   2   0  -1  582.46   10.59
   2   0  -1  656.43   11.06
   2   0  -1  637.02   10.87
   2   0  -1  545.53    9.39
   2   0   3 3882.87   66.18
  -2   0  -3 3899.82   64.97
  -2   0  -3 4170.21   67.20
   2   0   3 4106.99   65.09
   2   0   4  272.36    7.28
   2   0   4  278.44    7.52
   2   0   4  267.56    6.58
  -2   0  -4  255.41    6.30
   2   0   4  272.42    6.83
   2   0   4  273.33    7.56
  -2   0  -4  262.38    8.01
   2   0   4  267.23    6.52
   2   0   4  265.78    7.44
   2   0   4  269.36    6.82
   2   0   5  348.20    9.18
   2   0   5  335.10    9.12
   2   0   5  347.23    9.35
   2   0   5  358.37    9.61
  -2   0  -5  339.80    9.98
  -2   0  -5  304.72    8.43
   2   0   5  326.00    9.23
   2   0   5  307.97    7.97
   2   0   5  313.37    8.18
   2   0   5  316.31    8.24
   2   0   6  614.78   14.42
   2   0   6  609.44   14.77
   2   0   6  668.26   15.45
  -2   0  -6  621.33   15.65
  -2   0  -6  556.61   13.46
   2   0   6  622.69   14.87
   2   0   6  552.04   14.27
   2   0   6  602.35   13.39
   2   0   7   27.95    2.72
  -2   0  -7   26.57    3.16
   2   0   7   27.80    2.99
   2   0   7   27.67    2.92
   2   0   7   25.57    2.76
  -2   0  -7   23.26    2.36
   2   0   7   26.14    2.87
   2   0   8   21.89    2.63
   2   0   8   21.51    2.77
  -2   0  -8   22.08    2.95
   2   0   8   23.22    2.75
  -2   0  -8   16.20    2.02
   2   0   8   19.69    2.42
   2   0   8   19.64    2.62
   2   0   9  442.98   11.26
   2   0   9  456.89   12.54
   2   0   9  441.12   11.95
   2   0  10   43.38    2.89
   2   0  10   47.26    3.06
  -2  -1  11  160.39    5.92
   2   1 -11  159.43    5.78
  -2  -1  10  122.01    5.97
   2   1 -10  136.50    6.22
  -2  -1  10  139.73    5.82
   2   1  -9   29.73    2.75
  -2  -1   9   30.54    3.40
  -2  -1   9   32.10    3.10
   2   1  -9   35.65    3.49
  -2  -1   9   39.83    3.32
   2   1  -8   10.08    1.81
  -2  -1   8    8.66    1.45
  -2  -1   8    9.22    1.82
   2   1  -8    9.15    1.70
   2   1  -8    7.89    1.66
  -2  -1   8    8.93    2.18
   2   1  -8    6.12    1.38
  -2  -1   8   10.42    1.90
   2   1  -7  447.61   11.74
  -2  -1   7  527.21   13.99
   2   1  -7  523.95   13.05
  -2  -1   7  535.80   13.31
   2   1  -7  458.94   12.16
  -2  -1   7  534.10   12.89
  -2  -1   7  471.13   11.59
   2   1  -7  519.25   13.06
   2   1  -6  179.58    6.16
  -2  -1   6  207.19    7.22
   2   1  -6  192.47    6.77
   2   1  -6  172.97    6.20
   2   1  -6  179.05    6.62
   2   1  -6  170.41    5.71
  -2  -1   6  192.24    6.44
   2   1  -6  197.11    6.80
   2   1  -5 1174.53   21.84
  -2  -1   5 1182.60   21.79
   2   1  -5 1088.96   22.07
   2   1  -5 1053.98   21.24
   2   1  -5 1137.54   21.42
   2   1  -5 1128.52   22.92
  -2  -1   5 1168.04   22.64
   2   1  -5 1164.29   22.45
   2   1  -5 1111.71   22.16
  -2  -1   4   44.97    2.65
   2   1  -4   45.02    2.53
  -2  -1   4   45.69    2.47
   2   1  -4   36.44    2.35
  -2  -1   4   47.45    2.81
   2   1  -4   32.96    2.05
   2   1  -4   44.82    2.46
   2   1  -4   41.64    2.48
  -2  -1   4   37.21    2.22
   2   1  -4   42.79    2.75
   2   1  -4   37.00    2.38
   2   1  -2   14.27    1.32
   2   1  -2   14.35    0.66
  -2  -1   2   14.51    1.28
  -2  -1   1 4700.25   74.98
  -2  -1  -2  328.72    7.00
  -2  -1  -2  347.47    7.19
   2   1   2  327.20    7.45
   2   1   3 1388.50   25.62
   2   1   3 1524.57   25.75
  -2  -1  -3 1341.86   25.42
  -2  -1  -3 1561.00   26.32
   2   1   3 1345.64   26.00
   2   1   3 1584.32   26.40
   2   1   3 1619.47   26.34
   2   1   3 1411.83   26.00
   2   1   3 1418.08   25.82
   2   1   3 1456.77   25.86
   2   1   4 2802.46   46.07
   2   1   4 2747.89   46.25
  -2  -1  -4 2827.49   46.52
  -2  -1  -4 2555.52   45.08
   2   1   4 2593.83   45.75
   2   1   4 2801.99   46.59
   2   1   4 2618.00   46.02
   2   1   4 2652.31   45.61
   2   1   4 2693.09   45.53
   2   1   4 2713.17   45.71
   2   1   5  583.29   12.95
  -2  -1  -5  511.90   12.32
   2   1   5  585.85   13.65
   2   1   5  543.25   12.93
   2   1   5  546.91   13.60
   2   1   5  607.90   13.93
   2   1   5  594.97   13.18
  -2  -1  -5  586.20   13.91
   2   1   6  265.74    8.30
  -2  -1  -6  291.05    9.50
   2   1   6  278.60    8.95
   2   1   6  257.83    8.91
   2   1   6  262.06    7.95
   2   1   6  266.54    8.52
   2   1   7   23.25    2.46
   2   1   7   22.63    2.68
   2   1   7   23.70    2.78
  -2  -1  -7   21.83    2.82
   2   1   7   23.75    2.47
   2   1   8  167.74    7.26
   2   1   8  166.78    6.93
  -2  -1  -8  147.19    6.79
   2   1   8  173.22    7.05
   2   1   8  171.94    6.46
   2   1   8  140.92    5.79
   2   1   9    7.60    1.34
   2   1   9    5.56    1.45
   2   1   9    6.77    1.60
   2   1  10   24.37    1.96
  -2  -1 -10   23.81    2.14
  -2  -2  11   20.40    2.10
   2   2 -11   21.19    2.15
  -2  -2  11   23.19    2.03
  -2  -2  10  228.73    8.43
  -2  -2  10  260.20    8.30
  -2  -2   9   30.85    3.44
  -2  -2   9   30.70    2.95
   2   2  -8  134.80    5.79
  -2  -2   8  168.43    7.64
   2   2  -8  154.06    6.25
  -2  -2   8  151.69    6.29
   2   2  -8  159.03    6.33
  -2  -2   8  170.95    6.88
   2   2  -8  152.41    6.24
  -2  -2   7 1004.59   21.12
   2   2  -7 1056.39   21.99
   2   2  -7 1099.44   22.40
  -2  -2   7 1076.99   22.12
   2   2  -7 1102.61   23.41
   2   2  -7 1007.08   21.11
   2   2  -7 1103.74   22.50
   2   2  -6    0.94    0.95
   2   2  -6    0.81    0.86
  -2  -2   6    2.29    0.99
  -2  -2   6    1.52    0.91
   2   2  -6    1.63    1.01
   2   2  -6    1.06    1.06
   2   2  -6    1.89    1.27
   2   2  -6    1.13    1.09
   2   2  -5  199.93    6.42
  -2  -2   5  177.39    5.68
   2   2  -5  195.55    6.36
   2   2  -5  199.76    6.34
  -2  -2   5  194.27    5.94
   2   2  -5  199.83    6.39
   2   2  -5  177.30    6.84
  -2  -2   5  191.67    6.13
   2   2  -4    1.08    0.88
   2   2  -4    0.49    0.91
  -2  -2   4    0.59    0.69
  -2  -2   4    0.30    0.69
   2   2  -4    0.14    0.83
   2   2  -4    0.93    0.89
  -2  -2   4    0.30    0.76
  -2  -2   4    1.53    0.83
   2   2  -4    0.36    0.94
   2   2  -4    2.18    1.06
   2   2  -4    3.91    0.92
  -2  -2   3    2.43    0.75
   2   2  -3    1.42    1.02
  -2  -2   3    0.61    0.71
   2   2  -3    0.36    0.77
   2   2  -3    0.68    0.79
   2   2  -3    0.63    0.95
   2   2  -3    0.53    0.94
   2   2  -3    0.81    0.80
  -2  -2   2  358.69    8.40
   2   2  -2  374.45    9.15
  -2  -2   2  338.19    6.47
  -2  -2   2  394.86    8.99
  -2  -2   1 2097.64   33.91
   2   2  -1 2186.86   35.12
  -2  -2   0 1507.82   24.49
  -2  -2   0 1311.84   23.51
  -2  -2   0 1220.44   21.41
   2   2   0 1571.84   23.57
   2   2   0 1359.92   22.64
  -2  -2  -1 2091.68   36.93
  -2  -2  -1 2065.67   36.04
  -2  -2  -1 2031.79   34.52
   2   2   1 2172.70   35.63
  -2  -2  -2  153.59    4.82
  -2  -2  -2  161.85    5.69
   2   2   2  151.04    4.92
  -2  -2  -2  170.42    4.40
   2   2   2  136.58    4.39
   2   2   2  139.74    3.43
   2   2   2  171.63    4.95
   2   2   3 4726.32   80.97
  -2  -2  -3 5042.21   80.99
   2   2   3 4640.78   80.98
   2   2   3 5267.96   82.11
   2   2   3 5059.82   81.69
   2   2   3 5439.49   81.84
   2   2   3 5010.59   81.01
   2   2   3 5380.99   81.73
  -2  -2  -3 5042.24   81.60
   2   2   3 4693.16   80.99
   2   2   4   65.22    3.59
   2   2   4   59.19    3.43
   2   2   4   58.54    3.14
   2   2   4   54.79    2.98
  -2  -2  -4   63.73    3.34
  -2  -2  -4   54.59    3.20
   2   2   4   69.64    3.63
   2   2   4   53.42    2.98
   2   2   4   62.93    3.27
   2   2   4   62.20    3.44
   2   2   5  205.18    6.85
  -2  -2  -5  218.22    7.28
   2   2   5  207.35    7.07
   2   2   5  204.08    7.40
   2   2   5  225.14    7.74
   2   2   5  220.90    7.50
   2   2   6    1.43    1.21
   2   2   6    1.11    1.10
   2   2   6    1.78    1.28
   2   2   6    3.24    1.29
   2   2   6    2.21    1.26
   2   2   6    2.02    1.48
  -2  -2  -6    1.60    1.32
   2   2   7   16.24    2.03
   2   2   7   13.51    2.18
   2   2   7   13.16    2.01
  -2  -2  -7   11.46    2.13
   2   2   7   14.99    2.39
   2   2   7   14.75    2.27
   2   2   7   15.88    2.31
   2   2   7   11.95    1.84
   2   2   8    1.14    1.01
   2   2   8    0.59    1.32
   2   2   8    0.33    1.09
  -2  -2  -8    0.24    1.11
   2   2   8    0.46    0.97
   2   2   8    0.83    1.11
  -2  -2  -9   60.47    3.81
   2   2   9   56.55    3.12
  -2  -2 -10   60.61    2.83
   2   2  10   75.59    3.43
  -2  -3  11  107.03    4.18
   2   3 -11  104.11    4.28
   2   3 -10  102.75    5.16
  -2  -3  10  106.42    5.00
  -2  -3   9    0.74    1.21
  -2  -3   9    0.29    1.39
   2   3  -9    1.53    1.56
   2   3  -9    1.02    1.10
  -2  -3   8    4.12    1.53
  -2  -3   8    3.39    1.24
   2   3  -8    3.14    1.65
   2   3  -8    3.11    1.41
  -2  -3   8    2.61    1.65
   2   3  -7 2554.49   45.51
   2   3  -7 2559.91   45.10
  -2  -3   7 2396.86   44.55
  -2  -3   7 2837.16   46.64
  -2  -3   7 2546.64   46.74
   2   3  -7 2630.13   45.25
  -2  -3   7 2406.39   43.77
   2   3  -7 2488.55   46.19
   2   3  -7 2310.47   44.36
  -2  -3   6   48.34    3.30
   2   3  -6   51.16    3.53
  -2  -3   6   47.95    3.56
   2   3  -6   60.47    3.67
   2   3  -6   44.63    3.52
  -2  -3   6   47.72    3.36
   2   3  -6   48.05    3.35
   2   3  -6   57.61    3.61
  -2  -3   5    5.30    1.23
  -2  -3   5    5.25    1.07
   2   3  -5    4.25    1.18
   2   3  -5    3.92    1.24
   2   3  -5    4.98    1.34
  -2  -3   5    8.82    1.50
  -2  -3   5    4.60    1.14
   2   3  -5    5.17    1.52
  -2  -3   5    5.38    1.35
   2   3  -5    5.04    1.24
  -2  -3   4   52.24    2.92
   2   3  -4   53.81    3.26
   2   3  -4   50.76    3.59
   2   3  -4   46.98    2.96
   2   3  -4   51.52    2.80
   2   3  -4   57.08    3.27
  -2  -3   4   53.04    2.99
  -2  -3   4   48.76    2.68
  -2  -3   4   53.60    2.98
  -2  -3   4   53.46    2.75
   2   3  -4   49.71    3.05
  -2  -3   3 2175.34   35.32
  -2  -3   3 2152.70   34.54
   2   3  -3 1896.26   35.74
   2   3  -3 2041.84   35.42
   2   3  -3 2178.33   36.12
   2   3  -3 1844.70   36.87
  -2  -3   3 2061.68   33.60
  -2  -3   3 2025.87   35.13
  -2  -3   3 1969.05   34.73
  -2  -3   3 2117.47   35.25
   2   3  -3 1896.05   35.81
  -2  -3   2 1163.37   20.26
  -2  -3   2 1242.33   20.69
   2   3  -2 1120.69   21.15
  -2  -3   2 1220.14   22.36
  -2  -3   2 1181.00   20.43
   2   3  -2 1047.74   21.20
  -2  -3   2 1084.08   18.84
  -2  -3   2 1100.36   20.36
   2   3  -2  960.30   21.88
  -2  -3   2 1092.14   20.05
   2   3  -2 1140.43   20.98
   2   3  -2 1059.25   21.29
  -2  -3   1  559.87   10.72
  -2  -3   1  459.62    8.84
   2   3  -1  479.39   10.97
  -2  -3   1  486.11   11.03
   2   3  -1  474.16   10.87
  -2  -3   1  463.13   10.15
  -2  -3   1  509.67   11.78
  -2  -3   1  515.24   10.20
   2   3  -1  447.99   10.59
   2   3  -1  479.10   11.01
  -2  -3   0  819.42   14.58
  -2  -3   0  888.38   17.02
  -2  -3   0  904.78   16.47
   2   3   0  918.33   16.36
  -2  -3   0  920.88   16.22
   2   3   0  824.52   16.19
  -2  -3   0  813.20   16.13
  -2  -3   0  866.19   18.30
   2   3   0  804.78   16.02
   2   3   0  756.95   15.06
  -2  -3  -1  706.91   16.00
   2   3   1  650.79   14.64
  -2  -3  -1  693.49   12.84
   2   3   1  648.99   14.42
   2   3   1  780.14   13.88
  -2  -3  -1  756.82   14.54
  -2  -3  -1  760.10   15.11
   2   3   1  732.24   14.52
   2   3   1  641.85   14.62
  -2  -3  -1  656.46   14.09
   2   3   1  724.15   13.71
   2   3   1  697.59   14.29
   2   3   2 1209.02   21.88
  -2  -3  -2 1249.72   22.96
   2   3   2 1205.56   23.00
   2   3   2 1071.89   20.69
  -2  -3  -2 1187.56   21.01
   2   3   2 1200.60   23.04
   2   3   2 1131.90   20.47
   2   3   2 1304.62   22.58
  -2  -3  -2 1203.43   22.61
   2   3   2 1197.91   21.98
   2   3   2 1199.91   23.02
   2   3   2 1283.23   23.00
   2   3   3  328.95    8.36
   2   3   3  337.35    9.15
   2   3   3  306.34    7.77
  -2  -3  -3  319.91    8.07
  -2  -3  -3  334.95    9.06
   2   3   3  330.75    9.06
   2   3   3  316.58    8.57
   2   3   3  315.64    8.60
   2   3   3  319.51    8.67
   2   3   3  345.39    9.28
  -2  -3  -3  363.15    9.66
   2   3   4 1095.56   21.23
   2   3   4  897.71   18.71
   2   3   4  968.30   19.63
   2   3   4 1005.04   20.40
   2   3   4  924.12   18.84
  -2  -3  -4  952.08   19.41
   2   3   4  998.63   20.64
   2   3   4 1005.86   20.47
   2   3   4 1055.62   20.49
   2   3   5  493.05   11.82
   2   3   5  477.56   12.16
   2   3   5  498.28   12.91
   2   3   5  487.28   13.13
   2   3   5  476.35   12.21
   2   3   5  511.69   12.71
   2   3   6   21.19    2.24
   2   3   6   18.95    2.21
  -2  -3  -6   19.15    2.35
   2   3   6   19.90    2.56
  -2  -3  -6   17.94    2.62
   2   3   6   20.41    2.52
   2   3   6   21.58    2.70
   2   3   7  527.81   12.31
   2   3   7  440.37   12.54
   2   3   7  516.99   13.94
   2   3   7  569.31   13.92
  -2  -3  -7  449.82   12.49
   2   3   7  431.30   11.71
  -2  -3  -7  440.81   13.12
   2   3   7  478.45   13.45
   2   3   8   43.58    2.76
   2   3   8   39.30    2.79
  -2  -3  -8   50.25    3.70
   2   3   8   52.18    3.62
   2   3   8   59.38    3.84
  -2  -3  -9  138.18    5.10
   2   3   9  130.65    4.84
   2   4 -10  250.04    7.79
  -2  -4  10  255.13    7.74
   2   4  -9   83.52    4.32
  -2  -4   9   81.33    4.88
   2   4  -9   91.09    5.03
  -2  -4   9   93.37    4.96
  -2  -4   8  185.14    7.15
  -2  -4   8  191.54    7.85
   2   4  -8  199.34    8.03
  -2  -4   8  200.09    7.80
   2   4  -8  197.85    7.51
  -2  -4   7  360.48   11.37
   2   4  -7  401.58   10.91
   2   4  -7  363.21   10.92
   2   4  -7  368.29   11.59
  -2  -4   7  377.26   11.02
   2   4  -7  383.51   11.40
   2   4  -7  397.53   10.90
  -2  -4   6  511.46   13.37
   2   4  -6  524.24   13.70
   2   4  -6  539.92   13.86
  -2  -4   6  535.33   13.60
   2   4  -6  477.82   12.73
  -2  -4   6  492.46   12.57
  -2  -4   6  570.53   13.76
   2   4  -6  466.05   12.66
  -2  -4   5  671.11   15.24
   2   4  -5  700.02   16.05
   2   4  -5  735.04   16.14
  -2  -4   5  668.23   15.06
   2   4  -5  676.32   15.34
  -2  -4   5  561.06   12.44
   2   4  -5  589.00   13.84
   2   4  -5  675.52   15.41
  -2  -4   5  698.82   15.29
  -2  -4   5  651.22   14.75
  -2  -4   4  295.84    8.50
   2   4  -4  325.36    9.33
  -2  -4   4  290.71    8.29
   2   4  -4  314.30    9.05
  -2  -4   4  302.31    8.62
   2   4  -4  327.43    9.25
  -2  -4   4  259.97    6.58
  -2  -4   4  296.25    8.33
   2   4  -4  280.39    8.17
  -2  -4   4  281.44    7.79
   2   4  -4  318.18    9.11
  -2  -4   3 4083.35   65.63
  -2  -4   3 3788.69   63.25
  -2  -4   3 3756.29   64.66
   2   4  -3 3958.81   66.61
  -2  -4   3 3966.55   65.29
  -2  -4   3 4174.49   65.56
   2   4  -3 3859.91   65.76
   2   4  -3 4329.12   66.94
  -2  -4   3 3831.23   63.43
   2   4  -3 3964.01   66.70
   2   4  -2 2686.69   47.46
  -2  -4   2 2864.20   46.29
  -2  -4   2 2641.82   44.70
  -2  -4   2 2898.60   45.40
   2   4  -2 2659.03   47.47
  -2  -4   2 2809.22   44.50
  -2  -4   2 2797.63   46.04
  -2  -4   2 2817.73   46.10
   2   4  -2 2680.37   46.87
  -2  -4   1 1396.03   24.49
  -2  -4   1 1370.13   25.80
   2   4  -1 1244.16   23.80
  -2  -4   1 1306.83   22.72
   2   4  -1 1427.16   25.34
   2   4  -1 1229.92   25.13
   2   4  -1 1305.50   24.92
  -2  -4   1 1438.28   24.43
  -2  -4   1 1375.41   24.25
   2   4  -1 1242.79   25.25
   2   4  -1 1215.87   23.56
   2   4   0  303.89    7.78
  -2  -4   0  336.57    8.21
  -2  -4   0  301.79    8.01
   2   4   0  292.03    8.00
  -2  -4   0  304.01    6.91
   2   4   0  306.41    8.24
  -2  -4   0  326.18    9.22
   2   4   0  284.47    7.80
  -2  -4  -1  188.42    5.18
   2   4   1  185.37    6.76
  -2  -4  -1  191.86    6.15
  -2  -4  -1  199.53    7.08
   2   4   1  178.72    6.22
   2   4   1  193.65    5.83
  -2  -4  -1  213.46    6.37
   2   4   1  199.48    6.60
   2   4   1  188.12    6.83
  -2  -4  -2  775.83   17.20
   2   4   2  794.26   15.55
   2   4   2  811.84   18.30
   2   4   2  860.02   17.95
  -2  -4  -2  796.98   15.87
   2   4   2  804.80   16.39
  -2  -4  -2  869.71   17.64
  -2  -4  -2  884.42   17.64
   2   4   2  840.36   17.54
   2   4   2  837.24   18.49
   2   4   2  841.36   17.73
   2   4   3    3.41    1.31
  -2  -4  -3    3.31    1.25
   2   4   3    3.78    1.13
   2   4   3    3.89    1.40
   2   4   3    4.54    1.46
  -2  -4  -3    8.99    1.76
   2   4   3    3.74    1.23
   2   4   3    2.83    1.24
  -2  -4  -4  280.20    8.14
   2   4   4  295.86    9.47
   2   4   4  270.83    8.14
   2   4   4  278.00    8.76
   2   4   4  291.87    9.47
   2   4   4  300.85    9.54
  -2  -4  -5  303.13    9.79
   2   4   5  377.90   10.97
   2   4   5  379.04   11.31
   2   4   5  364.82   11.35
   2   4   5  352.02   10.82
  -2  -4  -5  346.15    9.81
   2   4   5  309.30   10.16
   2   4   5  374.53   10.94
  -2  -4  -6   77.94    4.50
   2   4   6   89.59    5.05
   2   4   6   88.86    4.69
  -2  -4  -6   78.65    4.29
   2   4   6   82.30    5.12
  -2  -4  -6   80.17    5.06
   2   4   6   74.99    4.60
   2   4   6   87.38    4.67
  -2  -4  -7  670.53   15.13
   2   4   7  650.61   16.19
   2   4   7  630.26   16.02
   2   4   8  347.49    9.67
  -2  -4  -8  334.18    9.24
   2   4   9    0.80    0.69
  -2  -4  -9    0.02    0.64
   2   5 -10  134.08    4.70
  -2  -5  10  125.21    4.67
  -2  -5   9    4.79    1.37
  -2  -5   9    3.38    1.07
  -2  -5   9    4.98    1.26
   2   5  -9    4.14    1.30
   2   5  -9    4.35    1.41
  -2  -5   8  271.97    8.97
   2   5  -8  289.03    9.37
  -2  -5   8  263.31    8.75
   2   5  -8  274.42    9.24
  -2  -5   7   15.63    2.12
  -2  -5   7   17.15    2.40
   2   5  -7   16.45    2.48
   2   5  -7   17.19    2.53
  -2  -5   7   13.75    2.03
   2   5  -7   20.79    2.54
  -2  -5   7   16.11    2.46
   2   5  -6 2868.61   50.35
  -2  -5   6 2798.26   49.92
   2   5  -6 2953.53   50.72
  -2  -5   6 2675.50   48.45
   2   5  -6 2692.72   48.59
  -2  -5   6 2421.61   47.92
  -2  -5   6 2923.21   49.91
   2   5  -6 2699.67   48.66
   2   5  -5  480.47   12.44
   2   5  -5  550.09   14.56
  -2  -5   5  539.40   14.02
  -2  -5   5  483.23   12.49
   2   5  -5  554.27   13.82
   2   5  -5  554.50   14.60
  -2  -5   5  489.81   13.06
  -2  -5   5  594.05   14.03
   2   5  -5  538.64   13.74
  -2  -5   4  679.08   16.18
  -2  -5   4  631.22   14.72
   2   5  -4  714.06   16.65
   2   5  -4  646.89   15.60
   2   5  -4  743.97   17.08
  -2  -5   4  680.02   15.86
  -2  -5   4  728.60   16.04
   2   5  -4  717.72   16.73
  -2  -5   3   72.30    4.04
  -2  -5   3   62.20    3.10
   2   5  -3   67.37    4.23
  -2  -5   3   77.25    4.08
  -2  -5   3   68.04    3.76
   2   5  -3   66.14    3.99
   2   5  -3   70.89    4.28
   2   5  -3   68.70    4.32
   2   5  -2  724.84   16.79
  -2  -5   2  730.56   16.02
   2   5  -2  679.15   16.10
   2   5  -2  740.16   17.23
  -2  -5   2  686.77   15.69
  -2  -5   2  760.19   15.86
   2   5  -2  698.96   16.41
   2   5  -2  745.70   17.36
   2   5  -1  821.01   17.15
  -2  -5   1  890.80   18.45
   2   5  -1  869.20   18.41
   2   5  -1  946.95   20.14
   2   5  -1  792.35   17.50
  -2  -5   1  849.46   16.64
   2   5  -1  919.62   19.16
  -2  -5   1  908.17   18.38
  -2  -5   1  944.60   18.55
   2   5  -1  879.73   19.09
   2   5  -1  946.08   20.23
   2   5   0  319.61    8.76
   2   5   0  352.09   10.56
   2   5   0  322.78    8.79
   2   5   0  312.87    9.08
   2   5   0  328.71    9.36
  -2  -5   0  347.76    9.17
   2   5   0  347.61   10.56
  -2  -5   0  351.27    9.30
  -2  -5   0  321.47    7.94
  -2  -5  -1 1318.60   25.28
   2   5   1 1246.68   25.78
  -2  -5  -1 1259.64   23.77
   2   5   1 1296.72   24.81
  -2  -5  -1 1339.23   25.44
   2   5   1 1331.05   26.40
   2   5   1 1289.01   25.30
   2   5   2    6.67    1.65
  -2  -5  -2    9.48    1.67
   2   5   2    5.43    1.03
   2   5   2    6.99    1.80
  -2  -5  -2    6.17    1.21
  -2  -5  -2    6.91    1.51
  -2  -5  -2    6.40    1.59
   2   5   2   12.18    1.97
   2   5   2    6.68    1.77
   2   5   3   93.30    4.29
  -2  -5  -3  109.57    5.10
   2   5   3  107.31    5.65
   2   5   3  112.16    5.89
  -2  -5  -3  103.10    4.49
  -2  -5  -3  125.88    5.56
   2   5   3  109.24    5.33
   2   5   3  113.80    5.96
   2   5   3  115.02    5.69
  -2  -5  -4  429.89   11.68
   2   5   4  496.25   13.57
  -2  -5  -4  419.60   10.83
   2   5   4  438.78   11.65
   2   5   4  488.32   13.55
   2   5   4  384.76   10.79
   2   5   4  463.86   13.20
   2   5   4  445.70   12.88
   2   5   5    0.61    1.46
  -2  -5  -5    0.12    1.01
   2   5   5    0.04    0.85
   2   5   5    1.18    1.27
  -2  -5  -5    0.37    0.92
   2   5   5    0.16    1.16
  -2  -5  -6    2.03    1.05
   2   5   6   -0.20    0.88
   2   5   6    1.72    1.15
  -2  -5  -6    0.69    1.33
   2   5   6    0.61    1.39
   2   5   6    0.58    0.98
   2   5   7   23.11    2.55
  -2  -5  -7   25.81    2.50
   2   5   8   27.17    2.08
  -2  -5  -8   32.93    2.24
   2   5   8   34.44    2.48
   2   6  -9  299.72    7.87
   2   6  -9  302.29    7.61
  -2  -6   9  289.27    8.07
  -2  -6   8    3.08    1.29
  -2  -6   8    3.96    1.33
   2   6  -8    2.90    1.18
   2   6  -8    3.99    1.47
  -2  -6   7   15.50    2.29
   2   6  -7   20.13    2.64
   2   6  -7   16.56    2.25
  -2  -6   6   62.69    4.40
   2   6  -6   73.52    4.85
   2   6  -6   66.08    3.98
   2   6  -6   68.42    4.72
  -2  -6   6   69.61    4.53
  -2  -6   6   62.50    4.05
   2   6  -6   57.74    4.01
   2   6  -6   64.36    3.93
  -2  -6   5  267.08    9.48
   2   6  -5  245.41    8.28
   2   6  -5  290.25   10.15
   2   6  -5  276.82    9.13
   2   6  -5  274.91   10.02
  -2  -6   5  274.47    9.10
  -2  -6   5  277.27    9.21
   2   6  -5  277.91    9.19
  -2  -6   4   15.73    2.38
   2   6  -4   15.99    2.35
   2   6  -4   16.78    2.29
   2   6  -4   16.21    2.53
  -2  -6   4   18.05    2.32
   2   6  -4   17.51    2.47
  -2  -6   4   16.98    2.40
  -2  -6   3  116.05    5.62
   2   6  -3  117.54    5.95
   2   6  -3  117.90    6.09
  -2  -6   3  118.28    5.66
   2   6  -3  116.24    5.77
   2   6  -3  118.41    6.12
  -2  -6   2    7.64    1.73
   2   6  -2    9.35    2.12
   2   6  -2    8.59    1.95
  -2  -6   2    6.99    1.67
   2   6  -2    7.76    1.83
   2   6  -2    8.64    1.91
   2   6  -2   10.29    2.18
   2   6  -1   92.89    5.50
   2   6  -1   78.50    4.41
   2   6  -1   93.29    5.43
   2   6  -1   73.55    4.00
   2   6  -1   80.53    4.69
   2   6  -1   89.45    5.08
  -2  -6   1   87.35    4.64
  -2  -6   0  200.53    7.09
   2   6   0  202.56    6.82
   2   6   0  219.50    8.60
   2   6   0  200.93    7.34
   2   6   0  197.51    7.28
   2   6   0  219.47    8.67
  -2  -6   0  224.24    7.67
   2   6   0  217.37    8.13
   2   6   0  193.48    6.65
  -2  -6  -1   23.68    2.48
   2   6   1   27.09    2.82
   2   6   1   26.23    2.44
  -2  -6  -1   29.92    2.87
   2   6   1   29.81    3.12
  -2  -6  -2  401.86   11.05
   2   6   2  397.73   11.48
   2   6   2  449.49   13.48
   2   6   2  394.90   12.01
  -2  -6  -2  420.88   11.91
   2   6   2  434.47   12.43
   2   6   2  452.04   13.55
   2   6   3    5.90    1.67
  -2  -6  -3    7.48    1.59
   2   6   3    5.30    1.84
   2   6   3    4.68    1.81
   2   6   3    4.58    1.61
  -2  -6  -3    8.34    1.95
   2   6   3    4.42    1.80
  -2  -6  -4  423.05   11.12
   2   6   4  456.30   13.26
   2   6   4  438.88   13.00
   2   6   4  413.09   11.46
   2   6   4  445.93   13.22
   2   6   4  438.64   12.52
  -2  -6  -5   61.59    3.36
   2   6   5   68.05    4.39
  -2  -6  -5   60.16    3.96
   2   6   5   69.94    4.46
   2   6   5   67.13    4.31
  -2  -6  -6  103.22    4.76
   2   6   6  103.42    4.66
   2   6   6   93.30    5.07
   2   6   6  102.24    5.07
  -2  -6  -6  100.27    4.68
   2   6   6  100.17    4.64
  -2  -6  -7   76.28    3.50
   2   6   7   67.37    3.58
  -2  -6  -7   65.22    3.22
   2   6   7   68.61    3.56
  -2  -7   8    3.15    1.04
   2   7  -8    2.74    1.12
  -2  -7   7  150.89    6.23
  -2  -7   7  142.96    5.41
  -2  -7   6   74.46    4.58
   2   7  -6   84.68    4.92
  -2  -7   6   71.79    4.19
  -2  -7   5    6.89    1.89
   2   7  -5    7.66    1.60
   2   7  -5    7.35    1.88
  -2  -7   5    9.03    1.90
   2   7  -5    8.72    1.56
   2   7  -5    6.86    1.54
  -2  -7   4  124.44    6.24
   2   7  -4  143.80    6.75
   2   7  -4  135.78    6.32
   2   7  -4  134.37    6.08
  -2  -7   4  131.65    6.10
   2   7  -4  135.99    6.37
  -2  -7   3  479.91   13.59
   2   7  -3  518.16   14.17
   2   7  -3  512.48   14.16
   2   7  -3  556.28   14.88
  -2  -7   3  517.72   13.91
   2   7  -3  491.54   14.41
   2   7  -3  555.12   14.97
   2   7  -2   83.35    4.88
   2   7  -2   99.81    5.84
   2   7  -2   95.01    5.77
   2   7  -2   89.23    5.35
  -2  -7   2   84.60    5.03
   2   7  -2   94.48    5.51
  -2  -7   1  162.47    6.82
   2   7  -1  173.53    6.76
   2   7  -1  171.73    7.29
   2   7  -1  195.70    8.39
  -2  -7   1  173.51    7.16
   2   7  -1  192.26    8.02
   2   7  -1  192.35    8.39
  -2  -7   0  240.54    8.41
   2   7   0  295.25   10.47
   2   7   0  237.45    8.33
   2   7   0  244.30    8.58
  -2  -7   0  277.38    9.12
   2   7   0  283.93    9.94
   2   7   0  294.67   10.56
  -2  -7  -1  555.41   14.13
   2   7   1  679.23   17.25
   2   7   1  562.66   14.78
  -2  -7  -1  570.01   14.43
  -2  -7  -1  598.12   14.99
   2   7   1  543.85   13.53
   2   7   1  662.27   17.19
  -2  -7  -2  169.04    6.43
  -2  -7  -2  177.89    6.78
   2   7   2  179.55    7.48
   2   7   2  171.08    7.29
  -2  -7  -2  184.89    7.26
   2   7   2  164.07    6.50
   2   7   3   33.69    3.44
  -2  -7  -3   39.45    3.07
   2   7   3   29.21    3.07
   2   7   3   32.44    3.02
   2   7   3   33.38    3.43
  -2  -7  -3   28.03    2.46
   2   7   3   30.92    2.85
  -2  -7  -4 1497.03   28.47
   2   7   4 1709.74   31.90
   2   7   4 1577.47   31.42
  -2  -7  -4 1642.38   30.13
   2   7   4 1703.79   32.02
   2   7   4 1489.75   29.21
   2   7   4 1585.22   30.25
   2   7   5 1050.32   20.62
   2   7   5  918.55   20.63
  -2  -7  -5  992.91   19.66
  -2  -7  -5  964.71   19.85
   2   7   5 1011.30   20.53
   2   7   5  911.40   19.71
  -2  -7  -6   10.60    1.32
  -2  -7  -6   10.16    1.41
   2   7   6    9.31    1.43
   2   8  -7   73.09    3.49
  -2  -8   7   51.43    2.88
  -2  -8   6    7.23    1.50
  -2  -8   6    6.53    1.36
  -2  -8   6    7.14    1.40
  -2  -8   5    8.62    1.57
  -2  -8   5    8.69    1.79
   2   8  -5    9.05    1.40
  -2  -8   5    7.73    1.59
   2   8  -5    9.79    1.91
   2   8  -5    7.80    1.35
  -2  -8   4   70.82    4.35
   2   8  -4   74.37    4.15
  -2  -8   4   72.39    4.21
  -2  -8   4   63.32    3.86
   2   8  -4   68.94    3.96
   2   8  -4   80.02    4.53
   2   8  -4   69.33    4.05
   2   8  -3  349.67   10.31
   2   8  -3  381.07   11.07
  -2  -8   3  323.72    9.79
  -2  -8   3  336.17   10.50
   2   8  -3  358.94   10.78
   2   8  -3  377.42   11.10
  -2  -8   2  141.29    6.35
   2   8  -2  158.40    6.23
   2   8  -2  182.26    7.51
   2   8  -2  169.06    7.31
  -2  -8   2  162.50    6.83
  -2  -8   2  148.26    6.14
   2   8  -2  173.34    7.20
  -2  -8   1   12.49    2.02
   2   8  -1   14.63    1.80
   2   8  -1   17.43    2.61
   2   8  -1   17.49    2.58
  -2  -8   1   15.62    2.29
  -2  -8   1   14.49    1.99
   2   8  -1   17.33    2.55
  -2  -8   0  167.91    6.59
   2   8   0  189.10    8.19
  -2  -8   0  172.57    7.08
  -2  -8   0  165.79    6.37
   2   8   0  208.72    8.03
   2   8   0  195.52    8.27
   2   8   1  313.52   10.44
  -2  -8  -1  279.61    8.95
  -2  -8  -1  249.61    8.12
  -2  -8  -1  252.93    8.15
   2   8   1  306.04   10.42
  -2  -8  -2  300.88    8.51
   2   8   2  303.06    9.42
  -2  -8  -2  329.94    9.52
  -2  -8  -2  317.00    8.85
   2   8   2  319.56    9.73
   2   8   3  168.02    6.74
   2   8   3  142.54    5.06
  -2  -8  -3  138.63    4.85
   2   8   3  172.60    6.72
   2   8   3  149.86    5.66
  -2  -8  -3  154.83    5.48
   2   8   4    0.64    0.70
   2   8   4    1.31    0.99
   2   8   4    1.34    0.99
  -2  -8  -4    0.96    0.95
   2   8   4    0.59    0.92
  -2  -8  -4    0.44    0.71
   2   8   5   18.45    1.79
  -2  -8  -5   19.20    1.64
   2   9  -5   24.27    1.95
  -2  -9   5   17.88    1.58
   2   9  -4  146.49    4.97
   2   9  -4  135.02    4.45
  -2  -9   3  169.01    6.08
   2   9  -3  186.58    6.10
   2   9  -3  177.82    5.49
   2   9  -3  180.05    5.92
  -2  -9   3  170.90    6.03
   2   9  -3  175.35    5.90
   2   9  -2  379.75   10.00
   2   9  -2  390.31   10.23
  -2  -9   2  370.65    9.86
   2   9  -2  369.18    9.94
  -2  -9   1    3.44    1.12
   2   9  -1    3.76    1.26
  -2  -9   1    2.50    0.98
  -2  -9   1    2.42    1.22
   2   9  -1    2.80    1.26
   2   9  -1    3.70    1.23
  -2  -9   0   37.94    2.56
   2   9   0   43.95    3.26
  -2  -9   0   40.31    2.95
  -2  -9   0   34.96    2.41
   2   9   0   43.91    3.11
   2   9   0   46.05    3.35
  -2  -9  -1  156.12    5.15
  -2  -9  -1  151.54    4.95
   2   9   1  189.40    6.65
   2   9   1  168.35    5.96
  -2  -9  -1  170.41    5.96
   2   9   1  182.90    6.61
  -2  -9  -2  500.28   10.76
   2   9   2  542.10   11.69
  -3   9   4   18.52    1.77
  -3   9   4   18.94    1.69
  -3   9   4   18.76    1.81
  -3   9   3  102.47    4.32
  -3   9   3  103.63    4.13
   3  -9  -3   97.04    3.90
  -3   9   3   98.69    4.28
  -3   9   2  258.17    7.34
  -3   9   2  271.57    7.30
  -3   9   2  284.76    8.46
   3  -9  -2  246.73    7.33
  -3   9   2  257.62    7.36
   3  -9  -1    8.25    1.38
  -3   9   1    6.06    1.51
   3  -9  -1    7.36    1.43
  -3   9   0  325.60    9.18
   3  -9   0  278.02    8.42
  -3   9  -1  149.94    5.55
   3  -9   1  153.32    5.74
   3  -9   2   95.72    4.46
  -3   9  -2  104.78    4.16
   3  -9   2  104.95    4.58
   3  -9   3  551.90   12.56
   3  -9   3  618.27   12.85
  -3   9  -4   11.28    1.63
   3  -9   4   10.23    1.44
   3  -9   4    7.64    1.42
   3  -9   5    2.69    0.98
  -3   9  -5    3.90    1.02
   3  -9   5    5.35    1.02
  -3   8   6   23.05    2.18
  -3   8   6   19.98    1.82
  -3   8   6   23.01    2.20
  -3   8   5    0.04    1.01
  -3   8   5    0.17    1.03
  -3   8   5    0.11    0.88
  -3   8   5    0.10    0.85
   3  -8  -5    0.82    0.88
  -3   8   4  484.60   13.00
  -3   8   4  487.74   12.66
   3  -8  -4  448.65   11.69
  -3   8   4  490.09   12.30
  -3   8   4  495.63   13.13
  -3   8   3   74.77    4.61
  -3   8   3   76.78    4.31
   3  -8  -3   73.27    4.22
  -3   8   3   76.05    4.64
   3  -8  -3   76.83    3.55
  -3   8   2   85.32    4.74
  -3   8   2   90.54    4.60
   3  -8  -2   83.29    4.23
   3  -8  -2   88.05    4.71
  -3   8   2   85.79    4.78
   3  -8  -1   48.71    3.27
  -3   8   1   42.59    3.19
   3  -8  -1   40.59    3.51
  -3   8   1   47.68    4.36
   3  -8  -1   46.01    3.45
  -3   8   1   42.95    3.21
   3  -8  -1   36.04    2.78
  -3   8   0  336.29   10.33
  -3   8   0  314.36   11.78
  -3   8   0  295.87    8.46
   3  -8   0  301.52   10.19
   3  -8   0  312.24    9.76
   3  -8   0  328.02    9.56
   3  -8   1   81.38    4.68
   3  -8   1   83.38    5.08
   3  -8   1  102.87    4.93
  -3   8  -1   86.27    4.85
   3  -8   1  101.58    5.15
  -3   8  -2  328.99   11.67
   3  -8   2  300.26   10.39
   3  -8   2  298.78    9.95
  -3   8  -2  310.68    9.21
   3  -8   2  334.37   10.08
   3  -8   3  692.28   15.30
   3  -8   3  601.23   15.14
   3  -8   4    1.33    0.98
   3  -8   4    1.27    1.38
   3  -8   4    1.13    1.20
   3  -8   4    1.55    1.11
   3  -8   5   35.26    2.66
   3  -8   5   39.43    3.20
   3  -8   5   44.95    3.09
   3  -8   6  179.07    6.00
   3  -8   6  225.50    6.58
   3  -7  -7   17.11    1.68
  -3   7   7   16.06    1.71
  -3   7   7   15.58    1.64
   3  -7  -6  326.36   10.39
   3  -7  -6  318.65    9.11
  -3   7   6  331.94    8.90
  -3   7   6  327.63    8.95
   3  -7  -6  325.32   10.34
  -3   7   5   84.03    4.22
  -3   7   5   89.60    4.84
   3  -7  -5   86.17    4.59
   3  -7  -4    5.92    1.74
  -3   7   4    6.39    1.37
  -3   7   4    7.08    1.72
   3  -7  -4    7.14    1.87
   3  -7  -4    5.74    1.55
   3  -7  -4    4.89    1.71
   3  -7  -4    5.37    1.58
   3  -7  -3    6.43    1.70
   3  -7  -3    5.73    2.01
   3  -7  -3    7.19    1.79
  -3   7   3    6.91    1.71
  -3   7   3    7.55    2.17
   3  -7  -3    7.55    1.84
   3  -7  -3    7.09    1.47
  -3   7   2  740.81   21.61
   3  -7  -2  744.92   17.19
   3  -7  -2  783.41   18.36
  -3   7   1  101.93    5.17
  -3   7   1  113.41    5.26
   3  -7  -1  111.92    5.19
   3  -7  -1   88.91    4.52
   3  -7  -1  109.98    5.57
  -3   7   1   99.80    5.18
  -3   7   1  107.47    7.27
  -3   7   0    1.67    1.16
   3  -7   0    1.37    1.25
   3  -7   0    2.41    1.61
   3  -7   0    1.32    1.40
   3  -7   0    2.08    1.33
   3  -7   1 3780.71   66.39
  -3   7  -1 3922.94   71.20
   3  -7   1 3874.01   65.68
   3  -7   1 3964.09   65.08
   3  -7   1 3909.66   65.87
   3  -7   2 2470.10   49.65
   3  -7   2 3208.06   51.58
   3  -7   2 2597.41   51.71
   3  -7   2 3150.69   52.35
  -3   7  -2 3095.38   56.27
   3  -7   2 2998.06   52.57
  -3   7  -3  179.60    8.63
   3  -7   3  195.03    8.03
   3  -7   3  201.94    7.72
   3  -7   4  106.06    5.55
   3  -7   4  114.81    6.34
   3  -7   4  132.68    5.80
  -3   7  -4  114.19    6.37
   3  -7   4  137.96    6.23
   3  -7   4  114.12    6.04
   3  -7   5   21.71    2.66
   3  -7   5   24.47    3.01
   3  -7   5   23.60    2.45
   3  -7   5   30.37    2.94
   3  -7   6    1.15    1.24
   3  -7   6    0.62    1.23
  -3   7  -6   -0.04    0.95
   3  -7   7    9.40    1.60
   3  -6  -8   -0.15    0.88
  -3   6   8    1.31    0.88
  -3   6   8    1.32    0.80
   3  -6  -8    0.27    0.88
   3  -6  -8    0.03    0.79
   3  -6  -7   38.48    3.43
   3  -6  -7   36.06    3.33
  -3   6   7   37.44    2.84
   3  -6  -7   35.22    2.87
   3  -6  -6  491.36   12.88
   3  -6  -6  493.68   14.16
  -3   6   6  467.97   12.63
   3  -6  -6  445.28   12.29
  -3   6   6  462.38   12.52
   3  -6  -6  496.51   14.16
   3  -6  -5  279.53    9.27
   3  -6  -5  302.52    9.71
   3  -6  -5  301.68    9.90
  -3   6   5  307.85    9.50
   3  -6  -4   98.56    5.73
  -3   6   4   88.36    6.07
  -3   6   4  108.96    5.44
   3  -6  -4   89.31    4.28
   3  -6  -4   97.85    5.16
   3  -6  -4   91.62    5.30
  -3   6   4   87.40    4.62
   3  -6  -4   93.77    5.03
   3  -6  -4  101.84    5.80
   3  -6  -3 1030.35   20.92
   3  -6  -3  938.41   22.24
  -3   6   3 1070.35   22.13
   3  -6  -3 1007.78   21.68
   3  -6  -3 1044.90   21.94
  -3   6   3  976.89   20.45
   3  -6  -3  973.66   22.07
   3  -6  -3  975.02   22.32
   3  -6  -2    0.57    1.05
   3  -6  -2   -0.10    1.18
   3  -6  -2    1.38    1.24
   3  -6  -2    2.08    1.36
   3  -6  -2    2.01    1.42
   3  -6  -2   -0.08    1.04
   3  -6  -1  248.67    7.96
   3  -6  -1  237.72    7.94
   3  -6  -1  262.84    8.57
   3  -6  -1  237.93    7.92
   3  -6   0   19.86    2.32
   3  -6   0   18.26    2.20
   3  -6   0   21.86    2.55
   3  -6   1  578.31   14.23
   3  -6   1  619.72   15.77
   3  -6   1  746.93   16.03
  -3   6  -1  705.28   20.13
   3  -6   1  705.85   16.24
   3  -6   1  705.02   16.11
   3  -6   2  208.76    7.54
  -3   6  -2  237.70   10.61
   3  -6   2  219.13    8.34
   3  -6   2  241.41    8.34
   3  -6   3   19.13    2.49
  -3   6  -3   15.02    2.92
   3  -6   3   18.02    2.26
   3  -6   3   17.00    2.46
   3  -6   4  229.48    8.74
   3  -6   4  257.79    9.23
  -3   6  -4  237.22    9.66
   3  -6   4  243.49    9.36
   3  -6   4  241.37    8.14
   3  -6   5   45.89    3.94
  -3   6  -5   41.13    3.58
   3  -6   5   37.10    3.83
   3  -6   5   46.76    3.82
   3  -6   5   41.27    3.12
  -3   6  -6  294.50    9.01
  -3   6  -6  277.66   12.10
   3  -6   7  243.35    8.61
   3  -6   7  244.06    8.01
   3  -6   8   23.52    2.35
   3  -5  -9  170.40    6.07
   3  -5  -9  164.69    5.63
   3  -5  -9  167.31    6.04
  -3   5   8  368.95    9.74
   3  -5  -8  387.90   11.73
   3  -5  -8  407.28   10.86
  -3   5   8  413.76   11.08
   3  -5  -8  388.77   11.72
  -3   5   7   25.09    2.52
   3  -5  -7   25.85    3.17
   3  -5  -7   23.62    2.50
   3  -5  -7   24.54    2.74
  -3   5   7   24.63    2.68
   3  -5  -7   24.10    3.08
   3  -5  -6  379.70   12.41
  -3   5   6  339.65   10.34
   3  -5  -6  338.90   10.21
   3  -5  -6  331.09   10.18
  -3   5   6  337.76   10.58
   3  -5  -6  355.29   10.69
   3  -5  -6  379.73   12.40
   3  -5  -5   46.97    3.54
   3  -5  -5   45.50    3.35
   3  -5  -5   36.35    2.69
   3  -5  -5   39.23    3.29
   3  -5  -4  192.83    8.13
   3  -5  -4  222.03    7.57
   3  -5  -4  207.65    6.99
  -3   5   4  218.85    7.50
   3  -5  -4  229.83    7.82
   3  -5  -4  214.27    7.87
   3  -5  -4  195.66    6.98
   3  -5  -4  191.93    8.11
   3  -5  -3   10.90    1.96
   3  -5  -3   10.31    1.75
   3  -5  -3    9.90    1.64
   3  -5  -3   11.66    1.84
   3  -5  -3   10.29    1.71
   3  -5  -3   12.02    2.06
  -3   5   3   10.71    1.61
   3  -5  -3   10.59    1.98
   3  -5  -2  101.59    4.99
   3  -5  -2  105.28    4.88
   3  -5  -2  110.76    4.95
   3  -5  -2  110.51    5.01
   3  -5  -2  108.92    4.80
   3  -5  -2  108.68    5.21
  -3   5   2   96.92    4.18
   3  -5  -2  106.41    5.08
   3  -5  -1  144.96    5.68
   3  -5  -1  176.22    6.26
   3  -5  -1  168.66    6.01
   3  -5  -1  158.38    6.05
   3  -5  -1  137.40    5.03
   3  -5  -1  158.46    6.11
   3  -5  -1  154.98    5.93
   3  -5  -1  144.72    5.70
   3  -5   0  250.06    7.85
   3  -5   0  284.10    8.44
   3  -5   0  245.04    7.21
   3  -5   0  277.95    8.30
   3  -5   0  240.69    7.45
   3  -5   0  261.02    8.15
   3  -5   0  277.91    8.07
   3  -5   0  287.60    8.47
   3  -5   0  248.62    7.23
   3  -5   1   68.44    3.51
   3  -5   1   68.84    3.91
   3  -5   1   77.07    4.15
   3  -5   1   73.45    3.94
   3  -5   1   73.31    3.82
   3  -5   2  183.95    6.66
  -3   5  -2  194.32    9.00
   3  -5   2  177.25    6.39
   3  -5   2  188.76    7.11
  -3   5  -3    1.63    1.72
   3  -5   3    0.93    0.86
   3  -5   3    0.83    0.95
   3  -5   4 1603.84   31.20
   3  -5   4 1684.63   31.89
   3  -5   4 1455.26   28.73
  -3   5  -4 1433.65   31.95
   3  -5   5 1077.45   23.55
   3  -5   5 1020.69   19.47
  -3   5  -5  949.40   22.05
   3  -5   5 1045.71   23.47
   3  -5   5  986.72   22.06
   3  -5   5 1022.18   20.91
   3  -5   6    9.50    2.28
  -3   5  -6    8.07    2.63
   3  -5   6    5.31    1.16
   3  -5   6   10.82    1.97
   3  -5   7   62.41    3.23
   3  -5   7   71.75    4.72
  -3   5  -7   62.46    5.30
   3  -5   7   62.47    3.99
   3  -5   8   15.09    2.18
   3  -5   8   18.04    2.33
   3  -5   8   10.64    1.33
   3  -5   9   13.33    1.70
   3  -5   9   12.47    1.67
   3  -4 -10  112.05    4.20
  -3   4  10  123.60    4.32
   3  -4  -9  571.08   14.55
   3  -4  -9  594.48   13.88
   3  -4  -9  567.52   14.45
   3  -4  -8    4.86    1.69
  -3   4   8    1.69    1.33
   3  -4  -8    4.32    1.75
  -3   4   8    1.96    0.92
   3  -4  -8    2.74    1.48
  -3   4   7   89.43    4.95
   3  -4  -7  103.25    6.08
   3  -4  -7   97.89    5.95
  -3   4   7   89.10    4.58
   3  -4  -7   92.25    4.75
   3  -4  -7   99.99    5.31
  -3   4   7  102.33    5.38
   3  -4  -6  340.06   11.33
  -3   4   6  306.08    9.39
  -3   4   6  281.20    9.20
   3  -4  -6  294.39    9.03
   3  -4  -6  276.09    8.78
  -3   4   6  321.11   10.04
   3  -4  -6  320.10    9.92
   3  -4  -6  340.71   11.38
   3  -4  -5   16.33    2.54
  -3   4   5   15.47    1.92
  -3   4   5   15.45    2.08
   3  -4  -5   14.41    1.75
   3  -4  -5   19.12    2.16
   3  -4  -5   16.43    2.00
   3  -4  -5   17.04    2.21
   3  -4  -5   12.09    1.86
   3  -4  -5   16.81    2.54
  -3   4   4  136.08    5.12
   3  -4  -4  150.01    5.68
   3  -4  -4  154.40    5.69
   3  -4  -4  137.16    5.48
  -3   4   4  143.98    5.80
   3  -4  -4  153.35    5.89
   3  -4  -4  147.89    5.81
   3  -4  -3   22.24    2.11
   3  -4  -3   22.35    2.03
   3  -4  -3   25.36    2.30
   3  -4  -3   25.33    2.54
   3  -4  -3   25.12    2.24
   3  -4  -3   25.92    2.25
   3  -4  -3   20.29    2.24
   3  -4  -3   21.55    2.22
  -3   4   3   22.21    2.07
   3  -4  -3   24.97    2.53
   3  -4  -2 1817.98   33.30
   3  -4  -2 1989.68   32.66
  -3   4   2 1699.44   31.39
   3  -4  -2 1783.11   33.60
   3  -4  -2 1904.54   33.12
   3  -4  -2 1939.39   33.53
   3  -4  -2 1881.36   33.73
  -3   4   2 1817.56   32.59
   3  -4  -2 2025.58   33.74
   3  -4  -2 1783.94   33.63
   3  -4  -1 1039.19   19.15
   3  -4  -1 1019.50   17.24
  -3   4   1  829.93   16.36
   3  -4  -1  871.98   18.25
   3  -4  -1 1039.57   19.10
   3  -4  -1  941.69   18.45
   3  -4  -1  879.32   18.31
   3  -4   0   27.97    1.21
   3  -4   0   22.97    1.80
   3  -4   0   26.30    2.19
   3  -4   0   29.59    2.26
   3  -4   0   29.38    2.26
   3  -4   0   27.52    1.32
   3  -4   0   29.71    2.47
   3  -4   0   25.24    1.97
   3  -4   0   28.41    2.35
   3  -4   0   22.39    1.78
   3  -4   1    0.77    0.75
   3  -4   1    0.43    0.72
   3  -4   1    0.45    0.78
   3  -4   1    1.48    1.04
   3  -4   1    0.25    0.87
   3  -4   2 1859.47   32.13
   3  -4   2 1694.35   31.32
   3  -4   2 1813.80   31.70
   3  -4   2 1791.98   32.42
   3  -4   2 1711.90   31.84
   3  -4   2 1748.84   30.65
   3  -4   2 1659.40   30.87
   3  -4   2 1795.67   32.28
   3  -4   3  375.43   10.08
   3  -4   3  396.38   10.56
   3  -4   3  370.26    8.59
   3  -4   3  379.46   10.53
   3  -4   3  357.68    9.31
  -3   4  -3  355.82   12.13
  -3   4  -4 1292.60   28.15
   3  -4   4 1284.21   27.08
   3  -4   4 1263.91   24.66
   3  -4   4 1266.09   25.82
   3  -4   5  234.92    8.58
   3  -4   5  225.88    7.12
   3  -4   5  198.51    6.50
   3  -4   5  198.73    7.38
   3  -4   5  196.87    6.49
   3  -4   6    6.70    1.40
  -3   4  -6    5.16    2.41
   3  -4   6    5.86    1.47
   3  -4   6    4.28    1.49
   3  -4   7 1984.29   35.80
  -3   4  -7 1694.60   37.13
   3  -4   7 1924.73   33.66
   3  -4   7 1844.31   35.33
   3  -4   7 1530.54   32.64
   3  -4   7 1658.90   32.28
   3  -4   8  601.76   14.84
   3  -4   8  593.36   14.68
   3  -4   8  597.03   13.61
   3  -4   9   34.27    2.71
   3  -4   9   33.98    2.36
  -3   4  -9   36.38    2.55
   3  -4   9   36.87    2.84
   3  -3 -10   24.62    2.17
  -3   3  10   28.69    2.22
   3  -3 -10   25.27    2.31
   3  -3 -10   25.54    2.20
   3  -3  -9  108.15    5.31
   3  -3  -9  108.25    5.62
  -3   3   9  105.51    5.07
   3  -3  -9  109.02    5.62
   3  -3  -8  278.91    9.22
   3  -3  -8  284.86   10.07
  -3   3   8  231.97    7.22
   3  -3  -8  227.71    7.69
  -3   3   8  255.83    9.05
   3  -3  -8  285.59   10.08
   3  -3  -7   87.48    4.45
   3  -3  -7   94.50    5.71
  -3   3   7   87.21    4.33
  -3   3   7   91.13    5.09
   3  -3  -7   98.61    5.27
   3  -3  -7   88.98    5.59
   3  -3  -6  175.36    7.66
  -3   3   6  177.75    6.87
  -3   3   6  166.84    6.35
   3  -3  -6  177.67    6.31
   3  -3  -6  170.71    6.27
   3  -3  -6  190.06    7.13
   3  -3  -6  169.19    6.06
  -3   3   6  181.11    7.02
   3  -3  -6  176.19    7.69
   3  -3  -5    1.69    1.26
  -3   3   5    2.20    1.16
  -3   3   5    1.90    0.98
   3  -3  -5    1.57    0.90
   3  -3  -5    2.84    1.41
   3  -3  -5    4.43    1.15
   3  -3  -5    1.82    1.15
   3  -3  -5    1.21    0.98
   3  -3  -5    2.25    1.12
   3  -3  -4   34.52    2.68
   3  -3  -4   39.29    2.80
   3  -3  -4   32.49    2.41
  -3   3   4   33.52    2.40
   3  -3  -4   36.37    2.62
   3  -3  -4   33.94    2.37
   3  -3  -4   34.70    2.64
   3  -3  -4   33.25    2.66
   3  -3  -3 8028.31  127.37
   3  -3  -3 8118.47  126.95
  -3   3   3 7956.61  126.23
   3  -3  -3 7627.81  127.85
   3  -3  -3 8025.05  127.13
  -3   3   3 7789.93  126.69
   3  -3  -3 8105.84  126.96
   3  -3  -3 7852.99  127.06
   3  -3  -3 7769.95  127.93
   3  -3  -2 1182.10   20.32
  -3   3   2 1142.02   20.16
   3  -3  -2 1054.47   21.11
   3  -3  -2 1025.91   20.72
   3  -3  -2 1131.38   20.41
   3  -3  -2 1159.89   21.12
   3  -3  -2 1080.25   20.84
  -3   3   2 1059.80   19.88
   3  -3  -2 1118.69   21.08
   3  -3  -2 1062.83   21.14
   3  -3  -1    0.20    0.73
   3  -3  -1    0.75    0.46
  -3   3   1    0.88    0.45
   3  -3  -1    0.86    0.75
   3  -3  -1    1.16    0.96
   3  -3  -1    0.69    0.77
   3  -3  -1    0.36    0.86
  -3   3   1    0.56    0.59
   3  -3  -1    0.89    0.90
  -3   3   0 5407.57   88.47
   3  -3   0 5395.65   89.59
   3  -3   0 5535.84   89.57
   3  -3   1  807.37   15.02
   3  -3   1  762.11   14.83
   3  -3   1  807.46   15.40
   3  -3   1  785.26   15.30
   3  -3   1  742.28   15.34
   3  -3   1  755.23   14.90
   3  -3   1  814.06   15.62
   3  -3   2   65.74    2.27
   3  -3   2   61.44    3.13
   3  -3   2   60.20    2.64
   3  -3   2   66.92    3.30
   3  -3   2   56.21    2.83
   3  -3   2   59.77    2.71
   3  -3   2   64.36    3.32
   3  -3   2   61.76    3.09
   3  -3   2   61.52    2.71
   3  -3   2   67.97    3.19
   3  -3   3 3468.12   57.19
   3  -3   3 3442.88   57.30
   3  -3   3 3442.90   56.02
   3  -3   3 3276.58   56.29
   3  -3   3 3251.76   55.44
   3  -3   3 3480.32   55.93
   3  -3   3 3243.95   54.86
   3  -3   3 3453.81   57.46
   3  -3   4  523.30   12.70
   3  -3   4  514.01   11.53
   3  -3   4  478.33   11.98
   3  -3   4  473.80    9.71
   3  -3   4  435.94   10.15
   3  -3   4  497.49   12.40
  -3   3  -4  443.34   12.62
   3  -3   4  441.27   10.47
   3  -3   4  453.63   11.28
   3  -3   5  885.90   18.63
   3  -3   5  850.80   18.96
   3  -3   6  687.92   16.71
   3  -3   6  708.90   15.99
   3  -3   6  547.89   14.32
   3  -3   6  601.07   14.52
  -3   3  -6  637.22   18.11
   3  -3   7  450.15   12.29
   3  -3   7  436.31   12.76
  -3   3  -7  394.56   13.54
   3  -3   7  407.95   12.30
   3  -3   7  374.76   10.89
   3  -3   8  306.71    9.81
   3  -3   8  315.90    9.78
   3  -3   8  264.93    8.53
  -3   3  -8  280.56   10.61
  -3   3  -8  291.85    9.23
   3  -3   8  303.87    9.84
   3  -3   9  238.26    7.52
   3  -3   9  241.04    7.46
   3  -3   9  252.03    7.95
  -3   3  -9  207.30    6.65
   3  -3   9  204.70    6.50
   3  -3  10  126.85    4.21
   3  -3  10  127.04    4.38
   3  -2 -11   61.84    2.98
   3  -2 -10   56.68    3.46
   3  -2 -10   56.84    3.60
  -3   2  10   54.37    3.12
   3  -2 -10   54.58    3.41
  -3   2   9  589.70   14.40
   3  -2  -9  638.35   16.14
  -3   2   9  638.63   16.09
   3  -2  -9  661.15   15.85
  -3   2   9  633.92   15.10
   3  -2  -9  623.21   16.07
   3  -2  -8 3728.65   64.04
  -3   2   8 3555.02   62.82
   3  -2  -8 3588.82   62.45
  -3   2   8 3552.52   61.97
   3  -2  -8 3698.10   64.02
  -3   2   7 5233.78   90.24
   3  -2  -7 6082.87   93.54
   3  -2  -7 4989.51   89.19
  -3   2   7 5854.22   92.12
  -3   2   7 5078.23   88.64
   3  -2  -7 5131.33   89.32
   3  -2  -7 5917.92   91.52
  -3   2   7 5635.50   91.28
   3  -2  -7 5953.92   93.44
   3  -2  -6    0.58    1.21
   3  -2  -6    0.35    0.76
  -3   2   6    0.26    0.96
   3  -2  -6    0.21    1.20
  -3   2   6    0.86    0.89
   3  -2  -6    0.84    1.19
   3  -2  -6    0.30    0.74
   3  -2  -6    1.83    1.10
   3  -2  -6    0.36    0.87
   3  -2  -5    8.09    1.69
   3  -2  -5    6.61    1.27
   3  -2  -5    7.18    1.65
   3  -2  -5    6.57    1.26
  -3   2   5    5.71    1.14
   3  -2  -5    4.83    1.25
  -3   2   5    6.37    1.35
   3  -2  -5    4.85    1.17
   3  -2  -5    6.16    1.35
   3  -2  -4  276.41    8.85
  -3   2   4  272.32    7.30
  -3   2   4  314.83    8.21
   3  -2  -4  278.67    8.52
   3  -2  -4  280.40    7.83
   3  -2  -4  324.06    7.57
   3  -2  -4  302.41    8.02
   3  -2  -4  271.21    7.77
   3  -2  -4  300.80    7.99
   3  -2  -4  279.13    8.56
   3  -2  -4  313.57    8.64
   3  -2  -3  586.45   12.65
   3  -2  -3  575.85   12.53
  -3   2   3  607.10   12.61
   3  -2  -3  576.38   13.14
   3  -2  -3  579.83   12.64
   3  -2  -3  606.62   11.77
   3  -2  -3  603.59   12.76
   3  -2  -3  635.06   12.77
   3  -2  -3  590.57   12.66
   3  -2  -3  579.36   13.17
  -3   2   3  583.73   12.59
  -3   2   2  103.05    3.76
   3  -2  -2   83.02    3.69
   3  -2  -2  109.04    4.00
   3  -2  -2  107.49    3.38
   3  -2  -2  100.79    3.72
   3  -2  -2  105.17    4.00
   3  -2  -2  106.56    3.81
   3  -2  -2  111.34    4.02
   3  -2  -2   78.74    3.63
   3  -2  -2  112.73    3.67
   3  -2  -1  368.33    8.46
  -3   2   1  358.33    8.39
   3  -2  -1  364.83    8.18
   3  -2  -1  354.61    7.53
   3  -2   0 1483.51   24.91
   3  -2   0 1392.63   25.71
   3  -2   0 1540.76   25.78
   3  -2   0 1445.81   25.74
   3  -2   0 1507.59   25.21
   3  -2   1 2962.17   47.56
   3  -2   1 3070.90   48.37
   3  -2   1 3034.31   48.61
   3  -2   1 2896.57   48.16
   3  -2   2  583.23   12.75
   3  -2   2  619.20   12.40
   3  -2   2  631.26   12.66
   3  -2   2  604.97   12.21
   3  -2   2  639.72   12.31
   3  -2   2  620.00   12.45
   3  -2   2  608.97   12.76
   3  -2   2  568.22   12.14
   3  -2   2  645.95   11.86
   3  -2   3 1631.77   30.53
   3  -2   3 1734.16   30.28
   3  -2   3 1741.04   29.12
   3  -2   3 1747.81   30.13
   3  -2   3 1679.82   29.07
   3  -2   3 1858.04   30.94
   3  -2   3 1714.98   29.61
   3  -2   3 1761.73   29.05
   3  -2   4 3167.20   53.44
   3  -2   4 3301.34   53.03
   3  -2   4 2950.45   50.61
   3  -2   4 2940.39   51.55
   3  -2   4 2972.86   51.88
   3  -2   4 3390.53   51.79
   3  -2   5  350.17   10.41
   3  -2   5  360.09    9.99
  -3   2  -5  337.17   11.31
   3  -2   5  334.67    9.10
   3  -2   5  358.48    8.88
   3  -2   6   42.61    3.51
   3  -2   6   41.46    3.47
  -3   2  -6   36.05    3.81
   3  -2   6   42.44    3.46
   3  -2   6   30.29    2.59
   3  -2   6   34.91    2.87
   3  -2   6   34.41    2.59
   3  -2   7 3109.94   55.04
   3  -2   7 3349.01   57.84
  -3   2  -7 3243.92   59.65
  -3   2  -7 3043.77   56.34
   3  -2   7 3287.13   57.81
   3  -2   7 3149.19   56.51
   3  -2   8   68.57    4.36
  -3   2  -8   60.65    4.76
  -3   2  -8   57.32    3.78
   3  -2   8   71.61    4.56
   3  -2   8   60.48    3.91
   3  -2   9   15.62    1.98
   3  -2   9   15.45    2.12
   3  -2   9   15.70    1.84
   3  -2  10  300.03    7.30
   3  -2  10  282.69    7.57
   3  -1 -11    6.13    1.25
   3  -1 -10    8.62    1.60
  -3   1  10   12.52    1.77
   3  -1 -10    9.49    1.64
   3  -1 -10   10.56    1.84
  -3   1  10    9.12    1.39
  -3   1   9  547.72   14.24
   3  -1  -9  559.53   14.67
   3  -1  -9  551.56   14.28
  -3   1   9  559.98   12.99
  -3   1   9  534.19   13.48
   3  -1  -9  552.54   14.65
  -3   1   8  284.78    9.71
   3  -1  -8  329.50   10.67
  -3   1   8  298.94   10.15
   3  -1  -8  289.28    9.74
  -3   1   8  293.57    8.67
  -3   1   8  277.92    9.15
   3  -1  -8  322.30   10.60
  -3   1   7  312.39    8.85
  -3   1   7  311.48    9.75
   3  -1  -7  338.13   10.68
   3  -1  -7  288.60    8.87
  -3   1   7  337.25   10.20
  -3   1   7  314.46    9.54
   3  -1  -7  330.61   10.65
   3  -1  -6  977.56   20.07
  -3   1   6 1008.54   20.80
   3  -1  -6  984.40   20.40
   3  -1  -6  995.81   21.95
   3  -1  -6  981.20   19.53
  -3   1   6  970.37   19.26
   3  -1  -6 1024.18   22.14
   3  -1  -5    1.35    1.12
   3  -1  -5    1.08    1.16
  -3   1   5    0.42    0.92
   3  -1  -5    1.80    1.14
  -3   1   5    0.92    0.83
   3  -1  -5    0.31    0.85
   3  -1  -5    2.25    0.96
   3  -1  -5    0.31    0.94
   3  -1  -5    0.44    0.74
   3  -1  -5    1.24    0.98
   3  -1  -5   -0.10    0.89
   3  -1  -4 1038.21   21.80
  -3   1   4 1056.63   20.28
  -3   1   4 1139.58   21.17
   3  -1  -4 1030.07   20.44
   3  -1  -4  982.86   19.87
   3  -1  -4 1142.39   19.41
   3  -1  -4 1086.15   20.57
   3  -1  -4 1207.22   21.06
   3  -1  -4 1008.78   20.27
   3  -1  -4 1093.32   21.20
   3  -1  -3 3309.50   54.06
  -3   1   3 3258.34   53.33
  -3   1   3 3053.16   52.67
   3  -1  -3 3196.84   53.19
   3  -1  -3 3309.79   51.60
  -3   1   3 3215.08   53.28
   3  -1  -3 3219.14   53.30
   3  -1  -3 3505.98   53.10
   3  -1  -3 2963.84   52.48
   3  -1  -3 3160.25   53.16
   3  -1  -3 3114.57   53.33
  -3   1   2 2220.30   37.22
   3  -1  -2 2142.89   36.32
   3  -1  -2 2371.16   37.00
   3  -1  -2 2063.40   34.99
  -3   1   2 2154.86   36.13
   3  -1  -2 2200.38   36.84
   3  -1  -2 2116.87   36.40
   3  -1  -2 2251.17   36.94
  -3   1   1  103.70    2.95
   3  -1  -1   98.72    2.70
   3  -1  -1  116.91    3.85
   3  -1  -1  115.39    3.21
  -3   1   1   97.09    3.96
   3  -1   0  426.92    8.33
   3  -1   0  388.00    7.64
  -3   1   0  364.73    6.81
   3  -1   0  450.26    8.93
   3  -1   2  813.96   16.68
   3  -1   2  866.72   16.61
   3  -1   2  913.60   16.61
   3  -1   2  911.29   16.32
   3  -1   2  813.71   16.53
   3  -1   2  902.87   16.00
   3  -1   2  885.35   16.33
   3  -1   3  706.16   14.82
   3  -1   3  690.55   14.84
  -3   1  -3  728.51   15.90
   3  -1   3  718.58   14.09
   3  -1   3  734.54   13.16
   3  -1   3  749.67   14.33
  -3   1  -4  492.31   12.75
   3  -1   4  492.60   11.79
   3  -1   4  499.83   11.01
   3  -1   4  467.14   10.35
   3  -1   4  480.33   10.84
   3  -1   4  462.88    9.91
   3  -1   5 1067.35   21.30
  -3   1  -5 1054.97   22.30
   3  -1   5 1057.53   20.30
   3  -1   5 1050.36   20.33
   3  -1   6   16.41    2.33
   3  -1   6   18.46    2.39
  -3   1  -6   15.05    1.97
   3  -1   6   17.74    2.39
  -3   1  -6   15.81    2.58
   3  -1   6   12.97    1.86
   3  -1   6   13.38    1.91
   3  -1   7 1062.34   22.85
  -3   1  -7 1054.63   24.16
   3  -1   7 1066.29   23.19
   3  -1   7 1058.89   22.28
   3  -1   8  196.75    7.37
   3  -1   8  220.24    8.18
  -3   1  -8  192.84    8.07
   3  -1   8  204.38    7.78
   3  -1   8  176.46    6.78
   3  -1   8  178.34    7.14
   3  -1   9    2.06    1.07
   3  -1   9    2.42    1.10
   3  -1   9    3.82    1.40
   3  -1   9    3.21    1.41
   3  -1  10  187.72    5.24
   3  -1  10  180.60    5.72
   3  -1  10  180.01    5.65
   3  -1  10  179.87    5.31
  -3   0  11   18.31    1.83
   3   0 -11   19.41    1.93
  -3   0  10  229.77    7.00
  -3   0  10  234.75    8.05
  -3   0   9  637.89   16.23
   3   0  -9  643.83   15.82
  -3   0   9  612.88   15.77
  -3   0   9  674.94   15.05
   3   0  -9  640.49   15.83
  -3   0   8  384.45   11.66
   3   0  -8  325.05    9.66
   3   0  -8  375.98   11.47
  -3   0   8  362.78   11.29
   3   0  -8  318.53    9.03
  -3   0   8  384.68   10.39
  -3   0   8  346.67   10.06
   3   0  -8  377.63   11.51
   3   0  -7   57.96    4.11
  -3   0   7   57.42    3.98
   3   0  -7   52.62    3.51
   3   0  -7   61.42    4.18
   3   0  -7   49.92    2.99
   3   0  -7   48.84    3.13
   3   0  -7   59.76    4.12
  -3   0   7   52.70    3.35
  -3   0   7   54.06    3.48
  -3   0   6  101.71    4.93
   3   0  -6  101.15    4.69
   3   0  -6  110.69    5.36
   3   0  -6   92.68    3.81
  -3   0   6   95.80    4.17
   3   0  -6   97.23    4.43
   3   0  -6  105.86    5.15
   3   0  -6  105.98    5.31
  -3   0   5   37.90    2.71
   3   0  -5   35.93    2.62
   3   0  -5   35.12    2.84
   3   0  -5   38.95    2.14
   3   0  -5   38.98    2.64
   3   0  -5   38.30    3.05
  -3   0   5   35.16    2.24
   3   0  -5   33.56    2.31
   3   0  -5   37.44    2.95
   3   0  -4 1232.60   22.80
  -3   0   4 1152.15   21.64
  -3   0   4 1298.26   22.30
   3   0  -4 1176.48   21.89
   3   0  -4 1072.30   22.09
   3   0  -4 1125.86   21.57
   3   0  -4 1130.95   19.72
   3   0  -4 1046.55   20.49
   3   0  -4 1273.35   22.00
   3   0  -4 1177.78   22.55
   3   0  -4 1104.32   21.44
   3   0  -4 1078.80   22.16
   3   0  -3 6153.70   94.60
   3   0  -3 5791.62   94.06
  -3   0   3 5901.09   94.39
   3   0  -3 5906.71   94.08
  -3   0   2  111.11    4.36
   3   0  -2  118.98    3.99
  -3   0   2  109.75    3.72
   3   0  -2  112.28    4.07
   3   0  -2  108.53    3.86
  -3   0   1   10.70    1.03
   3   0  -1   10.17    1.13
   3   0  -1    9.68    1.11
   3   0   0   42.21    2.05
  -3   0   0   35.68    1.59
   3   0   0   41.29    2.08
  -3   0   0   43.09    1.74
   3   0   1  725.30   14.22
  -3   0  -1  668.72   12.95
  -3   0  -1  741.85   14.02
   3   0   1  837.98   14.25
  -3   0  -1  844.89   13.47
   3   0   2    3.43    0.85
   3   0   2    3.22    0.99
  -3   0  -2    3.17    0.51
  -3   0  -2    3.79    1.11
   3   0   2    5.02    0.77
   3   0   2    6.05    1.15
   3   0   2    3.40    0.99
   3   0   2    3.31    0.97
  -3   0  -3 5332.21   87.42
   3   0   3 5568.71   89.96
  -3   0  -3 5716.70   90.31
   3   0   3 6046.06   90.03
   3   0   3 5306.61   86.89
   3   0   3 5963.96   90.34
   3   0   3 5473.97   89.18
   3   0   3 5786.93   89.19
   3   0   4 2433.19   41.78
   3   0   4 2419.31   41.11
   3   0   4 2341.14   41.63
  -3   0  -4 2352.16   42.14
   3   0   4 2514.77   41.73
   3   0   4 2271.16   41.00
   3   0   4 2284.33   40.43
   3   0   5  155.08    6.10
   3   0   5  148.51    6.13
  -3   0  -5  158.31    6.62
   3   0   5  151.07    5.44
   3   0   5  143.72    6.19
   3   0   5  166.00    6.16
   3   0   5  151.30    5.89
   3   0   5  143.72    5.21
   3   0   6  128.92    5.86
   3   0   6  140.70    6.25
  -3   0  -6  130.20    6.26
   3   0   6  117.58    5.47
   3   0   6  137.94    6.25
   3   0   6  132.20    5.83
   3   0   6  111.58    4.59
   3   0   6  126.01    4.88
   3   0   7  671.23   16.39
   3   0   7  689.96   17.07
   3   0   7  702.11   16.74
  -3   0  -7  680.08   17.26
   3   0   7  694.36   17.04
   3   0   7  654.09   16.20
   3   0   8    0.18    1.09
   3   0   8    0.91    1.20
   3   0   8    1.17    1.20
  -3   0  -8    0.83    1.28
   3   0   8    3.10    1.51
   3   0   8    1.19    1.46
   3   0   9   70.12    3.64
   3   0   9   73.59    4.08
   3   0   9   71.59    3.99
   3   0   9   68.78    3.91
   3   0  10   40.53    2.36
  -3   0 -10   35.10    2.51
   3   0  10   41.18    2.35
  -3  -1  11    0.16    0.83
  -3  -1  10  348.29    9.52
  -3  -1  10  361.06   10.72
  -3  -1   9  253.65    9.40
   3   1  -9  268.90    8.95
   3   1  -9  262.94    8.88
   3   1  -9  254.81    9.11
  -3  -1   9  270.65    8.63
   3   1  -8   10.02    1.98
  -3  -1   8    7.18    1.44
  -3  -1   8    8.74    1.88
   3   1  -8   11.44    2.06
  -3  -1   8    9.73    2.18
  -3  -1   8    9.12    1.73
   3   1  -8   10.25    2.13
   3   1  -8    8.94    1.80
  -3  -1   7   63.06    4.29
   3   1  -7   60.11    3.84
   3   1  -7   65.24    4.26
  -3  -1   7   63.87    4.05
   3   1  -7   54.68    2.98
   3   1  -7   58.39    3.57
   3   1  -7   66.47    4.23
  -3  -1   7   63.00    3.80
  -3  -1   7   54.29    3.42
   3   1  -7   59.55    4.11
  -3  -1   6  332.65    9.11
  -3  -1   6  367.33   10.18
   3   1  -6  329.78    9.54
  -3  -1   6  344.00    9.73
   3   1  -6  309.10    9.84
   3   1  -6  298.15    7.79
   3   1  -6  344.85    9.78
   3   1  -6  311.80    9.90
  -3  -1   5 1860.70   32.42
   3   1  -5 1856.96   32.38
   3   1  -5 1894.44   32.30
   3   1  -5 1742.80   32.73
   3   1  -5 1746.86   31.88
   3   1  -5 1630.17   29.48
  -3  -1   5 1789.10   31.31
   3   1  -5 1684.24   31.11
   3   1  -5 1736.55   32.75
   3   1  -4   18.17    1.84
  -3  -1   4   17.05    1.76
  -3  -1   4   17.50    1.81
   3   1  -4   16.07    1.80
   3   1  -4   17.15    1.89
   3   1  -4   17.00    1.01
   3   1  -4   17.57    1.87
   3   1  -4   17.53    1.73
   3   1  -4   15.62    1.61
   3   1  -4   17.23    1.91
  -3  -1   3 3643.71   59.19
   3   1  -3 3546.90   58.64
   3   1  -3 3641.27   58.96
   3   1  -3 3603.74   58.60
   3   1  -3 3446.71   59.21
   3   1  -3 3562.42   58.35
   3   1  -3 3601.33   58.96
   3   1  -2 1630.45   29.09
   3   1  -2 1832.39   29.63
   3   1  -2 1625.08   29.40
   3   1  -2 1564.55   28.93
   3   1  -2 1661.64   30.03
   3   1  -2 1867.71   29.66
   3   1  -2 1598.60   29.22
   3   1  -2 1650.02   29.48
  -3  -1   2 1753.26   29.93
   3   1  -1   51.01    2.49
   3   1  -1   43.67    2.21
   3   1  -1   40.90    2.11
   3   1  -1   48.03    2.47
   3   1  -1   44.23    2.44
  -3  -1   1   49.20    2.48
  -3  -1   0 2109.73   35.88
   3   1   0 2265.97   36.48
   3   1   0 2047.04   35.94
   3   1   0 2425.33   36.45
   3   1   0 2052.14   35.86
   3   1   0 1871.12   36.12
   3   1   0 2311.67   36.75
  -3  -1   0 2225.92   36.39
   3   1   1 1366.94   22.69
   3   1   1 1254.92   23.06
   3   1   1 1262.35   23.16
  -3  -1  -1 1325.40   21.71
   3   1   1 1309.28   23.98
  -3  -1  -1 1443.57   23.60
  -3  -1  -1 1193.15   22.57
   3   1   1 1288.31   23.40
  -3  -1  -2  336.42    7.77
   3   1   2  298.74    8.23
  -3  -1  -2  372.51    8.42
   3   1   2  325.88    7.09
   3   1   2  359.28    8.40
  -3  -1  -2  385.35    8.00
   3   1   2  358.74    8.54
   3   1   2  310.48    8.09
   3   1   2  392.05    8.67
   3   1   3 1457.91   26.80
  -3  -1  -3 1564.62   26.72
   3   1   3 1525.52   26.95
   3   1   3 1593.55   27.59
  -3  -1  -3 1322.90   25.38
   3   1   3 1542.05   27.10
   3   1   3 1332.99   26.92
   3   1   3 1357.01   26.36
   3   1   3 1561.29   26.86
   3   1   4  377.59    9.83
   3   1   4  338.19    9.35
   3   1   4  355.82    9.58
  -3  -1  -4  332.67    9.38
   3   1   4  350.65    9.62
   3   1   4  319.97    9.00
   3   1   4  359.06    9.33
   3   1   5  482.55   12.59
   3   1   5  518.53   13.05
  -3  -1  -5  532.35   13.17
   3   1   5  509.23   12.84
   3   1   5  551.20   13.59
   3   1   5  465.05   12.50
   3   1   5  510.93   12.55
   3   1   6  520.96   13.40
   3   1   6  525.13   13.64
  -3  -1  -6  503.79   13.52
   3   1   6  511.63   12.76
   3   1   6  553.78   14.18
   3   1   6  482.46   13.13
   3   1   6  516.92   13.02
   3   1   7  556.67   13.75
   3   1   7  536.58   14.06
   3   1   7  527.60   12.89
   3   1   7  569.55   14.53
   3   1   7  575.64   14.65
   3   1   7  539.45   13.89
   3   1   8   24.03    2.45
   3   1   8   23.96    2.49
   3   1   8   23.18    2.75
   3   1   8   22.90    2.60
   3   1   8   22.15    2.47
   3   1   9    0.84    0.92
   3   1   9    0.34    0.76
   3   1   9    0.86    0.86
  -3  -1  -9    0.87    1.08
  -3  -2  11   13.57    1.66
   3   2 -11   11.30    1.44
  -3  -2  11   10.44    1.23
  -3  -2  10  429.89   11.96
   3   2 -10  428.12   11.47
  -3  -2  10  427.08   10.93
  -3  -2   9  505.38   14.33
   3   2  -9  473.64   12.37
   3   2  -9  533.48   13.15
  -3  -2   9  447.51   12.55
   3   2  -9  517.56   13.75
  -3  -2   9  520.70   13.13
   3   2  -9  531.17   13.17
   3   2  -8  621.83   15.68
  -3  -2   8  665.10   17.58
   3   2  -8  705.37   16.73
  -3  -2   8  599.88   15.71
   3   2  -8  637.74   16.25
  -3  -2   8  695.59   16.17
   3   2  -8  701.55   16.78
   3   2  -7  406.89   11.62
  -3  -2   7  414.02   12.25
   3   2  -7  416.49   12.10
  -3  -2   7  402.46   11.20
  -3  -2   7  434.72   11.57
   3   2  -7  372.25   10.92
   3   2  -7  407.30   11.63
   3   2  -7  415.54   12.16
   3   2  -6  126.02    5.60
  -3  -2   6  128.83    5.48
   3   2  -6  133.08    6.06
   3   2  -6  120.84    5.39
  -3  -2   6  132.87    5.45
   3   2  -6  130.27    5.56
   3   2  -6  138.56    6.18
  -3  -2   5  357.18    8.88
   3   2  -5  376.17    9.99
   3   2  -5  392.68   10.25
   3   2  -5  343.29   10.12
   3   2  -5  393.22   10.13
   3   2  -5  366.98    9.53
  -3  -2   5  377.74    9.60
   3   2  -5  342.55    9.09
   3   2  -5  343.50   10.13
   3   2  -4 1468.02   25.45
  -3  -2   4 1280.20   23.59
   3   2  -4 1284.79   24.29
  -3  -2   4 1456.43   24.89
   3   2  -4 1325.93   24.04
   3   2  -4 1415.35   25.40
   3   2  -4 1189.51   24.90
  -3  -2   4 1262.15   24.12
   3   2  -4 1313.29   24.42
   3   2  -4 1177.69   24.93
  -3  -2   3 1416.82   25.36
   3   2  -3 1393.37   26.27
  -3  -2   3 1447.10   26.51
  -3  -2   3 1471.54   26.36
   3   2  -3 1457.35   27.05
   3   2  -3 1399.60   26.32
  -3  -2   3 1427.92   25.66
   3   2  -3 1449.55   27.08
  -3  -2   2  235.66    6.34
   3   2  -2  252.94    6.66
   3   2  -2  267.95    7.16
   3   2  -2  248.79    7.77
   3   2  -2  226.00    6.25
  -3  -2   2  259.70    6.38
   3   2  -2  267.25    7.22
  -3  -2   2  287.11    7.73
  -3  -2   2  280.89    7.63
   3   2  -1   61.95    2.94
  -3  -2   1   66.33    3.10
   3   2  -1   61.85    2.99
  -3  -2   1   62.49    3.06
   3   2  -1   66.80    3.03
   3   2  -1   63.58    3.21
   3   2  -1   67.22    2.89
   3   2  -1   75.49    3.36
  -3  -2   1   78.25    3.04
  -3  -2   1   74.82    3.49
   3   2  -1   67.70    3.25
   3   2  -1   66.98    3.29
   3   2   0 1135.62   20.33
  -3  -2   0 1049.85   19.93
  -3  -2   0 1062.30   19.56
   3   2   0 1112.75   20.24
   3   2   0  933.26   19.05
   3   2   0 1022.29   19.92
   3   2   0 1193.78   19.99
  -3  -2   0  956.53   19.37
  -3  -2   0 1122.21   20.61
   3   2   0 1103.18   20.26
   3   2   0 1075.15   19.93
   3   2   1   78.78    3.45
   3   2   1   77.25    3.16
  -3  -2  -1   76.12    2.29
   3   2   1   81.29    3.71
   3   2   1   92.08    3.24
  -3  -2  -1   81.79    3.47
  -3  -2  -1   86.16    3.97
  -3  -2  -1   96.83    3.79
  -3  -2  -1   77.72    3.46
   3   2   1   84.24    3.71
   3   2   1   79.31    3.48
   3   2   1   93.21    3.68
   3   2   1   84.27    3.72
  -3  -2  -2  132.58    4.74
   3   2   2  134.81    4.76
   3   2   2  134.78    4.66
   3   2   2  114.95    3.46
   3   2   2  131.42    4.55
  -3  -2  -2  129.05    3.91
   3   2   2  143.17    5.31
  -3  -2  -2  139.68    5.42
   3   2   2  131.29    4.88
   3   2   2  139.03    4.91
   3   2   2  131.01    4.67
   3   2   2  150.37    5.10
   3   2   2  139.03    4.91
   3   2   3  662.37   14.12
   3   2   3  605.01   13.27
   3   2   3  651.90   13.92
  -3  -2  -3  655.91   13.30
   3   2   3  733.31   15.53
   3   2   3  605.09   13.22
  -3  -2  -3  566.76   13.60
   3   2   3  645.89   14.44
   3   2   3  604.75   13.32
   3   2   3  667.91   14.40
   3   2   3  700.77   14.64
   3   2   4  141.17    5.65
   3   2   4  143.71    5.79
   3   2   4  142.47    5.52
  -3  -2  -4  134.65    5.23
   3   2   4  157.05    6.41
   3   2   4  147.82    5.94
   3   2   4  146.38    5.85
   3   2   5   57.26    3.72
   3   2   5   56.40    3.76
  -3  -2  -5   56.12    3.54
   3   2   5   63.80    4.23
   3   2   5   63.69    4.08
   3   2   5   60.25    3.97
   3   2   5   61.74    4.03
   3   2   5   59.98    3.96
   3   2   6  706.99   16.18
   3   2   6  620.13   15.90
  -3  -2  -6  601.96   15.31
   3   2   6  719.18   16.63
   3   2   6  659.54   16.55
   3   2   6  716.39   16.96
   3   2   6  652.04   16.64
   3   2   6  688.70   16.48
   3   2   7  745.59   17.15
   3   2   7  765.67   16.50
   3   2   7  725.79   16.24
  -3  -2  -7  612.82   15.78
   3   2   7  598.21   15.24
   3   2   7  703.51   17.21
   3   2   7  738.80   16.71
   3   2   8    4.37    1.45
   3   2   8    6.10    1.56
   3   2   8    4.57    1.39
   3   2   8    7.33    1.49
  -3  -2  -9    9.03    1.45
   3   2   9   12.91    1.37
  -3  -2  -9   12.17    1.76
  -3  -3  10    1.46    0.98
   3   3 -10    0.95    1.08
   3   3  -9  209.81    7.43
  -3  -3   9  224.86    7.81
   3   3  -9  220.89    7.88
   3   3  -8   18.14    2.42
  -3  -3   8   17.25    2.66
   3   3  -8   15.44    2.18
   3   3  -8   18.54    2.50
  -3  -3   8   19.10    2.42
   3   3  -8   15.98    2.25
   3   3  -7    2.81    1.46
  -3  -3   7    2.59    1.51
  -3  -3   7    1.99    1.01
   3   3  -7    2.63    1.44
  -3  -3   7    3.71    1.48
   3   3  -7    2.38    1.24
   3   3  -7    2.22    1.42
   3   3  -7    2.25    1.67
  -3  -3   6   17.50    2.03
   3   3  -6   21.05    2.56
  -3  -3   6   19.35    2.43
   3   3  -6   22.01    2.54
  -3  -3   6   17.05    1.90
   3   3  -6   18.88    2.31
   3   3  -6   16.06    2.10
  -3  -3   6   19.15    2.30
   3   3  -6   24.02    2.66
  -3  -3   5  910.51   19.10
   3   3  -5  988.66   20.61
  -3  -3   5 1024.14   20.56
  -3  -3   5  983.38   19.27
   3   3  -5  943.06   20.60
   3   3  -5 1031.58   20.70
   3   3  -5  895.32   19.08
  -3  -3   5  981.23   19.82
   3   3  -5  866.89   19.00
   3   3  -5  938.92   20.65
  -3  -3   4 1190.89   22.88
   3   3  -4 1238.85   22.79
  -3  -3   4 1201.13   22.66
  -3  -3   4 1253.05   23.62
   3   3  -4 1139.45   23.99
  -3  -3   4 1218.16   23.21
   3   3  -4 1162.86   23.38
   3   3  -4 1141.02   24.06
   3   3  -4 1327.18   24.50
   3   3  -4 1181.48   22.38
  -3  -3   3  778.67   16.20
   3   3  -3  748.39   15.95
  -3  -3   3  794.64   16.27
   3   3  -3  850.84   17.41
  -3  -3   3  769.69   16.83
   3   3  -3  870.63   17.96
  -3  -3   3  826.80   16.39
   3   3  -3  778.74   16.81
   3   3  -3  864.76   18.00
   3   3  -3  851.40   17.64
  -3  -3   2 1112.97   20.73
   3   3  -2 1047.61   19.78
  -3  -3   2  992.31   19.49
   3   3  -2 1103.29   20.54
   3   3  -2 1051.73   21.02
   3   3  -2  950.80   19.20
  -3  -3   2 1081.41   19.76
  -3  -3   2  977.21   19.16
   3   3  -2 1031.94   20.48
   3   3  -2 1063.15   21.13
   3   3  -1  973.79   19.15
  -3  -3   1 1069.24   19.64
   3   3  -1  971.43   19.28
  -3  -3   1 1068.16   19.18
   3   3  -1 1016.73   18.91
   3   3  -1  924.94   19.09
   3   3  -1 1090.45   20.14
   3   3  -1  965.68   19.83
  -3  -3   1  975.17   18.63
  -3  -3   1  989.95   20.15
  -3  -3   0 3195.10   52.34
   3   3   0 3030.54   50.78
  -3  -3   0 3070.82   52.35
   3   3   0 2999.70   50.72
   3   3   0 3044.57   52.29
   3   3   0 3034.81   50.65
   3   3   0 2862.61   51.68
   3   3   0 3224.09   51.86
  -3  -3   0 3066.20   51.39
  -3  -3   0 3153.71   51.49
   3   3   0 3140.50   52.34
   3   3   0 3062.78   52.38
   3   3   0 3050.80   52.03
   3   3   1 2275.28   40.34
   3   3   1 2064.06   38.46
  -3  -3  -1 2510.66   40.23
   3   3   1 2469.04   40.84
  -3  -3  -1 2236.46   40.48
   3   3   1 2340.18   38.89
  -3  -3  -1 2477.41   40.17
   3   3   1 2370.55   40.40
   3   3   1 2282.91   40.41
   3   3   1 2125.90   39.14
   3   3   1 2207.70   39.89
  -3  -3  -2 1942.60   36.02
   3   3   2 1956.82   35.24
   3   3   2 1988.78   35.76
   3   3   2 1925.47   34.35
   3   3   2 2125.35   36.81
  -3  -3  -2 2072.13   36.08
   3   3   2 1991.77   35.84
  -3  -3  -2 2056.87   36.27
   3   3   2 1998.41   35.69
   3   3   2 1861.07   34.87
   3   3   2 2039.01   36.05
   3   3   3  335.81    9.23
   3   3   3  325.61    9.19
   3   3   3  329.56    8.54
  -3  -3  -3  343.82    9.85
   3   3   3  310.81    8.91
   3   3   3  322.10    9.19
   3   3   3  332.91    9.27
   3   3   3  358.24   10.00
   3   3   4    2.69    1.36
   3   3   4    3.83    1.31
   3   3   4    4.79    1.46
   3   3   4    2.72    1.49
   3   3   4    3.86    1.16
  -3  -3  -4    6.84    1.84
  -3  -3  -4    3.96    1.09
   3   3   4    4.65    1.22
   3   3   4    3.73    1.15
   3   3   5    0.93    0.98
   3   3   5    0.66    1.31
   3   3   5    0.73    1.20
   3   3   5    1.07    1.17
  -3  -3  -5    1.25    1.61
   3   3   6  359.41   10.22
   3   3   6  313.79    9.24
   3   3   6  337.91   10.83
  -3  -3  -6  337.30   11.17
   3   3   6  318.46   10.46
   3   3   6  341.80   10.76
   3   3   7    6.40    1.64
   3   3   7    5.38    1.45
   3   3   7    4.97    1.20
   3   3   7    6.69    1.60
  -3  -3  -8   61.23    3.84
   3   3   8   56.79    2.82
   3   3   8   67.27    3.62
  -3  -3  -9    6.93    1.20
  -3  -3  -9    6.37    1.20
  -3  -4  10    3.71    1.07
  -3  -4  10    2.42    1.04
   3   4 -10    4.15    1.07
   3   4  -9  245.95    7.99
  -3  -4   9  242.98    8.36
   3   4  -9  256.32    8.02
  -3  -4   9  250.82    8.14
   3   4  -8 1054.81   22.79
   3   4  -8 1058.79   22.20
   3   4  -8 1039.29   22.05
  -3  -4   8 1130.37   23.05
   3   4  -8 1068.73   22.28
  -3  -4   7  188.27    7.04
   3   4  -7  204.29    7.97
  -3  -4   7  189.24    7.64
   3   4  -7  209.09    7.96
   3   4  -7  199.81    7.34
   3   4  -7  187.61    7.56
   3   4  -7  215.36    8.07
   3   4  -6    2.89    1.42
  -3  -4   6    5.77    1.63
  -3  -4   6    1.84    1.23
   3   4  -6    2.40    1.43
  -3  -4   6    2.77    1.36
   3   4  -6    2.04    1.33
   3   4  -6    2.38    1.27
   3   4  -6    2.17    1.60
  -3  -4   5    5.20    1.41
   3   4  -5    6.26    1.48
  -3  -4   5    6.32    1.53
  -3  -4   5    4.22    0.94
   3   4  -5    5.60    1.64
  -3  -4   5    4.02    1.29
   3   4  -5    8.13    1.96
   3   4  -5    4.52    1.27
   3   4  -5    4.78    1.59
   3   4  -5    6.09    1.69
  -3  -4   4 2851.49   50.61
  -3  -4   4 3030.65   50.65
  -3  -4   4 2696.19   48.73
   3   4  -4 2912.73   52.16
   3   4  -4 2939.51   51.12
   3   4  -4 3075.87   52.36
  -3  -4   4 2848.60   49.83
  -3  -4   4 3162.83   51.13
   3   4  -4 2917.09   52.26
   3   4  -3   42.13    3.36
  -3  -4   3   44.44    2.94
   3   4  -3   40.63    2.62
  -3  -4   3   38.47    2.39
   3   4  -3   41.24    3.17
  -3  -4   3   44.65    2.77
   3   4  -3   42.31    3.36
  -3  -4   3   45.03    2.80
  -3  -4   3   41.68    2.95
   3   4  -3   41.55    3.16
   3   4  -2  479.69   11.49
  -3  -4   2  482.52   11.46
  -3  -4   2  544.78   12.10
   3   4  -2  499.41   12.20
  -3  -4   2  490.37   11.33
   3   4  -2  481.36   12.95
   3   4  -2  552.59   13.14
   3   4  -2  449.21   11.08
  -3  -4   2  502.17   11.53
   3   4  -2  506.37   12.66
  -3  -4   2  538.37   12.10
   3   4  -2  478.74   13.01
   3   4  -1   10.34    1.57
  -3  -4   1   10.97    1.56
   3   4  -1   11.52    1.67
   3   4  -1   11.40    1.60
   3   4  -1   10.43    1.67
  -3  -4   1   11.47    1.54
   3   4  -1   12.70    1.84
  -3  -4   1   11.95    1.61
  -3  -4   0  426.79   10.86
   3   4   0  381.76    9.57
   3   4   0  389.93   11.17
   3   4   0  414.53   10.84
  -3  -4   0  428.07   10.65
  -3  -4   0  444.38   10.53
   3   4   0  411.66   10.64
   3   4   0  391.56   11.24
   3   4   0  434.33   10.79
  -3  -4  -1   10.50    1.84
   3   4   1   10.17    1.40
   3   4   1   10.66    1.82
   3   4   1   10.37    1.32
  -3  -4  -1   11.18    1.69
   3   4   1   11.53    1.82
  -3  -4  -1   12.28    1.75
   3   4   1   12.42    1.90
   3   4   1   10.29    1.80
   3   4   1   12.31    1.81
   3   4   2  112.12    5.35
   3   4   2   99.31    4.00
   3   4   2  114.65    5.49
  -3  -4  -2  111.79    5.18
  -3  -4  -2  118.36    5.29
   3   4   2  107.66    5.14
   3   4   2  118.29    5.55
   3   4   2  116.72    4.66
   3   4   2  113.72    5.47
  -3  -4  -3  344.00   10.50
   3   4   3  356.46   10.59
   3   4   3  329.72    8.77
   3   4   3  371.04   11.31
  -3  -4  -3  398.93   10.96
  -3  -4  -3  408.75   11.10
   3   4   3  350.45   10.09
   3   4   3  363.60   10.73
   3   4   3  367.49   10.77
  -3  -4  -4  502.35   13.81
   3   4   4  553.40   13.88
   3   4   4  488.26   11.95
  -3  -4  -4  593.18   14.54
  -3  -4  -4  540.66   14.57
   3   4   4  488.79   12.34
   3   4   4  567.44   14.08
   3   4   4  593.87   14.83
  -3  -4  -5   28.72    3.07
   3   4   5   29.93    2.65
   3   4   5   29.74    3.29
  -3  -4  -5   34.94    3.24
  -3  -4  -5   27.38    3.22
   3   4   5   31.07    2.74
   3   4   5   27.52    2.76
  -3  -4  -6  169.60    6.88
   3   4   6  168.52    7.41
  -3  -4  -6  200.94    7.58
   3   4   6  159.99    6.73
   3   4   6  187.73    7.50
  -3  -4  -7   68.30    4.11
   3   4   7   58.71    3.74
   3   4   7   69.87    4.16
  -3  -4  -8  277.45    8.04
   3   4   8  295.45    8.04
  -3  -5  10   10.71    1.32
   3   5  -9   36.70    2.44
   3   5  -9   36.21    2.73
  -3  -5   9   30.48    2.38
  -3  -5   9   35.13    2.69
  -3  -5   8    1.90    1.27
  -3  -5   8    2.06    1.08
  -3  -5   8    2.67    1.20
   3   5  -8    1.27    1.03
   3   5  -8    2.58    1.45
   3   5  -7    4.17    1.41
  -3  -5   7    4.91    1.57
  -3  -5   7    3.27    1.35
   3   5  -7    4.67    1.49
  -3  -5   7    4.40    1.40
   3   5  -7    3.81    1.44
   3   5  -7    3.31    1.22
   3   5  -7    4.68    1.80
  -3  -5   6 1976.26   38.02
   3   5  -6 2081.05   38.99
  -3  -5   6 1895.42   36.99
   3   5  -6 2154.18   39.03
   3   5  -6 1908.84   36.18
  -3  -5   6 2203.93   38.76
   3   5  -6 1918.20   38.78
   3   5  -6 2130.03   38.99
   3   5  -5 1533.86   30.21
  -3  -5   5 1609.16   30.94
  -3  -5   5 1407.48   29.23
   3   5  -5 1605.45   31.66
   3   5  -5 1671.40   32.37
   3   5  -5 1618.25   31.81
  -3  -5   5 1479.87   29.41
  -3  -5   5 1686.52   31.20
  -3  -5   4    4.26    1.44
  -3  -5   4    4.47    1.44
   3   5  -4    4.26    1.64
  -3  -5   4    4.24    1.21
   3   5  -4    3.96    1.64
  -3  -5   4    7.80    1.62
   3   5  -4    4.29    1.73
   3   5  -4    5.79    1.61
   3   5  -4    5.11    1.70
  -3  -5   3   98.71    4.92
   3   5  -3   97.40    5.16
  -3  -5   3   90.77    4.13
   3   5  -3  111.92    5.88
   3   5  -3  102.99    5.28
  -3  -5   3  104.94    4.90
  -3  -5   3  102.68    4.99
   3   5  -3  106.96    5.78
   3   5  -2  290.40    8.25
   3   5  -2  297.95    9.67
  -3  -5   2  312.60    9.13
   3   5  -2  295.91    9.12
  -3  -5   2  260.49    7.57
   3   5  -2  327.22   10.54
  -3  -5   2  305.37    8.80
  -3  -5   2  318.15    9.11
   3   5  -2  306.65    9.77
   3   5  -2  329.70   10.64
  -3  -5   1   46.27    2.85
   3   5  -1   49.70    3.13
  -3  -5   1   53.69    3.53
   3   5  -1   53.76    3.33
  -3  -5   1   52.62    2.79
   3   5  -1   57.81    4.22
   3   5  -1   51.51    3.38
   3   5  -1   55.07    3.78
  -3  -5   1   60.62    3.66
  -3  -5   1   51.33    3.49
   3   5  -1   52.38    3.84
   3   5  -1   57.39    4.23
   3   5   0  153.89    6.10
  -3  -5   0  157.68    6.24
   3   5   0  140.76    5.18
   3   5   0  148.83    6.26
   3   5   0  157.28    6.19
  -3  -5   0  172.92    6.32
  -3  -5   0  157.17    6.25
   3   5   1  380.84   11.52
   3   5   1  361.63   10.96
  -3  -5  -1  405.12   10.73
  -3  -5  -1  371.82   10.57
   3   5   1  363.16   11.06
   3   5   1  382.67   11.63
   3   5   1  364.99   10.52
  -3  -5  -2 1015.70   22.69
   3   5   2 1096.61   23.93
   3   5   2 1077.46   23.81
  -3  -5  -2 1194.49   23.21
  -3  -5  -2 1143.45   22.94
   3   5   2 1047.27   23.32
   3   5   2 1071.69   23.88
   3   5   2 1038.31   22.84
   3   5   3    0.57    1.36
  -3  -5  -3   -0.09    1.19
   3   5   3    0.61    0.81
   3   5   3    3.62    1.48
   3   5   3    0.41    1.32
  -3  -5  -3    0.58    1.35
   3   5   3    2.02    1.29
  -3  -5  -3    1.40    1.27
   3   5   3    2.64    1.47
  -3  -5  -4  100.80    5.18
  -3  -5  -4  106.39    5.51
   3   5   4  105.88    5.47
   3   5   4  105.69    6.06
  -3  -5  -4  103.47    5.57
   3   5   4   89.40    4.51
   3   5   4  105.37    5.51
   3   5   4  109.06    5.86
  -3  -5  -5  801.84   18.40
   3   5   5  835.81   18.62
  -3  -5  -5  915.34   19.62
  -3  -5  -5  884.27   19.46
   3   5   5  804.45   18.61
   3   5   5  870.88   19.99
  -3  -5  -6   23.04    2.22
   3   5   6   20.44    2.56
  -3  -5  -6   25.08    2.56
  -3  -5  -7   22.43    1.72
   3   5   7   23.19    2.19
  -3  -5  -7   29.57    2.37
  -3  -5  -7   27.06    2.31
   3   5   7   25.76    2.34
   3   6  -9   67.36    3.24
  -3  -6   9   55.68    3.02
  -3  -6   8   33.92    2.53
   3   6  -8   40.88    3.06
  -3  -6   8   38.08    2.88
  -3  -6   7   11.70    1.88
   3   6  -7   15.01    2.29
  -3  -6   7   10.58    1.43
   3   6  -7   13.56    1.85
  -3  -6   7   12.51    2.02
   3   6  -7   14.22    1.89
  -3  -6   6  400.14   11.70
   3   6  -6  429.63   12.26
   3   6  -6  422.51   11.75
   3   6  -6  389.91   12.10
  -3  -6   6  425.48   11.79
   3   6  -6  430.19   11.89
  -3  -6   5  948.23   21.21
   3   6  -5  913.30   21.24
   3   6  -5  970.87   22.10
  -3  -6   5  897.59   19.88
   3   6  -5  898.12   20.15
   3   6  -5  915.43   21.30
  -3  -6   4  416.18   12.16
   3   6  -4  426.09   12.45
   3   6  -4  422.69   12.77
  -3  -6   4  394.11   11.43
  -3  -6   4  439.36   12.15
   3   6  -4  421.52   12.22
   3   6  -4  422.44   12.84
  -3  -6   3  367.55   11.05
   3   6  -3  379.05   11.29
   3   6  -3  375.11   12.17
   3   6  -3  358.37   11.63
  -3  -6   3  369.24   10.91
  -3  -6   3  407.86   11.25
   3   6  -3  381.35   11.71
   3   6  -3  376.17   12.24
  -3  -6   2  425.27   12.10
   3   6  -2  410.51   11.75
   3   6  -2  484.78   13.98
   3   6  -2  430.20   12.82
  -3  -6   2  440.32   12.00
  -3  -6   2  454.02   12.07
   3   6  -2  448.86   13.07
   3   6  -2  493.55   14.14
   3   6  -1  165.99    6.19
  -3  -6   1  177.88    7.01
   3   6  -1  171.90    6.40
   3   6  -1  207.28    8.68
   3   6  -1  167.23    6.55
   3   6  -1  178.12    7.25
  -3  -6   1  188.06    7.08
  -3  -6   1  180.13    6.97
   3   6  -1  204.09    8.11
   3   6  -1  206.89    8.71
   3   6   0   69.94    4.19
   3   6   0   69.00    4.33
   3   6   0   71.63    4.23
  -3  -6   0   85.06    4.59
  -3  -6   0   79.07    4.58
   3   6   1    0.91    1.12
   3   6   1    1.67    1.56
   3   6   1    2.13    1.39
  -3  -6  -1    1.72    1.42
   3   6   1    2.01    1.61
  -3  -6  -1    2.65    1.33
   3   6   1    1.51    1.61
  -3  -6  -2   20.08    2.39
  -3  -6  -2   22.62    2.54
   3   6   2   22.24    2.86
   3   6   2   19.89    2.71
  -3  -6  -2   20.92    2.54
   3   6   2   19.02    2.61
   3   6   2   20.17    2.79
   3   6   2   20.02    2.47
  -3  -6  -3  666.63   16.19
   3   6   3  721.23   17.82
   3   6   3  704.46   17.82
  -3  -6  -3  780.60   17.21
  -3  -6  -3  712.37   17.08
   3   6   3  655.42   16.35
   3   6   3  743.88   18.04
   3   6   3  705.66   17.16
  -3  -6  -4  333.97    9.52
   3   6   4  355.34   10.59
   3   6   4  335.83   11.05
  -3  -6  -4  363.60   10.26
  -3  -6  -4  360.28   10.26
   3   6   4  351.22   10.60
   3   6   4  341.66   10.42
  -3  -6  -5   17.92    1.90
   3   6   5   21.79    2.19
  -3  -6  -5   21.76    2.30
   3   6   5   21.13    2.16
   3   6   5   20.39    2.41
  -3  -6  -6   31.37    1.94
   3   6   6   34.52    2.80
   3   6   6   36.28    2.66
  -3  -7   8    0.11    0.72
   3   7  -8    0.56    0.84
  -3  -7   7   29.83    2.52
  -3  -7   7   31.84    2.60
  -3  -7   6   87.05    4.72
   3   7  -6   92.08    4.42
  -3  -7   6   84.78    4.60
   3   7  -6   91.34    4.44
  -3  -7   5   11.66    2.06
   3   7  -5   13.68    1.86
   3   7  -5   12.79    2.01
  -3  -7   5   11.85    1.88
   3   7  -5   12.64    2.23
   3   7  -5   15.58    2.20
  -3  -7   4  215.47    8.18
   3   7  -4  221.25    8.10
   3   7  -4  234.73    8.59
  -3  -7   4  221.96    7.93
   3   7  -4  220.30    8.58
  -3  -7   4  204.84    7.53
   3   7  -4  222.26    8.16
   3   7  -4  240.09    8.74
  -3  -7   3   35.37    3.24
   3   7  -3   37.93    3.23
   3   7  -3   43.96    3.87
   3   7  -3   36.62    3.44
  -3  -7   3   39.13    3.26
  -3  -7   3   39.06    3.31
   3   7  -3   41.68    3.60
   3   7  -3   40.29    3.75
  -3  -7   2  308.80    9.92
   3   7  -2  296.66    9.19
   3   7  -2  340.55   11.44
   3   7  -2  299.66   10.19
  -3  -7   2  316.77    9.96
  -3  -7   2  322.73    9.83
   3   7  -2  334.97   10.82
   3   7  -2  353.11   11.67
   3   7  -1  807.92   17.91
   3   7  -1 1025.15   22.55
   3   7  -1  820.61   19.65
  -3  -7   1  897.18   19.96
  -3  -7   1  915.43   19.80
   3   7  -1  940.31   21.35
   3   7  -1 1032.77   22.71
   3   7   0   28.70    2.40
   3   7   0   28.67    2.73
   3   7   0   32.70    3.59
  -3  -7   0   31.22    3.00
  -3  -7   0   29.36    2.83
   3   7   0   34.62    3.71
   3   7   1   90.62    4.49
  -3  -7  -1   92.62    4.73
   3   7   1   87.82    4.94
  -3  -7  -1  110.38    5.19
  -3  -7  -1   94.81    5.00
   3   7   1   97.07    5.43
   3   7   2  242.80    8.09
  -3  -7  -2  244.92    8.04
   3   7   2  263.63    9.45
   3   7   2  245.80    8.80
  -3  -7  -2  258.84    8.69
  -3  -7  -2  276.17    8.57
   3   7   2  250.46    8.68
   3   7   2  258.34    9.41
   3   7   3   47.31    3.33
  -3  -7  -3   43.40    2.95
   3   7   3   55.48    3.90
   3   7   3   49.30    3.73
  -3  -7  -3   53.35    3.58
   3   7   3   45.92    3.18
   3   7   3   50.73    3.75
   3   7   4   57.88    3.47
  -3  -7  -4   55.31    2.99
   3   7   4   61.87    3.65
   3   7   4   57.65    3.81
   3   7   4   65.94    3.77
   3   7   5   23.98    2.05
   3   7   5   24.88    2.31
  -3  -8   6    3.81    1.04
  -3  -8   6    3.79    1.08
   3   8  -6    5.34    1.22
  -3  -8   5   89.14    4.50
   3   8  -5  100.78    4.46
   3   8  -5   96.28    4.19
  -3  -8   5   93.73    4.31
   3   8  -5   92.96    4.14
  -3  -8   4    6.18    1.45
  -3  -8   4    7.16    1.58
   3   8  -4    6.55    1.52
  -3  -8   4    6.24    1.39
   3   8  -4    8.27    1.51
   3   8  -4    8.44    1.53
   3   8  -4    7.48    1.58
  -3  -8   3    1.70    1.14
  -3  -8   3    3.44    1.33
   3   8  -3    1.62    1.20
  -3  -8   3    2.06    1.17
   3   8  -3    2.98    1.12
   3   8  -3    2.19    1.25
   3   8  -3    2.49    1.30
   3   8  -2   15.02    2.21
  -3  -8   2   13.37    2.00
   3   8  -2   13.63    2.11
   3   8  -2   15.69    2.29
  -3  -8   1    1.66    1.28
   3   8  -1    1.62    1.34
   3   8  -1    1.11    1.34
   3   8  -1    1.86    1.38
  -3  -8   0   37.34    2.92
   3   8   0   45.24    3.67
  -3  -8   0   40.44    3.15
   3   8   0   43.90    3.65
  -3  -8  -1   24.92    2.31
  -3  -8  -1   27.61    2.54
   3   8   1   27.23    2.64
   3   8   1   24.41    2.16
  -3  -8  -2   46.70    2.84
   3   8   2   46.69    3.02
   3   8   2   54.73    3.60
  -3  -8  -2   50.00    3.20
   3   8   2   48.09    3.09
   3   8   2   54.72    3.64
   3   8   3   82.70    3.31
  -3  -8  -3   82.18    3.32
   3   8   3   81.91    3.37
   3   8   3   96.36    4.26
   3   8   3   89.09    3.99
  -3  -8  -3   93.18    4.03
   3   8   3  100.74    4.37
   3   9  -3   73.78    3.45
  -3  -9   3   69.02    3.20
   3   9  -3   74.17    3.38
   3   9  -3   74.41    3.48
  -3  -9   2    0.38    0.65
  -3  -9   2    0.51    0.82
   3   9  -2    0.09    0.83
  -3  -9   2   -0.13    0.81
   3   9  -2   -0.12    0.81
   3   9  -2    0.34    0.77
  -3  -9   1   64.46    3.29
   3   9  -1   72.96    3.66
  -3  -9   1   62.04    3.04
  -3  -9   1   69.72    3.44
   3   9  -1   74.21    3.63
   3   9  -1   71.40    3.66
  -3  -9   0   13.24    1.46
   3   9   0   15.06    1.75
  -3  -9   0   13.17    1.57
  -3  -9   0   12.41    1.39
   3   9   0   14.96    1.72
  -4   9   3  202.59    5.68
   4  -9  -3  190.48    5.74
  -4   9   2  129.99    4.31
   4  -9  -2  125.81    4.70
   4  -9  -1  205.25    6.45
  -4   9   0    3.80    1.10
   4  -9   0    4.03    1.17
   4  -9   0    4.27    1.11
  -4   9  -1   97.82    3.95
   4  -9   1   98.37    4.30
   4  -9   2   95.76    3.97
   4  -9   2   84.21    3.90
   4  -9   3    0.59    0.79
  -4   8   5  134.86    5.18
  -4   8   5  126.23    4.84
   4  -8  -5  118.76    4.64
  -4   8   5  132.05    4.92
  -4   8   5  134.60    5.22
  -4   8   4  215.98    7.17
  -4   8   4  212.14    6.98
  -4   8   4  198.64    7.02
   4  -8  -4  207.73    6.94
  -4   8   4  218.05    7.24
  -4   8   3   77.04    4.05
  -4   8   3   77.14    4.05
   4  -8  -3   67.09    3.37
   4  -8  -3   72.33    4.14
  -4   8   3   81.10    4.17
  -4   8   2  162.79    6.06
   4  -8  -2  166.32    5.94
   4  -8  -2  160.27    6.46
  -4   8   1  389.50   10.22
   4  -8  -1  413.18   10.73
   4  -8  -1  391.93   11.14
   4  -8   0  703.00   15.83
   4  -8   0  674.84   16.19
   4  -8   1  377.14   10.90
  -4   8  -1  376.60   10.44
   4  -8   1  398.12   10.69
   4  -8   2    4.79    1.29
   4  -8   2    7.58    1.73
   4  -8   2    8.22    1.67
   4  -8   3  267.89    8.07
   4  -8   3  287.38    8.53
   4  -8   4    6.88    1.38
   4  -8   4    7.89    1.48
   4  -8   4    7.78    1.51
   4  -8   5    6.83    1.33
  -4   8  -5    7.28    1.30
  -4   7   7   38.53    2.33
   4  -7  -7   37.47    2.40
  -4   7   7   38.75    2.24
   4  -7  -6   13.38    1.93
   4  -7  -6   13.58    1.81
  -4   7   6   11.96    1.58
  -4   7   6   12.11    1.51
   4  -7  -6   11.65    1.87
   4  -7  -5 2017.11   37.91
  -4   7   5 2152.77   37.48
   4  -7  -5 2041.51   37.33
   4  -7  -5 2043.48   37.60
  -4   7   5 1889.24   35.43
   4  -7  -5 2002.31   37.80
   4  -7  -4  805.30   18.72
  -4   7   4  820.08   18.48
   4  -7  -4  786.94   16.81
   4  -7  -4  827.94   18.63
   4  -7  -4  809.27   19.11
   4  -7  -4  808.66   18.68
   4  -7  -3  413.90   11.77
   4  -7  -3  386.77   11.71
   4  -7  -3  418.19   11.02
   4  -7  -3  424.11   12.13
  -4   7   3  385.74   14.15
   4  -7  -3  407.57   11.62
  -4   7   2  163.69    6.59
   4  -7  -2  146.37    6.69
   4  -7  -2  153.64    6.18
   4  -7  -2  160.32    6.88
  -4   7   1   32.12    2.86
   4  -7  -1   29.44    3.09
  -4   7   1   28.01    3.98
   4  -7  -1   31.08    2.84
   4  -7  -1   32.44    3.16
  -4   7   0   10.06    1.69
   4  -7   0   10.72    2.17
  -4   7   0   13.19    3.09
   4  -7   0   11.60    1.99
   4  -7   0   11.83    2.11
   4  -7   0   10.62    2.12
  -4   7  -1    1.11    1.89
   4  -7   1    0.08    1.06
   4  -7   1    1.98    1.43
   4  -7   1    1.53    1.44
   4  -7   1    2.47    1.36
   4  -7   1    1.00    1.25
   4  -7   2 1223.18   27.08
  -4   7  -2 1410.12   30.72
   4  -7   2 1177.87   25.49
   4  -7   2 1370.61   27.10
   4  -7   3  741.55   15.84
   4  -7   3  576.23   14.06
   4  -7   3  625.14   16.42
  -4   7  -3  692.87   18.27
   4  -7   3  653.45   15.91
   4  -7   4  117.19    5.61
   4  -7   4  120.59    5.14
   4  -7   5  129.50    5.37
   4  -7   5  136.88    5.98
   4  -7   5  139.29    5.08
   4  -7   5  138.93    5.72
   4  -7   6    5.35    1.17
   4  -7   6    2.38    1.16
   4  -7   6    1.67    0.99
   4  -6  -8  137.80    5.54
  -4   6   8  140.25    4.47
   4  -6  -8  145.97    5.14
   4  -6  -8  139.03    5.50
   4  -6  -7    0.56    1.11
  -4   6   7    0.52    0.89
   4  -6  -7    1.12    1.20
  -4   6   7    0.61    0.89
   4  -6  -7    1.19    1.12
  -4   6   6   13.28    1.97
   4  -6  -6   14.61    2.19
   4  -6  -6   11.76    1.96
  -4   6   6   13.59    1.92
   4  -6  -5    1.57    1.40
  -4   6   5    2.48    1.24
   4  -6  -5    1.51    1.40
   4  -6  -5    0.87    1.37
   4  -6  -5    0.60    1.24
   4  -6  -5    1.14    1.11
   4  -6  -5    1.68    1.02
   4  -6  -4   69.17    4.70
  -4   6   4   69.41    4.42
   4  -6  -4   58.26    3.96
   4  -6  -4   59.07    3.81
   4  -6  -4   65.67    4.42
   4  -6  -4   68.92    4.57
  -4   6   4   57.72    3.67
   4  -6  -4   66.32    3.91
   4  -6  -4   66.48    4.60
   4  -6  -3  116.25    5.87
   4  -6  -3  115.03    5.70
   4  -6  -3  126.28    5.60
   4  -6  -3  121.32    5.94
   4  -6  -3  113.41    5.52
   4  -6  -3  127.74    6.30
  -4   6   3  112.73    4.90
   4  -6  -3  115.08    5.79
   4  -6  -2   23.92    2.55
   4  -6  -2   23.50    2.72
   4  -6  -2   29.51    2.87
   4  -6  -2   22.53    2.68
   4  -6  -2   27.40    2.94
   4  -6  -2   31.48    3.22
   4  -6  -2   26.39    2.64
   4  -6  -1  459.02   11.89
   4  -6  -1  476.22   13.23
   4  -6  -1  500.54   12.82
   4  -6  -1  511.29   13.36
   4  -6  -1  504.91   13.57
   4  -6  -1  512.07   13.55
   4  -6  -1  460.34   11.89
   4  -6   0  930.15   19.99
   4  -6   0  930.04   20.49
   4  -6   0  949.67   20.40
  -4   6  -1 6284.72  110.67
   4  -6   1 6220.07  103.54
   4  -6   2  179.86    7.60
  -4   6  -2  192.58    9.79
   4  -6   2  188.97    6.92
   4  -6   2  183.50    7.17
   4  -6   3   29.27    2.75
   4  -6   3   27.88    3.10
   4  -6   3   33.86    2.84
   4  -6   3   29.14    3.04
   4  -6   3   29.76    3.06
  -4   6  -3   33.38    3.97
   4  -6   4  614.55   15.26
   4  -6   4  586.58   15.80
   4  -6   4  586.92   15.62
   4  -6   4  646.73   14.54
   4  -6   4  604.30   15.27
  -4   6  -4  608.72   16.80
   4  -6   5   29.80    2.96
   4  -6   5   33.70    3.29
   4  -6   5   27.42    2.41
   4  -6   5   29.83    2.87
   4  -6   6  226.55    8.01
   4  -6   6  231.48    8.27
   4  -6   6  212.65    7.35
   4  -6   7   32.00    2.64
   4  -6   7   34.16    2.81
   4  -6   7   32.84    2.40
   4  -5  -9   -0.25    0.74
  -4   5   9   -0.17    0.73
   4  -5  -9   -0.32    0.83
   4  -5  -9   -0.14    0.79
  -4   5   8  236.60    6.93
   4  -5  -8  257.24    8.83
   4  -5  -8  253.68    8.14
  -4   5   8  257.77    7.94
   4  -5  -8  256.83    8.85
   4  -5  -7   20.84    2.85
  -4   5   7   20.59    2.22
   4  -5  -7   23.04    2.65
  -4   5   7   25.25    2.60
   4  -5  -7   22.06    2.91
  -4   5   6  211.76    7.66
   4  -5  -6  190.55    7.02
   4  -5  -6  204.92    6.71
   4  -5  -6  216.26    8.04
   4  -5  -6  190.48    7.49
  -4   5   6  217.26    7.89
   4  -5  -5  125.76    5.55
   4  -5  -5  142.26    7.08
   4  -5  -5  135.26    5.83
   4  -5  -5  134.76    5.76
   4  -5  -5  145.26    6.55
   4  -5  -5  135.40    6.38
  -4   5   5  138.71    6.12
   4  -5  -5  144.03    7.14
   4  -5  -4  317.63   10.73
   4  -5  -4  301.07    9.51
   4  -5  -4  325.97    9.85
   4  -5  -4  311.23    9.75
   4  -5  -4  326.50   10.23
   4  -5  -4  338.99   10.52
  -4   5   4  316.39    9.70
   4  -5  -4  324.35   10.81
   4  -5  -3  664.00   16.48
   4  -5  -3  653.30   15.65
   4  -5  -3  707.46   16.65
   4  -5  -3  690.22   16.46
   4  -5  -3  674.76   16.48
  -4   5   3  639.53   15.14
   4  -5  -3  666.86   16.55
   4  -5  -3  700.93   16.11
   4  -5  -2    3.34    1.25
  -4   5   2    3.50    1.05
   4  -5  -2    3.20    1.29
   4  -5  -2    4.97    1.53
   4  -5  -2    3.15    1.32
   4  -5  -2    5.33    1.54
   4  -5  -2    3.90    1.45
   4  -5  -1   23.09    2.20
   4  -5  -1   27.84    2.68
   4  -5  -1   26.45    2.65
   4  -5  -1   24.19    2.55
   4  -5  -1   25.36    2.58
   4  -5  -1   21.64    2.13
   4  -5   0  221.37    7.92
   4  -5   0  245.32    7.92
   4  -5   0  245.73    8.37
   4  -5   0  228.63    7.72
   4  -5   1  119.32    5.68
   4  -5   1  107.50    4.95
   4  -5   1  122.79    5.44
   4  -5   1  118.73    5.60
   4  -5   2    5.34    1.28
   4  -5   2    5.10    1.60
   4  -5   2    4.46    1.21
   4  -5   2    8.05    1.75
   4  -5   2    4.56    1.54
   4  -5   2    3.45    1.18
   4  -5   2    5.17    1.42
   4  -5   3    1.16    1.17
   4  -5   3    4.06    1.53
  -4   5  -3    0.79    1.71
   4  -5   3    1.83    1.40
   4  -5   3    1.82    1.32
   4  -5   3    1.72    1.09
   4  -5   4    5.45    1.65
  -4   5  -4    5.64    1.87
   4  -5   4    5.71    1.86
   4  -5   4    6.27    1.74
   4  -5   4    6.02    1.61
   4  -5   4    8.01    1.49
   4  -5   5  161.29    7.01
   4  -5   5  164.34    7.19
   4  -5   5  136.57    5.35
   4  -5   5  135.52    6.07
   4  -5   6  622.73   15.45
  -4   5  -6  538.86   17.20
   4  -5   6  609.69   15.42
   4  -5   6  522.35   13.62
   4  -5   7  232.30    8.04
   4  -5   7  247.35    8.29
  -4   5  -8   38.54    2.50
   4  -4  -9   32.71    2.87
   4  -4  -9   32.02    2.61
   4  -4  -9   32.87    2.86
   4  -4  -8  248.10    9.11
   4  -4  -8  241.56    8.32
  -4   4   8  237.59    8.16
   4  -4  -8  248.61    9.17
   4  -4  -7  407.28   11.03
   4  -4  -7  467.86   13.90
  -4   4   7  430.37   12.07
  -4   4   7  441.69   11.58
   4  -4  -7  490.28   12.96
   4  -4  -7  414.20   11.06
  -4   4   7  485.04   12.83
   4  -4  -7  461.95   13.89
   4  -4  -6  135.93    7.05
  -4   4   6  139.20    6.03
  -4   4   6  140.82    6.05
   4  -4  -6  134.95    5.58
   4  -4  -6  133.49    5.84
   4  -4  -6  128.63    5.83
  -4   4   6  142.04    6.35
   4  -4  -6  147.88    6.51
   4  -4  -6  143.20    7.20
  -4   4   5   13.96    1.87
   4  -4  -5   13.31    2.06
   4  -4  -5   15.53    1.98
   4  -4  -5   13.34    1.91
   4  -4  -5   16.63    2.32
   4  -4  -5   13.44    2.13
  -4   4   5   15.20    2.17
   4  -4  -4   62.34    4.34
   4  -4  -4   69.14    4.16
   4  -4  -4   61.11    3.60
   4  -4  -4   62.19    3.85
   4  -4  -4   66.90    4.15
  -4   4   4   58.71    3.78
   4  -4  -4   61.63    4.32
  -4   4   3  271.31    7.61
   4  -4  -3  255.71    8.69
   4  -4  -3  283.73    8.75
   4  -4  -3  280.82    8.19
   4  -4  -3  283.22    8.75
   4  -4  -3  275.11    8.76
   4  -4  -3  259.43    8.75
  -4   4   2  216.20    6.25
   4  -4  -2  201.44    7.14
   4  -4  -2  235.30    7.67
   4  -4  -2  217.19    7.00
   4  -4  -2  239.22    7.71
   4  -4  -2  254.51    7.90
   4  -4  -2  238.28    7.85
   4  -4  -2  205.26    7.21
   4  -4  -1  472.51   11.60
   4  -4  -1  525.28   11.78
  -4   4   1  384.10    9.25
   4  -4  -1  391.77   10.25
   4  -4  -1  421.68   10.66
   4  -4  -1  461.60   11.45
   4  -4  -1  427.40   11.13
   4  -4  -1  396.80   10.30
   4  -4   0 1455.68   27.74
   4  -4   0 1484.88   28.23
   4  -4   0 1495.97   27.93
   4  -4   1 1341.05   24.93
   4  -4   1 1484.95   26.81
   4  -4   1 1387.16   26.39
   4  -4   1 1394.17   26.09
   4  -4   1 1274.53   25.40
   4  -4   1 1374.12   26.60
   4  -4   1 1367.92   25.93
   4  -4   2   32.66    2.53
   4  -4   2   32.44    2.51
   4  -4   2   31.57    1.93
   4  -4   2   31.87    2.76
   4  -4   2   30.97    2.63
   4  -4   2   31.20    2.60
   4  -4   2   28.39    2.54
   4  -4   2   26.09    2.19
   4  -4   3  523.56   12.88
   4  -4   3  448.98   10.89
   4  -4   3  523.58   10.98
  -4   4  -3  457.42   14.60
   4  -4   3  481.24   11.60
   4  -4   3  517.61   12.92
   4  -4   3  462.50   12.18
   4  -4   3  497.55   12.91
   4  -4   4   26.96    2.77
   4  -4   4   24.30    2.07
   4  -4   4   21.41    1.98
   4  -4   4   25.84    2.83
   4  -4   4   21.88    2.35
  -4   4  -4   22.69    2.84
   4  -4   4   23.28    2.58
   4  -4   5  493.76   13.34
  -4   4  -5  442.22   14.93
   4  -4   5  472.41   11.28
   4  -4   5  476.88   13.13
   4  -4   5  406.26   10.04
   4  -4   5  394.30   11.34
   4  -4   6   55.47    4.23
   4  -4   6   59.58    3.50
  -4   4  -6   55.36    4.89
   4  -4   6   54.68    4.20
   4  -4   6   46.04    3.31
   4  -4   7    0.78    0.91
   4  -4   8   83.86    3.68
   4  -4   9   14.72    1.55
   4  -4   9   17.40    1.70
   4  -3 -10   73.81    3.60
   4  -3 -10   63.77    3.35
  -4   3  10   66.73    3.21
   4  -3 -10   70.36    3.52
   4  -3  -9  247.43    8.79
   4  -3  -9  263.24    8.41
  -4   3   9  242.94    7.97
   4  -3  -9  256.95    8.95
   4  -3  -8    2.49    1.58
  -4   3   8    3.71    1.35
   4  -3  -8    2.54    1.62
  -4   3   8    1.38    0.86
   4  -3  -8    3.60    1.60
   4  -3  -7  796.69   19.82
  -4   3   7  793.76   18.31
  -4   3   7  740.89   16.53
   4  -3  -7  720.30   16.85
   4  -3  -7  703.27   15.93
  -4   3   7  819.54   18.54
   4  -3  -7  770.87   19.59
  -4   3   6 3405.39   57.24
   4  -3  -6 3433.46   57.05
   4  -3  -6 3273.14   56.29
  -4   3   6 3472.32   57.81
  -4   3   5  233.48    7.71
   4  -3  -5  225.79    7.69
   4  -3  -5  230.12    7.93
   4  -3  -5  231.20    7.05
   4  -3  -5  226.04    7.84
   4  -3  -4    8.32    1.80
   4  -3  -4    8.51    1.58
  -4   3   4   12.21    1.64
   4  -3  -4   10.51    1.83
   4  -3  -4    8.24    1.81
   4  -3  -4   10.57    1.47
   4  -3  -4    6.99    1.58
   4  -3  -4   12.47    1.88
   4  -3  -4    9.37    1.68
   4  -3  -3  896.29   19.46
   4  -3  -3  953.71   19.51
   4  -3  -3  883.84   17.81
   4  -3  -3  911.78   19.11
   4  -3  -3  968.34   19.41
   4  -3  -3  917.49   18.99
   4  -3  -3  857.13   18.86
   4  -3  -3  905.76   18.32
   4  -3  -3  923.58   19.54
  -4   3   2  106.07    4.25
   4  -3  -2   97.54    4.45
   4  -3  -2  110.62    4.81
   4  -3  -2  105.57    4.04
   4  -3  -2  106.66    4.66
   4  -3  -2  115.51    4.86
   4  -3  -2  107.21    4.56
   4  -3  -2  114.27    3.92
   4  -3  -2  108.91    4.69
   4  -3  -2   98.77    4.48
   4  -3  -1  519.41   12.61
  -4   3   1  534.23   11.91
   4  -3  -1  497.71   11.52
   4  -3  -1  502.13   10.70
   4  -3  -1  542.05   11.51
   4  -3  -1  604.85   13.04
   4  -3  -1  579.99   12.47
   4  -3  -1  479.12   11.44
  -4   3   0  317.71    8.54
   4  -3   0  312.76    8.39
   4  -3   0  322.00    7.51
   4  -3   0  347.43    9.00
   4  -3   0  336.01    8.35
   4  -3   0  342.19    8.81
   4  -3   0  331.82    8.82
   4  -3   1   31.64    2.13
   4  -3   1   30.21    1.95
   4  -3   1   36.83    2.47
   4  -3   1   34.17    2.46
   4  -3   1   33.91    2.37
   4  -3   1   30.50    2.16
   4  -3   1   30.34    2.32
   4  -3   1   33.13    2.31
   4  -3   1   33.54    2.50
  -4   3  -1   33.27    2.41
   4  -3   2  137.12    4.94
   4  -3   2  137.21    4.21
   4  -3   2  138.25    5.13
   4  -3   2  143.31    4.69
   4  -3   2  140.21    5.26
   4  -3   2  131.65    4.86
   4  -3   2  137.85    5.18
   4  -3   2  131.40    5.01
   4  -3   2  122.28    4.49
   4  -3   2  156.34    5.47
   4  -3   3   13.62    1.32
   4  -3   3   14.18    1.87
   4  -3   3   13.57    1.57
   4  -3   3   14.19    1.85
   4  -3   3   11.21    1.40
   4  -3   3   12.26    1.52
   4  -3   3   11.51    1.44
   4  -3   3   15.05    1.96
   4  -3   3   12.76    1.63
   4  -3   4   69.11    4.19
   4  -3   4   67.15    3.62
   4  -3   4   57.34    2.84
   4  -3   4   67.71    4.17
   4  -3   4   54.04    3.29
   4  -3   4   55.53    2.80
   4  -3   5   19.07    2.51
   4  -3   5   17.59    2.10
  -4   3  -5   16.23    2.92
   4  -3   5   16.30    2.39
   4  -3   5   15.78    1.93
   4  -3   6   56.40    3.71
  -4   3  -6   51.17    4.44
   4  -3   6   45.24    3.82
   4  -3   6   38.92    2.88
   4  -3   7   59.21    3.84
  -4   3  -7   51.18    4.31
   4  -3   8   88.36    4.56
   4  -3   8   89.43    4.29
   4  -3   9   30.67    2.24
   4  -3   9   29.21    2.07
   4  -3   9   27.58    2.24
   4  -2 -10  486.94   11.66
   4  -2 -10  439.86   11.16
  -4   2  10  423.76   10.47
   4  -2 -10  481.70   11.61
  -4   2   9   49.45    3.12
   4  -2  -9   49.76    3.93
  -4   2   9   50.75    3.47
   4  -2  -9   51.76    3.97
  -4   2   8  131.29    5.73
   4  -2  -8  156.48    7.35
   4  -2  -8  131.35    5.47
  -4   2   8  142.23    6.59
  -4   2   8  143.47    6.31
   4  -2  -8  160.20    7.42
  -4   2   7   32.25    2.86
   4  -2  -7   32.01    3.56
  -4   2   7   34.39    3.18
   4  -2  -7   33.34    2.99
  -4   2   7   31.47    2.47
   4  -2  -7   33.24    3.61
  -4   2   6 3223.40   57.74
  -4   2   6 3508.63   59.28
   4  -2  -6 3540.34   60.95
   4  -2  -6 3585.42   59.04
   4  -2  -6 3264.39   56.21
   4  -2  -6 3061.44   58.06
   4  -2  -6 3588.75   59.58
   4  -2  -6 3354.81   57.73
   4  -2  -6 3549.72   61.04
  -4   2   5  286.95    8.40
  -4   2   5  317.84    9.36
   4  -2  -5  322.60    9.47
   4  -2  -5  317.13    7.92
   4  -2  -5  340.42    9.65
   4  -2  -5  300.44    9.23
   4  -2  -5  283.20    8.93
  -4   2   4  626.36   13.97
  -4   2   4  712.92   15.29
   4  -2  -4  693.61   16.17
   4  -2  -4  668.55   15.14
   4  -2  -4  654.75   13.28
   4  -2  -4  673.01   15.27
   4  -2  -4  698.09   15.25
   4  -2  -4  632.55   15.16
   4  -2  -4  637.99   15.30
   4  -2  -4  695.05   16.20
  -4   2   3  675.39   14.34
  -4   2   3  769.28   15.50
   4  -2  -3  668.59   15.57
   4  -2  -3  713.70   15.47
   4  -2  -3  732.53   15.26
   4  -2  -3  675.55   13.50
   4  -2  -3  754.13   15.81
   4  -2  -3  765.21   15.29
   4  -2  -3  690.57   15.03
   4  -2  -3  709.95   15.54
   4  -2  -3  650.39   15.47
   4  -2  -2  847.81   17.34
   4  -2  -2  912.90   18.48
  -4   2   2  919.95   18.02
   4  -2  -2  825.75   17.65
   4  -2  -2  908.03   18.05
   4  -2  -2  811.94   16.00
   4  -2  -2  977.47   18.61
   4  -2  -2  920.79   16.94
   4  -2  -2  926.28   18.27
   4  -2  -2  921.94   17.79
   4  -2  -2  839.62   17.73
  -4   2   1   42.61    2.84
   4  -2  -1   44.39    2.65
   4  -2  -1   40.61    2.66
   4  -2  -1   33.72    2.23
   4  -2  -1   51.89    2.96
   4  -2  -1   39.82    2.25
   4  -2  -1   38.53    1.99
   4  -2  -1   49.63    2.70
   4  -2  -1   34.00    2.26
   4  -2   0 1085.81   21.28
   4  -2   0 1186.30   21.66
   4  -2   0 1133.27   20.61
   4  -2   0 1081.07   20.16
   4  -2   0 1236.27   21.95
   4  -2   0 1111.49   20.90
   4  -2   0 1138.95   21.53
   4  -2   1 4016.20   68.81
   4  -2   1 4332.52   68.85
   4  -2   1 4274.37   69.09
   4  -2   1 4197.25   68.96
   4  -2   1 4307.45   69.70
   4  -2   1 4253.46   68.90
   4  -2   1 4579.36   69.86
   4  -2   1 4249.81   70.07
   4  -2   1 4127.11   68.90
   4  -2   1 4042.53   68.79
   4  -2   1 4301.50   69.29
   4  -2   2   47.00    2.44
   4  -2   2   42.18    2.27
   4  -2   2   44.83    2.77
   4  -2   2   43.32    2.53
   4  -2   2   44.29    2.45
   4  -2   2   44.72    2.60
   4  -2   2   41.66    2.41
   4  -2   2   49.43    2.79
   4  -2   2   45.64    2.62
   4  -2   2   42.64    2.67
   4  -2   2   39.10    2.27
   4  -2   3  260.34    6.84
   4  -2   3  245.04    7.66
   4  -2   3  258.32    7.37
   4  -2   3  250.32    7.00
   4  -2   3  220.80    6.13
   4  -2   3  249.83    6.64
   4  -2   3  239.65    7.58
   4  -2   3  223.10    6.48
   4  -2   4  106.52    5.20
   4  -2   4  109.24    4.96
  -4   2  -4  109.09    5.89
   4  -2   4   98.27    4.92
   4  -2   4   91.20    3.97
   4  -2   4  108.50    4.30
   4  -2   5  211.60    7.36
  -4   2  -5  200.88    8.30
   4  -2   5  195.90    7.49
   4  -2   5  160.54    5.70
   4  -2   5  174.02    5.89
   4  -2   5  194.89    6.25
   4  -2   6 1469.02   30.09
   4  -2   6 1669.49   30.08
  -4   2  -6 1551.25   31.40
   4  -2   6 1331.93   27.24
   4  -2   6 1463.13   27.47
   4  -2   7    7.00    1.34
   4  -2   7    9.16    1.95
  -4   2  -7    7.33    2.01
   4  -2   7    8.39    1.82
   4  -2   8  176.78    6.65
   4  -2   8  202.16    6.97
   4  -2   8  193.94    7.18
   4  -2   9  503.21   11.48
   4  -2   9  512.32   11.51
   4  -2   9  477.59   11.55
  -4   1  10   43.58    2.83
   4  -1 -10   44.32    3.13
  -4   1  10   40.01    2.52
   4  -1 -10   44.85    3.15
  -4   1   9  278.99    9.00
   4  -1  -9  278.95    9.91
   4  -1  -9  269.11    9.01
  -4   1   9  263.38    8.50
   4  -1  -9  282.59   10.04
  -4   1   8  791.55   18.73
   4  -1  -8  871.66   20.45
   4  -1  -8  726.66   17.49
  -4   1   8  850.44   19.43
   4  -1  -8  761.85   18.64
  -4   1   8  808.32   18.39
   4  -1  -8  874.01   20.47
  -4   1   7  130.92    6.03
   4  -1  -7  136.70    6.87
  -4   1   7  150.77    6.57
   4  -1  -7  128.98    5.86
   4  -1  -7  122.74    5.45
   4  -1  -7  136.68    6.23
  -4   1   7  132.30    5.99
   4  -1  -7  136.63    6.87
  -4   1   6  305.43    9.43
  -4   1   6  359.75   10.30
   4  -1  -6  356.75   11.20
   4  -1  -6  302.22    9.62
   4  -1  -6  310.47    9.52
   4  -1  -6  325.36    9.87
   4  -1  -6  298.23    8.82
   4  -1  -6  344.99   11.05
   4  -1  -5    7.49    1.74
   4  -1  -5    5.87    1.97
  -4   1   5    9.21    1.53
   4  -1  -5    7.17    1.74
   4  -1  -5    8.40    0.99
   4  -1  -5    6.34    1.37
   4  -1  -5    6.96    1.49
   4  -1  -5    6.94    1.52
   4  -1  -5    6.18    1.41
   4  -1  -5    5.57    1.49
  -4   1   4 3415.11   56.73
  -4   1   4 3728.61   58.08
   4  -1  -4 3542.41   57.82
   4  -1  -4 3073.28   53.99
   4  -1  -4 3680.14   58.07
   4  -1  -4 3584.32   57.20
   4  -1  -4 3172.77   57.61
   4  -1  -4 3281.07   57.37
   4  -1  -4 3441.86   56.70
   4  -1  -3   22.35    2.28
  -4   1   3   22.03    2.15
   4  -1  -3   18.96    2.04
   4  -1  -3   21.08    2.08
   4  -1  -3   22.56    1.17
   4  -1  -3   21.31    1.97
   4  -1  -3   23.41    2.25
  -4   1   3   19.50    1.81
   4  -1  -3   23.44    2.00
   4  -1  -3   22.04    1.99
   4  -1  -3   23.31    2.18
   4  -1  -3   18.78    2.03
  -4   1   2   51.81    3.30
   4  -1  -2   45.50    2.77
   4  -1  -2   49.14    2.72
   4  -1  -2   43.48    1.55
   4  -1  -2   50.74    2.77
   4  -1  -2   52.71    3.10
  -4   1   2   48.75    2.42
   4  -1  -2   49.88    2.64
   4  -1  -2   47.36    2.57
   4  -1  -2   51.35    2.99
   4  -1  -2   46.17    2.80
   4  -1  -1 1139.70   18.83
   4  -1  -1  894.29   17.62
   4  -1  -1 1060.71   18.46
   4  -1  -1  977.25   17.66
   4  -1  -1  835.94   15.46
   4  -1  -1  981.77   18.14
  -4   1   1  870.68   16.13
   4  -1  -1  895.60   17.68
  -4   1   1  967.60   19.41
   4  -1   0  216.29    6.18
   4  -1   0  215.03    5.94
   4  -1   0  213.33    6.13
   4  -1   0  216.23    5.92
   4  -1   0  234.85    6.52
   4  -1   0  228.87    6.41
   4  -1   1  347.51    8.32
   4  -1   1  359.41    8.36
   4  -1   1  326.06    8.13
   4  -1   1  319.27    7.84
   4  -1   1  356.30    8.37
   4  -1   1  327.16    8.01
   4  -1   1  355.57    8.84
   4  -1   1  371.45    8.57
   4  -1   1  339.27    8.28
   4  -1   1  301.55    7.26
   4  -1   2 2511.17   40.72
   4  -1   2 2344.85   40.20
   4  -1   2 2221.65   39.61
   4  -1   2 2503.41   41.24
   4  -1   2 2533.22   40.26
   4  -1   2 2412.68   40.93
   4  -1   2 2367.53   41.11
   4  -1   2 2352.19   40.70
   4  -1   2 2264.47   39.87
  -4   1  -2 2278.98   41.57
   4  -1   3 1082.60   20.45
   4  -1   3 1120.56   22.09
  -4   1  -3 1151.81   22.56
   4  -1   3 1087.84   21.46
   4  -1   3 1122.32   21.38
   4  -1   3 1066.84   19.65
   4  -1   3 1108.41   21.87
   4  -1   3 1025.89   19.91
   4  -1   3 1180.32   21.25
   4  -1   4  518.23   11.32
  -4   1  -4  530.72   13.47
   4  -1   4  516.63   12.02
   4  -1   4  536.50   13.14
   4  -1   4  550.20   12.38
   4  -1   5   53.44    3.06
   4  -1   5   62.32    4.12
  -4   1  -5   64.20    4.36
   4  -1   5   54.37    3.20
   4  -1   5   57.66    3.53
   4  -1   6 1677.63   32.21
  -4   1  -6 1675.79   32.73
   4  -1   7   27.68    2.84
   4  -1   7   29.00    2.91
  -4   1  -7   23.40    2.86
   4  -1   7   24.03    2.38
   4  -1   8    1.12    0.93
   4  -1   8    1.88    1.15
   4  -1   8    2.08    1.21
   4  -1   8    1.83    1.40
   4  -1   9  320.21    8.10
   4  -1   9  324.85    8.27
   4   0 -11    0.79    0.72
  -4   0  10  304.47    8.97
   4   0 -10  313.51    8.85
   4   0 -10  303.31    8.80
   4   0  -9    4.04    1.59
  -4   0   9    3.23    1.16
   4   0  -9    3.91    1.60
  -4   0   9    4.75    1.56
   4   0  -9    3.29    1.42
   4   0  -9    4.75    1.33
  -4   0   8  300.15   10.10
   4   0  -8  331.80   10.89
   4   0  -8  279.20    9.23
  -4   0   8  297.42    9.92
   4   0  -8  277.94    9.25
  -4   0   8  278.18    9.09
   4   0  -8  337.61   10.98
  -4   0   7  114.61    5.77
   4   0  -7  105.76    5.39
   4   0  -7  115.94    6.25
   4   0  -7   99.68    5.07
   4   0  -7  106.17    5.37
   4   0  -7  107.13    6.06
   4   0  -6    0.95    1.29
   4   0  -6    0.06    1.31
   4   0  -6    1.72    1.41
  -4   0   6    0.41    1.13
   4   0  -6    0.63    1.00
   4   0  -6    0.33    1.10
   4   0  -6   -0.15    0.88
   4   0  -6    1.10    1.27
   4   0  -5  102.02    5.61
  -4   0   5  105.77    4.93
  -4   0   5  103.80    5.16
   4   0  -5  112.06    5.14
   4   0  -5   98.93    5.26
   4   0  -5  106.45    4.97
   4   0  -5  111.29    4.79
   4   0  -5  100.86    4.72
   4   0  -5  105.42    5.42
  -4   0   4  276.07    8.38
  -4   0   4  265.63    7.90
   4   0  -4  289.72    8.36
   4   0  -4  280.97    8.30
   4   0  -4  271.42    7.47
   4   0  -4  271.08    8.20
   4   0  -3 4654.49   79.12
  -4   0   3 5279.74   80.03
   4   0  -3 4899.40   79.31
   4   0  -3 4949.35   79.53
   4   0  -3 4803.69   77.96
   4   0  -3 4249.54   78.97
   4   0  -3 4755.84   77.56
   4   0  -3 4840.33   79.13
   4   0  -3 4901.73   79.51
  -4   0   2 2104.65   36.61
   4   0  -2 1984.57   34.87
  -4   0   2 1961.90   34.20
   4   0  -2 1985.73   34.72
   4   0  -2 1900.26   34.56
   4   0  -2 2046.11   35.03
   4   0  -2 1869.35   34.25
   4   0  -2 2000.59   35.26
   4   0  -2 1912.79   34.68
   4   0  -1  157.48    5.04
  -4   0   1  151.85    4.49
   4   0  -1  144.69    4.95
   4   0  -1  161.99    5.25
   4   0  -1  175.87    5.35
   4   0  -1  161.55    5.27
   4   0  -1  177.20    5.70
   4   0  -1  144.52    4.97
   4   0   0  629.73   12.23
  -4   0   0  508.55   10.31
   4   0   0  549.99   11.20
   4   0   0  552.23   11.53
  -4   0   0  467.42   10.22
   4   0   0  594.63   12.20
   4   0   0  561.69   12.16
   4   0   0  595.77   12.25
   4   0   1 2232.99   35.96
   4   0   1 1953.47   35.21
   4   0   1 2041.86   34.72
   4   0   1 2113.97   35.36
   4   0   1 1926.33   34.87
   4   0   1 2075.57   35.56
   4   0   2  671.04   13.97
   4   0   2  662.58   14.27
   4   0   2  621.94   13.84
  -4   0  -2  656.05   13.32
   4   0   2  725.70   14.79
   4   0   2  640.99   12.81
   4   0   2  696.28   14.14
   4   0   2  648.51   13.38
   4   0   2  603.44   12.77
   4   0   3  887.26   17.83
   4   0   3  866.25   18.56
   4   0   3  896.35   18.60
  -4   0  -3  960.45   18.34
   4   0   3  911.00   18.63
   4   0   3  817.31   18.57
   4   0   3  945.82   18.29
   4   0   3  817.86   17.00
   4   0   4 4367.60   73.04
   4   0   4 4469.26   74.30
  -4   0  -4 4632.00   74.41
   4   0   4 4548.09   74.03
   4   0   4 4614.51   75.07
   4   0   5 2850.87   49.64
   4   0   5 3080.61   51.82
   4   0   5 3139.28   51.82
  -4   0  -5 2958.88   51.36
   4   0   5 2823.66   50.11
   4   0   5 2744.81   51.90
   4   0   5 2987.30   51.20
   4   0   5 2669.80   50.16
   4   0   6 1985.52   36.07
   4   0   6 2110.31   38.85
   4   0   6 2225.77   39.06
  -4   0  -6 2190.18   38.93
   4   0   6 1959.60   36.26
   4   0   6 2061.61   38.24
   4   0   6 1923.06   37.41
   4   0   7   90.05    4.91
   4   0   7   90.79    4.89
   4   0   7   81.77    4.90
   4   0   7   81.94    4.54
   4   0   7   81.03    4.46
   4   0   8    5.11    1.22
   4   0   8    4.23    1.39
   4   0   8    6.12    1.47
   4   0   8    3.88    1.51
   4   0   9  237.50    6.69
   4   0   9  246.62    6.87
  -4  -1  11  115.80    4.40
   4   1 -11  110.89    3.97
  -4  -1  10  169.28    6.64
   4   1 -10  176.43    6.14
   4   1 -10  159.15    5.80
   4   1 -10  171.23    6.08
  -4  -1   9  692.68   16.39
   4   1  -9  589.81   14.34
   4   1  -9  685.61   16.03
   4   1  -9  589.37   14.47
  -4  -1   9  529.14   12.87
   4   1  -9  685.36   16.06
  -4  -1   8  428.95   12.81
   4   1  -8  419.72   11.84
   4   1  -8  431.36   12.85
  -4  -1   8  384.58   11.74
   4   1  -8  415.43   11.66
  -4  -1   8  400.04   10.63
  -4  -1   8  376.04   10.47
   4   1  -8  429.61   12.86
  -4  -1   7   18.22    2.69
   4   1  -7   18.22    2.50
   4   1  -7   18.84    2.65
  -4  -1   7   16.94    2.23
   4   1  -7   19.37    2.36
   4   1  -7   17.47    2.28
  -4  -1   7   15.44    1.91
   4   1  -7   18.66    2.69
  -4  -1   6   32.09    3.07
  -4  -1   6   33.38    2.91
   4   1  -6   30.14    2.94
   4   1  -6   32.53    3.23
   4   1  -6   28.90    2.79
   4   1  -6   32.28    2.81
   4   1  -6   28.24    2.49
   4   1  -6   31.66    3.19
  -4  -1   6   26.78    2.31
   4   1  -5  216.76    8.12
  -4  -1   5  247.68    8.03
  -4  -1   5  247.47    7.97
   4   1  -5  228.90    7.87
   4   1  -5  226.98    8.24
   4   1  -5  244.75    7.39
  -4  -1   5  204.07    6.48
   4   1  -5  213.72    7.24
   4   1  -5  232.07    8.35
   4   1  -4 1573.08   29.54
  -4  -1   4 1493.07   29.10
  -4  -1   4 1643.25   29.69
   4   1  -4 1670.19   29.83
   4   1  -4 1570.82   30.10
   4   1  -4 1513.29   27.75
   4   1  -4 1464.30   28.94
   4   1  -4 1585.00   30.20
   4   1  -3 1053.44   20.64
   4   1  -3  981.85   21.36
   4   1  -3  976.51   19.20
   4   1  -3 1087.01   20.81
   4   1  -3  996.12   20.31
  -4  -1   2  267.85    6.62
   4   1  -2  285.64    7.86
   4   1  -2  258.47    7.63
   4   1  -2  256.82    8.07
   4   1  -2  271.63    7.61
   4   1  -2  257.27    7.19
   4   1  -2  263.90    7.71
   4   1  -2  252.31    7.60
  -4  -1   1    8.07    1.30
   4   1  -1    8.91    1.39
   4   1  -1    8.93    1.32
   4   1  -1   11.05    1.49
   4   1  -1    9.07    1.33
   4   1  -1   10.25    1.40
   4   1  -1   10.64    1.54
  -4  -1   1    8.78    1.20
   4   1  -1    9.33    1.33
  -4  -1   1    9.42    1.27
   4   1   0 3420.77   55.51
   4   1   0 3385.58   55.61
  -4  -1   0 3054.09   54.81
   4   1   0 3145.23   54.93
   4   1   0 3560.35   55.91
   4   1   0 3407.79   56.68
   4   1   0 3522.48   56.03
   4   1   0 3591.89   56.50
  -4  -1   0 3213.61   55.19
   4   1   0 3362.06   55.67
   4   1   1 3180.06   51.21
   4   1   1 3158.12   50.66
   4   1   1 3010.91   50.59
   4   1   1 2899.92   49.68
  -4  -1  -1 2672.59   49.23
   4   1   1 3052.83   50.46
   4   1   1 3102.56   51.46
  -4  -1  -1 2901.05   49.57
   4   1   1 3089.41   50.05
   4   1   1 3047.39   50.32
   4   1   1 3199.41   50.83
   4   1   1 2887.20   49.76
   4   1   2    0.69    0.85
   4   1   2    0.75    0.94
   4   1   2    2.60    1.06
   4   1   2    0.66    0.84
   4   1   2    0.26    0.50
   4   1   2    1.86    1.01
   4   1   2    0.67    0.76
   4   1   3   40.03    2.86
   4   1   3   45.01    3.27
   4   1   3   41.14    3.08
   4   1   3   38.37    2.82
   4   1   3   40.34    2.68
   4   1   3   36.95    2.85
   4   1   4   91.78    4.75
   4   1   4   85.99    4.49
  -4  -1  -4   87.07    4.10
   4   1   4  100.28    5.06
   4   1   4   92.86    4.83
   4   1   4   92.81    4.40
   4   1   4   90.82    4.61
   4   1   5  467.78   12.57
   4   1   5  475.40   12.50
  -4  -1  -5  435.02   11.42
   4   1   5  484.51   12.66
   4   1   5  440.86   12.13
   4   1   5  466.14   12.09
   4   1   6  459.57   11.81
   4   1   6  468.09   12.75
   4   1   6  440.39   12.25
   4   1   6  440.19   11.77
   4   1   6  447.58   12.13
   4   1   7   19.49    2.01
   4   1   7   22.93    2.55
   4   1   7   20.96    2.40
   4   1   7   22.11    2.74
   4   1   7   18.18    2.36
   4   1   7   20.69    2.32
   4   1   8   61.28    3.55
   4   1   8   59.57    3.42
  -4  -1  -8   61.17    3.87
   4   1   9   86.38    3.35
  -4  -1  -9   80.97    3.39
  -4  -2  10  187.91    6.77
   4   2 -10  171.69    5.72
  -4  -2   9   81.44    4.96
   4   2  -9   80.79    4.43
   4   2  -9   86.64    4.73
   4   2  -9   82.26    4.29
  -4  -2   9   73.77    3.89
   4   2  -9   83.56    4.67
   4   2  -8    0.69    1.27
  -4  -2   8   -0.04    0.95
  -4  -2   8    0.75    0.80
  -4  -2   8    0.82    0.96
   4   2  -8    0.74    1.28
  -4  -2   8    0.86    1.34
   4   2  -8    1.12    1.29
   4   2  -8    0.50    1.31
  -4  -2   7   79.97    4.96
   4   2  -7   77.52    4.79
   4   2  -7   93.06    5.45
  -4  -2   7   67.83    4.26
   4   2  -7   76.43    4.67
   4   2  -7   68.32    4.15
  -4  -2   7   73.77    4.17
   4   2  -7   91.01    5.44
  -4  -2   6   73.15    4.61
   4   2  -6   73.56    4.51
  -4  -2   6   71.25    4.12
   4   2  -6   78.04    4.95
   4   2  -6   70.91    3.95
   4   2  -6   66.27    3.89
   4   2  -6   80.87    5.05
  -4  -2   5   76.06    4.18
   4   2  -5   72.52    4.30
   4   2  -5   68.16    4.37
   4   2  -5   69.20    4.24
   4   2  -5   69.42    3.57
  -4  -2   5   69.78    3.66
   4   2  -5   68.00    3.96
   4   2  -5   68.23    4.38
   4   2  -4   21.41    2.27
  -4  -2   4   20.18    2.17
   4   2  -4   22.67    2.50
   4   2  -4   26.92    2.63
  -4  -2   4   18.94    1.84
   4   2  -4   19.51    2.27
   4   2  -4   24.78    2.61
  -4  -2   3  378.97    9.02
   4   2  -3  384.65   10.15
   4   2  -3  394.05   10.45
   4   2  -3  353.61    9.14
  -4  -2   3  376.19    9.13
   4   2  -3  373.18   10.23
   4   2  -3  417.88   10.67
  -4  -2   2  895.21   17.23
   4   2  -2  867.22   17.91
   4   2  -2  899.21   18.10
   4   2  -2  881.17   18.38
   4   2  -2  832.27   17.37
   4   2  -2  847.58   18.32
  -4  -2   2  830.80   16.67
   4   2  -2  856.88   18.40
   4   2  -2  886.40   18.46
  -4  -2   1 1511.79   26.88
   4   2  -1 1418.20   26.80
  -4  -2   1 1389.42   26.81
   4   2  -1 1481.53   26.77
   4   2  -1 1490.78   27.30
   4   2  -1 1402.92   26.53
   4   2  -1 1319.98   27.13
   4   2  -1 1518.74   27.28
  -4  -2   1 1428.49   25.73
   4   2  -1 1481.98   27.31
   4   2   0    2.48    1.06
   4   2   0    2.71    0.99
   4   2   0    2.01    0.95
   4   2   0    2.15    0.98
  -4  -2   0    2.05    0.84
   4   2   0    2.45    1.12
  -4  -2   0    2.70    0.97
   4   2   0    2.30    1.13
   4   2   0    2.36    0.91
  -4  -2   0    2.28    0.87
   4   2   0    2.20    0.98
   4   2   1 2057.07   36.54
   4   2   1 2039.73   36.04
   4   2   1 2030.47   36.43
   4   2   1 2073.73   36.15
  -4  -2  -1 1842.56   35.75
   4   2   1 2067.70   36.38
   4   2   1 2207.69   37.44
  -4  -2  -1 2057.79   35.97
   4   2   1 1966.84   35.17
  -4  -2  -1 2003.64   35.98
   4   2   1 2114.62   36.83
   4   2   1 2064.60   36.20
   4   2   2  165.84    5.62
   4   2   2  145.86    5.60
   4   2   2  181.28    6.75
  -4  -2  -2  161.60    5.88
  -4  -2  -2  162.88    6.12
   4   2   2  173.91    6.08
   4   2   2  165.51    5.65
   4   2   2  159.61    5.90
   4   2   3   56.23    3.62
   4   2   3   55.40    3.48
   4   2   3   52.14    3.04
   4   2   3   53.01    3.47
   4   2   3   60.61    3.76
   4   2   4  208.67    7.53
   4   2   4  189.35    6.98
   4   2   4  205.50    8.06
   4   2   4  223.43    8.03
   4   2   4  200.61    7.66
   4   2   5    5.33    1.56
   4   2   5    6.71    1.71
   4   2   5    7.27    1.81
   4   2   5    4.77    1.49
   4   2   5    4.95    1.45
   4   2   5    6.40    1.82
   4   2   6  192.03    7.37
   4   2   6  193.62    7.00
   4   2   6  187.13    7.37
   4   2   6  176.43    7.25
   4   2   6  204.58    7.57
   4   2   7   35.02    2.75
   4   2   7   34.87    2.95
   4   2   7   33.03    2.66
   4   2   7   26.79    2.33
  -4  -2  -7   32.49    3.20
   4   2   8  125.24    4.52
  -4  -2  -8  127.59    4.97
  -4  -2  -8  122.64    5.25
   4   3 -10   34.16    2.22
   4   3 -10   35.06    2.14
  -4  -3  10   29.86    2.06
   4   3  -9   28.31    2.63
   4   3  -9   29.94    2.65
   4   3  -9   25.52    2.25
  -4  -3   9   24.88    2.30
   4   3  -9   30.04    2.68
   4   3  -8   74.33    4.49
   4   3  -8   83.19    4.88
   4   3  -8   93.64    5.24
   4   3  -8   80.26    4.25
  -4  -3   8   78.49    4.36
   4   3  -8   91.82    5.20
  -4  -3   7  367.33   11.51
   4   3  -7  393.85   11.70
   4   3  -7  377.29   11.96
   4   3  -7  357.39   10.17
  -4  -3   7  389.48   11.01
   4   3  -7  387.59   12.14
  -4  -3   6   62.57    4.21
   4   3  -6   67.21    4.50
  -4  -3   6   57.03    3.58
   4   3  -6   73.58    4.82
   4   3  -6   64.29    4.35
   4   3  -6   63.82    3.56
  -4  -3   6   64.85    4.05
   4   3  -6   58.66    3.73
   4   3  -6   73.48    4.85
  -4  -3   5  202.46    6.75
  -4  -3   5  215.55    7.61
   4   3  -5  201.31    7.88
  -4  -3   5  212.59    7.18
   4   3  -5  220.52    8.35
   4   3  -5  217.77    8.09
  -4  -3   5  212.54    7.22
   4   3  -5  203.81    7.35
   4   3  -5  209.78    8.28
   4   3  -4   81.58    4.30
  -4  -3   4   84.92    4.21
  -4  -3   4   77.08    4.35
   4   3  -4   76.16    4.68
   4   3  -4   83.78    4.70
  -4  -3   4   80.15    4.15
   4   3  -4   83.71    4.53
   4   3  -4   77.17    4.70
  -4  -3   3  712.39   15.43
   4   3  -3  729.92   16.14
  -4  -3   3  756.36   16.40
  -4  -3   3  732.68   16.01
   4   3  -3  724.72   16.46
   4   3  -3  709.90   16.93
  -4  -3   3  714.65   15.45
   4   3  -3  710.22   16.47
   4   3  -3  706.47   16.96
  -4  -3   2   27.42    2.67
  -4  -3   2   26.87    2.28
   4   3  -2   34.17    2.65
   4   3  -2   28.27    2.48
   4   3  -2   25.17    2.54
   4   3  -2   27.63    2.31
  -4  -3   2   28.59    2.22
   4   3  -2   31.69    2.77
   4   3  -1 1194.91   24.09
  -4  -3   1 1217.96   23.30
   4   3  -1 1235.67   24.35
   4   3  -1 1162.95   23.47
   4   3  -1 1193.56   23.78
  -4  -3   1 1238.85   23.02
  -4  -3   1 1192.52   22.35
   4   3  -1 1231.81   24.41
   4   3   0  423.77   11.05
  -4  -3   0  478.60   11.59
   4   3   0  458.65   11.64
   4   3   0  372.19    9.61
   4   3   0  391.39   10.27
   4   3   0  403.66   11.09
   4   3   0  409.61   10.64
  -4  -3   0  441.90   10.64
  -4  -3   0  446.90   10.55
   4   3   0  427.91   11.48
   4   3   0  453.91   11.66
   4   3   1  131.46    5.59
  -4  -3  -1  128.89    5.83
   4   3   1  144.60    5.40
   4   3   1  136.64    5.69
   4   3   1  134.05    5.07
   4   3   1  136.62    6.14
   4   3   1  120.75    4.66
  -4  -3  -1  136.83    5.39
  -4  -3  -1  131.60    5.34
   4   3   1  127.30    5.65
   4   3   1  134.83    5.70
   4   3   2 1665.02   31.78
   4   3   2 1694.06   31.17
   4   3   2 1789.90   33.50
  -4  -3  -2 1773.26   32.00
  -4  -3  -2 1668.04   32.01
   4   3   2 1667.23   32.01
   4   3   2 1666.38   31.86
   4   3   2 1641.23   32.79
   4   3   3 1671.34   31.31
   4   3   3 1643.86   30.31
   4   3   3 1523.55   29.89
  -4  -3  -3 1722.13   31.29
  -4  -3  -3 1657.73   31.80
   4   3   3 1451.87   29.77
   4   3   3 1647.77   30.42
   4   3   4  173.92    6.97
   4   3   4  156.82    6.21
   4   3   4  170.48    7.54
  -4  -3  -4  178.40    7.00
  -4  -3  -4  170.78    7.22
   4   3   4  170.01    7.18
   4   3   5    4.00    1.55
   4   3   5    2.93    1.51
   4   3   5    2.19    1.28
   4   3   5    3.53    1.26
   4   3   5    7.88    1.98
  -4  -3  -5    3.17    1.70
  -4  -3  -5    3.14    1.39
   4   3   6  264.14    8.40
   4   3   6  296.72    9.74
  -4  -3  -6  308.85    9.59
  -4  -3  -6  306.68   10.01
   4   3   6  276.68    9.07
   4   3   6  320.66    9.85
   4   3   7   23.60    2.32
  -4  -3  -7   19.64    2.35
   4   3   7   22.41    1.91
   4   3   7   19.23    2.07
  -4  -3  -7   24.94    2.38
  -4  -3  -7   22.41    2.50
  -4  -3  -8   98.74    3.96
  -4  -4  10   57.61    2.99
   4   4  -9    0.19    0.79
  -4  -4   9    1.56    0.91
   4   4  -9    0.19    0.79
  -4  -4   9    0.66    0.97
   4   4  -9    0.33    1.03
   4   4  -8  321.12    9.89
  -4  -4   8  280.05    9.34
   4   4  -8  318.02    9.83
  -4  -4   8  278.89    9.07
   4   4  -8  308.97    9.80
   4   4  -7  118.66    5.98
  -4  -4   7  115.16    5.77
   4   4  -7  123.65    6.23
   4   4  -7  107.34    5.76
   4   4  -7  117.42    6.12
  -4  -4   6 1355.79   27.21
   4   4  -6 1408.18   28.97
  -4  -4   6 1296.14   28.10
   4   4  -6 1571.47   30.27
   4   4  -6 1390.88   29.08
  -4  -4   6 1478.19   28.40
   4   4  -6 1284.47   27.06
   4   4  -6 1595.61   30.45
  -4  -4   5  458.46   12.01
  -4  -4   5  427.51   11.98
  -4  -4   5  394.24   10.57
   4   4  -5  477.22   13.74
   4   4  -5  477.90   13.24
  -4  -4   5  509.98   12.62
   4   4  -5  451.53   12.37
   4   4  -5  482.74   13.83
  -4  -4   4  137.34    5.82
  -4  -4   4  132.97    5.26
  -4  -4   4  138.99    5.80
   4   4  -4  144.03    6.43
   4   4  -4  142.09    6.76
   4   4  -4  145.30    6.61
  -4  -4   4  157.84    6.12
   4   4  -4  145.38    6.39
   4   4  -4  141.01    6.78
  -4  -4   3 1407.84   27.79
   4   4  -3 1403.56   28.04
  -4  -4   3 1400.84   27.40
   4   4  -3 1457.06   28.70
   4   4  -3 1555.35   30.23
   4   4  -3 1416.91   29.18
  -4  -4   3 1498.09   28.18
   4   4  -3 1477.03   29.30
   4   4  -3 1569.43   30.37
   4   4  -2  138.07    5.88
  -4  -4   2  150.43    5.88
  -4  -4   2  145.61    6.08
  -4  -4   2  153.61    5.70
   4   4  -2  148.63    5.98
   4   4  -2  134.91    5.45
   4   4  -2  145.51    6.36
  -4  -4   2  140.54    5.25
  -4  -4   2  159.91    5.88
   4   4  -2  152.08    6.58
   4   4  -1   76.94    4.24
  -4  -4   1   88.69    4.44
   4   4  -1   79.01    4.01
   4   4  -1   88.18    4.97
   4   4  -1   75.74    4.25
   4   4  -1   78.96    4.42
  -4  -4   1   84.14    4.30
  -4  -4   1   85.15    4.08
   4   4  -1   90.30    5.06
   4   4   0  250.69    8.44
  -4  -4   0  246.43    8.24
   4   4   0  249.88    8.78
   4   4   0  220.48    8.33
   4   4   0  228.43    7.58
  -4  -4   0  247.75    8.06
  -4  -4   0  229.39    7.79
   4   4   0  250.10    8.68
   4   4   0  249.56    8.79
   4   4   1   37.88    3.21
  -4  -4  -1   41.17    3.39
   4   4   1   41.54    3.43
   4   4   1   39.65    3.50
  -4  -4  -1   46.79    3.27
  -4  -4  -1   40.24    3.23
   4   4   1   39.39    3.36
   4   4   1   42.95    3.49
  -4  -4  -2   19.42    2.67
  -4  -4  -2   21.35    2.42
   4   4   2   19.16    2.39
   4   4   2   19.83    2.69
  -4  -4  -2   19.04    2.42
   4   4   2   19.83    2.50
   4   4   2   17.14    2.31
   4   4   2   21.64    2.60
  -4  -4  -3  228.91    8.17
   4   4   3  227.29    7.97
   4   4   3  226.54    9.07
  -4  -4  -3  242.17    8.46
   4   4   3  198.48    7.38
   4   4   3  224.73    8.01
   4   4   3  215.10    8.54
  -4  -4  -4   39.56    3.31
  -4  -4  -4   36.47    3.46
   4   4   4   39.20    3.54
  -4  -4  -5    5.07    1.75
   4   4   5    3.67    1.33
   4   4   5    4.73    1.21
   4   4   5    7.62    1.95
  -4  -4  -5    7.05    1.87
  -4  -4  -5    7.37    1.73
   4   4   6  719.35   16.13
  -4  -4  -6  646.81   15.48
   4   4   6  647.00   15.95
  -4  -4  -6  703.77   15.92
  -4  -4  -6  666.03   15.78
   4   4   7   68.51    3.49
  -4  -4  -7   63.03    3.19
  -4  -4  -7   67.63    3.38
  -4  -4  -7   63.48    3.44
  -4  -5   9    6.84    1.21
  -4  -5   9    7.68    1.18
   4   5  -9    8.14    1.40
   4   5  -8    1.96    1.05
  -4  -5   8    1.23    1.00
   4   5  -8    2.17    1.10
  -4  -5   8    1.80    1.01
   4   5  -8    2.11    1.34
  -4  -5   7   57.22    3.44
   4   5  -7   69.92    4.41
  -4  -5   7   59.00    3.72
   4   5  -7   71.63    4.45
   4   5  -7   66.99    4.36
  -4  -5   6  406.19   11.21
  -4  -5   6  354.40   10.61
   4   5  -6  445.92   12.77
   4   5  -6  383.73   11.99
  -4  -5   6  432.63   11.84
   4   5  -6  381.83   10.65
   4   5  -6  452.83   12.88
  -4  -5   5 1248.01   25.53
   4   5  -5 1270.97   26.54
  -4  -5   5 1144.69   24.58
   4   5  -5 1278.18   27.22
   4   5  -5 1239.16   26.95
  -4  -5   5 1357.47   26.27
   4   5  -5 1250.66   25.77
   4   5  -5 1299.37   27.43
  -4  -5   4 3652.16   63.55
   4   5  -4 3601.00   64.24
  -4  -5   4 3285.99   62.22
   4   5  -4 4033.97   66.60
  -4  -5   4 3856.48   64.13
   4   5  -4 3621.08   64.47
   4   5  -4 4092.73   66.71
  -4  -5   3  118.40    5.51
   4   5  -3  103.40    5.08
   4   5  -3  118.33    5.62
  -4  -5   3  100.51    4.57
   4   5  -3  121.60    6.35
   4   5  -3  104.81    5.73
  -4  -5   3  111.72    5.01
  -4  -5   3  117.99    5.47
   4   5  -3  116.24    5.94
   4   5  -3  116.33    6.29
   4   5  -2  186.79    7.19
  -4  -5   2  203.11    7.44
  -4  -5   2  186.86    6.29
   4   5  -2  192.71    7.11
   4   5  -2  189.93    7.69
  -4  -5   2  200.95    6.91
  -4  -5   2  216.07    7.51
   4   5  -2  206.16    8.14
  -4  -5   1  643.92   16.18
   4   5  -1  775.95   17.48
  -4  -5   1  791.22   17.51
  -4  -5   1  751.93   15.87
   4   5  -1  707.04   16.04
   4   5  -1  714.90   17.02
   4   5  -1  730.50   17.40
  -4  -5   1  855.85   17.71
  -4  -5   1  760.30   16.95
   4   5  -1  802.81   18.73
   4   5   0   13.02    2.05
  -4  -5   0   12.31    2.17
   4   5   0   13.00    2.37
   4   5   0   14.18    2.21
   4   5   0   10.60    1.74
  -4  -5   0   14.63    2.08
  -4  -5   0   13.50    1.96
   4   5   0   11.79    2.27
   4   5   0   14.12    2.39
   4   5   1  604.79   15.36
  -4  -5  -1  598.50   15.44
   4   5   1  607.38   16.11
   4   5   1  588.69   15.71
  -4  -5  -1  598.05   15.16
   4   5   1  601.26   15.91
   4   5   1  605.73   16.19
   4   5   2   49.78    4.03
   4   5   2   53.04    4.03
   4   5   2   49.46    4.08
  -4  -5  -2   53.02    3.77
  -4  -5  -2   48.62    3.75
   4   5   2   47.18    3.78
   4   5   2   54.41    4.08
   4   5   3   39.64    3.48
   4   5   3   44.22    3.51
   4   5   3   40.01    3.75
  -4  -5  -3   42.99    3.46
  -4  -5  -3   42.16    3.43
   4   5   3   37.07    3.05
   4   5   3   40.27    3.39
   4   5   4   64.53    4.32
  -4  -5  -4   57.23    3.90
   4   5   4   55.90    3.53
   4   5   4   59.74    4.39
  -4  -5  -4   61.83    3.95
  -4  -5  -4   60.77    4.04
   4   5   4   55.85    3.55
   4   5   5   91.44    4.87
  -4  -5  -5   84.69    4.40
  -4  -5  -5   97.13    4.63
  -4  -5  -5   88.12    4.64
  -4  -5  -6  193.87    6.03
   4   5   6  188.56    6.66
  -4  -5  -6  197.87    6.47
  -4  -6   8    0.37    0.77
   4   6  -8    1.05    1.02
  -4  -6   7   27.08    2.22
   4   6  -7   29.87    2.64
   4   6  -7   28.45    2.58
  -4  -6   6   42.58    3.25
   4   6  -6   45.11    3.60
  -4  -6   6   46.97    3.40
   4   6  -6   38.10    2.71
   4   6  -6   44.06    3.56
  -4  -6   5   82.93    4.69
   4   6  -5   87.60    4.93
   4   6  -5   90.79    5.24
  -4  -6   5   85.54    4.72
   4   6  -5   80.87    4.50
   4   6  -5   87.31    5.17
  -4  -6   4   69.42    4.33
   4   6  -4   70.15    4.37
   4   6  -4   67.74    4.77
   4   6  -4   63.74    4.49
  -4  -6   4   74.32    4.44
   4   6  -4   69.97    4.59
   4   6  -4   73.86    5.01
  -4  -6   3   94.24    5.09
   4   6  -3   93.58    4.95
   4   6  -3  111.30    6.12
   4   6  -3   89.80    5.29
  -4  -6   3   96.33    4.81
  -4  -6   3   99.37    5.19
   4   6  -3   98.04    5.51
   4   6  -3  108.32    6.07
  -4  -6   2    5.27    1.51
   4   6  -2    0.87    0.93
  -4  -6   2    0.75    1.25
   4   6  -2    0.50    1.48
   4   6  -2    1.24    1.27
  -4  -6   2    0.69    1.09
   4   6  -2    1.19    1.11
   4   6  -2    0.52    1.50
   4   6  -2    0.50    1.56
   4   6  -1   19.60    2.23
  -4  -6   1   19.42    2.52
   4   6  -1   17.57    2.14
   4   6  -1   14.68    2.11
  -4  -6   1   21.09    2.44
  -4  -6   1   20.77    2.44
   4   6  -1   20.17    2.84
   4   6   0  602.35   14.97
  -4  -6   0  591.35   15.06
   4   6   0  637.14   16.76
   4   6   0  558.29   14.83
  -4  -6   0  667.64   15.42
  -4  -6   0  627.90   15.04
   4   6   0  590.70   15.98
   4   6   0  631.59   16.75
   4   6   1  268.60    8.96
  -4  -6  -1  273.79    8.93
   4   6   1  294.55   10.14
   4   6   1  252.44    9.19
  -4  -6  -1  297.10    9.27
  -4  -6  -1  277.85    9.02
   4   6   1  264.41    9.43
   4   6   1  302.69   10.29
   4   6   2   33.22    3.07
   4   6   2   33.55    3.21
  -4  -6  -2   34.09    2.96
  -4  -6  -2   33.02    2.98
   4   6   2   29.47    2.90
   4   6   2   32.62    3.20
   4   6   3   61.48    4.09
  -4  -6  -3   61.87    3.77
   4   6   3   71.52    4.17
   4   6   3   62.56    4.30
  -4  -6  -3   65.21    3.93
  -4  -6  -3   65.00    3.96
   4   6   3   56.05    3.48
   4   6   3   70.22    4.20
   4   6   4  288.55    8.72
  -4  -6  -4  268.32    7.98
   4   6   4  276.69    7.72
   4   6   4  261.69    8.91
  -4  -6  -4  296.15    8.46
  -4  -6  -4  284.88    8.50
   4   6   4  278.98    7.77
   4   6   5  396.88    9.95
  -4  -6  -5  369.71    8.93
  -4  -6  -5  395.21    9.64
  -4  -6  -5  377.88    9.63
  -4  -7   7    5.39    1.12
   4   7  -6  553.97   12.80
   4   7  -6  555.86   12.82
  -4  -7   6  524.78   12.39
   4   7  -6  552.03   12.78
  -4  -7   5   14.17    1.98
   4   7  -5   14.77    1.99
   4   7  -5   15.79    2.15
  -4  -7   5   14.47    1.96
   4   7  -5   14.66    1.84
   4   7  -5   14.73    2.09
  -4  -7   4   95.76    4.97
   4   7  -4  107.17    4.87
   4   7  -4  107.94    5.52
  -4  -7   4  107.65    5.10
   4   7  -4  103.74    5.11
   4   7  -4  116.19    5.73
  -4  -7   3   30.35    2.90
   4   7  -3   30.64    2.57
   4   7  -3   34.68    3.31
  -4  -7   3   30.83    2.60
  -4  -7   3   32.39    2.89
   4   7  -3   35.01    3.16
   4   7  -3   36.89    3.42
  -4  -7   2    6.99    1.68
  -4  -7   2    7.01    1.69
   4   7  -2    7.77    1.96
  -4  -7   2    8.00    1.64
   4   7  -2    8.80    1.99
   4   7  -2    6.98    1.91
  -4  -7   1  477.45   12.76
  -4  -7   1  475.45   12.60
  -4  -7   1  494.34   12.69
   4   7  -1  515.45   13.68
   4   7   0   84.05    4.06
  -4  -7   0   81.18    4.43
   4   7   0   92.97    5.26
   4   7   0   75.07    4.04
  -4  -7   0   90.96    4.57
  -4  -7   0   92.23    4.67
   4   7   0   86.80    4.95
   4   7   0   92.44    5.28
   4   7   1   21.99    2.22
   4   7   1   24.53    2.73
   4   7   1   20.69    2.34
  -4  -7  -1   24.37    2.45
  -4  -7  -1   22.27    2.33
   4   7   1   21.56    2.50
   4   7   1   23.07    2.66
   4   7   2   35.22    2.68
  -4  -7  -2   35.53    2.70
   4   7   2   39.56    3.11
   4   7   2   33.30    2.82
  -4  -7  -2   39.74    2.89
  -4  -7  -2   34.08    2.80
   4   7   2   36.76    2.81
   4   7   2   39.81    3.10
   4   7   3   57.80    3.23
  -4  -7  -3   55.44    3.06
   4   7   3   58.83    3.23
   4   7   3   53.79    3.37
  -4  -7  -3   57.24    3.18
  -4  -7  -3   57.03    3.25
   4   7   3   46.68    2.53
   4   7   3   55.09    3.19
  -4  -7  -4   81.60    3.24
   4   7   4   82.11    3.80
  -4  -7  -4   87.25    3.58
  -4  -7  -4   82.33    3.62
  -4  -8   5   31.62    2.30
   4   8  -5   33.07    2.28
  -4  -8   5   28.32    2.15
   4   8  -5   32.63    2.28
  -4  -8   4  113.72    4.74
   4   8  -4  114.63    4.85
   4   8  -4  113.27    4.39
   4   8  -4  119.81    4.95
  -4  -8   3    4.18    1.14
  -4  -8   3    5.02    1.27
   4   8  -3    4.60    1.32
   4   8  -3    4.65    1.25
   4   8  -3    4.66    1.33
  -4  -8   2  404.53   10.47
   4   8  -2  419.64   11.30
  -4  -8   2  397.81    9.87
  -4  -8   2  409.72   10.31
   4   8  -2  422.35   10.92
   4   8  -2  429.96   11.37
  -4  -8   1  139.94    5.39
   4   8  -1  150.97    6.05
  -4  -8   1  146.23    5.38
  -4  -8   1  154.89    5.48
   4   8  -1  160.62    5.98
   4   8  -1  149.57    6.05
  -4  -8   0    3.99    1.09
   4   8   0    4.39    1.25
  -4  -8   0    4.30    1.19
   4   8   0    5.12    1.31
   4   8   0    4.65    1.29
  -4  -8  -1  189.33    6.03
   4   8   1  213.12    6.67
  -4  -8  -1  210.29    6.37
  -4  -8  -1  209.14    6.18
   4   8   1  199.44    6.24
   4   8   1  211.12    6.70
  -4  -8  -2   17.77    1.57
  -4  -8  -2   19.45    1.74
  -4  -8  -2   18.31    1.61
   5  -9  -1   41.66    2.47
   5  -9   0  273.93    6.76
   5  -9   0  235.41    6.73
   5  -9   1   11.60    1.39
  -5   8   4   33.34    2.36
   5  -8  -4   27.86    2.28
  -5   8   3   26.91    2.21
   5  -8  -3   26.74    2.00
   5  -8  -3   25.22    2.32
  -5   8   2   73.52    3.65
   5  -8  -2   76.78    3.64
   5  -8  -2   73.88    4.01
  -5   8   1    0.61    0.78
   5  -8  -1    0.79    1.15
   5  -8  -1    1.26    0.98
   5  -8   0   64.96    3.49
   5  -8   0   60.18    3.71
   5  -8   1  454.68   10.66
  -5   8  -1  402.37   10.08
   5  -8   2    0.48    0.85
   5  -8   3    1.36    0.92
   5  -8   3    0.53    0.79
   5  -8   4   91.98    3.77
   5  -7  -6   13.08    1.68
   5  -7  -5   72.69    3.93
  -5   7   5   87.34    4.19
   5  -7  -5   76.66    3.24
   5  -7  -5   83.84    4.30
   5  -7  -5   72.60    3.92
   5  -7  -4  336.06    9.89
  -5   7   4  407.03   10.67
   5  -7  -4  355.68    9.36
   5  -7  -4  384.18   10.72
   5  -7  -4  383.02   10.98
   5  -7  -4  344.75    9.87
  -5   7   3  840.34   18.40
   5  -7  -3  795.56   17.42
   5  -7  -3  823.55   18.76
  -5   7   2   72.70    4.20
   5  -7  -2   70.59    4.00
  -5   7   1  197.10    7.06
   5  -7  -1  206.46    7.21
  -5   7   0  522.45   12.93
  -5   7   0  548.13   17.74
   5  -7   1   83.94    4.77
   5  -7   1   89.54    4.53
   5  -7   2  150.49    5.71
   5  -7   2  127.71    5.89
   5  -7   3  741.18   16.03
   5  -7   3  874.95   18.09
   5  -7   4  310.26    8.04
   5  -7   4  292.34    8.61
   5  -7   5   25.33    2.04
   5  -7   5   26.38    2.16
   5  -6  -7    5.63    1.36
  -5   6   7    6.38    1.20
   5  -6  -7    5.55    1.37
  -5   6   7    7.03    1.24
   5  -6  -7    6.58    1.41
   5  -6  -6    7.59    1.66
  -5   6   6    6.50    1.32
   5  -6  -6    7.85    1.68
  -5   6   6    7.60    1.48
   5  -6  -6    6.38    1.59
   5  -6  -6    6.67    1.52
   5  -6  -5 1019.15   22.33
   5  -6  -5 1020.16   20.73
   5  -6  -5 1088.09   22.40
   5  -6  -5 1094.64   22.16
   5  -6  -5 1025.10   22.33
   5  -6  -4  222.10    8.19
  -5   6   4  247.17    8.60
   5  -6  -4  227.20    7.75
   5  -6  -4  207.12    7.59
   5  -6  -4  234.89    8.66
  -5   6   4  229.27    7.32
   5  -6  -4  228.58    8.29
   5  -6  -3   63.66    3.99
   5  -6  -3   57.56    3.92
   5  -6  -3   67.03    4.16
   5  -6  -3   63.60    4.18
   5  -6  -3   75.06    4.83
   5  -6  -3   64.71    4.02
   5  -6  -2  881.59   18.99
   5  -6  -2  790.71   17.43
   5  -6  -2  858.61   19.31
   5  -6  -2  756.72   18.37
   5  -6  -2  789.84   17.41
   5  -6  -1  415.31   12.34
   5  -6  -1  472.21   12.48
   5  -6  -1  435.92   12.66
   5  -6  -1  455.61   12.98
   5  -6   0  287.75    9.81
   5  -6   0  304.57   10.03
   5  -6   0  321.48    9.87
   5  -6   1  614.65   16.23
  -5   6  -1  628.76   19.74
   5  -6   1  651.38   16.23
   5  -6   2    5.55    1.67
  -5   6  -2    5.73    2.37
   5  -6   2    3.92    1.37
   5  -6   2    5.94    1.68
   5  -6   2    3.48    1.21
   5  -6   2    5.65    1.48
   5  -6   3   67.49    4.59
  -5   6  -3   79.35    5.55
   5  -6   3   84.06    4.16
   5  -6   3   74.12    4.04
   5  -6   3   78.41    4.52
   5  -6   4   26.20    2.23
   5  -6   4   26.51    2.56
   5  -6   4   28.55    2.32
   5  -6   4   25.40    2.56
   5  -6   5   55.21    3.26
   5  -6   5   59.27    3.56
   5  -6   5   53.38    3.32
   5  -6   6  142.90    4.96
   5  -6   6  154.37    5.42
   5  -5  -8  215.71    7.55
   5  -5  -8  226.44    6.97
  -5   5   8  232.59    6.80
   5  -5  -8  211.33    7.46
  -5   5   7   42.27    2.87
   5  -5  -7   47.82    3.42
  -5   5   7   44.39    3.17
   5  -5  -6  295.21   10.03
  -5   5   6  267.95    8.66
   5  -5  -6  255.27    8.19
   5  -5  -6  254.97    8.72
  -5   5   6  281.17    8.95
   5  -5  -6  300.68   10.10
   5  -5  -5  481.32   13.69
   5  -5  -5  484.52   12.56
   5  -5  -5  424.32   12.04
   5  -5  -5  440.00   12.66
  -5   5   5  434.26   12.08
   5  -5  -5  476.46   13.68
   5  -5  -4    1.21    1.31
  -5   5   4    0.98    1.13
   5  -5  -4    0.72    1.23
   5  -5  -4    0.16    0.99
   5  -5  -4    0.30    1.02
   5  -5  -4   -0.05    1.29
   5  -5  -4    0.49    1.37
   5  -5  -3   81.31    4.77
   5  -5  -3   76.96    4.32
   5  -5  -3  100.69    5.21
   5  -5  -3   90.08    5.25
   5  -5  -3   90.53    5.19
   5  -5  -3   97.95    5.36
  -5   5   3   77.39    4.26
   5  -5  -3   79.53    4.72
   5  -5  -2    7.54    1.53
  -5   5   2    7.25    1.39
   5  -5  -2    7.86    1.53
   5  -5  -2    7.15    1.62
   5  -5  -2    9.15    1.94
   5  -5  -2    6.82    1.81
   5  -5  -2    8.71    1.99
   5  -5  -1 1157.32   23.38
   5  -5  -1 1185.40   24.10
   5  -5  -1 1131.73   23.43
   5  -5   0 2398.82   46.92
   5  -5   0 2652.60   48.10
   5  -5   1    2.02    1.32
   5  -5   1    0.73    1.05
   5  -5   1    0.41    0.98
   5  -5   1   -0.14    1.17
   5  -5   1    0.86    1.05
   5  -5   1    0.82    1.15
   5  -5   2   19.38    2.51
   5  -5   2   23.05    2.30
   5  -5   2   22.78    2.25
   5  -5   2   19.14    2.43
   5  -5   2   23.28    2.28
   5  -5   3  168.32    6.14
   5  -5   3  164.28    6.99
  -5   5  -3  165.53    8.43
   5  -5   3  171.68    6.16
   5  -5   3  161.50    6.38
   5  -5   3  159.01    6.58
   5  -5   4  232.27    7.70
   5  -5   4  230.60    7.98
   5  -5   4  216.84    6.76
   5  -5   5   53.80    3.53
   5  -5   5   53.86    3.69
   5  -5   5   47.85    3.21
   5  -5   6  202.84    6.76
   5  -5   6  205.50    6.99
   5  -5   7   61.45    3.23
   5  -5   7   57.78    3.24
   5  -4  -9  202.68    6.85
   5  -4  -9  198.22    6.77
   5  -4  -8  316.32    9.81
  -5   4   8  300.81    8.77
   5  -4  -8  298.30    9.61
  -5   4   7    3.87    1.42
  -5   4   7    3.69    1.27
   5  -4  -7    2.63    1.11
   5  -4  -7    3.65    1.22
   5  -4  -6  737.70   18.77
  -5   4   6  688.26   16.65
   5  -4  -6  743.85   17.24
   5  -4  -6  729.42   17.54
   5  -4  -6  683.46   16.82
  -5   4   6  770.45   17.68
   5  -4  -6  733.52   18.75
  -5   4   5  713.48   16.96
   5  -4  -5  782.85   19.39
   5  -4  -5  852.31   18.84
   5  -4  -5  723.22   17.90
   5  -4  -5  783.43   18.45
   5  -4  -5  761.69   18.21
  -5   4   5  785.94   18.24
   5  -4  -5  785.17   19.45
   5  -4  -4    4.09    1.55
  -5   4   4    5.52    1.50
  -5   4   4    4.21    1.18
   5  -4  -4    4.34    1.64
   5  -4  -4    5.47    1.28
   5  -4  -4    2.68    1.53
   5  -4  -4    5.01    1.58
   5  -4  -4    4.47    1.63
   5  -4  -4    4.72    1.64
   5  -4  -4    4.62    1.73
  -5   4   3   42.24    2.90
   5  -4  -3   37.31    3.24
   5  -4  -3   49.47    3.77
   5  -4  -3   41.04    2.86
   5  -4  -3   43.02    3.65
   5  -4  -3   46.26    3.61
   5  -4  -3   45.68    3.57
   5  -4  -3   47.50    3.69
   5  -4  -3   41.92    3.41
   5  -4  -2   54.32    3.50
   5  -4  -2   64.84    4.18
   5  -4  -2   53.21    3.27
   5  -4  -2   62.07    4.05
   5  -4  -2   57.30    3.93
   5  -4  -2   52.86    3.47
   5  -4  -1  984.98   21.47
   5  -4  -1 1233.75   23.44
   5  -4  -1 1134.55   23.21
   5  -4  -1 1040.06   22.73
   5  -4  -1 1137.02   23.07
   5  -4   0  135.78    5.56
   5  -4   0  140.62    6.08
   5  -4   0  152.92    6.34
   5  -4   0  157.39    6.23
   5  -4   0  136.61    5.97
   5  -4   0  148.51    5.92
   5  -4   1  385.02   10.90
   5  -4   1  442.08   11.40
   5  -4   1  470.09   11.59
   5  -4   1  431.68   11.87
   5  -4   1  392.82   11.09
   5  -4   1  394.50   10.89
   5  -4   2   13.91    1.70
   5  -4   2   15.15    1.55
   5  -4   2   15.53    2.06
   5  -4   2   14.36    1.85
   5  -4   2   14.07    1.86
   5  -4   2   15.17    1.98
   5  -4   2   13.56    1.82
   5  -4   2   14.70    2.01
   5  -4   2   13.48    1.71
   5  -4   3  225.12    7.37
   5  -4   3  235.42    6.56
   5  -4   3  204.96    7.57
  -5   4  -3  201.67    9.13
   5  -4   3  192.40    6.57
   5  -4   3  210.26    6.72
   5  -4   3  213.34    7.39
   5  -4   3  192.52    7.02
   5  -4   4  861.37   18.30
   5  -4   4  891.23   16.80
  -5   4  -4  758.93   20.72
   5  -4   4  851.86   18.48
   5  -4   4  742.04   15.88
   5  -4   4  699.16   16.88
   5  -4   5   89.17    4.80
   5  -4   5   91.05    3.99
  -5   4  -5   89.37    5.87
   5  -4   5   83.16    4.72
   5  -4   6  483.99   12.72
   5  -4   6  507.45   11.34
   5  -4   6  480.85   12.81
   5  -4   7   67.54    3.72
   5  -4   7   69.82    3.09
   5  -4   7   67.46    3.83
   5  -4   8  242.70    6.73
   5  -4   8  255.43    6.88
   5  -3  -9  151.55    6.42
   5  -3  -9  140.24    5.56
  -5   3   9  140.04    5.42
   5  -3  -9  150.20    6.37
   5  -3  -8  326.78   10.59
   5  -3  -8  298.27    9.33
   5  -3  -8  317.91   10.50
   5  -3  -7  257.06    9.72
  -5   3   7  224.32    8.27
  -5   3   7  207.96    7.14
   5  -3  -7  220.94    7.96
   5  -3  -7  237.27    8.41
   5  -3  -7  217.11    7.44
  -5   3   7  252.78    8.76
   5  -3  -7  256.44    9.74
  -5   3   6   28.75    2.83
   5  -3  -6   31.05    3.09
   5  -3  -6   25.55    2.67
   5  -3  -6   27.16    2.94
   5  -3  -6   26.72    2.73
  -5   3   6   28.00    3.00
  -5   3   5  258.81    8.67
   5  -3  -5  279.17    9.96
   5  -3  -5  278.39    9.38
   5  -3  -5  239.00    8.68
   5  -3  -5  263.34    9.03
   5  -3  -5  236.38    8.62
   5  -3  -5  274.01    9.90
  -5   3   4  623.06   14.61
   5  -3  -4  578.35   15.40
   5  -3  -4  592.60   15.14
   5  -3  -4  592.93   15.12
   5  -3  -4  605.08   14.93
   5  -3  -4  607.00   15.16
   5  -3  -4  570.11   15.36
   5  -3  -3    8.56    1.74
   5  -3  -3    8.32    2.04
  -5   3   3    8.25    1.52
   5  -3  -3    7.64    1.69
   5  -3  -3    7.85    1.16
   5  -3  -3    7.61    1.80
   5  -3  -3    7.51    1.74
   5  -3  -3   10.41    1.84
   5  -3  -3    8.78    1.82
   5  -3  -3    8.34    1.88
   5  -3  -2    5.11    1.28
   5  -3  -2    1.01    1.30
  -5   3   2    1.83    0.96
   5  -3  -2    4.50    1.25
   5  -3  -2    2.22    0.85
   5  -3  -2    1.45    1.25
   5  -3  -2    5.46    1.48
   5  -3  -2    2.64    1.19
  -5   3   1  174.70    6.22
   5  -3  -1  143.14    5.32
   5  -3  -1  187.99    6.81
   5  -3  -1  169.94    5.55
   5  -3  -1  172.79    5.37
   5  -3  -1  169.53    6.22
   5  -3  -1  194.40    6.75
   5  -3  -1  146.84    5.38
  -5   3   0 2523.09   45.79
   5  -3   0 2499.10   45.65
   5  -3   0 2711.98   44.58
   5  -3   0 2851.38   46.83
   5  -3   0 2422.34   44.34
   5  -3   0 2702.82   47.39
   5  -3   0 2547.46   45.65
   5  -3   0 2821.60   46.30
  -5   3  -1  232.59    7.79
   5  -3   1  203.94    6.67
   5  -3   1  234.39    6.59
   5  -3   1  285.51    7.29
   5  -3   1  225.94    6.89
   5  -3   1  255.51    7.82
   5  -3   1  258.80    7.92
   5  -3   1  246.36    8.12
   5  -3   1  218.61    7.06
   5  -3   1  229.51    7.33
   5  -3   2  648.55   14.42
   5  -3   2  711.69   14.40
   5  -3   2  638.15   14.48
   5  -3   2  670.27   14.47
   5  -3   2  658.34   15.03
   5  -3   2  698.76   15.12
   5  -3   2  642.63   14.39
   5  -3   2  613.46   14.12
   5  -3   2  597.86   13.83
   5  -3   3    3.63    1.35
   5  -3   3    3.12    0.91
  -5   3  -3    2.22    1.45
   5  -3   3    4.40    1.16
   5  -3   3    3.10    0.96
   5  -3   3    3.26    1.30
   5  -3   3    2.59    1.05
   5  -3   3    3.61    1.01
   5  -3   4   27.54    2.72
   5  -3   4   23.28    2.01
   5  -3   4   25.89    2.34
  -5   3  -4   26.23    3.19
   5  -3   4   24.80    2.63
   5  -3   4   21.47    2.01
   5  -3   5   42.86    3.41
   5  -3   5   43.81    3.08
  -5   3  -5   38.92    3.66
   5  -3   5   41.51    3.43
   5  -3   6    3.95    1.47
   5  -3   6    6.72    1.41
   5  -3   6    3.22    1.50
   5  -3   7    7.55    1.61
   5  -3   7    6.48    1.29
   5  -3   7    7.16    1.64
   5  -3   8  199.54    5.59
   5  -3   8  181.71    5.96
   5  -2 -10  129.40    4.84
   5  -2 -10  114.60    4.35
  -5   2  10  109.48    4.04
   5  -2 -10  129.35    4.86
   5  -2  -9  107.85    5.37
   5  -2  -9   93.79    4.59
  -5   2   9   92.62    4.42
   5  -2  -9  106.68    5.33
  -5   2   8  285.29    8.59
   5  -2  -8  314.30   10.71
   5  -2  -8  274.28    8.77
   5  -2  -8  290.03    9.42
  -5   2   8  289.70    9.49
   5  -2  -8  312.74   10.68
  -5   2   7  762.43   17.54
   5  -2  -7  862.77   20.63
  -5   2   7  805.32   18.89
   5  -2  -7  784.44   18.47
   5  -2  -7  807.06   18.80
   5  -2  -7  741.05   17.04
   5  -2  -7  871.26   20.67
  -5   2   6 1123.40   23.56
  -5   2   6 1220.52   25.16
   5  -2  -6 1210.85   25.46
   5  -2  -6 1126.64   24.55
   5  -2  -6 1220.19   25.10
   5  -2  -6 1175.86   24.20
  -5   2   5  896.73   19.29
  -5   2   5  970.37   20.67
   5  -2  -5  946.03   20.83
   5  -2  -5  907.92   20.57
   5  -2  -5  913.23   20.22
   5  -2  -5  855.08   19.82
  -5   2   4  498.51   12.11
  -5   2   4  554.98   13.45
   5  -2  -4  482.74   13.55
   5  -2  -4  515.98   13.41
   5  -2  -4  481.10   13.27
   5  -2  -4  516.08   12.79
   5  -2  -4  455.47   12.75
   5  -2  -4  485.16   13.55
  -5   2   3  861.54   18.11
  -5   2   3  824.48   17.09
   5  -2  -3  740.01   17.67
   5  -2  -3  835.52   18.34
   5  -2  -3  788.42   17.71
   5  -2  -3  808.24   18.32
   5  -2  -3  835.50   17.38
   5  -2  -3  750.61   17.80
   5  -2  -3  742.98   17.71
   5  -2  -2  301.34    9.21
  -5   2   2  300.67    8.81
   5  -2  -2  240.78    7.87
   5  -2  -2  291.67    8.96
   5  -2  -2  270.45    7.97
   5  -2  -2  238.92    7.90
  -5   2   1    9.69    1.72
   5  -2  -1    8.43    1.63
   5  -2  -1    7.77    1.26
   5  -2  -1    9.03    1.67
   5  -2  -1    7.33    1.32
   5  -2  -1    7.15    1.51
   5  -2  -1    8.92    1.69
   5  -2  -1    7.12    1.31
   5  -2  -1    9.15    1.63
   5  -2  -1    7.70    1.27
   5  -2   0  422.50   11.07
   5  -2   0  470.47   11.67
   5  -2   0  490.26   10.75
   5  -2   0  497.35   11.74
   5  -2   0  424.90   10.11
   5  -2   0  474.27   11.39
  -5   2   0  468.04   12.37
   5  -2   1  255.48    7.55
   5  -2   1  260.04    7.23
   5  -2   1  287.56    7.84
   5  -2   1  278.33    8.04
   5  -2   1  243.51    6.59
   5  -2   1  279.45    8.16
   5  -2   1  294.59    8.38
   5  -2   1  234.29    6.77
   5  -2   1  270.96    7.83
   5  -2   2   46.29    2.79
   5  -2   2   52.77    2.98
   5  -2   2   49.83    3.13
   5  -2   2   48.06    3.07
   5  -2   2   46.41    2.79
   5  -2   2   50.89    3.20
   5  -2   2   49.22    3.00
   5  -2   2   50.38    3.03
   5  -2   2   41.81    2.64
   5  -2   3  503.52   11.59
   5  -2   3  464.09   12.43
   5  -2   3  529.55   12.35
   5  -2   3  492.62   11.89
   5  -2   3  456.11   10.77
   5  -2   3  469.09   12.07
   5  -2   4   51.88    3.10
   5  -2   4   54.19    3.74
   5  -2   4   55.18    3.54
   5  -2   4   51.55    3.11
   5  -2   4   58.79    3.90
   5  -2   5 1557.14   29.36
   5  -2   5 1707.91   31.85
   5  -2   5 1756.13   31.22
   5  -2   5 1521.68   28.53
   5  -2   5 1564.03   31.39
   5  -2   6   71.76    4.38
   5  -2   6   71.80    4.13
   5  -2   6   72.24    4.48
   5  -2   7   84.23    4.22
   5  -2   7   66.75    4.06
   5  -2   8  263.16    7.54
   5  -2   8  281.68    7.38
   5  -1 -10  600.25   12.86
   5  -1 -10  504.72   11.58
  -5   1  10  486.21   10.90
   5  -1 -10  599.29   12.87
  -5   1   9   46.94    3.16
   5  -1  -9   45.34    3.70
   5  -1  -9   44.14    2.88
   5  -1  -9   42.18    3.10
  -5   1   9   46.46    3.08
   5  -1  -9   50.55    3.83
  -5   1   8  193.60    7.36
   5  -1  -8  216.90    8.61
  -5   1   8  199.74    7.87
   5  -1  -8  189.97    7.29
   5  -1  -8  184.12    7.25
  -5   1   8  192.31    7.24
   5  -1  -8  217.87    8.66
  -5   1   7  237.78    8.40
   5  -1  -7  268.09    9.94
   5  -1  -7  222.10    8.34
   5  -1  -7  218.77    8.08
   5  -1  -7  245.61    8.48
   5  -1  -7  210.78    7.27
   5  -1  -7  256.27    9.77
  -5   1   6  107.11    5.28
  -5   1   6  103.16    5.42
   5  -1  -6  109.48    6.15
   5  -1  -6   97.48    5.41
   5  -1  -6  100.42    5.40
   5  -1  -6  107.95    5.34
   5  -1  -6   94.29    4.86
   5  -1  -6  111.41    6.23
  -5   1   5  109.50    5.21
   5  -1  -5  111.58    5.72
   5  -1  -5  125.57    5.93
   5  -1  -5  118.81    5.34
   5  -1  -5  106.89    5.35
  -5   1   4   61.06    3.72
  -5   1   4   64.83    4.09
   5  -1  -4   60.87    4.14
   5  -1  -4   60.29    4.03
   5  -1  -4   58.90    3.63
   5  -1  -4   56.35    4.00
   5  -1  -4   56.64    3.42
   5  -1  -4   61.72    4.03
   5  -1  -4   58.43    4.08
  -5   1   3   62.02    3.95
   5  -1  -3   52.04    3.56
   5  -1  -3   54.21    3.38
   5  -1  -3   54.87    3.76
   5  -1  -3   53.46    3.12
   5  -1  -3   54.20    3.69
   5  -1  -3   50.39    3.53
  -5   1   2  802.82   17.95
   5  -1  -2  701.84   15.93
   5  -1  -2  750.79   16.49
   5  -1  -2  787.43   16.30
   5  -1  -2  669.80   14.71
   5  -1  -2  725.85   16.50
   5  -1  -2  705.40   16.01
   5  -1  -1    4.03    1.08
   5  -1  -1    5.00    1.37
  -5   1   1    3.96    1.47
   5  -1  -1    4.99    1.11
   5  -1  -1    4.23    1.16
   5  -1  -1    4.08    1.22
   5  -1  -1    6.60    1.54
   5  -1  -1    4.70    1.36
   5  -1  -1    4.58    1.37
   5  -1   0  612.73   13.80
   5  -1   0  534.14   12.14
   5  -1   0  605.52   13.44
   5  -1   0  557.75   13.51
   5  -1   0  576.48   13.81
   5  -1   0  613.57   14.07
   5  -1   0  624.91   13.92
   5  -1   1   25.36    2.31
   5  -1   1   27.35    2.15
   5  -1   1   28.21    2.35
   5  -1   1   26.24    2.20
   5  -1   1   30.10    2.57
   5  -1   1   25.75    2.24
   5  -1   1   24.32    1.96
   5  -1   1   27.83    2.36
   5  -1   2   76.05    3.81
   5  -1   2   83.10    3.97
   5  -1   2   77.74    4.01
   5  -1   2   72.71    4.05
   5  -1   2   80.72    4.26
   5  -1   2   71.17    3.53
   5  -1   2   78.00    3.81
   5  -1   2   74.92    3.62
   5  -1   3  225.19    7.01
   5  -1   3  238.18    7.98
   5  -1   3  229.45    7.71
   5  -1   3  237.23    7.84
   5  -1   3  242.75    7.81
   5  -1   4   27.59    2.17
   5  -1   4   26.80    2.75
   5  -1   4   28.51    2.57
   5  -1   4   28.70    2.81
   5  -1   5  239.00    7.82
   5  -1   5  241.18    8.61
   5  -1   5  244.41    7.44
   5  -1   5  226.33    8.34
   5  -1   6    3.18    1.16
   5  -1   6    1.21    1.38
   5  -1   7    9.35    1.77
   5  -1   7    8.45    1.75
   5  -1   8    5.06    1.22
   5  -1   8    3.55    1.16
  -5   0  10  429.67   10.36
   5   0 -10  447.26   10.71
   5   0 -10  437.33   10.65
  -5   0   9  197.95    7.23
   5   0  -9  205.49    7.80
   5   0  -9  177.36    6.39
   5   0  -9  174.05    6.26
  -5   0   9  166.54    5.94
   5   0  -9  195.99    7.63
  -5   0   8   16.26    2.36
   5   0  -8   18.67    2.68
   5   0  -8   16.79    2.33
  -5   0   8   14.29    2.10
   5   0  -8   15.57    2.12
  -5   0   8   13.39    2.00
   5   0  -8   18.86    2.71
  -5   0   7  285.24    9.53
   5   0  -7  279.60   10.34
   5   0  -7  283.96    9.50
   5   0  -7  256.26    9.14
   5   0  -7  250.93    8.43
   5   0  -7  252.84    8.06
   5   0  -7  283.73   10.43
  -5   0   6  320.52   10.21
   5   0  -6  345.44   11.36
   5   0  -6  322.89   10.39
   5   0  -6  308.72   10.26
   5   0  -6  288.29    9.21
   5   0  -6  302.91    9.56
   5   0  -6  337.22   11.26
  -5   0   5 1559.28   29.40
  -5   0   5 1565.08   30.22
   5   0  -5 1437.81   29.56
   5   0  -5 1453.96   29.64
   5   0  -5 1364.20   27.57
   5   0  -5 1459.00   29.10
   5   0  -4   19.43    2.59
  -5   0   4   22.86    2.55
  -5   0   4   18.77    2.25
   5   0  -4   18.71    2.42
   5   0  -4   17.27    2.35
   5   0  -4   17.95    1.97
   5   0  -4   18.19    2.40
   5   0  -4   18.74    1.91
   5   0  -4   17.90    2.31
   5   0  -4   19.38    2.51
  -5   0   3  116.19    5.58
   5   0  -3  114.78    5.37
   5   0  -3  107.60    5.22
   5   0  -3  110.91    4.89
   5   0  -3  117.03    5.46
   5   0  -3  120.94    5.59
   5   0  -3  115.87    5.43
   5   0  -2  565.84   13.64
   5   0  -2  592.14   14.02
   5   0  -2  550.96   13.17
   5   0  -2  565.92   13.94
   5   0  -2  566.82   13.64
   5   0  -1 1845.35   34.86
   5   0  -1 2020.67   35.55
   5   0  -1 1952.92   35.81
   5   0  -1 2011.36   36.31
   5   0  -1 2049.58   36.28
   5   0  -1 1873.62   34.93
  -5   0   1 2070.52   38.20
   5   0   0  307.56    8.72
   5   0   0  270.47    7.67
   5   0   0  275.26    7.54
   5   0   0  271.78    7.98
   5   0   0  289.44    8.70
   5   0   0  288.48    8.54
   5   0   0  297.93    8.73
   5   0   0  267.55    7.48
   5   0   1  220.54    7.01
   5   0   1  206.83    6.72
   5   0   1  205.63    6.61
   5   0   1  198.92    6.07
   5   0   1  212.63    7.00
   5   0   2   11.54    1.69
   5   0   2    8.31    1.57
   5   0   2    8.49    1.58
   5   0   2    7.59    1.56
   5   0   2    8.15    1.18
   5   0   2    8.87    1.50
   5   0   2    7.93    1.36
   5   0   3  575.94   13.61
   5   0   3  573.53   13.36
   5   0   3  532.36   13.75
   5   0   3  550.73   13.59
   5   0   3  572.88   14.09
   5   0   3  511.08   13.36
   5   0   4  280.79    8.74
   5   0   4  281.86    8.44
   5   0   4  271.18    9.11
   5   0   4  290.78    9.09
   5   0   4  293.11    9.13
   5   0   5 1942.83   35.14
   5   0   5 2013.94   36.84
   5   0   5 2008.67   36.19
   5   0   5 1937.87   37.11
   5   0   5 1885.02   36.25
   5   0   6 1319.81   26.40
   5   0   6 1253.79   24.94
   5   0   6 1262.76   27.02
   5   0   7   67.01    3.91
   5   0   7   62.17    3.63
   5   0   8    7.91    1.35
   5   0   8    8.69    1.32
  -5   0  -8    8.47    1.51
  -5  -1  10   15.83    1.87
   5   1 -10   16.69    1.79
   5   1 -10   14.51    1.46
   5   1 -10   15.96    1.79
   5   1  -9    0.58    1.12
  -5  -1   9    1.12    0.77
   5   1  -9    0.76    1.13
  -5  -1   9    4.84    1.51
   5   1  -9    1.33    1.00
   5   1  -9    0.54    1.06
  -5  -1   8  223.30    8.22
   5   1  -8  230.60    8.87
   5   1  -8  202.58    7.73
  -5  -1   8  169.24    7.09
   5   1  -8  192.98    6.67
  -5  -1   8  184.13    6.72
   5   1  -8  233.25    8.92
  -5  -1   7  273.25    9.62
   5   1  -7  277.26    9.43
  -5  -1   7  240.15    8.70
   5   1  -7  290.37   10.41
   5   1  -7  253.76    9.08
   5   1  -7  238.28    7.71
   5   1  -7  243.17    7.93
   5   1  -7  292.98   10.48
  -5  -1   6   72.47    4.83
  -5  -1   6   70.93    4.47
   5   1  -6   73.41    4.71
   5   1  -6   81.21    5.34
   5   1  -6   68.64    4.59
   5   1  -6   65.75    3.60
   5   1  -6   72.15    4.30
   5   1  -6   78.25    5.26
  -5  -1   5  508.38   13.74
  -5  -1   5  520.09   13.61
   5   1  -5  511.69   13.65
   5   1  -5  510.57   13.86
   5   1  -5  519.22   13.43
   5   1  -5  515.27   14.54
   5   1  -4   93.62    5.29
  -5  -1   4  103.38    5.27
   5   1  -4   91.15    4.19
   5   1  -4   99.99    5.29
   5   1  -4   99.24    5.13
   5   1  -3   92.26    4.92
   5   1  -3   92.95    4.84
   5   1  -3   98.09    5.02
   5   1  -3   91.26    4.84
   5   1  -3  102.83    5.11
   5   1  -2  421.78   11.64
   5   1  -2  429.32   11.39
   5   1  -2  449.38   11.56
   5   1  -2  399.82   10.92
   5   1  -2  438.42   11.87
   5   1  -2  433.56   11.68
   5   1  -2  428.09   11.39
  -5  -1   1  159.95    5.68
   5   1  -1  181.35    6.57
   5   1  -1  155.55    5.87
   5   1  -1  158.88    5.90
   5   1  -1  165.38    6.13
   5   1  -1  153.97    6.00
   5   1  -1  152.96    6.24
   5   1  -1  163.22    6.37
   5   1  -1  154.17    5.88
   5   1   0  772.39   16.53
   5   1   0  750.27   16.21
   5   1   0  827.50   17.41
   5   1   0  845.11   17.83
   5   1   0  818.15   17.55
   5   1   0  848.88   17.95
   5   1   0  765.17   16.55
   5   1   1 1159.67   22.84
   5   1   1 1047.09   22.01
   5   1   1 1157.84   22.61
   5   1   1 1207.16   23.25
   5   1   1 1016.63   21.28
  -5  -1  -1 1034.38   21.34
   5   1   1 1161.55   22.67
   5   1   2   16.67    2.17
   5   1   2   11.17    1.75
   5   1   2   14.20    2.05
   5   1   2   12.62    1.92
   5   1   2   14.26    1.84
   5   1   3  543.25   13.31
   5   1   3  511.14   13.52
   5   1   3  545.16   13.37
   5   1   3  540.15   13.99
  -5  -1  -3  495.54   12.01
   5   1   4 1790.33   33.22
   5   1   4 1863.70   33.44
   5   1   4 1836.47   34.25
   5   1   5  298.09    9.12
   5   1   5  295.97    9.58
   5   1   5  321.11    9.49
   5   1   5  300.33    9.50
  -5  -1  -5  283.95    8.57
   5   1   5  262.92    9.36
   5   1   6   11.29    1.65
   5   1   6   14.55    2.14
   5   1   6   11.24    1.85
  -5  -1  -6   10.11    1.60
   5   1   6    7.75    1.53
   5   1   7  186.75    6.63
   5   1   7  185.44    6.32
  -5  -1  -7  187.33    6.88
   5   1   8    2.59    0.84
  -5  -1  -8    0.68    0.90
  -5  -2  10  307.09    8.50
  -5  -2   9  573.04   14.08
   5   2  -9  566.03   13.96
   5   2  -9  551.49   13.14
   5   2  -9  558.39   13.97
   5   2  -8    6.40    1.84
  -5  -2   8    3.97    1.05
   5   2  -8    5.89    1.76
  -5  -2   8    5.39    1.73
   5   2  -8    6.02    1.26
   5   2  -8    7.44    1.87
  -5  -2   7   48.76    3.94
   5   2  -7   47.35    3.82
   5   2  -7   56.35    4.42
  -5  -2   7   40.67    3.24
   5   2  -7   42.03    3.56
   5   2  -7   39.95    2.67
   5   2  -7   43.93    3.13
   5   2  -7   51.12    4.24
  -5  -2   6  150.52    6.83
  -5  -2   6  118.36    5.81
   5   2  -6  142.78    6.63
   5   2  -6  155.01    7.40
   5   2  -6  133.94    6.53
   5   2  -6  134.49    6.10
   5   2  -6  160.32    7.53
  -5  -2   5  365.93   11.06
  -5  -2   5  317.84   10.37
   5   2  -5  364.14   11.65
   5   2  -5  331.80   10.97
   5   2  -5  348.42   10.67
   5   2  -5  371.52   11.75
   5   2  -4  155.41    6.79
  -5  -2   4  152.76    6.58
   5   2  -4  157.47    6.78
   5   2  -4  165.58    7.09
   5   2  -4  161.39    6.81
   5   2  -3 1099.14   23.37
  -5  -2   3 1159.46   24.24
   5   2  -3 1087.35   23.13
   5   2  -3 1158.31   23.81
   5   2  -3 1030.50   21.62
   5   2  -3 1073.72   23.46
   5   2  -3 1154.49   23.86
  -5  -2   2  273.39    9.67
  -5  -2   2  250.10    7.44
   5   2  -2  252.53    8.81
   5   2  -2  267.14    8.48
   5   2  -2  258.96    8.58
   5   2  -2  248.89    7.97
   5   2  -2  263.21    8.90
   5   2  -2  247.72    8.66
   5   2  -2  263.15    8.66
  -5  -2   1   39.60    2.93
   5   2  -1   35.61    3.00
   5   2  -1   41.89    3.13
   5   2  -1   37.14    2.84
   5   2  -1   41.56    3.13
   5   2  -1   40.52    3.18
   5   2  -1   41.95    3.14
  -5  -2   0  139.37    5.88
   5   2   0  132.23    5.75
   5   2   0  126.60    5.34
   5   2   0  124.58    5.48
   5   2   0  129.13    5.72
   5   2   0  127.35    5.45
  -5  -2   0  131.72    4.77
   5   2   0  136.80    5.96
   5   2   0  129.08    5.42
   5   2   1    6.72    1.65
   5   2   1    9.78    1.51
   5   2   1    8.23    1.65
   5   2   1    9.86    1.95
   5   2   1    8.99    1.41
  -5  -2  -1    8.91    1.38
  -5  -2  -1    8.54    1.59
   5   2   1    9.72    1.76
   5   2   1    9.47    1.48
   5   2   2   20.14    2.48
   5   2   2   19.75    2.32
   5   2   2   20.84    2.62
  -5  -2  -2   17.04    2.00
  -5  -2  -2   17.60    2.30
   5   2   2   18.51    2.17
   5   2   3  721.19   16.64
   5   2   3  704.43   15.99
  -5  -2  -3  639.88   15.13
  -5  -2  -3  675.93   16.23
   5   2   3  605.11   14.34
   5   2   4  332.35   10.30
   5   2   4  328.16   10.25
   5   2   4  332.34    9.86
   5   2   4  344.50   11.00
  -5  -2  -4  302.98    9.34
  -5  -2  -4  311.46   10.20
   5   2   5  683.67   15.90
   5   2   5  646.74   15.79
   5   2   5  631.64   15.16
   5   2   5  619.44   15.92
  -5  -2  -5  607.99   14.73
  -5  -2  -5  679.53   16.36
   5   2   6  191.72    6.58
   5   2   6  167.15    6.64
   5   2   6  183.19    6.34
   5   2   6  158.04    6.21
  -5  -2  -6  169.18    6.19
  -5  -2  -6  176.74    6.96
   5   2   7   90.20    3.79
  -5  -2  -7   79.47    3.50
  -5  -2  -7   82.53    4.13
   5   3  -9  100.13    4.54
   5   3  -9  101.73    4.66
   5   3  -9  101.84    4.68
   5   3  -8   37.94    3.22
   5   3  -8   42.46    3.52
   5   3  -8   43.13    3.57
   5   3  -7   80.92    4.84
   5   3  -7   81.35    5.20
   5   3  -7   70.81    4.56
   5   3  -7   81.88    5.20
  -5  -3   6  338.17   10.80
   5   3  -6  351.99   11.01
   5   3  -6  390.66   12.18
   5   3  -6  323.40   10.99
  -5  -3   6  291.99    9.15
   5   3  -6  338.71   10.25
   5   3  -6  401.17   12.32
   5   3  -5    9.74    2.23
  -5  -3   5    6.72    1.47
   5   3  -5    7.23    1.83
  -5  -3   5    6.83    1.52
   5   3  -5    7.83    2.09
  -5  -3   5    8.02    1.84
   5   3  -5   15.09    2.27
  -5  -3   4  967.32   19.87
   5   3  -4 1036.04   21.94
  -5  -3   4  978.22   21.28
  -5  -3   4 1086.55   21.88
   5   3  -4 1005.96   22.09
  -5  -3   4  890.18   19.93
   5   3  -4  985.08   21.88
  -5  -3   3  430.89   11.18
   5   3  -3  465.52   12.53
  -5  -3   3  494.10   12.92
  -5  -3   3  496.82   12.62
   5   3  -3  432.58   12.20
   5   3  -3  452.77   12.95
   5   3  -3  427.22   11.08
   5   3  -3  435.14   12.73
  -5  -3   3  414.15   11.08
   5   3  -3  448.97   12.64
   5   3  -3  455.55   13.09
  -5  -3   2   36.42    3.41
  -5  -3   2   34.57    2.69
   5   3  -2   37.04    3.21
   5   3  -2   31.17    2.83
   5   3  -2   28.14    2.93
  -5  -3   2   33.04    2.58
   5   3  -2   37.69    3.32
   5   3  -2   30.45    3.04
  -5  -3   1  127.08    5.60
   5   3  -1  130.62    5.89
   5   3  -1  130.67    5.94
   5   3  -1  125.13    5.21
   5   3  -1  119.15    5.68
   5   3  -1  125.65    5.83
  -5  -3   1  117.27    4.97
   5   3  -1  133.40    6.02
  -5  -3   1  131.46    6.67
   5   3   0    1.76    1.33
  -5  -3   0    1.53    1.26
   5   3   0    2.40    1.17
   5   3   0    0.59    1.04
   5   3   0    0.67    1.14
   5   3   0    1.16    1.22
  -5  -3   0    0.66    0.97
  -5  -3   0    3.10    1.14
   5   3   0    0.97    1.16
   5   3   1  112.46    5.68
  -5  -3  -1  105.64    5.60
   5   3   1   98.73    4.90
   5   3   1  106.43    5.06
   5   3   1   99.15    5.68
  -5  -3  -1  100.80    4.75
  -5  -3  -1  105.70    5.03
   5   3   1  101.34    5.41
   5   3   1   98.02    4.93
   5   3   2  467.51   12.74
  -5  -3  -2  448.32   13.10
   5   3   2  451.99   11.40
   5   3   2  454.91   13.22
  -5  -3  -2  424.50   11.63
  -5  -3  -2  423.45   11.85
   5   3   2  430.41   11.91
   5   3   2  450.64   11.44
  -5  -3  -3   13.49    2.64
  -5  -3  -3   19.06    2.21
  -5  -3  -3   16.14    2.39
   5   3   3   13.09    1.86
   5   3   4 1020.94   23.44
  -5  -3  -4 1074.44   21.89
  -5  -3  -4 1062.62   22.72
   5   3   5  123.20    5.65
  -5  -3  -5  105.68    5.69
   5   3   5  112.46    4.89
   5   3   5  109.39    5.58
  -5  -3  -5  111.16    5.04
  -5  -3  -5  115.89    5.57
   5   3   6  154.55    5.80
   5   3   6  152.40    5.13
  -5  -3  -6  150.30    5.35
  -5  -3  -6  141.58    5.71
  -5  -3  -7   37.60    2.11
  -5  -3  -7   38.97    2.53
   5   4  -9    0.38    0.71
   5   4  -9    0.54    0.72
  -5  -4   9   -0.06    0.79
   5   4  -9    0.18    0.84
  -5  -4   8   39.66    2.97
   5   4  -8   45.86    3.37
  -5  -4   8   35.15    2.39
   5   4  -8   45.59    3.37
  -5  -4   7   59.67    3.88
   5   4  -7   69.14    4.37
   5   4  -7   72.52    4.69
  -5  -4   7   55.56    3.40
   5   4  -7   71.18    4.64
  -5  -4   6   19.87    2.40
   5   4  -6   22.45    2.94
  -5  -4   6   18.32    2.20
   5   4  -6   20.98    2.40
   5   4  -6   20.29    2.78
   5   4  -5   13.32    2.44
  -5  -4   5   12.98    1.80
   5   4  -5   12.92    2.03
  -5  -4   5   11.38    2.00
   5   4  -5   21.35    2.78
   5   4  -5   13.51    2.44
   5   4  -5   10.83    2.14
   5   4  -5   13.06    2.16
  -5  -4   4  110.52    5.11
  -5  -4   4  115.78    5.47
   5   4  -4  111.89    5.77
   5   4  -4  125.89    6.47
  -5  -4   4  104.69    5.12
   5   4  -4  108.99    5.76
   5   4  -4  122.02    6.38
  -5  -4   3  276.17    8.55
   5   4  -3  287.43    9.23
  -5  -4   3  261.87    8.62
   5   4  -3  264.04    9.00
   5   4  -3  261.02    9.46
  -5  -4   3  260.63    8.47
   5   4  -3  281.95    9.70
  -5  -4   2   31.82    2.83
   5   4  -2   31.78    3.14
  -5  -4   2   30.62    3.03
  -5  -4   2   33.31    2.94
   5   4  -2   29.77    2.76
   5   4  -2   31.52    3.26
   5   4  -2   29.08    2.69
   5   4  -2   27.14    2.95
  -5  -4   2   29.62    2.69
   5   4  -2   33.56    3.35
   5   4  -2   32.69    3.31
   5   4  -1    4.86    1.68
  -5  -4   1    1.45    1.28
   5   4  -1    3.55    1.59
   5   4  -1    2.26    1.31
   5   4  -1    3.48    1.22
   5   4  -1    4.63    1.64
  -5  -4   1    3.04    1.23
   5   4   0   51.01    3.82
  -5  -4   0   53.97    3.78
   5   4   0   46.50    3.69
   5   4   0   46.14    3.77
   5   4   0   44.31    3.24
  -5  -4   0   52.84    3.54
  -5  -4   0   48.16    3.27
   5   4   0   51.44    4.02
   5   4   0   49.88    3.83
   5   4   1    8.04    1.58
   5   4   1   10.56    2.12
  -5  -4  -1   10.16    2.05
   5   4   1    8.78    1.79
   5   4   1    8.36    1.83
   5   4   1    9.07    2.04
  -5  -4  -1    9.03    1.73
   5   4   1    7.35    1.87
  -5  -4  -1    9.89    1.72
   5   4   1    9.64    1.83
   5   4   2 1206.98   25.77
  -5  -4  -2 1193.91   25.27
   5   4   2 1179.21   24.26
   5   4   2 1219.69   26.10
  -5  -4  -2 1250.88   24.29
  -5  -4  -2 1242.76   24.60
   5   4   2 1178.23   24.33
   5   4   3   18.04    2.47
  -5  -4  -3   15.54    2.43
   5   4   3   10.96    1.88
   5   4   3   11.35    1.82
   5   4   3   15.06    2.58
  -5  -4  -3   16.26    2.07
  -5  -4  -3   13.06    2.11
   5   4   3   11.37    1.69
  -5  -4  -4   66.57    4.37
  -5  -4  -4   69.23    3.93
  -5  -4  -4   74.30    4.34
   5   4   5   20.51    2.28
   5   4   5   16.19    2.22
  -5  -4  -5   19.37    2.00
  -5  -4  -5   18.27    2.19
   5   4   6    3.82    1.08
  -5  -4  -6    4.56    1.14
   5   4   6    3.48    1.04
  -5  -4  -6    2.86    1.05
  -5  -4  -6    3.74    0.92
  -5  -5   8  135.10    4.74
   5   5  -8  167.83    5.63
  -5  -5   8  121.76    4.29
   5   5  -8  166.24    5.63
   5   5  -7    0.59    1.12
  -5  -5   7    0.39    0.84
   5   5  -7    0.63    1.08
  -5  -5   7    0.94    0.91
   5   5  -6   12.86    2.16
  -5  -5   6    9.11    1.59
   5   5  -6   13.88    2.24
  -5  -5   6    9.55    1.69
   5   5  -6   11.39    1.75
   5   5  -6   11.61    2.06
  -5  -5   5   34.51    2.83
  -5  -5   5   29.90    2.63
   5   5  -5   35.60    3.28
   5   5  -5   36.17    3.54
   5   5  -5   34.10    3.09
   5   5  -5   37.30    3.60
  -5  -5   4  153.58    6.36
  -5  -5   4  148.16    5.91
   5   5  -4  154.80    6.55
   5   5  -4  169.80    7.56
   5   5  -4  147.94    6.89
  -5  -5   4  163.69    6.42
   5   5  -4  160.16    6.90
   5   5  -4  167.38    7.58
  -5  -5   3 1164.95   23.42
   5   5  -3 1158.29   23.74
  -5  -5   3 1030.47   22.06
   5   5  -3 1064.84   23.05
   5   5  -3 1053.00   24.06
  -5  -5   3 1229.91   23.60
   5   5  -3 1185.83   24.80
  -5  -5   2  761.04   17.40
   5   5  -2  759.85   17.61
  -5  -5   2  667.63   15.88
   5   5  -2  690.37   16.15
   5   5  -2  815.47   19.06
   5   5  -2  714.43   16.09
   5   5  -2  687.66   17.51
  -5  -5   2  810.70   17.36
   5   5  -2  812.17   18.90
   5   5  -2  802.04   19.04
  -5  -5   1   31.28    2.90
   5   5  -1   30.14    3.16
  -5  -5   1   30.59    2.51
   5   5  -1   31.45    3.26
   5   5  -1   28.59    2.72
  -5  -5   1   29.50    2.54
  -5  -5   1   30.83    2.78
   5   5  -1   31.96    3.32
   5   5   0  205.83    8.32
  -5  -5   0  226.42    8.04
   5   5   0  212.30    8.28
  -5  -5   0  213.71    7.30
  -5  -5   0  230.97    7.74
   5   5   0  206.54    8.29
   5   5   0  217.23    8.41
   5   5   1   26.88    2.98
  -5  -5  -1   27.50    2.87
   5   5   1   28.29    2.85
   5   5   1   26.52    2.87
  -5  -5  -1   29.34    2.72
  -5  -5  -1   26.57    2.64
   5   5   1   27.07    2.93
   5   5   1   28.34    2.88
  -5  -5  -2   11.53    2.03
   5   5   2    9.86    1.98
   5   5   2    8.45    1.64
   5   5   2    9.70    2.05
  -5  -5  -2   11.36    1.80
  -5  -5  -2    9.23    1.79
   5   5   2    7.64    1.70
   5   5   2    9.29    1.71
   5   5   3   27.89    2.78
  -5  -5  -3   28.54    2.71
   5   5   3   25.66    2.84
  -5  -5  -3   27.87    2.52
  -5  -5  -3   28.06    2.60
   5   5   4  228.29    7.60
   5   5   4  212.63    7.56
  -5  -5  -4  213.54    6.77
  -5  -5  -4  209.92    6.93
  -5  -5  -5  109.20    4.30
   5   5   5  104.91    4.51
  -5  -5  -5  110.80    4.10
  -5  -5  -5  103.87    4.25
  -5  -6   7    3.96    0.93
   5   6  -7    7.30    1.35
   5   6  -7    3.69    1.15
   5   6  -7    7.78    1.35
   5   6  -6  169.08    6.12
   5   6  -6  187.71    6.83
  -5  -6   6  155.71    5.66
   5   6  -6  160.05    5.37
   5   6  -6  186.20    6.83
  -5  -6   5  702.70   15.66
   5   6  -5  705.95   16.02
   5   6  -5  775.09   17.60
  -5  -6   5  680.40   15.66
   5   6  -5  690.68   15.93
   5   6  -5  792.50   17.69
  -5  -6   4  112.63    5.18
   5   6  -4  109.43    5.02
   5   6  -4  128.60    6.16
  -5  -6   4  114.76    5.14
   5   6  -4  122.06    5.62
   5   6  -4  124.57    6.07
  -5  -6   3   72.78    4.27
   5   6  -3   72.42    3.82
   5   6  -3   78.89    4.88
  -5  -6   3   81.09    4.30
   5   6  -3   75.23    4.61
   5   6  -3   75.58    4.85
  -5  -6   2  238.52    8.28
   5   6  -2  241.59    7.74
  -5  -6   2  249.79    8.15
   5   6  -2  249.56    8.88
  -5  -6   1    3.31    1.24
   5   6  -1    2.82    1.17
  -5  -6   1    1.95    1.29
   5   6  -1    2.57    1.40
   5   6  -1    2.22    1.06
  -5  -6   1    3.34    1.18
   5   6  -1    2.39    1.44
   5   6   0  165.58    6.32
  -5  -6   0  159.94    6.31
   5   6   0  156.52    6.69
   5   6   0  143.68    5.87
  -5  -6   0  147.07    5.73
  -5  -6   0  158.52    6.15
   5   6   0  146.38    6.53
   5   6   0  161.35    6.79
   5   6   1   36.10    3.07
  -5  -6  -1   36.25    2.91
   5   6   1   33.68    2.90
   5   6   1   33.21    2.93
  -5  -6  -1   36.03    2.78
  -5  -6  -1   36.64    2.80
   5   6   1   33.88    2.94
   5   6   1   35.05    2.98
   5   6   2   49.00    3.31
  -5  -6  -2   48.43    3.20
   5   6   2   47.06    3.02
   5   6   2   43.91    3.27
  -5  -6  -2   52.48    3.17
  -5  -6  -2   48.43    3.14
   5   6   2   41.25    2.87
   5   6   2   44.86    2.97
   5   6   3   24.24    2.26
   5   6   3   21.50    2.29
  -5  -6  -3   25.04    2.08
  -5  -6  -3   24.52    2.15
  -5  -6  -4   12.36    1.42
   5   6   4   12.79    1.61
  -5  -6  -4   13.11    1.38
  -5  -6  -4   12.15    1.46
   5   7  -5    0.27    0.88
  -5  -7   5   -0.08    0.78
  -5  -7   5    0.44    0.73
   5   7  -5    0.92    0.91
   5   7  -5    0.05    0.68
   5   7  -5    0.42    0.74
  -5  -7   4    1.90    1.01
   5   7  -4    1.80    1.17
   5   7  -4    3.05    1.11
   5   7  -4    2.18    0.83
   5   7  -4    1.98    1.15
  -5  -7   3   -0.13    0.80
  -5  -7   3    0.21    0.94
   5   7  -3    0.17    1.07
   5   7  -3    0.53    1.04
   5   7  -3    0.04    1.06
  -5  -7   2    0.85    0.89
  -5  -7   2    1.18    1.02
   5   7  -2    0.79    1.06
  -5  -7   1   89.45    4.28
   5   7  -1   87.34    4.53
  -5  -7   1   86.41    4.12
   5   7  -1   86.71    4.52
  -5  -7   0  379.12    9.89
   5   7   0  372.31    9.10
   5   7   0  379.39   10.11
  -5  -7   0  384.63    9.30
  -5  -7   0  380.58    9.55
   5   7   0  371.27    9.97
   5   7   0  377.47   10.12
   5   7   1  180.35    5.64
  -5  -7  -1  181.68    5.88
   5   7   1  178.18    5.84
  -5  -7  -1  184.91    5.63
  -5  -7  -1  184.17    5.69
   5   7   1  165.21    5.64
   5   7   1  177.72    5.86
   5   7   2    6.95    1.10
   5   7   2    5.64    1.05
  -5  -7  -2    5.88    1.05
  -5  -7  -2    6.17    1.09
  -6   8   3    0.82    0.65
   6  -8  -3    1.16    0.62
  -6   8   2  199.72    5.80
   6  -8  -2  214.26    6.40
   6  -8  -1    6.14    1.09
   6  -8  -1    4.54    1.12
   6  -8   0   25.35    2.10
   6  -8   1  142.95    4.92
   6  -8   2   34.51    2.01
   6  -8   2   32.93    2.16
  -6   7   5   42.52    2.59
   6  -7  -4  286.42    7.59
   6  -7  -4  279.96    8.24
  -6   7   3  464.66   11.22
   6  -7  -3  437.23   10.64
   6  -7  -3  429.34   11.30
  -6   7   2  600.23   13.66
   6  -7  -2  621.84   13.71
  -6   7   1  150.10    5.60
   6  -7  -1  156.97    6.19
  -6   7   0   22.43    1.98
   6  -7   0   26.81    2.55
   6  -7   1    3.31    1.23
   6  -7   1    4.04    1.18
   6  -7   2    2.02    1.03
   6  -7   2    2.35    0.96
   6  -7   3  167.10    5.50
  -6   6   6   61.64    3.20
   6  -6  -6   64.87    2.89
   6  -6  -6   69.62    3.57
  -6   6   6   57.72    2.91
   6  -6  -5  104.62    4.60
   6  -6  -5  110.52    4.48
   6  -6  -5  110.89    5.01
   6  -6  -5  117.32    5.14
  -6   6   5   96.93    4.07
   6  -6  -5  101.86    4.53
   6  -6  -4  112.72    4.84
   6  -6  -4  128.00    5.29
   6  -6  -4  121.38    5.60
   6  -6  -4  130.07    5.72
   6  -6  -4  112.44    4.80
   6  -6  -3  250.98    8.15
   6  -6  -3  241.10    8.53
   6  -6  -3  263.38    8.84
   6  -6  -2    4.37    1.64
   6  -6  -2    4.22    1.48
   6  -6  -1  120.06    5.71
   6  -6  -1  113.31    5.61
   6  -6   0  345.57    9.83
   6  -6   0  349.30    9.83
   6  -6   1  812.58   16.94
   6  -6   1  706.68   16.99
   6  -6   2  146.72    5.38
   6  -6   2  120.88    5.35
   6  -6   3   21.44    1.87
   6  -6   3   18.19    2.04
   6  -6   4   26.00    2.07
   6  -5  -7   76.55    4.12
  -6   5   7   76.17    3.43
   6  -5  -7   85.24    4.01
   6  -5  -7   78.00    4.13
   6  -5  -6  627.45   15.27
   6  -5  -6  655.35   14.30
   6  -5  -6  632.66   14.87
   6  -5  -6  653.65   14.65
  -6   5   6  627.71   14.28
   6  -5  -6  622.34   15.25
   6  -5  -5   68.52    4.44
   6  -5  -5   82.64    4.48
   6  -5  -5   79.94    4.58
   6  -5  -5   85.21    4.69
  -6   5   5   83.02    4.27
   6  -5  -4    3.91    1.34
  -6   5   4    5.39    1.38
   6  -5  -4    4.55    1.43
   6  -5  -4    5.78    1.55
   6  -5  -4    3.62    1.56
   6  -5  -4    3.85    1.59
   6  -5  -4    4.37    1.58
   6  -5  -3   26.20    2.51
   6  -5  -3   35.41    3.21
   6  -5  -3   35.54    3.29
   6  -5  -3   32.93    3.16
   6  -5  -3   33.15    3.24
  -6   5   3   25.20    2.33
   6  -5  -3   28.78    2.59
   6  -5  -2 1431.66   28.18
   6  -5  -2 1381.21   28.30
   6  -5  -1   18.25    2.49
   6  -5  -1   19.05    2.46
   6  -5   0  266.67    8.61
   6  -5   0  235.91    8.81
   6  -5   0  241.16    8.43
   6  -5   0  241.27    8.54
   6  -5   1  720.77   16.61
   6  -5   1  699.67   16.05
  -6   5  -2  132.01    7.57
   6  -5   2  119.66    5.10
   6  -5   2  134.96    5.32
   6  -5   2  112.67    5.18
   6  -5   3    3.63    1.18
   6  -5   3    4.84    1.13
   6  -5   4  343.31    8.71
   6  -5   5  162.61    5.01
   6  -5   5  154.92    4.96
  -6   4   8    3.69    1.07
   6  -4  -8    3.24    1.08
   6  -4  -7  123.11    5.74
  -6   4   7  105.31    4.41
   6  -4  -7  119.90    4.89
   6  -4  -7  118.52    5.21
   6  -4  -7  105.02    4.67
  -6   4   7  129.31    5.38
   6  -4  -7  122.45    5.73
   6  -4  -6   43.90    3.67
   6  -4  -6   45.53    3.45
   6  -4  -6   41.21    3.32
   6  -4  -6   44.61    3.32
  -6   4   6   45.91    3.42
   6  -4  -6   44.32    3.68
   6  -4  -5  427.02   12.47
   6  -4  -5  446.67   12.36
   6  -4  -5  388.60   11.74
   6  -4  -5  424.35   12.08
   6  -4  -5  413.91   11.94
  -6   4   5  416.64   11.87
   6  -4  -5  433.72   12.56
   6  -4  -4  381.97   11.46
   6  -4  -4  375.39   11.66
   6  -4  -4  385.90   11.52
   6  -4  -4  395.08   11.82
  -6   4   4  377.06   11.06
   6  -4  -4  370.50   11.33
   6  -4  -3  308.16    9.71
   6  -4  -3  333.04   10.87
   6  -4  -3  331.75   10.36
   6  -4  -3  339.09   10.66
   6  -4  -3  302.54    9.67
   6  -4  -2 1145.88   24.40
   6  -4  -2 1072.17   23.46
   6  -4  -1  281.29    9.35
   6  -4  -1  250.22    8.66
   6  -4  -1  275.37    9.07
   6  -4   0  667.20   15.75
   6  -4   0  660.63   16.60
   6  -4   0  670.88   15.53
   6  -4   1  128.68    5.57
   6  -4   1  130.20    5.95
   6  -4   1  117.80    5.20
   6  -4   1  122.26    5.35
   6  -4   2 1288.56   22.65
   6  -4   2 1307.01   24.43
   6  -4   2 1234.06   23.67
   6  -4   2 1249.81   24.47
   6  -4   3   14.11    1.65
   6  -4   3   14.24    1.57
   6  -4   3   14.36    1.75
   6  -4   3   13.29    1.51
   6  -4   4  447.73   10.92
   6  -4   4  487.95   10.47
   6  -4   5   20.53    2.01
   6  -4   5   21.45    1.71
   6  -4   5   17.79    1.89
   6  -4   6   16.43    1.65
   6  -4   6   13.95    1.57
   6  -3  -9    5.07    1.15
   6  -3  -9    5.63    1.25
   6  -3  -9    4.29    0.98
   6  -3  -8  162.29    5.60
   6  -3  -8  170.73    6.07
  -6   3   7    0.23    1.08
  -6   3   7    0.64    0.85
   6  -3  -7    0.97    1.07
   6  -3  -7    0.14    0.90
   6  -3  -7    1.23    1.20
   6  -3  -6 2726.98   49.18
   6  -3  -6 2825.10   48.23
   6  -3  -6 2357.68   46.84
   6  -3  -6 2520.58   46.94
   6  -3  -6 2542.15   46.90
  -6   3   6 2754.45   47.87
   6  -3  -6 2737.70   49.20
  -6   3   5   21.60    2.43
   6  -3  -5   27.60    3.10
   6  -3  -5   21.46    2.79
   6  -3  -5   18.77    2.49
   6  -3  -5   20.73    2.54
   6  -3  -5   20.22    2.52
   6  -3  -5   28.31    3.13
  -6   3   4  245.04    8.32
   6  -3  -4  219.57    8.56
   6  -3  -4  238.73    8.96
   6  -3  -4  245.90    8.47
   6  -3  -4  229.82    8.63
   6  -3  -4  217.86    8.55
  -6   3   3 1008.07   21.59
   6  -3  -3  945.58   21.28
   6  -3  -3 1022.64   22.67
   6  -3  -3 1037.90   22.74
   6  -3  -3 1003.30   21.44
   6  -3  -3 1038.24   22.30
   6  -3  -3  938.68   21.32
  -6   3   2 1296.48   25.08
  -6   3   2 1327.36   26.12
   6  -3  -2 1247.53   25.23
   6  -3  -2 1307.37   25.94
   6  -3  -2 1240.29   25.22
  -6   3   1 1278.66   26.48
   6  -3  -1 1405.30   28.04
   6  -3  -1 1378.23   28.21
   6  -3  -1 1260.46   25.97
   6  -3  -1 1503.60   27.95
  -6   3   0   49.54    3.48
   6  -3   0   52.78    3.72
   6  -3   0   63.63    4.00
   6  -3   0   69.27    4.30
   6  -3   0   59.17    4.05
   6  -3   0   52.71    3.20
   6  -3   0   57.04    3.75
   6  -3   1    5.70    1.37
   6  -3   1    3.65    1.23
   6  -3   1    4.51    1.48
   6  -3   1    4.27    1.37
   6  -3   1    6.49    1.45
   6  -3   1    3.13    1.25
   6  -3   2    5.52    1.20
   6  -3   2    5.32    1.37
   6  -3   2    6.81    1.57
   6  -3   2    5.01    1.28
   6  -3   2    5.83    1.23
   6  -3   2    5.56    1.32
   6  -3   3   91.05    4.34
   6  -3   3  101.63    4.55
   6  -3   3   88.46    4.34
   6  -3   3   85.23    4.09
   6  -3   4    0.39    0.98
   6  -3   4    0.28    0.90
   6  -3   4    0.93    0.85
   6  -3   4    0.80    1.07
   6  -3   5    3.20    1.21
   6  -3   5    4.77    1.20
   6  -3   5    2.90    1.20
   6  -3   6   71.69    3.67
   6  -3   6   66.95    3.45
   6  -3   7  103.17    3.90
   6  -3   7  110.76    3.66
   6  -2  -9   85.95    4.26
   6  -2  -9   76.30    3.41
   6  -2  -9   88.30    4.31
   6  -2  -8    0.45    1.17
   6  -2  -8    1.25    1.24
   6  -2  -8    1.17    1.00
   6  -2  -8    1.47    1.11
  -6   2   7   67.87    3.75
   6  -2  -7   78.26    4.57
   6  -2  -7   72.42    4.10
   6  -2  -7   67.34    3.84
  -6   2   7   77.13    4.62
  -6   2   6  223.95    7.64
  -6   2   6  243.05    8.65
   6  -2  -6  264.45    9.77
   6  -2  -6  251.73    9.04
   6  -2  -6  215.64    8.32
   6  -2  -6  223.91    7.99
   6  -2  -6  239.37    8.56
   6  -2  -6  259.74    9.72
  -6   2   5 1084.18   22.44
  -6   2   5 1147.26   23.92
   6  -2  -5 1101.51   24.57
   6  -2  -5 1170.15   24.67
   6  -2  -5 1047.51   23.91
   6  -2  -5 1073.90   22.78
   6  -2  -5 1062.08   23.75
   6  -2  -5 1065.66   24.42
  -6   2   4 1503.38   29.24
  -6   2   4 1605.49   31.15
   6  -2  -4 1473.23   30.96
   6  -2  -4 1602.95   31.61
   6  -2  -4 1471.90   31.05
   6  -2  -4 1467.77   29.31
   6  -2  -4 1623.10   31.22
   6  -2  -4 1511.31   31.13
  -6   2   3 1292.13   25.56
  -6   2   3 1217.94   24.38
   6  -2  -3 1080.79   24.30
   6  -2  -3 1263.94   26.09
   6  -2  -3 1173.62   23.59
   6  -2  -3 1296.35   25.78
   6  -2  -3 1081.74   24.36
   6  -2  -2 2075.07   38.15
  -6   2   2 2035.47   37.12
   6  -2  -2 1846.24   35.30
   6  -2  -2 2056.40   37.51
   6  -2  -2 2081.52   37.01
   6  -2  -2 1800.27   34.36
   6  -2  -2 1817.38   35.27
  -6   2   1  423.70   12.50
   6  -2  -1  436.23   12.33
   6  -2  -1  429.93   12.07
   6  -2  -1  433.56   12.16
   6  -2  -1  416.27   12.22
   6  -2  -1  448.72   12.22
  -6   2   0  168.00    7.33
   6  -2   0  157.81    6.44
   6  -2   0  170.96    6.69
   6  -2   0  168.38    6.27
   6  -2   0  161.27    6.79
   6  -2   0  164.30    6.53
   6  -2   1   40.42    3.04
   6  -2   1   40.11    2.61
   6  -2   1   45.52    3.19
   6  -2   1   41.81    3.01
   6  -2   1   46.31    3.48
   6  -2   1   41.35    3.19
   6  -2   1   42.26    3.05
  -6   2  -1   46.79    3.87
   6  -2   2    5.93    1.33
   6  -2   2   10.29    1.58
   6  -2   2    8.60    1.68
   6  -2   2    7.18    1.65
   6  -2   2    5.67    1.32
   6  -2   2    6.32    1.29
   6  -2   3  461.14   11.69
   6  -2   3  492.48   12.31
   6  -2   3  499.57   12.54
   6  -2   3  463.72   11.66
   6  -2   4  146.03    5.57
   6  -2   4  169.40    6.44
   6  -2   4  181.38    6.55
   6  -2   4  175.25    6.07
   6  -2   4  154.72    6.01
   6  -2   5   48.40    3.40
   6  -2   5   52.07    3.45
   6  -2   5   44.38    3.12
   6  -2   6    8.55    1.52
   6  -2   6   10.56    1.57
   6  -2   6    7.57    1.44
   6  -2   7  456.26   10.95
   6  -2   7  541.53   11.15
  -6   1   9  180.23    5.53
   6  -1  -9  194.00    6.84
   6  -1  -9  175.90    5.55
   6  -1  -9  158.16    5.05
  -6   1   9  160.30    5.52
   6  -1  -9  187.90    6.77
  -6   1   8  101.18    4.68
   6  -1  -8  112.05    5.75
   6  -1  -8  102.74    4.91
   6  -1  -8   84.64    4.07
  -6   1   8   93.79    4.70
   6  -1  -8  110.84    5.72
  -6   1   7   32.86    2.91
   6  -1  -7   32.11    3.09
   6  -1  -7   22.95    2.34
   6  -1  -7   27.05    2.49
  -6   1   6  892.15   19.71
  -6   1   6  873.77   20.29
   6  -1  -6  928.58   21.55
   6  -1  -6  930.93   20.68
   6  -1  -6  838.33   20.35
   6  -1  -6  784.00   18.34
   6  -1  -6  883.69   19.67
   6  -1  -6  924.68   21.59
  -6   1   5  102.23    5.28
   6  -1  -5  106.29    5.98
   6  -1  -5  111.25    5.94
   6  -1  -5   98.62    5.64
   6  -1  -5   92.93    4.53
   6  -1  -5  109.47    5.66
   6  -1  -5  101.34    5.91
   6  -1  -4    2.71    1.47
   6  -1  -4    1.06    1.77
  -6   1   4    1.91    1.29
   6  -1  -4    2.35    1.39
  -6   1   4    2.70    1.34
   6  -1  -4    2.48    1.34
   6  -1  -4    1.63    1.35
   6  -1  -4    1.83    1.01
   6  -1  -4    0.69    1.44
  -6   1   3   31.20    3.18
  -6   1   3   34.20    3.05
   6  -1  -3   29.62    2.93
   6  -1  -3   33.53    3.33
   6  -1  -3   27.90    2.83
   6  -1  -3   35.28    3.36
   6  -1  -3   31.22    3.01
  -6   1   2   42.93    3.69
   6  -1  -2   39.21    3.07
   6  -1  -2   38.56    3.42
   6  -1  -2   38.27    3.17
   6  -1  -2   48.10    3.83
   6  -1  -2   39.98    3.11
  -6   1   1   68.96    4.89
   6  -1  -1   65.06    4.16
   6  -1  -1   57.00    3.34
   6  -1  -1   63.58    4.17
   6  -1  -1   68.14    4.17
   6  -1  -1   60.78    4.18
   6  -1  -1   71.36    4.43
   6  -1  -1   56.67    3.35
   6  -1   0  756.18   17.22
   6  -1   0  760.50   17.54
   6  -1   0  727.57   17.61
   6  -1   0  781.57   18.14
  -6   1   0  776.72   19.65
   6  -1   1   44.63    3.29
   6  -1   1   42.10    2.89
   6  -1   1   40.98    2.83
   6  -1   1   39.18    3.07
   6  -1   1   45.12    3.25
   6  -1   2  162.11    6.20
   6  -1   2  148.09    5.94
   6  -1   2  164.17    6.58
   6  -1   2  159.50    6.57
   6  -1   2  147.78    5.61
   6  -1   3    5.17    1.31
   6  -1   3    4.86    1.45
   6  -1   3    5.80    1.37
   6  -1   3    6.94    1.66
   6  -1   3    5.61    1.40
   6  -1   4  707.61   16.18
   6  -1   4  737.21   17.00
   6  -1   4  806.47   17.43
   6  -1   4  767.26   16.61
   6  -1   4  673.24   16.16
   6  -1   5  291.94    9.10
   6  -1   5  288.21    7.96
   6  -1   5  287.74    8.72
   6  -1   6    7.48    1.62
   6  -1   6    7.44    1.47
   6  -1   7  134.96    4.87
  -6   0   9   44.76    2.93
   6   0  -9   47.30    3.30
  -6   0   9   38.31    2.38
   6   0  -9   48.74    3.39
  -6   0   8  276.38    8.68
   6   0  -8  285.62    9.51
   6   0  -8  259.31    8.39
   6   0  -8  215.23    6.64
  -6   0   8  235.58    7.69
   6   0  -8  283.83    9.55
   6   0  -7    7.64    2.10
  -6   0   7   13.29    2.06
   6   0  -7   10.13    2.17
   6   0  -7    5.70    1.18
   6   0  -7    7.30    1.53
   6   0  -7    8.38    1.95
  -6   0   6  111.00    5.67
   6   0  -6  112.42    5.90
   6   0  -6   98.33    5.65
   6   0  -6  105.10    5.35
  -6   0   5  115.18    5.76
  -6   0   5  118.17    6.09
   6   0  -5  101.20    5.92
   6   0  -5  101.63    5.66
   6   0  -5  100.48    5.78
   6   0  -5  102.38    5.54
   6   0  -5  106.55    6.07
  -6   0   4  563.26   15.02
  -6   0   4  569.79   14.68
   6   0  -4  530.80   14.81
   6   0  -4  517.95   13.38
   6   0  -4  543.75   15.06
   6   0  -4  579.89   15.05
   6   0  -4  520.95   14.75
   6   0  -3   23.70    3.05
  -6   0   3   27.36    3.08
   6   0  -3   26.15    2.81
   6   0  -3   26.05    2.97
   6   0  -3   25.15    2.64
   6   0  -3   29.11    3.12
   6   0  -3   30.81    3.02
  -6   0   2  199.53    8.51
   6   0  -2  185.68    7.12
   6   0  -2  195.94    7.54
   6   0  -2  172.32    7.01
   6   0  -2  191.94    7.85
   6   0  -2  189.91    7.23
  -6   0   1 1565.56   32.72
   6   0  -1 1643.31   31.00
   6   0  -1 1504.36   28.88
   6   0  -1 1537.61   29.93
   6   0  -1 1483.00   29.99
   6   0  -1 1448.39   30.44
   6   0  -1 1567.01   30.79
   6   0  -1 1502.09   28.96
  -6   0   0  599.02   14.27
   6   0   0  654.56   15.59
   6   0   0  582.12   14.15
   6   0   0  653.61   15.64
   6   0   0  596.14   15.06
   6   0   0  676.36   15.98
   6   0   1  302.85    9.34
   6   0   1  273.71    8.67
   6   0   1  268.57    8.26
   6   0   1  239.07    7.92
   6   0   1  308.89    9.34
   6   0   2  105.82    5.12
   6   0   2   95.24    4.85
   6   0   2  111.12    5.62
   6   0   2   99.69    4.75
   6   0   3   82.64    4.45
   6   0   3   75.92    4.28
   6   0   3   83.50    4.63
   6   0   3   85.68    4.70
   6   0   3   83.99    4.82
   6   0   4   99.47    4.60
   6   0   4   98.89    5.09
   6   0   4  102.42    5.13
   6   0   4   99.81    5.07
   6   0   5    8.45    1.78
   6   0   5    8.69    1.71
   6   0   5    6.85    1.44
   6   0   6  528.80   12.44
  -6   0  -6  517.28   12.43
   6   0   7   11.40    1.41
  -6   0  -7    7.26    1.31
   6   1  -9    1.62    1.06
   6   1  -9    2.31    1.12
  -6  -1   9    1.24    1.00
   6   1  -9    1.58    0.99
  -6  -1   8  322.79    9.81
   6   1  -8  337.65   10.51
   6   1  -8  312.38    9.51
   6   1  -8  340.07   10.59
  -6  -1   7  869.32   19.41
   6   1  -7  871.06   20.30
   6   1  -7  852.55   20.21
  -6  -1   6   19.52    2.65
  -6  -1   6   13.44    2.16
   6   1  -6   19.80    2.74
   6   1  -6   16.50    2.46
   6   1  -6   17.37    2.36
   6   1  -5    6.41    2.03
   6   1  -5    5.73    2.14
  -6  -1   5    5.06    1.62
   6   1  -5    6.11    1.96
  -6  -1   5    5.67    1.92
   6   1  -5    4.62    1.70
   6   1  -5    4.67    1.68
   6   1  -4   12.06    2.49
  -6  -1   4   14.72    2.42
   6   1  -4   14.12    2.42
   6   1  -4   14.42    2.48
   6   1  -4   11.73    1.91
   6   1  -4   13.30    2.38
   6   1  -4   15.26    2.42
   6   1  -4   14.94    2.44
   6   1  -3    3.67    1.49
   6   1  -3    2.21    1.66
   6   1  -3    2.25    1.42
   6   1  -3    4.19    1.35
   6   1  -3    6.58    1.87
   6   1  -3    2.78    1.61
   6   1  -3    1.36    1.43
   6   1  -2  527.23   13.78
   6   1  -2  517.84   13.64
   6   1  -2  502.73   13.19
   6   1  -2  514.84   14.44
   6   1  -2  526.19   13.79
  -6  -1   1   25.70    3.22
   6   1  -1   24.87    2.49
   6   1  -1   23.97    2.49
   6   1  -1   27.23    2.84
   6   1  -1   25.20    2.82
   6   1  -1   28.26    3.01
   6   1  -1   25.39    2.52
  -6  -1   0   61.50    3.94
   6   1   0   64.52    3.60
   6   1   0   65.12    4.26
   6   1   0   69.01    4.40
   6   1   0   57.43    3.89
   6   1   0   72.07    4.52
   6   1   0   64.98    3.62
   6   1   1  692.02   16.93
   6   1   1  725.02   16.73
   6   1   1  698.41   17.26
   6   1   1  699.96   16.75
   6   1   2  138.27    6.39
   6   1   2  139.04    6.08
   6   1   2  148.96    6.27
   6   1   2  142.36    5.84
   6   1   3  644.20   15.21
   6   1   3  577.69   14.91
   6   1   3  614.30   15.10
   6   1   3  650.90   16.00
  -6  -1  -3  567.02   14.25
   6   1   4  380.09   10.49
   6   1   4  339.19   10.52
   6   1   4  360.77   10.59
   6   1   4  366.69   10.93
  -6  -1  -4  357.88   10.28
   6   1   5  194.16    6.41
   6   1   5  190.08    6.86
   6   1   5  195.39    6.85
  -6  -1  -5  185.79    6.76
   6   1   6  300.08    7.93
  -6  -1  -6  270.82    7.71
   6   1   7   55.10    2.64
  -6  -2   9   47.81    3.02
   6   2  -9   46.28    3.01
   6   2  -9   48.77    3.07
  -6  -2   8   21.34    2.38
   6   2  -8   24.61    2.69
   6   2  -8   21.63    2.38
   6   2  -8   22.80    2.62
   6   2  -7    2.35    1.43
   6   2  -7    2.10    1.54
  -6  -2   7    3.02    1.45
   6   2  -7    0.98    1.02
   6   2  -7    1.17    1.41
   6   2  -6   11.88    2.32
  -6  -2   6    8.27    1.77
   6   2  -6   12.07    2.39
  -6  -2   6    9.84    2.09
   6   2  -6    8.97    1.96
   6   2  -6    9.93    1.91
  -6  -2   5  110.51    5.82
  -6  -2   5   92.07    5.18
   6   2  -5  100.61    5.55
   6   2  -5   94.45    5.56
   6   2  -5  100.30    5.43
  -6  -2   4   41.13    3.63
   6   2  -4   41.78    3.78
   6   2  -4   41.23    3.65
   6   2  -4   38.25    3.50
   6   2  -4   40.40    3.73
   6   2  -3  185.12    7.90
  -6  -2   3  164.64    7.48
   6   2  -3  181.00    7.59
   6   2  -3  174.77    7.29
   6   2  -3  171.63    6.63
   6   2  -3  171.43    7.69
   6   2  -3  199.01    7.95
   6   2  -3  179.09    7.57
  -6  -2   2   20.37    2.89
   6   2  -2   19.60    2.50
   6   2  -2   19.79    2.46
   6   2  -2   18.69    2.41
   6   2  -2   18.07    2.61
   6   2  -2   21.21    2.54
  -6  -2   1  164.31    7.98
  -6  -2   1  177.20    6.39
   6   2  -1  177.77    7.49
   6   2  -1  156.87    6.55
   6   2  -1  161.45    6.18
   6   2  -1  160.03    6.75
   6   2  -1  160.79    7.10
   6   2  -1  169.60    7.34
   6   2  -1  162.63    6.65
   6   2   0    2.25    1.56
  -6  -2   0    3.35    1.41
   6   2   0    2.91    1.15
   6   2   0    2.66    1.49
   6   2   0    3.48    1.54
   6   2   0    1.88    1.15
   6   2   0    2.36    1.45
   6   2   0    2.00    1.10
  -6  -2  -1  185.75    7.50
   6   2   1  200.93    7.56
   6   2   1  194.87    7.73
   6   2   1  183.36    7.40
  -6  -2  -2  702.53   17.21
   6   2   2  721.17   16.99
   6   2   2  703.43   16.43
   6   2   2  753.92   17.66
  -6  -2  -2  635.43   15.12
   6   2   2  655.50   15.82
  -6  -2  -3  590.24   15.52
   6   2   3  627.03   15.15
   6   2   3  614.33   14.64
  -6  -2  -4   67.50    4.47
   6   2   4   74.50    4.29
   6   2   4   73.15    4.19
   6   2   4   69.99    4.40
  -6  -2  -4   67.30    3.96
   6   2   5   15.51    1.84
  -6  -2  -5   10.37    1.94
   6   2   5    9.40    1.60
   6   2   5    9.22    1.66
  -6  -2  -5    9.61    1.61
  -6  -2  -6    8.36    1.57
   6   2   6    8.58    1.28
   6   2   6    6.53    1.09
  -6  -2  -6    6.36    1.28
   6   3  -8   36.17    2.93
   6   3  -8   34.18    2.88
   6   3  -7  229.07    8.34
   6   3  -7  227.91    8.37
   6   3  -6  390.65   12.05
   6   3  -6  385.14   12.01
   6   3  -5   13.96    2.45
  -6  -3   5   14.37    2.20
  -6  -3   5   11.56    1.85
   6   3  -5   15.13    2.43
   6   3  -5   14.66    2.37
  -6  -3   4   33.78    3.07
  -6  -3   4   34.28    3.27
   6   3  -4   35.39    3.33
   6   3  -4   40.24    3.67
   6   3  -4   33.70    3.36
   6   3  -4   35.69    3.37
   6   3  -4   40.83    3.71
   6   3  -3  174.76    7.47
  -6  -3   3  143.43    6.75
  -6  -3   3  170.12    7.17
   6   3  -3  158.17    7.23
   6   3  -3  161.67    6.76
   6   3  -3  159.63    6.09
   6   3  -3  155.21    7.18
   6   3  -3  171.23    7.31
   6   3  -3  158.43    7.25
  -6  -3   2 1568.30   29.47
  -6  -3   2 1600.90   32.46
   6   3  -2 1638.73   31.57
   6   3  -2 1460.31   29.78
   6   3  -2 1565.79   30.27
   6   3  -2 1478.59   31.48
   6   3  -2 1654.68   31.70
  -6  -3   1   88.61    5.76
  -6  -3   1   88.97    4.56
   6   3  -1   94.14    5.30
   6   3  -1   87.63    4.87
   6   3  -1   87.85    4.88
   6   3  -1   78.21    4.75
   6   3  -1   87.79    5.26
   6   3  -1   90.05    4.95
  -6  -3   0  115.96    5.44
   6   3   0  110.61    5.85
   6   3   0  110.45    5.25
   6   3   0   99.65    5.64
   6   3   0  112.28    5.81
   6   3   0  104.63    5.15
  -6  -3   0   98.24    6.18
  -6  -3  -1  265.10    9.06
   6   3   1  273.77    9.21
   6   3   1  246.44    8.97
   6   3   1  233.94    8.51
  -6  -3  -2    6.88    1.85
   6   3   2    5.71    1.44
   6   3   2    5.70    1.59
   6   3   2    6.03    1.81
  -6  -3  -2    6.91    1.43
   6   3   2    7.35    1.57
  -6  -3  -3  158.16    6.74
   6   3   3  155.38    6.67
  -6  -3  -3  144.49    5.70
  -6  -3  -4  835.47   18.12
   6   3   4  854.02   18.02
  -6  -3  -5  138.15    5.40
   6   3   5  143.05    5.26
   6   3   5  133.63    4.64
   6   3   5  133.90    5.20
  -6  -4   8   16.10    1.69
   6   4  -8   16.73    1.85
   6   4  -8   17.51    1.81
   6   4  -8   17.80    1.92
   6   4  -7    8.61    1.69
   6   4  -7    6.35    1.59
  -6  -4   7    4.78    1.26
  -6  -4   6  149.40    6.11
   6   4  -6  151.27    6.34
   6   4  -6  190.74    7.50
   6   4  -6  161.36    6.22
   6   4  -6  190.55    7.52
  -6  -4   5  210.22    7.62
   6   4  -5  239.60    8.91
   6   4  -5  230.94    8.25
   6   4  -5  230.80    8.80
  -6  -4   4  842.80   18.89
   6   4  -4  844.69   18.97
   6   4  -4  818.15   19.85
  -6  -4   3   30.58    2.59
   6   4  -3   34.71    3.31
  -6  -4   3   29.38    2.73
  -6  -4   3   29.52    2.78
   6   4  -3   34.38    3.34
   6   4  -3   29.96    2.79
   6   4  -3   27.77    3.02
   6   4  -3   32.23    3.20
   6   4  -3   33.35    3.29
  -6  -4   2   48.35    3.34
   6   4  -2   50.65    3.95
  -6  -4   2   39.86    3.43
  -6  -4   2   47.02    3.48
   6   4  -2   47.28    3.74
   6   4  -2   43.51    3.00
   6   4  -2   46.12    3.21
   6   4  -2   43.16    3.60
  -6  -4   2   39.86    2.78
   6   4  -2   46.25    3.82
   6   4  -2   48.64    3.81
  -6  -4   1  364.05   10.21
  -6  -4   1  333.28   10.99
   6   4  -1  388.14   11.28
   6   4  -1  343.33   10.62
   6   4  -1  342.33   10.20
  -6  -4   1  310.28    8.90
   6   4  -1  350.33   11.00
   6   4  -1  343.15   10.62
  -6  -4   0   65.93    4.72
  -6  -4   0   70.13    4.16
   6   4   0   65.00    4.59
   6   4   0   61.52    3.90
   6   4   0   66.18    4.21
  -6  -4   0   62.65    3.42
   6   4   0   61.29    4.24
   6   4   0   60.59    3.92
  -6  -4  -1   21.03    2.42
   6   4   1   21.41    2.55
   6   4   1   19.68    2.10
   6   4   1   18.08    2.38
  -6  -4  -1   17.22    1.84
   6   4   1   18.86    2.37
   6   4   1   17.90    2.02
  -6  -4  -2  456.61   11.76
   6   4   2  478.97   12.23
   6   4   2  436.27   12.01
  -6  -4  -2  422.50   10.18
  -6  -4  -2  392.17   10.21
   6   4   2  371.68   10.46
  -6  -4  -3  756.67   16.31
   6   4   3  726.12   16.66
  -6  -4  -3  708.50   14.56
  -6  -4  -3  679.57   14.90
  -6  -4  -4   14.74    1.87
   6   4   4   16.63    1.91
  -6  -4  -4   13.71    1.57
   6   4   5    5.98    1.12
  -6  -4  -5    5.89    1.10
   6   4   5    5.75    1.07
   6   5  -7    3.79    1.13
   6   5  -7    4.37    1.19
   6   5  -7    3.76    1.10
  -6  -5   6  277.55    7.84
   6   5  -6  315.50    8.74
   6   5  -6  372.39   10.08
   6   5  -6  308.49    8.29
   6   5  -6  362.49    9.99
   6   5  -5    1.72    1.25
   6   5  -5    1.61    1.25
  -6  -5   5    1.09    0.92
   6   5  -5    1.43    1.10
   6   5  -5    1.03    1.09
  -6  -5   4   30.14    2.33
  -6  -5   4   28.03    2.37
   6   5  -4   30.35    2.55
  -6  -5   4   27.55    2.18
  -6  -5   3   22.08    2.18
  -6  -5   3   16.94    1.90
   6   5  -3   22.14    2.60
   6   5  -3   18.34    1.88
  -6  -5   3   17.71    1.83
   6   5  -3   19.78    2.48
   6   5  -3   23.07    2.64
  -6  -5   2  423.34   11.17
   6   5  -2  471.53   12.22
  -6  -5   2  384.93   10.38
   6   5  -2  445.18   12.25
  -6  -5   2  399.58   10.31
   6   5  -2  468.11   12.40
   6   5  -2  452.31   12.35
  -6  -5   1  274.02    8.53
   6   5  -1  296.81    9.28
  -6  -5   1  240.76    7.47
   6   5  -1  284.24    8.96
   6   5  -1  270.57    8.07
  -6  -5   1  262.76    7.67
   6   5  -1  270.69    9.06
   6   5  -1  289.01    9.06
  -6  -5   0  148.42    5.92
  -6  -5   0  136.04    5.01
   6   5   0  152.20    5.99
   6   5   0  144.31    5.88
  -6  -5   0  143.41    5.22
   6   5   0  148.56    6.27
   6   5   0  152.99    6.01
  -6  -5  -1    1.55    0.85
   6   5   1    0.69    1.14
  -6  -5  -1    0.90    1.01
   6   5   1    1.13    0.80
  -6  -5  -1    1.48    0.72
   6   5   1    0.86    1.02
   6   5   1    0.76    0.99
   6   5   1    1.11    0.83
  -6  -5  -2  124.15    4.95
   6   5   2  133.10    5.37
   6   5   2  113.61    4.99
  -6  -5  -2  109.65    4.12
   6   5   2   97.26    4.02
   6   5   3    0.25    0.91
  -6  -5  -3    0.46    0.82
   6   5   3    0.35    0.86
  -6  -5  -3    0.57    0.72
  -6  -5  -3    0.23    0.58
   6   6  -5  370.65    9.78
   6   6  -5  371.41    9.81
   6   6  -4  297.00    8.45
  -6  -6   3  201.25    6.24
   6   6  -3  208.18    7.06
   6   6  -3  215.26    7.00
   6   6  -3  208.30    7.06
  -6  -6   2  183.51    6.07
   6   6  -2  183.27    5.77
   6   6  -2  185.17    6.52
   6   6  -2  183.35    6.52
   6   6  -2  183.88    6.54
  -6  -6   1   50.88    3.10
   6   6  -1   52.48    3.06
   6   6  -1   48.24    3.11
  -6  -6   1   44.86    2.62
   6   6  -1   50.20    3.28
   6   6  -1   49.56    3.16
  -6  -6   0   18.08    1.94
   6   6   0   19.78    1.93
   6   6   0   19.04    1.86
   6   6   0   16.81    1.61
  -6  -6   0   15.64    1.56
   6   6   0   16.34    1.88
   6   6   0   18.06    1.83
  -6  -6  -1    0.25    0.61
   6   6   1    1.55    0.90
  -6  -6  -1    0.28    0.82
   6   6   1    0.43    0.71
   6   6   1    0.40    0.70
   6   6   2    0.44    0.70
  -6  -6  -2    0.10    0.69
   6   6   2    0.30    0.62
  -7   7   2   75.10    3.20
   7  -7  -2   75.48    3.22
  -7   7   1  454.11    9.69
   7  -7  -1  444.74    9.92
   7  -6  -5    7.25    1.08
   7  -6  -5    6.16    1.22
  -7   6   4    2.10    0.98
   7  -6  -4    2.27    0.97
   7  -6  -4    3.10    1.11
   7  -6  -4    3.04    0.98
   7  -6  -3    0.81    0.88
   7  -6  -3    0.98    0.96
   7  -6  -2   55.49    3.22
   7  -6  -2   65.75    3.69
   7  -6  -1    1.55    0.96
   7  -6  -1    4.57    1.18
   7  -6  -1    2.17    1.11
   7  -6   0   23.07    2.02
   7  -6   2    1.00    0.68
  -7   5   6   52.70    2.74
   7  -5  -6   61.52    2.92
   7  -5  -6   60.15    2.90
   7  -5  -6   59.52    3.09
  -7   5   5    7.65    1.25
   7  -5  -5    9.89    1.32
   7  -5  -5    9.88    1.54
   7  -5  -5    9.74    1.48
   7  -5  -5    9.03    1.65
   7  -5  -5    9.29    1.29
   7  -5  -4   17.35    2.07
   7  -5  -4   14.28    1.85
   7  -5  -4   16.12    2.13
  -7   5   4   12.30    1.50
   7  -5  -3  303.84    8.87
   7  -5  -3  250.99    7.99
   7  -5  -2  348.34    9.73
   7  -5  -2  407.10   11.07
   7  -5  -1  155.86    6.03
   7  -5  -1  153.79    6.13
   7  -5   0  106.53    4.71
   7  -5   0  109.03    4.77
   7  -5   1  356.91    9.10
   7  -5   1  324.97    8.61
   7  -5   2   85.99    3.79
   7  -5   2   93.99    3.67
   7  -4  -7  194.21    5.72
  -7   4   7  203.99    6.01
   7  -4  -6  240.81    7.58
   7  -4  -6  266.48    7.72
   7  -4  -6  235.39    6.84
   7  -4  -6  260.85    7.66
  -7   4   6  237.56    7.28
   7  -4  -6  243.43    7.60
   7  -4  -5  157.23    6.00
   7  -4  -5  180.11    6.71
   7  -4  -5  151.12    5.69
   7  -4  -5  173.60    6.45
  -7   4   5  160.00    6.04
   7  -4  -5  154.69    5.97
   7  -4  -4  240.50    7.65
   7  -4  -4  273.22    8.87
   7  -4  -4  247.12    7.77
   7  -4  -4  273.42    8.77
  -7   4   4  231.84    7.65
   7  -4  -4  236.17    7.62
   7  -4  -3    6.83    2.08
   7  -4  -3   16.53    1.98
   7  -4  -2    6.37    1.91
   7  -4  -2    7.56    1.78
   7  -4  -2    6.18    1.33
   7  -4  -2    7.81    1.87
   7  -4  -1  365.39   10.58
   7  -4  -1  337.23   11.16
   7  -4  -1  371.69   10.60
   7  -4   0   34.97    2.92
   7  -4   0   36.09    2.87
   7  -4   1    2.39    1.30
   7  -4   1    2.01    1.04
   7  -4   1    2.59    1.06
   7  -4   2  166.45    6.03
   7  -4   3  123.19    4.50
   7  -3  -7   62.54    3.71
  -7   3   7   49.20    2.45
   7  -3  -7   63.93    3.43
   7  -3  -7   54.68    2.76
   7  -3  -7   67.91    3.35
  -7   3   7   65.89    3.51
   7  -3  -7   66.51    3.81
   7  -3  -6    6.54    1.58
  -7   3   6    7.10    1.59
   7  -3  -6    6.72    1.55
   7  -3  -6    7.64    1.31
   7  -3  -6    8.23    1.60
   7  -3  -6    8.86    1.79
   7  -3  -5  109.70    5.39
   7  -3  -5  121.20    5.79
   7  -3  -5   98.67    4.48
   7  -3  -5  116.81    5.48
   7  -3  -5  100.10    5.22
   7  -3  -4  150.14    6.21
   7  -3  -4  173.12    7.18
   7  -3  -4  150.43    6.87
   7  -3  -4  146.44    5.61
   7  -3  -4  169.50    6.98
   7  -3  -4  150.70    6.23
   7  -3  -3   77.01    4.03
   7  -3  -3   76.89    4.89
   7  -3  -3   76.51    4.04
   7  -3  -2   96.18    5.26
   7  -3  -2   79.14    5.01
   7  -3  -2   85.12    4.95
   7  -3  -1  613.20   15.00
   7  -3  -1  577.40   14.84
   7  -3   0    9.32    2.01
   7  -3   0    9.47    1.88
   7  -3   0    8.35    1.73
   7  -3   0    9.22    1.76
   7  -3   1  183.68    6.31
   7  -3   1  203.60    6.67
   7  -3   2  205.59    6.63
   7  -3   2  203.81    7.18
   7  -3   3  712.67   15.11
   7  -3   3  714.85   15.28
   7  -3   4    4.59    1.09
   7  -3   5    0.04    0.61
   7  -2  -8  211.16    6.91
   7  -2  -8  209.69    6.14
   7  -2  -7  410.52   11.63
   7  -2  -7  433.35   11.16
   7  -2  -7  414.38   10.42
  -7   2   7  434.93   11.01
   7  -2  -7  420.74   11.77
   7  -2  -6   16.49    2.27
   7  -2  -6   15.35    2.27
   7  -2  -6   14.09    2.02
   7  -2  -6   16.59    2.27
  -7   2   5   17.36    1.98
   7  -2  -5   20.00    2.53
   7  -2  -5   17.13    2.51
   7  -2  -5   19.51    2.44
   7  -2  -5   18.97    2.44
  -7   2   4   71.77    3.96
   7  -2  -4   69.94    4.37
   7  -2  -4   64.97    4.44
   7  -2  -4   73.74    4.64
   7  -2  -4   67.02    4.27
  -7   2   3 4299.22   71.99
  -7   2   3 4080.14   72.92
   7  -2  -3 4194.77   72.02
   7  -2  -3 4587.19   74.68
   7  -2  -3 4398.15   74.14
   7  -2  -3 4117.50   71.94
   7  -2  -2   10.74    2.25
  -7   2   2   12.15    1.94
  -7   2   2    9.54    1.83
   7  -2  -2   15.03    2.37
   7  -2  -2   10.29    2.06
   7  -2  -2   11.55    2.21
   7  -2  -2   10.41    2.21
  -7   2   1  115.79    5.86
   7  -2  -1  138.81    6.19
   7  -2  -1  136.27    6.25
   7  -2  -1  124.85    6.22
   7  -2  -1  137.74    6.29
  -7   2   0  222.31    8.39
   7  -2   0  255.11    8.62
   7  -2   0  237.13    8.07
   7  -2   0  235.48    8.49
   7  -2   0  264.76    8.63
   7  -2   1   64.52    3.93
   7  -2   1   73.38    4.47
   7  -2   1   72.46    3.94
   7  -2   2   83.20    4.61
   7  -2   3  143.94    5.10
   7  -2   3  159.21    5.94
   7  -2   4  201.49    6.18
   7  -2   4  202.04    6.16
   7  -2   5   30.07    2.10
   7  -2   5   38.06    2.40
  -7   1   8    6.09    1.22
   7  -1  -8    7.55    1.37
   7  -1  -7    1.49    1.24
   7  -1  -7    2.27    1.28
  -7   1   7    2.24    0.99
   7  -1  -7    1.51    0.93
   7  -1  -7    1.69    1.28
  -7   1   6  136.68    5.65
   7  -1  -6  139.36    6.39
   7  -1  -6  138.66    6.23
   7  -1  -6  137.88    5.88
   7  -1  -6  139.94    6.40
  -7   1   5   33.32    2.90
  -7   1   5   23.59    2.75
   7  -1  -5   49.67    3.76
   7  -1  -5   31.37    2.77
   7  -1  -5   36.47    3.40
   7  -1  -5   29.92    2.96
   7  -1  -5   49.39    3.74
   7  -1  -4    3.14    1.42
  -7   1   4    3.22    1.43
   7  -1  -4    2.52    1.33
  -7   1   4    2.74    1.36
   7  -1  -4    3.15    1.42
   7  -1  -4    2.51    1.40
   7  -1  -4    4.78    1.76
   7  -1  -4    2.45    1.66
  -7   1   3  323.36   10.67
  -7   1   3  366.08   10.77
   7  -1  -3  332.56   10.08
   7  -1  -3  349.98   11.14
   7  -1  -3  351.84   10.50
   7  -1  -3  316.11   10.95
   7  -1  -3  351.19   11.04
   7  -1  -3  328.22   10.07
   7  -1  -2   14.39    2.45
  -7   1   2   12.66    2.21
   7  -1  -2   12.88    1.75
   7  -1  -2   12.98    2.18
   7  -1  -2   11.71    2.11
   7  -1  -2   12.60    2.32
   7  -1  -2   11.36    2.21
   7  -1  -2   12.78    1.75
  -7   1   1  366.86   11.87
   7  -1  -1  353.77   11.19
   7  -1  -1  362.50   10.91
   7  -1  -1  378.47   11.46
   7  -1  -1  344.34   11.10
   7  -1  -1  378.07   11.52
   7  -1   0    1.22    1.29
  -7   1   0    1.49    1.33
   7  -1   0    2.02    1.47
   7  -1   0    1.28    1.39
   7  -1   0    1.48    1.11
   7  -1   0    0.95    1.25
   7  -1   0    2.87    1.15
  -7   1  -1  232.11    9.39
   7  -1   1  244.40    8.45
   7  -1   1  261.65    8.17
   7  -1   2   48.65    3.28
  -7   1  -2   44.18    4.01
   7  -1   3  126.56    5.06
   7  -1   3  143.79    5.92
   7  -1   4   21.23    2.07
   7  -1   4   26.36    2.42
   7  -1   4   26.42    2.23
   7  -1   5    4.95    1.19
  -7   0   8   32.29    2.39
  -7   0   7   49.49    3.33
   7   0  -7   48.12    3.57
   7   0  -7   44.83    2.87
   7   0  -7   49.31    3.62
   7   0  -6    2.20    1.44
   7   0  -6    1.75    1.56
   7   0  -6    1.45    1.27
  -7   0   6    1.91    1.24
   7   0  -6    1.38    1.24
   7   0  -6    2.53    1.48
  -7   0   5  243.79    8.47
   7   0  -5  252.20    8.98
   7   0  -5  214.11    8.59
   7   0  -5  226.69    8.29
   7   0  -5  242.70    8.84
  -7   0   4  607.45   14.89
  -7   0   4  563.29   15.13
   7   0  -4  544.68   14.65
   7   0  -4  550.69   14.97
   7   0  -4  567.31   13.96
   7   0  -4  590.98   15.40
   7   0  -4  531.84   14.59
  -7   0   3  422.47   12.77
   7   0  -3  422.26   12.00
   7   0  -3  417.39   12.54
   7   0  -3  425.27   11.88
   7   0  -3  395.58   12.68
   7   0  -3  442.02   12.85
   7   0  -3  423.36   12.03
  -7   0   2  268.47    9.94
   7   0  -2  258.89    8.36
   7   0  -2  272.08    9.21
   7   0  -2  278.68    9.18
   7   0  -2  246.60    9.38
   7   0  -2  257.79    8.38
  -7   0   1   78.74    5.38
   7   0  -1   79.72    4.89
   7   0  -1   77.77    4.40
   7   0  -1   77.98    4.77
   7   0  -1   72.88    4.69
   7   0  -1   84.45    5.10
  -7   0   0  169.38    7.89
   7   0   0  173.21    7.17
   7   0   0  178.67    7.14
   7   0   0  178.65    7.24
  -7   0  -1  688.35   18.82
   7   0   1  720.89   17.50
   7   0   1  745.41   16.75
   7   0   2    0.39    1.04
  -7   0  -2    0.07    1.19
  -7   0  -2    1.44    1.14
   7   0   2    0.74    1.23
  -7   0  -3   20.46    2.34
   7   0   3   20.78    2.14
   7   0   3   22.47    2.40
   7   0   4   15.15    1.93
   7   0   4   15.88    1.84
  -7   0  -5    4.64    1.27
   7   0   5    5.01    1.21
   7   0   5    5.34    0.97
  -7  -1   8   53.32    3.13
   7   1  -8   52.83    3.28
   7   1  -8   54.88    3.38
  -7  -1   7   14.60    1.98
   7   1  -7   14.89    2.06
   7   1  -7   13.46    1.64
  -7  -1   6  304.06    9.41
   7   1  -6  293.53    9.70
   7   1  -6  271.16    8.79
   7   1  -6  298.81    9.80
   7   1  -5  819.06   19.23
   7   1  -5  781.11   18.73
   7   1  -5  781.57   18.58
   7   1  -5  828.23   19.31
  -7  -1   4   88.49    5.02
   7   1  -4   84.05    4.94
   7   1  -4   70.69    4.58
   7   1  -4   70.95    4.85
   7   1  -4   86.36    5.07
   7   1  -4   87.55    5.03
   7   1  -3  109.06    5.97
  -7  -1   3  122.88    6.16
   7   1  -3  113.47    5.62
   7   1  -3  105.99    5.51
   7   1  -3  110.93    5.26
   7   1  -3  101.87    5.83
   7   1  -3  113.70    5.94
   7   1  -3  106.93    5.48
   7   1  -2  143.31    6.80
  -7  -1   2  144.84    7.04
   7   1  -2  140.36    5.99
   7   1  -2  128.47    5.93
   7   1  -2  134.87    6.11
   7   1  -2  122.22    6.37
   7   1  -2  137.87    5.96
  -7  -1   1   50.07    4.28
   7   1  -1   41.36    3.01
   7   1  -1   48.23    3.56
   7   1  -1   45.78    3.67
   7   1  -1   53.31    4.04
  -7  -1   0  420.66   13.89
   7   1   0  466.84   12.86
   7   1   0  435.03   12.42
   7   1   0  464.54   12.82
  -7  -1  -1   63.00    3.74
   7   1   1   69.28    4.37
   7   1   1   63.68    4.36
   7   1   1   67.14    4.08
  -7  -1  -1   61.12    4.87
  -7  -1  -2  136.43    5.72
   7   1   2  139.92    6.19
  -7  -1  -3  647.33   15.32
   7   1   3  700.75   15.46
   7   1   3  664.32   15.42
   7   1   3  654.83   15.71
  -7  -1  -4   98.75    4.61
   7   1   4  108.74    4.29
   7   1   4  103.65    4.54
  -7  -1  -5   54.62    3.00
   7   1   5   59.64    3.09
  -7  -2   8   14.59    1.70
   7   2  -8   14.50    1.70
   7   2  -8   12.08    1.57
   7   2  -8   16.50    1.80
  -7  -2   7    0.82    1.02
   7   2  -7    0.73    0.72
  -7  -2   6   58.11    3.87
   7   2  -6   59.62    4.01
   7   2  -6   55.85    3.70
   7   2  -6   59.99    3.63
   7   2  -6   62.79    4.11
  -7  -2   5   26.91    2.88
   7   2  -5   28.31    2.94
   7   2  -5   24.84    2.72
   7   2  -5   28.60    2.84
   7   2  -5   25.97    2.86
  -7  -2   4  234.52    8.57
   7   2  -4  228.00    8.39
   7   2  -4  210.37    7.81
   7   2  -4  239.66    8.57
   7   2  -4  227.79    8.41
   7   2  -3  153.48    7.07
  -7  -2   3  138.83    6.60
  -7  -2   3  160.67    6.99
   7   2  -3  154.68    6.61
   7   2  -3  148.51    6.28
   7   2  -3  149.81    6.00
   7   2  -3  133.08    6.60
   7   2  -3  157.95    6.94
   7   2  -3  160.77    6.75
   7   2  -2  466.51   13.36
  -7  -2   2  416.25   12.98
   7   2  -2  454.10   12.15
   7   2  -2  426.61   11.38
   7   2  -2  466.49   12.02
   7   2  -2  414.85   12.64
   7   2  -2  450.52   12.17
  -7  -2   1  248.56    9.99
   7   2  -1  292.82    9.78
   7   2  -1  275.67    8.35
   7   2  -1  263.05    9.01
   7   2  -1  278.55    9.56
   7   2  -1  270.26    8.32
  -7  -2   0   97.41    4.42
   7   2   0   92.80    5.21
   7   2   0  103.29    5.36
  -7  -2  -1  136.61    5.51
   7   2   1  147.70    6.37
   7   2   1  126.68    6.17
   7   2   1  126.77    5.68
  -7  -2  -2   14.17    1.92
   7   2   2   14.85    2.15
   7   2   2   12.94    2.14
   7   2   2   15.50    2.21
  -7  -2  -3   87.57    4.27
   7   2   3   97.83    4.55
  -7  -2  -4  134.38    5.07
   7   2   4  132.33    5.06
   7   3  -7   55.87    3.36
   7   3  -7   49.53    2.96
   7   3  -7   57.76    3.40
   7   3  -6   42.41    2.99
   7   3  -6   42.37    2.87
  -7  -3   5   26.51    2.62
   7   3  -5   30.21    2.87
   7   3  -5   24.87    2.47
   7   3  -5   30.77    2.89
  -7  -3   4   51.80    3.66
   7   3  -4   61.80    4.05
   7   3  -4   51.18    3.43
   7   3  -4   59.20    3.91
   7   3  -4   59.85    4.02
   7   3  -3   37.93    3.35
  -7  -3   3   31.78    2.94
   7   3  -3   38.12    3.15
   7   3  -3   36.37    2.80
   7   3  -3   35.14    3.20
   7   3  -3   35.45    3.10
   7   3  -2  164.88    6.91
  -7  -3   2  137.85    6.29
   7   3  -2  150.84    6.18
   7   3  -2  145.67    5.66
   7   3  -2  155.50    6.28
  -7  -3   1  345.35    9.15
   7   3  -1  403.74   11.44
   7   3  -1  363.24    9.99
   7   3  -1  363.05   10.31
   7   3  -1  386.27   11.24
   7   3  -1  361.89   10.00
  -7  -3   0  392.20   10.13
   7   3   0  371.59   10.93
   7   3   0  398.88   11.33
  -7  -3  -1  118.59    4.84
   7   3   1  111.00    5.38
   7   3   1  102.77    4.76
  -7  -3  -2  199.07    6.46
   7   3   2  196.24    7.17
   7   3   2  193.83    6.88
  -7  -3  -3  650.81   14.12
   7   3   3  691.75   14.96
  -7  -3  -4   82.50    3.41
   7   3   4   86.75    3.51
   7   4  -6   17.20    1.62
   7   4  -5    0.47    0.91
   7   4  -5    0.43    0.93
  -7  -4   5    0.34    0.80
   7   4  -5    0.17    0.90
   7   4  -5   -0.03    0.80
   7   4  -4    0.70    1.04
   7   4  -4    0.27    1.08
   7   4  -4    0.16    0.97
  -7  -4   4    0.69    0.92
   7   4  -4    1.18    1.10
   7   4  -4    0.66    0.83
   7   4  -3  768.60   16.76
   7   4  -3  762.25   16.88
   7   4  -3  764.66   16.77
  -7  -4   2   15.09    1.85
   7   4  -2   16.28    1.99
   7   4  -2   15.64    1.64
   7   4  -2   16.17    1.98
   7   4  -1    2.54    0.97
   7   4  -1    1.32    1.17
  -7  -4   1    2.14    0.93
   7   4  -1    2.14    0.95
  -7  -4   1    2.50    1.08
   7   4  -1    2.67    1.00
   7   4  -1    2.30    1.22
  -7  -4   0   91.89    3.99
   7   4   0  104.12    4.84
  -7  -4   0   90.09    4.20
   7   4   0   88.91    4.23
   7   4   0   91.93    4.46
  -7  -4  -1  271.25    7.37
   7   4   1  290.87    8.43
  -7  -4  -1  250.46    7.17
   7   4   1  272.44    7.88
   7   4   1  233.60    7.04
  -7  -4  -2  426.21    9.63
   7   4   2  441.47   10.74
   7   4   2  431.52   10.16
   7   5  -4    7.80    1.36
   7   5  -4    9.16    1.40
   7   5  -4    8.80    1.42
   7   5  -3   29.81    2.36
   7   5  -3   28.24    2.37
   7   5  -3   28.84    2.31
   7   5  -2   74.60    3.62
   7   5  -2   65.82    3.35
   7   5  -2   66.33    3.38
  -7  -5   1  474.63   10.70
   7   5  -1  488.16   11.65
  -7  -5   0  126.91    4.29
   7   5   0  113.23    4.05
   8  -5  -3    0.28    0.80
   8  -5  -2    1.75    0.92
   8  -5  -2    1.43    0.85
   8  -5  -1   47.15    2.63
   8  -5  -1   50.66    2.76
   8  -4  -5   87.45    3.70
   8  -4  -4   49.81    3.02
  -8   4   4   35.03    2.17
   8  -4  -3  565.60   12.99
   8  -4  -2  439.62   11.23
   8  -4  -2  492.62   11.57
   8  -4  -1   43.21    2.75
   8  -4  -1   45.39    2.99
   8  -4   0   69.62    3.11
   8  -4   0   76.43    3.44
   8  -4   1    5.80    1.29
  -8   3   6    4.32    0.97
   8  -3  -6    6.01    1.06
   8  -3  -6    7.25    1.21
   8  -3  -5   58.07    3.33
   8  -3  -5   57.08    3.26
   8  -3  -4  106.17    4.84
   8  -3  -4  106.82    4.74
   8  -3  -3   55.13    3.54
   8  -3  -2    0.17    1.04
   8  -3  -2   -0.31    1.02
   8  -3  -2    0.15    0.97
   8  -3  -1  409.82   10.39
   8  -3  -1  446.81   11.09
   8  -3   0   77.66    3.40
   8  -3   0   95.75    4.16
   8  -2  -6  517.08   11.87
   8  -2  -6  523.55   11.55
   8  -2  -5   81.27    3.60
   8  -2  -5   86.78    4.15
   8  -2  -5   78.49    3.53
   8  -2  -4   84.32    4.50
   8  -2  -4   87.74    4.45
  -8   2   3   56.34    3.12
   8  -2  -3   62.55    3.89
  -8   2   2 1448.24   27.34
   8  -2  -2 1475.17   28.55
  -8   2   1  261.71    7.60
   8  -2  -1  263.18    8.19
   8  -2   0   24.32    2.27
   8  -2   1   10.91    1.76
   8  -2   2   67.53    3.53
   8  -2   3  149.79    4.79
  -8   1   6  124.36    4.36
   8  -1  -6  129.74    4.79
   8  -1  -6  133.24    4.80
   8  -1  -6  128.91    4.79
   8  -1  -5 1013.83   20.07
   8  -1  -5 1033.68   20.99
   8  -1  -5 1015.57   20.51
   8  -1  -5 1002.75   20.04
  -8   1   4   77.97    3.91
   8  -1  -4   77.37    4.30
   8  -1  -4   86.26    4.40
   8  -1  -4   76.86    3.67
  -8   1   3  120.56    5.18
   8  -1  -3  116.46    5.30
   8  -1  -2    0.51    1.31
  -8   1   2    0.04    0.99
   8  -1  -2    0.17    1.09
   8  -1  -2    0.52    1.13
   8  -1  -2   -0.15    1.00
   8  -1  -1   11.21    2.02
   8  -1  -1   11.04    1.88
   8  -1  -1   10.67    1.77
   8  -1  -1    8.27    1.36
   8  -1   0   80.68    4.42
   8  -1   0   83.70    4.54
   8  -1   0   83.68    4.17
   8  -1   1    1.20    0.98
   8  -1   2  363.64    9.71
   8  -1   3    1.50    0.93
   8  -1   3    1.17    0.79
  -8   0   6   67.46    3.45
   8   0  -6   70.52    3.49
   8   0  -6   70.28    3.58
   8   0  -6   70.22    3.39
   8   0  -6   70.31    3.50
   8   0  -5    3.01    1.04
   8   0  -5    2.20    1.48
   8   0  -5    2.87    1.03
  -8   0   5    2.53    1.08
   8   0  -5    2.86    1.16
   8   0  -5    1.91    1.20
  -8   0   4  178.35    6.41
   8   0  -4  165.87    5.79
   8   0  -4  170.03    6.33
   8   0  -4  178.25    6.56
   8   0  -4  163.89    5.77
  -8   0   3   46.40    3.29
   8   0  -3   40.58    3.04
  -8   0   2  186.74    6.90
   8   0  -2  180.16    6.82
   8   0  -1    0.64    1.21
   8   0  -1    0.96    1.19
   8   0  -1    0.83    1.14
   8   0   0   91.27    4.72
   8   0   0   90.73    4.69
   8   0   0   88.86    4.34
   8   0   1    9.66    1.66
   8   0   2  619.80   13.28
   8   0   3    4.41    1.06
  -8  -1   6  175.44    5.81
   8   1  -6  181.35    5.77
   8   1  -6  175.75    5.51
   8   1  -6  181.58    5.80
  -8  -1   5   76.84    3.94
   8   1  -5   74.66    3.66
   8   1  -5   69.55    3.65
   8   1  -5   71.69    3.78
   8   1  -5   75.15    3.68
  -8  -1   4  451.70   11.54
   8   1  -4  437.99   10.67
   8   1  -4  466.71   11.58
   8   1  -4  434.24   10.67
  -8  -1   3   44.75    3.26
   8   1  -3   38.24    2.64
  -8  -1   2    1.61    1.16
   8   1  -2    0.74    0.95
   8   1  -2    1.83    1.22
  -8  -1   1   39.01    3.12
   8   1  -1   34.48    2.86
   8   1  -1   36.47    2.91
   8   1   0   73.10    3.95
   8   1   0   69.37    3.71
   8   1   1    0.49    0.96
   8   1   1    1.44    1.00
   8   1   2   33.72    2.42
   8   1   3    6.54    1.15
  -8  -2   5  256.62    7.68
   8   2  -5  277.74    7.49
   8   2  -5  278.41    7.65
   8   2  -5  278.45    7.51
  -8  -2   4   69.98    3.75
   8   2  -4   68.24    3.42
   8   2  -4   66.57    3.18
   8   2  -4   69.45    3.80
   8   2  -4   69.55    3.42
  -8  -2   3   82.29    4.27
   8   2  -2    1.13    1.21
   8   2  -2    1.90    0.89
   8   2  -2    1.16    1.10
   8   2  -1   47.76    3.02
   8   2  -1   49.48    3.19
   8   2   0   13.82    1.90
   8   2   0   13.77    1.72
   8   2   0   16.41    1.73
   8   2   1    7.65    1.43
   8   2   1    7.93    1.35
   8   2   2  143.55    4.92
   8   3  -4    3.40    1.15
  -8  -3   4    3.82    1.03
   8   3  -4    2.84    1.01
  -8  -3   3   93.11    4.08
   8   3  -2    0.76    0.96
  -8  -3   2    0.61    0.82
   8   3  -2    0.79    0.65
   8   3  -2    0.35    0.83
  -8  -3   1   58.11    3.15
   8   3  -1   59.93    2.98
   8   3  -1   66.30    3.33
  -8  -3   0   68.09    3.28
   8   3   0   73.11    3.27
   9  -1  -2    1.15    0.80
   0   0   0    0.00    0.00


TITL 2019NCS0257_1b in P-1
REM P-1 (#2 in standard setting)
CELL 1.54178   7.487032   8.507562   9.650170  93.9055  98.4696  96.4574
ZERR    2.00   0.000191   0.000202   0.000220   0.0019   0.0020   0.0020
LATT  1
SFAC C H B N O
UNIT 2.00 22.00 10.00 8.00 20.00
TREF
HKLF 4
END
_computing_structure_solution     'SHELXT 2018/2 (Sheldrick, 2018)'
;
_shelx_hkl_checksum                12993
_olex2_diffrn_ambient_temperature_device  'Oxford Cryosystems'
_olex2_exptl_crystal_mounting_method 
 'The crystal was mounted on a MITIGEN holder in perfluoroether oil'
_olex2_submission_original_sample_id  'MAB/TR/AmGuan B5'
_olex2_submission_special_instructions  'No special instructions were received'
_oxdiff_exptl_absorpt_empirical_details
;
Empirical correction (ABSPACK) includes:
- Absorption correction using spherical harmonics
- Frame scaling
;
_oxdiff_exptl_absorpt_empirical_full_max  1.884
_oxdiff_exptl_absorpt_empirical_full_min  0.760
