# Supplementary material for: Structural (XRD) Characterization and an Analysis of H-Bonding Motifs in Some Tetrahydroxidohexaoxidopentaborate(1-) Salts of N-Substituted Guanidinium Cations
Source: Molecules. 2023 Apr 6;28(7):3273. doi: 10.3390/molecules28073273 (PMC10096507; doi:10.3390/molecules28073273)
Supplement: Supplementary file 1 [file molecules-28-03273-s001.zip › MAB3.cif]

data_MAB3

#2019ncs0334_1b

_audit_creation_date               2019-06-17
_audit_creation_method
;
Olex2 1.2
(compiled 2018.05.29 svn.r3508 for OlexSys, GUI svn.r5506)
;
_shelx_SHELXL_version_number       '2018/3'
_audit_contact_author_address      ?
_audit_contact_author_email        ?
_audit_contact_author_name         ''
_audit_contact_author_phone        ?
_publ_contact_author_id_orcid      ?
_publ_section_references
;
Dolomanov, O.V., Bourhis, L.J., Gildea, R.J, Howard, J.A.K. & Puschmann, H.
 (2009), J. Appl. Cryst. 42, 339-341.

Sheldrick, G.M. (2015). Acta Cryst. A71, 3-8.

Sheldrick, G.M. (2015). Acta Cryst. C71, 3-8.
;
_chemical_name_common              ?
_chemical_name_systematic          ?
_chemical_formula_moiety           'B5 H4 O10, C3 H10 N3'
_chemical_formula_sum              'C3 H14 B5 N3 O10'
_chemical_formula_weight           306.22
_chemical_melting_point            ?
_chemical_oxdiff_formula           'C12 H56 B20 N12 O40 '
_chemical_oxdiff_usercomment       'MAB/TR/Me2 Gaun B5'
loop_
  _atom_type_symbol
  _atom_type_description
  _atom_type_scat_dispersion_real
  _atom_type_scat_dispersion_imag
  _atom_type_scat_source
 'C' 'C' 0.0033 0.0016 'International Tables Vol C Tables 4.2.6.8 and 6.1.1.4'
 'H' 'H' 0.0000 0.0000 'International Tables Vol C Tables 4.2.6.8 and 6.1.1.4'
 'B' 'B' 0.0013 0.0007 'International Tables Vol C Tables 4.2.6.8 and 6.1.1.4'
 'N' 'N' 0.0061 0.0033 'International Tables Vol C Tables 4.2.6.8 and 6.1.1.4'
 'O' 'O' 0.0106 0.0060 'International Tables Vol C Tables 4.2.6.8 and 6.1.1.4'

_shelx_space_group_comment
;
The symmetry employed for this shelxl refinement is uniquely defined
by the following loop, which should always be used as a source of
symmetry information in preference to the above space-group names.
They are only intended as comments.
;
_space_group_crystal_system        'monoclinic'
_space_group_IT_number             14
_space_group_name_H-M_alt          'P 1 21/c 1'
_space_group_name_Hall             '-P 2ybc'
loop_
  _space_group_symop_operation_xyz
 'x, y, z'
 '-x, y+1/2, -z+1/2'
 '-x, -y, -z'
 'x, -y-1/2, z-1/2'

_cell_length_a                     9.9747(2)
_cell_length_b                     11.2563(3)
_cell_length_c                     11.6174(3)
_cell_angle_alpha                  90
_cell_angle_beta                   96.084(2)
_cell_angle_gamma                  90
_cell_volume                       1297.03(5)
_cell_formula_units_Z              4
_cell_measurement_reflns_used      10774
_cell_measurement_temperature      100(2)
_cell_measurement_theta_max        31.7600
_cell_measurement_theta_min        2.7270
_shelx_estimated_absorpt_T_max     0.996
_shelx_estimated_absorpt_T_min     0.961
_exptl_absorpt_coefficient_mu      0.142
_exptl_absorpt_correction_T_max    1.00000
_exptl_absorpt_correction_T_min    0.64305
_exptl_absorpt_correction_type     multi-scan
_exptl_absorpt_process_details
;
CrysAlisPro 1.171.40.45a (Rigaku Oxford Diffraction, 2019)
Empirical absorption correction using spherical harmonics,
 implemented in SCALE3 ABSPACK scaling algorithm.
;
_exptl_absorpt_special_details     ?
_exptl_crystal_colour              colourless
_exptl_crystal_colour_primary      colourless
_exptl_crystal_density_diffrn      1.568
_exptl_crystal_density_meas        ?
_exptl_crystal_density_method      ?
_exptl_crystal_description         plate
_exptl_crystal_F_000               632
_exptl_crystal_recrystallization_method  'The material was recrystallised'
_exptl_crystal_size_max            0.28
_exptl_crystal_size_mid            0.15
_exptl_crystal_size_min            0.03
_exptl_transmission_factor_max     ?
_exptl_transmission_factor_min     ?
_diffrn_reflns_av_R_equivalents    0.0191
_diffrn_reflns_av_unetI/netI       0.0123
_diffrn_reflns_Laue_measured_fraction_full  0.999
_diffrn_reflns_Laue_measured_fraction_max  0.999
_diffrn_reflns_limit_h_max         12
_diffrn_reflns_limit_h_min         -12
_diffrn_reflns_limit_k_max         14
_diffrn_reflns_limit_k_min         -14
_diffrn_reflns_limit_l_max         15
_diffrn_reflns_limit_l_min         -14
_diffrn_reflns_number              18168
_diffrn_reflns_point_group_measured_fraction_full  0.999
_diffrn_reflns_point_group_measured_fraction_max  0.999
_diffrn_reflns_theta_full          25.242
_diffrn_reflns_theta_max           27.483
_diffrn_reflns_theta_min           2.526
_diffrn_ambient_temperature        100(2)
_diffrn_detector                   'hybrid pixel detector'
_diffrn_detector_area_resol_mean   10
_diffrn_detector_dtime             0.000
_diffrn_detector_type              'Rigaku, HyPix 6000'
_diffrn_measured_fraction_theta_full  0.999
_diffrn_measured_fraction_theta_max  0.999
_diffrn_measurement_details
;
List of Runs (angles in degrees, time in seconds):

  # Type    Start    End  Width  t~exp~   \w     \q     \k     \f   Frames
--------------------------------------------------------------------------
  1  \w    -22.00  94.00   0.50    2.00    --    5.00  38.00  60.00  232
  2  \w    -24.00  94.00   0.50    2.00    --    5.00  60.00 120.00  236
  3  \w    -35.00  84.00   0.50    2.00    --   -5.30  60.00 150.00  238
  4  \w    -22.00  32.00   0.50    2.00    --    5.00  38.00 -90.00  108
;
_diffrn_measurement_device         'four-circle diffractometer'
_diffrn_measurement_device_details  'Rigaku, AFC12 \k goniometer'
_diffrn_measurement_device_type   
 'Rigaku FRE+ equipped with VHF Varimax confocal mirrors and an AFC12 goniometer and HyPix 6000 detector'
_diffrn_measurement_method         'profile data from \w-scans'
_diffrn_measurement_specimen_support  'MiTeGen MicroLoop'
_diffrn_orient_matrix_type        
 'CrysAlisPro convention (1999,Acta A55,543-557)'
_diffrn_orient_matrix_UB_11        -0.0561919000
_diffrn_orient_matrix_UB_12        -0.0380925000
_diffrn_orient_matrix_UB_13        0.0030620000
_diffrn_orient_matrix_UB_21        -0.0440033000
_diffrn_orient_matrix_UB_22        0.0469636000
_diffrn_orient_matrix_UB_23        -0.0197290000
_diffrn_orient_matrix_UB_31        0.0039425000
_diffrn_orient_matrix_UB_32        -0.0178901000
_diffrn_orient_matrix_UB_33        -0.0580493000
_diffrn_radiation_collimation      0.2
_diffrn_radiation_monochromator    'Confocal mirrors, VHF Varimax'
_diffrn_radiation_probe            x-ray
_diffrn_radiation_type             MoK\a
_diffrn_radiation_wavelength       0.71075
_diffrn_source                     'Rotating Anode'
_diffrn_source_current             55.0
_diffrn_source_power               2.475
_diffrn_source_target              Mo
_diffrn_source_type                'Rigaku FRE+'
_diffrn_source_voltage             45.0
_reflns_Friedel_coverage           0.000
_reflns_Friedel_fraction_full      .
_reflns_Friedel_fraction_max       .
_reflns_number_gt                  2722
_reflns_number_total               2969
_reflns_odcompleteness_completeness  99.84
_reflns_odcompleteness_iscentric   1
_reflns_odcompleteness_theta       27.42
_reflns_special_details
;
 Reflections were merged by SHELXL according to the crystal
 class for the calculation of statistics and refinement.
 
 _reflns_Friedel_fraction is defined as the number of unique
 Friedel pairs measured divided by the number that would be
 possible theoretically, ignoring centric projections and
 systematic absences.
;
_reflns_threshold_expression       'I > 2\s(I)'
_computing_cell_refinement         'CrysAlisPro 1.171.40.45a (Rigaku OD, 2019)'
_computing_data_collection         'CrysAlisPro 1.171.40.45a (Rigaku OD, 2019)'
_computing_data_reduction          'CrysAlisPro 1.171.40.45a (Rigaku OD, 2019)'
_computing_molecular_graphics      'Olex2 (Dolomanov et al., 2009)'
_computing_publication_material    'Olex2 (Dolomanov et al., 2009)'
_computing_structure_refinement    'ShelXL (Sheldrick, 2015)'
_computing_structure_solution      'ShelXT (Sheldrick, 2015)'
_refine_diff_density_max           0.268
_refine_diff_density_min           -0.227
_refine_diff_density_rms           0.047
_refine_ls_extinction_coef         .
_refine_ls_extinction_method       none
_refine_ls_goodness_of_fit_ref     1.035
_refine_ls_hydrogen_treatment      mixed
_refine_ls_matrix_type             full
_refine_ls_number_parameters       224
_refine_ls_number_reflns           2969
_refine_ls_number_restraints       0
_refine_ls_R_factor_all            0.0306
_refine_ls_R_factor_gt             0.0280
_refine_ls_restrained_S_all        1.035
_refine_ls_shift/su_max            0.000
_refine_ls_shift/su_mean           0.000
_refine_ls_structure_factor_coef   Fsqd
_refine_ls_weighting_details      
 'w=1/[\s^2^(Fo^2^)+(0.0498P)^2^+0.3631P] where P=(Fo^2^+2Fc^2^)/3'
_refine_ls_weighting_scheme        calc
_refine_ls_wR_factor_gt            0.0794
_refine_ls_wR_factor_ref           0.0811
_refine_special_details            ?
_olex2_refinement_description
;
1. Fixed Uiso
 At 1.5 times of:
  All C(H,H,H) groups
2.a Idealised Me refined as rotating group:
 C2(H2C,H2D,H2E), C3(H3C,H3D,H3E)
;
_atom_sites_solution_hydrogens     mixed
_atom_sites_solution_primary       dual
_atom_sites_solution_secondary     ?
loop_
  _atom_site_label
  _atom_site_type_symbol
  _atom_site_fract_x
  _atom_site_fract_y
  _atom_site_fract_z
  _atom_site_U_iso_or_equiv
  _atom_site_adp_type
  _atom_site_occupancy
  _atom_site_site_symmetry_order
  _atom_site_calc_flag
  _atom_site_refinement_flags_posn
  _atom_site_refinement_flags_adp
  _atom_site_refinement_flags_occupancy
  _atom_site_disorder_assembly
  _atom_site_disorder_group
 O1 O 0.26688(6) 0.55887(6) 0.77111(5) 0.01055(14) Uani 1 1 d . . . . .
 O2 O 0.33366(6) 0.50724(7) 0.96858(5) 0.01508(16) Uani 1 1 d . . . . .
 O3 O 0.10034(6) 0.52986(6) 0.90489(5) 0.01243(15) Uani 1 1 d . . . . .
 O4 O 0.04922(6) 0.65063(6) 0.73981(5) 0.01163(14) Uani 1 1 d . . . . .
 O5 O -0.09965(6) 0.54196(6) 0.60302(6) 0.01316(15) Uani 1 1 d . . . . .
 O6 O 0.07263(6) 0.43693(6) 0.72046(6) 0.01160(15) Uani 1 1 d . . . . .
 O7 O 0.49485(7) 0.55009(6) 0.83728(6) 0.01391(15) Uani 1 1 d . . . . .
 O8 O 0.17420(7) 0.47818(8) 1.09975(6) 0.02200(18) Uani 1 1 d . . . . .
 O9 O -0.14270(7) 0.74209(6) 0.63715(6) 0.01574(16) Uani 1 1 d . . . . .
 O10 O -0.09045(7) 0.33538(6) 0.59158(6) 0.01568(16) Uani 1 1 d . . . . .
 B1 B 0.12273(10) 0.54472(9) 0.78250(8) 0.01011(19) Uani 1 1 d . . . . .
 B2 B 0.36399(10) 0.53817(9) 0.85856(9) 0.01081(19) Uani 1 1 d . . . . .
 B3 B 0.19839(10) 0.50502(10) 0.99061(9) 0.0138(2) Uani 1 1 d . . . . .
 B4 B -0.06096(10) 0.64621(9) 0.66045(9) 0.0119(2) Uani 1 1 d . . . . .
 B5 B -0.03564(10) 0.43743(9) 0.63925(9) 0.0116(2) Uani 1 1 d . . . . .
 N1 N 0.50495(8) 0.66569(7) 0.42009(7) 0.01368(17) Uani 1 1 d . . . . .
 N2 N 0.34791(8) 0.63013(8) 0.54899(7) 0.01567(18) Uani 1 1 d . . . . .
 N3 N 0.57163(8) 0.65018(8) 0.61699(7) 0.01572(18) Uani 1 1 d . . . . .
 C1 C 0.47468(9) 0.64857(8) 0.52769(8) 0.01245(18) Uani 1 1 d . . . . .
 C2 C 0.39792(9) 0.66175(9) 0.32365(8) 0.01507(19) Uani 1 1 d . . . . .
 H2C H 0.353754 0.583908 0.321818 0.023 Uiso 1 1 calc GR . . . .
 H2D H 0.436890 0.674754 0.250708 0.023 Uiso 1 1 calc GR . . . .
 H2E H 0.331481 0.723967 0.333868 0.023 Uiso 1 1 calc GR . . . .
 C3 C 0.64521(9) 0.68415(9) 0.39700(8) 0.01589(19) Uani 1 1 d . . . . .
 H3C H 0.678143 0.759592 0.431332 0.024 Uiso 1 1 calc GR . . . .
 H3D H 0.650038 0.686283 0.313211 0.024 Uiso 1 1 calc GR . . . .
 H3E H 0.701152 0.618894 0.431036 0.024 Uiso 1 1 calc GR . . . .
 H2A H 0.3291(13) 0.6153(12) 0.6208(12) 0.021(3) Uiso 1 1 d . . . . .
 H2B H 0.2820(15) 0.6349(13) 0.4943(13) 0.027(3) Uiso 1 1 d . . . . .
 H9 H -0.1174(16) 0.8004(15) 0.6783(14) 0.037(4) Uiso 1 1 d . . . . .
 H3A H 0.6556(16) 0.6645(14) 0.6087(12) 0.031(4) Uiso 1 1 d . . . . .
 H8 H 0.0842(19) 0.4790(15) 1.1009(14) 0.043(4) Uiso 1 1 d . . . . .
 H3B H 0.5512(13) 0.6270(13) 0.6857(12) 0.022(3) Uiso 1 1 d . . . . .
 H10 H -0.0624(16) 0.2731(15) 0.6298(14) 0.039(4) Uiso 1 1 d . . . . .
 H7 H 0.5490(18) 0.5311(14) 0.8952(15) 0.040(4) Uiso 1 1 d . . . . .

loop_
  _atom_site_aniso_label
  _atom_site_aniso_U_11
  _atom_site_aniso_U_22
  _atom_site_aniso_U_33
  _atom_site_aniso_U_23
  _atom_site_aniso_U_13
  _atom_site_aniso_U_12
 O1 0.0075(3) 0.0144(3) 0.0093(3) 0.0010(2) -0.0008(2) -0.0006(2)
 O2 0.0072(3) 0.0272(4) 0.0104(3) 0.0042(3) -0.0008(2) 0.0008(3)
 O3 0.0072(3) 0.0196(3) 0.0103(3) 0.0016(2) -0.0002(2) 0.0007(2)
 O4 0.0099(3) 0.0108(3) 0.0132(3) -0.0002(2) -0.0032(2) 0.0004(2)
 O5 0.0119(3) 0.0122(3) 0.0139(3) 0.0001(2) -0.0053(2) 0.0001(2)
 O6 0.0097(3) 0.0105(3) 0.0136(3) 0.0005(2) -0.0032(2) -0.0003(2)
 O7 0.0077(3) 0.0228(4) 0.0108(3) 0.0035(3) -0.0011(2) 0.0001(2)
 O8 0.0092(3) 0.0446(5) 0.0120(3) 0.0070(3) 0.0002(2) 0.0010(3)
 O9 0.0133(3) 0.0124(3) 0.0196(3) -0.0014(3) -0.0069(3) 0.0017(2)
 O10 0.0144(3) 0.0119(3) 0.0190(3) 0.0006(3) -0.0064(3) -0.0010(2)
 B1 0.0075(4) 0.0122(5) 0.0101(4) 0.0007(3) -0.0014(3) -0.0004(3)
 B2 0.0096(4) 0.0114(4) 0.0110(4) 0.0003(3) -0.0005(3) 0.0000(3)
 B3 0.0089(4) 0.0199(5) 0.0122(4) 0.0013(4) -0.0003(3) 0.0007(4)
 B4 0.0097(4) 0.0136(5) 0.0119(4) 0.0014(4) -0.0008(3) -0.0006(4)
 B5 0.0094(4) 0.0135(5) 0.0116(4) 0.0007(4) -0.0001(3) -0.0009(3)
 N1 0.0108(4) 0.0180(4) 0.0120(4) 0.0016(3) 0.0001(3) -0.0006(3)
 N2 0.0109(4) 0.0246(4) 0.0111(4) 0.0026(3) -0.0006(3) -0.0020(3)
 N3 0.0108(4) 0.0240(4) 0.0119(4) 0.0025(3) -0.0007(3) -0.0013(3)
 C1 0.0130(4) 0.0112(4) 0.0129(4) 0.0001(3) 0.0000(3) 0.0006(3)
 C2 0.0150(4) 0.0184(5) 0.0112(4) 0.0013(3) -0.0015(3) 0.0004(3)
 C3 0.0119(4) 0.0211(5) 0.0149(4) 0.0021(4) 0.0026(3) -0.0001(3)

_geom_special_details
;
 All esds (except the esd in the dihedral angle between two l.s. planes)
 are estimated using the full covariance matrix.  The cell esds are taken
 into account individually in the estimation of esds in distances, angles
 and torsion angles; correlations between esds in cell parameters are only
 used when they are defined by crystal symmetry.  An approximate (isotropic)
 treatment of cell esds is used for estimating esds involving l.s. planes.
;
loop_
  _geom_bond_atom_site_label_1
  _geom_bond_atom_site_label_2
  _geom_bond_distance
  _geom_bond_site_symmetry_2
  _geom_bond_publ_flag
 O1 B1 1.4665(11) . ?
 O1 B2 1.3476(12) . ?
 O2 B2 1.3887(12) . ?
 O2 B3 1.4000(12) . ?
 O3 B1 1.4721(11) . ?
 O3 B3 1.3490(12) . ?
 O4 B1 1.4586(11) . ?
 O4 B4 1.3586(11) . ?
 O5 B4 1.3843(12) . ?
 O5 B5 1.3828(12) . ?
 O6 B1 1.4715(11) . ?
 O6 B5 1.3566(12) . ?
 O7 B2 1.3606(12) . ?
 O7 H7 0.845(18) . ?
 O8 B3 1.3498(12) . ?
 O8 H8 0.899(19) . ?
 O9 B4 1.3623(12) . ?
 O9 H9 0.835(17) . ?
 O10 B5 1.3642(12) . ?
 O10 H10 0.861(17) . ?
 N1 C1 1.3307(12) . ?
 N1 C2 1.4641(11) . ?
 N1 C3 1.4670(11) . ?
 N2 C1 1.3303(12) . ?
 N2 H2A 0.890(14) . ?
 N2 H2B 0.866(15) . ?
 N3 C1 1.3413(12) . ?
 N3 H3A 0.869(16) . ?
 N3 H3B 0.884(14) . ?
 C2 H2C 0.9800 . ?
 C2 H2D 0.9800 . ?
 C2 H2E 0.9800 . ?
 C3 H3C 0.9800 . ?
 C3 H3D 0.9800 . ?
 C3 H3E 0.9800 . ?

loop_
  _geom_angle_atom_site_label_1
  _geom_angle_atom_site_label_2
  _geom_angle_atom_site_label_3
  _geom_angle
  _geom_angle_site_symmetry_1
  _geom_angle_site_symmetry_3
  _geom_angle_publ_flag
 B2 O1 B1 123.13(7) . . ?
 B2 O2 B3 118.75(7) . . ?
 B3 O3 B1 124.35(7) . . ?
 B4 O4 B1 122.83(7) . . ?
 B5 O5 B4 118.58(7) . . ?
 B5 O6 B1 122.76(7) . . ?
 B2 O7 H7 112.0(12) . . ?
 B3 O8 H8 106.9(11) . . ?
 B4 O9 H9 111.8(11) . . ?
 B5 O10 H10 112.5(11) . . ?
 O1 B1 O3 110.50(7) . . ?
 O1 B1 O6 109.31(7) . . ?
 O4 B1 O1 110.06(7) . . ?
 O4 B1 O3 107.40(7) . . ?
 O4 B1 O6 112.02(7) . . ?
 O6 B1 O3 107.51(7) . . ?
 O1 B2 O2 121.86(8) . . ?
 O1 B2 O7 118.21(8) . . ?
 O7 B2 O2 119.92(8) . . ?
 O3 B3 O2 119.91(8) . . ?
 O3 B3 O8 123.51(9) . . ?
 O8 B3 O2 116.58(8) . . ?
 O4 B4 O5 121.48(8) . . ?
 O4 B4 O9 122.00(9) . . ?
 O9 B4 O5 116.45(8) . . ?
 O6 B5 O5 121.54(8) . . ?
 O6 B5 O10 122.28(8) . . ?
 O10 B5 O5 116.14(8) . . ?
 C1 N1 C2 119.66(8) . . ?
 C1 N1 C3 120.54(8) . . ?
 C2 N1 C3 119.77(7) . . ?
 C1 N2 H2A 120.2(9) . . ?
 C1 N2 H2B 121.1(9) . . ?
 H2A N2 H2B 118.7(13) . . ?
 C1 N3 H3A 122.8(9) . . ?
 C1 N3 H3B 118.5(9) . . ?
 H3A N3 H3B 118.2(13) . . ?
 N1 C1 N3 120.52(8) . . ?
 N2 C1 N1 120.81(8) . . ?
 N2 C1 N3 118.67(8) . . ?
 N1 C2 H2C 109.5 . . ?
 N1 C2 H2D 109.5 . . ?
 N1 C2 H2E 109.5 . . ?
 H2C C2 H2D 109.5 . . ?
 H2C C2 H2E 109.5 . . ?
 H2D C2 H2E 109.5 . . ?
 N1 C3 H3C 109.5 . . ?
 N1 C3 H3D 109.5 . . ?
 N1 C3 H3E 109.5 . . ?
 H3C C3 H3D 109.5 . . ?
 H3C C3 H3E 109.5 . . ?
 H3D C3 H3E 109.5 . . ?

loop_
  _geom_hbond_atom_site_label_D
  _geom_hbond_atom_site_label_H
  _geom_hbond_atom_site_label_A
  _geom_hbond_distance_DH
  _geom_hbond_distance_HA
  _geom_hbond_distance_DA
  _geom_hbond_angle_DHA
  _geom_hbond_site_symmetry_A
  _geom_hbond_publ_flag
 C2 H2E O1 0.98 2.61 3.4354(12) 141.7 4_575 yes
 N2 H2A O1 0.890(14) 2.017(14) 2.8978(10) 170.2(13) . yes
 N2 H2B O5 0.866(15) 2.848(15) 3.4751(10) 130.6(12) 3_566 yes
 N2 H2B O10 0.866(15) 2.087(15) 2.9195(10) 161.1(13) 3_566 yes
 O9 H9 O3 0.835(17) 2.769(16) 3.3096(10) 124.1(13) 2_556 yes
 O9 H9 O6 0.835(17) 1.958(17) 2.7911(10) 175.3(16) 2_556 yes
 N3 H3A O9 0.869(16) 2.186(16) 3.0171(11) 160.1(13) 1_655 yes
 O8 H8 O3 0.899(19) 1.837(19) 2.7347(10) 175.3(16) 3_567 yes
 O8 H8 O4 0.899(19) 2.801(18) 3.3799(10) 123.3(13) 3_567 yes
 N3 H3B O7 0.884(14) 2.091(14) 2.9700(10) 172.2(13) . yes
 O10 H10 O3 0.861(17) 2.787(17) 3.4408(10) 134.0(13) 2_546 yes
 O10 H10 O4 0.861(17) 2.042(17) 2.8566(9) 157.5(15) 2_546 yes
 O7 H7 O2 0.845(18) 1.915(18) 2.7589(9) 177.1(17) 3_667 yes
 O7 H7 O8 0.845(18) 2.758(18) 3.3199(10) 125.5(14) 3_667 yes

loop_
  _geom_torsion_atom_site_label_1
  _geom_torsion_atom_site_label_2
  _geom_torsion_atom_site_label_3
  _geom_torsion_atom_site_label_4
  _geom_torsion
  _geom_torsion_site_symmetry_1
  _geom_torsion_site_symmetry_2
  _geom_torsion_site_symmetry_3
  _geom_torsion_site_symmetry_4
  _geom_torsion_publ_flag
 B1 O1 B2 O2 -3.25(13) . . . . ?
 B1 O1 B2 O7 177.74(8) . . . . ?
 B1 O3 B3 O2 8.45(14) . . . . ?
 B1 O3 B3 O8 -172.06(9) . . . . ?
 B1 O4 B4 O5 -9.06(13) . . . . ?
 B1 O4 B4 O9 167.75(8) . . . . ?
 B1 O6 B5 O5 5.20(13) . . . . ?
 B1 O6 B5 O10 -172.52(8) . . . . ?
 B2 O1 B1 O3 11.53(12) . . . . ?
 B2 O1 B1 O4 129.98(8) . . . . ?
 B2 O1 B1 O6 -106.59(9) . . . . ?
 B2 O2 B3 O3 1.60(14) . . . . ?
 B2 O2 B3 O8 -177.94(9) . . . . ?
 B3 O2 B2 O1 -4.13(14) . . . . ?
 B3 O2 B2 O7 174.85(9) . . . . ?
 B3 O3 B1 O1 -14.28(12) . . . . ?
 B3 O3 B1 O4 -134.34(9) . . . . ?
 B3 O3 B1 O6 104.94(9) . . . . ?
 B4 O4 B1 O1 128.12(8) . . . . ?
 B4 O4 B1 O3 -111.55(9) . . . . ?
 B4 O4 B1 O6 6.29(11) . . . . ?
 B4 O5 B5 O6 -7.18(13) . . . . ?
 B4 O5 B5 O10 170.67(8) . . . . ?
 B5 O5 B4 O4 9.08(13) . . . . ?
 B5 O5 B4 O9 -167.89(8) . . . . ?
 B5 O6 B1 O1 -126.65(8) . . . . ?
 B5 O6 B1 O3 113.38(9) . . . . ?
 B5 O6 B1 O4 -4.39(11) . . . . ?
 C2 N1 C1 N2 -1.28(13) . . . . ?
 C2 N1 C1 N3 179.06(9) . . . . ?
 C3 N1 C1 N2 -179.06(9) . . . . ?
 C3 N1 C1 N3 1.28(14) . . . . ?

_shelx_res_file
;
TITL 2019ncs0334_1b_a.res in P2(1)/c
    2019ncs0334_1b.res
    created by SHELXL-2018/3 at 10:20:53 on 17-Jun-2019
REM Old TITL 2019ncs0334_1b in P2(1)/c
REM SHELXT solution in P2(1)/c: R1 0.106, Rweak 0.010, Alpha 0.017
REM <I/s> 0.537 for 147 systematic absences, Orientation as input
REM Formula found by SHELXT: C7 B N2 O11
CELL 0.71075 9.9747 11.2563 11.6174 90 96.084 90
ZERR 4 0.0002 0.0003 0.0003 0 0.002 0
LATT 1
SYMM -X,0.5+Y,0.5-Z
SFAC C H B N O
UNIT 12 56 20 12 40
EQIV $1 1-X,1-Y,2-Z
EQIV $2 -X,1-Y,2-Z
EQIV $3 -X,0.5+Y,1.5-Z
EQIV $4 -X,-0.5+Y,1.5-Z
EQIV $5 -X,1-Y,1-Z
EQIV $6 1+X,+Y,+Z
EQIV $7 +X,1.5-Y,-0.5+Z

L.S. 8
PLAN  20
SIZE 0.03 0.15 0.28
TEMP -173(2)
HTAB O7 O2_$1
HTAB O7 O8_$1
HTAB O8 O3_$2
HTAB O8 O4_$2
HTAB O9 O3_$3
HTAB O9 O6_$3
HTAB O10 O3_$4
HTAB O10 O4_$4
HTAB N2 O1
HTAB N2 O5_$5
HTAB N2 O10_$5
HTAB N3 O7
HTAB N3 O9_$6
HTAB C2 O1_$7
BOND $H
CONF
MORE -1
fmap 2 53
acta
REM <olex2.extras>
REM <HklSrc "%.\\2019ncs0334_1b.hkl">
REM </olex2.extras>

WGHT    0.049800    0.363100
FVAR       0.78319
O1    5    0.266880    0.558866    0.771106    11.00000    0.00753    0.01443 =
         0.00933    0.00101   -0.00080   -0.00059
O2    5    0.333660    0.507243    0.968579    11.00000    0.00718    0.02724 =
         0.01044    0.00420   -0.00085    0.00084
O3    5    0.100336    0.529858    0.904890    11.00000    0.00715    0.01960 =
         0.01030    0.00157   -0.00016    0.00066
O4    5    0.049223    0.650630    0.739806    11.00000    0.00991    0.01085 =
         0.01317   -0.00022   -0.00324    0.00044
O5    5   -0.099651    0.541958    0.603023    11.00000    0.01194    0.01219 =
         0.01392    0.00007   -0.00526    0.00013
O6    5    0.072631    0.436927    0.720460    11.00000    0.00973    0.01050 =
         0.01362    0.00053   -0.00319   -0.00026
O7    5    0.494849    0.550095    0.837282    11.00000    0.00769    0.02279 =
         0.01081    0.00352   -0.00108    0.00014
O8    5    0.174201    0.478176    1.099753    11.00000    0.00919    0.04463 =
         0.01197    0.00696    0.00018    0.00100
O9    5   -0.142703    0.742086    0.637146    11.00000    0.01334    0.01243 =
         0.01959   -0.00141   -0.00693    0.00165
O10   5   -0.090454    0.335380    0.591583    11.00000    0.01437    0.01188 =
         0.01905    0.00057   -0.00635   -0.00105
B1    3    0.122733    0.544725    0.782497    11.00000    0.00751    0.01224 =
         0.01007    0.00073   -0.00138   -0.00044
B2    3    0.363991    0.538175    0.858559    11.00000    0.00963    0.01141 =
         0.01104    0.00032   -0.00053   -0.00004
B3    3    0.198385    0.505024    0.990610    11.00000    0.00885    0.01991 =
         0.01223    0.00125   -0.00035    0.00073
B4    3   -0.060964    0.646207    0.660446    11.00000    0.00967    0.01360 =
         0.01192    0.00138   -0.00083   -0.00061
B5    3   -0.035639    0.437435    0.639252    11.00000    0.00943    0.01352 =
         0.01161    0.00066   -0.00008   -0.00086
N1    4    0.504955    0.665688    0.420094    11.00000    0.01076    0.01805 =
         0.01199    0.00165    0.00012   -0.00063
N2    4    0.347908    0.630132    0.548989    11.00000    0.01090    0.02460 =
         0.01112    0.00264   -0.00057   -0.00195
N3    4    0.571629    0.650178    0.616991    11.00000    0.01080    0.02401 =
         0.01193    0.00251   -0.00075   -0.00128
C1    1    0.474679    0.648567    0.527687    11.00000    0.01297    0.01121 =
         0.01288    0.00015    0.00003    0.00057
C2    1    0.397922    0.661754    0.323650    11.00000    0.01501    0.01842 =
         0.01117    0.00127   -0.00146    0.00044
AFIX 137
H2C   2    0.353754    0.583908    0.321818    11.00000   -1.50000
H2D   2    0.436890    0.674754    0.250708    11.00000   -1.50000
H2E   2    0.331481    0.723967    0.333868    11.00000   -1.50000
AFIX   0
C3    1    0.645211    0.684146    0.397002    11.00000    0.01192    0.02114 =
         0.01488    0.00214    0.00260   -0.00008
AFIX 137
H3C   2    0.678143    0.759592    0.431332    11.00000   -1.50000
H3D   2    0.650038    0.686283    0.313211    11.00000   -1.50000
H3E   2    0.701152    0.618894    0.431036    11.00000   -1.50000
AFIX   0
H2A   2    0.329093    0.615325    0.620808    11.00000    0.02071
H2B   2    0.282024    0.634856    0.494296    11.00000    0.02724

H9    2   -0.117402    0.800416    0.678253    11.00000    0.03652
H3A   2    0.655639    0.664477    0.608708    11.00000    0.03098
H8    2    0.084188    0.478984    1.100915    11.00000    0.04287
H3B   2    0.551166    0.626973    0.685719    11.00000    0.02159
H10   2   -0.062374    0.273060    0.629775    11.00000    0.03893
H7    2    0.548984    0.531082    0.895213    11.00000    0.03980
HKLF 4


REM  2019ncs0334_1b_a.res in P2(1)/c
REM wR2 = 0.0811, GooF = S = 1.035, Restrained GooF = 1.035 for all data
REM R1 = 0.0280 for 2722 Fo > 4sig(Fo) and 0.0306 for all 2969 data
REM 224 parameters refined using 0 restraints

END

WGHT      0.0498      0.3631

REM Highest difference peak  0.268,  deepest hole -0.227,  1-sigma level  0.047
Q1    1   0.0820  0.5973  0.7555  11.00000  0.05    0.27
Q2    1   0.2033  0.5464  0.7797  11.00000  0.05    0.25
Q3    1   0.2744  0.5038  0.9760  11.00000  0.05    0.24
Q4    1  -0.0670  0.4949  0.6148  11.00000  0.05    0.23
Q5    1   0.4879  0.6599  0.4689  11.00000  0.05    0.23
Q6    1   0.5724  0.6741  0.4115  11.00000  0.05    0.23
Q7    1   0.0929  0.4948  0.7407  11.00000  0.05    0.22
Q8    1   0.1241  0.5374  0.8483  11.00000  0.05    0.21
Q9    1   0.3434  0.5225  0.9189  11.00000  0.05    0.21
Q10   1   0.5228  0.6565  0.5730  11.00000  0.05    0.21
Q11   1  -0.0145  0.6415  0.7157  11.00000  0.05    0.20
Q12   1   0.4548  0.6617  0.3772  11.00000  0.05    0.20
Q13   1   0.4048  0.6744  0.5414  11.00000  0.05    0.19
Q14   1   0.4145  0.6183  0.5355  11.00000  0.05    0.19
Q15   1   0.3077  0.5369  0.8054  11.00000  0.05    0.19
Q16   1  -0.0772  0.5890  0.6284  11.00000  0.05    0.19
Q17   1  -0.0987  0.6983  0.6475  11.00000  0.05    0.19
Q18   1   0.0241  0.4396  0.6865  11.00000  0.05    0.18
Q19   1   0.1485  0.5207  0.9375  11.00000  0.05    0.18
Q20   1   0.0408  0.5344  0.9260  11.00000  0.05    0.17
;
_shelx_res_checksum                81311
_shelx_hkl_file
;
   0   0  -2   10.45    0.67
   0   0   2   10.86    0.67
   0   0   2   10.02    0.58
   0   0  -2   10.86    0.59
   0   0   2   12.77    0.45
   0   0  -3   -0.34    0.62
   0   0   3    0.84    0.61
   0   0   3    0.13    0.51
   0   0   4 3490.13   72.18
   0   0   4 3423.89   71.86
   0   0  -4 3455.51   71.91
   0   0   4 3534.51   72.32
   0   0   5    0.67    1.00
   0   0  -5    0.25    0.61
   0   0   5   -0.16    0.81
   0   0   5   -0.10    0.53
   0   0  -6 2059.93   42.72
   0   0   6 2054.17   43.14
   0   0   6 2075.90   43.33
   0   0   6 2010.38   42.60
   0   0  -7    0.30    0.65
   0   0   7   -0.35    0.59
   0   0  -7   -0.61    0.84
   0   0   7   -0.11    1.11
   0   0   8  889.85   20.00
   0   0  -8  906.67   19.21
   0   0  -8  906.46   19.83
   0   0   8  934.95   19.82
   0   0   8  878.13   19.03
   0   0   9    0.09    0.81
   0   0  -9    0.48    0.79
   0   0  -9   -0.09    0.97
   0   0   9   -0.13    0.67
   0   0   9    0.30    1.15
   0   0   9   -0.51    1.33
   0   0  -9    0.87    1.18
   0   0  10   56.74    2.58
   0   0 -10   56.74    1.94
   0   0  10   56.93    1.94
   0   0 -10   54.14    2.56
   0   0  10   55.46    2.75
   0   0  10   56.10    1.75
   0   0  11   -0.09    0.86
   0   0  11   -0.72    0.77
   0   0  11   -0.90    1.34
   0   0  11    1.16    1.53
   0   0  12   56.78    3.07
   0   0  12   55.85    1.90
   0   0  12   57.44    1.77
   0   0  12   60.00    2.84
   0   0  13    2.08    1.73
   0   0  13    0.91    0.81
   0   0  13    1.24    1.55
   0   0  14   88.79    3.74
   0   0  15    0.72    1.72
   0  -1   1    0.12    0.29
   0   1  -1    0.35    0.30
   0  -1   1    0.17    0.29
   0   1  -1    0.89    0.30
   0   1  -2  476.80   10.61
   0  -1   2  472.40   10.61
   0  -1   2  477.55   10.54
   0   1   2  458.10   10.48
   0   1   3  208.17    4.69
   0   1  -3  213.42    4.85
   0  -1   3  209.51    4.83
   0   1  -3  208.07    4.96
   0   1   3  219.26    4.79
   0   1   3  208.05    4.69
   0  -1   3  210.16    4.98
   0   1   3  211.44    4.44
   0  -1   3  198.56    4.55
   0   1  -4    1.72    0.81
   0  -1   4    1.92    0.41
   0  -1   4    1.23    0.74
   0   1  -4    3.53    0.46
   0   1   4    1.81    0.54
   0   1   4    1.79    0.50
   0   1   4    1.96    0.33
   0  -1   4    2.85    0.69
   0   1   4    2.51    0.66
   0  -1  -4    2.74    0.66
   0   1   5  318.18    7.34
   0  -1   5  323.33    7.54
   0  -1   5  310.57    6.84
   0   1   5  316.80    7.20
   0   1  -5  320.76    6.88
   0   1   5  311.72    6.98
   0  -1  -5  317.40    7.11
   0  -1   5  312.39    7.33
   0   1   5  312.86    6.78
   0   1   6   57.74    2.20
   0  -1   6   59.21    1.63
   0   1  -6   59.23    1.67
   0  -1  -6   57.43    1.90
   0  -1  -6   58.56    2.08
   0   1   6   58.60    1.75
   0  -1   6   56.03    2.14
   0   1   6   56.96    1.57
   0   1   6   61.45    2.07
   0  -1   6   59.33    2.39
   0  -1   7  110.56    3.45
   0   1  -7   98.72    3.02
   0  -1   7  100.30    2.54
   0  -1   7   98.37    3.14
   0   1   7  101.52    2.50
   0   1  -7  103.56    2.59
   0   1   7  102.35    3.04
   0   1   7  100.47    3.21
   0   1   7  104.40    2.65
   0  -1  -7   94.79    2.79
   0  -1   8  865.91   19.23
   0   1  -8  839.89   18.21
   0  -1  -8  836.37   18.45
   0   1   8  876.51   18.86
   0  -1   8  865.90   18.99
   0   1   8  832.80   18.25
   0   1   8  862.17   18.12
   0   1  -8  850.56   18.77
   0  -1   8  863.27   18.18
   0   1   8  906.55   19.12
   0   1   9   11.90    0.83
   0   1   9   10.90    1.36
   0  -1  -9   11.58    1.14
   0   1  -9   11.35    0.95
   0   1  -9   10.82    1.54
   0  -1   9    7.97    1.56
   0   1   9    9.24    1.49
   0   1   9   10.09    0.90
   0  -1   9   10.99    1.43
   0  -1   9   10.72    0.86
   0   1  -9   10.07    1.32
   0   1 -10  377.31    8.64
   0   1  10  379.86    8.59
   0   1 -10  382.00    9.66
   0   1  10  386.45    9.73
   0   1  10  387.14    8.51
   0  -1  10  391.40    9.60
   0   1  10  414.21    9.55
   0  -1  10  392.28    9.89
   0   1 -10  404.80    9.33
   0   1  11   11.13    0.93
   0   1 -11    8.72    0.96
   0  -1  11   10.28    1.89
   0   1  11    9.78    0.83
   0   1 -11    8.93    1.75
   0   1  11   10.09    1.75
   0   1 -11    7.90    1.36
   0  -1  11   10.38    1.65
   0   1  11    8.41    1.50
   0  -1  11    9.31    1.25
   0  -1  12   24.29    1.52
   0   1  12   25.92    2.05
   0   1  12   23.02    1.06
   0  -1  12   25.53    2.15
   0  -1  12   26.87    2.37
   0   1 -12   22.94    1.77
   0   1  12   26.29    2.23
   0   1 -12   25.65    2.16
   0   1  12   24.71    1.17
   0   1  13   59.16    3.16
   0  -1  13   59.63    3.04
   0  -1  13   61.18    2.17
   0   1  13   58.14    1.82
   0   1  13   59.84    1.73
   0   1  13   58.70    2.92
   0  -1  14  139.84    4.87
   0   1  14  129.54    4.65
   0   2   0 7869.09  163.20
   0   2   1 1727.14   36.29
   0  -2   1 1736.16   36.49
   0   2  -1 1783.05   36.49
   0  -2   1 1743.71   36.51
   0   2  -1 1733.70   36.49
   0   2  -2    2.17    0.68
   0  -2   2    1.76    0.69
   0   2   2    2.99    0.74
   0  -2   2    1.89    0.63
   0   2  -2    1.92    0.71
   0  -2   3    2.61    0.65
   0   2  -3    2.47    0.68
   0   2   3    2.15    0.68
   0   2  -3    3.29    0.76
   0  -2  -3    2.50    0.24
   0  -2   3    2.43    0.77
   0   2  -4  248.20    6.20
   0   2   4  263.23    6.11
   0  -2   4  265.56    6.28
   0   2   4  284.05    6.10
   0  -2   4  261.83    6.40
   0   2  -4  269.98    6.42
   0   2   5  172.40    4.21
   0  -2   5  158.03    4.52
   0   2   5  164.90    4.08
   0   2   5  167.70    4.06
   0  -2   5  163.71    4.34
   0   2  -5  163.58    3.82
   0   2  -5  165.43    4.53
   0   2   5  163.97    3.58
   0   2   6   84.95    2.43
   0   2  -6   82.90    2.19
   0   2   6   80.60    2.50
   0   2   6   85.06    1.93
   0   2   6   84.10    2.63
   0  -2   6   82.57    2.93
   0   2  -6   75.59    2.91
   0  -2   6   81.66    2.74
   0   2   7    0.21    0.80
   0   2   7    2.75    0.94
   0   2   7    1.28    0.40
   0   2   7    0.55    0.72
   0   2  -7    1.20    0.63
   0  -2   7    0.92    1.04
   0  -2   7    1.29    1.12
   0   2   8  121.90    3.60
   0   2   8  122.74    2.83
   0  -2   8  123.21    3.82
   0   2  -8  122.96    3.09
   0   2  -8  124.89    3.71
   0   2   8  121.43    3.26
   0   2   8  127.75    3.78
   0  -2   8  125.87    4.09
   0  -2   9  970.00   20.83
   0   2   9  950.01   20.72
   0   2  -9  934.41   20.54
   0   2   9  926.34   20.45
   0  -2   9  949.18   21.06
   0   2   9  942.49   19.52
   0   2  -9  896.53   19.75
   0   2   9  904.93   19.93
   0   2  10  145.73    4.58
   0   2 -10  141.57    3.60
   0  -2  10  150.81    4.63
   0  -2  10  149.64    4.89
   0   2 -10  145.40    4.37
   0   2  10  139.00    3.71
   0   2  10  145.63    4.36
   0   2 -10  139.82    4.70
   0   2  10  146.95    3.34
   0  -2  11    3.89    1.83
   0   2 -11    1.79    0.84
   0  -2  11    2.35    1.60
   0   2 -11    1.57    1.59
   0   2  11    3.37    0.58
   0   2  11    2.96    0.93
   0   2  11    2.10    1.40
   0   2 -11    1.75    1.42
   0   2  11   -0.81    1.48
   0   2 -12    4.01    1.75
   0   2  12    1.46    1.40
   0   2  12    2.86    0.87
   0   2  12    4.44    0.61
   0  -2  12    6.21    2.05
   0   2 -12    2.43    1.41
   0   2 -12    2.48    0.80
   0  -2  12    2.94    1.66
   0   2  12    3.76    1.61
   0   2  13    4.24    1.50
   0   2  13    4.91    1.78
   0  -2  13    6.20    1.42
   0   2 -13    4.93    1.45
   0   2 -13    4.99    1.75
   0  -2  13    2.27    1.68
   0   2  13    2.98    0.88
   0  -2  14   -0.64    1.81
   0   2  14    1.25    1.60
   0  -2  14    2.63    1.35
   0   3   0    0.11    0.54
   0   3   0    0.10    0.64
   0  -3   0    0.31    0.65
   0  -3   2 2165.78   45.21
   0   3  -2 2139.18   45.21
   0  -3   2 2124.25   45.19
   0   3  -2 2168.25   45.15
   0  -3   3  494.10   11.19
   0   3  -3  508.36   11.07
   0   3   3  501.12   11.14
   0   3  -3  492.68   11.19
   0  -3   3  493.44   11.13
   0  -3   4 1997.34   42.13
   0  -3  -4 1973.96   41.21
   0   3  -4 1994.68   42.11
   0  -3   4 1955.91   42.00
   0   3   4 1992.99   41.92
   0   3  -4 2012.79   41.92
   0   3  -4 2000.86   41.58
   0   3   5  315.64    7.37
   0  -3  -5  306.13    6.70
   0  -3   5  316.39    7.56
   0  -3   5  303.76    7.70
   0   3  -5  311.50    7.69
   0   3  -5  318.49    7.00
   0   3   6    0.99    0.89
   0   3  -6    1.82    1.14
   0   3   6    1.11    0.72
   0   3  -6    1.71    0.66
   0   3   6    1.11    0.82
   0  -3   6    1.77    0.96
   0  -3   6    0.99    1.15
   0   3   7   89.30    2.75
   0   3  -7   81.56    2.28
   0   3   7   80.92    2.59
   0   3   7   84.69    2.60
   0  -3   7   84.37    3.13
   0  -3   7   85.88    2.96
   0   3  -7   79.10    3.06
   0  -3   8   39.78    2.12
   0   3   8   44.24    2.00
   0   3   8   42.67    1.87
   0  -3   8   39.17    2.35
   0   3  -8   43.36    2.08
   0   3  -8   41.37    1.47
   0   3   8   41.79    1.77
   0   3   9   86.32    3.01
   0  -3   9   94.09    3.37
   0   3  -9   86.32    2.45
   0   3   9   88.38    2.75
   0  -3   9   91.42    3.62
   0   3   9   85.97    3.12
   0   3  -9   90.41    3.24
   0  -3  10  173.33    5.33
   0  -3  10  171.25    5.56
   0   3  10  181.27    4.54
   0   3  10  174.61    5.14
   0   3 -10  175.66    5.15
   0   3  10  172.55    4.94
   0   3 -10  172.94    4.23
   0   3  11   70.65    3.04
   0  -3  11   78.31    3.53
   0   3 -11   69.06    2.12
   0   3 -11   68.95    2.93
   0   3 -11   77.86    3.40
   0  -3  11   76.53    3.33
   0   3  11   73.94    2.93
   0   3  11   65.54    2.33
   0   3 -12  321.76    7.52
   0   3 -12  356.79    9.22
   0   3  12  321.37    7.78
   0  -3  12  367.51    9.21
   0  -3  12  360.53    9.47
   0   3  12  350.36    8.68
   0   3  12  349.14    8.90
   0   3 -12  353.38    8.75
   0   3  13   19.35    1.30
   0   3  13   22.48    2.02
   0   3  13   18.20    2.07
   0   3 -13   20.37    2.30
   0  -3  13   23.89    2.33
   0  -3  14  109.16    4.49
   0   3  14  100.41    4.00
   0   3 -14  107.18    4.45
   0  -4   0  142.49    3.71
   0   4   0  142.07    3.71
   0   4   0  141.08    3.57
   0   4  -1 2573.96   55.00
   0   4   1 2626.53   54.82
   0  -4   1 2632.71   55.10
   0   4  -1 2639.42   55.07
   0   4   1 2640.01   55.02
   0   4  -2  260.95    6.19
   0   4   2  251.59    5.86
   0  -4   2  271.22    6.32
   0   4  -2  255.85    6.24
   0   4   2  259.59    6.11
   0   4   3 2976.56   63.37
   0   4  -3 3019.92   63.22
   0   4  -3 3026.99   63.35
   0  -4   3 3050.96   63.36
   0  -4   3 2981.10   63.32
   0   4  -4  579.06   12.77
   0   4  -4  572.94   12.96
   0   4   4  561.28   12.84
   0  -4   4  555.42   12.93
   0  -4   4  570.69   12.88
   0   4   5    7.63    1.21
   0   4  -5    6.11    1.23
   0  -4   5    8.38    1.31
   0  -4   5    8.07    1.22
   0  -4  -5    8.55    0.48
   0   4  -5    8.65    0.94
   0   4  -5    7.25    1.19
   0  -4   6  101.24    3.44
   0   4   6  108.14    2.90
   0  -4   6   96.81    3.28
   0   4  -6   96.67    2.68
   0   4  -6  102.73    3.42
   0  -4  -6   96.71    2.29
   0   4   6  101.11    3.14
   0   4   7  346.96    8.01
   0   4  -7  328.21    8.43
   0  -4   7  330.26    8.33
   0   4  -7  323.84    7.46
   0  -4   7  341.49    8.51
   0   4   7  320.94    7.71
   0   4   7  342.29    7.86
   0  -4   8  236.92    6.63
   0   4   8  232.26    5.90
   0   4  -8  230.37    6.21
   0   4   8  232.48    5.98
   0   4  -8  236.86    6.58
   0   4   8  229.98    5.94
   0  -4   8  240.75    6.47
   0   4  -8  235.30    5.49
   0   4   9  768.10   17.08
   0   4   9  768.84   17.19
   0   4   9  765.10   16.94
   0   4  -9  760.22   16.49
   0  -4   9  787.82   17.90
   0  -4   9  767.75   17.64
   0   4  -9  755.16   17.32
   0   4 -10  154.29    3.96
   0   4  10  157.98    4.36
   0   4  10  160.79    4.64
   0  -4  10  160.89    5.12
   0   4 -10  151.22    4.82
   0  -4  10  164.68    5.38
   0   4  10  164.09    4.76
   0   4  11    3.12    1.37
   0   4 -11    1.08    1.54
   0   4  11    0.23    1.17
   0  -4  11    0.42    1.75
   0   4 -11    0.17    0.87
   0  -4  11   -1.06    1.63
   0   4  11    0.20    1.26
   0   4 -12    9.77    1.83
   0   4  12    9.89    1.63
   0   4 -12   13.08    2.11
   0  -4  12   10.06    1.93
   0   4  12   11.30    1.72
   0   4  12   11.18    1.28
   0   4 -12   10.45    1.01
   0   4 -13  382.04    9.80
   0   4  13  376.92    9.31
   0   4  13  374.02    8.24
   0  -4  13  393.41    9.85
   0   4  13  388.39    9.19
   0   4 -14   33.08    2.88
   0   4  14   40.00    2.50
   0  -4  14   36.03    2.90
   0   5   0    1.50    1.11
   0   5   0    0.85    0.88
   0  -5   0    0.29    0.84
   0   5  -1  731.78   16.33
   0  -5   1  753.33   16.48
   0  -5  -1  749.27   16.04
   0   5  -1  758.53   16.43
   0   5   1  743.86   16.14
   0   5   1  736.91   16.37
   0   5  -2  880.17   19.40
   0   5   2  896.95   19.32
   0  -5   2  909.60   19.53
   0   5  -2  882.03   19.38
   0   5   2  876.40   19.03
   0  -5   3  371.94    8.82
   0   5  -3  373.26    8.67
   0   5  -3  357.27    8.74
   0   5   3  367.66    8.54
   0   5   3  363.41    8.21
   0   5   3  359.68    8.88
   0   5  -4  751.81   17.17
   0   5  -4  776.00   17.04
   0   5   4  770.70   17.22
   0  -5   4  769.77   17.22
   0  -5   5  205.32    5.58
   0  -5  -5  204.71    4.49
   0   5   5  194.59    5.47
   0   5  -5  205.42    5.61
   0  -5   5  201.06    5.58
   0   5  -5  198.55    5.38
   0   5   6  846.21   18.77
   0  -5  -6  838.63   17.66
   0   5  -6  841.94   18.24
   0  -5   6  853.11   19.05
   0  -5   6  842.40   18.96
   0   5  -6  857.27   19.07
   0   5   7   22.58    1.73
   0   5  -7   22.11    1.92
   0   5   7   27.31    1.44
   0   5  -7   26.11    1.35
   0  -5   7   27.03    1.90
   0  -5   7   24.29    1.98
   0   5   8   23.82    1.48
   0  -5   8   24.26    2.08
   0   5   8   24.79    1.56
   0   5  -8   26.59    1.37
   0  -5   8   24.37    2.01
   0   5   8   24.97    1.75
   0   5  -8   24.43    2.16
   0   5  -9    7.44    1.69
   0  -5   9    6.00    1.89
   0   5  -9    7.25    1.07
   0   5   9    3.96    1.33
   0   5   9    3.94    1.27
   0   5   9    5.08    1.27
   0  -5   9    6.06    1.59
   0   5  -9    6.63    1.47
   0  -5  10  845.03   19.43
   0   5  10  829.13   18.66
   0  -5  10  875.30   19.63
   0   5  10  840.13   18.54
   0   5  10  827.52   18.71
   0   5 -10  825.87   18.02
   0   5 -10  827.93   18.97
   0   5  11   38.32    2.19
   0   5  11   37.61    2.19
   0   5 -11   40.08    2.46
   0  -5  11   39.33    2.81
   0   5 -11   39.79    1.64
   0  -5  11   33.94    2.59
   0   5  11   37.26    2.00
   0   5  12  331.46    8.07
   0   5  12  336.88    8.53
   0   5 -12  334.20    7.59
   0   5  12  319.80    8.55
   0  -5  12  336.95    9.26
   0   5  13    7.85    1.71
   0   5  13   10.51    1.38
   0   5 -13   10.99    1.07
   0  -5  13   11.39    2.16
   0   5 -13   12.33    2.22
   0   5  13   10.80    1.74
   0  -5  14  137.11    5.29
   0   5 -14  134.85    5.26
   0   5  14  134.32    4.61
   0  -6   0 3789.97   78.75
   0   6   0 3752.71   79.06
   0   6   0 3745.59   78.87
   0   6  -1  404.61    9.53
   0  -6   1  402.98    9.33
   0  -6  -1  403.83    9.09
   0   6   1  408.60    9.25
   0   6  -1  398.81    9.43
   0   6   1  403.90    9.48
   0   6   2 1865.00   39.33
   0  -6   2 1863.54   39.81
   0   6  -2 1834.13   39.72
   0   6  -2 1866.72   39.72
   0   6   2 1871.87   39.65
   0   6  -3  381.30    9.15
   0   6   3  382.18    9.05
   0   6   3  385.46    8.71
   0  -6   3  379.25    9.33
   0   6  -3  380.17    9.25
   0   6   3  384.01    9.50
   0   6  -4   27.96    1.77
   0   6  -4   26.83    1.64
   0   6   4   28.78    1.65
   0  -6   4   29.42    1.86
   0   6   4   27.67    1.96
   0   6   4   26.85    1.31
   0   6  -5  172.78    5.24
   0   6   5  187.04    4.53
   0   6  -5  171.19    4.95
   0   6   5  168.62    5.16
   0  -6   5  183.83    5.22
   0   6  -6  307.64    8.16
   0  -6   6  313.64    8.15
   0   6   6  321.02    8.08
   0  -6   6  314.07    8.19
   0   6  -6  310.39    7.48
   0  -6  -6  315.18    6.81
   0   6  -6  315.19    7.95
   0  -6   7  221.90    6.27
   0   6  -7  215.54    6.27
   0   6  -7  220.86    5.41
   0   6   7  225.16    5.42
   0   6   7  213.05    5.98
   0  -6  -7  212.73    4.73
   0  -6   7  214.87    6.26
   0  -6   8    3.03    1.62
   0   6   8    3.50    1.47
   0   6   8    2.04    1.05
   0   6  -8    2.03    1.01
   0   6  -8    3.06    1.62
   0  -6   8    2.34    1.55
   0  -6   9  134.17    4.82
   0   6  -9  146.12    4.96
   0   6   9  132.19    4.28
   0  -6   9  141.74    4.94
   0   6   9  139.10    4.06
   0   6   9  139.65    4.08
   0   6  -9  133.60    4.53
   0   6  -9  138.00    3.72
   0   6  10  256.41    6.53
   0   6 -10  243.76    6.88
   0   6 -10  237.14    7.25
   0  -6  10  250.65    7.30
   0   6  10  242.66    6.47
   0  -6  10  241.50    7.27
   0   6 -10  240.87    5.92
   0   6  10  251.68    6.54
   0   6  11    3.74    1.42
   0   6 -11    3.63    1.05
   0  -6  11    5.40    1.91
   0   6 -11    3.28    1.92
   0   6  11    4.47    1.45
   0   6 -11    3.26    1.73
   0   6  11    4.22    1.38
   0   6 -12  239.97    5.76
   0  -6  12  245.76    7.44
   0   6  12  243.75    6.62
   0   6  12  228.74    6.51
   0   6  12  233.56    6.27
   0  -6  13   62.68    3.68
   0   6 -13   67.63    2.22
   0   6  13   72.01    3.10
   0   7   0    0.36    1.01
   0   7   0    0.06    1.18
   0  -7   0    0.66    0.90
   0   7   1   57.28    2.17
   0   7  -1   58.67    2.34
   0  -7   1   55.72    2.24
   0   7  -1   57.79    2.48
   0  -7  -1   58.96    2.04
   0   7   1   64.14    2.46
   0  -7   2 3294.11   68.52
   0   7   2 3267.14   68.24
   0   7   2 3256.01   68.57
   0  -7   2 3178.81   68.81
   0   7  -2 3298.18   68.65
   0   7  -2 3190.93   68.63
   0  -7   3  131.95    4.16
   0   7  -3  140.56    4.23
   0   7   3  139.95    3.79
   0   7   3  137.35    4.62
   0  -7   3  138.37    4.36
   0   7   3  139.36    4.12
   0   7  -3  140.51    4.27
   0   7  -4    1.10    1.23
   0  -7   4    2.09    1.42
   0   7  -4    1.91    1.13
   0   7   4    0.46    0.83
   0   7   4    0.51    1.47
   0   7  -5    7.12    1.36
   0  -7   5    8.82    1.61
   0   7   5    7.71    1.73
   0   7   5    5.35    1.33
   0   7   5    5.80    1.02
   0   7  -5    6.81    1.58
   0   7  -6    5.69    1.59
   0   7   6    6.22    1.70
   0  -7  -6    4.96    0.65
   0   7   6    5.73    1.07
   0   7  -6    3.92    1.38
   0   7  -6    5.26    1.24
   0  -7   6    4.76    1.48
   0  -7  -7   96.69    2.34
   0  -7   7   96.90    3.85
   0   7  -7   93.71    3.07
   0   7  -7   97.79    3.90
   0   7   7   97.05    3.70
   0   7   8   67.81    2.38
   0  -7   8   58.04    3.15
   0   7  -8   69.42    3.32
   0   7   8   66.82    3.00
   0  -7  -8   62.45    1.63
   0   7  -8   66.33    2.37
   0  -7   8   65.68    3.18
   0  -7   9  117.86    4.48
   0  -7   9  112.50    4.46
   0   7   9  110.97    3.50
   0   7   9  116.23    4.01
   0   7  -9  113.71    3.33
   0   7  -9  101.32    4.32
   0   7   9  114.57    3.55
   0  -7  10   -0.22    1.74
   0   7 -10   -3.16    1.84
   0   7  10   -1.74    1.24
   0   7 -10    2.71    1.55
   0   7  10    0.97    1.51
   0   7  10    1.31    1.24
   0   7 -10    0.65    1.09
   0  -7  11    3.81    1.92
   0   7  11    4.23    1.40
   0   7  11    3.93    1.55
   0   7 -11    5.42    1.17
   0   7 -11    4.18    2.17
   0   7  12   22.46    1.94
   0   7 -12   26.45    2.72
   0  -7  12   22.48    2.57
   0   7  12   22.33    1.89
   0   7  13   31.48    2.26
   0  -7  13   36.25    3.04
   0   8   0  153.47    4.66
   0  -8   0  156.74    4.31
   0   8   0  157.63    4.49
   0   8  -1 1019.29   22.55
   0   8   1  984.27   22.17
   0   8   1 1024.60   22.51
   0  -8   1 1013.69   22.24
   0  -8  -1 1035.53   22.00
   0   8  -1 1011.81   22.42
   0   8  -2 1284.81   27.57
   0   8  -2 1265.31   27.55
   0   8   2 1230.81   27.46
   0   8   2 1243.69   27.12
   0  -8   2 1260.97   27.37
   0   8  -3   28.85    1.91
   0  -8   3   34.19    2.05
   0   8   3   32.65    2.01
   0   8   3   36.33    1.75
   0   8  -3   34.99    2.18
   0  -8   3   31.27    2.14
   0   8   3   30.99    2.46
   0   8  -4   46.36    2.43
   0   8   4   46.68    2.39
   0   8  -4   45.61    2.55
   0  -8   4   48.91    2.65
   0   8   4   53.46    2.08
   0   8   4   51.18    2.95
   0  -8   4   48.42    2.49
   0  -8   5   15.43    1.86
   0  -8   5   14.78    1.92
   0   8   5   13.23    2.06
   0   8  -5   18.49    1.96
   0   8   5   15.73    1.33
   0   8   5   19.81    1.79
   0   8  -5   17.77    1.79
   0   8   6  223.39    5.77
   0  -8   6  214.19    6.66
   0   8   6  241.84    6.84
   0   8  -6  231.22    6.70
   0   8  -6  228.04    6.37
   0   8   6  227.09    6.28
   0  -8   7   97.20    4.00
   0  -8  -7   92.94    2.38
   0   8   7  105.68    4.02
   0   8  -7  101.78    3.97
   0   8  -7   91.26    3.62
   0   8  -7   97.66    3.24
   0   8   7   96.72    3.53
   0   8   7   94.30    3.05
   0  -8  -8    3.93    0.58
   0   8  -8    4.87    1.84
   0  -8   8    3.93    1.71
   0   8   8    3.59    1.16
   0   8   8    3.74    1.80
   0   8  -8    2.84    1.20
   0   8   8    2.80    1.08
   0   8  -9  227.97    6.94
   0   8   9  221.10    6.47
   0  -8   9  227.74    6.94
   0   8   9  214.51    5.69
   0   8  -9  216.35    5.62
   0   8  10   57.52    2.48
   0   8  10   61.96    3.02
   0   8  10   56.92    2.49
   0   8 -10   61.06    2.34
   0   8 -10   59.02    3.37
   0  -8  10   62.96    3.44
   0   8 -11   70.26    3.78
   0   8  11   66.80    2.80
   0   8 -11   61.50    2.41
   0  -8  11   63.52    3.64
   0   8  11   66.72    3.01
   0   8 -12   32.96    2.95
   0   8  12   30.78    2.06
   0   8  12   27.88    2.13
   0   8 -12   29.38    1.73
   0  -8  12   26.68    2.74
   0  -9   0    0.23    1.41
   0   9   0    0.68    1.47
   0   9   0    0.26    1.20
   0  -9   0    0.05    1.08
   0   9   1  849.08   19.06
   0   9  -1  822.78   18.93
   0  -9   1  840.26   18.74
   0   9   1  833.10   18.75
   0  -9  -1  838.31   18.46
   0   9  -1  861.10   19.16
   0   9  -2  109.81    3.79
   0  -9   2   99.84    3.55
   0   9   2  113.15    3.87
   0   9  -2  107.68    3.86
   0   9   2  103.43    3.40
   0   9  -3   29.61    2.16
   0  -9   3   33.03    2.13
   0   9   3   29.78    1.79
   0   9   3   30.63    2.12
   0   9   3   35.78    2.83
   0   9  -3   34.83    2.25
   0   9  -4    2.91    1.56
   0   9   4    4.08    1.54
   0   9   4    4.77    2.09
   0  -9   4    5.62    1.54
   0   9   4    4.77    1.22
   0   9  -4    3.17    1.54
   0  -9   4    5.51    1.82
   0   9   5  133.49    4.92
   0   9   5  130.30    3.85
   0   9   5  130.41    4.32
   0   9  -5  132.23    4.43
   0   9  -5  130.67    4.56
   0  -9   5  118.52    4.38
   0  -9   5  122.25    4.58
   0   9   6    0.27    1.11
   0   9   6   -0.96    1.51
   0  -9   6    1.11    1.65
   0   9  -6    0.17    1.56
   0   9  -6    1.40    1.66
   0  -9   6    0.21    1.82
   0   9   6   -2.08    1.99
   0   9  -7   17.55    2.06
   0  -9   7   16.55    2.22
   0   9   7   14.72    2.27
   0   9  -7   16.04    1.69
   0   9  -7   16.08    2.15
   0  -9  -7   14.61    0.93
   0   9   7   13.36    1.81
   0  -9   7   13.60    1.99
   0   9   7   15.17    1.45
   0  -9  -8   19.75    0.91
   0   9  -8   21.11    1.73
   0   9   8   21.53    1.46
   0   9   8   18.70    2.00
   0   9  -8   27.28    2.46
   0   9   8   23.84    1.64
   0   9   8   22.90    2.37
   0  -9   8   19.93    2.30
   0  -9   9  102.76    4.55
   0   9   9  112.39    3.47
   0   9   9  108.99    3.51
   0   9   9  119.10    4.41
   0   9  -9  117.89    4.74
   0   9   9  115.65    4.13
   0   9  -9  107.54    3.52
   0   9  10  137.08    4.71
   0  -9  10  130.17    5.19
   0   9  10  132.85    4.53
   0   9  10  122.86    3.96
   0   9  10  128.51    3.97
   0   9 -10  127.07    3.85
   0   9 -10  130.65    5.18
   0   9  11  179.19    5.52
   0   9 -11  167.36    6.12
   0   9 -11  174.45    4.72
   0   9  11  172.02    4.90
   0  -9  11  166.56    6.17
   0   9  11  167.21    5.02
   0  10   0 3757.39   78.03
   0  10   0 3644.46   77.74
   0 -10   0 3650.43   77.40
   0 -10   1  922.00   20.36
   0  10  -1  929.80   20.81
   0  10   1  917.86   20.74
   0  10  -1  907.40   20.63
   0 -10  -1  925.05   20.08
   0  10   1  868.86   20.35
   0  10   2  606.81   14.53
   0  10  -2  613.91   14.59
   0 -10   2  622.74   14.32
   0  10   2  639.23   15.50
   0  10   2  594.42   14.09
   0  10  -2  618.32   14.55
   0 -10   3  927.10   21.07
   0  10  -3  934.62   21.27
   0  10   3  938.76   21.22
   0  10   3  903.67   20.67
   0  10  -3  942.99   21.32
   0  10   3  992.17   22.19
   0  10   4  193.46    5.36
   0  10   4  197.47    5.84
   0  10   4  212.64    6.75
   0 -10   4  188.71    5.80
   0  10  -4  194.25    5.91
   0  10  -4  188.89    6.01
   0 -10   5    0.33    1.80
   0  10   5    1.03    1.55
   0  10   5   -0.74    2.08
   0 -10   5   -0.09    1.61
   0  10  -5   -0.31    1.74
   0  10  -5    1.80    1.63
   0  10   5   -0.64    1.15
   0 -10   6   72.11    3.42
   0  10   6   69.38    2.70
   0  10   6   72.88    3.25
   0 -10   6   68.51    3.63
   0  10  -6   69.38    3.54
   0  10  -6   72.59    3.33
   0  10   6   80.64    4.05
   0  10   7   77.71    3.83
   0  10   7   72.33    3.25
   0  10   7   65.53    2.68
   0  10  -7   70.62    2.98
   0 -10  -7   68.57    2.03
   0  10  -7   68.84    3.62
   0 -10   7   65.99    3.44
   0 -10   7   75.64    3.64
   0  10   8   68.15    2.67
   0  10  -8   71.07    2.90
   0  10  -8   67.47    3.61
   0  10   8   73.20    3.71
   0  10   8   69.83    3.24
   0 -10  -8   66.41    1.88
   0 -10   8   73.08    3.79
   0  10   9   31.85    1.96
   0  10   9   38.01    2.87
   0 -10   9   33.27    2.84
   0  10  -9   37.87    2.10
   0  10  -9   31.54    2.76
   0 -10  -9   30.12    1.04
   0  10  10   67.57    3.48
   0  10  10   63.95    3.18
   0  10 -10   62.99    3.61
   0  10 -10   59.56    2.58
   0 -10  10   65.85    3.83
   0 -11   0    0.25    1.30
   0  11   0    0.08    1.40
   0  11   0    1.29    1.63
   0  11   1  100.05    3.65
   0 -11   1   99.33    4.10
   0  11  -1  105.53    4.03
   0  11   1  102.28    3.95
   0  11  -1   99.11    3.83
   0 -11   1  100.47    3.57
   0  11   2    2.46    2.32
   0  11  -2    0.18    1.53
   0 -11   2    0.61    1.41
   0  11  -2   -1.11    1.58
   0  11   2    1.64    1.69
   0  11   2    0.93    1.30
   0 -11   3  141.02    4.71
   0  11   3  153.18    5.83
   0  11  -3  145.31    4.94
   0  11   3  139.70    4.43
   0  11  -3  151.41    5.07
   0  11   3  144.88    4.90
   0  11  -4   37.35    2.70
   0  11  -4   34.95    2.57
   0  11   4   39.89    3.38
   0  11   4   37.24    2.10
   0  11   4   37.81    2.56
   0 -11   4   40.53    2.53
   0 -11   5   16.20    2.39
   0 -11   5   16.77    2.03
   0  11   5   14.81    1.58
   0  11   5   18.11    2.82
   0  11  -5   12.05    2.09
   0  11   5   14.03    1.95
   0  11   6  106.95    4.15
   0  11  -6  111.07    4.58
   0  11   6  108.42    3.64
   0 -11   6  111.67    4.77
   0 -11   7   80.73    4.08
   0  11  -7   81.74    3.92
   0  11  -7   85.63    3.41
   0  11   7   80.21    3.02
   0 -11  -7   84.42    2.40
   0  11   7   82.05    3.68
   0  11   7   95.43    4.51
   0  11   8   73.06    2.86
   0  11   8   77.19    3.49
   0  11  -8   80.09    3.96
   0 -11   8   74.68    3.91
   0  11   8   80.93    4.12
   0  11  -8   76.21    3.16
   0 -11  -8   75.28    2.10
   0  11  -9   -1.97    2.16
   0 -11   9   -0.68    2.13
   0  11   9   -2.14    2.12
   0  11  -9   -0.47    1.56
   0 -11  -9    0.50    0.61
   0  12   0   17.99    2.16
   0 -12   0   17.36    1.71
   0  12   0   15.71    1.87
   0  12  -1   77.00    3.36
   0  12   1   73.85    4.32
   0  12   1   71.81    3.18
   0  12   1   74.17    3.43
   0  12  -1   78.27    3.46
   0 -12   1   63.76    2.95
   0 -12   2   57.15    3.39
   0 -12   2   52.96    2.75
   0  12   2   61.01    3.96
   0  12  -2   50.05    2.93
   0  12   2   54.10    3.00
   0  12  -2   56.09    3.07
   0  12   2   49.76    2.63
   0  12   3   18.38    2.16
   0 -12   3   18.10    2.00
   0  12  -3   19.90    2.23
   0  12   3   21.47    3.11
   0  12   3   18.84    1.78
   0 -12   4    3.83    1.73
   0  12  -4    5.49    1.91
   0  12   4    6.05    1.41
   0  12   4    5.76    1.86
   0  12   4    5.18    2.58
   0  12   5    5.54    1.37
   0  12   5    7.43    1.95
   0  12  -5   10.19    2.09
   0  12   5    7.17    2.78
   0 -12   6    5.63    2.18
   0  12   6    4.14    2.53
   0  12   6    5.79    1.42
   0  12   6    5.03    1.80
   0  12  -6    5.09    2.02
   0  12  -7    1.53    2.04
   0  12   7    0.60    2.46
   0  12   7    0.91    1.25
   0 -12   7   -0.41    2.02
   0 -12  -7    0.41    0.87
   0  12  -8    1.06    2.03
   0  12   8    3.93    2.48
   0 -12  -8    2.17    0.79
   0 -12   8    2.37    2.21
   0  13   0   -0.38    1.56
   0  13   1  111.92    4.07
   0 -13   1  104.44    3.83
   0  13  -1  107.42    4.23
   0  13   1  115.17    5.36
   0  13   2   55.63    4.12
   0 -13   2   56.79    3.35
   0 -13   2   55.44    2.82
   0  13   2   50.85    2.76
   0  13  -2   53.55    3.07
   0  13  -3  378.71   10.17
   0 -13   3  374.43   10.48
   0  13   3  366.21    9.52
   0  13   4  444.38   12.40
   0  13   4  415.26   10.44
   0  13  -4  421.26   11.23
   0  13  -5    3.16    1.94
   0  13   5    1.24    1.39
   0  13   5    6.52    2.85
   0  13   6    0.50    2.72
   0  13  -6    5.62    2.21
   0  14   0    3.38    1.79
   0  14  -1    3.03    1.77
   0 -14   1    3.97    1.63
   0  14   1    7.75    1.84
   0  14  -1    4.53    2.74
   0  14   1    4.80    2.81
   0  14   2   15.10    3.18
   0  14   2    9.80    1.80
   0  14  -2    6.44    2.88
   0  14  -2   12.52    2.13
   0  14   3    4.04    2.87
   0  14  -3    2.76    2.57
   0  14  -3    1.97    1.99
   0  14   3    1.10    1.64
   0 -14   3    1.45    2.07
   0  14  -4  399.25   10.82
   0 -14   4  392.60   11.12
  -1   0  15    0.88    1.71
  -1   0  14   -0.09    1.53
  -1   0  13    0.93    1.45
  -1   0  13    1.82    1.75
  -1   0  13   -0.12    0.87
   1   0 -12   34.15    2.22
  -1   0  12   31.47    2.46
  -1   0  12   36.87    2.21
  -1   0  12   35.19    1.53
  -1   0  11    1.45    1.54
   1   0 -11    0.29    1.41
  -1   0  11    0.28    1.26
  -1   0  11    1.08    0.93
  -1   0  10   -0.06    1.20
  -1   0  10   -0.15    1.34
   1   0 -10    0.93    1.34
   1   0 -10    1.17    1.01
  -1   0  10   -0.39    0.92
  -1   0   9    1.06    1.11
  -1   0   9    0.27    0.44
   1   0  -9    0.18    1.12
  -1   0   9    0.90    1.23
  -1   0   9    1.24    0.87
  -1   0   8  370.66    8.86
  -1   0   8  357.82    7.72
   1   0  -8  358.01    8.68
  -1   0   8  363.82    8.56
   1   0  -8  376.02    8.41
  -1   0   8  358.62    8.18
  -1   0   7    0.25    0.76
  -1   0   7    0.15    0.37
   1   0  -7   -0.53    0.76
  -1   0   7    0.33    0.82
   1   0  -7    0.64    0.91
  -1   0   7    0.58    0.98
  -1   0   6 1615.64   33.55
   1   0  -6 1535.88   34.29
   1   0  -6 1650.12   34.09
  -1   0   6 1609.71   33.94
  -1   0   6 1625.51   34.40
  -1   0   6 1623.44   34.18
  -1   0   5    0.44    0.74
  -1   0   5    0.70    0.73
   1   0  -5   -0.57    0.72
  -1   0   5    0.37    0.35
  -1   0   5    0.48    0.93
  -1   0   4  343.96    7.59
  -1   0   4  351.94    7.66
  -1   0   4  344.33    7.82
  -1   0   3    0.78    0.51
  -1   0   3    0.19    0.39
  -1   0   3    0.28    0.56
   1   0  -1   -0.07    0.23
   1   0  -1    0.09    0.24
   1   0   1    0.23    0.35
  -1   0  -1   -0.18    0.36
  -1   0  -1    0.65    0.28
   1   0   2   13.68    0.74
   1   0   2   14.44    0.75
  -1   0  -2   16.50    0.77
   1   0   2   14.67    0.81
   1   0   3   -0.26    0.52
  -1   0  -3   -0.25    0.59
  -1   0  -3    0.71    0.53
   1   0   3   -0.67    0.67
   1   0   3   -0.10    0.55
   1   0   4  767.92   16.63
  -1   0  -4  799.21   16.57
  -1   0  -4  796.31   16.45
   1   0   4  770.49   16.53
   1   0   5    0.22    1.16
   1   0   5   -0.18    0.98
   1   0   5    0.48    0.76
  -1   0  -5    0.28    0.82
   1   0   6 2760.80   59.07
  -1   0  -6 2825.56   59.18
   1   0   6 2896.22   59.52
   1   0   6 2900.42   59.70
   1   0   7    0.30    1.15
  -1   0  -7   -0.96    0.81
   1   0   7   -0.59    0.74
   1   0   7   -0.87    0.98
   1   0   8 1154.73   25.21
  -1   0  -8 1201.86   25.41
  -1   0  -8 1196.22   25.58
   1   0   8 1221.79   26.12
   1   0   8 1193.10   25.89
   1   0   9   -0.46    1.43
   1   0   9    0.26    1.26
   1   0   9   -0.03    0.85
  -1   0  -9   -0.60    1.01
  -1   0 -10  783.50   17.00
   1   0  10  753.10   16.72
   1   0  10  787.24   17.67
   1   0  10  798.60   17.96
   1   0  11    1.02    1.60
   1   0  11    0.81    0.91
   1   0  11    1.92    1.50
  -1   0 -11    0.79    1.14
   1   0  11    0.29    0.87
   1   0  12    6.75    1.73
  -1   0 -12    5.61    1.26
   1   0  12    6.84    1.62
   1   0  12    6.52    0.90
   1   0  12    6.42    1.02
   1   0  13   -1.23    1.65
   1   0  13    0.20    0.94
   1   0  13    0.02    0.74
   1   0  14  377.94    9.99
  -1   1  15   49.52    2.84
  -1  -1  15   51.67    2.99
  -1  -1  14   74.71    3.42
  -1   1  14   80.06    3.31
  -1  -1  14   69.24    2.40
  -1  -1  13   22.20    2.30
  -1   1  13   19.27    1.11
   1   1 -13   18.63    2.08
  -1  -1  13   21.07    1.47
  -1   1  13   18.10    2.13
  -1   1  13   21.80    1.91
  -1  -1  13   24.04    2.10
  -1   1  12  102.33    3.65
  -1  -1  12  108.80    3.18
  -1  -1  12  102.44    3.82
  -1   1  12  101.62    2.74
  -1   1  12   96.65    3.89
   1   1 -12  106.36    3.47
   1   1 -12  105.75    3.92
  -1  -1  12  102.35    4.06
  -1  -1  11  152.20    4.99
  -1   1  11  156.97    4.60
  -1   1  11  152.21    4.83
  -1   1  11  141.84    3.43
   1   1 -11  157.61    4.40
  -1   1  11  152.32    3.70
  -1  -1  11  156.20    4.13
   1   1 -11  151.44    4.79
  -1  -1  11  155.29    4.73
   1   1 -10   72.27    3.09
  -1  -1  10   80.02    3.01
  -1   1  10   73.37    1.96
   1   1 -10   74.02    2.77
  -1   1  10   78.72    2.19
  -1  -1  10   73.60    3.20
  -1   1  10   78.34    3.10
  -1   1  10   77.57    2.84
  -1  -1  10   75.23    2.56
  -1  -1   9  207.90    5.43
  -1  -1   9  227.93    5.87
   1   1  -9  227.75    6.10
  -1   1   9  213.17    4.91
  -1   1   9  228.27    5.74
  -1   1   9  220.82    5.96
   1  -1  -9  223.82    5.74
   1   1  -9  219.01    5.65
  -1   1   9  221.04    5.10
  -1  -1   9  225.56    6.15
  -1   1   8  280.62    6.25
   1   1  -8  282.77    7.11
  -1  -1   8  290.72    6.94
  -1   1   8  269.75    6.11
  -1  -1   8  272.39    7.15
   1  -1  -8  273.73    6.78
  -1   1   8  290.36    7.05
   1   1  -8  276.07    6.74
   1  -1  -7 1004.13   21.44
  -1   1   7 1011.44   20.93
  -1  -1   7 1038.68   21.81
  -1  -1   7 1025.44   21.52
   1   1  -7  939.41   20.67
  -1   1   7 1012.06   21.37
  -1   1   7 1004.74   20.84
  -1   1   7 1048.05   21.62
   1   1  -7  992.96   21.38
  -1   1   6    7.11    0.66
  -1   1   6    8.40    0.72
  -1   1   6    7.08    1.08
   1  -1  -6    5.67    0.97
  -1  -1   6    6.36    1.25
  -1  -1   6    8.21    1.05
  -1   1   6    8.56    0.94
   1   1  -6    6.56    1.00
  -1   1   5 4854.46  102.01
  -1  -1   5 4881.94  102.40
  -1   1   5 4837.23  102.01
  -1   1   5 5048.36  102.26
  -1   1   5 5003.45  102.42
  -1  -1   5 4980.65  102.64
   1  -1  -5 4940.90  102.34
  -1   1   4 4215.90   89.30
  -1   1   4 4582.79   89.42
  -1   1   4 4259.21   89.23
  -1  -1   4 4228.34   89.55
  -1  -1   4 4257.82   89.74
  -1   1   4 4276.07   89.51
   1   1  -3 5077.90  108.99
  -1  -1   3 5126.05  108.99
  -1   1   3 5489.46  108.69
  -1  -1   3 5058.32  108.85
  -1   1   3 5118.64  108.76
  -1   1   3 5308.40  108.61
  -1   1   2  430.47    9.13
  -1  -1   2  425.48    9.30
  -1  -1   2  424.59    9.38
  -1   1   2  438.31    9.12
   1   1  -2  432.07    9.40
  -1  -1   1  719.49   15.41
   1  -1  -1  737.86   15.25
   1   1  -1  726.73   15.37
   1   1  -1  728.35   15.42
  -1  -1   1  711.01   15.37
  -1  -1   1  723.76   15.33
   1   1  -1  743.98   15.32
   1   1   0   12.71    0.61
   1  -1   0   13.61    0.50
   1   1   0   12.89    0.58
   1  -1   0   13.62    0.47
  -1   1   0   13.95    0.48
  -1   1   0   15.56    0.59
   1  -1   0   13.66    0.59
   1   1   1 1407.20   30.52
  -1  -1  -1 1439.37   30.55
   1  -1   1 1465.61   30.47
   1  -1   1 1374.33   30.51
   1  -1   1 1429.48   30.48
  -1   1  -1 1403.47   30.49
  -1   1  -1 1496.57   30.48
   1   1   2  202.87    4.90
   1  -1   2  217.81    4.81
  -1   1  -2  217.97    4.99
   1  -1   2  222.99    4.98
   1  -1   2  210.51    5.00
  -1  -1  -2  203.20    4.92
   1   1   3   34.30    1.17
   1  -1   3   32.94    1.30
   1  -1   3   36.04    1.15
  -1   1  -3   36.41    1.43
   1  -1   3   34.24    1.39
   1   1   3   32.51    1.22
   1   1   4   48.73    1.67
  -1   1  -4   47.55    1.50
   1  -1   4   49.66    1.89
   1  -1   4   45.18    1.46
  -1   1  -4   52.70    1.85
  -1   1  -4   49.56    1.71
   1   1   4   52.40    1.74
   1   1   4   48.13    1.58
   1   1   5  551.35   12.12
   1  -1   5  550.00   12.23
  -1  -1  -5  540.47   12.03
  -1   1  -5  584.02   12.36
   1  -1   5  537.40   12.36
  -1   1  -5  548.52   11.86
   1   1   5  532.86   11.91
   1   1   5  565.59   12.24
   1  -1   5  533.50   11.79
  -1  -1  -6  108.89    3.12
  -1   1  -6  113.31    2.94
   1  -1   6  112.32    3.51
  -1   1  -6  113.72    3.43
   1  -1   6  110.04    2.87
   1   1   6  110.81    3.24
   1   1   6  109.11    2.97
   1  -1   6  115.66    3.38
   1   1   6  111.38    3.37
  -1   1  -7    5.10    0.83
   1  -1   7    2.70    0.73
   1  -1   7    5.66    1.11
   1   1   7    3.73    1.02
   1   1   7    3.44    1.09
   1  -1   7    5.38    1.19
   1   1   7    5.71    0.82
  -1  -1  -7    3.40    0.94
  -1  -1  -8   13.04    1.23
   1   1   8   12.09    0.76
   1  -1   8   12.13    1.45
   1  -1   8   12.34    0.97
   1   1   8   13.52    1.47
   1   1   8   12.36    1.36
   1   1   8   12.29    1.06
  -1   1  -8   12.48    1.05
  -1   1  -8   12.39    1.36
   1  -1   8   13.24    1.53
  -1  -1  -9  601.91   13.33
   1   1   9  598.08   12.67
   1  -1   9  597.09   12.99
   1  -1   9  563.73   13.97
   1   1   9  567.74   12.99
  -1   1  -9  598.11   13.52
   1  -1   9  595.06   13.81
   1   1   9  590.59   13.65
   1   1   9  600.73   13.89
  -1   1  -9  607.45   13.11
   1   1  10  329.04    8.58
  -1  -1 -10  329.59    7.91
   1   1  10  326.20    8.33
   1   1  10  320.83    7.57
   1  -1  10  328.11    8.73
  -1   1 -10  328.96    8.09
   1   1  10  329.53    7.21
   1  -1  10  329.03    7.57
  -1   1 -10  344.13    8.54
   1  -1  10  330.01    8.49
  -1   1 -10  328.05    7.70
   1  -1  11  314.01    7.22
   1  -1  11  323.31    8.27
   1  -1  11  327.55    8.55
   1   1  11  309.20    8.33
   1   1  11  301.55    7.16
   1   1  11  304.87    6.77
  -1  -1 -11  311.33    7.56
  -1   1 -11  317.04    7.80
  -1   1 -11  301.99    7.32
   1  -1  12   12.35    1.85
   1  -1  12   12.59    1.26
   1   1  12   13.25    0.75
   1   1  12   11.65    1.15
   1  -1  12   12.90    2.09
   1   1  12   13.96    1.80
  -1   1 -12   15.24    1.37
   1   1  12   12.85    1.91
   1   1  13  321.57    8.38
   1  -1  13  302.77    7.15
   1  -1  13  307.74    8.42
  -1   1 -13  325.43    7.36
   1  -1  14   26.03    2.50
   1   1  14   31.48    2.46
  -1   2  14  105.09    4.24
  -1   2  14  107.30    3.94
   1   2 -14  111.00    4.34
  -1  -2  14  104.88    3.40
  -1  -2  14  112.73    4.32
   1   2 -13  277.54    7.27
  -1   2  13  288.82    7.47
   1   2 -13  277.69    7.83
  -1   2  13  271.01    6.21
  -1   2  13  277.54    7.73
  -1  -2  13  283.55    6.99
  -1  -2  13  284.26    7.80
  -1  -2  12    7.97    1.87
  -1   2  12   11.88    1.72
  -1  -2  12    9.59    1.45
   1   2 -12    7.40    1.88
   1   2 -12    8.99    1.57
  -1   2  12   10.95    0.86
  -1   2  12   10.04    1.54
  -1  -2  12   11.62    1.76
  -1   2  12   10.39    0.82
  -1   2  11  299.41    6.53
  -1   2  11  310.30    7.53
   1   2 -11  291.95    7.93
  -1   2  11  297.55    7.76
  -1  -2  11  297.85    7.80
  -1   2  11  272.03    6.50
  -1  -2  11  306.25    8.16
  -1  -2  11  293.24    7.24
   1   2 -10  195.91    5.86
  -1   2  10  188.02    4.60
  -1  -2  10  201.10    5.95
  -1   2  10  206.49    5.64
   1   2 -10  192.06    5.38
  -1   2  10  198.27    4.56
  -1   2  10  205.02    5.39
  -1  -2  10  205.76    5.69
  -1  -2   9   19.45    1.94
  -1   2   9   21.06    0.94
   1   2  -9   17.39    0.69
   1   2  -9   23.29    1.92
  -1   2   9   23.00    1.67
  -1  -2   9   20.57    1.66
   1   2  -9   21.81    1.58
  -1   2   9   21.81    1.07
  -1   2   9   22.14    1.47
  -1   2   8    2.91    0.59
   1   2  -8    3.12    1.09
  -1  -2   8    2.15    1.04
  -1   2   8    2.92    1.02
  -1  -2   8    3.12    1.25
  -1   2   8    2.78    0.88
  -1   2   8    2.98    0.72
   1   2  -8    2.41    0.46
   1   2  -7  283.93    6.26
   1   2  -7  282.39    6.97
  -1   2   7  296.03    6.84
  -1   2   7  285.11    6.58
  -1  -2   7  287.40    7.38
  -1   2   7  302.88    7.03
  -1  -2   7  291.99    7.15
  -1   2   7  298.88    6.37
   1   2  -6 3931.60   83.31
  -1  -2   6 3975.21   84.08
  -1  -2   6 3998.80   84.33
  -1   2   6 4054.21   83.68
  -1   2   6 4064.75   83.39
  -1   2   6 4036.82   83.90
  -1   2   6 4226.12   83.80
   1   2  -6 3896.29   83.96
   1  -2  -5   41.06    1.38
   1   2  -5   46.17    1.21
  -1   2   5   39.94    1.61
  -1   2   5   45.78    1.54
  -1   2   5   42.71    1.60
  -1  -2   5   40.36    1.93
  -1   2   5   44.93    1.26
  -1  -2   5   41.40    1.79
  -1   2   4  569.62   12.75
  -1   2   4  594.48   12.56
   1  -2  -4  555.62   12.45
   1   2  -4  579.28   13.07
  -1  -2   4  583.99   13.08
  -1   2   4  592.99   12.65
  -1  -2   4  564.79   12.90
  -1  -2   3 1968.16   41.70
  -1   2   3 2011.87   41.36
  -1  -2   3 1948.77   41.78
   1   2  -3 1970.12   41.81
   1   2  -2   40.46    1.41
  -1  -2   2   38.54    1.44
  -1  -2   2   41.24    1.42
   1   2  -2   42.59    1.49
   1   2  -1   14.17    0.85
  -1  -2   1   15.91    0.87
   1   2  -1   13.74    0.88
  -1  -2   1   14.96    0.87
  -1   2   1   13.40    0.67
   1   2  -1   12.82    0.86
  -1   2   0 1334.95   28.42
   1   2   0 1371.09   28.67
  -1  -2   0 1358.74   28.69
  -1   2   0 1382.94   28.49
  -1  -2   0 1394.81   28.54
   1   2   0 1355.21   28.57
   1   2   0 1365.45   28.61
   1  -2   0 1332.65   28.50
  -1   2  -1   42.39    1.35
  -1   2  -1   43.45    1.35
   1  -2   1   42.86    1.35
   1   2   1   41.53    1.50
   1  -2   1   39.67    1.35
  -1  -2  -1   38.67    1.55
  -1   2  -2  211.71    5.10
   1  -2   2  216.01    5.06
  -1  -2  -2  219.08    5.17
  -1   2  -2  230.05    5.07
   1  -2   2  214.31    5.11
   1   2   2  212.31    5.09
   1  -2   3    8.67    0.74
   1   2   3    7.70    0.83
   1  -2   3    5.92    0.87
  -1   2  -3    8.73    0.91
   1  -2   3    8.40    0.78
   1  -2   4   26.53    1.43
   1  -2   4   31.25    1.54
  -1   2  -4   30.10    1.42
   1   2   4   26.48    1.36
   1  -2   4   24.53    1.17
  -1   2  -4   30.06    1.58
  -1   2  -4   26.27    1.15
  -1   2  -5   74.54    2.24
   1  -2   5   80.08    2.66
  -1  -2  -5   77.26    2.60
  -1   2  -5   79.03    2.58
   1  -2   5   80.63    2.30
   1   2   5   76.82    2.44
  -1   2  -5   83.66    2.80
   1  -2   5   83.05    2.81
   1   2   5   81.48    2.39
   1   2   5   81.62    2.52
   1  -2   6  161.85    4.53
   1  -2   6  167.97    4.70
  -1  -2  -6  160.34    4.41
   1  -2   6  164.93    4.09
  -1   2  -6  169.34    4.08
  -1   2  -6  177.03    4.72
   1   2   6  159.94    4.22
   1   2   6  164.39    4.32
   1   2   6  172.37    4.45
   1  -2   7  160.18    4.51
   1   2   7  161.82    4.11
  -1   2  -7  162.01    3.96
  -1   2  -7  164.96    4.66
   1   2   7  153.68    4.26
   1  -2   7  155.01    4.71
  -1  -2  -7  153.50    4.28
   1  -2   7  152.74    3.96
   1   2   7  160.95    4.44
   1   2   8    2.05    1.12
  -1   2  -8    3.53    0.87
   1   2   8    2.42    1.21
   1   2   8    3.46    0.31
   1  -2   8    2.28    1.33
   1  -2   8    2.68    1.19
   1  -2   8    2.83    0.84
  -1  -2  -8    3.37    1.15
   1   2   8    1.74    0.91
  -1   2  -9  988.16   21.59
   1  -2   9  956.90   22.05
  -1   2  -9  991.43   20.99
   1   2   9  948.78   21.06
   1  -2   9  970.80   21.03
  -1  -2  -9  989.13   21.42
   1   2   9  972.03   21.56
   1  -2   9  997.72   21.87
   1   2   9  975.22   20.35
   1   2   9 1004.06   21.80
   1  -2  10 1616.39   33.68
   1   2  10 1569.11   33.32
  -1   2 -10 1567.18   32.61
   1  -2  10 1573.03   33.90
   1   2  10 1514.83   31.91
   1   2  10 1571.13   33.55
  -1   2 -10 1628.27   33.33
   1   2  10 1471.64   32.63
  -1  -2 -10 1571.20   33.06
  -1   2 -11   49.51    2.81
  -1   2 -11   54.52    2.52
   1   2  11   49.68    1.98
  -1   2 -11   51.05    1.98
   1   2  11   47.67    2.71
   1  -2  11   54.26    2.89
   1  -2  11   51.86    2.76
   1   2  11   52.26    2.58
   1  -2  12    0.67    1.63
   1   2  12   -0.09    1.55
  -1   2 -12   -0.33    1.02
   1   2  12    1.24    1.51
  -1   2 -12    1.20    1.40
   1   2  12   -1.01    1.05
  -1   2 -12    0.75    1.61
   1  -2  12   -1.19    1.98
   1  -2  13   48.49    2.90
   1   2  13   42.27    1.81
   1   2  13   47.77    2.89
  -1   2 -13   45.14    1.93
   1   2  13   42.28    2.66
  -1   2 -14   47.80    1.96
   1  -2  14   47.37    3.02
   1   2  14   50.33    2.90
  -1   3  14    3.70    1.53
  -1  -3  14    1.60    1.74
   1   3 -14   -0.76    1.91
  -1   3  14    1.70    1.67
  -1  -3  14    0.93    1.58
   1   3 -13  101.51    3.81
   1   3 -13  104.05    4.25
  -1  -3  13  114.98    3.76
  -1  -3  13  100.82    4.14
  -1   3  13  101.41    3.93
  -1   3  13  103.59    3.75
  -1   3  12   60.92    2.85
  -1   3  12   56.95    1.93
   1   3 -12   65.08    3.28
   1   3 -12   64.75    2.81
  -1   3  12   59.58    2.68
  -1  -3  12   60.62    3.28
  -1  -3  12   67.34    3.13
  -1   3  11   12.19    1.46
   1   3 -11    9.64    1.94
  -1  -3  11   12.64    2.00
  -1   3  11   11.36    1.04
  -1   3  11   11.95    1.58
  -1  -3  11   12.13    1.85
   1   3 -11   11.05    1.66
  -1  -3  10   11.66    1.93
   1   3 -10   10.85    0.64
  -1   3  10   14.09    1.11
   1   3 -10   12.83    1.60
  -1   3  10   11.57    1.48
  -1   3  10   12.17    1.39
   1   3 -10   12.54    1.90
  -1  -3  10   10.56    1.68
  -1   3   9    3.26    0.87
   1   3  -9    2.93    0.60
  -1  -3   9    1.65    1.32
  -1   3   9    2.33    1.15
  -1   3   9    3.03    1.07
   1   3  -9    3.27    1.26
  -1  -3   9    2.42    1.47
  -1   3   8   25.82    1.46
  -1   3   8   28.49    1.39
  -1   3   8   26.90    1.56
   1   3  -8   25.48    1.64
   1   3  -8   28.29    1.01
  -1  -3   8   26.21    2.00
  -1  -3   8   28.69    1.86
  -1   3   7  616.33   13.25
  -1  -3   7  589.07   13.80
   1   3  -7  586.65   13.43
  -1   3   7  604.66   13.12
  -1   3   7  610.15   13.15
   1   3  -7  581.68   12.65
  -1  -3   7  580.60   13.56
  -1  -3   6   84.60    2.86
  -1   3   6   85.98    2.61
   1   3  -6   83.79    2.14
  -1   3   6   86.06    2.53
   1  -3  -6   82.95    2.19
  -1  -3   6   93.25    3.11
   1   3  -6   80.59    3.00
  -1   3   6   88.46    2.44
  -1  -3   5   43.22    1.95
  -1  -3   5   48.31    2.15
   1   3  -5   45.38    1.43
   1   3  -5   47.21    2.17
  -1   3   5   40.57    1.81
  -1   3   5   44.58    1.56
   1  -3  -5   42.11    1.28
  -1  -3   4  213.23    5.36
  -1   3   4  211.54    4.73
   1   3  -4  210.65    5.38
  -1  -3   4  216.96    5.29
   1  -3  -4  200.43    4.58
  -1  -3   3  240.39    5.84
   1   3  -3  252.37    5.92
   1  -3  -3  235.02    5.29
   1   3  -3  248.53    5.77
  -1  -3   3  242.90    5.86
   1   3  -2   49.11    1.75
   1   3  -2   51.04    1.81
  -1  -3   2   48.85    1.76
  -1   3   2   53.08    1.32
  -1  -3   2   50.24    1.78
  -1   3   2   53.31    1.58
   1   3  -1 4494.24   92.06
   1   3  -1 4423.80   92.05
  -1   3   1 4469.44   91.87
  -1   3   1 4305.90   91.65
  -1  -3   1 4416.68   92.01
  -1  -3   1 4531.45   92.08
   1   3   0 2141.23   45.79
  -1   3   0 2154.51   45.55
  -1  -3   0 2166.70   45.79
  -1   3   0 2179.39   45.66
   1   3   0 2235.52   45.72
  -1  -3   0 2192.77   45.67
   1   3   0 2211.08   45.89
   1   3   1  563.14   12.21
  -1   3  -1  550.89   12.26
   1  -3   1  564.85   12.32
  -1   3  -1  576.13   12.25
   1   3   1  567.74   12.46
  -1  -3  -2  700.62   15.48
   1  -3   2  706.30   15.32
  -1   3  -2  710.23   15.34
   1   3   2  699.59   15.42
  -1   3  -2  709.81   15.27
   1  -3   3   17.36    1.21
   1  -3   3   17.20    1.23
  -1   3  -3   18.18    1.30
  -1   3  -3   20.36    1.23
   1   3   3   17.09    1.26
  -1   3  -4    1.88    1.15
  -1   3  -4    2.56    0.87
   1  -3   4    2.66    1.24
   1   3   4    3.45    1.12
   1  -3   4    3.26    1.07
  -1   3  -4    1.35    0.98
   1   3   5   64.83    2.33
   1  -3   5   62.95    2.51
   1  -3   5   67.39    2.44
  -1   3  -5   70.05    2.57
  -1   3  -5   64.90    2.38
  -1  -3  -5   68.11    2.50
  -1   3  -5   62.49    1.99
  -1   3  -6   17.80    1.07
  -1  -3  -6   18.52    1.46
   1  -3   6   17.72    1.57
  -1   3  -6   17.20    1.39
   1   3   6   20.27    1.29
   1   3   6   16.87    1.14
   1  -3   6   17.73    1.41
  -1   3  -6   17.82    1.60
   1   3   6   17.43    1.31
  -1   3  -7   10.81    0.98
   1   3   7    8.46    1.06
  -1  -3  -7   12.07    1.35
   1  -3   7   11.17    1.34
  -1   3  -7    7.56    1.35
   1   3   7    8.84    1.06
   1  -3   7   11.04    1.45
   1   3   7   11.27    1.23
  -1  -3  -8  363.88    8.86
   1  -3   8  361.92    9.26
  -1   3  -8  376.23    9.28
   1   3   8  363.13    8.58
   1  -3   8  376.72    9.14
  -1   3  -8  364.97    8.31
   1   3   8  356.29    8.71
   1   3   8  367.02    8.87
   1   3   9  375.69    9.21
  -1   3  -9  376.15    8.51
   1   3   9  371.89    9.04
   1  -3   9  364.21    9.59
  -1   3  -9  365.28    9.17
   1  -3   9  365.14    9.38
   1   3   9  378.58    8.77
   1   3  10  682.00   15.63
   1   3  10  679.76   15.78
  -1   3 -10  680.23   15.68
   1  -3  10  690.98   16.04
  -1   3 -10  681.94   14.97
   1  -3  10  712.22   16.33
   1   3  10  667.65   15.14
   1   3  11   58.21    2.28
   1   3  11   53.82    2.81
  -1   3 -11   61.60    2.17
  -1   3 -11   59.71    2.83
   1  -3  11   62.23    3.20
   1   3  11   63.10    2.78
   1  -3  11   60.08    3.05
  -1   3 -12   -0.10    1.75
   1   3  12    0.47    1.07
  -1   3 -12    0.40    1.03
  -1   3 -12    1.58    1.63
   1   3  12   -0.24    1.45
   1   3  12    1.25    1.59
   1  -3  12    0.81    1.65
   1   3  13  151.08    4.96
  -1   3 -13  147.77    5.24
  -1   3 -13  157.98    4.08
   1   3  13  144.20    4.02
   1   3  13  143.30    5.05
   1  -3  13  140.41    5.18
   1   3  14  115.52    4.26
   1  -3  14  110.44    4.54
  -1   3 -14  105.85    3.14
  -1  -4  14   14.49    2.08
  -1  -4  14    8.97    2.17
   1   4 -14   12.07    2.19
  -1   4  14    8.92    1.65
  -1   4  13  201.46    6.02
  -1  -4  13  212.57    6.52
   1   4 -13  200.62    6.54
  -1   4  12   10.42    1.44
  -1   4  12    8.48    1.12
   1   4 -12   10.11    2.12
  -1  -4  12    8.97    1.83
   1   4 -12    8.73    1.81
  -1   4  12    7.25    1.49
  -1   4  11  164.96    4.53
  -1   4  11  165.43    4.72
  -1   4  11  158.77    4.08
   1   4 -11  162.23    4.84
  -1  -4  11  163.72    5.28
   1   4 -11  167.77    5.35
  -1  -4  11  167.52    5.18
  -1   4  10   -0.26    1.01
  -1   4  10    1.16    1.15
   1   4 -10    0.07    0.69
  -1  -4  10    1.96    1.53
  -1  -4  10    0.86    1.65
   1   4 -10   -0.41    1.43
  -1   4  10    0.06    1.23
   1   4  -9    9.31    0.83
  -1  -4   9    7.92    1.77
  -1   4   9    6.80    1.18
   1   4  -9    9.57    1.53
  -1   4   9    7.91    1.18
  -1  -4   9    8.88    1.56
  -1   4   9    8.72    1.24
  -1  -4   8  203.34    5.80
   1   4  -8  190.22    4.57
  -1   4   8  193.50    5.13
  -1  -4   8  193.55    5.58
   1   4  -8  200.47    5.45
  -1   4   8  212.79    5.18
  -1   4   7 1220.06   25.08
   1   4  -7 1143.68   25.79
  -1   4   7 1194.29   24.96
   1   4  -7 1138.61   24.63
   1   4  -7 1187.85   25.43
  -1  -4   7 1211.32   25.67
   1  -4  -7 1124.84   24.56
  -1   4   7 1187.40   25.23
  -1  -4   7 1207.02   25.82
  -1   4   6  587.69   12.47
  -1   4   6  578.88   12.83
   1  -4  -6  559.49   12.07
   1   4  -6  567.12   12.30
  -1  -4   6  561.51   13.19
   1   4  -6  547.36   13.16
  -1  -4   6  564.76   13.07
   1   4  -5  954.98   20.87
  -1   4   5  955.38   20.63
  -1   4   5  960.26   20.07
   1  -4  -5  926.03   19.84
  -1  -4   5  962.87   20.87
  -1  -4   5  931.53   20.76
   1  -4  -4 1645.49   34.55
  -1  -4   4 1695.12   35.37
  -1  -4   4 1723.59   35.42
  -1   4   3  813.65   17.50
  -1  -4   3  810.47   17.86
  -1   4   3  812.80   17.19
   1   4  -3  824.16   17.77
  -1  -4   3  803.97   17.84
   1   4  -3  814.14   17.91
  -1   4   2  106.51    3.01
   1   4  -2  115.96    3.28
   1   4  -2  116.07    3.26
  -1   4   2  114.41    2.74
  -1  -4   2  115.55    3.23
  -1  -4   2  113.28    3.30
  -1   4   1  496.02   11.08
   1  -4  -1  505.21   10.81
   1   4  -1  515.14   11.29
   1   4  -1  496.84   11.26
  -1  -4   1  505.47   11.29
  -1   4   1  501.63   10.85
  -1   4   0 1544.31   32.32
  -1   4   0 1507.45   32.16
   1   4   0 1573.66   32.47
  -1  -4   0 1528.25   32.44
   1   4   0 1515.57   32.35
   1   4   0 1502.13   32.57
   1   4   1 3145.15   66.15
   1   4   1 3170.91   65.96
   1   4   1 3135.28   65.81
  -1   4  -1 3160.11   65.82
  -1   4  -1 3126.56   65.87
  -1   4  -2 2327.13   48.64
   1   4   2 2285.55   48.85
   1   4   2 2339.75   48.47
   1  -4   2 2312.84   48.75
  -1   4  -2 2273.57   48.66
   1  -4   3 2464.87   52.46
  -1   4  -3 2522.11   52.35
   1   4   3 2455.63   52.53
  -1   4  -3 2493.77   52.48
   1   4   4  253.13    6.32
   1  -4   4  238.29    6.29
  -1   4  -4  253.90    5.97
  -1   4  -4  254.40    6.23
  -1   4  -4  254.48    6.37
   1   4   5   37.94    1.87
  -1   4  -5   37.98    1.90
   1  -4   5   40.35    1.97
  -1   4  -5   41.42    2.08
  -1   4  -5   38.59    1.58
   1  -4   5   37.32    1.99
  -1   4  -6   39.60    1.58
   1  -4   6   42.93    2.18
  -1   4  -6   40.96    2.16
   1   4   6   42.38    1.91
  -1   4  -6   39.97    1.97
   1  -4   6   40.98    2.08
   1   4   7    1.36    0.95
   1  -4   7    0.83    1.25
   1   4   7    1.05    1.07
   1  -4   7    0.61    1.37
  -1   4  -7    2.27    1.32
   1   4   7    1.97    0.85
  -1   4  -7    1.79    0.85
   1  -4   8  283.59    7.49
   1   4   8  284.89    7.06
   1   4   8  277.68    6.97
  -1   4  -8  280.27    7.59
   1  -4   8  281.74    7.63
   1   4   8  281.16    6.99
  -1   4  -8  278.13    6.61
   1   4   9  596.30   13.45
   1  -4   9  591.87   14.29
   1   4   9  581.22   13.57
  -1   4  -9  624.92   14.31
   1  -4   9  591.66   14.11
   1   4   9  581.25   13.67
  -1   4  -9  587.83   13.08
   1   4  10  916.14   20.85
   1  -4  10  961.56   21.63
   1  -4  10  943.29   21.41
  -1   4 -10  941.12   21.06
   1   4  10  942.25   20.57
   1   4  10  935.78   20.97
  -1   4 -10  924.88   20.22
   1   4  11  767.83   18.02
   1  -4  11  801.43   18.55
   1  -4  11  826.81   18.81
  -1   4 -11  795.79   18.11
   1   4  11  770.61   17.47
  -1   4 -11  786.08   17.20
   1   4  11  792.46   17.97
   1   4  12  150.48    4.31
   1   4  12  148.89    4.92
  -1   4 -12  155.55    4.12
   1  -4  12  161.28    5.41
   1   4  12  152.43    4.85
  -1   4 -13   15.05    1.38
   1  -4  13   18.68    2.41
   1   4  13   12.36    1.92
  -1   4 -13   15.36    2.31
   1   4  13   15.58    1.51
   1   4  13   18.09    2.01
   1  -4  14    2.32    1.92
  -1   4 -14    5.07    2.09
   1   4  14    3.85    1.68
   1   5 -14  218.09    7.04
  -1  -5  14  220.90    7.04
  -1   5  14  214.46    6.18
  -1  -5  13    2.18    1.95
  -1   5  13   -0.15    1.37
  -1   5  13    3.34    1.43
   1   5 -13    0.96    2.05
  -1   5  12  134.67    4.05
   1   5 -12  137.46    4.93
  -1   5  12  137.19    3.65
   1   5 -12  142.54    4.49
  -1  -5  12  140.77    4.86
  -1   5  12  138.22    4.21
  -1  -5  11    3.24    1.83
  -1  -5  11    3.01    1.66
   1   5 -11    3.35    0.80
  -1   5  11    2.46    1.37
  -1   5  11    3.45    1.29
   1   5 -11    2.12    1.45
  -1   5  11    1.60    1.15
   1   5 -10   33.19    1.34
  -1   5  10   32.04    1.81
  -1   5  10   31.43    1.91
   1   5 -10   30.87    2.17
  -1  -5  10   32.29    2.39
  -1  -5  10   34.16    2.50
  -1   5  10   34.73    1.91
  -1   5   9    0.28    1.25
   1   5  -9    2.06    1.49
  -1  -5   9    1.65    1.50
  -1   5   9    1.19    1.11
  -1  -5   9   -0.09    1.67
   1   5  -9    2.08    0.83
  -1  -5   8  278.20    7.48
  -1  -5   8  280.25    7.63
  -1   5   8  275.27    6.69
   1   5  -8  270.55    7.59
  -1   5   8  276.27    7.00
   1   5  -8  277.78    6.37
  -1   5   8  282.59    6.76
   1   5  -8  275.96    7.20
   1   5  -7  261.84    6.02
   1   5  -7  244.82    6.93
   1  -5  -7  248.31    5.69
  -1   5   7  267.88    6.18
  -1   5   7  255.39    6.61
  -1  -5   7  262.22    6.97
  -1  -5   7  261.34    7.02
   1  -5  -6  545.86   11.84
  -1  -5   6  564.52   13.10
  -1   5   6  543.58   12.81
  -1  -5   6  559.76   13.02
  -1   5   6  566.87   12.17
   1   5  -6  570.35   13.15
  -1  -5   5   58.46    2.45
  -1  -5   5   56.31    2.50
   1  -5  -5   58.78    1.64
  -1   5   5   55.29    2.50
   1   5  -5   60.14    2.54
  -1   5   4   41.53    1.37
  -1   5   4   40.48    1.68
   1   5  -4   37.24    2.06
   1   5  -4   42.10    1.92
  -1  -5   4   35.40    1.97
  -1  -5   4   41.10    2.05
   1   5  -3  253.36    6.37
  -1   5   3  250.05    5.63
  -1   5   3  247.18    5.99
  -1  -5   3  243.50    6.28
   1   5  -3  243.33    6.24
  -1  -5   3  244.24    6.32
  -1   5   2 1021.87   21.92
   1   5  -2 1033.00   22.49
  -1  -5   2 1060.82   22.57
   1   5  -2 1037.30   22.48
  -1   5   2 1030.48   22.24
   1  -5  -1  164.52    3.95
  -1   5   1  170.29    4.31
  -1  -5   1  162.00    4.45
   1   5  -1  159.14    4.40
   1   5  -1  174.55    4.50
  -1   5   1  158.45    4.01
  -1   5   0  139.24    3.70
  -1  -5   0  127.68    3.77
   1   5   0  134.47    3.83
   1   5   0  134.83    3.70
  -1   5   0  133.06    3.49
   1  -5   0  130.05    3.43
   1   5   1   32.11    1.59
   1   5   1   35.36    1.81
   1  -5   1   34.18    1.58
  -1   5  -1   31.27    1.66
   1   5   1   35.25    2.06
  -1   5  -1   30.41    1.58
   1   5   2    3.24    1.13
  -1   5  -2    4.64    1.17
   1   5   2    3.18    1.43
   1   5   2    4.71    0.98
  -1   5  -2    4.89    1.15
   1   5   3  115.06    3.14
  -1   5  -3  110.16    3.33
   1  -5   3  109.52    3.45
  -1   5  -3  107.30    3.41
   1   5   3  110.50    3.63
   1  -5   4  891.36   19.58
  -1   5  -4  893.71   19.41
   1   5   4  876.93   19.61
  -1   5  -4  871.67   19.20
  -1   5  -4  882.24   19.58
  -1   5  -5    4.00    1.07
   1  -5   5    6.98    1.29
   1   5   5    6.58    1.32
  -1   5  -5    7.80    1.03
  -1   5  -5    5.89    1.31
  -1   5  -6  234.51    6.10
   1  -5   6  228.92    6.30
  -1   5  -6  228.73    6.31
   1  -5   6  222.14    6.18
  -1   5  -6  228.91    5.61
   1   5   6  233.05    6.11
  -1   5  -7   13.64    1.70
   1  -5   7   15.90    1.68
  -1   5  -7   12.76    1.56
   1  -5   7   17.35    1.83
   1   5   7   16.27    1.33
  -1   5  -7   19.49    1.28
   1   5   7   16.95    1.57
  -1   5  -8  747.55   16.93
   1  -5   8  724.91   16.91
  -1   5  -8  726.91   15.80
   1   5   8  711.08   16.13
   1   5   8  705.94   16.06
   1   5   8  731.31   16.32
   1  -5   8  710.22   16.75
   1  -5   9  216.05    6.41
  -1   5  -9  204.51    5.21
   1  -5   9  216.15    6.25
   1   5   9  201.50    5.62
  -1   5  -9  218.86    6.33
   1   5   9  198.49    5.62
   1   5   9  204.22    5.60
  -1   5 -10   18.13    2.28
   1  -5  10   16.52    2.07
  -1   5 -10   16.32    1.93
   1   5  10   16.06    1.69
  -1   5 -10   15.83    1.41
   1   5  10   15.77    1.70
   1  -5  10   15.32    2.24
   1   5  10   15.43    1.65
  -1   5 -11  135.32    4.59
   1   5  11  130.87    4.40
   1   5  11  138.88    4.18
  -1   5 -11  137.02    3.80
   1   5  11  130.69    4.39
  -1   5 -11  131.00    4.93
   1  -5  11  135.91    4.98
   1   5  12   82.75    3.38
   1  -5  12   86.54    3.91
   1   5  12   78.20    3.00
  -1   5 -12   82.41    2.73
   1   5  12   85.18    3.41
  -1   5 -13   90.18    2.88
   1  -5  13   95.31    4.25
   1   5  13   87.19    3.66
   1   5  13   88.87    3.62
   1   5  13   91.13    3.14
   1   6 -13   86.67    4.16
  -1  -6  13   90.16    4.14
  -1   6  13   83.35    3.27
  -1   6  12   25.69    1.91
  -1  -6  12   22.03    2.44
   1   6 -12   24.58    1.36
   1   6 -12   24.46    1.19
  -1   6  12   24.23    1.86
  -1   6  12   26.27    1.75
   1   6 -11   76.93    2.28
   1   6 -11   74.38    3.32
  -1   6  11   75.85    2.93
  -1   6  11   72.04    2.83
  -1   6  11   78.38    2.94
   1   6 -10   28.78    1.38
   1   6 -10   28.11    2.18
  -1  -6  10   26.02    2.33
  -1   6  10   29.37    1.80
  -1   6  10   26.44    1.86
  -1   6  10   26.31    1.77
  -1   6   9    9.12    1.23
   1   6  -9    8.52    1.87
  -1   6   9   10.42    1.29
  -1   6   9   11.56    1.62
   1   6  -9    9.89    1.06
  -1  -6   9    7.89    1.69
  -1  -6   9    9.34    1.94
   1   6  -9    7.58    1.57
  -1  -6   8   57.37    2.98
   1   6  -8   56.97    3.01
  -1   6   8   58.15    2.17
  -1   6   8   59.80    2.66
   1  -6  -8   56.36    1.67
   1   6  -8   61.29    2.75
  -1  -6   8   61.66    2.97
   1   6  -8   53.88    2.00
  -1  -6   7  637.83   14.91
  -1  -6   7  637.62   14.89
  -1   6   7  630.97   14.59
   1   6  -7  613.52   14.89
   1   6  -7  637.68   13.91
  -1   6   7  636.40   13.82
   1  -6  -7  619.58   13.40
  -1   6   6  401.50    8.75
  -1   6   6  396.21    9.71
   1   6  -6  390.44    9.82
  -1  -6   6  365.92    9.69
   1  -6  -6  388.34    8.50
  -1  -6   6  392.48    9.81
  -1   6   5  429.67   10.41
  -1  -6   5  428.24   10.28
  -1   6   5  411.80    9.35
  -1  -6   5  418.15   10.31
  -1   6   5  433.97    9.84
   1   6  -5  422.08   10.35
  -1  -6   4    9.97    1.33
  -1   6   4    9.67    0.82
   1   6  -4    9.15    1.28
   1   6  -4   12.49    1.48
  -1   6   4    9.91    1.14
  -1  -6   3 1037.98   22.45
  -1   6   3 1008.17   22.06
   1   6  -3 1025.73   22.31
   1   6  -3 1029.19   22.45
  -1   6   3 1001.34   21.65
   1   6  -2   71.70    2.66
  -1   6   2   66.08    2.12
  -1   6   2   70.85    2.45
  -1  -6   2   74.13    2.73
   1   6  -2   67.70    2.61
   1  -6  -1  271.27    6.72
  -1   6   1  284.55    6.76
  -1   6   1  267.40    6.44
   1   6  -1  271.75    6.80
   1   6  -1  275.98    6.92
  -1  -6   1  280.82    6.96
   1  -6  -1  275.41    6.35
  -1   6   0  488.02   10.91
   1   6   0  484.76   11.09
  -1  -6   0  477.74   10.94
  -1  -6   0  464.02   11.20
  -1   6   0  486.69   11.10
   1   6   0  495.99   11.24
   1  -6   0  490.00   10.82
  -1  -6  -1 1245.18   26.44
  -1   6  -1 1233.07   26.61
  -1   6  -1 1233.91   26.70
   1   6   1 1215.83   26.59
   1   6   1 1243.16   27.11
   1  -6   1 1246.61   26.54
   1   6   1 1239.94   26.81
  -1   6  -2  107.87    3.37
   1  -6   2  107.51    3.28
   1   6   2  110.47    3.46
   1   6   2  107.98    3.72
  -1   6  -2  109.96    3.36
   1   6   2  110.39    3.22
  -1   6  -3 1880.60   41.84
   1   6   3 2030.22   41.86
  -1   6  -3 1971.36   41.80
   1  -6   3 1995.69   42.02
   1   6   3 1949.07   41.53
   1  -6   3 1948.49   41.84
  -1   6  -4  186.70    5.18
  -1   6  -4  188.61    5.03
   1  -6   4  180.92    5.23
   1   6   4  175.93    5.24
   1   6   4  181.07    4.71
  -1   6  -5   64.06    2.69
   1  -6   5   61.90    2.73
  -1   6  -5   61.52    2.31
  -1   6  -5   62.85    2.58
   1   6   5   61.98    2.72
  -1   6  -6    2.37    1.21
   1   6   6   -0.71    1.27
  -1   6  -6    2.24    1.03
  -1  -6  -6    1.88    0.38
  -1   6  -6    0.78    1.34
   1  -6   6    1.09    1.38
   1   6   7   29.28    2.07
   1  -6   7   26.50    2.12
  -1   6  -7   26.85    2.22
  -1   6  -7   25.49    1.89
  -1   6  -7   26.47    1.54
  -1   6  -8   75.95    2.54
   1   6   8   70.29    2.98
   1  -6   8   70.76    3.28
  -1   6  -8   73.68    3.34
   1  -6   8   72.09    3.23
   1   6   8   70.03    2.65
   1  -6   9  610.24   14.46
   1   6   9  592.78   13.75
  -1   6  -9  598.16   14.41
   1   6   9  581.83   13.52
   1  -6   9  584.98   14.33
   1   6   9  581.39   13.50
  -1   6  -9  585.74   13.17
   1  -6  10    6.79    2.04
   1  -6  10    6.61    1.79
   1   6  10    5.13    1.53
  -1   6 -10    5.70    1.24
   1   6  10    7.01    1.46
   1   6  10    6.63    1.51
  -1   6 -10    7.88    2.12
   1   6  11  850.91   18.90
  -1   6 -11  821.27   18.34
   1  -6  11  841.49   19.85
   1   6  11  847.73   19.06
  -1   6 -11  865.36   19.92
   1   6  11  825.26   19.01
   1   6  12  550.17   13.01
  -1   6 -12  575.58   14.18
   1   6  12  551.54   13.30
  -1   6 -12  546.97   12.55
   1  -6  12  571.23   14.19
   1   6  12  571.36   13.42
   1   6  13    1.98    1.46
   1  -6  13    1.92    2.07
  -1   6 -13    1.87    1.22
   1   6  13   -0.17    1.70
   1   7 -13   14.69    1.19
  -1  -7  13   18.47    2.53
  -1   7  13   16.37    1.74
  -1  -7  12   -0.12    1.89
   1   7 -12    1.44    0.94
   1   7 -12    1.11    1.14
  -1   7  12    0.82    1.34
  -1   7  12    0.25    1.28
   1   7 -11   17.11    1.24
  -1   7  11   16.93    1.58
  -1   7  11   16.09    1.61
  -1  -7  11   20.30    2.32
  -1   7  11   16.13    1.77
  -1  -7  10    5.57    1.76
   1   7 -10    8.81    1.81
  -1   7  10    4.71    1.29
  -1   7  10    5.34    1.22
  -1   7  10    3.97    1.51
   1   7 -10    6.00    1.86
   1   7 -10    6.08    1.08
  -1  -7   9   56.79    3.10
  -1   7   9   56.06    2.22
   1   7  -9   49.20    3.07
   1   7  -9   53.14    2.00
   1   7  -9   52.49    2.76
  -1   7   9   52.55    2.16
   1  -7  -9   50.70    1.60
  -1  -7   9   55.90    3.07
  -1   7   9   52.38    2.68
  -1  -7   8   49.72    2.87
  -1   7   8   47.19    1.92
   1  -7  -8   47.35    1.48
   1   7  -8   45.32    2.80
   1   7  -8   49.31    2.00
  -1  -7   8   46.42    2.71
  -1   7   8   44.81    2.55
   1   7  -8   45.48    2.46
  -1  -7   7  104.63    4.07
  -1  -7   7  110.37    4.03
  -1   7   7  106.30    3.02
  -1   7   7  110.12    3.08
   1  -7  -7  109.52    2.73
   1   7  -7  105.13    3.31
   1   7  -7  111.17    4.12
  -1   7   7  110.32    4.03
  -1   7   6   24.97    1.28
   1  -7  -6   23.22    1.08
   1   7  -6   24.55    2.17
  -1   7   6   22.68    1.67
  -1   7   6   28.36    2.27
  -1  -7   6   22.11    2.02
  -1  -7   5  105.85    3.85
   1   7  -5  103.62    3.84
  -1   7   5  107.46    4.06
  -1   7   5  104.88    3.39
  -1   7   5  105.46    2.94
   1   7  -5  104.64    3.61
   1   7  -4   96.29    3.49
  -1  -7   4   92.23    3.45
   1   7  -4   92.67    3.26
  -1   7   4   95.37    3.10
  -1   7   4   89.91    2.65
  -1   7   3  642.88   14.03
  -1  -7   3  638.02   14.86
   1   7  -3  641.63   14.83
  -1   7   3  643.70   14.47
   1   7  -3  634.37   14.68
   1   7  -2  208.10    5.80
  -1  -7   2  207.70    5.91
  -1  -7   2  207.06    5.64
  -1   7   2  218.08    5.26
   1   7  -2  218.91    5.83
  -1   7   2  221.06    5.65
  -1   7   1 1509.98   32.01
   1  -7  -1 1508.23   31.85
  -1  -7   1 1502.43   32.56
   1   7  -1 1465.90   32.40
   1   7  -1 1507.71   32.50
  -1  -7   1 1498.72   32.25
   1  -7  -1 1502.75   32.33
  -1   7   1 1512.13   32.33
  -1   7   0  248.35    6.16
  -1  -7   0  246.58    6.14
   1  -7   0  255.48    6.06
  -1   7   0  252.51    6.38
   1   7   0  242.53    6.46
   1   7   0  236.24    6.29
   1   7   1  114.57    3.68
   1   7   1  115.73    4.02
  -1   7  -1  109.75    3.51
  -1   7  -1  118.80    3.50
   1   7   1  113.34    3.48
   1  -7   1  112.40    3.37
  -1  -7  -1  114.54    3.30
   1   7   2   47.99    2.03
  -1   7  -2   47.37    2.15
  -1   7  -2   48.39    2.17
   1  -7   2   50.89    2.14
   1   7   2   49.79    2.32
   1   7   2   50.14    2.62
   1   7   3   10.26    1.64
   1  -7   3   11.66    1.35
  -1   7  -3    8.56    1.34
   1   7   3    7.72    1.11
  -1   7  -3    8.27    1.35
   1   7   3    9.53    1.38
  -1   7  -4    0.71    1.29
   1  -7   4    0.61    1.13
   1  -7   4    0.15    1.38
   1   7   4   -0.25    1.48
   1   7   4    0.20    0.96
  -1   7  -4    1.04    1.13
   1   7   4    1.45    1.19
  -1   7  -5   10.35    1.59
   1   7   5   14.44    1.82
   1   7   5   15.50    1.32
   1  -7   5   10.03    1.64
   1  -7   5   13.14    1.69
  -1   7  -5   13.82    1.52
  -1   7  -5   11.42    1.41
   1   7   6   89.11    2.95
  -1   7  -6   89.19    3.48
  -1   7  -6   86.30    2.99
   1   7   6   85.75    3.50
  -1   7  -6   87.63    3.31
   1  -7   6   84.00    3.52
  -1   7  -7  368.22    8.28
   1   7   7  364.48    8.96
   1  -7   7  371.69    9.22
  -1   7  -7  365.85    9.20
  -1   7  -7  378.72    8.89
  -1   7  -8  230.89    5.80
  -1   7  -8  218.50    6.71
   1  -7   8  224.85    6.76
   1   7   8  227.31    6.42
   1   7   8  226.79    5.86
   1  -7   9  237.40    7.07
   1   7   9  230.76    6.12
  -1   7  -9  234.47    7.07
   1   7   9  233.92    6.56
  -1   7  -9  232.58    5.92
   1  -7  10  302.74    8.56
   1   7  10  295.96    7.63
   1   7  10  289.84    7.83
  -1   7 -10  299.20    7.29
   1   7  10  299.37    7.67
  -1   7 -10  311.63    8.66
   1  -7  11    5.44    2.04
  -1   7 -11    3.57    1.30
  -1   7 -11    1.43    2.02
   1   7  11    4.05    1.48
   1   7  11    2.78    1.55
   1   7  11    4.29    1.55
  -1   7 -12   -0.12    2.15
   1   7  12    1.72    1.53
   1   7  12    3.04    1.61
   1   7  12    2.14    1.67
   1  -7  12    3.35    2.05
  -1   8  12   32.47    2.21
  -1   8  12   40.70    2.24
  -1  -8  12   38.23    3.08
   1   8 -12   39.01    2.07
   1   8 -12   36.94    1.71
   1   8 -12   41.22    3.24
  -1  -8  11   90.92    4.31
   1   8 -11   85.26    4.15
   1   8 -11   91.63    2.81
  -1   8  11   89.04    3.47
  -1   8  11   94.54    3.29
   1   8 -10   30.34    1.66
  -1   8  10   29.03    1.81
   1   8 -10   30.79    2.69
  -1   8  10   32.07    2.33
  -1  -8  10   32.36    2.73
  -1   8  10   33.25    1.81
  -1  -8   9   43.95    2.86
   1  -8  -9   39.55    1.38
  -1  -8   9   47.04    3.01
  -1   8   9   43.12    1.88
  -1   8   9   43.00    2.64
  -1   8   9   39.68    1.89
   1   8  -9   43.02    2.92
   1   8  -9   42.78    2.61
   1   8  -9   45.75    1.97
  -1   8   9   44.48    2.36
  -1   8   8   74.21    2.47
   1  -8  -8   73.14    2.02
  -1  -8   8   67.94    3.46
  -1   8   8   74.02    2.42
   1   8  -8   72.80    2.66
  -1  -8   8   73.13    3.44
  -1   8   8   75.72    3.43
   1   8  -8   71.20    3.57
  -1   8   8   74.21    2.99
  -1   8   7   91.01    2.78
  -1   8   7   96.39    3.90
  -1   8   7   89.58    3.30
  -1  -8   7   92.32    3.90
   1  -8  -7   89.38    2.40
   1   8  -7   87.19    3.78
  -1   8   7   89.08    2.64
  -1  -8   6  155.87    5.15
  -1   8   6  156.16    4.09
   1   8  -6  157.98    5.16
  -1   8   6  150.87    4.61
   1  -8  -6  150.25    3.77
  -1   8   6  168.23    5.44
  -1   8   5   88.72    3.86
  -1  -8   5   82.53    3.50
  -1   8   5   80.35    3.04
   1   8  -5   83.58    3.50
  -1   8   5   81.01    2.56
   1   8  -5   81.23    3.25
  -1  -8   4  203.48    6.00
   1   8  -4  203.56    5.81
   1   8  -4  212.02    6.00
  -1   8   4  202.93    5.58
  -1   8   4  197.68    5.06
  -1  -8   3   99.42    3.74
  -1   8   3   96.70    3.34
   1   8  -3  105.62    3.73
  -1   8   3   94.98    2.93
  -1  -8   3  103.12    3.56
   1   8  -3  104.64    3.66
   1   8  -2   17.89    1.64
  -1   8   2   13.89    1.21
  -1  -8   2   18.19    1.74
   1   8  -2   15.37    1.72
  -1   8   2   19.62    1.60
  -1  -8   2   15.57    1.54
  -1  -8   1  347.25    8.51
  -1   8   1  341.04    8.26
  -1  -8   1  343.45    8.81
   1  -8  -1  351.66    8.60
  -1   8   1  348.05    8.59
   1   8  -1  357.71    8.71
   1   8  -1  362.77    8.84
   1  -8  -1  340.48    8.06
   1  -8   0   16.45    1.31
   1   8   0   16.58    1.50
  -1   8   0   18.87    1.42
   1  -8   0   14.19    1.53
  -1   8   0   16.89    1.57
   1   8   0   14.64    1.98
   1   8   0   20.77    1.69
  -1  -8   0   19.18    1.43
   1   8   1   75.32    2.77
  -1   8  -1   75.77    2.91
  -1   8  -1   75.50    2.80
   1   8   1   74.92    2.97
   1  -8   1   74.18    2.66
  -1   8  -2   34.51    1.94
   1  -8   2   33.96    1.91
  -1   8  -2   30.01    2.01
   1   8   2   32.77    2.40
   1   8   2   32.71    2.02
   1   8   2   34.44    1.86
  -1   8  -3   12.93    1.62
   1  -8   3   14.43    1.56
   1   8   3   15.77    2.03
   1   8   3   14.61    1.39
   1   8   3   14.33    1.61
  -1   8  -3   15.18    1.59
   1   8   4  131.84    3.96
  -1   8  -4  132.02    4.28
  -1   8  -4  138.56    4.43
   1  -8   4  133.63    4.27
   1   8   4  131.63    4.67
   1   8   4  133.91    4.33
  -1   8  -5   80.79    3.36
   1  -8   5   78.57    3.23
   1   8   5   76.36    2.80
   1   8   5   78.49    3.49
   1  -8   5   73.56    3.38
   1   8   5   74.77    3.13
  -1   8  -5   82.24    3.14
  -1   8  -5   76.22    2.95
  -1   8  -6   10.23    1.69
  -1   8  -6    7.66    1.69
   1  -8   6    9.29    1.81
   1  -8   6    7.90    1.70
   1   8   6   10.26    1.37
   1   8   6    5.47    1.86
   1   8   6   10.91    1.67
  -1   8  -6    6.88    1.44
   1  -8   7  234.22    7.15
   1  -8   7  237.81    7.01
  -1  -8  -7  243.77    5.30
  -1   8  -7  257.02    6.89
  -1   8  -7  235.20    7.11
   1   8   7  246.57    7.03
   1   8   7  258.98    6.39
  -1   8  -7  232.78    6.27
  -1   8  -8  121.58    3.76
  -1   8  -8  125.74    4.36
   1   8   8  123.29    4.43
  -1   8  -8  116.97    4.58
   1  -8   8  112.59    4.62
   1   8   8  133.16    3.94
  -1   8  -9  331.62    9.42
   1   8   9  347.92    9.00
   1   8   9  340.23    8.35
  -1   8  -9  343.33    8.26
   1  -8   9  335.13    9.48
   1   8  10    2.50    1.72
   1   8  10    0.99    1.21
   1  -8  10    0.24    2.00
  -1   8 -10    2.00    1.30
   1   8  10    2.13    1.29
  -1   8 -10    1.77    1.89
   1   8  11   10.81    1.64
  -1   8 -11   16.96    2.46
   1   8  11   10.09    1.66
   1   8  11   11.14    1.86
  -1   8 -11   11.46    1.51
   1  -8  11   11.81    2.29
  -1   8 -12  403.00    9.58
  -1   8 -12  414.37   11.25
   1   8  12  414.77   10.24
   1  -8  12  409.63   11.27
   1   8  12  396.65   10.15
   1   9 -11   39.17    2.44
  -1   9  11   42.35    2.66
   1   9 -11   42.79    1.96
   1   9 -11   44.88    3.23
  -1   9  11   42.42    2.25
  -1  -9  11   48.92    3.37
   1   9 -10   -0.89    2.05
  -1   9  10    0.85    1.12
  -1   9  10    0.16    1.52
   1   9 -10   -0.61    1.13
  -1   9  10    0.67    1.77
  -1  -9  10    0.63    1.85
  -1   9  10    0.33    1.06
   1   9  -9   21.48    2.50
  -1   9   9   22.22    2.35
  -1   9   9   22.45    1.47
  -1  -9   9   23.62    2.47
   1  -9  -9   21.43    1.04
  -1   9   9   25.12    2.04
   1   9  -9   20.56    1.65
  -1   9   9   22.36    1.49
   1   9  -8  132.73    4.04
  -1   9   8  139.30    3.66
   1  -9  -8  130.79    3.26
  -1   9   8  128.32    4.35
   1   9  -8  136.63    5.09
  -1  -9   8  130.52    4.98
  -1   9   8  146.92    5.09
  -1   9   8  122.26    3.69
  -1   9   7   78.84    2.67
  -1  -9   7   85.55    3.88
  -1   9   7   83.31    3.31
  -1   9   7   87.67    3.98
   1  -9  -7   83.39    2.34
   1   9  -7   88.40    3.84
  -1  -9   6    6.87    1.76
   1   9  -6    9.45    1.96
  -1   9   6    7.31    1.56
   1   9  -6    7.51    1.76
  -1   9   6    8.13    2.28
  -1  -9   6    6.97    1.82
  -1   9   6    8.75    1.12
  -1  -9   5    3.00    1.72
  -1   9   5    1.72    1.39
   1   9  -5    2.95    1.56
  -1  -9   5    4.05    1.63
  -1   9   5    1.30    2.09
  -1   9   5    2.69    0.98
   1   9  -5    5.36    1.73
   1   9  -4  921.59   21.01
   1   9  -4  946.04   20.82
  -1  -9   4  910.02   21.08
  -1  -9   4  930.42   20.80
  -1   9   4  899.10   20.50
  -1   9   4  902.47   19.94
   1   9  -3 1104.29   24.96
   1   9  -3 1151.19   25.15
  -1   9   3 1123.17   24.77
  -1  -9   3 1106.11   24.83
  -1   9   3 1106.99   24.24
  -1  -9   3 1146.91   25.26
  -1  -9   2    3.21    1.48
   1   9  -2    2.83    1.48
   1   9  -2    1.79    1.58
  -1   9   2    1.56    1.38
  -1   9   2    2.73    1.14
   1   9  -1  200.19    5.86
  -1   9   1  202.15    5.69
  -1   9   1  202.17    5.40
  -1  -9   1  206.58    5.58
   1   9  -1  201.00    5.74
   1  -9  -1  193.91    5.11
   1  -9   0   35.06    2.25
   1   9   0   33.39    2.06
  -1   9   0   38.91    2.01
  -1  -9   0   38.46    1.96
   1   9   0   31.25    2.14
   1  -9   0   34.94    1.82
  -1   9   0   34.15    2.17
   1   9   1   39.39    2.83
  -1   9  -1   40.76    2.20
   1   9   1   41.43    2.16
   1  -9   1   42.08    2.44
   1   9   1   40.36    2.39
   1  -9   1   40.34    2.05
  -1   9  -1   44.95    2.32
  -1   9  -2   42.91    2.26
   1   9   2   37.96    2.77
  -1   9  -2   38.54    2.29
   1   9   2   39.60    2.39
   1   9   2   40.40    2.14
   1  -9   2   37.56    2.11
   1   9   3   34.02    2.70
   1   9   3   32.03    1.96
   1   9   3   31.67    2.26
  -1   9  -3   36.10    2.29
   1  -9   3   33.27    2.13
  -1   9  -3   35.33    2.20
   1   9   4   35.84    2.01
   1   9   4   36.04    2.74
   1  -9   4   35.71    2.27
   1   9   4   31.21    2.30
  -1   9  -4   36.49    2.40
  -1   9  -4   36.32    2.31
   1  -9   5    0.76    1.48
  -1   9  -5    0.65    1.45
   1   9   5   -0.53    1.92
  -1   9  -5    0.83    1.65
   1   9   5    0.59    1.53
   1   9   5    0.94    1.23
  -1   9  -6   19.40    2.14
  -1   9  -6   23.86    1.95
   1  -9   6   22.41    2.24
   1   9   6   21.85    2.14
   1   9   6   19.87    2.29
  -1   9  -6   19.63    2.08
   1   9   6   20.18    1.71
   1  -9   6   17.50    2.12
   1   9   7  163.30    5.31
   1   9   7  169.28    5.66
  -1   9  -7  175.98    5.73
   1  -9   7  161.45    5.50
  -1  -9  -7  169.78    3.89
   1   9   7  170.60    4.92
   1  -9   7  169.05    5.75
  -1   9  -7  173.50    4.96
  -1   9  -7  171.04    5.39
  -1  -9  -8   14.02    0.56
   1  -9   8   15.55    2.04
   1   9   8   15.76    1.97
   1   9   8   15.94    2.23
  -1   9  -8   21.10    2.37
  -1   9  -8   19.34    1.72
   1  -9   8   18.20    2.26
   1   9   8   17.97    1.67
   1   9   9    4.53    1.40
  -1   9  -9    2.59    1.86
  -1   9  -9    2.53    1.41
   1   9   9    6.52    1.86
   1   9   9    4.23    1.22
   1  -9   9    3.52    1.96
   1   9  10    3.33    1.40
  -1   9 -10    1.51    1.38
   1   9  10    2.98    1.85
   1   9  10    1.86    1.34
  -1   9 -10    2.61    2.09
   1  -9  10    1.80    2.06
   1   9  11    2.91    1.83
  -1   9 -11    5.03    2.22
   1   9  11    3.96    1.53
   1  -9  11    0.95    2.12
   1   9  11    3.45    1.45
  -1   9 -11    2.37    1.44
   1  10 -11   72.98    2.69
  -1  10  11   70.81    2.87
   1  10 -11   76.73    3.34
  -1  10  11   78.02    3.62
  -1  10  10    1.73    1.92
   1 -10 -10    0.80    0.68
  -1 -10  10   -0.80    1.99
   1  10 -10    0.13    2.02
  -1  10  10   -0.09    1.60
   1  10 -10    2.07    1.30
  -1  10   9   12.50    1.29
   1  10  -9   16.42    2.45
  -1 -10   9   13.97    2.39
  -1  10   9   14.52    2.38
   1  10  -9   13.04    1.62
   1 -10  -9   13.30    0.92
  -1  10   9   14.02    1.86
  -1  10   8  271.72    6.99
   1 -10  -8  288.78    6.55
  -1  10   8  283.41    7.75
  -1  10   8  296.57    6.92
  -1 -10   8  291.12    8.54
   1  10  -8  292.47    7.48
   1  10  -8  288.61    8.59
  -1  10   7   11.12    2.53
  -1  10   7   13.56    1.84
  -1 -10   7   11.53    2.16
  -1  10   7   10.93    1.24
   1 -10  -7   11.52    1.03
   1  10  -7   10.21    2.12
  -1 -10   6    2.53    1.57
   1  10  -6    2.25    1.58
  -1  10   6    1.85    2.20
   1  10  -6   -0.56    1.82
  -1 -10   6    2.51    1.74
  -1  10   6    0.32    1.46
  -1  10   6    0.80    0.99
  -1  10   5   27.72    2.06
   1  10  -5   24.71    2.37
  -1 -10   5   22.03    2.16
   1  10  -5   20.99    2.04
  -1  10   5   23.94    1.53
  -1  10   5   23.05    2.83
  -1 -10   5   20.45    2.40
   1  10  -4  102.36    3.81
  -1  10   4   88.42    3.04
  -1 -10   4   91.23    4.04
  -1  10   4   98.00    3.63
   1  10  -4  100.24    4.00
  -1  10   4  107.90    4.76
  -1 -10   4   88.12    3.62
  -1  10   3    4.92    1.58
  -1  10   3    2.33    1.13
   1  10  -3    3.20    1.72
  -1 -10   3    2.93    1.87
  -1 -10   3   -0.48    1.46
   1  10  -3    1.13    1.65
  -1  10   2  992.25   22.43
  -1 -10   2 1017.39   22.39
  -1  10   2  983.31   21.97
   1  10  -2  980.62   22.66
   1  10  -2 1030.99   22.68
  -1  10   1  191.65    5.65
   1  10  -1  188.20    5.69
  -1  10   1  186.80    5.29
   1  10  -1  185.11    5.74
   1 -10  -1  190.27    5.03
  -1 -10   1  195.19    5.45
   1 -10   0  153.02    4.47
   1  10   0  161.25    4.97
   1 -10   0  162.87    5.14
  -1 -10   0  153.11    4.61
  -1  10   0  160.64    4.99
   1  10   0  158.34    5.10
  -1  10   0  158.96    4.75
   1  10   1   22.37    2.62
  -1  10  -1   20.62    1.92
   1  10   1   24.86    2.12
   1  10   1   23.85    1.90
  -1  10  -1   22.40    1.91
   1 -10   1   22.11    2.04
   1 -10   1   24.98    1.80
  -1  10  -2   40.18    2.40
   1 -10   2   39.78    2.24
   1  10   2   43.80    2.62
   1  10   2   41.49    2.27
   1 -10   2   39.42    2.60
  -1  10  -2   40.09    2.42
   1  10   2   37.09    3.00
   1  10   3   30.77    2.33
   1 -10   3   29.60    2.10
  -1  10  -3   29.80    2.26
   1  10   3   26.71    1.96
  -1  10  -3   27.15    2.19
   1  10   3   33.01    2.83
   1  10   4   35.37    2.91
  -1  10  -4   31.86    2.34
   1  10   4   30.39    2.32
   1 -10   4   26.83    2.14
  -1  10  -4   31.54    2.26
   1  10   4   26.29    1.93
   1 -10   5    0.09    1.60
  -1  10  -5   -0.30    1.67
   1  10   5   -0.47    2.02
   1  10   5    0.09    1.68
  -1  10  -5    0.97    1.50
   1  10   5    1.72    1.34
   1  10   6  823.53   18.86
   1  10   6  756.10   17.66
  -1  10  -6  787.14   17.85
   1  10   6  777.62   18.25
  -1  10  -6  801.25   18.51
   1 -10   6  774.21   18.28
   1 -10   6  774.77   18.66
  -1  10  -6  778.01   18.16
   1  10   7  412.43   10.59
   1  10   7  411.29   10.02
  -1  10  -7  407.49   10.06
  -1  10  -7  423.89   10.91
   1 -10   7  408.60   11.05
   1  10   7  429.20   11.04
   1 -10   7  405.97   10.72
  -1 -10  -7  406.43    8.92
   1  10   8    7.38    1.47
  -1  10  -8    6.29    1.55
  -1 -10  -8    6.17    0.57
   1  10   8    5.92    2.15
   1  10   8    7.59    1.86
   1 -10   8    7.06    2.08
  -1  10  -8    8.88    2.13
   1  10   9   -0.44    2.01
  -1  10  -9    1.48    2.01
   1  10   9    0.30    1.18
   1 -10   9   -0.77    1.97
  -1  10  -9   -1.25    1.38
   1  10   9    0.77    1.37
   1  10   9    0.69    1.79
  -1  10 -10    7.45    2.27
   1 -10  10    4.75    2.19
  -1  10 -10    6.18    1.55
   1  10  10    2.62    1.40
  -1 -11   9    7.98    2.27
  -1  11   9    9.70    2.49
   1  11  -9    8.85    2.06
  -1  11   9    7.41    1.84
   1 -11  -9    7.56    0.89
   1  11  -9    5.40    2.27
   1  11  -9    6.50    1.57
   1  11  -8    8.68    1.68
  -1  11   8   11.28    2.68
  -1 -11   8    7.89    2.19
   1 -11  -8    8.36    0.92
   1  11  -8    9.38    2.28
  -1  11   8    9.62    1.83
  -1  11   7   54.56    2.19
  -1 -11   7   55.22    3.41
  -1  11   7   47.44    2.74
   1 -11  -7   52.22    1.87
  -1  11   7   58.15    3.80
   1  11  -7   57.89    3.47
  -1  11   6   43.26    2.03
  -1 -11   6   42.35    3.12
   1  11  -6   46.61    3.10
  -1  11   6   44.68    2.60
   1  11  -5   10.68    2.04
  -1  11   5   11.60    1.86
  -1 -11   5   10.57    1.88
  -1  11   5   10.73    1.33
  -1  11   5   14.71    2.87
  -1 -11   5   10.29    2.24
  -1 -11   4   25.96    2.63
   1  11  -4   29.19    2.55
  -1  11   4   26.87    1.74
  -1  11   4   27.46    2.20
   1  11  -4   27.18    2.34
  -1  11   4   31.86    3.28
  -1 -11   4   28.59    2.37
   1  11  -3  803.99   18.62
  -1  11   3  780.85   17.82
  -1  11   3  804.62   18.43
   1  11  -3  795.59   18.72
  -1 -11   3  808.27   18.41
  -1  11   2   60.97    2.97
   1  11  -2   59.35    3.13
  -1  11   2   58.70    2.56
   1  11  -2   60.38    3.07
  -1 -11   2   57.81    2.80
   1  11  -2   50.24    3.49
   1 -11  -1   81.90    2.85
   1  11  -1   75.77    3.50
   1  11  -1   86.08    3.54
  -1  11   1   82.44    3.16
  -1 -11   1   86.00    3.25
  -1  11   1   81.61    3.48
   1 -11   0    0.37    1.61
   1  11   0   -0.78    1.44
  -1  11   0    0.68    1.30
  -1  11   0    0.26    1.58
  -1 -11   0    0.53    1.34
   1 -11   0    1.00    1.23
   1  11   0    0.19    1.58
  -1  11  -1   -0.48    1.46
   1 -11   1    0.20    1.31
   1  11   1    1.15    1.56
  -1  11  -1    0.35    1.55
   1 -11   1   -0.49    1.66
   1  11   1   -0.90    2.16
   1  11   1   -0.08    1.46
   1 -11   2   11.99    2.14
  -1  11  -2   11.14    1.89
   1  11   2   13.69    1.70
  -1  11  -2   15.77    1.87
   1  11   2   16.66    2.04
   1  11   2   11.54    2.43
   1 -11   2   13.43    1.70
   1 -11   3   34.02    2.40
   1  11   3   46.54    3.27
  -1  11  -3   40.91    2.58
   1  11   3   36.86    2.25
  -1  11  -3   42.02    2.63
   1 -11   3   42.86    2.89
   1  11   3   37.86    2.61
   1  11   4    0.92    2.14
  -1  11  -4    0.99    1.73
   1  11   4    0.20    1.68
   1 -11   4   -2.90    1.56
  -1  11  -4    0.65    1.54
   1  11   4   -0.53    1.30
   1  11   5   88.70    3.80
   1 -11   5   82.94    3.59
  -1  11  -5   89.78    3.89
   1  11   5   88.21    4.40
   1  11   5   83.54    3.29
   1  11   6   64.87    3.32
  -1  11  -6   64.65    3.51
  -1  11  -6   62.90    3.01
   1  11   6   66.71    3.83
   1  11   6   59.47    2.83
   1 -11   6   67.09    3.31
   1  11   7   67.65    3.88
   1  11   7   71.93    2.97
  -1  11  -7   78.19    3.71
   1  11   7   71.32    3.51
  -1  11  -7   70.17    3.11
   1 -11   7   65.29    3.67
   1  11   8    1.97    1.40
   1 -11   8    2.37    2.08
  -1 -11  -8    3.78    0.64
   1  11   8    5.18    2.33
  -1  11  -8    5.16    2.10
  -1  11  -8    1.53    1.56
   1  11   9    1.03    1.42
  -1  11  -9   -0.82    1.48
  -1  11  -9    1.04    2.04
   1 -11   9    0.55    2.05
   1  11   9   -0.62    2.13
   1 -12  -8   32.41    1.43
  -1  12   8   29.53    2.45
  -1 -12   8   34.95    3.12
  -1  12   8   41.77    3.61
   1  12  -8   37.48    3.13
   1  12  -8   31.72    2.93
  -1  12   7    1.93    2.65
   1  12  -7    2.09    2.06
  -1 -12   7   -0.13    2.08
   1 -12  -7    0.83    0.95
  -1  12   7   -0.09    1.62
   1  12  -7   -2.45    2.16
   1  12  -6   14.37    2.49
  -1 -12   6    9.57    2.36
  -1  12   6    8.74    1.27
  -1  12   6   12.31    2.82
  -1  12   6    6.47    1.75
   1  12  -6    9.05    2.25
   1  12  -5    5.68    2.21
  -1  12   5    8.97    2.83
  -1 -12   5    3.82    2.05
  -1  12   5    8.49    1.36
   1  12  -5    7.77    2.05
  -1  12   5    4.58    1.74
   1  12  -4   26.60    2.95
   1  12  -4   26.18    2.59
  -1  12   4   26.39    3.26
  -1  12   4   26.00    2.27
  -1 -12   4   29.05    2.35
  -1  12   4   27.43    1.80
  -1  12   3  349.94    8.99
   1  12  -3  384.36   10.52
  -1 -12   3  376.13    9.59
  -1  12   3  357.53    9.58
   1  12  -3  356.38    9.88
  -1 -12   2   27.45    2.19
  -1  12   2   18.63    2.18
   1  12  -2   28.26    2.47
  -1  12   2   19.37    1.79
   1  12  -2   25.65    2.93
  -1 -12   1   76.65    3.18
   1  12  -1   73.08    3.41
   1  12  -1   70.63    4.12
   1  12  -1   71.90    3.46
  -1  12   1   76.06    3.10
  -1  12   1   77.88    3.46
   1  12   0    3.73    1.68
  -1  12   0    3.09    1.49
   1  12   0    3.81    1.86
  -1  12   0    4.61    1.63
   1 -12   0    3.49    1.30
   1  12   1    4.37    2.36
  -1  12  -1    4.09    1.61
   1  12   1    6.50    1.89
  -1  12  -1    3.98    1.70
   1 -12   1    6.48    1.94
   1  12   1    4.40    1.65
   1 -12   1    5.68    1.44
   1  12   2    2.56    2.40
  -1  12  -2    4.29    1.67
   1 -12   2    1.48    1.44
   1  12   2    1.55    1.71
   1 -12   2    3.48    1.98
   1  12   2    2.49    1.59
  -1  12  -2    3.40    1.74
   1  12   3   11.49    1.69
   1  12   3   11.63    2.09
   1 -12   3    8.76    1.74
  -1  12  -3   11.34    1.94
   1  12   3   10.12    2.56
   1 -12   3    9.90    2.23
   1  12   4   23.39    1.99
   1  12   4   24.89    2.48
   1 -12   4   22.32    2.48
  -1  12  -4   26.78    2.49
   1  12   4   29.21    3.18
   1 -12   4   25.28    2.25
  -1  12  -5   10.74    2.11
   1  12   5   11.16    2.67
   1  12   5    9.46    1.67
  -1  12  -6   96.65    4.31
   1  12   6   91.66    3.59
  -1  12  -7   54.92    3.33
   1  12   7   51.86    3.71
   1  12   7   43.72    2.50
  -1  12  -8  177.37    6.47
   1  12   8  211.74    6.99
   1  13  -6    0.55    2.43
  -1  13   6    5.99    2.98
   1  13  -6    5.01    2.18
  -1 -13   6    3.76    2.28
   1  13  -5  125.18    5.01
  -1 -13   5  112.92    5.04
   1  13  -5  122.19    5.26
  -1  13   4    5.25    2.88
   1  13  -4    1.08    1.93
   1  13  -4    2.01    2.55
  -1  13   4    0.92    1.29
   1  13  -3   49.99    3.17
  -1  13   3   54.82    4.22
  -1  13   3   51.69    2.54
   1  13  -3   52.90    3.78
  -1 -13   2    1.61    1.59
   1  13  -2    0.59    2.49
  -1  13   2    1.45    1.38
   1  13  -2   -1.66    1.85
   1  13  -1   71.31    4.34
  -1  13   1   75.17    3.17
   1  13  -1   74.22    3.55
  -1 -13   1   69.98    3.14
   1 -13   0   22.53    1.84
  -1  13   0   21.60    2.04
   1  13   0   17.59    2.20
   1  13   1   25.04    2.23
  -1  13  -1   24.33    2.22
   1 -13   1   24.01    2.44
   1 -13   1   24.69    1.96
   1 -13   2   58.85    2.83
   1  13   2   46.36    2.77
   1  13   2   48.48    3.76
   1 -13   2   62.05    3.45
  -1  13  -2   53.34    2.96
   1 -13   3    3.01    2.08
   1  13   3    7.16    2.58
  -1  13  -3    1.79    1.83
   1  13   3    2.59    1.58
   1 -13   3    1.41    1.56
  -1  13  -4    1.89    1.84
   1  13   4    5.38    2.72
   1 -13   4    2.09    2.07
   1  13   4    2.57    1.59
  -1  13  -5   51.64    3.21
   1  13   5   58.15    3.98
   1 -13   5   52.26    3.51
   1  13   5   48.81    2.71
  -1  13  -6   72.09    3.83
   1  13   6   74.69    3.21
   1  13   6   82.99    4.68
   1  14  -4    1.53    2.60
   1  14  -4   -0.38    2.09
   1  14  -3    5.93    2.05
  -1  14   3    8.99    3.07
   1  14  -3    7.17    2.73
   1  14  -2   39.53    2.93
  -1  14   2   41.11    2.43
   1  14  -2   41.62    3.72
  -1  14   2   44.93    4.06
  -1  14   1  112.64    4.17
   1  14  -1  117.34    5.51
  -1  14   1  117.90    5.77
   1  14  -1  116.34    4.61
   1  14   0   -0.21    1.81
  -1  14   0   -1.01    1.57
  -1  14  -1  112.09    4.27
   1 -14   1  112.93    3.95
   1  14   1  108.33    4.34
   1  14   2  253.34    7.38
   1 -14   2  256.85    7.93
  -1  14  -2  258.01    7.57
   1  14   2  257.11    8.68
   1  14   3  109.98    5.51
   1 -14   3  110.44    4.86
   1  14   3  104.35    4.14
  -1  14  -3  108.39    4.42
  -1  14  -4   20.15    2.55
   1 -14   4   18.28    2.61
   1  14   4   17.59    2.04
  -2   0  15   -1.01    1.58
  -2   0  14   14.52    1.19
  -2   0  14   14.45    1.81
  -2   0  13    0.87    1.38
  -2   0  13   -0.07    0.95
   2   0 -13    1.78    1.58
  -2   0  13   -0.29    1.57
  -2   0  12   54.94    2.88
  -2   0  12   57.59    2.62
   2   0 -12   57.00    2.71
  -2   0  12   53.24    2.01
  -2   0  11   -1.98    1.55
  -2   0  11   -0.91    1.25
   2   0 -11   -0.78    1.34
  -2   0  11    0.04    0.96
   2   0 -10    3.05    1.02
  -2   0  10    4.30    1.23
   2   0 -10    3.31    1.32
  -2   0  10    4.23    1.01
  -2   0  10    4.03    1.43
  -2   0   9   -0.15    1.00
   2   0  -9   -0.06    1.15
   2   0  -9    0.36    0.88
  -2   0   9    0.20    1.20
  -2   0   9    0.50    0.91
   2   0  -8   94.52    3.09
   2   0  -8   95.58    2.77
  -2   0   8   87.97    2.82
  -2   0   8   95.02    3.16
  -2   0   8   91.47    2.65
  -2   0   7    0.12    0.76
  -2   0   7   -0.20    0.92
   2   0  -7   -0.34    0.95
   2   0  -7    0.03    0.72
  -2   0   7   -0.22    0.70
  -2   0   6  504.20   11.11
   2   0  -6  504.97   11.43
  -2   0   6  498.22   11.46
  -2   0   6  493.77   11.18
   2   0  -6  531.40   11.13
  -2   0   5    0.05    0.68
  -2   0   5    0.21    0.92
   2   0  -5    0.56    0.91
  -2   0   5    0.17    0.79
   2   0  -5    0.60    0.66
   2   0  -4 6671.02  137.07
  -2   0   4 6495.42  137.16
  -2   0   4 6576.53  137.34
  -2   0   4 6654.06  137.13
  -2   0   3   -0.34    0.53
  -2   0   3    0.04    0.32
  -2   0   3    0.21    0.52
  -2   0   3    0.03    0.35
   2   0  -2 6130.86  127.98
  -2   0   2 6040.59  127.81
  -2   0   2 6203.95  127.93
  -2   0   2 6304.05  127.84
  -2   0   2 6183.05  127.97
  -2   0   1    0.74    0.44
  -2   0   1    0.07    0.50
   2   0  -1    0.66    0.49
   2   0   0 5050.37  105.54
  -2   0   0 5077.18  105.42
   2   0   0 5052.86  105.42
  -2   0   0 5177.23  105.55
   2   0   1    0.57    0.60
   2   0   1    0.26    0.39
   2   0   1    0.17    0.45
  -2   0  -1   -0.76    0.67
   2   0   2  611.48   13.32
  -2   0  -2  589.88   13.29
  -2   0  -3    0.22    0.57
   2   0   3   -0.09    0.64
   2   0   3    0.73    0.66
   2   0   3    0.18    0.71
   2   0   4  152.94    4.25
   2   0   4  154.55    4.06
  -2   0  -4  176.86    4.09
   2   0   4  168.03    4.27
   2   0   5    0.09    1.16
  -2   0  -5   -0.14    0.88
   2   0   5    0.24    0.91
   2   0   5    1.82    1.05
  -2   0  -5   -0.34    0.97
   2   0   6  967.60   20.22
   2   0   6  945.65   20.34
  -2   0  -6  890.14   19.91
   2   0   6  907.05   19.80
   2   0   7   -0.39    1.05
   2   0   7   -0.13    1.07
  -2   0  -7   -0.37    0.89
   2   0   7    0.42    0.85
   2   0   8  198.27    5.47
   2   0   8  192.55    4.91
   2   0   8  197.33    5.61
  -2   0  -8  202.25    5.12
  -2   0  -9   -0.93    1.16
   2   0   9    1.97    1.37
   2   0   9   -1.11    1.57
   2   0   9    0.19    1.01
  -2   0 -10  187.82    5.02
   2   0  10  180.60    5.64
   2   0  10  179.53    4.70
   2   0  11    0.41    1.04
   2   0  11    0.87    1.70
   2   0  11   -0.08    1.43
  -2   0 -11    1.35    1.28
   2   0  12  234.88    7.08
   2   0  12  241.74    6.93
   2   0  12  240.92    5.95
   2   0  12  234.53    5.53
  -2   0 -12  258.87    6.39
  -2   0 -13    1.06    1.34
   2   0  13   -1.38    1.59
   2   0  13    0.13    1.09
   2   0  14    3.08    1.81
  -2   0 -14    5.14    1.54
  -2   1  15    4.17    1.65
  -2  -1  15    5.22    1.78
  -2   1  14   28.18    2.37
  -2  -1  14   29.09    1.64
  -2   1  14   32.40    2.23
  -2  -1  14   33.34    2.33
   2   1 -14   30.51    2.35
  -2   1  13    1.04    1.33
  -2  -1  13    2.07    1.15
  -2   1  13    0.37    1.65
   2   1 -13    0.81    1.62
  -2  -1  13    1.43    1.44
  -2   1  13    1.58    0.89
  -2  -1  13    0.30    1.70
  -2  -1  12    1.42    1.56
  -2   1  12    1.37    1.52
  -2   1  12    2.06    0.86
   2   1 -12    2.47    1.23
   2   1 -12    2.54    1.53
  -2   1  12    0.47    1.22
  -2  -1  12    3.13    1.23
  -2  -1  12    2.93    1.43
  -2   1  11  135.94    4.38
  -2  -1  11  130.39    3.75
  -2   1  11  129.56    4.01
  -2  -1  11  130.31    4.54
  -2   1  11  136.11    3.47
   2   1 -11  128.84    4.39
   2  -1 -11  133.41    4.11
  -2  -1  11  127.58    4.17
  -2   1  10   11.78    1.31
  -2  -1  10   11.15    1.66
  -2   1  10   10.27    1.00
   2   1 -10   11.44    1.60
  -2  -1  10   10.43    1.41
  -2  -1  10    9.63    1.27
   2  -1 -10   13.30    1.49
   2   1 -10   10.76    1.33
  -2   1  10    9.49    1.47
  -2  -1   9  269.53    6.79
  -2   1   9  263.07    6.59
  -2   1   9  268.27    6.89
  -2   1   9  280.65    6.21
   2   1  -9  253.64    6.99
  -2  -1   9  271.98    6.51
   2   1  -9  259.83    6.58
  -2  -1   9  261.82    7.09
   2  -1  -9  268.87    6.72
  -2   1   8   40.77    1.10
   2  -1  -8   42.19    1.85
  -2  -1   8   42.10    1.90
  -2   1   8   44.12    1.75
  -2   1   8   42.56    1.98
  -2  -1   8   40.47    2.08
   2   1  -8   42.17    2.10
  -2   1   8   45.86    1.52
  -2  -1   8   46.42    1.83
   2   1  -8   43.52    1.83
  -2  -1   7  384.19    8.80
  -2   1   7  395.66    8.37
  -2  -1   7  384.30    9.08
  -2   1   7  388.86    8.87
   2   1  -7  382.92    8.65
   2  -1  -7  397.21    8.78
   2   1  -7  362.63    8.99
  -2  -1   7  374.20    8.65
  -2   1   7  359.49    8.04
  -2   1   7  391.98    8.59
   2   1  -6 1687.96   37.59
  -2   1   6 1787.33   37.14
  -2  -1   6 1766.20   37.36
   2  -1  -6 1788.54   37.32
  -2   1   6 1818.94   37.41
  -2  -1   6 1757.95   37.62
  -2  -1   6 1735.58   37.29
   2   1  -6 1770.90   37.25
  -2   1   6 1740.48   36.81
  -2   1   6 1800.36   37.01
  -2   1   5   92.49    2.61
  -2  -1   5   89.58    2.61
  -2  -1   5   92.50    2.83
  -2  -1   5   88.80    2.65
   2  -1  -5   93.52    2.57
   2   1  -5   93.48    2.54
  -2   1   5   87.30    2.27
  -2   1   5   89.92    2.38
  -2   1   5   92.45    2.36
  -2   1   4   11.98    0.63
  -2   1   4   10.17    0.77
  -2  -1   4   11.26    1.01
   2  -1  -4   12.02    0.79
  -2  -1   4   11.41    0.97
   2   1  -4   12.94    0.81
  -2  -1   4   11.68    0.86
  -2   1   4   12.38    0.70
  -2   1   3 4875.38   99.46
  -2  -1   3 4729.82   99.70
  -2  -1   3 4816.12   99.41
  -2   1   3 4779.21   99.50
  -2   1   3 4755.64   99.50
  -2  -1   3 4797.88   99.79
   2   1  -3 4791.73   99.35
  -2  -1   3 4676.96   99.63
  -2   1   3 4816.39   99.33
  -2   1   2  400.99    8.35
  -2  -1   2  393.85    8.54
  -2  -1   2  388.54    8.59
  -2   1   2  402.52    8.46
  -2  -1   2  392.16    8.66
  -2  -1   2  394.24    8.46
  -2   1   2  386.65    8.44
   2  -1  -2  385.82    8.44
  -2  -1   1 2319.68   46.66
   2   1  -1 2186.09   46.63
   2  -1  -1 2225.23   46.51
  -2   1   1 2206.77   46.55
   2   1  -1 2230.98   46.70
   2  -1  -1 2193.11   46.59
  -2  -1   1 2278.58   46.60
  -2   1   1 2270.41   46.53
  -2  -1   1 2207.40   46.60
  -2  -1   0  177.80    4.08
  -2   1   0  170.73    3.87
   2   1   0  171.46    3.92
   2  -1   0  167.61    3.99
  -2   1   0  178.04    3.98
  -2  -1   0  179.39    3.88
   2  -1   1 2426.27   49.96
  -2   1  -1 2402.16   49.87
   2   1   1 2350.08   49.71
   2   1   1 2443.12   50.00
  -2  -1  -1 2379.20   50.01
   2  -1   1 2396.53   49.90
  -2   1  -1 2461.93   49.94
   2  -1   1 2333.56   49.88
  -2  -1  -2   10.42    0.88
   2  -1   2   11.13    0.79
   2   1   2    9.94    0.84
  -2   1  -2   11.36    0.75
   2   1   2   11.31    0.45
  -2   1  -2   12.09    0.86
   2  -1   2   10.62    0.86
   2  -1   2   12.14    0.80
   2  -1   3 5430.58  116.91
  -2   1  -3 5993.24  116.84
   2  -1   3 5818.44  116.70
   2   1   3 5508.67  116.76
   2   1   3 5875.21  116.72
   2  -1   3 5672.21  116.85
   2   1   3 5470.31  116.27
  -2   1  -3 5639.46  116.84
  -2   1  -4  196.42    4.61
   2   1   4  170.33    4.47
   2   1   4  194.48    4.57
   2  -1   4  177.13    4.66
  -2   1  -4  178.83    4.62
   2  -1   4  182.12    4.40
   2   1   4  179.94    4.60
   2  -1   4  179.68    4.73
   2   1   5   17.09    1.26
  -2   1  -5   14.24    1.27
   2  -1   5   14.20    1.37
  -2  -1  -5   15.24    1.29
   2  -1   5   14.87    1.08
   2   1   5   14.79    1.31
   2  -1   5   15.36    1.48
  -2   1  -5   15.37    1.36
  -2   1  -5   15.03    1.18
   2   1   5   13.21    1.23
  -2  -1  -6  831.10   18.86
   2  -1   6  875.44   19.11
  -2   1  -6  903.28   19.01
   2   1   6  874.00   19.13
  -2   1  -6  856.49   18.76
   2  -1   6  852.81   19.24
  -2   1  -6  907.18   19.17
   2  -1   6  852.79   18.66
   2   1   6  877.74   19.06
   2   1   7   90.68    3.16
  -2   1  -7   92.98    2.82
   2   1   7   86.28    3.03
   2  -1   7   92.20    3.18
   2  -1   7   96.17    3.29
  -2   1  -7   98.53    3.22
   2   1   7   93.77    2.79
   2  -1   7   92.09    2.71
  -2  -1  -7   96.84    2.98
   2  -1   8  108.33    3.61
   2  -1   8  105.37    3.73
   2  -1   8  101.14    2.98
   2   1   8  106.73    3.47
   2   1   8  100.79    3.04
  -2   1  -8  100.17    3.08
   2   1   8  105.11    3.59
  -2  -1  -8  104.74    3.28
   2  -1   9 1371.82   30.09
   2  -1   9 1314.50   29.03
  -2   1  -9 1405.32   29.22
   2   1   9 1384.42   29.93
   2   1   9 1375.28   29.68
  -2  -1  -9 1379.14   29.41
   2   1   9 1320.25   29.08
   2  -1   9 1394.49   29.88
  -2   1 -10  945.32   20.05
   2  -1  10  896.23   20.96
  -2  -1 -10  924.17   20.23
   2   1  10  897.48   20.56
  -2   1 -10  900.67   20.27
   2   1  10  953.64   20.86
   2   1  10  886.93   19.85
   2  -1  10  919.79   19.86
   2  -1  10  921.69   20.76
   2   1  10  911.61   19.23
  -2   1 -11   55.08    2.38
   2  -1  11   60.97    3.20
   2   1  11   59.99    3.09
   2   1  11   60.42    2.89
  -2  -1 -11   56.63    2.55
   2  -1  11   59.72    2.24
   2  -1  11   59.94    2.99
   2   1  11   56.37    2.20
   2   1  11   58.13    1.53
   2   1  12   74.21    3.39
   2   1  12   60.62    2.98
   2  -1  12   66.44    2.38
   2   1  12   59.40    2.26
   2  -1  12   64.17    3.48
   2   1  12   58.27    1.50
   2  -1  12   64.63    3.19
  -2  -1 -12   65.78    2.73
  -2   1 -12   69.45    2.60
   2  -1  13   85.96    2.64
   2  -1  13   85.23    3.82
  -2  -1 -13   90.82    3.33
   2  -1  13   86.04    2.85
   2   1  13   87.62    3.68
  -2   1 -13   93.79    3.18
  -2   1 -14    0.78    1.43
   2   1  14    1.65    1.77
   2  -1  14    1.86    1.75
   2   2 -14    8.90    1.54
   2   2 -14    4.98    1.83
  -2  -2  14    8.33    1.41
  -2   2  14   10.90    1.61
  -2  -2  14    7.51    1.88
  -2   2  14   10.51    1.91
  -2  -2  13   88.42    3.92
  -2   2  13   89.37    3.67
  -2  -2  13   85.92    3.09
  -2   2  13   95.80    2.59
   2   2 -13   88.30    3.28
   2   2 -13   83.13    3.72
  -2   2  13   89.26    3.31
  -2  -2  13   94.58    3.70
  -2   2  12   65.78    2.03
   2   2 -12   62.66    2.69
  -2   2  12   61.16    2.60
  -2  -2  12   65.80    3.00
   2   2 -12   62.46    3.17
  -2  -2  12   66.90    3.21
  -2   2  12   61.91    2.88
  -2  -2  12   61.88    2.56
   2   2 -11    9.17    1.74
  -2  -2  11    8.53    1.58
  -2   2  11    8.78    0.61
   2   2 -11    9.90    1.46
  -2  -2  11    9.28    1.83
  -2   2  11    8.85    1.34
  -2   2  11    9.24    1.52
  -2   2  11    9.80    0.94
  -2  -2  11    9.15    1.44
  -2   2  10   18.42    0.88
  -2   2  10   20.89    1.50
  -2  -2  10   23.04    1.98
   2   2 -10   20.33    1.63
  -2   2  10   22.90    1.16
  -2   2  10   20.99    1.69
  -2  -2  10   20.94    1.78
   2   2 -10   22.17    2.03
  -2  -2  10   20.12    1.66
   2   2  -9   -0.15    1.36
  -2  -2   9    0.34    1.18
  -2  -2   9    1.06    1.34
  -2   2   9   -0.40    0.91
  -2  -2   9   -0.44    1.17
  -2   2   9    0.51    1.07
   2   2  -9    0.26    1.08
  -2   2   9    0.12    0.76
  -2   2   9    0.55    0.63
  -2   2   8   82.45    2.19
   2   2  -8   72.95    2.95
  -2   2   8   74.98    2.10
  -2  -2   8   79.90    2.77
  -2   2   8   80.08    2.66
  -2  -2   8   73.85    2.96
   2   2  -8   71.31    2.56
  -2   2   8   77.86    2.45
   2  -2  -8   77.00    2.47
  -2   2   7    4.17    0.67
   2   2  -7    4.61    0.93
  -2   2   7    3.20    0.82
  -2   2   7    4.21    0.72
   2  -2  -7    4.32    0.79
  -2  -2   7    3.11    0.98
  -2   2   7    3.58    0.79
  -2  -2   7    2.02    1.13
  -2   2   6  345.08    7.74
  -2   2   6  354.59    7.93
   2  -2  -6  355.63    7.81
  -2   2   6  362.15    7.63
  -2  -2   6  337.01    8.35
  -2  -2   6  345.61    8.15
   2   2  -6  347.44    8.02
   2  -2  -6  331.59    7.76
  -2   2   6  331.32    7.74
   2   2  -5  241.89    5.80
  -2  -2   5  242.53    5.92
   2   2  -5  235.23    5.24
   2  -2  -5  244.66    5.52
   2  -2  -5  246.99    5.54
  -2   2   5  253.21    5.48
  -2   2   5  247.12    5.48
  -2  -2   5  245.20    6.10
  -2   2   5  238.90    5.60
   2   2  -4  839.42   18.03
  -2   2   4  867.60   18.03
   2  -2  -4  870.41   18.06
  -2   2   4  875.85   18.15
  -2   2   4  839.14   18.13
  -2  -2   4  859.28   18.51
   2  -2  -4  853.85   18.13
  -2  -2   4  848.32   18.63
   2   2  -3    0.43    0.75
  -2  -2   3   -0.03    0.63
   2   2  -3    0.60    0.51
   2  -2  -3    0.53    0.27
  -2  -2   3    0.07    0.71
  -2   2   3    0.75    0.30
  -2  -2   2   84.02    2.27
   2   2  -2   82.24    2.28
  -2  -2   2   74.87    2.17
  -2   2   2   71.98    1.76
  -2  -2   2   79.08    2.13
  -2  -2   1   13.00    0.89
  -2   2   1   12.23    0.82
  -2  -2   1   10.26    0.90
  -2   2   1   11.48    0.53
   2   2  -1   12.87    0.90
  -2   2   0  429.98    9.37
  -2   2   0  436.77    9.58
   2   2   0  447.19    9.67
  -2   2   0  442.93    9.42
   2   2   0  443.65    9.63
  -2   2  -1    2.68    0.56
  -2   2  -1    3.44    0.60
   2  -2   1    2.37    0.66
   2   2   1    2.93    0.73
  -2  -2  -1    2.60    0.83
  -2   2  -1    3.20    0.66
  -2   2  -2 2170.78   44.73
   2   2   2 2124.80   44.83
  -2  -2  -2 2108.60   44.30
  -2  -2  -2 2178.79   44.91
   2  -2   2 2127.91   44.76
   2  -2   2 2134.46   44.72
  -2   2  -2 2142.67   44.77
  -2   2  -2 2147.83   44.66
   2   2   3   55.00    1.94
   2  -2   3   56.39    2.03
  -2   2  -3   56.29    1.90
  -2   2  -3   59.62    2.01
   2  -2   3   56.53    1.91
   2  -2   3   56.80    1.81
   2  -2   4 1090.68   23.91
   2  -2   4 1099.64   23.83
  -2   2  -4 1112.73   23.89
  -2   2  -4 1163.62   23.77
   2   2   4 1112.89   23.71
   2  -2   4 1069.92   23.55
  -2  -2  -5 2109.43   45.27
   2  -2   5 2053.27   45.28
  -2   2  -5 2185.16   45.41
   2  -2   5 2105.56   45.43
  -2   2  -5 2259.42   45.25
   2   2   5 2194.88   45.12
   2   2   5 2150.54   45.13
   2  -2   5 2111.89   44.96
  -2   2  -5 2093.15   44.93
  -2   2  -6  190.28    4.97
   2   2   6  181.20    4.83
   2   2   6  189.26    4.97
   2  -2   6  187.20    5.21
  -2  -2  -6  179.00    4.93
  -2   2  -6  184.26    4.66
   2  -2   6  184.46    4.65
  -2   2  -6  201.66    5.17
   2   2   6  192.96    4.82
   2  -2   6  182.93    5.05
   2   2   7  166.52    4.74
   2  -2   7  170.99    4.40
   2  -2   7  168.93    5.07
  -2   2  -7  175.62    4.43
  -2   2  -7  179.07    4.96
   2   2   7  174.76    4.52
  -2  -2  -7  170.24    4.72
   2  -2   7  169.13    4.86
   2   2   7  167.78    4.66
  -2   2  -8  410.24    9.30
   2  -2   8  403.59   10.08
   2  -2   8  396.20    9.86
   2   2   8  388.17    9.58
   2   2   8  398.31    9.33
  -2  -2  -8  413.49    9.65
  -2   2  -8  413.18    9.92
   2  -2   8  396.42    9.26
   2   2   8  410.14    9.83
   2   2   9  715.96   16.32
   2  -2   9  694.94   15.83
   2  -2   9  712.33   16.79
  -2   2  -9  734.26   15.88
   2  -2   9  740.75   16.61
   2   2   9  733.10   16.55
  -2  -2  -9  718.88   16.24
   2   2   9  708.19   15.89
  -2   2 -10  202.11    5.29
   2   2  10  191.63    5.68
   2  -2  10  211.37    5.31
   2   2  10  215.85    6.06
   2   2  10  201.58    5.29
  -2   2 -10  201.95    5.69
   2  -2  10  218.23    6.37
  -2  -2 -10  193.02    5.60
   2  -2  10  209.25    6.05
   2  -2  11   17.20    2.03
   2   2  11   17.99    1.49
   2  -2  11   16.44    1.48
  -2  -2 -11   17.22    1.80
   2   2  11   18.03    1.97
  -2   2 -11   17.16    1.48
   2  -2  11   17.04    2.21
   2   2  11   18.50    1.91
  -2   2 -12   19.01    1.59
   2  -2  12   20.22    2.19
   2   2  12   16.32    1.43
   2   2  12   22.15    2.19
  -2  -2 -12   17.75    1.85
  -2   2 -12   19.31    1.80
   2   2  12   22.97    2.10
   2   2  13  118.32    4.37
   2   2  13  112.59    3.46
   2  -2  13  121.01    4.62
  -2   2 -13  124.99    3.76
   2  -2  14   16.51    2.36
   2   2  14   14.74    2.14
  -2   2 -14   15.66    1.66
   2   3 -14    9.39    2.13
  -2   3  14    9.32    1.54
  -2  -3  14    9.89    1.95
  -2  -3  14    7.82    1.67
  -2   3  13   67.99    2.77
  -2   3  13   64.97    3.00
  -2  -3  13   69.18    2.88
   2   3 -13   63.87    2.91
  -2  -3  13   64.08    3.18
   2   3 -13   66.24    3.45
   2   3 -12    5.67    1.56
  -2   3  12    4.81    0.75
   2   3 -12    8.89    1.99
  -2  -3  12    4.83    1.70
  -2   3  12    6.55    1.31
  -2  -3  12    7.96    1.94
  -2   3  12    5.57    1.49
  -2  -3  12    7.77    1.60
  -2   3  11   71.98    2.16
  -2   3  11   81.39    2.82
   2   3 -11   73.98    2.99
  -2  -3  11   75.27    3.49
  -2  -3  11   77.98    3.24
   2   3 -11   79.78    3.56
  -2   3  11   81.75    3.07
  -2  -3  11   78.89    2.99
  -2   3  10  116.72    3.72
  -2   3  10  117.36    3.52
  -2   3  10  110.23    3.04
  -2  -3  10  116.03    4.18
  -2  -3  10  116.09    3.99
   2   3 -10  111.54    4.20
   2   3 -10  122.38    3.81
  -2   3  10  123.52    3.07
  -2   3   9   12.59    1.26
  -2   3   9   12.20    1.19
  -2   3   9   13.18    1.04
   2   3  -9   11.66    1.74
   2   3  -9   15.23    1.49
  -2  -3   9   11.26    1.77
  -2  -3   9   14.06    1.57
  -2   3   9   14.33    0.96
  -2   3   8  286.03    6.61
  -2   3   8  295.87    6.89
   2   3  -8  272.33    7.01
  -2  -3   8  279.36    7.43
  -2   3   8  269.60    6.66
  -2   3   8  290.13    6.41
  -2  -3   8  273.52    7.20
  -2   3   7    8.94    0.86
   2   3  -7    7.14    0.57
   2   3  -7    8.89    1.14
   2   3  -7    8.88    0.51
  -2   3   7    8.45    0.97
  -2   3   7    8.74    0.97
   2  -3  -7    7.90    0.87
  -2  -3   7    7.23    1.29
  -2  -3   7    7.81    1.22
   2   3  -6   12.07    1.12
  -2  -3   6   11.06    1.29
  -2   3   6   12.68    0.84
  -2   3   6   11.02    1.10
  -2  -3   6   12.24    1.37
   2   3  -6   11.33    0.76
   2   3  -6   11.17    0.65
  -2   3   6   12.26    0.93
   2  -3  -6   12.32    0.86
  -2  -3   5  563.27   12.61
  -2   3   5  550.95   11.90
  -2   3   5  539.93   11.82
  -2  -3   5  565.25   12.51
   2  -3  -5  546.68   11.85
   2   3  -5  567.64   12.36
   2   3  -5  554.90   11.92
  -2  -3   4  441.03   10.22
   2   3  -4  449.30   10.39
   2  -3  -4  452.09    9.68
  -2   3   4  443.48    9.57
  -2  -3   4  454.30   10.34
   2   3  -4  451.24    9.85
  -2  -3   3 1129.33   24.07
  -2  -3   3 1117.12   24.01
   2   3  -3 1121.33   24.14
  -2   3   3 1106.28   23.55
   2   3  -3 1132.55   23.79
  -2  -3   2    0.14    0.75
  -2   3   2    0.18    0.46
  -2  -3   2    0.80    0.76
   2   3  -2    1.03    0.76
  -2  -3   1  556.20   12.26
  -2  -3   1  552.58   12.30
   2   3  -1  556.73   12.28
  -2  -3   1  557.11   12.23
   2   3  -1  554.26   12.27
   2  -3  -1  565.79   11.74
  -2   3   1  557.27   11.73
  -2   3   1  539.66   11.91
   2   3   0  378.49    8.42
  -2  -3   0  349.95    8.53
  -2   3   0  372.42    8.11
  -2  -3   0  373.39    8.35
  -2   3   0  377.38    8.20
   2   3   0  373.79    8.43
   2   3   0  376.03    8.49
   2   3   1    4.38    0.95
  -2   3  -1    4.75    0.69
  -2   3  -1    7.38    0.73
  -2  -3  -1    6.92    1.05
  -2   3  -1    5.99    0.79
   2   3   1    5.27    0.78
  -2   3  -2  147.77    3.74
   2   3   2  142.73    3.87
  -2   3  -2  144.77    3.70
  -2   3  -2  141.93    3.66
  -2  -3  -2  146.83    4.01
   2   3   3   64.22    2.29
  -2  -3  -3   62.80    1.48
  -2   3  -3   60.39    2.24
   2  -3   3   55.67    2.18
  -2   3  -3   60.38    2.13
  -2   3  -4   10.84    1.36
   2  -3   4   10.95    1.22
   2   3   4   10.05    1.27
  -2   3  -4    9.40    1.06
  -2   3  -4    9.38    1.17
  -2  -3  -5    0.06    1.19
   2   3   5    0.96    1.03
   2  -3   5    0.23    1.18
  -2   3  -5   -0.13    0.92
  -2   3  -5    0.09    1.10
  -2   3  -5    0.56    1.13
   2  -3   5    0.87    0.92
   2  -3   5    0.67    1.11
  -2  -3  -6  113.23    3.65
  -2   3  -6  103.62    3.46
   2   3   6  124.23    3.47
   2  -3   6  112.06    3.60
   2  -3   6  116.96    3.34
  -2   3  -6  129.23    3.79
   2   3   6  113.24    3.29
   2   3   6  116.50    3.44
  -2   3  -6  116.15    3.21
   2  -3   6  114.86    3.82
   2  -3   7   12.98    1.61
  -2  -3  -7   14.06    1.53
  -2   3  -7   13.84    1.38
  -2   3  -7   12.92    1.20
   2   3   7   13.71    1.33
  -2   3  -7   12.21    1.51
   2   3   7   11.34    1.26
   2  -3   7   12.39    1.19
   2  -3   7   13.11    1.44
   2   3   8    6.37    1.25
   2  -3   8    8.16    1.43
   2  -3   8    7.87    1.65
  -2   3  -8   10.93    1.64
   2   3   8    8.41    1.35
   2   3   8    8.95    1.45
  -2  -3  -8   10.24    1.55
  -2   3  -8   10.88    1.24
  -2  -3  -9  634.61   14.94
  -2   3  -9  652.47   14.45
   2  -3   9  655.82   15.28
   2   3   9  648.09   14.61
  -2   3  -9  657.68   15.28
   2  -3   9  670.07   15.53
   2   3   9  620.19   14.84
   2   3   9  665.23   15.07
  -2   3 -10   26.93    2.12
  -2   3 -10   29.69    1.72
   2   3  10   28.45    2.10
   2   3  10   29.97    1.82
   2  -3  10   32.49    2.49
   2  -3  10   28.68    2.30
  -2  -3 -10   30.96    2.13
   2   3  10   28.73    2.21
  -2   3 -11   19.57    1.53
  -2  -3 -11   20.66    2.01
   2   3  11   19.41    1.88
   2   3  11   19.81    1.62
  -2   3 -11   20.26    2.01
   2  -3  11   20.11    2.23
   2  -3  11   21.78    2.14
   2   3  11   20.89    2.04
   2   3  12    4.13    1.63
   2   3  12    3.94    1.75
   2  -3  12    6.76    1.94
  -2   3 -12    7.80    1.32
   2   3  13    5.19    1.37
   2   3  13    5.62    1.80
  -2   3 -13    5.89    1.36
   2  -3  13    4.98    1.88
  -2   3 -14   67.43    2.72
   2  -3  14   68.09    3.59
   2   3  14   65.42    3.37
  -2   4  14    9.92    1.51
  -2  -4  14   11.48    1.90
  -2  -4  14   13.30    2.14
   2   4 -14   11.95    2.26
   2   4 -13   35.18    2.32
  -2  -4  13   36.88    2.73
  -2  -4  13   42.02    2.51
  -2   4  13   38.06    2.27
   2   4 -13   33.64    2.77
  -2   4  13   38.34    2.13
  -2   4  12   15.72    1.66
   2   4 -12   13.11    1.75
  -2   4  12   13.89    1.48
   2   4 -12   13.82    2.14
  -2   4  12   12.25    1.07
  -2  -4  12   12.08    1.92
   2   4 -11    3.56    1.74
  -2   4  11    4.09    1.21
  -2   4  11    3.01    1.28
   2   4 -11    0.43    1.45
  -2  -4  11    1.01    1.70
  -2  -4  11    2.27    1.56
  -2   4  11    2.00    0.91
  -2   4  10    9.10    1.23
  -2   4  10    9.79    1.09
   2   4 -10    8.26    1.51
   2   4 -10   12.03    1.85
  -2  -4  10    9.48    1.80
  -2  -4  10   10.81    1.73
  -2   4  10    9.19    1.32
   2   4  -9  121.85    3.75
  -2  -4   9  113.81    4.12
  -2  -4   9  119.42    4.00
  -2   4   9  119.84    3.35
  -2   4   9  120.50    3.35
  -2   4   9  123.48    3.48
  -2   4   8   14.61    1.15
   2   4  -8   14.44    0.77
  -2  -4   8   13.41    1.60
   2   4  -8   14.32    1.50
  -2   4   8   13.55    1.26
  -2   4   8   14.34    1.21
   2   4  -8   11.71    0.88
  -2  -4   8   16.89    1.86
   2  -4  -8   14.41    1.05
  -2   4   7  330.06    7.91
  -2   4   7  335.05    7.57
  -2  -4   7  326.42    8.41
   2   4  -7  339.03    7.30
   2   4  -7  320.74    7.45
  -2  -4   7  341.88    8.33
  -2   4   7  343.40    7.64
   2  -4  -7  323.23    7.39
   2   4  -7  319.33    8.04
  -2  -4   6  629.32   14.24
   2   4  -6  632.65   14.04
   2   4  -6  604.62   14.37
  -2   4   6  635.31   14.04
   2   4  -6  617.21   13.58
  -2  -4   6  624.34   14.34
   2  -4  -6  607.26   13.35
  -2   4   6  640.66   13.49
   2   4  -5 1764.53   37.90
   2  -4  -5 1787.39   37.59
   2   4  -5 1832.97   38.58
  -2  -4   5 1761.73   38.38
  -2   4   5 1817.26   37.57
  -2  -4   5 1808.79   38.48
  -2   4   4  230.90    5.03
  -2  -4   4  227.33    5.93
  -2   4   4  229.42    5.36
  -2  -4   4  226.33    5.91
   2   4  -4  229.25    5.99
   2   4  -4  233.64    5.61
   2  -4  -4  230.93    5.25
  -2  -4   3  741.06   16.49
   2   4  -3  738.67   16.32
   2   4  -3  745.62   16.57
  -2   4   3  750.27   16.03
  -2  -4   3  753.67   16.49
   2   4  -2  249.35    6.06
   2  -4  -2  249.22    5.58
  -2   4   2  237.34    5.22
  -2  -4   2  239.21    5.93
   2   4  -2  238.77    5.98
  -2  -4   2  253.28    6.07
  -2   4   2  240.27    5.59
   2  -4  -1   25.64    0.92
  -2  -4   1   23.59    1.40
  -2   4   1   24.68    0.94
  -2  -4   1   26.63    1.40
  -2   4   1   24.33    1.15
   2   4  -1   25.86    1.43
   2  -4  -1   24.64    1.21
   2   4  -1   22.15    1.43
   2   4   0 2824.47   59.79
  -2  -4   0 2812.46   59.69
   2   4   0 2864.17   59.86
  -2   4   0 2842.42   59.45
  -2   4   0 2837.04   59.58
   2  -4   0 2905.72   59.46
   2   4   0 2823.99   59.93
  -2   4  -1 2100.34   43.90
   2  -4   1 2096.49   43.87
  -2   4  -1 2059.31   43.85
   2   4   1 2118.67   44.23
   2   4   1 2076.02   43.99
  -2  -4  -1 2071.84   44.31
   2   4   2    8.68    1.05
  -2   4  -2    8.92    1.17
   2   4   2    7.99    1.39
  -2  -4  -2    7.58    1.46
  -2   4  -2    8.27    1.08
   2  -4   3 1965.84   43.05
  -2   4  -3 2042.39   42.96
   2   4   3 2069.96   43.17
  -2   4  -3 2046.82   43.07
   2   4   4 1177.77   25.74
  -2   4  -4 1212.29   25.83
  -2   4  -4 1163.86   25.63
  -2   4  -4 1167.70   25.39
   2  -4   4 1169.58   25.74
  -2  -4  -4 1196.56   24.74
  -2   4  -5   16.70    1.36
  -2  -4  -5   16.46    1.63
   2  -4   5   15.45    1.44
  -2   4  -5   19.91    1.60
   2   4   5   16.44    1.44
  -2   4  -5   16.87    1.20
   2   4   6  294.23    7.12
  -2   4  -6  290.60    7.39
  -2  -4  -6  289.77    7.39
   2  -4   6  281.71    7.42
  -2   4  -6  275.72    7.13
   2  -4   6  288.26    7.30
  -2   4  -6  277.93    6.74
   2  -4   7 1447.27   31.60
   2   4   7 1491.93   31.21
   2  -4   7 1485.78   31.79
  -2   4  -7 1422.98   31.34
   2   4   7 1412.02   31.06
  -2  -4  -7 1433.25   31.56
  -2   4  -7 1432.04   30.90
  -2   4  -7 1465.50   31.71
   2   4   7 1473.97   31.28
   2  -4   8  668.06   15.45
   2   4   8  662.74   14.97
   2   4   8  656.85   14.96
  -2   4  -8  659.88   15.47
   2   4   8  674.34   15.07
   2  -4   8  672.48   15.61
  -2   4  -8  642.10   14.61
  -2  -4  -8  663.69   15.34
  -2   4  -9 2385.22   51.08
  -2   4  -9 2319.97   50.08
   2  -4   9 2414.99   51.26
  -2  -4  -9 2362.76   50.81
   2   4   9 2414.32   50.69
   2   4   9 2379.48   50.42
   2  -4   9 2371.05   51.07
  -2   4 -10    6.54    1.27
  -2   4 -10    5.75    1.88
   2   4  10    6.88    1.66
   2   4  10    9.25    1.68
   2   4  10    7.72    1.50
   2  -4  10    8.29    2.00
   2  -4  10   10.84    1.92
  -2   4 -11  262.85    7.27
  -2   4 -11  264.16    7.60
   2   4  11  260.06    7.26
   2   4  11  262.76    6.78
  -2   4 -11  262.04    6.56
   2  -4  11  262.06    7.64
   2   4  11  266.48    7.20
   2   4  12   13.57    1.58
   2  -4  12   13.72    2.23
   2   4  12   12.19    1.91
   2   4  12   13.70    1.93
  -2   4 -12   13.16    1.46
   2   4  13   63.54    2.60
   2   4  13   62.41    3.17
   2  -4  13   65.28    3.50
  -2   4 -13   67.74    2.58
   2   5 -14    4.65    2.17
  -2  -5  14    0.70    1.94
  -2  -5  14    4.07    2.07
   2   5 -13   21.20    2.42
  -2  -5  13   21.94    2.34
  -2   5  13   23.01    1.79
  -2   5  12    0.95    1.00
   2   5 -12   -1.72    1.77
  -2   5  12    0.26    1.29
  -2  -5  12    0.52    1.71
   2   5 -12   -0.32    1.58
  -2   5  12    1.25    1.20
  -2   5  11    2.09    1.29
   2   5 -11    1.22    1.49
  -2   5  11    2.20    1.17
  -2   5  11    3.08    1.08
   2   5 -11    1.61    1.81
  -2  -5  11    1.79    1.82
  -2  -5  11    0.59    1.58
  -2   5  10    1.64    1.09
   2   5 -10    1.45    0.61
  -2  -5  10   -0.92    1.61
  -2  -5  10    0.10    1.60
   2   5 -10   -0.51    1.39
  -2   5  10    0.30    1.09
   2   5 -10    0.24    0.70
  -2   5  10   -0.59    1.08
  -2  -5   9    3.02    1.60
  -2   5   9    2.42    1.04
   2   5  -9    2.65    0.86
  -2   5   9    2.93    1.02
  -2  -5   9    2.15    1.54
   2   5  -9    3.91    0.71
   2   5  -9    5.04    1.42
  -2   5   9    3.57    1.21
   2   5  -8   25.05    1.12
  -2   5   8   21.68    1.68
  -2  -5   8   23.26    2.07
   2   5  -8   22.27    1.78
  -2   5   8   24.63    1.37
   2  -5  -8   24.62    1.20
  -2   5   8   25.81    1.39
   2   5  -8   22.40    1.35
  -2  -5   8   25.45    2.01
   2   5  -7  100.40    3.36
   2   5  -7   98.16    2.97
   2   5  -7   98.47    3.69
  -2   5   7  107.13    2.82
  -2   5   7   98.86    3.39
  -2  -5   7   99.43    3.73
  -2  -5   7  103.83    3.63
  -2   5   7  101.36    2.79
   2  -5  -7   97.96    2.62
   2   5  -6  270.70    7.42
   2   5  -6  282.83    6.81
   2  -5  -6  275.46    6.33
  -2   5   6  291.64    6.41
   2   5  -6  287.22    7.14
  -2  -5   6  289.13    7.35
  -2  -5   6  283.03    7.39
  -2  -5   5   17.54    1.58
   2  -5  -5   20.18    0.97
  -2  -5   5   20.51    1.71
   2   5  -5   18.94    1.62
  -2   5   5   19.14    0.79
   2   5  -5   17.20    1.35
  -2   5   5   18.11    1.12
  -2   5   5   19.56    0.84
  -2  -5   4    0.53    1.08
   2  -5  -4    0.40    0.63
  -2  -5   4    0.64    1.07
   2   5  -4    0.67    1.00
   2   5  -4   -0.06    1.12
  -2   5   4    0.30    0.76
  -2   5   4    0.39    0.41
  -2  -5   3    1.48    1.11
  -2   5   3    1.37    0.45
  -2  -5   3    1.57    1.12
   2   5  -3   -0.23    1.10
   2   5  -3    0.35    1.15
  -2   5   3    1.59    0.83
   2   5  -2  592.13   13.36
  -2   5   2  585.46   12.59
  -2  -5   2  587.65   13.41
   2  -5  -2  592.79   12.51
   2  -5  -2  596.20   12.95
  -2   5   2  583.09   12.96
  -2  -5   2  582.92   13.28
   2   5  -2  601.29   13.40
   2   5  -1   57.95    2.25
  -2   5   1   54.36    1.97
  -2   5   1   55.90    1.71
   2  -5  -1   56.56    1.66
  -2  -5   1   52.14    2.31
   2  -5  -1   55.73    2.00
   2   5  -1   53.63    2.22
  -2   5   0 2332.73   48.47
   2  -5   0 2278.78   48.27
  -2   5   0 2325.90   48.31
   2   5   0 2333.83   48.68
   2   5   0 2270.12   48.77
   2  -5   0 2247.05   48.55
   2   5   0 2336.09   48.90
   2   5   1 1120.18   24.10
  -2   5  -1 1094.41   23.61
   2  -5   1 1113.72   23.60
   2   5   1 1098.40   23.90
  -2   5  -1 1089.40   23.67
   2   5   1 1095.55   23.77
   2   5   2    5.21    1.39
  -2   5  -2    5.16    1.08
   2  -5   2    4.41    1.08
  -2   5  -2    6.70    1.10
   2   5   2    6.73    1.12
   2   5   3  952.26   19.68
  -2   5  -3  863.61   19.78
  -2   5  -3  902.01   19.74
   2  -5   3  896.86   19.79
   2   5   3  886.38   19.97
   2   5   4 2437.13   51.62
  -2   5  -4 2453.85   51.55
   2  -5   4 2384.15   51.55
  -2   5  -4 2445.98   51.42
  -2   5  -4 2419.26   51.20
   2  -5   5    8.87    1.35
  -2  -5  -5   10.31    0.41
   2   5   5    9.07    1.35
  -2   5  -5    7.37    1.38
  -2   5  -5    9.64    1.35
  -2   5  -5    8.37    1.13
  -2   5  -6  816.88   17.81
   2  -5   6  778.69   17.96
  -2   5  -6  774.75   17.34
  -2   5  -6  802.24   18.06
   2   5   6  798.41   17.82
   2   5   7   50.88    2.39
  -2   5  -7   48.39    2.43
  -2   5  -7   49.64    2.64
   2  -5   7   52.97    2.59
  -2   5  -7   48.26    2.07
  -2   5  -8 2154.98   46.56
   2   5   8 2185.82   46.32
   2  -5   8 2206.44   47.06
  -2   5  -8 2254.45   47.02
   2   5   8 2109.32   46.20
   2   5   8 2202.00   46.45
  -2   5  -8 2151.74   45.99
   2  -5   8 2173.80   46.90
   2  -5   9   -0.38    1.49
   2  -5   9    0.70    1.70
  -2   5  -9    0.09    1.59
  -2   5  -9   -0.33    1.23
   2   5   9    0.13    1.39
   2   5   9    1.72    1.45
   2  -5  10  243.07    7.38
   2   5  10  252.83    6.62
   2   5  10  246.31    6.72
  -2   5 -10  256.42    7.30
  -2   5 -10  233.64    6.18
   2  -5  10  256.98    7.35
   2   5  10  249.89    6.78
  -2   5 -11  195.31    5.19
   2   5  11  193.84    5.50
   2   5  11  190.27    5.76
  -2   5 -11  191.48    6.23
   2   5  11  196.51    5.76
   2  -5  11  194.17    6.33
   2  -5  12   34.31    2.76
   2   5  12   31.41    2.39
   2   5  12   31.10    2.07
   2   5  12   27.52    2.27
  -2   5 -12   35.10    2.71
  -2   5 -12   32.12    1.87
   2  -5  13    3.52    2.03
  -2   5 -13    4.48    1.35
   2   5  13    0.65    1.67
   2   5  13    4.84    1.46
  -2   6  13   23.68    1.80
   2   6 -13   27.35    2.72
  -2  -6  13   24.84    2.55
   2   6 -12   24.61    2.68
  -2   6  12   23.45    1.60
  -2   6  12   27.72    1.79
  -2  -6  12   22.33    2.35
  -2   6  11    0.33    1.21
   2   6 -11    0.74    1.47
  -2   6  11   -0.22    1.14
   2   6 -11   -0.35    0.70
  -2  -6  11   -0.11    1.84
   2   6 -11    0.45    0.79
  -2   6  11    2.19    1.22
  -2   6  10   30.88    1.68
  -2   6  10   30.95    1.93
  -2   6  10   31.00    1.74
   2   6 -10   26.37    1.44
  -2  -6  10   29.54    2.41
   2   6 -10   29.80    1.24
   2   6  -9   84.15    3.26
  -2  -6   9   80.13    3.54
   2  -6  -9   75.92    2.31
  -2   6   9   81.11    2.63
   2   6  -9   77.73    2.29
   2   6  -9   79.82    2.62
  -2   6   9   76.11    3.00
  -2  -6   9   79.75    3.49
  -2   6   9   85.12    2.70
   2   6  -8  231.43    5.91
   2   6  -8  227.78    5.61
   2   6  -8  234.29    6.86
  -2  -6   8  248.28    6.81
  -2   6   8  233.84    5.72
  -2   6   8  237.66    6.40
  -2  -6   8  235.11    6.84
   2  -6  -8  230.99    5.43
   2   6  -8  249.83    6.48
  -2   6   8  238.02    5.68
   2   6  -7   33.16    2.34
   2   6  -7   34.11    1.84
  -2   6   7   33.91    1.39
   2  -6  -7   31.58    1.29
   2   6  -7   34.99    2.07
  -2  -6   7   33.41    2.24
  -2  -6   7   32.87    2.26
  -2   6   7   30.47    2.16
  -2  -6   6  677.08   15.79
   2  -6  -6  670.89   14.62
  -2   6   6  701.44   14.63
   2   6  -6  689.19   15.31
  -2   6   6  672.94   14.57
   2   6  -6  670.48   15.90
  -2   6   6  689.71   15.11
  -2  -6   6  670.80   15.82
   2   6  -5  474.02   11.30
  -2  -6   5  475.45   11.15
   2  -6  -5  454.73   10.12
  -2   6   5  473.39    9.96
   2   6  -5  463.15   10.82
  -2   6   5  450.78    9.99
  -2   6   5  462.41   10.54
  -2  -6   5  462.15   11.15
   2   6  -4   76.12    3.03
   2   6  -4   73.16    2.78
  -2  -6   4   80.16    2.96
  -2  -6   4   74.58    2.85
  -2   6   4   75.45    2.49
  -2   6   4   76.20    2.00
  -2  -6   3   29.07    1.74
  -2  -6   3   27.27    1.81
  -2   6   3   30.16    1.08
   2   6  -3   26.45    1.85
   2   6  -3   29.61    1.87
  -2   6   3   29.29    1.48
   2   6  -3   31.11    1.80
  -2  -6   2    5.30    1.22
  -2   6   2    4.65    0.68
  -2   6   2    5.56    0.99
   2   6  -2    5.77    1.17
   2  -6  -2    6.35    0.61
   2   6  -2    5.52    1.24
  -2   6   1  345.78    7.97
  -2   6   1  336.39    7.65
   2  -6  -1  342.05    8.04
  -2  -6   1  355.68    8.33
   2  -6  -1  331.91    7.56
   2   6  -1  337.38    8.27
   2   6  -1  322.02    8.20
   2   6   0  473.74   11.44
   2  -6   0  488.28   10.79
  -2   6   0  479.85   11.00
   2   6   0  490.03   11.34
   2  -6   0  489.11   11.13
   2   6   0  483.18   11.20
  -2   6   0  481.61   10.83
   2   6   1  280.73    7.37
  -2   6  -1  285.92    6.88
   2   6   1  286.98    7.23
   2   6   1  284.09    7.04
  -2   6  -1  285.90    6.95
   2  -6   1  290.22    6.84
  -2   6  -2  263.79    6.61
  -2   6  -2  269.94    6.61
   2   6   2  268.22    6.83
   2  -6   2  266.39    6.57
   2   6   2  263.86    6.59
   2   6   2  262.41    6.98
  -2   6  -3  700.87   16.18
   2   6   3  721.61   16.47
   2  -6   3  738.68   16.20
  -2   6  -3  734.83   16.12
   2   6   3  709.79   15.99
  -2   6  -4   40.91    2.08
   2  -6   4   44.78    2.16
   2   6   4   44.08    1.97
   2   6   4   42.85    2.34
  -2   6  -4   43.30    2.01
  -2   6  -4   43.21    2.17
   2  -6   5   63.68    2.74
  -2   6  -5   60.93    2.66
   2   6   5   68.50    2.85
  -2   6  -5   63.34    2.43
   2  -6   5   67.15    2.75
  -2   6  -5   64.78    2.69
   2  -6   6  111.80    3.92
  -2   6  -6  106.72    3.96
  -2   6  -6  117.32    3.45
   2   6   6  111.12    3.85
  -2   6  -6  116.33    3.79
   2  -6   7  485.83   12.10
   2   6   7  498.50   11.86
  -2   6  -7  504.85   11.85
  -2   6  -7  501.39   12.15
  -2   6  -7  486.29   11.32
   2   6   8  310.23    7.98
   2  -6   8  306.85    8.33
  -2   6  -8  302.46    8.33
   2   6   8  306.79    7.64
  -2   6  -8  304.30    8.01
  -2   6  -8  305.17    7.45
   2   6   9 1055.31   23.32
   2  -6   9 1072.17   23.89
  -2   6  -9 1034.71   23.45
  -2   6  -9 1090.96   23.98
   2   6   9 1033.85   23.11
  -2   6  -9 1038.90   22.78
   2   6   9 1025.47   23.06
  -2   6 -10  111.29    4.39
   2  -6  10  112.66    4.34
  -2   6 -10  107.13    3.40
   2   6  10  105.10    3.78
   2   6  10  101.75    3.69
   2   6  10  103.01    3.72
  -2   6 -11   77.83    2.81
   2  -6  11   71.41    3.80
  -2   6 -11   75.17    3.77
   2   6  11   81.40    3.23
   2   6  11   73.04    3.19
   2   6  11   79.07    3.25
  -2   6 -12   82.97    2.96
   2   6  12   78.50    3.46
   2   6  12   82.00    3.24
  -2   6 -12   80.16    3.91
   2   6  12   77.30    3.38
   2  -6  12   83.75    4.10
   2  -6  13    0.39    2.01
   2   6  13    2.55    1.77
  -2   6 -13    5.74    2.11
   2   6  13    1.79    1.53
  -2   6 -13    2.28    1.35
  -2  -7  13   -0.76    1.99
   2   7 -13    0.80    2.07
  -2  -7  12   16.22    2.37
   2   7 -12   15.14    1.05
   2   7 -12   14.48    0.95
  -2   7  12   14.53    1.57
  -2   7  12   14.66    1.58
  -2   7  11   62.36    2.59
  -2  -7  11   57.82    3.33
   2   7 -11   64.49    2.00
   2   7 -11   70.12    2.31
  -2   7  11   63.06    2.75
   2   7 -10  112.75    4.04
  -2   7  10  109.21    3.28
  -2   7  10  113.22    3.44
   2   7 -10  108.31    3.33
  -2   7  10  103.25    3.74
  -2  -7  10  115.18    4.49
   2   7 -10  106.81    2.96
   2   7  -9    7.97    1.70
   2   7  -9   10.82    1.41
   2   7  -9    8.89    2.04
  -2   7   9   10.42    1.11
  -2  -7   9    8.42    1.95
  -2  -7   9   10.87    1.89
   2  -7  -9   10.12    0.96
   2   7  -9    8.15    1.06
  -2   7   9    9.35    1.68
  -2   7   8   23.04    1.19
  -2   7   8   25.36    1.32
   2   7  -8   25.76    2.32
  -2   7   8   26.70    2.23
   2   7  -8   23.25    1.47
  -2   7   8   22.70    1.62
  -2  -7   8   20.33    2.19
  -2  -7   8   23.08    2.23
   2   7  -8   25.61    1.84
   2   7  -8   25.21    2.01
   2  -7  -8   22.92    1.15
  -2   7   7    9.22    0.86
  -2  -7   7    7.90    1.71
   2  -7  -7   12.31    0.96
   2   7  -7   11.69    1.97
  -2  -7   7    8.61    1.72
   2   7  -7   10.53    1.56
  -2   7   7   10.64    1.92
  -2   7   7    7.98    1.26
   2   7  -7   12.69    1.67
  -2   7   7   11.66    0.93
   2  -7  -6  159.58    3.84
   2   7  -6  158.62    5.11
  -2  -7   6  163.74    5.11
   2   7  -6  161.64    4.69
  -2   7   6  155.96    3.73
  -2   7   6  167.43    4.44
  -2   7   6  143.07    3.74
  -2  -7   6  151.38    4.90
  -2  -7   5  344.50    8.78
  -2   7   5  340.77    8.15
   2   7  -5  353.42    8.54
   2   7  -5  356.01    8.94
  -2  -7   5  345.51    8.68
  -2   7   5  325.20    7.50
   2   7  -4   75.10    3.01
  -2   7   4   74.94    2.10
   2   7  -4   78.31    3.19
  -2  -7   4   75.69    3.09
  -2   7   4   74.70    2.63
  -2   7   3    0.61    0.65
   2   7  -3    0.15    1.32
  -2   7   3   -0.15    0.97
   2   7  -3    0.37    1.21
  -2  -7   3    0.37    1.29
   2   7  -3    1.38    1.19
   2  -7  -2  136.22    3.32
  -2  -7   2  137.94    4.28
  -2   7   2  135.34    3.87
   2   7  -2  134.31    4.37
   2   7  -2  134.24    4.18
  -2   7   2  129.04    3.46
   2   7  -2  132.91    4.16
  -2   7   1  584.33   13.13
  -2   7   1  571.19   12.78
   2   7  -1  575.37   13.44
   2   7  -1  573.78   13.37
   2  -7  -1  579.13   13.17
  -2  -7   1  575.14   13.44
   2  -7  -1  585.82   12.67
  -2  -7   0  179.37    4.81
   2   7   0  179.52    5.00
  -2   7   0  176.65    4.63
   2  -7   0  182.53    4.57
   2   7   0  170.48    5.05
  -2   7   0  181.50    4.85
   2  -7   0  177.24    4.98
   2   7   1  475.14   11.71
   2   7   1  483.09   11.50
  -2   7  -1  493.98   11.27
  -2   7  -1  481.49   11.14
   2  -7   1  481.60   11.43
   2   7   1  489.78   11.35
   2  -7   1  488.50   11.08
   2   7   2    5.46    1.11
  -2   7  -2    4.44    1.13
   2  -7   2    7.99    1.17
   2   7   2    4.44    1.33
   2   7   2    9.14    1.59
  -2   7  -2    6.07    1.18
   2  -7   3   88.91    3.11
   2   7   3   89.87    3.03
   2   7   3   92.24    3.31
  -2   7  -3   86.10    3.05
  -2   7  -3   85.54    3.08
   2   7   3   88.04    3.42
  -2   7  -4   22.57    1.73
   2  -7   4   20.85    1.70
  -2   7  -4   23.21    1.84
  -2   7  -4   20.45    1.63
   2   7   4   21.02    1.96
   2   7   4   21.28    1.56
  -2   7  -5  232.52    6.35
   2   7   5  232.15    6.60
  -2   7  -5  234.59    6.50
  -2   7  -5  238.41    6.13
   2  -7   5  230.72    6.47
   2   7   5  238.90    6.16
  -2   7  -6  119.81    3.98
  -2   7  -6  116.79    4.13
   2  -7   6  113.96    4.13
  -2   7  -6  109.51    3.56
   2   7   6  110.97    4.08
   2  -7   6  115.92    4.09
  -2   7  -7  583.73   13.77
   2  -7   7  557.49   13.98
  -2   7  -7  590.53   14.07
   2   7   7  592.57   13.83
   2  -7   7  577.60   14.02
  -2   7  -7  577.06   13.19
   2  -7   8    1.20    1.65
  -2   7  -8    2.38    1.63
  -2   7  -8    1.58    1.31
  -2   7  -8    0.88    1.73
   2   7   8    2.41    1.69
   2   7   9   60.74    2.93
  -2   7  -9   61.76    2.52
  -2   7  -9   60.67    3.33
   2  -7   9   58.28    3.28
   2   7   9   63.42    2.64
  -2   7  -9   60.86    2.96
  -2   7 -10  274.19    7.99
   2  -7  10  275.63    7.99
   2   7  10  271.89    7.37
   2   7  10  277.25    7.17
   2   7  10  267.87    7.16
  -2   7 -10  259.28    6.79
  -2   7 -11  168.94    4.84
   2   7  11  174.30    5.31
   2   7  11  167.21    5.21
   2  -7  11  174.73    6.02
   2   7  11  177.77    5.35
  -2   7 -11  174.11    5.94
   2   7  12   -0.35    1.67
  -2   7 -12   -0.12    2.03
   2   7  12    1.02    1.52
   2  -7  12   -0.52    2.03
  -2   7 -12   -0.50    1.38
   2   7  12   -0.08    1.67
  -2   8  12  130.93    4.06
   2   8 -12  131.44    3.36
   2   8 -12  130.77    3.63
  -2  -8  12  138.12    5.36
  -2   8  12  120.17    4.13
   2   8 -11   69.94    2.64
   2   8 -11   70.66    2.23
  -2   8  11   69.24    3.03
  -2   8  11   64.74    2.82
  -2  -8  11   64.31    3.68
  -2   8  11   68.01    2.66
  -2   8  10    1.07    1.31
   2   8 -10    0.12    1.82
  -2   8  10    1.52    0.99
  -2   8  10    1.09    1.58
  -2  -8  10    0.12    1.89
   2   8 -10   -0.80    0.97
  -2   8  10    0.42    0.86
   2  -8 -10    0.40    0.86
   2   8 -10    1.38    1.30
  -2   8   9   57.55    2.98
   2   8  -9   53.65    2.14
   2   8  -9   51.56    3.19
   2  -8  -9   54.45    1.79
  -2   8   9   54.71    1.98
  -2  -8   9   56.08    3.23
  -2   8   9   55.01    1.91
   2   8  -9   53.07    2.85
  -2   8   9   53.36    2.45
   2   8  -9   49.82    2.48
   2   8  -8   80.17    3.80
   2   8  -8   77.62    3.32
  -2  -8   8   80.81    3.70
  -2   8   8   81.81    3.00
  -2   8   8   80.83    2.39
  -2   8   8   78.80    3.63
  -2   8   8   75.43    2.32
   2  -8  -8   78.97    2.27
   2   8  -8   78.76    3.13
  -2  -8   8   77.15    3.60
  -2   8   7   19.28    1.10
   2  -8  -7   21.41    1.17
  -2  -8   7   24.09    2.15
   2   8  -7   20.17    1.92
  -2  -8   7   17.72    2.16
  -2   8   7   22.66    1.14
   2   8  -7   19.82    1.91
  -2   8   7   20.95    1.70
  -2   8   7   21.21    2.37
   2   8  -7   21.65    2.27
   2  -8  -6  214.30    5.14
  -2   8   6  214.64    4.98
   2   8  -6  226.42    6.21
   2   8  -6  219.29    6.60
  -2   8   6  237.35    6.92
  -2  -8   6  213.94    6.42
  -2   8   6  225.39    5.85
  -2   8   6  206.91    5.07
  -2   8   5   20.51    1.59
   2   8  -5   18.30    2.00
  -2   8   5   20.80    1.10
   2   8  -5   23.36    2.09
  -2  -8   5   22.65    2.15
  -2  -8   4  458.70   11.50
  -2   8   4  451.33   10.25
   2   8  -4  468.14   11.55
   2   8  -4  487.29   11.45
   2   8  -4  477.86   11.33
  -2   8   4  463.51   10.88
   2   8  -3   29.28    2.19
   2   8  -3   27.54    2.06
  -2   8   3   27.51    1.33
  -2  -8   3   30.34    2.14
  -2   8   3   28.69    1.77
   2   8  -3   27.86    1.99
  -2  -8   2   96.44    3.41
   2   8  -2   95.59    3.58
  -2  -8   2   93.90    3.63
   2  -8  -2   97.28    2.66
   2   8  -2   95.37    3.52
   2   8  -2   99.35    3.78
  -2   8   2   98.43    2.87
  -2   8   2   96.54    3.25
  -2  -8   1   61.84    2.52
   2   8  -1   54.50    2.61
   2   8  -1   60.07    2.67
  -2   8   1   58.93    2.42
  -2   8   1   56.41    2.13
   2  -8  -1   58.26    2.01
   2  -8  -1   60.34    2.50
  -2   8   0  383.92    8.94
   2   8   0  380.12    9.33
  -2   8   0  374.91    9.16
  -2  -8   0  391.41    9.10
   2  -8   0  366.24    9.27
   2   8   0  379.85    9.49
   2  -8   0  372.53    8.79
   2   8   1  166.25    5.34
   2  -8   1  170.93    4.66
  -2   8  -1  172.61    4.76
   2   8   1  172.88    4.94
   2   8   1  173.98    5.17
   2  -8   1  166.28    5.04
  -2   8  -1  170.48    4.86
   2   8   2  155.93    4.59
   2  -8   2  159.16    4.49
   2   8   2  154.95    5.05
  -2   8  -2  150.04    4.49
   2   8   2  149.55    4.80
   2  -8   2  151.82    4.79
  -2   8  -2  156.45    4.57
   2   8   3   68.03    2.91
  -2   8  -3   62.93    2.69
   2  -8   3   61.42    2.61
   2   8   3   58.42    3.06
  -2   8  -3   62.76    2.66
   2   8   3   59.06    2.56
   2  -8   4    3.56    1.31
  -2   8  -4    6.69    1.49
  -2   8  -4    5.41    1.39
   2   8   4    4.92    1.83
   2   8   4    6.63    1.58
  -2   8  -4    3.27    1.39
   2   8   4    4.95    1.37
   2  -8   5  167.40    5.23
  -2   8  -5  170.90    5.21
  -2   8  -5  174.09    5.37
   2   8   5  174.81    5.37
   2   8   5  173.95    5.48
  -2   8  -5  173.25    5.00
   2   8   5  180.85    5.03
   2  -8   6    7.17    1.74
   2   8   6    5.05    1.38
   2   8   6    6.47    1.87
  -2   8  -6    5.83    1.75
   2  -8   6    4.42    1.65
  -2   8  -6    4.98    1.44
  -2   8  -6    8.56    1.67
  -2   8  -7   48.03    2.94
   2  -8   7   57.07    2.98
   2   8   7   50.36    2.91
   2  -8   7   50.03    3.04
  -2   8  -7   52.67    2.76
  -2   8  -7   56.77    2.49
   2   8   7   51.23    2.46
  -2   8  -8  160.60    5.14
   2  -8   8  150.60    5.30
   2   8   8  163.18    5.20
  -2   8  -8  152.00    4.53
  -2   8  -8  166.21    5.48
   2  -8   8  147.69    5.36
  -2   8  -9  277.56    7.10
  -2   8  -9  277.62    8.12
   2   8   9  282.30    7.74
   2   8   9  283.18    7.21
   2  -8   9  276.59    8.26
  -2   8 -10    2.32    1.42
   2   8  10    0.18    1.64
  -2   8 -10    3.53    2.02
   2   8  10    0.56    1.36
   2   8  10    1.47    1.33
   2  -8  10    1.48    1.97
   2  -8  11   45.40    3.32
  -2   8 -11   49.71    2.43
   2   8  11   51.44    2.60
  -2   8 -11   50.86    3.34
   2   8  11   54.50    2.85
   2   8  12  184.12    5.66
  -2   8 -12  177.11    5.12
  -2   8 -12  186.26    6.39
   2   8  12  180.86    5.62
  -2   9  11   30.26    2.39
  -2   9  11   32.14    1.96
   2   9 -11   28.73    2.92
   2   9 -11   32.93    1.62
   2   9 -11   32.31    2.09
   2   9 -10    0.39    2.03
   2   9 -10   -0.43    1.42
   2  -9 -10   -0.60    0.86
  -2   9  10    1.18    1.09
   2   9 -10    0.57    1.07
  -2   9  10    1.09    1.40
  -2   9  10    1.94    1.78
  -2  -9  10    1.12    1.81
   2   9  -9  205.51    6.59
   2  -9  -9  203.28    4.70
   2   9  -9  195.53    5.25
  -2  -9   9  202.45    6.57
   2   9  -9  200.20    5.73
  -2   9   9  213.91    6.42
  -2   9   9  200.98    5.62
  -2   9   8   11.61    2.31
   2   9  -8    9.96    1.82
   2   9  -8   12.90    2.24
  -2   9   8    9.60    0.96
   2  -9  -8    8.05    0.96
  -2   9   8    9.12    0.96
  -2  -9   8   11.57    2.16
  -2   9   8   11.81    1.61
   2   9  -8   10.77    1.83
   2  -9  -7   20.85    1.22
  -2   9   7   25.92    2.73
  -2   9   7   23.54    1.20
   2   9  -7   25.61    2.49
  -2  -9   7   17.72    2.25
  -2   9   7   23.37    1.14
  -2   9   7   22.52    1.81
   2   9  -7   24.63    2.18
   2   9  -6  131.91    4.55
   2  -9  -6  128.54    3.44
   2   9  -6  131.27    4.84
  -2  -9   6  126.51    4.79
  -2   9   6  132.29    4.12
  -2   9   6  125.22    3.37
   2   9  -5   12.36    1.98
   2   9  -5   11.60    1.93
  -2   9   5   11.08    1.55
  -2  -9   5   13.32    2.07
  -2   9   5   10.61    0.98
  -2   9   4  237.17    5.71
  -2  -9   4  231.44    6.65
   2   9  -4  229.40    6.84
   2   9  -4  242.48    6.96
  -2   9   4  240.90    6.35
  -2  -9   4  234.94    6.92
   2   9  -4  239.69    6.74
  -2  -9   3  617.71   14.45
  -2   9   3  611.94   13.65
  -2  -9   3  599.40   14.76
   2   9  -3  635.55   14.68
  -2   9   3  611.48   14.23
   2   9  -3  621.20   14.86
   2   9  -3  627.00   14.78
  -2  -9   2  322.52    8.17
   2   9  -2  324.55    8.44
  -2  -9   2  315.36    8.49
   2   9  -2  314.60    8.35
  -2   9   2  311.42    8.03
  -2   9   2  318.84    7.58
   2   9  -2  316.51    8.63
   2   9  -1  290.33    7.80
  -2   9   1  290.84    7.12
  -2  -9   1  286.92    7.40
   2  -9  -1  289.86    7.54
   2  -9  -1  290.57    6.90
   2   9  -1  282.29    7.69
  -2   9   1  291.20    7.46
   2   9   0  206.52    5.88
   2  -9   0  204.12    5.33
  -2   9   0  202.33    5.49
   2  -9   0  212.44    5.94
   2   9   0  208.94    6.06
  -2   9   0  201.21    5.72
  -2  -9   0  208.61    5.63
  -2   9  -1    2.21    1.21
   2   9   1    2.89    1.41
   2   9   1    0.60    1.79
   2   9   1    3.32    1.48
   2  -9   1    1.52    1.14
  -2   9  -1    1.19    1.29
   2  -9   1    0.89    1.43
   2   9   2   25.01    1.89
   2  -9   2   28.29    1.88
   2   9   2   24.72    2.39
  -2   9  -2   25.58    1.90
  -2   9  -2   27.31    1.90
   2   9   2   28.05    2.22
   2  -9   2   26.48    2.10
   2   9   3   33.20    2.08
   2   9   3   27.93    2.52
   2  -9   3   26.44    2.01
   2  -9   3   26.04    2.23
   2   9   3   29.18    2.28
  -2   9  -3   27.74    2.05
  -2   9  -3   29.05    2.08
  -2   9  -4  289.40    7.38
   2  -9   4  279.06    7.38
  -2   9  -4  270.25    7.41
   2   9   4  262.54    7.18
  -2   9  -4  269.62    7.25
   2   9   4  270.99    7.59
   2   9   4  275.84    7.85
   2   9   5  151.34    4.56
   2  -9   5  135.50    4.64
  -2   9  -5  146.41    4.66
   2   9   5  147.48    4.94
  -2   9  -5  145.99    4.84
   2   9   5  136.79    5.01
  -2   9  -5  140.89    4.49
  -2   9  -6   72.24    3.22
   2   9   6   69.84    2.93
   2  -9   6   71.97    3.20
   2   9   6   69.73    3.51
   2   9   6   75.54    3.38
  -2   9  -6   65.72    3.31
  -2   9  -6   69.87    2.94
   2   9   7  532.83   12.69
   2   9   7  547.19   13.40
  -2   9  -7  533.28   13.04
  -2  -9  -7  540.09   11.34
  -2   9  -7  543.83   13.39
   2   9   7  539.71   13.22
  -2   9  -7  525.41   12.55
   2  -9   7  523.61   13.47
   2  -9   7  526.27   13.26
  -2   9  -8    0.56    1.35
   2   9   8   -1.70    1.95
   2   9   8    2.04    1.41
  -2   9  -8    0.22    1.73
   2  -9   8    0.93    1.76
  -2   9  -9   16.59    2.30
   2   9   9   16.33    1.67
  -2   9  -9   17.43    1.75
   2   9   9   16.93    2.24
   2  -9   9   19.79    2.44
   2   9   9   16.12    1.85
   2   9  10  224.14    6.31
  -2   9 -10  211.32    5.97
   2   9  10  226.45    6.17
   2   9  10  221.21    6.67
   2  -9  10  218.83    7.20
  -2   9 -11  106.00    3.62
   2   9  11  100.63    4.10
   2   9  11  102.33    3.76
  -2   9 -11  108.46    4.62
   2  -9  11  102.33    4.78
  -2  10  10   -0.11    1.97
   2 -10 -10    3.02    0.88
   2  10 -10    0.89    1.64
  -2 -10  10    0.13    2.01
  -2  10  10    3.50    1.18
   2  10 -10    2.31    1.23
   2  10  -9   -0.35    1.34
  -2  10   9   -0.85    2.15
   2  10  -9    0.92    2.04
   2  10  -9    2.35    1.68
  -2  10   9    0.85    1.48
  -2 -10   9    1.78    1.97
   2 -10  -9    1.18    0.84
  -2  10   8    5.32    0.88
  -2  10   8    4.42    1.54
  -2  10   8    4.16    2.25
   2  10  -8    3.30    2.01
  -2 -10   8    3.46    1.94
   2 -10  -8    4.90    0.92
   2  10  -8    1.37    1.75
   2  10  -7   60.61    3.22
  -2 -10   7   67.23    3.65
  -2  10   7   62.72    2.07
   2  10  -7   71.64    3.67
   2 -10  -7   64.86    2.13
  -2  10   7   62.91    1.96
  -2  10   7   63.62    2.85
  -2  10   7   76.37    4.12
   2  10  -6   44.69    2.90
  -2  10   6   48.25    3.60
  -2 -10   6   47.45    2.84
  -2 -10   6   43.81    3.00
  -2  10   6   41.80    2.39
   2  10  -6   46.97    3.02
  -2  10   6   41.71    1.67
   2  10  -5  173.69    5.60
  -2 -10   5  158.82    5.28
  -2  10   5  151.81    4.09
  -2 -10   5  159.35    5.53
  -2  10   5  159.64    4.85
   2  10  -5  168.51    5.35
   2  10  -5  153.96    5.36
  -2 -10   4  192.25    5.81
   2  10  -4  194.04    6.10
  -2  10   4  188.65    4.84
   2  10  -4  185.62    6.08
  -2 -10   4  193.52    6.12
  -2  10   4  188.30    5.49
   2  10  -4  184.82    5.81
  -2  10   3   -0.18    1.02
  -2 -10   3    1.61    1.73
   2  10  -3   -1.28    1.62
   2  10  -3    0.53    1.99
  -2 -10   3   -1.23    1.57
   2  10  -3   -0.65    1.57
  -2  10   3   -1.77    1.39
   2  10  -2   49.04    2.73
   2  10  -2   48.68    2.77
  -2 -10   2   44.49    2.85
   2  10  -2   46.29    3.01
  -2  10   2   44.24    2.04
  -2 -10   2   48.24    2.58
  -2  10   2   48.07    2.51
  -2 -10   1  614.08   14.22
  -2  10   1  613.05   14.30
   2 -10  -1  612.30   14.39
   2 -10  -1  594.14   13.62
  -2  10   1  612.40   13.91
   2  10  -1  617.82   14.67
   2  10  -1  628.74   14.63
   2 -10   0 1072.52   23.54
  -2  10   0 1093.16   23.77
   2 -10   0 1087.10   24.26
   2  10   0 1078.12   24.36
  -2  10   0 1086.21   24.05
   2  10   0 1057.58   24.20
  -2 -10   0 1082.63   23.84
   2  10   1    6.69    1.81
  -2  10  -1    5.36    1.44
   2 -10   1    4.58    1.21
   2 -10   1    7.23    1.61
   2  10   1    5.22    1.56
  -2  10  -1    4.11    1.49
   2  10   1    1.89    1.96
   2 -10   2  219.25    6.05
  -2  10  -2  219.84    6.25
   2  10   2  223.04    6.29
  -2  10  -2  227.36    6.22
   2 -10   2  224.14    6.62
   2  10   2  221.42    6.52
   2  10   2  211.27    6.87
  -2  10  -3    0.33    1.42
  -2  10  -3    0.41    1.48
   2 -10   3    2.57    1.65
   2  10   3    1.37    1.97
   2  10   3    0.67    1.72
   2  10   3    0.63    1.42
   2 -10   3   -0.83    1.40
   2 -10   4   42.29    2.51
   2  10   4   46.70    2.56
  -2  10  -4   52.25    2.82
   2  10   4   45.53    3.13
  -2  10  -4   49.41    2.68
   2  10   4   43.60    2.75
   2 -10   4   49.01    2.88
  -2  10  -4   47.37    2.58
   2  10   5  320.61    8.97
  -2  10  -5  319.33    8.61
  -2  10  -5  319.15    8.26
   2  10   5  314.27    8.24
   2  10   5  325.20    8.71
  -2  10  -5  316.54    8.45
   2 -10   5  300.50    8.41
  -2  10  -6   11.73    2.01
   2  10   6   13.40    1.78
  -2  10  -6    9.63    1.79
   2  10   6   11.01    2.24
   2  10   6   14.06    2.05
  -2  10  -6   10.74    1.81
   2 -10   6   12.56    1.94
   2  10   7    0.57    2.02
  -2  10  -7   -2.06    1.57
  -2  10  -7   -0.22    1.69
   2  10   7    1.34    1.47
   2  10   7   -1.42    1.89
   2 -10   7    1.63    1.60
   2  10   8   32.90    2.25
   2 -10   8   30.26    2.84
   2  10   8   36.50    2.84
  -2  10  -8   33.58    2.20
   2  10   9   74.48    3.71
   2  10   9   66.43    3.06
  -2  10  -9   80.58    3.83
   2 -10   9   74.23    3.96
  -2  10  -9   74.28    3.04
  -2  10 -10   -3.57    2.17
   2  10  10    0.53    1.87
   2 -10  10    0.55    2.01
   2  10  10    1.43    1.52
  -2  10 -10    1.57    1.60
   2 -11  -9    0.33    0.87
   2  11  -9   -0.79    1.48
   2  11  -9    0.55    2.03
   2  11  -9    2.99    1.80
  -2  11   9    5.12    2.53
  -2 -11   9    2.74    1.99
  -2  11   8    7.42    1.66
   2  11  -8    9.23    2.23
  -2 -11   8    7.51    2.16
   2  11  -8   10.15    2.06
   2 -11  -8    6.20    1.02
  -2  11   8    7.93    2.62
   2  11  -7   86.42    4.12
  -2  11   7   93.28    3.55
   2 -11  -7   82.58    2.63
  -2 -11   7   86.42    4.23
   2  11  -7   85.88    3.89
   2  11  -6  191.57    6.25
  -2  11   6  183.81    4.76
   2  11  -6  190.84    6.40
  -2 -11   6  184.49    6.39
  -2  11   6  196.85    5.72
  -2  11   5  101.85    3.05
   2  11  -5  103.86    4.37
   2  11  -5  104.08    4.42
  -2  11   5  113.86    5.31
  -2 -11   5   97.32    4.39
  -2  11   5  104.60    3.82
  -2 -11   5   99.15    4.11
   2  11  -4    1.50    1.73
   2  11  -4    0.11    1.84
   2  11  -4   -0.12    2.04
  -2 -11   4    0.83    1.66
  -2  11   4    0.32    1.01
  -2 -11   4   -0.11    1.83
  -2  11   4    0.32    1.46
   2  11  -3  122.65    4.87
   2  11  -3  127.64    4.68
  -2  11   3  122.96    4.20
   2  11  -3  120.71    4.54
  -2 -11   3  119.88    4.66
  -2 -11   3  122.32    4.34
  -2  11   3  117.82    3.63
  -2  11   2  252.26    6.64
  -2 -11   2  262.01    7.17
   2  11  -2  260.72    7.55
   2  11  -2  257.31    7.87
   2  11  -2  271.69    7.58
  -2  11   2  275.57    7.28
  -2 -11   1    3.51    1.52
  -2  11   1    6.49    1.38
   2  11  -1    4.83    2.16
   2  11  -1    6.76    1.86
  -2  11   1    4.00    1.52
   2 -11  -1    6.78    1.20
   2  11  -1    6.55    1.85
   2  11   0   -0.74    1.56
   2 -11   0    0.11    1.19
   2 -11   0    1.84    1.59
  -2  11   0    1.66    1.54
  -2  11   0    1.18    1.35
   2  11   0    2.19    1.71
  -2  11  -1    7.57    1.71
   2  11   1    8.74    1.73
  -2  11  -1   13.07    1.65
   2  11   1    9.49    2.01
   2 -11   1    8.93    1.45
   2 -11   1   10.18    1.95
   2  11   1    8.09    2.26
  -2  11  -2    1.21    1.52
  -2  11  -2    0.08    1.48
   2  11   2    0.44    1.45
   2  11   2   -2.93    1.66
   2 -11   2    0.65    1.43
   2 -11   2    0.62    1.67
   2  11   2   -0.37    2.13
   2  11   3    1.37    1.56
  -2  11  -3    4.44    1.61
   2 -11   3    4.69    1.53
   2 -11   3    2.63    1.88
  -2  11  -3    1.87    1.66
   2  11   3    1.63    2.17
   2  11   3    2.75    1.78
  -2  11  -4   20.00    2.09
   2 -11   4   20.87    2.28
   2  11   4   20.14    2.61
  -2  11  -4   21.48    2.13
  -2  11  -4   20.19    2.13
   2 -11   4   21.05    2.06
   2  11   4   22.21    2.33
   2  11   4   18.47    1.95
   2 -11   5  107.00    4.11
   2  11   5   97.14    3.81
   2  11   5  106.12    4.62
  -2  11  -5  105.82    4.17
  -2  11  -5  102.21    3.91
   2  11   5  106.84    4.33
   2 -11   5  101.06    4.42
  -2  11  -6   12.52    1.89
   2  11   6    9.61    1.70
  -2  11  -6   11.33    1.99
   2  11   6   13.24    2.44
   2 -11   6   10.14    1.87
   2  11   7   15.46    2.46
  -2  11  -7   14.00    2.25
  -2  11  -7   12.82    1.86
   2  11   7   14.41    1.85
   2  11   8   24.47    2.12
   2  11   8   24.80    2.74
  -2  11  -8   25.35    2.68
  -2  11  -9  202.65    6.85
   2 -11   9  193.36    6.93
   2  11   9  195.95    5.98
  -2  12   8   51.37    3.99
   2  12  -8   48.17    3.48
   2  12  -8   45.82    3.11
  -2 -12   8   51.25    3.39
   2 -12  -8   45.82    1.81
   2  12  -7   28.74    2.78
   2  12  -7   30.19    2.79
  -2  12   7   33.35    2.37
  -2 -12   7   32.77    3.05
   2 -12  -7   30.77    1.63
  -2  12   6    5.35    2.83
  -2  12   6    1.30    1.61
   2  12  -6    0.90    2.08
  -2 -12   6    2.23    1.97
   2  12  -6   -1.32    2.08
   2  12  -5   22.93    2.59
  -2  12   5   24.16    3.42
   2  12  -5   24.37    2.60
  -2  12   5   22.17    1.47
  -2  12   5   19.34    2.02
  -2 -12   5   22.69    2.60
   2  12  -4    5.29    2.18
   2  12  -4    5.01    2.02
  -2  12   4    3.20    1.14
  -2  12   4    3.57    1.68
  -2 -12   4    2.56    2.05
  -2 -12   3   -0.23    1.95
  -2  12   3   -0.67    1.14
  -2  12   3   -0.97    1.58
   2  12  -3    1.16    2.21
   2  12  -3   -0.57    1.67
  -2 -12   3    2.08    1.68
  -2  12   2   -1.15    1.65
  -2  12   2    0.62    1.15
   2  12  -2    0.78    2.18
   2  12  -2    0.11    1.75
  -2 -12   2   -1.01    1.55
  -2 -12   1   24.44    2.05
   2  12  -1   21.36    2.76
  -2  12   1   21.24    1.79
  -2  12   1   24.60    2.12
   2  12  -1   16.08    2.11
   2 -12  -1   23.04    1.60
   2  12   0    5.11    1.82
  -2  12   0    6.87    1.72
   2 -12   0    4.96    1.75
  -2  12   0    3.18    1.49
   2 -12   0    5.86    1.35
   2  12   1   49.92    2.83
  -2  12  -1   54.02    2.72
  -2  12  -1   56.86    2.90
   2 -12   1   52.69    2.50
   2 -12   1   46.05    2.98
   2 -12   2    9.41    1.61
   2 -12   2   14.19    2.20
   2  12   2   10.37    2.53
   2  12   2    9.59    1.85
  -2  12  -2   11.34    1.81
  -2  12  -2    9.72    1.83
   2 -12   3   66.54    3.03
  -2  12  -3   63.30    3.13
   2  12   3   64.89    3.85
   2 -12   3   64.96    3.55
   2  12   3   62.34    3.06
   2  12   4    1.73    1.57
   2 -12   4    0.45    1.55
  -2  12  -4   -1.01    1.65
   2  12   4   -0.27    2.32
   2 -12   4   -0.37    1.97
   2  12   5   32.83    2.39
   2  12   5   37.26    3.21
   2 -12   5   32.72    2.84
  -2  12  -5   35.68    2.69
   2  12   6  417.76   10.69
   2  12   6  427.45   11.72
  -2  12  -6  439.18   11.28
   2 -12   6  406.78   11.49
   2  12   7   32.84    2.33
  -2  12  -7   32.61    2.78
   2  12   7   29.18    3.11
   2  12   8    1.49    2.32
  -2  12  -8   -0.38    2.12
   2  12   8    3.83    1.59
  -2 -13   6   44.30    3.39
   2  13  -6   44.77    3.35
  -2  13   6   53.65    4.37
   2  13  -6   42.33    3.22
   2  13  -5    4.82    2.19
   2  13  -5    3.06    2.35
  -2 -13   5    7.12    2.24
  -2  13   5    6.52    1.76
   2  13  -4   31.57    3.04
  -2  13   4   36.88    3.82
   2  13  -4   25.32    2.59
  -2 -13   4   37.96    2.97
  -2  13   4   25.86    2.32
   2  13  -3    2.06    1.95
  -2  13   3    4.84    1.31
   2  13  -3    7.93    2.45
  -2  13   3    2.81    1.69
  -2  13   2   16.51    2.04
   2  13  -2   20.93    2.47
   2  13  -2   20.81    2.86
  -2  13   2   18.66    1.71
   2  13  -1  294.01    8.49
  -2  13   1  299.78    7.79
   2  13  -1  298.31    9.11
   2 -13   0   29.11    1.88
   2  13   0   29.84    2.47
  -2  13   0   25.95    2.09
   2  13   1   75.28    3.55
  -2  13  -1   80.08    3.39
   2 -13   1   78.39    3.78
   2 -13   1   73.24    3.07
   2 -13   2    7.25    1.64
  -2  13  -2    4.30    1.68
   2 -13   2    8.21    2.14
   2  13   2    5.77    2.45
   2  13   2    8.65    1.82
   2  13   3    1.17    1.60
  -2  13  -3    1.00    1.75
   2  13   3    3.41    2.45
   2 -13   3    4.07    1.60
   2 -13   3    1.75    2.09
   2  13   4    3.86    1.79
  -2  13  -4    5.62    1.95
   2  13   4    4.47    2.48
   2 -13   4    3.76    2.16
   2  13   5   44.12    2.76
   2 -13   5   43.53    3.29
   2  13   5   50.05    3.68
  -2  13  -5   45.13    3.03
   2 -13   6  116.83    5.10
  -2  13  -6  121.34    4.85
   2  13   6  121.82    5.43
   2  13   6  123.79    4.48
   2  14  -3  193.61    6.71
   2  14  -3  205.46    7.20
  -2  14   3  216.79    8.09
   2  14  -2   14.52    2.40
   2  14  -2   15.22    2.82
   2  14  -1    2.96    2.01
   2  14  -1   -0.92    2.46
   2  14   0   23.74    3.18
  -2  14   0   30.53    2.28
   2  14   0   28.92    2.67
   2 -14   0   27.42    1.93
   2  14   1   52.74    3.16
  -2  14  -1   53.05    2.88
   2 -14   1   44.73    2.49
  -2  14  -2  215.76    6.61
   2 -14   2  224.23    7.27
   2 -14   2  217.91    6.33
   2  14   2  229.63    7.85
   2  14   2  223.20    6.83
   2  14   3   29.39    2.56
   2 -14   3   30.20    2.87
  -2  14  -3   34.01    2.58
  -3   0  14    9.10    1.62
  -3   0  14    7.65    1.85
   3   0 -14   10.33    1.76
  -3   0  14    7.99    1.17
  -3   0  13   -0.35    1.06
   3   0 -13   -0.16    1.44
  -3   0  13    0.07    1.31
  -3   0  13    2.05    1.62
  -3   0  12  905.42   20.34
  -3   0  12  916.27   20.78
   3   0 -12  924.55   20.60
  -3   0  12  905.45   19.75
  -3   0  11    1.65    1.48
   3   0 -11    0.79    1.36
  -3   0  11    0.66    1.17
  -3   0  11    1.43    1.04
  -3   0  10   15.63    1.71
  -3   0  10   13.88    1.23
   3   0 -10   17.29    1.24
   3   0 -10   17.40    1.69
  -3   0   9    0.44    1.20
  -3   0   9    0.72    0.91
   3   0  -9   -0.37    1.15
  -3   0   9    0.37    0.95
  -3   0   8    5.61    1.23
  -3   0   8    6.49    0.99
   3   0  -8    5.42    1.22
   3   0  -8    7.35    0.90
  -3   0   8    5.25    0.96
  -3   0   7   -0.41    0.81
  -3   0   7   -0.19    0.92
   3   0  -7   -0.68    0.91
   3   0  -7    0.17    0.65
  -3   0   7   -0.37    0.68
  -3   0   6 3905.41   81.23
   3   0  -6 4018.49   81.54
  -3   0   6 3907.04   81.50
  -3   0   6 3845.59   81.20
   3   0  -6 3850.81   81.10
  -3   0   5    0.10    0.88
   3   0  -5    0.33    0.88
   3   0  -5    0.53    0.57
  -3   0   5   -0.22    0.64
  -3   0   5   -0.29    0.81
  -3   0   5   -0.31    0.42
   3   0  -4  654.12   13.73
   3   0  -4  646.18   14.10
  -3   0   4  657.06   13.69
   3   0  -4  646.87   13.70
  -3   0   4  643.87   13.94
  -3   0   4  650.84   14.06
  -3   0   4  632.35   13.78
   3   0  -3    0.17    0.47
  -3   0   3   -0.30    0.62
  -3   0   3   -0.28    0.41
   3   0  -3    0.35    0.36
  -3   0   3    0.17    0.59
   3   0  -3    0.36    0.74
   3   0  -2 9771.79  205.16
  -3   0   2 9965.32  205.31
  -3   0   2 9999.00  205.31
  -3   0   2 9920.53  205.34
   3   0  -2 9937.15  205.37
   3   0  -1    0.28    0.49
  -3   0   1   -0.02    0.45
  -3   0   0  161.92    4.07
   3   0   0  172.40    4.07
   3   0   0  170.63    3.87
  -3   0   0  174.20    3.90
   3   0   1   -0.24    0.45
  -3   0  -1    0.17    0.70
   3   0   1    0.36    0.66
  -3   0  -2 5433.68  112.00
   3   0   2 5355.06  111.91
   3   0   2 5365.25  111.61
   3   0   3   -0.38    0.89
   3   0   3   -0.30    0.82
   3   0   4 4210.04   86.80
   3   0   4 4338.08   86.64
  -3   0  -5   -0.52    1.04
   3   0   5    0.60    0.97
   3   0   5    0.48    1.02
   3   0   5   -0.55    1.10
   3   0   6 3207.89   65.44
   3   0   6 3177.79   65.09
  -3   0  -6 2990.01   65.18
   3   0   6 3024.34   65.49
   3   0   7    0.84    1.08
   3   0   7    0.47    1.19
  -3   0  -7   -0.40    1.05
   3   0   7    0.81    0.95
   3   0   8    6.04    1.18
   3   0   8    4.61    1.36
  -3   0  -8    6.80    1.29
   3   0   8    4.57    1.56
   3   0   9    0.19    1.15
  -3   0  -9   -0.46    1.25
   3   0   9   -0.30    1.52
   3   0   9    0.50    1.47
  -3   0 -10 1524.97   31.89
   3   0  10 1491.87   32.31
   3   0  10 1478.27   32.53
   3   0  10 1416.25   31.51
   3   0  11   -0.90    1.68
   3   0  11    0.64    1.16
  -3   0 -11    0.53    1.41
   3   0  11   -0.60    1.79
   3   0  12   10.37    1.36
   3   0  12    9.08    1.87
  -3   0 -12   10.08    1.70
   3   0  13    0.10    1.22
  -3   0 -13   -0.59    1.54
   3   0  13    1.45    1.75
   3   0  14   52.56    3.25
  -3   0 -14   60.29    2.89
  -3   1  14   60.94    2.11
   3   1 -14   56.37    3.02
  -3  -1  14   57.34    2.27
  -3   1  14   60.31    3.06
  -3   1  14   59.38    2.74
  -3  -1  14   57.99    2.88
  -3  -1  13    2.68    1.42
  -3  -1  13    3.91    1.75
  -3   1  13   -0.44    1.61
   3   1 -13    1.60    1.62
   3   1 -13    2.54    1.16
  -3   1  13    3.01    1.35
  -3  -1  13    2.24    1.20
  -3   1  13    1.83    1.00
   3  -1 -12  206.23    5.68
   3   1 -12  200.17    6.02
  -3  -1  12  202.78    6.12
  -3   1  12  196.56    5.90
  -3  -1  12  195.60    5.26
  -3   1  12  211.13    5.07
   3   1 -12  206.53    5.43
  -3   1  12  199.75    5.53
  -3  -1  12  204.54    5.78
  -3  -1  11   62.16    2.40
   3  -1 -11   68.54    2.68
  -3  -1  11   58.61    2.93
  -3   1  11   62.58    2.77
  -3  -1  11   62.61    2.68
  -3   1  11   62.54    2.47
   3   1 -11   65.14    2.98
   3   1 -11   69.25    2.55
  -3   1  11   67.84    2.20
  -3   1  10   96.99    3.09
  -3   1  10  105.57    2.88
  -3   1  10   97.95    3.43
   3   1 -10  100.41    3.16
   3  -1 -10  101.90    3.33
  -3  -1  10   97.95    3.08
  -3  -1  10   96.37    3.29
  -3  -1  10   97.14    3.62
   3   1 -10  101.08    3.64
  -3   1   9    2.30    0.90
  -3  -1   9    1.86    1.29
  -3   1   9    2.14    1.13
  -3  -1   9    2.65    1.07
   3   1  -9    1.91    0.99
   3  -1  -9    3.14    1.11
   3   1  -9    1.50    1.26
  -3   1   9    1.21    0.85
  -3  -1   9    1.58    1.04
  -3   1   8    0.60    0.97
  -3  -1   8   -0.12    1.08
   3   1  -8    0.46    0.82
  -3   1   8   -0.09    0.79
   3  -1  -8    0.28    0.91
   3   1  -8    0.50    1.10
  -3   1   8    0.35    0.72
  -3  -1   8   -0.09    0.87
  -3  -1   8    0.94    0.96
  -3   1   7    5.67    0.39
  -3  -1   7    5.04    0.96
  -3   1   7    6.47    0.93
  -3  -1   7    8.18    1.17
   3   1  -7    7.16    0.88
   3   1  -7    5.59    1.10
  -3   1   7    6.71    0.82
   3  -1  -7    7.20    0.95
  -3   1   7    6.37    0.75
  -3   1   7    6.12    0.45
  -3  -1   7    7.16    0.93
  -3   1   6  551.45   12.38
  -3   1   6  554.45   12.10
   3  -1  -6  548.24   12.35
   3   1  -6  574.54   12.29
  -3  -1   6  570.59   12.40
  -3   1   6  564.97   11.83
   3   1  -6  548.48   12.68
  -3   1   6  555.09   12.17
  -3  -1   6  562.84   12.41
  -3  -1   6  564.71   12.65
  -3   1   5  198.00    4.86
  -3   1   5  200.76    4.76
  -3  -1   5  203.41    4.91
   3   1  -5  205.82    5.23
   3  -1  -5  208.21    4.89
  -3  -1   5  203.90    5.00
   3  -1  -5  197.96    4.94
  -3  -1   5  214.47    5.19
  -3   1   5  202.22    4.61
   3  -1  -5  202.52    4.49
   3   1  -5  202.99    4.82
  -3   1   5  213.25    4.54
   3  -1  -4    0.50    0.71
  -3   1   4    0.47    0.58
  -3  -1   4    0.87    0.92
  -3   1   4    0.98    0.65
   3   1  -4   -0.31    0.64
  -3  -1   4    0.25    0.58
  -3   1   4   -0.11    0.71
  -3  -1   4    0.22    0.69
  -3  -1   4    0.66    0.91
   3   1  -4   -0.09    0.48
  -3   1   4   -0.23    0.35
  -3   1   3 3465.17   71.67
   3  -1  -3 3449.70   71.70
  -3  -1   3 3392.37   71.97
   3   1  -3 3502.75   71.65
  -3  -1   3 3444.14   71.87
  -3  -1   3 3413.16   71.79
  -3   1   3 3395.64   71.74
  -3   1   3 3419.90   71.67
  -3  -1   3 3508.35   71.70
   3   1  -3 3424.74   71.77
  -3   1   2  401.56    8.62
  -3  -1   2  408.28    8.66
   3  -1  -2  385.84    8.60
   3  -1  -2  390.89    8.52
  -3   1   2  387.77    8.60
  -3  -1   2  408.04    8.70
   3   1  -2  390.41    8.79
  -3  -1   2  397.73    8.77
  -3   1   1  214.98    4.84
  -3   1   1  211.29    4.89
   3   1  -1  208.50    4.92
  -3  -1   1  216.76    4.85
   3  -1  -1  211.60    4.81
  -3  -1   1  219.88    4.98
   3   1   0   10.67    0.91
  -3   1   0   11.75    0.85
   3   1   0   11.07    0.71
   3  -1   0   12.67    0.85
  -3  -1   0   12.46    0.92
   3  -1   0   12.47    0.72
   3   1   1  544.80   11.96
  -3   1  -1  527.47   11.88
   3  -1   1  574.19   11.95
  -3   1  -1  537.67   11.74
  -3  -1  -1  560.07   11.99
   3   1   1  541.46   11.62
   3  -1   2   59.05    1.84
  -3   1  -2   52.07    1.80
   3   1   2   54.17    1.88
  -3   1  -2   53.72    1.68
  -3  -1  -2   51.05    1.87
   3   1   2   52.76    1.42
   3   1   3  293.65    6.51
  -3   1  -3  302.88    6.98
   3  -1   3  305.31    7.07
   3   1   3  317.32    7.10
   3  -1   3  274.92    7.03
   3   1   3  314.44    6.98
   3  -1   3  327.56    7.03
   3  -1   4 1002.55   21.28
   3  -1   4 1022.54   21.48
   3   1   4 1019.32   21.39
   3   1   4  966.11   20.73
   3  -1   4  966.45   21.52
  -3   1  -4 1036.20   21.36
   3  -1   5  509.93   12.30
   3  -1   5  533.23   12.24
   3   1   5  542.45   12.06
  -3   1  -5  514.20   12.01
   3  -1   5  524.93   11.93
  -3   1  -5  548.15   12.08
   3   1   5  544.21   12.18
   3   1   5  556.75   11.36
  -3  -1  -5  497.61   12.09
   3   1   6   62.78    2.30
  -3   1  -6   61.43    2.33
   3  -1   6   63.67    2.52
  -3   1  -6   62.44    2.33
   3   1   6   69.68    2.53
   3  -1   6   60.54    2.62
   3   1   6   63.03    2.49
   3  -1   6   63.56    2.20
  -3  -1  -6   63.83    2.38
   3   1   6   64.34    1.59
   3   1   7   19.75    1.41
   3  -1   7   15.31    1.58
  -3   1  -7   17.54    1.43
   3   1   7   18.58    1.57
  -3   1  -7   18.61    1.40
   3   1   7   20.09    1.64
   3  -1   7   20.55    1.36
   3  -1   7   20.61    1.69
  -3  -1  -7   16.81    1.46
   3  -1   8  278.56    6.83
  -3  -1  -8  286.41    7.16
  -3   1  -8  287.51    7.00
   3  -1   8  279.20    7.36
   3   1   8  284.26    7.28
   3  -1   8  276.59    7.46
   3   1   8  291.09    7.46
   3   1   8  272.04    6.89
   3   1   9   23.31    1.68
   3   1   9   24.46    1.96
   3  -1   9   18.56    1.49
   3  -1   9   18.17    1.79
  -3  -1  -9   19.39    1.77
   3   1   9   22.65    2.11
  -3   1  -9   19.02    1.64
   3  -1   9   17.08    2.01
   3  -1  10  201.23    5.98
   3   1  10  193.60    5.77
   3  -1  10  195.10    6.12
  -3  -1 -10  206.00    5.66
  -3   1 -10  210.93    5.48
   3   1  10  198.07    6.00
   3   1  10  198.59    5.30
   3  -1  10  192.09    5.22
   3  -1  11   67.11    3.22
   3   1  11   71.07    3.05
   3  -1  11   68.63    3.40
  -3   1 -11   70.93    2.72
   3  -1  11   66.36    2.47
  -3  -1 -11   75.88    2.95
   3   1  11   70.31    3.31
   3   1  11   63.21    2.43
   3  -1  12    6.17    1.72
   3   1  12    3.79    1.62
  -3   1 -12    7.48    1.50
   3   1  12    6.83    1.36
   3  -1  12    5.40    1.31
  -3  -1 -12    5.59    1.65
   3  -1  13  177.41    5.89
  -3  -1 -13  180.11    5.37
   3  -1  13  177.61    4.89
  -3   1 -13  180.48    5.18
   3   1  13  168.00    5.71
   3   1  13  167.16    4.76
  -3  -1 -14    0.99    1.66
  -3   1 -14    1.39    1.54
   3   1  14    1.63    1.89
   3  -1  14    1.14    1.79
   3   2 -14   63.65    2.76
  -3  -2  14   65.04    3.16
  -3   2  14   70.61    2.88
  -3  -2  14   71.85    2.70
   3   2 -14   75.52    3.49
  -3   2  13  102.96    2.87
  -3  -2  13   90.38    3.95
   3   2 -13   93.95    3.97
  -3  -2  13   92.70    3.23
  -3   2  13   91.82    3.61
  -3  -2  13  101.73    3.77
  -3   2  13   94.50    3.33
   3   2 -12  560.42   12.78
  -3  -2  12  551.55   13.51
  -3   2  12  532.28   12.64
   3   2 -12  537.36   13.42
  -3   2  12  549.56   13.06
  -3  -2  12  516.87   13.05
  -3  -2  12  524.21   12.59
  -3  -2  11  104.28    3.70
  -3  -2  11   99.68    3.94
  -3   2  11   99.15    3.59
  -3  -2  11  105.58    3.44
   3   2 -11  107.97    3.51
   3   2 -11  103.35    4.00
  -3   2  11  106.27    3.31
  -3  -2  10  241.88    6.76
   3   2 -10  236.94    6.18
   3  -2 -10  248.77    6.13
  -3   2  10  252.12    5.74
  -3  -2  10  236.06    6.41
  -3  -2  10  226.78    6.13
  -3   2  10  250.61    6.35
   3   2 -10  231.33    6.68
  -3   2  10  236.90    5.97
  -3   2   9   82.15    2.22
  -3  -2   9   95.75    3.47
  -3   2   9   94.82    3.04
   3   2  -9   93.07    3.48
   3   2  -9   92.16    2.99
   3  -2  -9   97.59    2.92
  -3   2   9   90.49    2.20
  -3  -2   9   87.52    3.15
  -3   2   9  101.91    2.66
  -3   2   9   96.84    2.77
  -3  -2   9   93.81    3.05
  -3  -2   8   73.81    2.64
  -3  -2   8   70.28    2.91
  -3   2   8   77.78    1.99
   3   2  -8   75.11    2.97
  -3   2   8   80.53    2.58
  -3   2   8   71.84    2.05
   3  -2  -8   74.65    2.39
   3   2  -8   77.67    2.58
  -3   2   8   84.70    2.29
  -3  -2   8   77.61    2.73
  -3   2   8   72.64    2.26
  -3  -2   7   15.68    1.47
  -3   2   7   16.22    1.08
   3   2  -7   14.96    1.15
   3   2  -7   15.71    1.46
  -3  -2   7   16.13    1.34
   3  -2  -7   15.36    1.01
  -3  -2   7   17.87    1.33
  -3   2   7   14.73    0.94
  -3   2   7   17.09    1.00
  -3   2   7   17.22    0.83
  -3   2   7   16.12    0.90
   3  -2  -6  869.08   18.57
   3  -2  -6  873.30   18.68
  -3   2   6  881.33   18.63
   3   2  -6  884.07   18.80
   3   2  -6  821.44   19.17
  -3  -2   6  878.04   19.17
  -3   2   6  866.51   18.53
  -3  -2   6  866.05   18.92
  -3   2   6  869.71   18.44
  -3  -2   6  882.26   18.94
  -3   2   6  856.65   18.39
   3  -2  -5  193.99    4.51
   3  -2  -5  203.14    4.69
  -3   2   5  193.18    4.33
  -3  -2   5  203.14    5.15
  -3   2   5  193.78    4.53
   3   2  -5  198.76    4.81
  -3   2   5  200.27    4.60
   3   2  -5  192.50    4.31
  -3   2   5  198.76    4.56
  -3  -2   5  189.48    4.89
  -3  -2   5  190.61    4.95
  -3  -2   4   80.43    2.24
  -3  -2   4   79.14    2.64
  -3   2   4   83.53    2.04
  -3  -2   4   81.46    2.60
  -3   2   4   82.27    2.26
   3   2  -4   83.07    2.42
   3   2  -4   79.45    2.10
  -3   2   4   85.93    2.28
  -3  -2   4   80.08    2.47
   3  -2  -4   80.06    2.03
  -3  -2   3  472.40   10.37
  -3   2   3  457.37   10.01
   3  -2  -3  460.69    9.75
  -3  -2   3  456.06   10.22
  -3  -2   3  451.04   10.25
   3   2  -3  475.68   10.00
  -3   2   3  452.86   10.05
   3   2  -3  439.33   10.16
  -3  -2   3  472.92   10.12
  -3  -2   2    0.79    0.75
   3  -2  -2   -0.01    0.30
  -3  -2   2    0.97    0.71
   3  -2  -2    0.46    0.56
  -3  -2   2    0.06    0.74
  -3   2   2   -0.36    0.62
   3  -2  -1    4.65    0.45
   3   2  -1    3.96    0.79
  -3  -2   1    3.76    0.84
  -3   2   1    4.25    0.42
  -3  -2   1    3.77    0.74
   3  -2  -1    3.47    0.60
  -3  -2   1    3.25    0.69
  -3   2   1    2.97    0.66
   3   2   0   60.33    1.89
  -3   2   0   53.26    1.59
  -3  -2   0   52.49    1.93
  -3   2   0   56.52    1.77
   3  -2   0   59.94    1.86
   3   2   0   59.85    1.90
  -3   2  -1  115.37    3.01
  -3  -2  -1  120.73    3.33
   3  -2   1  122.68    3.19
   3   2   1  124.29    3.28
  -3   2  -1  121.28    3.13
  -3  -2  -2  347.76    7.28
   3   2   2  323.54    7.38
  -3   2  -2  331.44    7.66
  -3  -2  -2  348.80    7.94
   3   2   2  352.11    7.88
   3  -2   2  342.72    7.76
  -3   2  -2  329.44    7.68
  -3  -2  -3   84.35    2.93
   3   2   3   95.32    2.88
  -3   2  -3   92.25    2.77
   3  -2   3   94.42    2.76
   3   2   3   92.99    2.26
   3  -2   4 1310.88   27.81
  -3   2  -4 1361.50   27.73
   3   2   4 1281.32   27.01
   3   2   4 1302.97   27.75
   3  -2   4 1261.87   27.59
   3  -2   5 1730.19   36.84
  -3   2  -5 1679.02   36.43
  -3  -2  -5 1641.67   36.67
   3  -2   5 1736.33   36.72
   3   2   5 1745.56   36.60
   3   2   5 1894.53   36.57
  -3   2  -5 1812.09   36.75
   3  -2   5 1679.03   36.41
  -3   2  -5 1786.01   36.58
   3   2   5 1680.29   35.70
   3  -2   6   33.50    1.83
   3  -2   6   30.55    1.61
  -3   2  -6   34.85    1.69
  -3  -2  -6   31.57    1.87
   3   2   6   32.39    1.75
   3  -2   6   35.46    1.99
   3   2   6   37.22    1.76
   3   2   6   34.34    1.82
  -3  -2  -7  118.71    3.79
   3   2   7  120.01    3.78
   3   2   7  112.49    3.62
   3   2   7  118.46    3.59
   3  -2   7  116.73    3.94
  -3   2  -7  122.24    3.55
  -3   2  -7  122.16    3.68
   3  -2   7  115.31    3.45
   3  -2   7  126.05    3.94
  -3  -2  -8    2.75    1.41
   3  -2   8    2.41    1.36
  -3   2  -8    2.86    1.16
   3   2   8   -0.07    1.34
  -3   2  -8    2.97    1.24
   3   2   8    1.54    1.17
   3   2   8    0.78    1.17
   3  -2   8    2.88    1.51
   3  -2   8    0.91    1.08
   3   2   9   56.99    2.42
   3   2   9   54.80    2.76
   3   2   9   53.56    2.64
   3  -2   9   57.02    3.02
   3  -2   9   56.04    2.83
  -3   2  -9   58.07    2.41
   3  -2   9   56.99    2.36
  -3  -2  -9   55.91    2.67
   3   2  10  624.59   14.42
   3  -2  10  595.79   14.56
   3   2  10  581.57   14.08
   3  -2  10  596.53   14.39
  -3   2 -10  600.43   13.64
   3  -2  10  591.82   13.59
  -3  -2 -10  604.25   14.05
   3  -2  11  161.85    5.30
   3   2  11  156.07    5.06
   3  -2  11  172.38    5.60
   3   2  11  164.35    5.34
  -3   2 -11  152.17    4.81
   3  -2  11  157.41    4.56
  -3   2 -11  162.99    4.63
   3   2  11  149.59    4.50
  -3  -2 -11  168.52    5.08
  -3  -2 -12   59.55    2.90
   3   2  12   59.04    2.97
  -3   2 -12   59.28    2.56
   3  -2  12   56.33    2.44
   3  -2  12   54.09    3.08
   3   2  12   48.54    2.32
   3   2  13    3.96    1.32
   3  -2  13    3.88    1.97
  -3   2 -13    3.97    1.53
   3   2  13    0.80    1.69
  -3  -2 -13    2.38    1.73
   3   2  14   66.43    3.48
   3  -2  14   70.46    3.69
  -3  -2 -14   71.15    3.33
  -3   2 -14   72.19    3.03
  -3   3  14    2.64    1.27
   3   3 -14    2.79    1.48
   3   3 -14   -1.34    1.87
  -3  -3  14    2.79    1.77
  -3  -3  14    2.37    1.47
  -3  -3  13  101.33    3.48
  -3  -3  13   97.40    3.88
  -3   3  13   98.65    3.61
   3   3 -13   94.11    3.48
   3   3 -13   85.41    4.00
  -3   3  13   97.60    3.28
  -3  -3  12   -0.40    1.70
  -3   3  12    2.11    1.13
   3   3 -12    1.53    1.72
   3   3 -12    0.53    1.34
  -3  -3  12    1.22    1.51
  -3  -3  12    2.42    1.49
  -3   3  12    2.16    1.31
  -3   3  11  227.90    5.23
  -3  -3  11  215.80    6.42
  -3   3  11  214.73    5.79
   3   3 -11  211.89    5.81
   3   3 -11  208.38    6.39
  -3   3  11  208.00    4.81
  -3  -3  11  213.51    6.13
  -3   3  11  218.96    5.53
  -3  -3  11  205.41    5.79
  -3   3  10   -0.04    0.92
  -3   3  10    0.11    1.09
  -3   3  10    1.00    0.74
   3   3 -10   -0.06    1.20
  -3  -3  10   -0.17    1.57
   3   3 -10    0.98    1.50
  -3  -3  10    1.26    1.36
  -3   3  10    0.91    0.89
  -3  -3  10    0.90    1.40
  -3   3   9   46.52    1.68
  -3  -3   9   40.67    2.36
  -3   3   9   43.66    1.91
  -3   3   9   41.31    1.61
   3   3  -9   42.16    2.07
   3   3  -9   47.19    2.59
  -3  -3   9   39.67    2.12
  -3   3   9   42.50    1.71
  -3  -3   9   41.11    2.21
  -3  -3   8   23.13    1.88
  -3   3   8   23.83    1.35
   3   3  -8   25.51    1.58
  -3   3   8   25.23    1.24
   3   3  -8   21.52    1.88
  -3   3   8   25.69    1.34
  -3  -3   8   23.48    1.72
  -3   3   8   27.13    1.24
   3   3  -7    6.30    1.04
  -3   3   7    8.65    0.85
  -3   3   7    6.88    0.72
   3  -3  -7    7.26    0.97
   3   3  -7    7.23    0.38
  -3   3   7    7.70    0.96
  -3  -3   7    6.49    1.18
  -3   3   7    6.99    0.82
  -3  -3   6  289.83    7.34
  -3   3   6  297.24    6.58
  -3   3   6  292.59    6.47
   3   3  -6  296.36    7.03
   3  -3  -6  290.15    6.68
   3   3  -6  286.04    6.38
  -3  -3   6  303.67    7.21
   3   3  -5 1606.46   33.69
   3   3  -5 1611.08   34.15
  -3   3   5 1636.24   33.56
  -3   3   5 1592.82   33.52
   3  -3  -5 1575.80   33.77
  -3  -3   5 1608.35   34.27
  -3  -3   5 1606.51   34.42
  -3  -3   4  351.12    8.19
   3   3  -4  350.82    7.66
   3  -3  -4  337.09    7.60
  -3   3   4  338.12    7.35
  -3  -3   4  342.62    8.04
   3   3  -4  344.03    7.96
  -3  -3   3  362.53    8.34
   3   3  -3  359.39    8.41
   3   3  -3  358.52    7.99
  -3  -3   3  340.40    8.11
  -3  -3   3  364.64    8.28
  -3   3   3  351.78    7.57
  -3  -3   2   87.60    2.75
   3   3  -2   92.78    2.87
  -3  -3   2   92.44    2.75
  -3  -3   2   87.76    2.68
  -3   3   2   88.98    2.65
   3  -3  -2   90.89    2.20
  -3   3   2   88.64    2.17
   3  -3  -1  988.12   20.63
  -3  -3   1  989.59   21.25
   3  -3  -1  987.52   20.80
  -3  -3   1  968.99   21.14
  -3   3   1  984.36   21.07
   3   3  -1  965.07   21.24
  -3   3   1  982.60   20.72
  -3   3   0  107.79    2.81
   3  -3   0  107.65    2.85
   3   3   0  115.82    3.19
  -3   3   0  114.65    3.06
   3   3   0  106.42    3.14
   3  -3   0  111.86    2.78
  -3  -3   0  111.00    3.26
  -3  -3  -1  145.20    3.54
  -3   3  -1  146.31    3.70
   3  -3   1  147.68    3.75
  -3   3  -1  147.84    3.83
  -3   3  -1  150.76    3.69
   3   3   1  148.42    4.00
  -3  -3  -1  150.48    4.14
  -3   3  -2 2353.02   50.24
   3  -3   2 2353.82   50.39
  -3   3  -2 2323.86   50.25
  -3   3  -2 2422.31   50.29
  -3  -3  -2 2424.22   50.60
  -3  -3  -2 2419.71   49.83
   3   3   2 2429.37   50.48
  -3   3  -3 1181.56   25.54
   3   3   3 1191.55   25.63
   3  -3   3 1162.77   25.50
  -3  -3  -3 1180.08   25.76
  -3  -3  -3 1210.26   24.82
  -3   3  -3 1139.90   25.42
   3  -3   4  313.89    7.80
  -3   3  -4  335.67    7.85
   3  -3   4  318.92    7.68
  -3   3  -4  330.35    7.74
   3   3   4  326.93    7.82
  -3   3  -5   94.31    2.97
  -3   3  -5   97.99    3.15
  -3   3  -5  103.41    3.30
   3  -3   5   94.15    3.03
   3   3   5  107.32    3.24
   3  -3   5  101.35    3.27
  -3   3  -6   33.06    1.67
  -3   3  -6   31.69    1.83
   3  -3   6   34.06    2.04
   3  -3   6   37.22    1.97
  -3   3  -6   32.92    1.90
   3   3   6   32.96    1.80
   3  -3   6   32.45    1.72
  -3  -3  -6   32.55    2.01
   3   3   6   35.72    1.71
  -3  -3  -7   -0.56    1.36
   3  -3   7    0.50    1.24
   3   3   7    0.34    1.17
   3  -3   7   -0.39    1.42
  -3   3  -7   -0.66    1.19
  -3   3  -7    0.85    1.11
  -3   3  -7   -0.21    1.29
   3   3   7    0.84    1.22
   3  -3   7   -1.02    1.07
   3  -3   8    0.70    1.16
   3  -3   8   -0.35    1.61
   3  -3   8    0.32    1.44
   3   3   8    0.12    1.28
  -3   3  -8    0.20    1.32
   3   3   8   -0.48    1.24
  -3   3  -8   -0.31    1.39
  -3  -3  -8   -0.44    1.46
  -3   3  -8    0.55    1.18
  -3   3  -9  588.06   13.31
  -3  -3  -9  549.37   13.08
   3   3   9  529.54   12.66
   3  -3   9  526.47   13.38
   3   3   9  546.94   12.96
  -3   3  -9  546.44   12.56
   3   3   9  565.50   13.15
   3  -3   9  544.02   13.25
   3  -3   9  549.93   12.64
   3   3  10  161.68    4.65
   3   3  10  156.11    4.94
  -3  -3 -10  155.41    5.00
   3   3  10  165.75    5.16
  -3   3 -10  157.62    4.54
   3  -3  10  153.93    4.58
   3  -3  10  157.93    5.40
   3  -3  10  158.76    5.25
   3   3  11  203.84    5.44
   3   3  11  189.85    5.81
   3   3  11  190.88    6.02
  -3  -3 -11  201.16    5.92
  -3   3 -11  197.76    5.37
   3  -3  11  187.71    6.14
  -3  -3 -12    1.23    1.63
   3  -3  12   -0.11    1.72
   3   3  12    0.63    1.33
   3   3  12   -0.27    1.53
  -3   3 -12    1.74    1.35
   3   3  13   51.20    2.39
  -3   3 -13   53.99    2.50
   3  -3  13   51.72    3.24
  -3  -3 -13   54.68    2.99
   3   3  13   47.41    2.88
   3   4 -14    3.20    2.05
  -3  -4  14    2.23    1.75
  -3  -4  14    6.75    1.82
  -3  -4  13    3.16    1.71
  -3   4  13    0.23    1.19
   3   4 -13    0.11    1.86
   3   4 -13   -0.15    1.45
  -3  -4  13    1.00    1.69
  -3   4  12    2.85    0.82
  -3   4  12    3.44    1.16
  -3   4  12    6.62    1.35
   3   4 -12    3.75    1.53
   3   4 -12    4.76    1.90
  -3  -4  12    3.68    1.63
  -3  -4  12    4.09    1.67
  -3  -4  12    6.42    1.89
  -3   4  11  371.38    8.60
  -3  -4  11  377.32    9.73
  -3  -4  11  353.12    9.39
   3   4 -11  370.45    9.74
  -3   4  11  342.35    8.19
  -3   4  11  386.47    8.86
   3   4 -11  363.13    9.03
  -3  -4  11  368.25    9.10
  -3   4  10   76.00    2.67
  -3  -4  10   75.24    3.38
  -3   4  10   74.91    2.43
  -3   4  10   76.23    2.51
   3   4 -10   73.49    3.35
  -3  -4  10   73.66    3.15
   3   4 -10   73.86    2.94
  -3   4   9  264.08    6.29
   3   4  -9  271.74    7.45
  -3   4   9  254.44    6.40
  -3  -4   9  261.75    7.13
   3   4  -9  266.64    6.85
  -3  -4   9  262.83    7.30
  -3   4   9  276.71    6.48
   3   4  -8    0.29    1.15
   3   4  -8    0.53    0.49
  -3   4   8    0.36    0.73
  -3   4   8   -0.57    1.08
   3  -4  -8    0.47    0.92
  -3  -4   8    0.71    1.33
  -3   4   8   -0.31    0.81
  -3  -4   8    0.87    1.36
   3   4  -8    0.16    0.44
   3   4  -7  135.27    3.99
  -3  -4   7  139.98    4.36
  -3   4   7  147.28    3.47
   3   4  -7  132.71    3.32
  -3   4   7  139.18    3.43
   3  -4  -7  130.94    3.51
  -3  -4   7  136.77    4.20
  -3  -4   6   13.09    1.37
  -3   4   6   14.03    0.73
  -3  -4   6   12.08    1.45
   3   4  -6   13.75    0.93
  -3   4   6   14.31    0.78
   3   4  -6   13.56    1.28
   3  -4  -6   14.90    0.97
   3   4  -5   40.83    1.57
  -3   4   5   41.55    1.35
   3  -4  -5   41.39    1.45
  -3  -4   5   38.02    1.92
  -3  -4   5   41.42    2.06
   3   4  -5   38.64    1.80
  -3  -4   4   72.08    2.64
   3   4  -4   68.99    2.71
   3   4  -4   71.37    2.47
   3  -4  -4   71.15    2.05
   3   4  -4   73.96    2.31
  -3  -4   4   71.81    2.60
  -3   4   4   69.07    1.93
   3   4  -3  314.00    7.75
  -3  -4   3  301.59    7.63
   3   4  -3  329.58    7.46
  -3  -4   3  333.90    7.68
  -3   4   3  310.26    6.98
   3   4  -2  116.94    3.59
   3  -4  -2  122.33    3.01
  -3  -4   2  125.28    3.58
  -3   4   2  116.50    2.95
  -3  -4   2  114.35    3.50
  -3   4   1    1.24    0.72
   3   4  -1    0.05    1.05
  -3  -4   1    0.65    1.11
   3  -4  -1    1.22    0.57
  -3   4   1    1.94    0.52
  -3  -4   1   -0.10    1.32
  -3   4   1    1.43    1.13
   3  -4  -1    1.38    0.77
   3   4   0 1172.46   24.69
  -3   4   0 1153.34   24.30
  -3   4   0 1121.32   24.16
   3   4   0 1113.16   24.68
  -3   4   0 1175.11   24.59
  -3  -4   0 1141.83   24.85
   3  -4   0 1148.30   24.42
   3  -4   0 1136.92   24.21
   3   4   1 2546.84   53.33
   3  -4   1 2530.14   53.09
  -3  -4  -1 2511.10   53.60
  -3   4  -1 2527.76   53.04
  -3   4  -1 2512.77   53.24
  -3   4  -1 2545.13   53.11
  -3  -4  -2  440.24   10.32
  -3   4  -2  439.70    9.86
   3  -4   2  433.17    9.88
   3   4   2  426.38   10.11
  -3   4  -2  429.76    9.85
  -3  -4  -2  426.44    9.45
  -3   4  -2  442.99    9.86
  -3  -4  -3    6.74    1.45
  -3   4  -3    7.27    1.12
   3  -4   3    7.30    1.20
  -3   4  -3    6.23    1.17
   3   4   3    5.35    1.28
  -3  -4  -3    7.39    0.63
  -3  -4  -4  679.36   14.22
  -3   4  -4  681.70   15.23
   3   4   4  675.95   15.27
  -3   4  -4  670.14   15.11
  -3   4  -5   29.63    1.77
   3   4   5   26.18    1.71
  -3   4  -5   28.23    1.77
  -3   4  -5   31.59    1.63
   3  -4   5   26.71    1.74
  -3   4  -6   34.62    1.81
  -3   4  -6   35.80    1.96
  -3   4  -6   37.13    2.05
   3   4   6   37.50    2.00
   3  -4   6   38.95    2.07
  -3  -4  -6   38.90    2.26
  -3   4  -7  533.46   12.28
  -3  -4  -7  530.82   12.55
   3   4   7  519.07   12.04
  -3   4  -7  522.51   12.46
   3  -4   7  523.76   12.50
   3   4   7  537.02   12.25
  -3   4  -7  502.46   11.86
   3   4   8  189.14    5.37
   3  -4   8  186.74    5.61
  -3   4  -8  187.86    5.07
   3  -4   8  179.86    5.79
   3   4   8  200.66    5.37
  -3  -4  -8  182.43    5.62
  -3   4  -8  180.55    5.58
   3   4   8  186.61    5.32
  -3   4  -8  186.27    5.43
   3  -4   9   -0.37    1.49
   3   4   9   -0.46    1.40
   3  -4   9    0.40    1.83
   3   4   9   -0.79    1.43
   3   4   9    0.89    1.45
  -3   4  -9    0.09    1.67
  -3   4  -9   -0.60    1.49
  -3  -4  -9    1.97    1.70
  -3   4  -9    0.70    1.31
  -3  -4 -10   43.95    2.70
   3  -4  10   38.33    2.69
   3  -4  10   40.36    2.84
   3   4  10   40.17    2.38
   3   4  10   42.51    2.31
   3   4  10   38.80    2.43
  -3   4 -10   43.17    2.60
  -3   4 -10   40.89    2.15
  -3   4 -11    1.93    1.35
   3  -4  11    0.32    1.76
   3   4  11    2.90    1.66
   3   4  11   -0.86    1.55
  -3   4 -11    1.83    1.76
  -3  -4 -11    0.74    1.79
   3   4  11   -0.20    1.45
   3   4  12   79.98    3.14
   3   4  12   76.39    3.50
  -3   4 -12   86.09    3.07
   3  -4  12   89.68    3.97
   3   4  13    8.89    1.91
   3   4  13    6.17    1.51
  -3   4 -13    6.45    1.52
   3  -4  13    8.47    2.25
  -3  -5  14    0.57    1.80
   3   5 -14   -0.50    2.10
  -3  -5  14    1.93    1.92
  -3   5  13    2.84    1.21
   3   5 -13    0.12    2.01
  -3  -5  13    4.94    1.88
  -3  -5  13    2.81    1.82
  -3   5  12  444.40   10.19
  -3   5  12  445.79   10.32
   3   5 -12  439.24   10.74
  -3  -5  12  451.69   10.87
   3   5 -12  426.08   11.44
  -3   5  12  407.04    9.79
  -3  -5  12  468.72   11.35
  -3   5  11  157.37    4.38
  -3  -5  11  167.92    5.61
  -3   5  11  180.83    4.67
   3   5 -11  164.92    5.66
  -3  -5  11  162.18    5.43
   3   5 -11  165.76    5.06
  -3   5  11  169.89    4.51
  -3   5  10   34.10    1.66
  -3   5  10   37.98    1.74
   3   5 -10   35.70    2.55
  -3  -5  10   34.85    2.56
  -3   5  10   34.20    1.80
  -3  -5  10   31.60    2.37
   3   5 -10   40.89    2.32
   3   5  -9  157.87    3.79
  -3  -5   9  172.29    5.35
  -3   5   9  171.70    4.25
  -3   5   9  167.04    4.61
  -3  -5   9  167.94    5.20
   3  -5  -9  163.58    4.22
  -3   5   9  168.52    4.24
   3   5  -9  171.02    4.90
   3   5  -9  156.87    3.72
  -3  -5   8    2.96    1.56
   3   5  -8    2.49    1.24
  -3   5   8    1.27    0.75
  -3   5   8    1.88    1.24
   3  -5  -8    1.59    0.92
   3   5  -8    2.18    0.80
  -3   5   8    1.87    0.82
   3   5  -8    2.04    0.70
  -3  -5   8    1.42    1.49
  -3  -5   7   34.12    2.22
  -3   5   7   35.65    1.25
  -3   5   7   35.35    1.35
   3  -5  -7   35.50    1.45
   3   5  -7   36.06    1.52
  -3  -5   7   37.91    2.23
   3   5  -7   35.73    2.01
   3   5  -6  271.48    6.59
  -3   5   6  273.11    5.95
  -3  -5   6  282.21    7.32
  -3   5   6  273.92    6.01
   3   5  -6  289.72    7.47
   3  -5  -6  285.97    6.38
  -3   5   6  288.21    6.46
   3   5  -6  290.49    7.09
  -3  -5   6  281.71    7.25
   3   5  -5   95.35    3.53
  -3  -5   5   99.32    3.41
   3   5  -5  105.07    3.30
   3  -5  -5  102.21    2.70
  -3   5   5   97.08    2.72
  -3  -5   5  100.41    3.40
   3   5  -5  107.25    3.06
   3  -5  -4  576.07   12.22
   3   5  -4  560.17   12.62
   3   5  -4  569.18   13.09
  -3  -5   4  568.38   12.93
  -3   5   4  544.15   12.21
  -3  -5   4  547.31   12.90
  -3  -5   3   58.32    2.33
   3   5  -3   58.63    2.45
  -3  -5   3   55.34    2.33
  -3   5   3   53.99    1.80
   3   5  -3   61.44    2.30
   3  -5  -2 1154.20   23.93
   3   5  -2 1129.82   24.89
  -3  -5   2 1184.14   24.90
  -3  -5   2 1144.18   24.95
   3  -5  -2 1155.51   24.42
  -3   5   2 1134.18   23.94
   3   5  -2 1132.38   25.03
  -3   5   2 1146.73   24.37
  -3  -5   1   64.66    2.44
   3   5  -1   67.95    2.59
   3  -5  -1   65.98    1.86
  -3   5   1   67.87    1.87
  -3   5   1   66.00    2.12
   3   5  -1   68.91    2.56
   3  -5  -1   68.97    2.20
   3  -5   0 1323.86   28.58
  -3   5   0 1356.16   28.73
  -3   5   0 1348.82   28.57
  -3   5   0 1365.18   29.03
   3   5   0 1349.38   29.17
   3   5   0 1358.11   29.12
   3  -5   0 1364.43   28.88
   3  -5   1   64.38    2.33
   3  -5   1   66.46    2.17
  -3  -5  -1   59.67    2.71
   3   5   1   61.89    2.61
   3   5   1   58.93    2.44
  -3   5  -1   63.21    2.38
  -3   5  -1   63.63    2.20
   3   5   1   62.98    2.42
  -3   5  -1   63.94    2.14
   3  -5   2   70.92    2.40
  -3   5  -2   65.75    2.37
   3   5   2   66.19    2.68
  -3   5  -2   64.62    2.43
  -3   5  -2   68.42    2.37
   3   5   2   68.36    2.51
  -3   5  -3  103.25    3.15
  -3   5  -3  100.55    3.18
  -3  -5  -3   98.99    3.61
   3  -5   3  100.20    3.19
  -3  -5  -3  100.29    2.60
  -3  -5  -4 1204.56   24.86
   3  -5   4 1172.15   25.93
  -3   5  -4 1172.05   25.75
  -3   5  -4 1201.56   25.92
  -3   5  -4 1143.90   25.55
   3   5   4 1183.24   25.98
  -3   5  -5   10.61    1.25
  -3  -5  -5   11.24    0.42
  -3   5  -5   11.06    1.41
   3  -5   5    8.29    1.42
  -3   5  -5   12.81    1.46
   3   5   5    9.58    1.44
  -3   5  -6  566.03   12.93
  -3   5  -6  580.78   13.20
   3  -5   6  539.58   13.11
   3   5   6  541.40   12.97
  -3  -5  -6  563.27   13.37
  -3   5  -6  551.29   12.60
  -3   5  -7   11.72    1.43
  -3   5  -7   11.33    1.70
   3   5   7   11.94    1.61
  -3  -5  -7   11.98    1.98
   3  -5   7   10.53    1.72
  -3   5  -7   11.39    1.77
  -3   5  -8   12.11    1.79
   3  -5   8   13.60    1.88
  -3   5  -8   10.54    1.50
  -3   5  -8   11.00    1.89
   3   5   8   10.88    1.54
   3   5   8    8.36    1.38
  -3  -5  -8   11.33    2.02
   3   5   8   12.60    1.80
  -3   5  -9  183.60    5.08
  -3   5  -9  186.05    5.59
   3   5   9  181.37    5.38
  -3   5  -9  178.89    5.73
   3   5   9  188.79    5.44
  -3  -5  -9  184.02    5.81
   3  -5   9  184.84    5.88
   3  -5  10   61.46    3.43
   3  -5  10   58.47    3.25
   3   5  10   64.34    2.94
   3   5  10   55.31    2.76
  -3   5 -10   62.18    3.21
   3  -5  11  235.49    7.22
   3   5  11  237.05    6.73
  -3   5 -11  232.20    6.20
   3   5  11  227.74    6.71
  -3   5 -11  245.69    7.16
   3   5  11  234.46    6.48
   3   5  12  173.11    5.21
  -3   5 -12  178.62    5.05
  -3   5 -12  184.59    6.02
   3   5  12  170.08    5.58
   3  -5  12  185.72    6.23
   3  -5  13    1.81    2.08
   3   5  13    2.67    1.76
   3   5  13    3.18    1.58
  -3   5 -13    3.51    1.45
  -3  -6  13   27.59    2.49
   3   6 -13   22.47    2.53
  -3  -6  13   21.48    2.47
  -3   6  12   58.31    2.33
   3   6 -12   55.35    3.37
  -3  -6  12   61.43    3.26
  -3   6  12   55.12    2.23
   3   6 -11   49.67    2.69
  -3   6  11   58.32    2.18
  -3   6  11   54.00    2.17
  -3   6  11   53.80    2.28
   3   6 -11   53.90    3.26
  -3  -6  11   61.70    3.21
  -3   6  10   67.62    2.32
  -3  -6  10   62.03    3.26
   3   6 -10   59.91    2.88
  -3   6  10   66.48    2.20
  -3   6  10   60.48    2.57
  -3  -6  10   72.62    3.33
   3   6 -10   60.64    1.75
   3   6 -10   61.16    1.86
  -3  -6   9  216.91    6.56
  -3   6   9  215.81    5.94
  -3   6   9  220.35    5.35
   3   6  -9  213.91    6.07
   3  -6  -9  212.67    5.26
   3   6  -9  210.35    5.20
   3   6  -9  220.98    5.06
  -3  -6   9  221.00    6.49
  -3   6   9  216.48    5.22
  -3   6   8  251.02    6.01
  -3   6   8  263.04    6.40
  -3  -6   8  267.56    7.38
   3   6  -8  265.45    6.35
  -3  -6   8  266.72    7.44
   3   6  -8  268.20    7.02
   3  -6  -8  263.34    6.16
  -3   6   8  273.59    7.13
  -3   6   8  269.91    6.21
  -3   6   7   27.41    0.92
  -3   6   7   27.51    0.99
  -3  -6   7   28.59    2.25
  -3   6   7   26.87    1.46
  -3  -6   7   29.86    2.16
   3  -6  -7   28.39    1.31
   3   6  -7   27.33    1.92
   3   6  -7   28.77    1.62
   3   6  -7   30.50    2.32
   3   6  -6   99.59    3.74
   3  -6  -6   98.35    2.69
  -3   6   6   91.43    2.82
  -3  -6   6   93.57    3.56
   3   6  -6  104.28    3.43
   3   6  -6   96.77    3.11
  -3  -6   6   98.50    3.63
   3  -6  -5   41.31    1.57
   3   6  -5   42.65    2.38
  -3  -6   5   37.38    2.24
  -3  -6   5   41.61    2.28
  -3   6   5   39.05    1.61
   3   6  -5   40.40    1.95
   3   6  -5   39.53    2.11
   3  -6  -4   21.43    1.18
  -3  -6   4   25.05    1.73
  -3  -6   4   25.03    1.79
  -3   6   4   21.11    1.23
   3   6  -4   23.23    1.68
   3   6  -4   24.07    1.89
   3   6  -3  373.23    8.96
  -3  -6   3  362.51    8.92
  -3   6   3  369.70    8.43
   3   6  -3  373.55    9.13
  -3  -6   3  358.99    9.04
   3  -6  -2 1013.90   21.17
  -3  -6   2  976.64   22.06
   3   6  -2  999.24   22.30
  -3   6   2  993.01   21.22
  -3  -6   2 1008.69   22.26
  -3   6   2 1017.20   21.68
   3  -6  -2 1039.05   21.74
   3   6  -1   86.33    3.07
  -3   6   1   89.04    2.41
   3  -6  -1   91.16    2.39
   3  -6  -1   88.81    2.79
   3   6  -1   85.66    3.12
  -3   6   1   86.04    2.67
   3   6   0    4.43    1.16
  -3   6   0    4.41    0.83
   3  -6   0    3.55    1.04
   3   6   0    7.12    1.35
  -3   6   0    5.07    0.97
   3  -6   0    4.93    0.81
  -3   6  -1 2401.95   50.34
   3  -6   1 2404.17   50.23
  -3   6  -1 2360.00   50.23
  -3   6  -1 2354.44   50.54
   3   6   1 2353.78   50.74
   3   6   1 2424.86   50.84
   3  -6   1 2383.33   50.55
   3   6   1 2382.10   50.61
   3   6   2   86.95    3.02
  -3   6  -2   90.95    2.89
   3  -6   2   83.55    2.81
   3   6   2   84.21    3.19
   3   6   2   87.19    3.14
  -3   6  -2   88.03    2.86
   3  -6   2   82.68    3.01
   3   6   3   74.31    2.72
  -3   6  -3   73.22    2.66
   3  -6   3   74.89    2.74
  -3   6  -3   75.99    2.74
   3   6   3   70.22    2.97
   3   6   4   17.20    1.75
   3  -6   4   18.74    1.70
  -3   6  -4   18.43    1.69
  -3   6  -4   18.42    1.52
  -3  -6  -4   18.24    0.97
  -3   6  -4   20.98    1.62
  -3  -6  -5  178.19    3.91
   3   6   5  178.04    5.24
  -3   6  -5  179.08    5.07
   3  -6   5  176.44    5.23
  -3   6  -5  175.75    5.17
  -3   6  -5  166.13    4.75
  -3   6  -6  148.57    4.51
   3  -6   6  145.67    4.77
   3   6   6  141.35    4.59
  -3   6  -6  157.84    4.77
  -3   6  -6  144.75    4.22
  -3   6  -7  356.46    8.63
  -3   6  -7  357.60    9.04
  -3   6  -7  367.32    9.33
   3   6   7  355.66    9.05
   3  -6   7  345.59    9.31
   3  -6   7  364.14    9.31
  -3   6  -8  176.17    4.94
   3  -6   8  170.15    5.56
  -3   6  -8  182.41    5.38
  -3   6  -8  177.84    5.64
   3   6   8  174.51    5.33
   3   6   9   23.47    2.03
  -3   6  -9   20.01    1.76
  -3   6  -9   20.33    2.13
  -3   6  -9   24.73    2.30
   3   6   9   21.67    1.86
   3   6   9   21.41    1.82
   3  -6   9   21.79    2.28
   3   6  10  348.99    8.99
  -3   6 -10  341.56    8.55
  -3   6 -10  354.45    9.50
   3   6  10  339.78    8.92
   3   6  10  361.71    9.02
   3  -6  10  354.09    9.63
   3  -6  11    0.12    1.92
   3   6  11    0.69    1.65
  -3   6 -11   -0.44    1.91
  -3   6 -11   -0.97    1.47
   3   6  11   -0.09    1.52
   3   6  11   -1.20    1.57
   3  -6  12    2.31    2.01
  -3   6 -12    2.30    1.46
   3   6  12    1.59    1.69
  -3   6 -12    2.08    1.84
   3   6  12    5.37    1.74
  -3  -7  13    9.33    2.22
   3   7 -13    6.64    2.29
  -3   7  12   55.03    2.39
   3   7 -12   60.44    3.53
  -3  -7  12   56.60    3.39
  -3   7  11    5.16    1.27
   3   7 -11    4.59    0.76
  -3   7  11    4.38    1.19
  -3   7  11    7.56    1.49
  -3  -7  11    6.42    2.01
   3   7 -11    4.39    0.85
   3  -7 -10   42.02    1.75
   3   7 -10   43.74    2.57
  -3   7  10   40.45    2.36
  -3   7  10   45.07    1.64
  -3   7  10   41.05    1.86
   3   7 -10   40.69    1.75
  -3   7  10   42.91    2.00
  -3  -7  10   39.14    2.77
   3   7 -10   38.58    1.51
   3   7  -9  186.09    5.49
  -3   7   9  177.06    4.30
  -3   7   9  182.99    5.46
  -3   7   9  186.39    4.64
   3  -7  -9  182.50    4.50
  -3  -7   9  186.43    5.86
  -3   7   9  177.84    4.84
   3   7  -9  185.64    4.54
   3   7  -9  175.48    4.73
  -3   7   9  172.64    4.17
  -3  -7   9  181.57    5.92
  -3  -7   8   21.29    2.19
   3   7  -8   20.35    1.88
  -3   7   8   17.45    0.88
  -3  -7   8   16.19    1.97
   3   7  -8   19.64    2.31
  -3   7   8   23.10    2.17
  -3   7   8   16.77    0.79
   3   7  -8   19.92    1.57
   3  -7  -8   20.83    1.22
  -3   7   8   17.71    1.41
   3   7  -7   83.95    2.97
  -3  -7   7   85.88    3.57
   3   7  -7   84.03    3.63
   3   7  -7   88.12    3.34
   3  -7  -7   79.82    2.42
  -3   7   7   81.13    2.72
  -3  -7   7   76.71    3.47
  -3  -7   6   44.42    2.53
   3   7  -6   41.84    2.20
   3   7  -6   40.40    2.61
   3   7  -6   45.96    2.35
  -3  -7   6   47.08    2.65
  -3   7   6   43.21    1.88
   3  -7  -6   42.46    1.64
   3  -7  -5   98.36    2.77
  -3  -7   5   99.74    3.64
   3   7  -5   92.78    3.73
   3   7  -5   98.17    3.41
  -3  -7   5   96.75    3.72
  -3   7   5  100.05    3.02
  -3  -7   4   28.56    2.00
   3   7  -4   30.81    2.16
   3   7  -4   36.86    2.14
  -3  -7   4   30.49    2.14
  -3   7   4   31.78    1.60
   3   7  -3   62.14    2.76
   3   7  -3   70.60    2.93
  -3   7   3   63.72    1.71
  -3  -7   3   66.37    2.83
  -3   7   3   63.07    2.29
   3   7  -2  155.92    4.81
  -3   7   2  154.89    4.22
   3   7  -2  162.94    4.80
  -3   7   2  154.83    3.78
   3  -7  -2  157.12    3.68
  -3  -7   2  157.85    4.78
   3  -7  -2  158.82    4.27
   3   7  -2  154.40    4.72
   3   7  -1  102.65    3.59
  -3   7   1  103.51    2.86
  -3   7   1  109.05    3.20
   3  -7  -1  104.96    3.25
   3   7  -1  103.86    3.63
   3  -7  -1  102.00    2.80
   3   7   0  117.67    3.86
   3  -7   0  124.81    3.35
  -3   7   0  117.58    3.35
   3   7   0  117.78    3.94
   3  -7   0  117.27    3.70
  -3   7   0  124.11    3.58
  -3   7  -1    7.02    1.07
  -3   7  -1    8.86    1.20
   3  -7   1    8.87    1.11
   3   7   1    7.25    1.51
   3   7   1    8.22    1.48
   3  -7   1    9.14    1.30
   3   7   1    6.71    1.31
  -3   7  -2  158.49    4.53
   3  -7   2  167.66    4.57
  -3   7  -2  163.92    4.60
   3   7   2  158.68    5.03
   3   7   2  167.87    4.94
   3  -7   2  170.67    4.90
   3   7   2  159.11    4.76
   3   7   3   28.92    1.90
   3  -7   3   25.21    1.90
   3  -7   3   28.04    1.77
  -3   7  -3   26.59    1.78
   3   7   3   27.28    2.04
   3   7   3   25.43    2.05
  -3   7  -3   29.35    1.83
   3   7   4  135.69    4.16
  -3   7  -4  135.32    4.27
   3   7   4  127.19    4.47
  -3   7  -4  132.90    4.08
  -3   7  -4  131.24    4.20
   3  -7   4  139.55    4.26
   3   7   5  242.39    6.37
   3   7   5  224.03    6.60
   3  -7   5  241.52    6.60
  -3   7  -5  239.85    6.41
  -3   7  -5  239.59    6.60
  -3   7  -5  236.40    6.23
  -3  -7  -5  237.58    5.35
  -3   7  -6    2.80    1.33
   3   7   6    1.84    1.61
   3  -7   6    1.19    1.63
  -3   7  -6    4.21    1.63
  -3  -7  -6    1.57    0.31
  -3   7  -6    2.98    1.49
   3  -7   7   15.54    2.03
   3  -7   7   16.54    2.06
  -3   7  -7   12.47    1.73
  -3   7  -7   15.84    2.00
   3   7   7   12.95    1.81
  -3   7  -7   15.67    1.65
  -3   7  -8   88.97    3.62
   3   7   8   93.91    3.66
  -3   7  -8   86.56    3.77
   3  -7   8   83.76    3.72
   3  -7   8   91.69    3.93
  -3   7  -8   89.24    3.20
  -3   7  -9   30.93    2.07
   3   7   9   28.99    2.02
   3  -7   9   34.80    2.71
   3   7   9   28.16    2.30
  -3   7  -9   33.13    2.54
   3   7   9   25.07    1.93
   3  -7   9   29.86    2.53
   3  -7  10   82.50    3.90
   3   7  10   75.17    3.20
  -3   7 -10   82.86    3.83
   3   7  10   83.19    3.31
  -3   7 -10   87.32    3.11
   3   7  10   80.29    3.44
   3   7  11   32.19    2.44
  -3   7 -11   33.75    2.87
  -3   7 -11   30.92    2.13
   3  -7  11   35.73    2.93
   3   7  11   33.13    2.31
   3   7  11   31.27    2.30
   3  -7  12    2.42    2.06
   3   7  12    1.47    1.69
  -3   7 -12    4.46    1.96
  -3   7 -12    1.97    1.51
   3   7  12    3.52    1.74
   3   8 -12   49.15    1.68
  -3  -8  12   62.60    3.56
   3   8 -11   76.82    2.30
  -3   8  11   83.68    2.78
   3   8 -11   81.84    2.62
  -3   8  11   76.27    3.21
  -3  -8  11   80.28    3.94
  -3   8  10  192.37    5.06
   3   8 -10  198.85    4.86
   3   8 -10  197.22    5.17
  -3   8  10  190.22    5.31
  -3  -8  10  193.67    6.40
   3  -8 -10  196.43    4.86
  -3   8  10  197.47    5.90
   3   8  -9  162.95    5.02
  -3   8   9  148.88    3.43
  -3   8   9  167.93    5.22
  -3   8   9  153.70    3.98
   3   8  -9  162.57    4.43
   3   8  -9  160.73    4.14
  -3   8   9  148.90    4.30
  -3  -8   9  153.75    5.37
   3  -8  -9  158.53    3.87
   3   8  -9  160.23    5.56
   3   8  -8   62.99    2.96
   3   8  -8   64.29    3.33
  -3   8   8   57.23    2.42
  -3  -8   8   59.90    3.21
   3  -8  -8   60.82    2.05
  -3  -8   8   68.89    3.28
   3   8  -8   62.59    2.66
  -3   8   8   68.71    3.48
  -3  -8   7    8.02    1.89
   3  -8  -7    7.45    1.01
  -3   8   7    4.35    1.19
   3   8  -7    5.42    1.87
   3   8  -7    9.00    1.61
   3   8  -7    4.63    1.62
  -3  -8   7    5.85    1.88
   3   8  -6   35.12    2.53
   3   8  -6   35.94    2.25
   3  -8  -6   36.33    1.60
  -3  -8   6   39.91    2.56
  -3   8   6   35.67    1.87
  -3  -8   6   37.73    2.51
   3   8  -6   37.55    2.32
   3   8  -5  138.57    4.89
   3   8  -5  140.35    4.51
  -3  -8   5  140.68    4.82
  -3   8   5  143.20    4.04
  -3  -8   5  141.75    4.64
   3  -8  -5  135.24    3.68
   3   8  -4  443.82   11.10
   3   8  -4  460.54   10.88
  -3   8   4  431.81    9.44
  -3   8   4  452.23   10.30
  -3  -8   4  448.93   11.06
   3   8  -3  185.28    5.64
   3   8  -3  182.63    5.57
  -3  -8   3  181.38    5.65
  -3   8   3  189.41    4.41
  -3   8   3  190.10    5.06
   3   8  -2   28.36    2.24
   3   8  -2   31.62    2.11
  -3   8   2   31.09    1.36
   3  -8  -2   29.26    1.74
   3   8  -2   30.60    2.16
  -3   8   2   32.04    1.75
   3  -8  -2   32.32    1.24
   3  -8  -1   93.03    2.65
   3   8  -1   89.48    3.39
  -3   8   1   91.25    3.06
  -3   8   1   89.44    2.73
   3  -8  -1   94.37    3.20
   3   8  -1   95.10    3.48
  -3  -8   1   86.69    3.25
   3  -8   0    1.22    0.87
  -3   8   0    0.77    0.96
   3  -8   0    0.27    1.19
   3   8   0   -0.79    1.35
   3   8   0    1.20    1.34
  -3   8   0   -0.29    1.09
  -3   8  -1   44.44    2.19
   3  -8   1   46.04    2.03
  -3   8  -1   43.37    2.06
   3  -8   1   44.51    2.36
   3   8   1   50.16    2.59
   3   8   1   46.64    2.43
   3   8   1   50.09    2.74
   3  -8   2   45.92    2.11
  -3   8  -2   41.30    2.11
   3   8   2   40.31    2.26
   3   8   2   43.19    2.46
  -3   8  -2   41.83    2.14
   3   8   2   43.05    2.59
   3  -8   2   42.70    2.38
   3   8   3   27.57    1.95
  -3   8  -3   23.68    1.79
   3   8   3   25.39    2.17
   3   8   3   25.34    2.22
   3  -8   3   28.81    2.12
  -3   8  -3   22.44    1.85
   3  -8   3   27.07    1.85
  -3   8  -4   -1.06    1.36
   3   8   4    0.72    1.34
   3  -8   4   -0.44    1.33
  -3   8  -4   -0.15    1.40
   3   8   4    0.34    1.54
   3   8   4   -1.56    1.72
  -3   8  -4   -0.28    1.34
   3  -8   4   -2.08    1.49
   3   8   5  309.46    7.87
  -3   8  -5  302.71    7.95
  -3   8  -5  300.06    8.08
   3   8   5  305.06    8.31
  -3   8  -5  310.33    7.77
   3  -8   5  295.65    8.01
  -3   8  -6   11.27    1.90
   3   8   6   12.29    1.65
   3  -8   6   10.38    1.81
  -3   8  -6    9.83    1.58
   3   8   6   11.29    1.95
  -3  -8  -6   10.91    0.70
  -3   8  -6   13.16    1.79
  -3   8  -7   29.01    2.00
   3  -8   7   30.63    2.45
  -3   8  -7   27.29    2.25
  -3   8  -7   30.29    2.43
   3   8   7   30.08    2.13
   3   8   7   31.92    2.45
   3   8   8  608.51   14.69
   3  -8   8  611.00   15.03
  -3   8  -8  630.26   14.65
  -3   8  -8  600.00   14.06
  -3   8  -8  631.84   14.98
   3  -8   8  593.60   15.04
  -3   8  -9    0.38    1.42
   3   8   9    0.65    1.75
  -3   8  -9    0.54    1.85
   3  -8   9   -0.70    1.90
   3  -8  10    0.13    1.91
  -3   8 -10    2.57    1.55
  -3   8 -10    1.59    2.00
   3   8  10    1.99    1.43
   3   8  10    0.30    1.36
   3   8  10    0.37    1.73
  -3   8 -11  131.35    5.02
  -3   8 -11  122.37    4.09
   3   8  11  131.91    4.63
   3  -8  11  120.48    5.11
   3   9 -11   18.83    1.30
  -3  -9  11   17.95    2.53
   3   9 -11   19.59    1.62
   3  -9 -11   20.85    1.36
  -3   9  11   20.23    2.18
  -3   9  10   54.92    3.09
  -3  -9  10   52.01    3.26
   3   9 -10   49.52    2.06
   3   9 -10   50.39    3.34
   3   9 -10   52.96    2.41
  -3   9  10   48.05    2.04
   3  -9 -10   46.48    1.85
   3  -9  -9   -0.29    0.93
  -3   9   9    5.68    2.15
   3   9  -9    0.90    1.96
   3   9  -9   -0.55    1.39
   3   9  -9    0.67    1.15
  -3  -9   9   -1.43    1.97
  -3   9   9    0.79    1.27
   3   9  -8  104.61    4.42
   3   9  -8   97.33    3.86
   3  -9  -8   91.90    2.76
   3   9  -8  101.98    3.63
  -3  -9   8   98.05    4.23
  -3   9   8   91.10    3.26
   3   9  -7  118.14    4.04
  -3  -9   7  112.04    4.31
  -3  -9   7  104.85    4.38
  -3   9   7  109.79    3.58
   3  -9  -7  105.96    3.05
   3   9  -7  101.00    4.34
   3   9  -7  110.16    4.05
   3   9  -6  186.63    6.13
  -3  -9   6  181.22    6.01
   3   9  -6  195.56    5.67
  -3   9   6  179.16    5.09
   3  -9  -6  181.57    4.66
   3   9  -6  190.11    5.70
   3   9  -5  244.12    6.98
   3   9  -5  244.43    6.62
  -3  -9   5  241.83    6.88
  -3   9   5  228.41    5.97
   3   9  -4  129.97    4.68
   3   9  -4  122.10    4.47
  -3   9   4  122.51    3.88
  -3  -9   4  130.77    4.60
  -3   9   4  126.96    3.12
  -3   9   3  783.92   17.69
   3   9  -3  793.16   18.40
   3   9  -3  782.64   18.33
  -3   9   3  790.20   16.98
  -3  -9   3  777.53   18.36
   3   9  -3  805.96   18.29
   3   9  -2  116.98    4.41
   3   9  -2  116.91    4.20
  -3   9   2  126.20    3.81
  -3   9   2  112.56    3.25
   3   9  -2  116.40    4.28
  -3  -9   2  119.24    4.04
   3  -9  -2  119.71    3.11
  -3  -9   1   54.97    2.55
   3  -9  -1   55.60    2.02
   3   9  -1   51.36    2.70
   3   9  -1   57.65    3.06
   3  -9  -1   54.23    2.54
   3   9  -1   60.03    2.95
  -3   9   1   56.81    2.46
  -3   9   1   59.02    2.14
   3  -9   0   84.55    2.78
   3   9   0   81.64    3.35
  -3   9   0   88.07    2.89
   3  -9   0   86.82    3.30
   3   9   0   80.22    3.50
  -3   9   0   83.43    3.12
  -3   9  -1   15.96    1.62
   3   9   1   19.21    1.85
   3  -9   1   13.97    1.44
  -3   9  -1   17.06    1.56
   3   9   1   16.01    2.11
   3   9   1   19.81    1.99
   3  -9   1   16.35    1.87
   3  -9   2    0.17    1.55
  -3   9  -2    1.47    1.25
   3  -9   2    0.25    1.26
   3   9   2    0.99    1.79
  -3   9  -2    1.91    1.33
   3   9   2    2.24    1.63
   3   9   2    1.60    1.55
   3   9   3    0.48    1.35
   3  -9   3    0.97    1.30
   3   9   3    2.50    1.79
   3  -9   3    1.18    1.56
  -3   9  -3   -0.22    1.40
   3   9   3    0.74    1.71
  -3   9  -3    0.15    1.48
  -3   9  -3    0.95    1.33
  -3   9  -4  220.64    6.18
  -3   9  -4  221.58    6.27
   3   9   4  220.67    6.70
   3  -9   4  209.95    6.14
   3   9   4  229.61    6.61
  -3   9  -4  212.13    6.09
   3  -9   4  218.97    6.54
   3   9   4  220.02    6.25
   3  -9   5    0.30    1.73
   3  -9   5    1.10    1.50
  -3   9  -5    2.42    1.55
   3   9   5    1.34    1.84
  -3   9  -5    0.89    1.61
   3   9   5    2.11    1.66
  -3   9  -5   -0.42    1.49
   3   9   5    0.32    1.46
  -3   9  -6   35.97    2.48
  -3  -9  -6   35.96    1.36
   3  -9   6   40.71    2.57
   3   9   6   37.44    2.71
  -3   9  -6   37.44    2.62
   3   9   6   38.75    2.67
   3   9   6   39.79    2.37
  -3   9  -6   41.70    2.32
  -3   9  -7    3.39    1.66
   3  -9   7    2.70    1.63
  -3   9  -7    0.92    1.75
   3   9   7    0.20    1.79
  -3   9  -7    0.07    1.46
   3   9   7    2.24    1.53
   3   9   8  219.13    6.71
  -3   9  -8  226.41    6.87
  -3   9  -8  218.81    6.09
   3   9   8  222.73    6.35
   3   9   9  100.99    3.85
   3  -9   9  102.30    4.53
   3   9   9   96.56    4.11
  -3   9  -9  102.05    4.35
  -3   9  -9  100.43    3.61
  -3   9 -10   30.46    2.16
  -3   9 -10   29.39    2.76
   3   9  10   27.26    2.48
   3  -9  10   24.32    2.82
   3   9  10   26.16    2.01
   3   9  10   24.90    1.98
   3   9  10   28.31    2.26
   3  10 -10    7.12    1.58
   3  10 -10    6.81    1.31
  -3 -10  10    5.06    2.27
   3  10 -10    3.90    2.21
   3 -10 -10    6.16    1.04
  -3  10  10   10.33    2.28
   3  10  -9  125.22    4.28
   3  10  -9  119.88    5.13
   3 -10  -9  121.46    3.37
  -3  10   9  139.48    5.29
  -3 -10   9  133.12    5.21
   3  10  -8   -0.52    2.01
   3  10  -8    1.28    1.60
  -3  10   8    2.38    2.37
  -3 -10   8   -0.24    1.96
   3 -10  -8    1.13    0.96
  -3  10   8    0.93    1.28
   3  10  -7   76.75    3.48
   3  10  -7   84.83    4.08
  -3 -10   7   77.97    3.94
  -3  10   7   76.68    3.06
   3 -10  -7   79.54    2.52
   3 -10  -6  306.14    7.30
   3  10  -6  309.43    8.41
   3  10  -6  311.76    8.90
  -3 -10   6  307.78    8.84
  -3  10   6  314.69    7.90
   3  10  -5  152.60    5.25
   3  10  -5  131.56    4.84
  -3  10   5  133.49    3.26
  -3 -10   5  154.82    5.20
  -3  10   5  148.68    4.38
  -3 -10   4   17.55    2.08
   3  10  -4   19.36    2.27
   3  10  -4   19.91    2.26
  -3  10   4   20.57    1.09
  -3 -10   4   18.68    2.28
  -3  10   4   18.95    1.70
   3  10  -3  143.87    5.13
  -3  10   3  146.56    4.51
   3  10  -3  154.76    5.14
  -3  10   3  147.99    3.85
  -3 -10   3  141.89    5.10
   3  10  -3  146.20    4.97
  -3 -10   3  150.95    4.89
  -3 -10   2 1032.99   23.23
   3  10  -2 1051.03   23.84
   3  10  -2 1020.72   23.61
  -3  10   2 1034.10   22.45
   3  10  -2 1046.46   23.65
  -3  10   2 1052.45   23.05
  -3 -10   1  108.56    3.78
   3 -10  -1  109.86    3.19
   3  10  -1  103.12    4.36
   3  10  -1  109.47    4.09
   3 -10  -1  109.80    3.87
  -3  10   1  104.41    3.32
   3  10  -1  110.59    4.20
  -3  10   1  112.75    3.76
   3  10   0  125.90    4.47
  -3  10   0  128.03    3.93
   3 -10   0  133.39    4.45
   3  10   0  129.35    4.69
  -3  10   0  133.49    4.22
   3 -10   0  129.72    3.80
   3  10   1  178.54    5.68
   3  10   1  174.44    5.52
  -3  10  -1  184.10    5.13
   3 -10   1  180.34    5.59
   3 -10   1  177.19    4.99
  -3  10  -1  175.23    5.27
   3  10   2  157.76    5.18
   3 -10   2  163.05    4.86
  -3  10  -2  165.71    4.95
   3 -10   2  159.93    5.33
  -3  10  -2  170.01    5.04
   3  10   2  160.56    5.62
   3  10   2  169.04    5.44
   3  10   3   59.27    2.92
   3 -10   3   54.50    2.68
  -3  10  -3   58.98    2.83
  -3  10  -3   61.40    2.86
  -3  10  -3   63.22    2.95
   3  10   3   56.86    3.32
   3  10   3   52.86    3.08
   3 -10   3   56.92    3.08
  -3  10  -4  115.22    4.12
   3  10   4  116.75    4.65
   3  10   4  120.90    4.25
  -3  10  -4  116.17    4.17
   3  10   4  120.04    4.47
  -3  10  -4  119.52    4.17
   3 -10   4  115.02    4.45
   3 -10   4  114.32    4.08
   3  10   5   71.55    3.24
  -3  10  -5   73.46    3.29
   3  10   5   72.23    3.69
  -3  10  -5   76.40    3.43
   3  10   5   78.19    3.60
  -3  10  -5   71.77    3.19
   3 -10   5   76.29    3.67
   3 -10   5   70.53    3.24
   3  10   6  376.53    9.64
   3 -10   6  362.92    9.73
   3  10   6  373.44   10.14
  -3  10  -6  389.66    9.99
   3  10   6  380.42   10.06
  -3  10  -6  378.60    9.43
   3 -10   6  349.72   10.07
   3  10   7   75.54    3.28
   3  10   7   78.07    3.72
  -3  10  -7   76.40    3.63
  -3  10  -7   76.30    3.12
  -3 -10  -7   68.32    1.74
   3  10   8   56.11    2.88
  -3  10  -8   56.63    3.29
  -3  10  -8   46.99    2.58
   3  10   8   51.72    3.20
   3  10   9   44.52    2.68
   3  10   9   37.92    2.92
  -3  10  -9   43.20    3.12
   3  10  10   82.01    3.58
   3  10  10   83.28    3.92
  -3  11   9  102.60    4.90
   3  11  -9   90.12    3.80
   3 -11  -9   91.84    2.75
  -3 -11   9   90.02    4.40
   3  11  -9   98.16    4.60
   3 -11  -8    1.61    0.99
   3  11  -8    3.01    2.19
  -3 -11   8    4.60    2.01
   3  11  -8    1.62    1.74
  -3  11   8    2.82    2.58
   3  11  -7   10.77    2.26
  -3 -11   7   10.43    2.25
   3  11  -7   11.59    2.09
  -3  11   7   11.39    1.66
  -3  11   7   17.94    3.24
   3 -11  -7   10.34    1.22
   3  11  -6    2.49    1.89
   3  11  -6   -0.51    1.92
   3 -11  -6    0.92    1.11
  -3  11   6    2.12    1.45
  -3 -11   6    2.33    2.01
   3  11  -5  205.85    6.38
   3  11  -5  210.09    6.61
  -3  11   5  188.39    4.53
  -3  11   5  207.86    5.72
  -3 -11   5  207.32    6.63
   3  11  -4   -0.77    1.96
  -3  11   4    0.12    0.82
  -3 -11   4    0.28    1.69
   3  11  -4    0.81    1.91
  -3 -11   4   -1.24    2.00
  -3  11   4   -0.07    1.42
  -3  11   3   48.62    2.50
   3  11  -3   50.29    3.03
   3  11  -3   55.49    3.07
  -3  11   3   44.81    1.86
   3  11  -3   43.70    3.04
  -3 -11   3   39.02    2.57
   3  11  -2  125.38    4.74
  -3 -11   2  128.30    4.49
   3  11  -2  134.68    5.09
  -3  11   2  132.38    3.79
  -3  11   2  134.97    4.36
   3  11  -2  137.31    4.88
   3  11  -1    1.17    1.98
   3 -11  -1    0.04    0.98
  -3 -11   1    0.94    1.52
   3  11  -1    0.10    1.66
  -3  11   1    0.93    1.41
  -3  11   1    0.11    1.17
   3 -11  -1    0.59    1.44
   3  11  -1    1.14    1.77
   3 -11   0   22.86    1.58
  -3  11   0   23.08    1.97
   3  11   0   21.18    2.21
  -3  11   0   20.26    1.74
   3 -11   0   24.82    2.17
   3  11   0   20.74    2.19
  -3  11  -1    1.47    1.45
   3 -11   1    2.29    1.22
   3  11   1    2.52    1.73
   3  11   1    2.31    1.80
  -3  11  -1   -0.28    1.35
   3 -11   1    0.10    1.62
   3  11   2   -0.63    1.79
   3 -11   2    0.35    1.35
  -3  11  -2    1.17    1.51
  -3  11  -2    0.77    1.40
   3 -11   2   -0.21    1.67
   3  11   2    2.39    1.63
   3  11   2   -0.36    2.00
   3 -11   3   31.36    2.16
   3  11   3   30.71    2.35
  -3  11  -3   25.76    2.17
  -3  11  -3   30.35    2.25
   3  11   3   26.51    2.66
  -3  11  -3   28.50    2.38
   3 -11   3   26.69    2.47
   3  11   3   31.67    2.68
   3 -11   4    4.15    1.93
   3  11   4    4.98    1.75
  -3  11  -4    2.50    1.66
   3 -11   4    1.54    1.55
  -3  11  -4    4.23    1.72
   3  11   4    2.31    2.13
   3  11   4    4.43    1.92
  -3  11  -4    3.50    1.69
   3 -11   5    4.85    2.04
   3 -11   5    2.30    1.66
   3  11   5    3.45    1.68
   3  11   5    1.97    2.16
  -3  11  -5    3.19    1.70
   3  11   6   30.48    2.91
   3  11   6   29.05    2.37
  -3  11  -6   28.73    2.55
   3 -11   6   33.22    2.81
   3  11   7  169.86    5.49
   3  11   7  177.32    6.05
  -3  11  -7  179.43    5.89
   3 -11   7  168.15    6.15
  -3 -11  -7  170.11    3.95
   3  11   8   27.69    2.37
  -3  11  -8   29.16    2.72
   3  11   8   28.87    2.85
   3  12  -8   50.47    3.12
   3  12  -8   50.91    3.63
  -3  12   8   55.78    4.24
  -3 -12   8   47.39    3.50
   3 -12  -8   49.36    1.98
  -3  12   7   63.02    4.54
   3  12  -7   50.61    3.22
   3  12  -7   57.95    3.62
  -3 -12   7   48.75    3.45
   3 -12  -7   55.82    2.19
  -3  12   6    3.24    2.92
   3 -12  -6    1.61    1.21
  -3  12   6   -0.40    1.46
   3  12  -6   -0.27    2.02
  -3 -12   6    0.91    2.05
   3  12  -6    1.14    2.01
   3  12  -5   97.37    4.44
  -3 -12   5   94.43    4.39
  -3  12   5   97.23    3.71
   3  12  -5  101.94    4.38
  -3  12   4   25.38    2.07
   3  12  -4   24.50    2.61
   3  12  -4   26.76    2.68
   3  12  -3   16.90    2.44
   3  12  -3   16.77    2.32
  -3  12   3   18.91    1.36
  -3  12   3   17.57    1.86
  -3 -12   2   45.23    2.60
  -3  12   2   40.26    1.95
   3  12  -2   40.13    2.88
   3  12  -2   37.60    3.12
  -3  12   2   43.59    2.48
   3 -12  -1    7.13    1.21
  -3  12   1    6.40    1.35
  -3  12   1   10.25    1.73
   3  12  -1    9.47    2.28
   3  12  -1    7.17    1.92
   3 -12   0    7.68    1.32
   3  12   0   11.62    2.02
  -3  12   0    9.33    1.56
   3 -12   0    8.83    1.94
  -3  12   0    7.52    1.72
   3 -12   1    6.09    1.36
  -3  12  -1    6.36    1.74
   3  12   1    5.86    1.83
  -3  12  -1    6.99    1.56
   3 -12   1    6.90    1.93
   3 -12   2   64.14    2.85
   3  12   2   61.09    3.24
  -3  12  -2   67.84    3.01
   3 -12   2   62.06    3.44
   3  12   2   64.60    3.78
  -3  12  -2   64.99    3.17
   3  12   3    0.13    2.21
   3  12   3    2.44    1.75
  -3  12  -3    4.77    1.65
   3 -12   3    2.33    1.95
   3 -12   3    1.72    1.53
  -3  12  -4    8.87    1.90
   3  12   4    8.72    2.33
   3 -12   4    8.56    2.12
   3 -12   4    9.58    1.77
   3  12   4    5.91    1.86
   3  12   5   16.22    2.10
   3 -12   5   12.07    2.28
   3  12   5   17.65    2.62
  -3  12  -5   19.17    2.22
   3  12   6    2.87    1.78
   3  12   6    1.75    2.37
  -3  12  -6    0.67    1.90
   3 -12   6   -0.91    2.00
   3  12   7  191.70    6.57
  -3  12  -7  194.10    6.30
   3 -12   7  174.67    6.48
   3  12   7  183.75    5.85
  -3 -12  -7  179.24    4.29
   3 -13  -6   40.89    2.07
   3  13  -6   35.46    3.06
   3  13  -6   35.11    3.21
   3  13  -5  159.70    5.84
   3  13  -5  152.29    5.73
  -3 -13   5  150.95    5.83
  -3  13   4   16.96    2.03
   3  13  -4   11.12    2.51
   3  13  -4   18.91    2.47
   3  13  -3  135.10    5.40
   3  13  -3  131.34    5.21
  -3  13   3  130.59    4.53
   3  13  -2   13.91    2.31
  -3  13   2   20.42    2.06
   3  13  -2   21.11    2.76
   3  13  -1  218.36    7.12
   3  13  -1  201.88    6.68
  -3  13   1  198.00    5.61
  -3  13   1  212.63    6.22
   3  13   0  119.87    4.74
  -3  13   0  122.38    4.04
   3 -13   0  118.65    4.61
   3  13   0  122.78    5.21
   3 -13   0  120.93    3.78
   3  13   1    3.68    1.81
   3 -13   1    1.61    1.34
  -3  13  -1    1.19    1.50
   3 -13   1    1.89    1.87
   3  13   2   54.11    3.19
  -3  13  -2   60.21    2.94
   3 -13   2   57.01    3.42
   3  13   2   62.45    3.84
   3 -13   2   61.99    2.81
   3  13   3   26.87    2.50
  -3  13  -3   33.63    2.43
   3 -13   3   30.48    2.79
   3  13   3   30.99    3.12
   3 -13   3   28.18    2.19
   3  13   4   17.29    2.19
   3 -13   4   20.54    2.49
  -3  13  -4   15.55    2.18
   3  13   4   20.34    2.77
   3  13   5   58.18    3.26
  -3  13  -5   56.46    3.31
   3 -13   5   62.18    3.71
   3  13   5   63.76    4.02
   3  14  -2    1.75    2.47
   3  14  -2    2.71    2.04
   3  14  -1    0.88    2.04
   3  14  -1   -1.92    2.35
   3 -14   0   81.95    3.05
   3  14   0   83.92    4.12
   3  14   1   59.33    3.43
  -3  14  -1   55.71    2.81
   3 -14   1   51.50    3.31
   3 -14   1   53.92    2.59
   3 -14   2  151.60    4.87
   3  14   2  152.17    5.50
  -3  14  -2  153.97    5.09
   3 -14   2  148.50    5.64
   4   0 -14    9.77    1.70
  -4   0  14   10.52    1.91
  -4   0  14   10.09    1.59
  -4   0  14    7.92    1.30
  -4   0  13   -0.79    1.57
  -4   0  13    0.40    1.23
   4   0 -13    0.24    1.44
  -4   0  13    0.17    1.10
  -4   0  12    1.30    1.47
   4   0 -12    0.46    1.41
  -4   0  12    1.17    1.20
  -4   0  12    0.82    1.14
   4   0 -11    1.00    1.40
  -4   0  11    0.44    1.06
  -4   0  11    0.34    1.08
  -4   0  11   -0.52    1.38
  -4   0  10  111.91    3.78
   4   0 -10  118.43    3.82
  -4   0  10  109.93    3.41
  -4   0  10  118.06    3.37
  -4   0   9    0.39    1.02
  -4   0   9    0.79    1.24
   4   0  -9    0.67    1.20
   4   0  -9   -0.39    0.80
  -4   0   9    1.07    0.92
  -4   0   8   14.84    1.37
   4   0  -8   16.80    1.00
   4   0  -8   12.78    1.34
  -4   0   8   13.89    1.19
  -4   0   8   15.32    1.10
   4   0  -7    0.15    0.97
   4   0  -7   -0.19    0.60
  -4   0   7    0.58    0.82
  -4   0   7   -0.03    0.67
  -4   0   7    0.33    0.93
  -4   0   6  943.40   20.22
   4   0  -6  958.28   19.74
   4   0  -6  951.72   20.29
  -4   0   6  902.80   19.56
  -4   0   6  941.68   19.85
  -4   0   6  936.64   20.01
  -4   0   5    0.39    0.79
   4   0  -5   -0.11    0.50
   4   0  -5   -0.27    0.82
  -4   0   5   -0.25    0.54
  -4   0   5    0.03    0.80
  -4   0   5    0.65    0.59
  -4   0   4  235.28    5.62
   4   0  -4  232.75    5.66
  -4   0   4  239.08    5.41
  -4   0   4  232.92    5.55
   4   0  -4  234.82    5.37
   4   0  -4  244.67    5.25
   4   0  -3    1.58    0.87
  -4   0   3    0.77    0.82
   4   0  -3    1.61    0.98
  -4   0   3    1.50    0.77
  -4   0   3    0.61    0.80
   4   0  -3    0.46    0.75
   4   0  -3    1.17    0.53
   4   0  -2 2282.14   48.85
  -4   0   2 2350.89   48.83
  -4   0   2 2365.37   48.76
   4   0  -2 2319.58   48.81
  -4   0   1    0.62    0.85
  -4   0   1   -0.93    0.63
   4   0  -1   -0.16    0.67
   4   0   0 3167.09   66.00
  -4   0   0 3213.85   66.28
   4   0   0 3125.33   66.23
  -4   0  -1    0.07    1.00
   4   0   1    1.54    0.95
   4   0   1    0.71    0.61
  -4   0  -2    5.21    1.18
   4   0   2    7.55    1.17
   4   0   2    6.83    0.75
   4   0   3    1.10    1.09
   4   0   3   -0.04    0.68
  -4   0  -3    1.15    1.20
   4   0   4 7281.17  145.08
   4   0   4 7218.84  145.16
   4   0   4 6722.52  145.08
   4   0   4 6832.55  144.50
   4   0   5    0.25    0.58
  -4   0  -5    1.00    1.09
   4   0   5    0.18    1.01
   4   0   5   -0.05    1.05
   4   0   5    1.46    1.05
   4   0   6    1.88    1.10
  -4   0  -6    2.77    1.15
   4   0   6    3.04    1.14
   4   0   6    2.69    1.14
   4   0   7   -0.50    1.11
  -4   0  -7    0.47    1.25
   4   0   7    0.33    1.21
   4   0   7    0.22    1.27
   4   0   8   16.24    1.52
   4   0   8   17.84    1.72
  -4   0  -8   16.22    1.67
   4   0   8   16.72    1.87
   4   0   9   -0.05    1.31
   4   0   9    1.52    1.52
   4   0   9   -0.35    1.50
  -4   0  -9    0.94    1.38
  -4   0 -10  600.60   13.64
   4   0  10  573.86   13.92
   4   0  10  576.40   14.12
   4   0  10  569.45   13.28
   4   0  11    1.61    1.31
   4   0  11   -0.85    1.62
  -4   0 -11    1.13    1.59
   4   0  12  568.41   14.14
   4   0  12  552.17   13.22
  -4   0 -13   -1.08    1.76
   4   0  13    0.22    1.69
   4   0  13   -0.77    1.38
  -4  -1  14   22.85    1.66
  -4  -1  14   22.20    2.00
   4   1 -14   22.77    2.19
  -4   1  14   22.25    1.49
  -4   1  13   -0.18    1.14
  -4  -1  13    1.41    1.68
  -4   1  13    2.53    1.50
  -4   1  13   -0.33    1.09
   4   1 -13   -0.09    1.64
   4  -1 -13   -0.49    1.32
   4   1 -13    0.88    1.06
  -4  -1  13    1.20    1.32
  -4  -1  13    1.22    1.22
  -4   1  12  244.93    6.61
  -4  -1  12  223.04    6.03
  -4  -1  12  229.11    6.76
  -4   1  12  255.76    5.94
  -4  -1  12  227.63    6.40
   4   1 -12  241.28    6.80
   4   1 -12  239.07    6.05
   4  -1 -12  251.60    6.44
  -4   1  12  233.66    6.14
  -4  -1  11   22.61    1.99
  -4   1  11   20.28    1.76
   4   1 -11   20.55    1.46
   4   1 -11   22.66    2.00
   4  -1 -11   21.60    1.69
  -4  -1  11   24.67    1.64
  -4  -1  11   20.03    1.66
  -4   1  11   23.36    1.45
  -4   1  11   20.09    1.46
  -4  -1  10    2.88    1.18
  -4   1  10    2.89    0.95
  -4  -1  10    2.51    1.47
  -4   1  10    2.58    1.29
   4   1 -10    2.75    1.43
   4   1 -10    2.52    1.06
   4  -1 -10    3.62    1.26
  -4   1  10    2.42    1.04
  -4  -1  10    3.73    1.21
  -4  -1   9   12.91    1.58
  -4   1   9   16.04    1.42
  -4   1   9   13.64    1.20
   4   1  -9   13.48    1.59
   4   1  -9   14.88    1.22
   4  -1  -9   15.08    1.43
  -4  -1   9   15.86    1.40
  -4   1   9   16.86    1.12
  -4  -1   9   15.02    1.36
  -4   1   8  361.46    8.11
  -4  -1   8  353.03    8.73
  -4   1   8  365.30    8.51
   4   1  -8  362.65    8.22
   4   1  -8  349.25    8.79
   4  -1  -8  353.24    8.44
  -4  -1   8  356.33    8.41
  -4   1   8  356.40    8.20
  -4  -1   8  366.79    8.41
  -4  -1   7  157.14    4.15
  -4  -1   7  155.86    4.42
  -4   1   7  159.91    3.55
   4   1  -7  164.67    4.00
   4   1  -7  155.70    4.49
  -4   1   7  159.96    4.18
  -4   1   7  154.22    3.80
  -4  -1   7  156.00    4.11
  -4   1   7  155.05    3.98
   4  -1  -7  156.76    4.16
  -4   1   6  684.44   14.41
  -4   1   6  675.20   14.82
   4   1  -6  684.84   14.68
  -4  -1   6  675.37   14.33
   4   1  -6  662.74   15.18
   4  -1  -6  678.36   14.85
  -4  -1   6  673.90   15.11
  -4  -1   6  683.36   14.80
  -4   1   6  681.04   14.43
  -4   1   6  680.35   14.72
  -4  -1   6  684.35   14.89
   4  -1  -6  675.65   14.97
   4   1  -5  433.06    9.70
  -4   1   5  444.85    9.78
  -4  -1   5  442.03   10.09
  -4   1   5  441.21    9.57
   4  -1  -5  448.27    9.84
  -4  -1   5  434.15    9.91
  -4   1   5  440.48    9.35
  -4  -1   5  437.36    9.79
   4   1  -5  430.47   10.13
   4   1  -5  439.86    9.46
  -4   1   5  439.50    9.77
  -4  -1   5  463.09    9.59
  -4  -1   4   35.73    1.61
   4   1  -4   33.65    1.61
  -4   1   4   32.32    1.30
   4  -1  -4   35.10    1.35
  -4   1   4   35.51    1.30
  -4  -1   4   31.67    1.32
   4   1  -4   34.17    1.28
  -4  -1   4   33.36    1.31
  -4  -1   4   33.41    1.50
   4   1  -4   35.97    1.24
  -4   1   4   35.68    1.44
  -4  -1   3  327.24    7.54
   4  -1  -3  333.23    7.31
   4   1  -3  321.43    7.61
  -4  -1   3  316.25    7.37
  -4   1   3  325.05    7.35
  -4   1   3  338.30    7.39
   4  -1  -3  330.14    7.41
   4  -1  -3  333.70    7.42
   4   1  -3  324.88    7.32
   4   1  -3  328.76    7.32
  -4  -1   3  329.49    7.45
   4  -1  -2  131.79    3.22
  -4   1   2  121.85    3.31
  -4  -1   2  137.14    3.32
   4   1  -2  131.44    3.29
   4  -1  -2  123.94    3.27
  -4  -1   2  131.05    3.40
  -4   1   2  136.53    3.33
   4  -1  -2  130.86    2.93
   4   1  -2  133.31    3.47
  -4   1   1 2150.26   44.94
  -4   1   1 2115.09   45.03
  -4  -1   1 2141.67   44.89
   4  -1  -1 2134.89   44.75
  -4  -1   1 2206.27   45.13
   4  -1  -1 2144.21   44.90
   4   1  -1 2144.87   45.00
   4   1   0  873.36   18.47
   4  -1   0  873.57   18.67
   4  -1   0  863.27   18.44
   4  -1   0  849.04   18.42
  -4  -1   0  890.73   18.76
  -4   1  -1 1562.27   33.71
   4  -1   1 1635.81   33.46
   4   1   1 1560.43   33.74
  -4  -1  -1 1604.38   33.83
   4  -1   1 1595.07   33.71
   4   1   1 1582.95   33.39
  -4   1  -2  109.83    3.22
   4   1   2  114.02    3.28
  -4  -1  -2  104.54    3.29
   4  -1   2  110.40    2.83
   4   1   2  109.35    2.72
   4  -1   2  115.88    3.20
   4   1   3  703.25   14.79
   4  -1   3  721.72   15.34
  -4   1  -3  654.10   15.31
   4   1   3  684.11   15.23
  -4   1  -3  682.33   15.18
  -4  -1  -3  684.87   15.44
   4   1   3  746.67   15.47
   4  -1   4  165.26    4.35
   4   1   4  159.66    3.72
  -4   1  -4  155.10    4.23
   4   1   5 1634.77   32.65
   4  -1   5 1524.76   32.68
   4   1   5 1517.02   31.76
  -4   1  -5 1414.83   32.49
   4  -1   5 1471.53   32.70
   4   1   5 1532.87   32.63
  -4   1  -5 1555.34   32.42
   4  -1   5 1514.07   32.42
   4   1   6  157.13    4.21
   4  -1   6  140.78    4.34
   4   1   6  158.10    4.34
   4  -1   6  145.45    4.05
  -4   1  -6  140.82    4.21
   4   1   6  144.68    4.29
  -4  -1  -6  135.63    4.23
   4  -1   6  135.78    4.37
   4   1   6  147.63    3.35
  -4   1  -7  193.16    5.33
   4   1   7  194.89    4.37
  -4  -1  -7  190.98    5.43
   4  -1   7  200.42    5.58
   4   1   7  194.83    5.53
   4  -1   7  201.81    5.66
   4   1   7  200.56    5.56
   4  -1   7  197.22    5.19
   4  -1   8   23.12    1.68
   4   1   8   24.31    1.76
  -4  -1  -8   27.08    1.95
   4  -1   8   27.22    2.03
   4   1   8   25.76    1.90
   4   1   8   26.11    0.91
   4  -1   8   24.06    2.11
   4   1   8   27.70    2.11
  -4   1  -8   26.45    1.89
  -4  -1  -9    3.68    1.52
   4  -1   9    3.84    1.36
   4   1   9    3.81    1.37
   4  -1   9    2.77    1.44
  -4   1  -9    2.04    1.40
   4   1   9    2.31    1.42
   4  -1   9    2.27    1.69
   4   1   9    3.23    0.53
   4   1   9    3.98    1.60
   4  -1  10   14.26    1.54
  -4  -1 -10   16.08    1.90
   4   1  10   16.10    1.87
   4  -1  10   11.88    2.05
   4   1  10   16.94    2.13
  -4   1 -10   16.77    1.73
   4   1  10   13.10    0.63
   4  -1  10   17.22    2.03
   4   1  10   15.70    1.65
  -4   1 -11  127.40    4.12
   4  -1  11  130.37    4.63
   4   1  11  119.02    4.36
   4   1  11  121.28    3.86
   4   1  11  125.13    4.68
  -4  -1 -11  125.52    4.28
   4  -1  11  119.11    3.85
   4   1  12  108.36    4.27
   4  -1  12  108.31    4.35
  -4   1 -12  114.65    3.95
   4  -1  12  109.14    3.65
  -4  -1 -12  121.06    4.18
   4   1  12  102.60    3.57
   4   1  13   -0.29    1.35
   4  -1  13   -0.13    1.35
   4  -1  13   -0.22    1.80
   4   1  13    1.28    1.82
  -4   1 -13    5.16    1.74
  -4  -1 -13    0.98    1.78
   4   2 -14    0.82    1.76
   4   2 -14    0.29    1.19
  -4  -2  14    0.06    1.34
  -4   2  14    3.98    1.07
  -4  -2  14    0.96    1.59
  -4  -2  13  220.01    6.43
  -4  -2  13  224.59    6.78
  -4   2  13  226.15    6.33
  -4  -2  13  225.55    5.98
   4   2 -13  221.83    6.76
   4   2 -13  223.19    6.02
  -4   2  13  249.87    5.76
  -4   2  13  217.83    5.90
  -4   2  12   11.74    1.25
  -4   2  12   12.42    1.28
  -4  -2  12   11.73    1.92
  -4   2  12   12.22    1.58
  -4  -2  12   10.54    1.65
   4   2 -12    9.71    1.86
   4   2 -12   10.52    1.47
  -4  -2  12   11.27    1.54
  -4  -2  11   15.22    1.94
  -4   2  11   16.89    1.60
   4   2 -11   15.56    1.92
   4   2 -11   16.17    1.52
   4  -2 -11   15.97    1.43
  -4   2  11   18.20    1.34
  -4  -2  11   12.90    1.65
  -4   2  11   16.83    1.28
  -4  -2  11   15.94    1.59
  -4   2  10  413.30    9.06
  -4   2  10  394.56    9.02
  -4  -2  10  390.65    9.93
  -4   2  10  398.15    9.41
   4   2 -10  393.79    9.29
   4   2 -10  380.24    9.91
  -4  -2  10  390.04    9.57
   4  -2 -10  393.64    9.23
  -4  -2  10  382.57    9.34
  -4  -2   9    9.99    1.39
  -4   2   9    8.23    1.09
  -4   2   9    9.73    0.92
  -4   2   9    7.73    0.66
  -4  -2   9    8.58    1.31
  -4  -2   9    9.20    1.58
  -4   2   9    9.20    1.17
  -4   2   9    9.19    0.60
   4   2  -9   10.18    1.23
   4   2  -9    8.86    1.65
   4  -2  -9   10.47    1.13
   4  -2  -8   71.63    2.30
  -4  -2   8   70.05    2.83
  -4   2   8   70.09    2.36
   4   2  -8   70.53    2.41
   4   2  -8   73.73    2.95
  -4   2   8   67.22    2.02
  -4   2   8   71.25    2.05
  -4  -2   8   67.01    2.54
  -4   2   8   72.47    2.26
  -4   2   8   74.13    1.87
  -4  -2   8   69.54    2.56
  -4   2   7   14.53    0.77
   4   2  -7   15.66    1.17
  -4   2   7   15.17    1.05
  -4  -2   7   13.87    1.24
  -4  -2   7   16.11    1.46
   4   2  -7   16.83    1.56
   4  -2  -7   15.73    1.03
  -4   2   7   16.13    1.08
  -4   2   7   16.93    0.86
  -4  -2   7   15.50    1.36
   4  -2  -7   15.91    1.31
  -4   2   6 1579.53   33.29
  -4  -2   6 1604.90   33.86
   4   2  -6 1592.20   32.87
  -4  -2   6 1612.77   33.63
   4   2  -6 1616.05   33.98
  -4   2   6 1594.53   33.23
   4  -2  -6 1577.10   33.21
  -4  -2   6 1595.41   33.57
  -4   2   6 1535.89   32.86
   4   2  -6 1606.36   33.44
   4  -2  -6 1576.11   33.44
  -4   2   6 1549.74   33.10
   4   2  -5  161.03    3.99
  -4  -2   5  149.63    4.26
  -4   2   5  153.12    3.66
   4   2  -5  152.68    3.62
   4   2  -5  150.32    4.33
  -4   2   5  158.48    3.89
   4  -2  -5  158.20    3.71
  -4  -2   5  156.64    3.79
   4  -2  -5  150.84    3.92
  -4  -2   5  154.17    4.05
  -4   2   5  158.77    3.77
  -4  -2   5  156.77    4.14
  -4   2   4  751.90   16.24
  -4   2   4  756.96   16.31
  -4  -2   4  772.54   16.69
   4  -2  -4  765.53   16.08
   4   2  -4  749.76   16.17
  -4  -2   4  762.18   16.46
  -4  -2   4  767.34   16.33
   4   2  -4  742.88   16.39
  -4  -2   4  750.92   16.51
  -4  -2   3 1476.16   31.13
   4  -2  -3 1428.39   30.57
  -4  -2   3 1465.55   30.99
  -4  -2   3 1487.94   30.98
   4   2  -3 1499.00   30.84
  -4   2   3 1461.05   30.84
   4   2  -3 1446.09   30.96
  -4   2   3 1460.37   30.85
   4  -2  -2 4777.25   99.85
  -4  -2   2 4832.42  100.27
  -4  -2   2 4736.53  100.33
   4  -2  -2 4766.20  100.05
  -4   2   2 4775.06  100.14
   4   2  -2 4805.96  100.25
   4  -2  -2 4869.63   99.72
  -4  -2   2 4775.22  100.16
   4   2  -2 4843.04  100.19
   4  -2  -1  153.23    3.59
  -4  -2   1  154.03    4.08
   4  -2  -1  158.33    3.77
  -4   2   1  150.69    3.50
  -4   2   1  157.69    3.92
   4  -2   0    3.38    1.08
   4   2   0    1.80    0.96
   4  -2   0    2.76    0.71
   4  -2   0    2.01    0.79
  -4   2   0    0.70    0.95
  -4   2   0    1.44    0.67
   4   2   0    1.37    0.94
  -4  -2   0    1.55    1.13
  -4  -2  -1  415.94    9.60
   4  -2   1  406.96    9.24
  -4  -2  -1  411.90    8.99
  -4   2  -1  417.69    9.20
   4  -2   1  423.21    9.30
   4   2   1  428.81    9.53
   4  -2   1  411.25    9.44
  -4   2  -1  408.36    9.36
   4   2   1  407.35    9.13
  -4   2  -2  210.99    5.34
   4   2   2  217.65    4.98
  -4   2  -2  209.29    5.20
   4   2   2  220.93    5.50
   4  -2   2  212.13    5.37
  -4  -2  -2  209.10    5.56
  -4  -2  -2  220.92    4.86
  -4  -2  -3  666.43   15.03
  -4   2  -3  669.89   14.74
   4   2   3  676.17   14.90
   4   2   3  665.25   14.28
   4  -2   3  670.68   14.79
   4   2   4  207.41    5.23
  -4   2  -4  190.54    5.01
   4   2   4  196.30    4.44
   4  -2   4  191.54    5.02
   4  -2   5  332.31    8.30
  -4   2  -5  327.52    8.10
   4   2   5  358.97    8.25
  -4   2  -5  335.83    8.09
   4   2   5  339.50    7.35
   4   2   5  375.60    8.18
   4  -2   5  316.54    8.00
   4  -2   6   56.18    2.52
  -4  -2  -6   58.85    2.57
   4   2   6   63.49    2.46
  -4   2  -6   57.06    2.38
   4  -2   6   55.43    2.58
   4   2   6   65.05    2.43
  -4   2  -6   52.65    2.36
   4   2   6   59.14    2.43
   4  -2   6   51.47    2.23
   4   2   6   58.94    1.51
   4  -2   7   71.81    2.96
   4   2   7   72.30    2.80
  -4  -2  -7   70.76    2.92
   4  -2   7   74.85    3.06
   4   2   7   82.51    2.92
  -4   2  -7   70.55    2.73
  -4   2  -7   70.93    2.74
   4   2   7   79.78    2.91
   4   2   7   68.11    1.70
   4  -2   7   64.78    2.58
  -4   2  -8    2.94    1.39
   4  -2   8    3.04    1.52
  -4  -2  -8    2.76    1.61
   4  -2   8    2.74    1.54
   4   2   8    5.54    1.42
   4   2   8    2.74    1.39
   4   2   8    3.30    1.43
  -4   2  -8    4.98    1.36
   4  -2   8    4.10    1.25
  -4   2  -9    7.73    1.57
  -4   2  -9    9.50    1.48
   4  -2   9    8.39    1.73
   4  -2   9    9.58    1.73
   4   2   9   10.11    1.56
   4   2   9   10.55    1.68
   4   2   9   10.05    1.83
  -4  -2  -9    8.13    1.72
   4  -2   9    8.56    1.43
  -4  -2 -10   23.01    2.13
   4   2  10   29.16    1.99
   4  -2  10   30.50    2.35
   4   2  10   29.86    2.19
   4  -2  10   24.72    2.35
   4   2  10   24.98    2.29
   4  -2  10   25.37    1.83
  -4   2 -10   29.77    2.03
   4   2  11   37.85    2.22
   4  -2  11   42.16    2.72
   4   2  11   32.34    2.45
   4   2  11   38.44    2.63
  -4   2 -11   42.22    2.30
   4  -2  11   37.21    2.16
  -4  -2 -11   40.48    2.56
  -4  -2 -12  112.70    4.26
   4  -2  12  115.22    4.54
   4   2  12  116.52    4.28
  -4   2 -12  115.62    3.93
   4  -2  12  108.10    3.75
   4   2  12  107.33    3.70
   4  -2  13   96.96    4.20
   4   2  13   87.51    3.26
  -4   2 -13   95.69    3.58
   4   2  13   84.68    3.86
  -4  -2 -13  105.95    4.04
   4  -2  13   88.74    3.37
  -4  -3  14    1.15    1.48
   4   3 -14    1.55    1.92
   4   3 -14    0.54    1.41
  -4  -3  14    1.03    1.66
   4   3 -13   22.26    2.36
   4   3 -13   19.44    1.79
  -4  -3  13   22.83    2.07
  -4  -3  13   19.75    1.86
  -4   3  13   18.96    1.49
  -4  -3  12    0.99    1.68
   4   3 -12    0.40    1.72
  -4   3  12   -0.23    1.00
   4   3 -12    1.06    1.27
  -4   3  12   -1.92    1.21
  -4  -3  12    2.48    1.54
  -4  -3  12   -0.37    1.39
  -4  -3  11   18.42    2.07
  -4  -3  11   15.79    1.79
  -4   3  11   18.07    1.35
  -4   3  11   16.57    1.45
   4   3 -11   16.83    1.59
   4   3 -11   14.96    2.03
  -4   3  11   13.72    0.61
  -4   3  11   16.70    1.25
  -4  -3  11   15.11    1.67
  -4  -3  10   31.87    2.04
  -4  -3  10   33.96    2.36
  -4   3  10   32.97    1.73
   4   3 -10   32.10    1.86
   4   3 -10   31.15    2.35
  -4   3  10   36.56    1.52
  -4   3  10   33.24    1.18
  -4  -3  10   35.60    2.17
  -4   3  10   35.84    1.65
  -4   3  10   31.59    1.26
  -4   3   9   27.65    1.25
   4   3  -9   26.23    2.06
  -4  -3   9   29.70    2.12
  -4   3   9   27.38    1.46
  -4   3   9   28.20    1.18
  -4  -3   9   29.34    1.92
  -4  -3   9   25.89    1.83
  -4   3   9   28.40    1.49
   4   3  -9   29.61    1.75
  -4   3   9   28.12    1.36
  -4   3   8   15.67    1.06
  -4  -3   8   15.24    1.74
   4   3  -8   13.89    1.34
  -4   3   8   15.12    0.86
   4   3  -8   18.15    1.74
   4  -3  -8   16.65    1.35
  -4   3   8   14.32    1.00
  -4   3   8   16.32    1.20
  -4  -3   8   15.50    1.50
  -4  -3   8   16.59    1.56
   4   3  -7   41.38    1.23
  -4   3   7   47.53    1.57
   4   3  -7   42.70    2.31
   4  -3  -7   48.89    1.87
   4   3  -7   53.05    2.01
   4  -3  -7   48.54    1.48
  -4   3   7   47.23    1.66
  -4  -3   7   44.41    2.08
  -4   3   7   51.61    1.77
  -4  -3   7   49.55    2.17
  -4  -3   7   48.47    2.29
  -4   3   7   49.88    1.36
  -4  -3   6   30.45    1.75
   4  -3  -6   30.66    1.41
   4   3  -6   29.12    1.80
  -4   3   6   30.21    1.03
  -4   3   6   27.30    0.80
   4   3  -6   31.41    1.08
   4  -3  -6   30.54    0.99
  -4   3   6   25.36    0.80
  -4   3   6   30.63    1.31
  -4  -3   6   31.77    1.65
  -4  -3   6   30.53    1.70
   4   3  -6   30.79    1.50
  -4  -3   5   83.73    2.92
   4  -3  -5   84.16    2.04
   4   3  -5   89.09    2.37
  -4  -3   5   89.98    2.81
  -4   3   5   86.64    2.54
   4  -3  -5   89.76    2.51
   4   3  -5   87.16    2.71
  -4  -3   5   89.06    2.88
  -4   3   5   90.78    2.05
  -4  -3   4    7.96    1.20
   4   3  -4    9.57    0.93
  -4   3   4    8.76    0.96
  -4  -3   4    9.73    1.08
   4   3  -4    9.13    1.07
  -4  -3   4    9.65    1.20
  -4  -3   4    7.14    1.05
  -4  -3   3  167.45    4.43
  -4  -3   3  165.86    4.30
  -4   3   3  163.57    4.15
   4   3  -3  158.85    4.27
   4   3  -3  168.03    4.14
  -4  -3   3  151.37    4.25
  -4  -3   2  149.49    4.22
   4  -3  -2  157.40    3.90
   4  -3  -2  162.22    3.53
   4   3  -2  158.59    4.20
  -4   3   2  154.72    4.05
   4  -3  -2  156.80    3.59
   4   3  -2  158.46    4.09
  -4   3   2  153.96    3.53
  -4  -3   2  156.07    4.11
  -4  -3   2  154.02    4.24
   4   3  -1  284.78    7.06
  -4   3   1  276.38    6.38
   4  -3  -1  298.14    6.41
   4  -3  -1  286.76    6.58
   4  -3  -1  296.41    6.48
  -4  -3   1  287.44    7.00
  -4   3   1  287.05    6.77
   4   3   0   45.72    1.98
  -4   3   0   43.50    1.53
  -4   3   0   46.78    1.85
   4  -3   0   43.75    1.58
  -4  -3   0   41.14    2.04
   4  -3   0   40.33    1.94
   4  -3   0   45.60    1.58
   4  -3   1  438.37   10.28
  -4  -3  -1  463.71   10.04
  -4   3  -1  457.81   10.40
  -4   3  -1  468.68   10.25
   4  -3   1  477.79   10.34
  -4  -3  -1  464.58   10.73
   4  -3   1  455.79   10.53
   4   3   1  463.20   10.60
  -4  -3  -2   62.95    1.74
  -4   3  -2   64.54    2.26
   4  -3   2   67.39    2.28
  -4  -3  -2   60.68    2.54
  -4   3  -2   63.87    2.16
   4  -3   2   56.17    2.28
   4   3   2   60.38    2.41
  -4  -3  -3 1004.37   20.77
  -4   3  -3  979.02   21.36
   4  -3   3  966.34   21.54
  -4  -3  -3  971.81   21.76
   4   3   3  997.71   21.65
   4  -3   3  968.67   21.50
  -4   3  -4    8.92    1.21
   4   3   4    9.71    1.33
   4  -3   4   11.06    1.26
  -4   3  -5  473.94   11.11
  -4   3  -5  478.69   11.22
   4   3   5  516.57   11.41
   4  -3   5  483.02   11.24
  -4   3  -6  170.39    4.80
  -4   3  -6  172.80    4.91
   4   3   6  183.92    5.02
   4   3   6  192.35    4.92
  -4  -3  -6  178.21    5.21
   4  -3   6  165.82    4.83
   4  -3   6  173.58    5.06
  -4  -3  -7   36.27    2.35
   4  -3   7   40.25    2.33
  -4   3  -7   41.21    2.10
   4   3   7   43.50    2.22
  -4   3  -7   38.71    2.10
   4   3   7   43.92    2.17
   4   3   7   41.60    2.24
   4  -3   7   34.56    2.01
   4  -3   8    3.26    1.52
  -4  -3  -8    5.28    1.70
   4  -3   8    4.14    1.73
  -4   3  -8    5.73    1.44
   4   3   8    4.87    1.59
   4   3   8    5.02    1.49
  -4   3  -8    3.77    1.38
   4  -3   8    3.70    1.37
   4  -3   9  105.38    4.01
  -4  -3  -9  100.27    3.91
   4   3   9  105.02    3.68
   4  -3   9  107.60    4.15
   4   3   9  108.69    3.82
  -4   3  -9  100.89    3.63
   4   3   9  103.82    3.89
  -4   3  -9  103.40    3.55
   4  -3   9  100.57    3.54
   4  -3  10    8.90    1.77
   4  -3  10    7.33    1.93
   4   3  10   10.88    1.76
   4   3  10   10.97    1.67
   4   3  10   12.38    1.92
  -4  -3 -10   10.69    1.91
   4  -3  10    8.30    1.52
  -4   3 -10    9.19    1.65
  -4  -3 -11    7.91    1.87
   4  -3  11    8.07    1.95
  -4   3 -11    6.17    1.58
   4   3  11    9.01    1.78
   4  -3  11    6.60    1.55
   4   3  11    6.68    1.56
   4  -3  12    0.23    1.76
   4   3  12    1.11    1.49
  -4  -3 -12    0.48    1.85
   4   3  12   -0.29    1.71
  -4   3 -12    0.56    1.45
   4   3  13  195.73    6.32
   4  -3  13  186.35    6.52
   4   3  13  200.83    5.62
  -4  -3 -13  213.13    6.41
  -4   3 -13  204.42    5.79
  -4  -4  14    1.92    1.65
   4   4 -14    1.77    2.10
  -4  -4  14    0.70    1.73
  -4  -4  13    8.42    1.82
   4   4 -13    8.91    1.69
   4   4 -13    6.49    2.00
  -4  -4  13    7.06    1.72
  -4   4  12   12.86    1.21
  -4   4  12   12.29    1.33
  -4  -4  12    9.00    1.73
   4   4 -12    8.78    1.59
   4   4 -12   13.38    2.14
  -4  -4  12   12.12    1.80
  -4   4  11  247.85    5.90
  -4  -4  11  245.90    7.15
  -4   4  11  254.77    6.15
   4   4 -11  246.65    6.51
   4   4 -11  246.47    7.20
  -4   4  11  224.54    5.65
  -4   4  11  248.90    5.61
  -4  -4  11  249.62    6.91
  -4  -4  11  242.02    6.56
   4   4 -10  100.79    3.49
  -4   4  10  102.86    2.88
  -4   4  10  106.06    3.08
  -4  -4  10  102.08    3.97
   4   4 -10  102.89    4.09
  -4   4  10  100.78    2.98
  -4   4  10  106.48    2.88
  -4  -4  10  106.87    3.82
  -4  -4  10  104.32    3.63
  -4  -4   9  707.76   16.58
  -4   4   9  726.77   15.45
   4   4  -9  681.88   16.64
   4   4  -9  723.34   16.03
  -4   4   9  689.36   15.64
  -4   4   9  732.67   15.46
  -4  -4   9  720.68   16.36
  -4   4   9  713.13   15.28
   4  -4  -9  682.63   15.65
  -4  -4   9  690.41   16.08
  -4  -4   8    0.31    1.35
  -4  -4   8   -0.78    1.48
  -4   4   8    0.03    0.64
   4   4  -8    1.46    1.17
  -4   4   8    1.00    0.62
   4   4  -8    0.86    1.40
   4   4  -8    0.14    0.48
  -4   4   8   -0.07    0.93
  -4  -4   8    0.14    1.25
   4  -4  -8    0.04    1.07
  -4  -4   7  127.07    4.24
   4   4  -7  121.27    4.27
  -4   4   7  131.95    3.08
   4   4  -7  131.77    3.18
  -4   4   7  132.48    3.60
   4   4  -7  130.49    3.86
  -4  -4   7  126.97    4.02
   4  -4  -7  128.68    3.50
  -4  -4   7  122.91    3.95
  -4   4   7  132.12    3.07
  -4   4   7  130.68    3.12
  -4  -4   6   44.08    2.14
  -4   4   6   39.01    1.11
   4  -4  -6   41.32    1.60
  -4   4   6   44.68    1.77
   4   4  -6   41.90    1.48
  -4  -4   6   39.43    2.00
  -4   4   6   36.91    1.16
   4   4  -6   42.93    1.92
   4   4  -5   53.63    2.13
  -4  -4   5   57.78    2.37
  -4   4   5   54.21    1.36
  -4   4   5   51.65    1.32
   4  -4  -5   58.25    1.84
  -4   4   5   59.52    2.08
  -4  -4   5   56.86    2.27
   4   4  -5   54.64    1.84
  -4  -4   4   31.31    1.80
   4  -4  -4   33.48    1.38
   4   4  -4   37.27    1.54
   4   4  -4   32.37    1.71
  -4   4   4   32.41    1.61
  -4  -4   4   31.70    1.71
  -4   4   4   33.38    0.95
  -4  -4   3 1343.19   28.92
   4   4  -3 1307.42   29.04
  -4  -4   3 1361.86   28.86
  -4   4   3 1319.26   28.05
  -4   4   3 1369.87   28.70
   4   4  -3 1328.72   28.84
   4   4  -3 1395.27   28.68
  -4  -4   2  853.14   18.48
  -4   4   2  848.36   17.82
   4  -4  -2  832.67   17.62
  -4  -4   2  837.80   18.57
  -4   4   2  865.49   18.36
   4  -4  -2  833.90   17.88
   4   4  -2  815.93   18.64
   4   4  -2  859.49   18.40
   4   4  -1  203.59    5.51
  -4   4   1  205.65    4.85
  -4  -4   1  217.28    5.59
   4  -4  -1  205.21    4.74
  -4   4   1  212.40    5.29
   4  -4  -1  210.04    4.98
   4   4   0  978.45   21.80
  -4  -4   0 1005.12   21.38
  -4   4   0 1002.55   21.30
   4  -4   0  977.75   21.26
  -4   4   0 1012.47   21.60
  -4  -4   0  984.97   21.94
   4  -4   0 1016.65   21.42
   4   4   1  866.25   19.02
  -4   4  -1  856.28   18.63
   4  -4   1  842.83   18.65
   4   4   1  875.79   19.04
   4  -4   1  875.23   18.75
  -4   4  -1  844.31   18.79
  -4  -4  -1  884.10   19.26
  -4  -4  -1  868.10   18.46
   4  -4   2  240.60    6.11
  -4   4  -2  249.25    6.03
  -4  -4  -2  254.19    6.57
   4  -4   2  244.04    6.09
  -4  -4  -2  250.91    5.61
  -4   4  -2  250.59    6.11
   4   4   2  238.80    6.34
  -4  -4  -3  329.65    8.30
  -4   4  -3  328.54    7.81
   4  -4   3  324.86    7.94
  -4   4  -3  333.13    7.85
   4   4   3  327.24    8.08
  -4  -4  -3  328.79    7.17
  -4  -4  -4  570.89   12.05
   4  -4   4  557.30   13.12
  -4   4  -4  597.12   13.02
   4  -4   4  555.52   13.04
   4   4   4  573.70   13.13
  -4   4  -4  556.00   12.91
  -4   4  -5  278.23    7.00
  -4   4  -5  287.74    7.15
  -4   4  -5  286.37    7.23
   4  -4   5  277.56    7.20
   4   4   5  295.87    7.32
  -4   4  -6   87.62    3.09
  -4   4  -6   93.50    3.37
   4   4   6   97.41    3.37
   4  -4   6   94.84    3.30
  -4  -4  -6   88.11    3.56
  -4   4  -6   96.32    3.29
  -4  -4  -7 1181.07   26.24
   4  -4   7 1138.05   26.09
  -4   4  -7 1156.63   25.57
  -4   4  -7 1145.78   25.83
   4   4   7 1243.53   25.76
   4   4   7 1217.19   25.92
  -4   4  -7 1208.08   26.06
   4  -4   7 1121.96   25.76
   4  -4   8  574.45   14.06
  -4   4  -8  564.83   13.46
  -4   4  -8  578.71   13.74
   4   4   8  617.78   13.84
   4   4   8  606.35   13.85
  -4  -4  -8  587.47   14.13
   4  -4   9  357.61    9.47
  -4  -4  -9  357.41    9.48
  -4   4  -9  356.52    8.84
   4   4   9  360.72    9.08
   4   4   9  363.84    9.16
  -4   4  -9  364.28    9.16
   4   4   9  358.75    9.22
   4  -4  10   30.13    2.43
  -4   4 -10   31.13    2.06
   4   4  10   30.65    2.21
  -4  -4 -10   26.34    2.43
   4   4  10   32.14    2.26
   4   4  10   32.09    2.39
  -4   4 -10   25.07    2.22
   4  -4  11  137.65    5.00
   4   4  11  136.34    4.45
   4   4  11  130.52    4.69
  -4   4 -11  133.30    4.29
  -4  -4 -11  137.59    4.94
   4  -4  12   63.54    3.54
   4   4  12   74.05    3.06
   4   4  12   70.03    3.38
  -4   4 -12   69.43    2.96
  -4  -4 -12   66.10    3.47
   4  -4  13   91.21    4.32
   4   4  13   88.07    3.42
   4   4  13   81.34    3.81
  -4   4 -13   91.69    3.48
   4   5 -13   37.27    2.42
   4   5 -13   42.86    3.04
  -4  -5  13   40.19    2.56
  -4  -5  13   41.37    2.75
  -4   5  12   36.88    1.68
   4   5 -12   30.71    2.16
   4   5 -12   37.29    2.79
  -4  -5  12   34.52    2.55
  -4  -5  12   37.86    2.38
  -4  -5  11    7.25    1.95
  -4   5  11    5.70    0.97
  -4  -5  11    5.78    1.73
  -4   5  11    6.61    1.03
  -4   5  11    6.91    1.12
   4   5 -11    6.60    1.51
   4   5 -11    8.97    1.93
  -4   5  11    6.84    1.09
  -4  -5  11    7.30    1.75
  -4   5  10    2.90    0.81
  -4   5  10    2.86    0.86
   4   5 -10    1.45    1.36
   4   5 -10    1.88    1.69
  -4  -5  10    4.28    1.67
  -4   5  10    1.54    1.14
  -4   5  10    1.05    1.07
  -4  -5  10    2.02    1.58
  -4  -5  10    0.30    1.61
  -4  -5   9    0.72    1.59
  -4   5   9    1.02    0.69
   4   5  -9    0.92    1.28
  -4   5   9    0.23    1.19
   4   5  -9    0.62    0.49
  -4   5   9    0.62    0.73
   4   5  -9    0.99    1.77
  -4   5   9    1.14    0.76
   4  -5  -9    0.33    1.11
   4   5  -9    0.72    0.54
  -4  -5   9    1.15    1.44
  -4   5   8   47.41    1.36
  -4  -5   8   51.43    2.75
  -4   5   8   48.96    1.56
  -4   5   8   45.91    1.62
  -4  -5   8   49.58    2.50
   4   5  -8   49.97    1.60
   4   5  -8   47.88    2.27
   4  -5  -8   50.09    1.93
  -4  -5   7   98.84    3.64
  -4   5   7   98.54    2.46
  -4   5   7   93.21    2.55
  -4  -5   7   98.32    3.51
   4   5  -7   97.09    2.71
   4  -5  -7   97.91    2.82
   4   5  -7   98.96    3.34
  -4  -5   6  221.33    6.06
   4   5  -6  213.19    5.25
  -4  -5   6  213.67    5.92
  -4   5   6  212.33    4.93
   4   5  -6  216.87    5.73
   4  -5  -6  217.19    5.18
  -4   5   5    3.90    0.59
   4   5  -5    3.67    1.15
   4   5  -5    4.50    0.97
  -4  -5   5    3.86    1.22
  -4  -5   5    4.41    1.27
   4  -5  -5    3.88    0.86
   4   5  -4 1136.97   25.16
   4   5  -4 1163.29   24.62
  -4   5   4 1117.94   24.03
   4   5  -4 1129.40   24.88
  -4  -5   4 1152.42   24.98
  -4  -5   4 1164.36   25.01
   4  -5  -4 1149.84   24.29
  -4  -5   3  396.00    9.52
   4   5  -3  406.17    9.36
   4   5  -3  398.65    9.73
  -4   5   3  403.08    8.75
   4  -5  -3  382.80    8.94
  -4  -5   3  407.64    9.57
  -4   5   3  412.68    9.40
   4   5  -3  387.58    9.49
   4   5  -2  756.44   16.85
   4  -5  -2  747.89   15.66
   4   5  -2  758.71   16.63
  -4   5   2  763.62   16.58
   4  -5  -2  744.26   16.09
  -4   5   2  726.85   16.00
  -4  -5   2  741.67   16.63
   4   5  -1  144.03    4.25
  -4   5   1  139.41    3.62
  -4  -5   1  144.95    4.39
   4  -5  -1  141.71    3.46
  -4   5   1  141.65    4.04
   4  -5  -1  143.93    3.75
  -4  -5   1  147.32    4.09
   4  -5   0   64.30    2.02
  -4   5   0   64.72    2.12
   4  -5   0   64.33    2.23
  -4   5   0   64.92    1.96
  -4   5   0   63.39    2.42
  -4  -5   0   65.26    2.81
   4   5   0   65.95    2.61
   4  -5   1   13.40    1.19
   4   5   1   13.50    1.40
   4   5   1   14.47    1.52
   4  -5   1   12.89    1.06
  -4  -5  -1   14.84    1.10
  -4   5  -1   13.91    1.07
  -4  -5  -1   12.03    1.63
  -4   5  -1   11.26    1.28
  -4   5  -1   13.98    1.13
   4   5   2  114.79    3.70
  -4   5  -2  109.03    3.29
   4  -5   2  113.33    3.35
  -4  -5  -2  110.29    3.87
   4   5   2  117.36    3.56
  -4   5  -2  113.22    3.28
  -4   5  -2  108.91    3.40
  -4  -5  -2  113.91    2.97
   4  -5   2  110.42    3.40
  -4   5  -3   35.69    1.76
   4  -5   3   37.51    1.87
  -4  -5  -3   31.61    2.21
  -4   5  -3   35.66    1.76
   4  -5   3   36.57    1.86
  -4  -5  -3   34.43    1.25
   4   5   3   34.08    1.99
  -4   5  -4   27.09    1.66
   4  -5   4   27.73    1.81
   4   5   4   27.32    1.88
  -4   5  -4   26.98    1.73
  -4  -5  -4   26.22    0.95
   4   5   5   48.42    2.44
  -4   5  -5   48.53    2.31
   4  -5   5   51.88    2.53
  -4   5  -5   46.46    2.31
  -4  -5  -5   50.61    1.29
  -4   5  -5   48.80    2.23
  -4   5  -6 1030.21   22.86
  -4   5  -6 1032.00   23.11
   4  -5   6 1067.09   23.51
  -4  -5  -6 1053.34   23.64
  -4   5  -6 1065.50   23.33
   4   5   6 1036.58   23.21
  -4   5  -7   63.89    2.86
  -4   5  -7   62.69    2.92
  -4  -5  -7   58.03    3.18
  -4   5  -7   56.34    2.56
   4   5   7   61.68    2.89
  -4   5  -8  175.96    5.12
  -4   5  -8  179.15    5.47
   4  -5   8  188.78    5.82
   4   5   8  186.81    5.26
  -4   5  -8  187.41    5.67
   4   5   8  185.65    5.48
  -4  -5  -8  180.39    5.86
   4  -5   9   21.08    2.24
  -4   5  -9   23.51    1.97
   4   5   9   24.86    2.03
  -4   5  -9   23.37    2.09
   4   5   9   22.37    2.04
  -4   5  -9   26.85    2.22
  -4  -5  -9   26.81    2.45
   4   5   9   24.84    2.13
  -4   5 -10   78.22    3.05
   4   5  10   76.45    3.26
   4   5  10   77.46    3.31
  -4  -5 -10   71.68    3.64
   4  -5  10   73.96    3.64
  -4  -5 -11   71.17    3.68
   4   5  11   71.73    3.18
   4   5  11   72.28    3.37
  -4   5 -11   72.98    3.01
   4  -5  11   66.32    3.54
   4  -5  12    0.50    1.90
  -4   5 -12   -0.91    1.51
   4   5  12    0.30    1.77
   4   5  12    2.57    1.67
  -4  -6  13   14.16    2.15
   4   6 -13    6.85    2.24
  -4  -6  13   11.59    2.11
  -4  -6  12   20.80    2.29
   4   6 -12   23.37    2.08
   4   6 -12   21.89    2.52
  -4  -6  12   22.39    2.24
  -4   6  11   86.37    2.62
   4   6 -11   79.03    3.93
  -4   6  11   84.51    2.67
  -4   6  11   85.16    2.90
  -4  -6  11   84.81    3.75
  -4  -6  11   86.80    3.56
   4   6 -10    8.24    0.61
  -4   6  10   10.74    0.79
  -4  -6  10    8.11    1.93
  -4   6  10   12.45    1.04
   4   6 -10   12.26    2.17
  -4  -6  10   12.09    1.94
   4   6 -10    8.49    0.69
  -4   6  10    9.94    1.10
   4  -6 -10   11.33    1.34
  -4   6  10    8.67    1.47
   4   6 -10   10.49    1.64
  -4   6   9  345.45    7.82
   4   6  -9  356.89    8.81
  -4   6   9  360.29    8.79
   4   6  -9  354.42    7.73
  -4   6   9  326.18    7.92
  -4  -6   9  354.80    9.29
  -4  -6   9  347.29    9.14
   4  -6  -9  349.59    8.09
   4   6  -9  342.00    7.76
   4   6  -8    5.42    1.45
  -4  -6   8    5.05    1.67
  -4   6   8    3.76    0.76
  -4   6   8    4.87    0.86
  -4  -6   8    5.75    1.63
   4   6  -8    4.35    0.97
   4  -6  -8    4.82    1.06
   4   6  -7   47.80    1.93
   4   6  -7   47.19    2.38
  -4  -6   7   46.62    2.59
  -4  -6   7   49.17    2.58
  -4   6   7   45.62    1.66
   4  -6  -7   46.54    1.81
  -4  -6   6    2.66    1.46
   4   6  -6    4.38    1.13
   4  -6  -6    5.45    0.99
  -4  -6   6    4.37    1.45
  -4   6   6    4.47    0.79
   4   6  -6    5.37    1.40
  -4  -6   5   61.26    2.74
   4   6  -5   62.68    2.42
  -4  -6   5   65.54    2.81
   4  -6  -5   60.84    2.05
   4   6  -5   63.15    2.66
  -4   6   5   62.63    1.95
   4   6  -5   63.48    2.91
   4   6  -4   14.24    1.67
  -4  -6   4   16.08    1.69
   4   6  -4   14.80    1.47
  -4  -6   4   16.09    1.59
   4  -6  -4   15.54    1.12
  -4   6   4   18.16    1.03
   4   6  -4   18.48    1.57
  -4  -6   3  386.82    9.59
   4   6  -3  394.35    9.85
  -4   6   3  396.95    8.89
   4   6  -3  405.37    9.54
   4   6  -2  114.07    3.85
   4   6  -2  109.45    3.69
  -4   6   2  115.83    3.62
  -4  -6   2  102.86    3.56
   4  -6  -2  117.98    3.19
   4  -6  -2  114.78    2.64
  -4   6   2  114.38    3.09
  -4   6   1  220.90    5.35
   4   6  -1  224.21    6.03
  -4   6   1  207.32    5.01
  -4   6   1  225.22    5.83
   4  -6  -1  227.08    5.50
  -4  -6   1  221.78    5.75
   4  -6  -1  219.98    5.08
   4   6   0  145.59    4.46
  -4   6   0  147.62    3.95
   4  -6   0  150.75    3.83
  -4   6   0  141.51    3.73
   4   6   0  146.53    4.45
  -4   6   0  149.18    4.30
   4  -6   0  152.56    4.16
   4  -6   1  626.63   13.93
   4   6   1  621.32   14.48
  -4  -6  -1  628.99   14.76
  -4   6  -1  638.49   13.86
   4   6   1  628.95   14.47
  -4   6  -1  615.93   14.20
   4   6   1  616.60   14.42
  -4   6  -1  618.10   13.97
   4  -6   1  638.96   14.24
   4   6   2  244.44    6.40
  -4   6  -2  239.14    6.14
   4   6   2  249.55    6.57
  -4  -6  -2  248.99    6.87
   4  -6   2  252.06    6.17
   4  -6   2  247.40    6.35
  -4   6  -2  240.80    6.07
  -4   6  -2  232.31    6.20
  -4  -6  -2  236.41    5.77
   4   6   3  114.97    4.04
  -4   6  -3  124.67    3.78
   4  -6   3  123.83    3.86
  -4  -6  -3  123.63    3.19
  -4   6  -3  124.39    3.75
   4   6   3  123.19    3.97
   4  -6   3  127.95    3.98
  -4  -6  -3  129.34    4.43
   4   6   4  397.19    9.81
  -4   6  -4  401.01    9.52
   4  -6   4  384.80    9.60
  -4   6  -4  401.91    9.56
   4  -6   4  393.42    9.68
  -4   6  -4  379.75    9.38
  -4  -6  -4  396.84    8.58
  -4  -6  -5  253.77    5.53
  -4   6  -5  252.39    6.68
   4  -6   5  255.45    6.92
  -4   6  -5  258.03    6.59
  -4   6  -5  259.20    6.81
   4   6   5  257.63    6.95
  -4  -6  -6   48.51    2.98
   4   6   6   48.33    2.61
  -4   6  -6   47.10    2.44
  -4   6  -6   47.37    2.32
  -4   6  -6   49.88    2.55
   4  -6   6   49.67    2.62
  -4   6  -7  889.00   19.74
  -4  -6  -7  927.30   20.75
  -4   6  -7  880.93   20.06
   4  -6   7  889.44   20.45
  -4   6  -7  890.45   20.27
   4   6   7  859.48   20.10
  -4  -6  -8    1.95    2.04
   4   6   8    1.34    1.67
   4  -6   8    0.79    1.65
   4  -6   8    0.20    1.60
  -4   6  -8    2.18    1.51
  -4   6  -8   -0.08    1.53
  -4   6  -8    1.01    1.67
  -4   6  -9  318.82    8.09
   4  -6   9  307.54    8.93
  -4   6  -9  310.31    8.51
  -4  -6  -9  336.79    9.05
  -4   6  -9  319.95    8.78
   4   6   9  317.53    8.32
   4   6   9  329.21    8.53
   4  -6   9  324.31    8.93
   4   6  10   42.60    2.64
   4  -6  10   39.68    2.88
   4   6  10   39.89    2.63
   4   6  10   43.92    2.51
  -4   6 -10   45.40    2.94
  -4   6 -10   42.83    2.41
  -4   6 -11   71.75    3.07
   4   6  11   79.42    3.48
   4   6  11   76.22    3.42
   4  -6  11   75.12    3.83
   4   6  12    4.44    1.85
   4  -6  12    4.49    2.14
   4   6  12    2.17    1.80
  -4   6 -12    2.69    1.62
  -4  -7  12    2.17    1.97
   4   7 -12    2.72    2.10
  -4  -7  12    1.48    1.90
  -4   7  11    0.98    1.26
   4   7 -11    2.19    1.56
   4   7 -11    1.24    0.39
   4   7 -11    1.13    2.05
  -4  -7  11    1.74    1.74
   4   7 -10   19.98    1.19
  -4   7  10   20.02    1.90
   4   7 -10   17.63    1.89
  -4  -7  10   19.48    2.26
  -4   7  10   19.73    1.25
  -4   7  10   18.65    1.30
   4   7 -10   20.86    1.06
   4  -7 -10   20.59    1.49
   4   7  -9  140.78    4.50
  -4  -7   9  141.33    4.98
   4   7  -9  129.91    3.66
   4  -7  -9  137.57    3.73
  -4   7   9  135.65    3.54
  -4   7   9  125.85    3.66
  -4  -7   9  146.18    4.95
  -4   7   9  144.76    4.71
   4   7  -8   26.53    2.01
  -4  -7   8   25.41    2.36
   4   7  -8   22.06    1.56
  -4   7   8   24.95    1.19
  -4   7   8   24.34    1.37
  -4  -7   8   24.03    2.23
   4  -7  -8   23.50    1.40
  -4  -7   7  100.47    3.83
   4   7  -7  102.51    4.10
   4   7  -7   93.80    3.12
  -4  -7   7   93.77    3.72
  -4   7   7   94.82    2.82
   4   7  -7   98.05    3.53
   4  -7  -7   92.02    2.78
   4  -7  -6   85.40    2.56
  -4  -7   6   80.24    3.48
   4   7  -6   79.81    3.61
   4   7  -6   85.89    3.00
  -4  -7   6   80.59    3.42
  -4   7   6   82.51    2.56
   4   7  -6   82.43    3.23
  -4   7   5   19.69    1.21
   4   7  -5   16.06    1.77
   4   7  -5   18.43    1.98
   4  -7  -5   18.89    1.30
   4   7  -5   17.91    1.68
  -4  -7   5   14.86    1.82
  -4  -7   4   44.34    2.42
   4   7  -4   43.95    2.54
   4   7  -4   50.61    2.36
  -4  -7   4   46.12    2.53
   4  -7  -4   46.63    1.83
   4   7  -4   46.43    2.43
  -4   7   4   48.53    1.81
  -4  -7   3  106.06    3.69
   4   7  -3  108.48    3.91
   4   7  -3  114.18    3.75
  -4   7   3  104.79    3.07
   4   7  -2  125.88    4.21
  -4  -7   2  124.24    4.00
  -4   7   2  121.56    2.96
   4   7  -2  124.34    4.07
   4  -7  -2  126.04    3.58
  -4   7   2  125.88    3.49
   4  -7  -2  127.44    2.97
  -4   7   1  215.42    5.37
   4   7  -1  211.55    5.99
   4  -7  -1  215.66    5.03
  -4   7   1  207.94    5.00
   4   7  -1  201.00    5.95
  -4   7   1  213.35    5.82
   4  -7  -1  215.74    5.53
   4  -7   0   26.26    1.36
  -4   7   0   25.90    1.35
  -4   7   0   25.79    1.88
   4   7   0   25.38    1.90
   4  -7   0   27.99    1.68
   4   7   0   23.81    1.92
  -4   7   0   26.10    1.52
  -4   7  -1   26.05    1.62
   4  -7   1   30.77    1.59
  -4   7  -1   27.67    1.54
   4   7   1   28.69    1.93
   4   7   1   28.77    2.00
  -4   7  -1   26.93    1.88
   4  -7   1   25.07    1.73
   4   7   2  374.68    9.59
  -4   7  -2  387.26    9.28
   4  -7   2  385.25    9.24
   4   7   2  385.04    9.79
  -4   7  -2  403.36    9.27
   4   7   2  392.73    9.77
   4  -7   2  385.89    9.56
  -4   7  -3  165.14    4.80
   4   7   3  165.40    5.18
   4   7   3  167.22    5.03
   4  -7   3  164.58    4.82
  -4   7  -3  181.08    4.89
  -4  -7  -3  165.63    4.26
   4  -7   3  170.60    5.10
   4   7   4    0.72    1.44
  -4  -7  -4   -0.24    0.77
   4  -7   4    0.28    1.33
  -4   7  -4    0.06    1.33
  -4   7  -4    1.10    1.34
  -4   7  -4   -0.07    1.33
   4   7   4   -0.59    1.55
   4  -7   4   -1.19    1.42
  -4   7  -5    6.94    1.51
   4  -7   5    7.78    1.56
   4  -7   5    6.51    1.56
  -4   7  -5    6.52    1.55
  -4   7  -5    7.50    1.53
   4   7   5    5.83    1.52
   4   7   5    6.68    1.72
  -4  -7  -5    7.41    0.67
  -4   7  -6  243.14    6.40
   4  -7   6  249.61    6.70
  -4   7  -6  249.86    6.60
   4   7   6  247.84    6.64
  -4   7  -6  239.02    6.15
  -4   7  -7    6.78    1.58
   4  -7   7    8.03    1.94
   4   7   7   10.51    1.79
  -4   7  -7    6.78    1.66
  -4   7  -7    8.04    1.81
   4   7   8    3.02    1.68
  -4   7  -8    4.34    1.50
   4  -7   8    2.74    1.80
  -4   7  -8    2.56    1.65
  -4   7  -8    2.98    1.81
   4  -7   9    1.36    1.71
   4   7   9   -0.46    1.71
  -4   7  -9    3.57    1.57
  -4   7  -9   -0.21    1.74
   4   7   9    0.46    1.43
   4   7   9   -0.95    1.39
  -4   7 -10  114.37    3.93
   4   7  10  113.56    4.05
  -4   7 -10  116.61    4.59
   4   7  10  115.27    4.32
   4  -7  10  119.38    4.70
   4   7  11   14.99    2.02
  -4   7 -11   13.31    2.19
  -4   7 -11   14.09    1.88
   4  -7  11   13.74    2.34
   4   7  11   19.23    2.17
  -4  -8  12    9.20    2.20
   4   8 -12   12.02    2.60
   4   8 -11    1.02    0.76
   4   8 -11    1.55    0.94
   4  -8 -11    1.85    1.17
  -4   8  11    0.85    1.46
  -4  -8  11    1.06    1.91
   4   8 -10  231.69    5.67
  -4   8  10  246.03    6.73
  -4   8  10  218.54    5.50
   4   8 -10  223.99    5.45
  -4  -8  10  227.69    7.07
   4  -8 -10  227.18    5.65
  -4   8   9   13.16    1.28
   4   8  -9   14.49    1.44
  -4   8   9   10.89    2.17
   4   8  -9   12.26    1.79
  -4   8   9   13.75    1.09
  -4  -8   9   12.53    2.06
   4  -8  -9   15.61    1.30
   4   8  -8    1.10    1.58
  -4  -8   8    1.02    1.68
  -4   8   8    1.76    1.02
   4   8  -8   -1.17    1.96
   4  -8  -8    0.97    0.99
   4   8  -8    1.55    1.23
  -4  -8   8    2.07    1.70
  -4  -8   7  314.15    8.60
   4  -8  -7  308.89    7.35
   4   8  -7  310.75    8.86
   4   8  -7  321.82    7.93
  -4  -8   7  320.85    8.71
  -4   8   7  310.41    7.50
   4   8  -7  331.69    8.42
   4   8  -6  180.84    5.82
  -4  -8   6  171.52    5.61
  -4   8   6  177.51    4.66
   4   8  -6  185.13    5.20
  -4  -8   6  175.21    5.69
   4  -8  -6  173.37    4.51
   4   8  -6  182.24    5.47
   4   8  -5   16.67    1.85
   4  -8  -5   15.93    1.30
   4   8  -5   20.10    2.14
   4   8  -5   15.78    1.82
  -4  -8   5   15.06    1.94
  -4  -8   5   19.49    2.02
  -4   8   5   15.55    1.31
  -4  -8   4   37.07    2.38
   4   8  -4   42.26    2.58
  -4  -8   4   38.20    2.52
   4   8  -4   41.62    2.40
  -4   8   4   37.65    1.77
   4   8  -3  360.95    9.46
   4   8  -3  361.27    9.24
  -4   8   3  365.83    8.56
   4  -8  -2   33.33    1.17
   4   8  -2   31.33    2.21
  -4   8   2   32.60    1.24
   4  -8  -2   33.03    1.80
   4   8  -2   31.22    2.30
  -4   8   2   34.60    1.75
  -4   8   1   58.39    2.33
   4  -8  -1   59.90    1.96
   4   8  -1   56.79    2.85
  -4   8   1   60.22    2.00
   4   8  -1   57.92    2.93
   4  -8  -1   62.68    2.49
   4   8  -1   56.76    2.84
  -4   8   0  152.33    4.43
   4   8   0  158.04    4.97
   4  -8   0  162.08    4.22
  -4   8   0  154.37    4.19
  -4   8   0  162.18    4.88
   4   8   0  162.83    5.07
   4  -8   0  159.41    4.69
   4   8   1  139.44    4.66
  -4   8  -1  146.25    4.25
   4  -8   1  144.83    4.08
  -4   8  -1  139.39    4.05
   4   8   1  145.22    4.78
  -4   8  -1  144.95    4.52
   4  -8   1  147.52    4.53
   4   8   2    6.09    1.56
  -4   8  -2    4.78    1.31
   4  -8   2    6.53    1.30
   4   8   2    3.83    1.76
  -4   8  -2    6.80    1.35
   4   8   2    8.02    1.76
   4  -8   2    6.66    1.50
   4   8   3   72.62    3.13
  -4   8  -3   78.72    2.98
  -4   8  -3   69.25    2.84
   4  -8   3   70.28    2.84
   4   8   3   71.67    3.31
   4   8   3   72.80    3.31
   4  -8   3   74.85    3.18
   4   8   4    5.35    1.63
  -4   8  -4    4.56    1.52
   4  -8   4    2.98    1.39
  -4   8  -4    3.96    1.44
   4  -8   4    3.36    1.62
  -4   8  -4    5.44    1.51
   4   8   4    3.26    1.64
  -4  -8  -4    4.18    0.99
   4   8   4    4.77    1.81
  -4   8  -5    5.09    1.56
   4  -8   5    4.61    1.54
  -4   8  -5    7.33    1.54
   4  -8   5    4.51    1.55
  -4   8  -5    2.85    1.56
   4   8   5    4.96    1.83
   4   8   5    5.98    1.57
  -4  -8  -5    6.45    0.79
   4   8   6   14.02    1.86
   4  -8   6   14.63    2.02
  -4   8  -6   13.05    1.75
  -4   8  -6   17.50    1.96
   4  -8   6   13.94    2.07
  -4   8  -6   12.87    1.94
   4   8   6   13.14    2.01
  -4  -8  -6   12.47    0.62
  -4   8  -7   56.36    2.85
   4   8   7   53.57    2.99
   4  -8   7   55.72    3.07
  -4   8  -7   55.87    2.96
   4   8   7   57.61    2.89
  -4   8  -7   51.64    2.59
  -4   8  -8    3.08    1.57
   4   8   8    1.83    1.75
  -4   8  -8   -0.80    1.81
  -4   8  -9  141.59    4.49
  -4   8  -9  134.66    4.97
   4   8   9  140.14    4.90
  -4   8 -10  217.45    6.09
   4   8  10  206.58    6.16
  -4   8 -10  229.24    7.01
   4  -8  10  219.69    7.15
   4   8  10  220.26    6.65
  -4   8 -11   96.61    3.75
   4   8  11   97.27    3.90
  -4   8 -11  105.07    4.45
   4   8  11  105.12    4.17
  -4   9  11   43.93    2.73
  -4  -9  11   44.05    3.21
   4   9 -11   48.62    2.04
   4  -9 -11   47.43    2.02
  -4   9  10    3.44    1.95
   4   9 -10   -0.29    1.05
   4  -9 -10    1.15    1.09
  -4  -9  10   -1.34    1.96
   4   9 -10    1.13    1.24
  -4   9   9    8.84    2.35
   4   9  -9    6.97    1.47
   4   9  -9   11.35    2.37
  -4   9   9    3.88    0.91
  -4  -9   9    5.28    2.01
   4  -9  -9    7.39    1.15
   4   9  -8   53.34    2.92
   4   9  -8   55.69    3.33
   4   9  -8   54.48    2.54
  -4  -9   8   55.94    3.23
  -4   9   8   51.06    2.18
   4  -9  -8   51.03    1.99
  -4   9   7    9.08    1.30
   4   9  -7   10.06    1.80
   4   9  -7    5.87    1.62
   4  -9  -7    9.30    1.18
  -4  -9   7    8.18    2.04
  -4  -9   6  461.77   11.79
   4   9  -6  474.25   12.19
   4   9  -6  473.73   11.69
  -4   9   6  476.45   10.90
  -4  -9   6  448.65   11.96
   4  -9  -6  472.01   10.64
   4   9  -6  473.18   11.45
   4   9  -5   15.60    2.02
  -4   9   5   19.57    1.49
   4   9  -5   18.59    2.04
   4   9  -5   15.22    2.13
  -4  -9   5   15.19    2.13
   4  -9  -5   14.82    1.37
  -4   9   4   -1.00    1.13
   4   9  -4    1.98    1.74
   4   9  -4    0.26    1.75
  -4  -9   4    0.96    1.73
  -4   9   3  206.25    5.25
   4   9  -3  206.00    6.11
  -4   9   3  186.81    4.32
   4   9  -3  200.42    5.95
   4  -9  -2   -0.19    0.65
   4   9  -2    0.37    1.70
  -4   9   2   -0.45    1.20
   4   9  -2   -0.10    1.66
  -4   9   2   -0.11    0.77
   4  -9  -2    0.24    1.15
   4  -9  -1   14.93    1.10
  -4   9   1   14.33    1.46
   4   9  -1   15.07    1.89
   4   9  -1   14.00    1.95
  -4   9   1   13.78    1.16
   4  -9  -1   13.79    1.61
   4   9  -1   15.09    2.11
  -4   9   0  318.49    7.84
   4   9   0  302.94    8.36
  -4   9   0  316.65    7.52
  -4   9   0  315.67    8.25
   4  -9   0  321.34    8.14
   4   9   0  300.90    8.37
   4  -9   0  307.31    7.46
   4   9   1   69.75    3.21
  -4   9  -1   73.03    2.72
  -4   9  -1   67.50    3.11
   4   9   1   74.23    3.40
   4  -9   1   73.29    3.12
  -4   9  -1   73.80    2.86
   4  -9   1   74.81    2.71
   4   9   2   12.31    1.73
   4  -9   2   14.74    1.84
  -4   9  -2   17.31    1.68
   4  -9   2   15.48    1.54
   4   9   2   11.92    2.13
  -4   9  -2   14.61    1.59
   4   9   2   13.09    2.00
   4   9   3  961.50   21.79
  -4   9  -3  943.79   21.42
   4  -9   3  943.37   21.38
   4   9   3  958.35   22.05
  -4   9  -3  963.00   21.43
   4   9   3  983.76   22.04
   4  -9   3  960.68   21.89
   4   9   4   16.44    2.17
   4  -9   4   17.05    1.92
  -4   9  -4   18.25    1.86
   4   9   4   12.33    1.85
  -4   9  -4   20.55    2.00
   4   9   4   17.87    2.24
  -4   9  -4   21.91    2.05
   4  -9   4   22.94    2.29
   4   9   5   31.38    2.33
   4  -9   5   25.88    2.35
   4  -9   5   30.86    2.23
   4   9   5   28.66    2.53
  -4   9  -5   29.67    2.24
   4   9   5   27.35    2.49
  -4   9  -5   29.51    2.17
  -4  -9  -5   28.63    1.34
  -4   9  -6   70.29    3.25
   4  -9   6   69.02    3.30
   4   9   6   72.79    3.54
   4  -9   6   73.66    3.57
  -4   9  -6   76.78    3.39
  -4   9  -6   77.61    3.11
  -4  -9  -6   74.95    1.92
   4   9   6   66.64    3.22
   4   9   7   65.15    3.10
   4  -9   7   62.16    3.27
  -4   9  -7   66.43    3.22
   4  -9   7   59.92    3.43
  -4   9  -7   64.78    2.92
   4   9   7   61.71    3.27
   4   9   8   26.95    2.24
  -4   9  -8   28.46    2.17
   4   9   8   29.28    2.59
  -4   9  -8   31.65    2.60
  -4   9  -9    6.31    1.73
   4   9   9    9.85    2.08
  -4   9  -9    6.57    2.01
   4   9   9    6.71    1.81
   4   9  10   26.68    2.36
  -4   9 -10   28.55    2.72
   4   9  10   29.34    2.58
   4   9  10   23.17    2.00
  -4  10  10    0.72    2.19
   4  10 -10   -0.43    2.20
   4  10 -10    2.17    1.41
  -4 -10  10    0.65    2.12
   4  10 -10    1.53    1.17
   4 -10 -10    2.18    1.09
   4  10  -9    2.76    2.03
   4  10  -9    3.40    1.50
   4 -10  -9    4.81    1.12
  -4 -10   9    3.93    2.18
  -4  10   9    9.38    2.63
   4  10  -8   15.79    2.48
  -4 -10   8   15.27    2.37
   4  10  -8   10.58    1.71
  -4  10   8   13.51    2.94
   4 -10  -8   12.41    1.26
  -4  10   7   70.82    2.70
   4  10  -7   75.60    3.92
   4  10  -7   74.95    3.26
   4 -10  -7   70.34    2.44
   4 -10  -6   47.33    2.05
   4  10  -6   48.80    3.16
   4  10  -6   50.17    2.88
  -4 -10   6   45.31    3.03
   4  10  -6   50.36    2.81
  -4  10   6   44.63    2.22
   4  10  -5  221.78    6.98
  -4  10   5  221.82    5.88
  -4 -10   5  210.03    6.77
   4 -10  -5  227.43    5.65
   4  10  -5  213.64    6.51
   4  10  -5  223.78    6.65
   4  10  -4   60.77    3.32
  -4  10   4   58.44    2.45
   4  10  -4   55.38    3.09
  -4 -10   3   84.74    3.40
   4  10  -3   86.27    3.83
  -4  10   3   77.65    2.15
   4  10  -3   86.17    3.75
  -4  10   3   84.37    3.02
  -4 -10   2    3.15    1.67
   4  10  -2    7.27    2.00
  -4  10   2    4.66    0.92
  -4  10   2    5.29    1.34
   4  10  -2    7.77    1.85
   4  10  -2    5.69    1.93
   4 -10  -1   97.15    2.86
   4  10  -1   96.10    3.90
  -4  10   1   96.38    2.97
   4 -10  -1   98.37    3.55
   4  10  -1   89.04    3.96
   4  10  -1   95.36    3.96
  -4  10   1   98.76    3.42
  -4  10   0    2.06    1.39
   4  10   0    0.30    1.66
   4  10   0    3.10    1.76
  -4  10   0    1.35    1.16
   4 -10   0    0.90    1.50
  -4  10   0    2.47    1.76
   4 -10   0    1.33    1.09
   4  10   1  563.26   13.65
   4 -10   1  543.11   12.77
  -4  10  -1  567.85   12.87
  -4  10  -1  547.69   13.06
  -4  10  -1  562.39   13.42
   4 -10   1  566.49   13.49
   4  10   1  539.75   13.65
   4  10   2    6.82    1.75
   4 -10   2    8.11    1.45
  -4  10  -2    8.68    1.58
  -4  10  -2    5.16    1.48
   4  10   2    5.12    1.94
   4  10   2    4.18    1.94
   4 -10   2    4.20    1.71
  -4  10  -3   70.76    3.02
   4  10   3   66.74    3.22
   4 -10   3   60.80    2.80
   4  10   3   64.28    3.45
  -4  10  -3   63.84    2.90
   4  10   3   56.43    3.31
  -4  10  -3   66.78    3.06
   4 -10   3   66.32    3.27
  -4  10  -4  264.10    7.39
   4 -10   4  262.04    7.35
  -4  10  -4  278.65    7.51
   4  10   4  277.47    7.99
   4  10   4  281.91    7.94
  -4  10  -4  273.80    7.40
   4  10   4  267.04    7.66
   4 -10   4  277.70    7.89
  -4  10  -5  154.15    5.03
   4 -10   5  151.65    5.07
   4  10   5  168.55    5.58
  -4 -10  -5  150.11    3.97
  -4  10  -5  165.11    5.23
  -4  10  -5  150.63    4.90
   4 -10   5  160.11    5.54
   4  10   5  159.43    5.24
  -4  10  -6   12.01    1.82
   4  10   6   12.05    1.92
   4 -10   6    8.57    1.85
  -4 -10  -6   10.74    0.85
  -4  10  -6   14.34    2.10
   4  10   6   13.52    2.25
   4 -10   6   11.52    2.18
  -4  10  -7   17.31    2.26
   4  10   7   18.75    2.44
   4 -10   7   18.52    2.37
   4  10   7   17.87    2.09
   4  10   8    2.87    1.78
   4  10   8    3.56    2.01
  -4  10  -8   -1.98    1.84
   4 -10   8   -0.90    1.98
   4  10   9    3.86    1.81
   4  10   9    2.23    2.02
  -4  10  -9    1.27    1.96
   4  11  -9   35.34    3.24
   4 -11  -9   36.06    1.74
   4  11  -9   35.75    2.38
  -4 -11   9   35.77    3.18
  -4  11   9   43.53    3.74
   4  11  -8   37.82    3.09
   4 -11  -8   32.56    1.70
  -4 -11   8   33.47    3.00
   4  11  -8   32.48    2.42
   4  11  -7   29.58    2.90
   4  11  -7   35.46    2.58
  -4 -11   7   28.59    2.88
   4 -11  -7   32.17    1.70
   4 -11  -6  229.56    5.75
   4  11  -6  228.67    7.28
  -4 -11   6  225.95    7.14
   4  11  -6  209.54    6.63
  -4  11   6  225.00    6.07
  -4  11   5   59.71    2.57
   4  11  -5   53.40    3.32
   4 -11  -5   57.50    2.41
  -4 -11   5   56.19    3.33
   4  11  -5   58.78    3.21
   4  11  -4   12.19    2.21
   4  11  -4   14.43    2.26
  -4  11   4   12.46    1.59
  -4 -11   3   23.01    2.20
  -4  11   3   20.81    1.78
   4  11  -3   19.39    2.25
   4  11  -3   22.87    2.51
  -4  11   3   18.16    1.05
  -4 -11   2   59.87    3.01
  -4  11   2   56.43    2.07
   4  11  -2   65.60    3.34
   4  11  -2   65.08    3.51
  -4  11   2   64.48    2.74
  -4  11   1    2.71    1.38
   4  11  -1    4.34    1.69
   4 -11  -1    3.28    0.96
  -4  11   1    2.87    1.09
   4  11  -1    0.68    1.94
   4 -11  -1    2.23    1.54
   4  11  -1    2.92    1.85
   4 -11   0    1.05    1.03
  -4  11   0    0.53    1.44
  -4  11   0    0.85    1.19
   4  11   0    1.19    1.67
   4 -11   0    0.18    1.55
  -4  11   0   -0.10    1.77
   4  11   0    0.32    1.69
   4  11   0    1.62    2.06
   4 -11   1   30.60    1.85
  -4  11  -1   29.67    2.12
   4  11   1   23.84    2.43
  -4  11  -1   28.58    1.96
   4 -11   1   27.65    2.31
  -4  11  -1   29.61    2.43
   4  11   1   27.38    2.57
  -4  11  -2  138.47    4.54
   4  11   2  133.38    4.87
   4 -11   2  136.90    4.33
  -4  11  -2  140.09    4.40
   4  11   2  137.23    5.27
   4 -11   2  131.81    4.84
  -4  11  -3   29.57    2.22
   4 -11   3   32.78    2.16
   4  11   3   34.70    2.87
   4  11   3   32.06    2.53
   4 -11   3   32.94    2.55
   4  11   4    6.97    1.92
   4 -11   4   11.55    1.77
   4  11   4   11.22    2.32
  -4  11  -4   11.48    1.87
   4 -11   4   13.50    2.12
   4  11   5   23.38    2.25
   4 -11   5   22.36    2.16
  -4  11  -5   24.28    2.28
   4  11   5   23.98    2.66
   4 -11   5   23.15    2.49
  -4 -11  -5   22.23    1.44
   4  11   6    6.62    1.88
   4 -11   6   11.46    2.30
   4  11   6    8.20    2.28
  -4  11  -6   10.99    2.07
  -4 -11  -6   11.00    0.96
   4  11   7   52.66    3.22
   4  11   7   43.64    2.81
  -4  11  -7   46.35    2.98
  -4 -11  -7   39.03    1.07
   4 -11   7   49.90    3.29
   4  11   8  122.23    4.77
   4  11   8  135.73    5.21
  -4  11  -8  137.22    5.06
   4 -11   8  131.65    5.33
   4  12  -7    1.23    1.90
   4  12  -7    2.42    2.14
  -4 -12   7   -1.20    2.02
  -4  12   7    1.46    3.06
   4 -12  -7   -0.67    1.25
   4 -12  -6  239.41    6.13
   4  12  -6  241.72    7.68
  -4 -12   6  227.28    7.54
   4  12  -6  239.12    7.22
   4  12  -5  493.38   13.27
   4  12  -5  496.58   12.87
  -4  12   5  516.25   12.05
  -4  12   4   16.80    1.77
   4  12  -4   12.63    2.46
   4  12  -4   16.89    2.53
  -4  12   3   15.94    1.77
   4  12  -3   13.87    2.26
   4  12  -3   11.53    2.22
   4  12  -2   63.68    3.60
  -4  12   2   64.07    2.27
   4  12  -2   66.81    3.64
  -4  12   2   70.61    2.97
   4  12  -1   -1.48    2.11
  -4  12   1    2.40    1.44
   4  12  -1    0.70    1.73
  -4  12   1    0.65    1.09
   4 -12  -1   -0.27    1.51
   4 -12  -1    0.59    0.96
  -4  12   0   20.85    1.95
   4  12   0   19.89    2.36
  -4  12   0   15.92    1.57
   4 -12   0   18.78    2.13
   4  12   0   15.87    2.49
   4 -12   0   18.33    1.51
  -4  12  -1  146.99    4.90
   4 -12   1  154.19    4.56
   4  12   1  149.12    5.42
  -4  12  -1  156.07    4.71
   4 -12   1  160.16    5.37
   4 -12   2    0.57    1.35
   4  12   2    1.12    1.87
  -4  12  -2    2.10    1.60
  -4  12  -2    0.54    1.54
   4 -12   2    0.11    1.91
   4 -12   3   56.62    2.82
   4  12   3   58.39    3.23
   4  12   3   66.50    3.73
  -4  12  -3   57.71    2.90
   4 -12   3   55.84    3.29
   4  12   4   54.22    3.24
   4  12   4   61.01    3.67
   4 -12   4   63.14    3.07
   4 -12   4   60.56    3.42
   4  12   5   46.22    2.95
   4  12   5   52.43    3.41
  -4  12  -5   56.57    3.11
  -4 -12  -5   47.20    2.04
   4 -12   5   46.38    3.20
   4  12   6   11.53    2.51
   4  12   6   16.73    2.28
  -4  12  -6   20.54    2.33
   4 -12   6   16.64    2.34
  -4 -12  -6   15.55    1.16
   4  13  -5   -0.12    2.13
   4  13  -5    1.69    2.14
   4  13  -4   11.33    2.43
   4  13  -4   13.70    2.52
   4  13  -3   -0.90    2.21
   4  13  -3    1.85    2.09
  -4  13   3   -1.06    1.51
   4  13  -2   51.07    3.32
   4  13  -2   45.83    3.38
  -4  13   2   55.38    2.81
   4  13  -1   41.41    3.10
  -4  13   1   50.55    2.73
   4  13  -1   48.74    3.52
   4 -13   0   35.75    1.93
   4  13   0   35.83    2.87
  -4  13   0   39.36    2.14
   4 -13   0   35.98    2.68
   4  13   0   33.69    3.19
   4 -13   1    6.08    1.40
   4  13   1    4.92    1.99
  -4  13  -1    6.95    1.61
   4 -13   1    5.52    1.92
   4 -13   2   73.59    3.08
   4  13   2   73.45    3.80
  -4  13  -2   77.57    3.28
   4 -13   2   77.72    3.86
   4 -13   3  237.81    6.67
   4  13   3  230.50    7.28
   4  13   3  233.32    7.74
  -4  13  -3  236.06    6.79
   4 -13   3  229.05    7.34
   4  13   4    4.87    2.10
  -4  13  -4    6.51    1.95
   4 -13   4    5.59    2.09
  -5   0  14    3.35    1.30
   5   0 -14    3.41    1.63
  -5   0  13    0.90    1.20
   5   0 -13   -0.47    1.44
  -5   0  13   -0.84    1.63
  -5   0  13   -1.07    1.24
  -5   0  12  135.83    4.48
  -5   0  12  141.60    3.99
   5   0 -12  141.82    4.50
  -5   0  12  128.27    4.00
  -5   0  11    0.86    1.40
   5   0 -11   -0.07    1.40
  -5   0  11   -0.69    1.06
  -5   0  11    1.06    1.15
  -5   0  10  101.53    3.45
   5   0 -10   98.18    3.40
   5   0 -10   92.91    2.64
  -5   0  10   95.22    2.95
  -5   0  10   92.76    3.00
  -5   0   9   -0.77    1.22
   5   0  -9    1.54    1.22
   5   0  -9    0.59    0.75
  -5   0   9    0.44    0.87
  -5   0   9    0.81    1.07
  -5   0   8  411.54    9.67
   5   0  -8  401.55    9.71
   5   0  -8  415.21    9.02
  -5   0   8  404.70    9.17
  -5   0   8  410.97    9.39
  -5   0   7    0.56    0.99
  -5   0   7   -0.04    0.96
   5   0  -7    0.83    1.01
   5   0  -7   -0.04    0.59
  -5   0   7   -0.41    0.56
  -5   0   7    0.31    0.66
   5   0  -6 2357.32   48.74
   5   0  -6 2328.44   49.40
  -5   0   6 2319.21   48.81
  -5   0   6 2314.90   48.82
  -5   0   6 2362.00   49.30
  -5   0   6 2349.06   49.16
  -5   0   5    0.51    0.73
   5   0  -5    0.06    0.44
   5   0  -5   -0.29    0.84
  -5   0   5    0.87    0.71
  -5   0   5   -0.80    0.84
   5   0  -5   -0.07    0.70
   5   0  -4   72.32    2.22
  -5   0   4   57.24    2.02
  -5   0   4   66.77    2.04
   5   0  -4   64.65    1.97
   5   0  -4   61.46    2.25
   5   0  -4   61.48    1.69
  -5   0   4   65.56    2.08
   5   0  -3   -0.21    0.85
   5   0  -3    0.61    0.86
   5   0  -3   -0.07    0.94
  -5   0   3    1.50    0.95
   5   0  -3    0.53    0.56
  -5   0   3    0.15    0.86
  -5   0   2  497.19   11.01
   5   0  -2  487.81   10.98
   5   0  -2  490.80   10.94
   5   0  -2  495.18   10.92
  -5   0   2  492.84   10.84
   5   0  -1    1.36    0.91
  -5   0   1    1.15    1.08
  -5   0   1    0.25    0.88
   5   0  -1    2.45    0.92
   5   0   0 5855.95  122.39
  -5   0   0 5932.35  122.76
   5   0   0 5890.48  122.37
   5   0   1    0.25    1.07
   5   0   1    0.31    0.75
  -5   0  -1   -1.25    1.19
   5   0   1    0.05    0.77
   5   0   2  207.09    5.37
   5   0   2  215.30    4.92
  -5   0  -2  205.43    5.49
  -5   0  -3    1.21    1.14
   5   0   3    0.28    1.03
   5   0   3    0.16    0.64
   5   0   4  431.25    9.58
   5   0   4  454.83   10.24
   5   0   5    0.37    1.08
   5   0   5   -1.65    1.07
   5   0   5   -0.13    0.65
   5   0   6   76.18    2.81
   5   0   6   78.75    2.17
   5   0   6   70.86    2.97
   5   0   6   72.81    2.97
  -5   0  -6   77.13    2.96
   5   0   7   -0.87    1.23
  -5   0  -7    0.41    1.42
   5   0   7    0.64    1.31
   5   0   7    1.60    1.54
   5   0   7    0.48    0.72
   5   0   8   17.62    1.65
   5   0   8   14.89    1.73
  -5   0  -8   10.86    1.77
   5   0   8   13.86    1.91
   5   0   8   15.68    0.97
   5   0   9    0.06    1.40
   5   0   9   -0.32    0.73
   5   0   9   -0.26    1.56
   5   0   9   -0.75    1.73
  -5   0  -9   -1.22    1.59
  -5   0 -10  351.12    9.08
   5   0  10  342.11    9.23
   5   0  10  341.75    9.47
   5   0  10  347.04    8.74
   5   0  10  356.82    7.74
  -5   0 -11    2.27    1.66
   5   0  11    0.90    1.78
   5   0  11    0.72    1.43
   5   0  12    0.79    1.44
   5   0  12   -0.75    1.83
  -5   0 -12    2.06    1.71
   5   0  13    1.25    1.90
   5   0  13    1.15    1.50
  -5   0 -13   -1.20    1.93
   5   1 -14   44.01    2.75
   5  -1 -14   43.80    2.34
  -5   1  14   45.03    2.05
  -5  -1  14   40.56    2.11
  -5  -1  13   59.20    2.99
  -5   1  13   52.50    2.68
  -5  -1  13   50.66    2.36
  -5   1  13   56.32    2.29
   5   1 -13   54.99    2.94
   5  -1 -13   58.14    2.62
  -5  -1  13   55.22    2.54
  -5   1  13   57.32    2.30
  -5  -1  12   60.05    2.95
  -5   1  12   64.51    2.76
   5   1 -12   58.43    2.91
   5   1 -12   57.64    2.17
   5  -1 -12   62.94    2.62
  -5  -1  12   57.01    2.52
  -5   1  12   55.42    2.24
  -5   1  12   58.21    2.36
  -5  -1  12   61.87    2.45
  -5   1  11  102.51    3.07
  -5   1  11  104.85    3.56
   5   1 -11  102.43    3.81
   5   1 -11  104.72    3.10
   5  -1 -11  101.46    3.48
  -5   1  11  106.21    3.25
  -5  -1  11  101.90    3.38
  -5  -1  11  102.24    3.30
  -5  -1  11  106.48    3.79
  -5   1  10    6.59    0.93
  -5  -1  10    6.34    1.53
  -5   1  10    6.77    1.34
   5   1 -10    7.53    1.51
   5  -1 -10    6.24    1.28
   5   1 -10    5.71    1.04
  -5  -1  10    8.27    1.27
  -5  -1  10    5.63    1.31
  -5   1  10    4.89    1.15
  -5   1   9  518.03   11.93
  -5  -1   9  523.98   12.25
   5   1  -9  535.24   11.60
   5   1  -9  518.19   12.32
   5  -1  -9  507.18   11.91
  -5   1   9  515.02   11.69
  -5  -1   9  511.14   11.79
  -5   1   9  517.89   11.42
  -5  -1   9  533.15   11.84
  -5   1   8 1282.46   26.13
  -5  -1   8 1203.86   26.37
   5   1  -8 1274.65   25.78
   5   1  -8 1217.57   26.51
   5  -1  -8 1262.43   26.14
  -5  -1   8 1254.51   25.96
  -5   1   8 1233.97   25.54
  -5   1   8 1251.23   25.93
  -5  -1   8 1246.32   26.06
  -5   1   7  223.68    5.34
  -5  -1   7  219.00    5.63
   5   1  -7  219.40    5.09
  -5  -1   7  206.57    4.75
   5   1  -7  219.78    5.74
   5  -1  -7  217.32    5.38
  -5   1   7  210.04    4.85
  -5   1   7  212.69    4.76
  -5  -1   7  216.28    5.23
  -5   1   7  215.19    5.26
  -5  -1   7  216.75    5.38
   5  -1  -7  202.39    5.52
  -5   1   6   88.27    2.63
  -5  -1   6   91.69    2.93
   5   1  -6   90.55    3.01
  -5   1   6   89.27    2.43
   5  -1  -6   90.74    2.70
  -5  -1   6   93.90    2.43
  -5  -1   6   87.61    2.55
   5   1  -6   89.56    2.31
  -5   1   6   90.68    2.67
  -5  -1   6   92.60    2.77
   5  -1  -6   86.33    2.88
   5   1  -6   90.78    2.47
  -5   1   5  992.60   21.07
  -5  -1   5 1006.77   21.44
   5   1  -5  979.85   21.01
   5   1  -5  986.01   21.53
  -5   1   5  987.74   21.03
   5  -1  -5 1002.67   21.21
  -5  -1   5  954.41   21.03
   5   1  -5  998.38   20.93
  -5   1   5  983.80   21.18
  -5  -1   5  994.74   21.26
  -5  -1   4  195.37    4.85
   5   1  -4  192.99    4.95
   5  -1  -4  185.66    4.63
  -5   1   4  197.47    4.65
   5   1  -4  191.96    5.01
   5   1  -4  190.51    4.57
   5  -1  -4  192.92    4.71
   5   1  -4  182.43    4.54
  -5   1   4  194.58    4.69
  -5  -1   4  190.15    4.66
  -5  -1   4  196.28    4.74
   5   1  -3 3132.12   64.42
   5  -1  -3 3094.40   64.39
   5   1  -3 3089.88   64.72
  -5   1   3 3069.28   64.44
   5  -1  -3 2991.62   63.92
   5   1  -3 3111.28   64.68
  -5  -1   3 3104.57   64.44
  -5   1   3 3191.27   64.45
   5  -1  -3 3135.17   64.47
   5  -1  -3 3097.21   63.97
   5   1  -3 3031.72   64.35
   5  -1  -3 3154.35   64.51
  -5  -1   3 3089.32   64.50
   5   1  -2  593.40   13.27
   5  -1  -2  584.05   12.96
   5   1  -2  598.03   13.08
  -5   1   2  586.07   13.10
   5  -1  -2  596.04   12.65
   5   1  -2  603.83   13.02
  -5  -1   2  588.92   13.17
   5  -1  -2  592.69   13.11
  -5   1   2  611.89   13.04
  -5  -1   2  597.13   12.99
   5   1  -2  601.24   13.17
   5  -1  -2  597.10   13.00
  -5   1   1   -0.03    0.83
  -5  -1   1    1.14    1.05
  -5   1   1   -0.29    1.03
   5  -1  -1    0.89    0.60
   5   1  -1    0.90    0.95
   5  -1  -1   -0.38    0.83
  -5   1   0  511.42   11.61
   5  -1   0  529.43   11.33
  -5  -1   0  522.00   11.72
   5  -1   0  510.83   11.31
   5   1   0  512.95   11.35
  -5   1  -1  385.05    8.99
   5  -1   1  381.78    8.76
   5  -1   1  400.05    8.63
  -5  -1  -1  404.35    9.13
   5   1   1  383.10    8.60
  -5  -1  -1  400.22    8.61
   5  -1   1  364.38    8.94
   5   1   1  371.05    8.98
   5  -1   2    9.69    0.93
   5  -1   2   10.04    1.23
  -5  -1  -2    8.27    1.31
   5  -1   2    8.07    1.03
   5   1   2    8.25    1.18
  -5   1  -2    8.37    1.26
   5   1   2    9.15    0.82
   5   1   3  364.82    8.54
  -5   1  -3  349.16    8.49
  -5  -1  -3  349.45    8.59
   5  -1   3  357.88    8.00
   5   1   3  355.57    7.89
   5  -1   3  367.23    8.48
   5  -1   4  171.44    4.22
   5   1   4  173.68    4.08
   5  -1   4  170.29    4.70
   5  -1   5    0.42    1.06
   5   1   5   -0.87    1.12
   5   1   5    0.28    1.06
   5   1   5   -0.15    0.57
  -5  -1  -6   79.34    3.09
   5   1   6   84.36    2.98
   5  -1   6   71.92    3.04
   5   1   6   89.54    3.08
   5  -1   6   81.73    3.14
   5   1   6   81.43    3.08
  -5   1  -6   82.90    3.06
   5   1   6   78.37    2.11
   5  -1   6   84.54    2.92
  -5  -1  -7  397.20   10.11
   5   1   7  430.55    9.96
   5  -1   7  405.71   10.19
   5   1   7  444.11   10.24
   5  -1   7  395.17   10.23
   5   1   7  411.40   10.20
  -5   1  -7  405.72   10.03
   5   1   7  421.48    8.97
   5  -1   7  396.45    9.84
   5  -1   8    3.22    1.39
   5   1   8    3.12    0.63
   5   1   8    2.75    1.42
   5  -1   8    2.36    1.42
   5   1   8    2.85    1.48
   5  -1   8    3.43    1.68
   5   1   8   -0.08    1.63
  -5   1  -8    3.43    1.51
  -5  -1  -8    2.16    1.53
   5   1   9   15.36    1.74
   5  -1   9   10.98    1.90
  -5   1  -9   15.81    1.86
   5   1   9   13.09    1.86
   5  -1   9   14.84    1.99
   5   1   9   16.04    1.96
   5   1   9   13.53    0.75
   5  -1   9   14.94    1.65
  -5  -1  -9   13.72    1.87
   5  -1  10    4.98    1.45
   5   1  10    7.19    1.57
  -5  -1 -10    5.16    1.74
   5   1  10    6.38    1.78
   5  -1  10    5.66    1.91
  -5   1 -10    7.52    1.68
   5   1  10    6.42    1.93
   5  -1  10    5.28    1.81
   5   1  10    5.74    0.58
   5  -1  11   22.01    1.87
   5   1  11   18.07    1.86
   5  -1  11   20.90    2.16
   5   1  11   20.57    2.10
  -5  -1 -11   20.37    2.15
  -5   1 -11   21.55    2.03
   5   1  12    0.20    1.44
   5  -1  12    1.64    1.88
   5   1  12    1.56    1.86
   5  -1  12   -1.10    1.47
  -5  -1 -12    2.42    1.85
  -5   1 -12   -1.42    1.58
   5  -1  13   66.09    3.51
  -5   1 -13   66.22    3.33
  -5  -1 -13   68.47    3.42
   5  -1  13   64.11    2.90
   5   1  13   63.57    2.83
  -5   2  14   56.07    2.26
   5   2 -14   53.10    3.16
   5   2 -14   49.90    2.31
  -5  -2  14   54.11    2.47
  -5  -2  13   34.87    2.62
   5   2 -13   38.06    2.67
   5   2 -13   35.27    1.93
  -5  -2  13   33.33    2.23
  -5  -2  13   40.43    2.15
  -5   2  13   35.95    1.93
  -5  -2  12   57.64    2.97
  -5   2  12   57.99    2.50
  -5  -2  12   54.81    2.42
   5   2 -12   56.00    2.31
   5   2 -12   55.21    2.97
   5  -2 -12   54.15    2.31
  -5  -2  12   51.75    2.52
  -5   2  12   55.64    2.30
  -5   2  12   52.01    2.03
  -5   2  11    0.77    0.85
  -5  -2  11    3.47    1.64
  -5   2  11    1.72    1.22
   5   2 -11    1.50    1.57
   5   2 -11    1.46    1.10
   5  -2 -11   -1.20    1.09
  -5  -2  11    0.58    1.24
  -5   2  11    1.83    1.13
  -5  -2  11    2.55    1.34
  -5  -2  10    1.88    1.47
  -5   2  10    0.05    1.08
   5   2 -10    0.08    1.45
   5   2 -10    0.50    1.07
   5  -2 -10    0.05    1.01
  -5  -2  10    1.07    1.23
  -5   2  10    0.74    0.72
  -5  -2  10    1.08    1.30
  -5   2  10    2.66    1.08
  -5  -2   9  241.22    6.00
  -5   2   9  235.83    5.79
  -5  -2   9  236.08    6.38
  -5   2   9  215.07    5.08
   5   2  -9  232.93    5.76
   5   2  -9  248.28    6.59
   5  -2  -9  241.44    5.77
  -5  -2   9  234.49    5.98
  -5   2   9  231.29    5.27
  -5   2   9  239.34    5.74
  -5   2   8   39.29    1.35
  -5   2   8   38.70    1.67
  -5  -2   8   35.64    2.10
   5   2  -8   39.22    1.72
   5   2  -8   39.23    2.25
   5  -2  -8   39.53    1.66
  -5  -2   8   37.03    1.83
  -5   2   8   35.14    1.10
  -5   2   8   41.73    1.74
  -5  -2   8   39.99    1.97
   5  -2  -8   38.87    2.01
  -5   2   7  609.74   12.96
  -5   2   7  598.70   13.11
   5   2  -7  603.39   13.25
  -5  -2   7  596.83   13.76
  -5  -2   7  613.97   13.51
   5   2  -7  596.07   13.90
   5  -2  -7  595.30   13.13
  -5  -2   7  602.44   13.41
   5   2  -7  587.44   12.67
  -5   2   7  613.04   13.26
   5  -2  -7  607.10   13.49
  -5   2   6  388.73    8.58
   5   2  -6  388.66    8.82
   5  -2  -6  378.31    8.94
  -5   2   6  394.29    8.85
   5  -2  -6  387.58    8.66
  -5  -2   6  383.74    9.22
  -5  -2   6  392.10    8.65
  -5  -2   6  391.83    8.93
   5   2  -6  362.95    9.30
  -5  -2   6  392.45    9.03
   5   2  -6  386.20    8.43
  -5   2   6  390.61    8.62
   5   2  -5  252.83    6.05
  -5  -2   5  248.16    6.39
   5   2  -5  256.25    5.82
   5   2  -5  246.63    6.49
   5  -2  -5  255.39    5.86
  -5  -2   5  258.61    6.11
  -5  -2   5  255.02    6.02
  -5  -2   5  254.92    6.22
  -5   2   5  255.68    6.08
  -5   2   5  262.89    5.95
  -5  -2   4   49.22    1.98
   5   2  -4   47.95    2.05
   5  -2  -4   48.02    1.51
   5   2  -4   50.93    1.71
  -5  -2   4   47.23    1.86
  -5  -2   4   48.37    1.83
   5   2  -4   44.36    1.74
  -5   2   4   48.91    1.78
  -5   2   4   48.57    1.73
  -5  -2   3   24.61    1.50
   5  -2  -3   28.74    1.11
  -5  -2   3   30.70    1.53
   5  -2  -3   30.93    1.37
   5   2  -3   29.58    1.40
   5  -2  -3   27.00    1.47
   5   2  -3   26.38    1.34
  -5   2   3   26.72    1.34
  -5  -2   3   25.96    1.41
  -5   2   3   25.73    1.38
   5  -2  -2  313.05    6.94
   5  -2  -2  310.63    6.73
  -5  -2   2  314.27    7.38
   5   2  -2  313.06    7.25
   5   2  -2  315.37    7.28
   5  -2  -2  295.61    7.31
  -5   2   2  309.43    7.21
   5  -2  -2  314.88    7.10
  -5  -2   2  300.13    7.11
   5  -2  -1   16.39    0.86
   5  -2  -1   13.49    1.05
  -5   2   1   14.13    1.25
  -5  -2   1   14.33    1.36
   5   2  -1   14.18    1.27
  -5   2   0  678.81   15.38
   5  -2   0  700.67   15.12
   5  -2   0  711.02   15.15
   5   2   0  698.47   15.26
  -5  -2   0  711.80   15.59
  -5  -2  -1  185.80    4.29
  -5   2  -1  176.61    4.71
   5  -2   1  184.17    4.53
   5   2   1  168.71    4.77
   5  -2   1  183.09    4.54
  -5   2  -1  184.42    4.39
   5  -2   1  171.43    4.73
   5  -2   1  184.69    4.43
  -5  -2  -1  174.86    4.88
   5   2   1  177.65    4.44
   5  -2   2  610.68   13.80
  -5   2  -2  594.79   13.86
   5   2   2  631.08   14.03
   5  -2   2  625.39   13.85
  -5   2  -2  618.79   13.66
   5  -2   2  614.24   13.93
   5  -2   2  628.73   13.56
  -5  -2  -2  647.24   13.42
   5   2   2  610.62   13.49
  -5  -2  -2  643.01   14.17
   5   2   3  338.18    7.34
  -5   2  -3  323.38    7.86
   5  -2   3  302.67    7.77
   5   2   3  349.97    8.03
   5  -2   3  312.90    7.86
  -5   2  -3  330.84    7.67
   5  -2   3  322.29    7.84
  -5  -2  -3  326.92    8.07
   5   2   4   63.78    2.46
  -5   2  -4   52.16    2.09
   5   2   4   61.94    2.15
   5  -2   4   54.14    2.24
   5   2   4   54.23    1.70
   5   2   5   45.89    1.47
   5   2   5   51.37    2.29
  -5   2  -5   43.49    2.18
   5   2   5   51.57    2.18
  -5   2  -5   44.41    2.02
   5  -2   5   43.29    2.05
   5   2   6   68.11    1.88
  -5  -2  -6   67.77    2.94
   5   2   6   72.41    2.84
  -5   2  -6   68.31    2.77
  -5   2  -6   62.55    2.54
   5  -2   6   65.38    2.62
   5   2   7   67.12    2.74
  -5  -2  -7   59.12    2.89
   5   2   7   70.06    2.81
  -5   2  -7   58.49    2.67
   5   2   7   60.29    2.73
  -5   2  -7   61.23    2.49
   5  -2   7   58.22    2.51
   5   2   7   59.70    1.67
   5  -2   7   59.19    2.75
  -5   2  -8    3.51    1.53
  -5  -2  -8    5.27    1.70
   5  -2   8    3.23    1.52
   5   2   8    3.15    1.49
   5  -2   8    4.84    1.71
   5   2   8    8.45    1.60
   5   2   8    5.21    1.65
   5  -2   8    3.93    1.42
   5   2   8    4.48    0.58
  -5   2  -9    3.59    1.58
   5  -2   9    5.82    1.76
   5   2   9    7.17    1.59
  -5  -2  -9    4.21    1.70
   5  -2   9    4.87    1.71
   5   2   9    3.48    1.58
   5  -2   9    5.21    1.49
   5   2   9    4.29    1.59
  -5   2 -10   11.48    1.78
   5  -2  10   14.32    1.86
   5   2  10   14.67    1.80
   5   2  10   13.95    1.94
   5   2  10   14.84    2.08
  -5  -2 -10   14.02    2.02
   5  -2  10   15.44    1.72
   5  -2  11    7.50    1.56
  -5  -2 -11    9.52    1.93
   5  -2  11    8.89    1.94
   5   2  11    8.15    1.64
   5   2  11   11.44    1.92
  -5   2 -11    8.28    1.73
   5   2  12    5.45    1.62
   5  -2  12    6.45    2.10
   5   2  12    4.43    1.82
   5  -2  12    8.91    1.73
  -5  -2 -12    8.29    2.06
  -5   2 -12    7.18    1.74
  -5   2 -13   30.97    2.34
   5   2  13   27.04    2.12
   5   2  13   30.84    2.58
  -5  -2 -13   26.64    2.59
   5  -2  13   27.82    2.15
  -5  -3  14  100.16    3.55
   5   3 -14  101.75    4.30
   5   3 -14   93.46    3.45
  -5  -3  14  105.06    3.93
   5   3 -13   88.05    3.22
   5   3 -13   86.40    3.98
  -5  -3  13   99.23    3.72
  -5  -3  13   94.42    3.36
  -5  -3  12  225.33    6.77
  -5   3  12  226.75    5.50
  -5  -3  12  227.88    6.13
  -5   3  12  235.48    5.96
   5   3 -12  227.15    6.04
   5   3 -12  220.20    6.79
  -5  -3  12  224.88    6.41
  -5  -3  11    0.82    1.64
  -5   3  11    0.05    1.02
  -5  -3  11    0.58    1.32
   5   3 -11   -1.21    1.23
   5   3 -11    1.06    1.71
  -5  -3  11    0.18    1.37
  -5   3  11   -0.44    1.11
  -5   3  11    0.06    0.74
  -5   3  10    3.67    0.99
  -5  -3  10    3.46    1.59
  -5   3  10    2.20    0.69
   5   3 -10    3.27    1.16
   5   3 -10    4.11    1.59
  -5   3  10    2.93    0.67
  -5  -3  10    4.69    1.41
  -5   3  10    2.99    0.78
  -5   3  10    2.04    1.12
  -5  -3  10    2.88    1.49
  -5   3   9  704.44   15.03
  -5   3   9  707.40   14.89
  -5  -3   9  698.34   15.84
  -5   3   9  649.95   14.81
   5   3  -9  669.00   15.20
   5   3  -9  666.07   15.95
   5  -3  -9  704.68   14.76
  -5  -3   9  680.93   15.46
  -5   3   9  665.69   14.37
  -5  -3   9  662.93   15.35
  -5   3   9  684.61   14.58
  -5  -3   8   64.44    2.89
   5   3  -8   65.38    2.46
  -5   3   8   68.82    2.08
  -5  -3   8   63.84    2.64
   5   3  -8   67.88    3.02
  -5   3   8   66.71    2.06
   5  -3  -8   71.49    2.02
  -5  -3   8   69.81    2.65
  -5   3   8   72.84    2.40
   5  -3  -8   70.04    2.56
  -5   3   7  685.85   14.40
  -5  -3   7  666.95   15.41
  -5  -3   7  665.55   15.13
   5   3  -7  666.61   15.59
   5  -3  -7  673.70   14.39
  -5   3   7  684.26   14.82
  -5  -3   7  632.91   15.07
   5   3  -7  668.76   14.96
  -5   3   7  669.59   14.60
   5  -3  -7  683.91   14.92
   5   3  -7  677.42   14.29
  -5  -3   6  304.01    7.58
   5   3  -6  288.91    7.66
   5  -3  -6  297.08    7.08
   5   3  -6  302.88    6.73
   5  -3  -6  295.15    6.55
  -5  -3   6  297.16    7.29
   5   3  -6  303.31    7.20
  -5  -3   6  299.24    7.33
  -5   3   6  308.92    6.94
  -5  -3   5  299.07    7.30
   5   3  -5  288.30    7.40
   5   3  -5  295.11    6.65
   5  -3  -5  276.88    6.27
  -5  -3   5  285.45    7.01
  -5  -3   5  301.34    6.93
  -5   3   5  297.97    6.77
   5   3  -5  293.70    6.97
   5  -3  -5  292.12    6.80
  -5  -3   5  301.39    7.11
  -5  -3   4  822.62   18.18
  -5  -3   4  860.18   18.02
   5  -3  -4  795.79   17.27
   5   3  -4  839.61   17.76
   5   3  -4  816.12   17.96
  -5   3   4  836.34   17.80
  -5  -3   4  839.91   18.01
  -5  -3   3  633.87   14.33
   5  -3  -3  623.27   13.55
   5   3  -3  662.86   14.11
  -5  -3   3  670.69   14.17
   5   3  -3  637.82   14.21
  -5  -3   3  639.30   14.26
  -5   3   3  636.46   14.06
   5  -3  -2  171.73    3.94
   5  -3  -2  176.71    3.96
   5   3  -2  176.36    4.50
  -5  -3   2  176.13    4.66
   5   3  -2  169.32    4.54
  -5   3   2  164.82    4.40
   5  -3  -2  159.83    4.21
  -5  -3   1  754.84   16.31
  -5   3   1  709.36   15.52
   5  -3  -1  731.72   15.63
   5   3  -1  730.39   16.13
   5  -3  -1  742.12   15.82
  -5   3   1  726.95   15.98
   5  -3  -1  729.82   15.63
   5  -3   0  434.89    9.56
  -5  -3   0  420.91   10.08
  -5   3   0  419.90    9.44
   5  -3   0  441.54    9.57
  -5   3   0  417.96    9.79
   5  -3   0  428.85    9.57
  -5  -3   0  434.85    9.49
   5  -3   0  418.66    9.95
   5   3   0  419.94   10.03
   5  -3   1   92.34    2.76
  -5  -3  -1   93.15    3.24
  -5   3  -1   91.01    2.67
   5  -3   1   96.42    2.81
   5   3   1   95.35    3.11
   5  -3   1   93.07    3.05
  -5  -3  -1   93.40    2.51
  -5   3  -1   92.32    2.93
  -5   3  -2   18.91    1.46
   5   3   2   17.37    1.55
   5  -3   2   21.25    1.32
  -5  -3  -2   19.63    1.69
  -5   3  -2   18.65    1.27
   5  -3   2   18.97    1.37
   5  -3   2   22.35    1.54
  -5  -3  -2   20.56    0.97
   5  -3   3  112.71    3.54
  -5  -3  -3  123.71    3.92
  -5   3  -3  120.65    3.49
   5  -3   3  124.62    3.69
   5   3   3  120.82    3.74
   5  -3   3  117.92    3.65
  -5   3  -3  107.58    3.50
  -5  -3  -3  125.62    2.97
   5  -3   4    5.02    1.29
   5   3   4    6.24    1.35
  -5   3  -4    5.78    1.12
   5  -3   4    5.82    1.23
  -5   3  -5   30.04    1.84
   5  -3   5   28.71    1.97
   5   3   5   32.54    2.00
   5  -3   5   30.26    1.84
   5   3   6   25.90    1.93
  -5  -3  -6   22.57    2.09
  -5   3  -6   21.68    1.80
   5  -3   6   24.45    1.81
   5  -3   7    5.10    1.43
   5   3   7    6.40    1.41
  -5   3  -7    5.06    1.33
   5   3   7    6.50    1.47
  -5  -3  -7    5.78    1.78
   5   3   7    7.97    1.62
  -5   3  -7    5.07    1.51
  -5   3  -8   13.03    1.75
   5  -3   8   16.87    1.99
   5   3   8   15.99    1.80
   5   3   8   18.21    1.91
   5   3   8   17.42    1.88
   5  -3   8   14.41    1.71
  -5  -3  -8   14.94    2.08
   5  -3   9   72.95    3.37
   5   3   9   80.68    3.23
   5   3   9   81.23    3.27
   5   3   9   76.73    3.37
  -5   3  -9   74.04    3.12
  -5   3  -9   64.47    3.01
   5  -3   9   66.77    3.02
  -5  -3  -9   78.86    3.52
  -5   3 -10   18.16    1.97
   5  -3  10   18.60    1.92
   5  -3  10   18.16    2.16
   5   3  10   20.14    1.98
   5   3  10   22.01    2.02
  -5  -3 -10   16.88    2.22
   5   3  10   24.50    2.29
   5  -3  11    8.75    2.08
  -5   3 -11   10.90    1.73
   5   3  11    9.29    1.72
   5   3  11    9.29    1.88
  -5  -3 -11    7.81    2.04
   5  -3  11    7.73    1.64
  -5  -3 -12    2.32    1.96
   5  -3  12    1.06    1.94
   5   3  12    1.69    1.62
  -5   3 -12    1.97    1.64
   5   3  12    2.84    1.81
   5  -3  12    0.87    1.59
   5   4 -13    5.44    1.99
   5   4 -13    6.40    1.58
  -5  -4  13    3.26    1.72
  -5  -4  13    3.56    1.63
  -5  -4  12   -1.05    1.54
   5   4 -12   -0.52    1.32
  -5  -4  12    1.79    1.52
  -5   4  11   16.21    1.22
  -5  -4  11   20.21    2.08
  -5   4  11   15.79    1.11
  -5   4  11   18.12    0.97
   5   4 -11   16.91    1.63
   5   4 -11   18.24    2.20
  -5  -4  11   15.59    1.87
  -5   4  11   19.04    1.02
  -5  -4  11   16.79    1.82
  -5   4  10   46.80    1.65
  -5  -4  10   45.91    2.69
   5   4 -10   46.20    2.25
  -5   4  10   38.71    1.75
   5   4 -10   42.80    2.74
  -5   4  10   41.50    1.32
  -5  -4  10   41.75    2.36
  -5   4  10   46.25    1.61
  -5   4  10   38.57    1.33
  -5  -4  10   45.29    2.37
  -5  -4   9  558.58   12.38
   5   4  -9  563.68   11.73
   5   4  -9  567.36   12.59
  -5   4   9  581.22   10.91
  -5  -4   9  576.92   12.11
  -5   4   9  580.09   11.11
  -5  -4   9  578.97   11.96
   5  -4  -9  570.73   11.59
   5   4  -8  350.34    8.43
   5   4  -8  342.59    7.50
  -5  -4   8  343.36    8.89
   5   4  -8  347.93    9.09
  -5  -4   8  359.08    8.72
  -5   4   8  360.14    8.00
  -5   4   8  345.55    7.52
   5  -4  -8  351.21    8.25
  -5  -4   8  338.89    8.57
   5   4  -7    5.25    1.22
  -5  -4   7    5.40    1.48
   5   4  -7    7.58    1.60
   5   4  -7    5.03    0.82
  -5  -4   7    5.24    1.33
  -5   4   7    4.74    1.05
  -5  -4   7    5.23    1.46
   5  -4  -7    6.33    1.11
  -5  -4   6    7.62    1.48
   5   4  -6    6.37    1.15
   5   4  -6   10.04    1.56
  -5  -4   6    7.75    1.46
   5   4  -6    9.26    0.95
  -5  -4   6    8.70    1.32
  -5   4   6    8.04    1.07
   5  -4  -6    8.68    1.05
  -5  -4   5   26.21    1.78
  -5  -4   5   27.44    1.66
   5   4  -5   27.20    1.38
   5  -4  -5   25.18    1.38
  -5   4   5   27.87    1.49
   5   4  -5   26.93    1.60
  -5  -4   5   25.99    1.73
  -5  -4   4  163.41    4.72
  -5  -4   4  164.32    4.58
   5   4  -4  173.85    4.38
  -5   4   4  173.81    4.43
   5   4  -4  168.71    4.61
   5  -4  -4  159.91    4.21
  -5  -4   4  169.21    4.63
  -5  -4   3  876.31   17.94
   5  -4  -3  808.06   16.91
   5   4  -3  822.58   17.82
   5   4  -3  851.10   17.65
  -5   4   3  859.56   17.64
  -5  -4   3  824.58   17.87
  -5  -4   2 1496.47   30.92
  -5   4   2 1390.59   29.95
   5  -4  -2 1413.23   29.91
   5   4  -2 1462.52   30.78
   5   4  -2 1462.11   30.65
   5  -4  -2 1434.67   30.06
  -5   4   2 1445.04   30.54
  -5   4   1  383.45    8.92
   5   4  -1  379.30    9.28
   5  -4  -1  371.65    8.67
  -5   4   1  372.80    8.47
   5  -4  -1  386.63    8.48
   5   4  -1  394.36    9.18
   5  -4  -1  387.74    8.62
  -5  -4   1  403.94    9.34
   5   4   0   47.71    2.16
   5  -4   0   48.32    1.78
  -5  -4   0   51.11    1.76
  -5   4   0   46.52    1.69
   5  -4   0   45.85    1.70
  -5  -4   0   46.73    2.33
  -5   4   0   49.13    2.03
   5  -4   1  865.88   18.45
   5   4   1  862.08   18.83
  -5   4  -1  830.73   18.29
   5  -4   1  848.91   18.39
  -5  -4  -1  801.84   18.91
   5   4   1  829.42   18.74
  -5   4  -1  832.39   18.54
  -5  -4  -1  863.88   18.11
   5  -4   2  112.01    3.48
  -5  -4  -2  122.99    3.02
  -5   4  -2  121.07    3.42
   5  -4   2  120.21    3.52
   5  -4   2  114.44    3.71
  -5  -4  -2  118.84    3.95
   5   4   2  123.20    3.80
  -5   4  -2  116.95    3.56
  -5   4  -3  596.75   13.50
   5  -4   3  599.53   13.69
   5  -4   3  605.00   13.64
   5  -4   3  589.83   13.79
   5   4   3  605.28   13.85
  -5  -4  -3  588.67   14.02
  -5  -4  -3  602.81   12.85
  -5   4  -4   38.24    1.99
   5  -4   4   42.46    2.20
   5  -4   4   39.00    2.06
  -5  -4  -4   44.80    1.34
   5   4   4   43.18    2.29
   5  -4   4   39.04    2.20
  -5   4  -5   17.68    1.69
  -5   4  -5   22.31    1.64
   5  -4   5   19.53    1.81
   5  -4   5   20.85    1.77
   5   4   5   21.11    1.84
  -5  -4  -6   11.96    1.91
   5  -4   6   14.00    1.87
  -5   4  -6   13.96    1.68
  -5   4  -6   11.35    1.58
   5  -4   6   14.14    1.66
   5   4   6   11.75    1.71
  -5   4  -7 1235.50   27.38
   5  -4   7 1186.03   27.83
  -5   4  -7 1270.45   27.51
   5   4   7 1327.03   27.71
  -5  -4  -7 1280.05   28.03
   5  -4   7 1223.85   27.55
   5   4   8  268.83    7.15
  -5   4  -8  256.61    7.03
   5   4   8  258.35    7.10
   5  -4   8  242.91    7.06
  -5  -4  -8  255.21    7.47
  -5   4  -9   32.09    2.17
  -5   4  -9   31.68    2.22
  -5  -4  -9   27.93    2.56
   5   4   9   29.36    2.32
   5  -4   9   32.27    2.29
   5  -4   9   33.81    2.44
  -5  -4 -10   18.00    2.28
  -5   4 -10   17.62    1.98
   5  -4  10   17.50    2.09
   5   4  10   20.70    2.18
   5   4  10   17.43    2.03
  -5   4 -11    1.45    1.59
   5  -4  11   -1.16    1.86
  -5  -4 -11    0.54    1.93
   5   4  11    0.48    1.71
   5   4  11    1.75    1.71
   5  -4  12  105.11    4.57
   5   4  12  110.98    4.03
   5   4  12  102.82    4.33
  -5   4 -12  113.23    4.00
   5   5 -13   65.41    2.93
  -5  -5  13   68.61    3.11
   5   5 -13   66.24    3.56
  -5  -5  13   64.51    3.27
  -5  -5  12   16.44    2.01
   5   5 -12   14.04    1.77
   5   5 -12   13.16    2.20
  -5  -5  12   10.52    1.81
   5   5 -11   98.19    3.56
   5   5 -11  101.06    4.24
  -5  -5  11  100.25    3.87
  -5   5  11   96.50    2.98
  -5   5  11  105.35    2.85
  -5  -5  11  106.70    3.74
  -5   5  11   92.20    2.53
  -5   5  10   62.79    1.68
  -5  -5  10   70.42    3.32
   5   5 -10   67.09    2.76
   5   5 -10   68.69    3.40
  -5   5  10   64.22    2.46
  -5   5  10   56.37    1.67
  -5  -5  10   63.71    3.01
  -5   5  10   64.40    2.22
  -5  -5  10   66.72    2.92
   5  -5 -10   64.04    2.55
   5   5  -9   57.20    2.49
   5   5  -9   48.61    1.34
  -5  -5   9   55.05    2.95
   5   5  -9   53.94    2.94
  -5  -5   9   54.10    2.67
  -5   5   9   56.48    2.08
   5  -5  -9   54.69    2.20
  -5  -5   9   53.74    2.63
  -5  -5   8  170.27    5.45
   5   5  -8  166.58    5.61
   5   5  -8  169.88    5.01
   5   5  -8  178.50    4.23
  -5  -5   8  180.86    5.31
  -5   5   8  180.90    4.69
   5  -5  -8  182.38    4.69
  -5  -5   8  173.30    5.18
   5   5  -7   13.30    1.50
  -5  -5   7    9.07    1.71
   5   5  -7   15.07    1.91
   5   5  -7   14.72    1.14
  -5  -5   7   13.45    1.72
  -5  -5   7   11.63    1.66
  -5   5   7   14.07    1.37
   5  -5  -7   13.86    1.30
   5   5  -6  307.82    7.66
  -5  -5   6  312.05    7.84
  -5   5   6  320.03    7.45
   5   5  -6  305.86    7.16
   5  -5  -6  300.69    7.16
  -5  -5   6  296.50    7.72
  -5  -5   6  296.26    7.91
  -5  -5   5    0.28    1.24
   5   5  -5    0.21    0.97
  -5  -5   5    0.06    1.17
  -5   5   5   -0.34    1.10
   5  -5  -5    0.35    0.91
   5   5  -5   -0.06    1.16
  -5  -5   5   -0.24    1.32
  -5  -5   4    0.97    1.16
  -5   5   4    2.74    0.45
   5   5  -4    1.73    1.00
  -5   5   4    1.30    1.08
   5   5  -4    1.65    1.17
   5  -5  -4    1.45    0.91
  -5  -5   4    1.91    1.28
  -5  -5   3   10.92    1.41
  -5   5   3   10.03    0.69
   5   5  -3    9.56    1.47
  -5  -5   3   11.13    1.53
   5   5  -3   10.89    1.28
  -5   5   3    8.56    1.26
   5  -5  -3    9.25    0.70
   5   5  -3   11.45    1.40
   5   5  -2  200.34    5.59
  -5   5   2  183.22    4.56
   5  -5  -2  196.51    4.38
   5   5  -2  203.25    5.43
   5  -5  -2  194.63    4.68
  -5   5   2  195.73    5.17
  -5  -5   2  210.26    5.60
   5   5  -2  192.42    5.22
  -5  -5   2  199.66    5.31
   5   5  -1  139.89    4.20
  -5   5   1  126.52    3.37
   5  -5  -1  129.15    3.28
  -5  -5   1  140.83    4.30
   5   5  -1  126.53    4.02
  -5   5   1  139.11    3.90
   5   5  -1  130.88    3.97
  -5  -5   1  127.45    3.68
   5  -5  -1  130.96    3.52
   5   5   0   58.51    2.51
  -5   5   0   53.76    1.93
  -5  -5   0   51.26    2.64
   5  -5   0   57.12    1.92
  -5   5   0   54.77    2.24
   5  -5   0   57.25    2.07
  -5  -5   0   56.94    2.05
   5  -5   1   -0.15    0.91
  -5   5  -1    0.68    1.08
  -5   5  -1   -0.33    0.84
   5  -5   1    1.11    0.87
   5   5   1    0.92    1.16
  -5  -5  -1    0.93    1.45
  -5  -5  -1    1.44    0.78
   5   5   2    0.33    1.27
   5  -5   2    0.66    1.03
  -5   5  -2   -1.56    1.21
   5   5   2   -1.01    1.26
   5  -5   2   -0.46    0.98
  -5   5  -2    0.61    0.98
  -5  -5  -2    1.08    0.75
  -5  -5  -2    0.41    1.48
  -5  -5  -3   36.74    2.45
  -5   5  -3   36.54    1.87
   5  -5   3   33.98    1.92
   5   5   3   37.40    2.17
  -5  -5  -3   33.74    1.26
   5  -5   3   33.09    1.93
  -5  -5  -4 3129.45   67.10
  -5   5  -4 3235.95   66.47
   5  -5   4 3113.77   66.65
   5  -5   4 3086.05   66.64
   5   5   4 3154.89   66.74
  -5  -5  -4 3148.04   65.51
  -5   5  -5  197.17    5.53
   5  -5   5  201.10    5.77
  -5   5  -5  199.99    5.57
   5  -5   5  205.19    5.86
   5   5   5  203.79    5.85
  -5  -5  -6 1174.73   26.43
  -5   5  -6 1146.80   25.63
   5  -5   6 1143.93   26.13
  -5   5  -6 1202.39   25.82
   5   5   6 1191.23   26.01
  -5  -5  -7    6.44    2.02
   5  -5   7    4.87    1.63
  -5   5  -7    7.77    1.68
   5   5   7    7.07    1.79
  -5   5  -8  116.24    4.00
   5  -5   8  123.04    4.55
  -5  -5  -8  122.35    4.70
  -5   5  -8  111.94    4.14
   5   5   8  127.46    4.28
  -5  -5  -9   14.11    2.30
   5   5   9   11.87    1.71
   5   5   9   11.07    1.79
  -5   5  -9   13.47    1.80
   5   5   9   12.57    1.90
   5  -5  10   27.22    2.58
  -5   5 -10   30.16    2.17
   5   5  10   28.67    2.24
  -5  -5 -10   25.51    2.62
   5   5  10   24.98    2.29
   5  -5  11    3.05    2.05
   5   5  11    1.86    1.82
   5   5  11   -0.93    1.74
  -5   5 -11    2.77    1.66
   5   5  12   51.68    2.90
   5   5  12   50.45    3.04
  -5   5 -12   52.22    2.84
  -5  -6  13    1.71    1.76
   5   6 -13   -0.13    1.89
  -5  -6  13    1.65    1.78
   5   6 -12   28.79    2.16
   5   6 -12   25.89    2.62
  -5  -6  12   28.07    2.46
  -5  -6  12   27.46    2.30
   5   6 -11   11.51    1.73
   5   6 -11   12.28    2.15
  -5   6  11   12.18    1.38
  -5  -6  11   13.63    1.99
  -5  -6  11   12.92    1.96
  -5   6  10   35.01    1.16
   5   6 -10   33.47    2.18
   5   6 -10   38.26    2.80
  -5  -6  10   35.78    2.49
  -5   6  10   33.43    1.81
  -5   6  10   35.09    2.07
  -5  -6  10   42.20    2.49
   5  -6 -10   34.38    1.90
   5   6  -9  206.60    5.66
  -5   6   9  183.13    4.32
  -5  -6   9  190.61    6.07
   5   6  -9  195.35    6.32
   5   6  -9  205.84    4.66
  -5   6   9  208.46    5.27
  -5  -6   9  198.58    5.95
   5  -6  -9  204.74    5.15
  -5  -6   9  193.48    5.72
   5   6  -8  258.76    6.62
   5  -6  -8  266.42    6.05
  -5   6   8  219.89    5.22
  -5   6   8  237.34    5.26
   5   6  -8  248.48    7.24
  -5  -6   8  253.81    7.04
  -5   6   8  279.73    6.35
  -5  -6   8  252.13    6.87
   5   6  -8  256.33    5.79
  -5  -6   8  255.45    6.71
  -5   6   7    2.99    0.46
   5   6  -7    4.51    1.39
   5   6  -7    4.34    1.05
  -5   6   7    4.41    0.46
  -5  -6   7    5.29    1.68
  -5  -6   7    3.63    1.55
  -5   6   7    3.06    1.33
  -5  -6   7    2.54    1.54
   5  -6  -7    3.45    1.07
  -5  -6   6  992.93   22.22
   5   6  -6  963.30   21.39
  -5  -6   6 1023.53   22.18
   5  -6  -6  980.20   21.25
  -5   6   6 1037.63   21.73
   5   6  -6  983.72   21.93
  -5   6   6  976.34   20.70
  -5   6   5  181.11    4.16
  -5  -6   5  189.17    5.48
  -5  -6   5  180.63    5.36
  -5   6   5  191.14    5.10
   5   6  -5  179.33    4.88
   5   6  -5  182.36    5.27
   5  -6  -5  180.70    4.62
  -5  -6   4   78.15    3.13
   5   6  -4   87.22    3.48
  -5   6   4   87.68    3.03
   5   6  -4   84.02    3.15
  -5   6   4   80.15    2.21
   5  -6  -4   86.62    2.64
   5   6  -4   86.89    2.97
  -5  -6   3   31.59    2.05
   5   6  -3   33.32    1.97
  -5   6   3   35.00    1.32
   5   6  -3   35.23    2.27
   5  -6  -3   33.35    1.36
  -5   6   3   39.99    2.05
   5   6  -3   32.14    2.03
   5  -6  -3   32.67    1.61
   5   6  -2 1292.05   28.09
   5   6  -2 1279.46   28.39
   5  -6  -2 1274.91   26.97
   5  -6  -2 1314.30   27.51
  -5   6   2 1304.45   28.00
   5   6  -2 1306.49   28.26
  -5  -6   2 1277.70   27.90
  -5   6   2 1284.76   27.36
  -5  -6   2 1304.30   28.10
   5   6  -1 1078.25   23.63
  -5  -6   1 1078.69   23.27
  -5   6   1 1051.73   22.93
   5  -6  -1 1057.04   22.73
   5   6  -1 1055.79   23.80
  -5   6   1 1090.63   23.44
   5  -6  -1 1087.95   23.12
   5   6   0    2.32    1.26
  -5   6   0    0.83    0.90
   5  -6   0    1.88    0.85
  -5  -6   0    2.61    1.50
   5  -6   0    0.25    0.96
  -5   6   0    0.76    1.19
  -5  -6   0    1.81    1.10
   5   6   1   15.60    1.68
   5  -6   1   16.75    1.24
   5  -6   1   16.54    1.46
  -5   6  -1   15.66    1.29
  -5  -6  -1   19.68    1.32
  -5  -6  -1   15.96    1.88
  -5   6  -1   17.47    1.59
  -5   6  -2   14.57    1.54
   5   6   2   13.70    1.61
   5  -6   2   11.27    1.26
  -5   6  -2   10.35    1.29
   5   6   2   11.69    1.66
  -5  -6  -2   12.92    2.02
  -5  -6  -2   12.74    1.07
   5  -6   2   13.64    1.43
   5   6   3  343.19    8.41
  -5   6  -3  320.82    7.99
   5  -6   3  311.76    8.08
  -5   6  -3  332.01    8.01
  -5  -6  -3  323.97    8.79
   5   6   3  332.85    8.45
  -5  -6  -3  324.36    7.34
   5  -6   3  329.25    8.24
   5  -6   4    4.08    1.50
   5   6   4    4.52    1.59
   5  -6   4    4.25    1.45
  -5   6  -4    4.30    1.35
  -5   6  -4    1.95    1.23
  -5  -6  -4    6.50    0.73
  -5   6  -5   31.12    2.09
  -5   6  -5   33.66    2.06
   5  -6   5   32.73    2.20
  -5   6  -5   31.81    2.08
   5   6   5   33.87    2.32
  -5  -6  -5   34.46    1.10
   5  -6   5   33.77    2.24
   5  -6   6   14.11    1.85
   5   6   6   17.31    2.02
  -5   6  -6   13.96    1.77
   5  -6   6   18.29    2.05
  -5   6  -6   19.03    1.90
  -5   6  -6   19.58    1.89
  -5  -6  -6   18.91    2.40
  -5   6  -7  578.26   13.72
   5  -6   7  597.91   14.38
  -5   6  -7  581.91   13.97
   5   6   7  595.95   14.13
  -5  -6  -7  606.00   14.70
   5   6   8    2.38    1.74
  -5  -6  -8    3.24    2.06
   5  -6   8    0.32    1.84
  -5   6  -8   -0.08    1.51
   5   6   8    1.36    1.40
   5   6   9   22.52    2.23
  -5  -6  -9   13.44    2.41
  -5   6  -9   16.30    1.95
   5   6   9   18.82    1.89
   5   6   9   17.27    1.89
   5  -6  10   18.96    2.41
   5   6  10   19.92    2.06
   5   6  10   15.71    2.10
   5   6  11   42.68    2.74
   5   6  11   37.78    2.65
  -5   6 -11   41.71    2.55
   5  -6  11   47.77    3.17
   5   7 -12  114.13    4.99
  -5  -7  12  124.35    4.81
  -5  -7  12  122.80    4.49
  -5  -7  11   16.10    2.15
   5   7 -11   18.78    2.00
   5   7 -11   14.89    2.47
   5  -7 -11   20.42    1.69
  -5  -7  11   16.24    2.22
  -5   7  11   18.67    1.72
   5   7 -10   48.03    2.60
   5   7 -10   42.22    3.09
   5   7 -10   49.33    1.68
   5   7 -10   48.77    1.56
  -5   7  10   44.25    2.25
  -5  -7  10   46.30    2.90
  -5   7  10   48.70    2.64
   5  -7 -10   44.78    2.09
  -5  -7  10   47.22    2.77
   5   7  -9   -0.24    1.43
   5   7  -9    1.36    0.96
  -5   7   9   -0.16    0.61
   5   7  -9   -0.35    1.90
  -5  -7   9   -1.27    1.59
  -5   7   9    0.25    1.36
  -5  -7   9   -1.76    1.64
  -5   7   9    0.98    0.66
   5  -7  -9    1.15    1.16
  -5  -7   8   35.94    2.58
   5   7  -8   36.84    1.77
  -5   7   8   35.06    1.22
  -5   7   8   36.42    1.30
  -5   7   8   38.17    2.18
  -5  -7   8   40.76    2.68
   5  -7  -8   36.62    1.79
   5   7  -8   43.87    2.39
   5  -7  -7  139.11    3.82
  -5  -7   7  136.26    4.80
   5   7  -7  135.01    3.97
  -5   7   7  149.55    4.41
  -5  -7   7  148.66    4.83
  -5   7   7  137.49    3.40
   5   7  -7  146.41    4.59
   5   7  -6  318.15    8.23
  -5  -7   6  324.16    8.49
   5   7  -6  317.05    7.80
  -5   7   6  311.82    7.11
  -5  -7   6  321.85    8.44
  -5   7   6  338.25    8.13
   5  -7  -6  312.47    7.47
  -5  -7   5   11.41    1.71
  -5   7   5   11.34    0.90
   5   7  -5   12.97    1.90
  -5  -7   5   13.73    1.88
  -5   7   5   16.26    1.77
   5  -7  -5   10.90    1.22
   5   7  -5    9.32    1.43
   5   7  -5   12.94    1.70
  -5  -7   4    3.41    1.56
  -5   7   4    5.78    0.85
   5   7  -4    7.60    1.68
  -5   7   4    6.73    1.50
   5  -7  -4    6.79    1.13
   5   7  -4    7.03    1.54
   5   7  -4    6.74    1.43
  -5   7   3   49.62    1.81
  -5  -7   3   53.23    2.59
   5   7  -3   45.09    2.67
   5   7  -3   54.04    2.53
  -5   7   3   52.56    2.51
   5   7  -3   54.43    2.66
   5  -7  -3   49.67    2.03
   5  -7  -2   40.18    1.21
  -5   7   2   42.46    1.71
   5   7  -2   39.97    2.48
   5   7  -2   39.53    2.27
   5  -7  -2   41.52    1.80
  -5   7   2   40.60    2.27
   5   7  -2   42.98    2.46
  -5  -7   2   40.11    2.24
   5   7  -1  391.53   10.17
  -5   7   1  399.59    9.26
   5  -7  -1  408.69    8.98
   5   7  -1  401.95    9.96
  -5   7   1  408.79    9.83
   5  -7  -1  396.35    9.44
   5   7   0    7.82    1.64
  -5   7   0    6.74    1.54
   5  -7   0    5.96    0.97
  -5   7   0    6.19    1.09
   5  -7   0    6.36    1.28
  -5  -7   0    6.29    1.29
   5   7   1    0.57    1.51
  -5  -7  -1    0.78    1.81
   5  -7   1    1.74    1.04
  -5   7  -1    0.16    1.08
  -5   7  -1    0.39    0.94
   5  -7   1    2.13    1.24
  -5   7  -1    3.05    1.40
  -5  -7  -1    0.37    1.13
   5   7   2  151.39    5.00
   5   7   2  158.12    5.00
  -5   7  -2  157.24    4.54
   5  -7   2  155.36    4.52
  -5  -7  -2  165.33    5.45
  -5   7  -2  161.59    4.45
   5   7   2  162.81    5.06
   5  -7   2  159.89    4.82
  -5   7  -2  163.65    4.74
  -5  -7  -2  162.95    4.22
  -5  -7  -3    1.05    2.00
   5  -7   3    0.20    1.30
  -5   7  -3   -0.87    1.27
   5  -7   3   -0.53    1.37
  -5   7  -3    0.30    1.18
   5   7   3   -1.10    1.61
   5   7   3   -0.08    1.44
  -5  -7  -3   -0.55    0.89
   5   7   4   49.74    2.63
   5   7   4   44.48    2.67
  -5  -7  -4   46.07    3.06
  -5   7  -4   46.19    2.38
   5  -7   4   48.81    2.48
   5  -7   4   52.73    2.62
  -5   7  -4   52.31    2.48
  -5   7  -4   48.34    2.43
  -5  -7  -4   47.93    1.60
   5   7   5    2.14    1.56
  -5   7  -5    0.46    1.42
   5  -7   5   -0.08    1.41
   5   7   5    0.88    1.63
  -5   7  -5    0.93    1.44
  -5   7  -5   -0.60    1.36
   5  -7   5    1.66    1.49
  -5  -7  -5    0.48    0.58
  -5  -7  -6   46.74    3.24
   5  -7   6   48.19    2.76
  -5   7  -6   42.49    2.55
  -5   7  -6   46.66    2.62
   5   7   6   46.78    2.78
   5  -7   6   47.22    2.75
  -5   7  -6   49.09    2.51
  -5   7  -7   29.02    2.16
   5  -7   7   26.82    2.36
   5   7   7   25.55    2.32
  -5   7  -7   28.57    2.28
   5  -7   7   26.44    2.30
  -5  -7  -7   27.13    2.83
  -5   7  -7   29.47    2.27
  -5   7  -8  134.25    4.41
   5  -7   8  130.30    4.87
  -5  -7  -8  144.47    5.39
  -5   7  -8  135.05    4.76
   5   7   8  130.61    4.73
  -5   7  -9    1.19    1.56
   5   7   9    2.87    1.89
   5   7   9    3.00    1.56
   5   7  10    8.23    1.75
  -5   7 -10    4.91    1.83
   5   7  10    7.78    2.01
   5   7  11    2.51    1.80
   5   7  11    2.41    1.93
   5   8 -11   10.66    0.82
   5  -8 -11   11.92    1.51
   5   8 -11    7.97    2.28
  -5  -8  11   12.77    2.18
   5   8 -11    8.91    1.00
  -5   8  11   13.03    1.82
  -5  -8  11   10.57    2.11
   5   8 -10  225.04    7.63
   5   8 -10  241.19    5.86
  -5   8  10  263.76    6.72
  -5  -8  10  258.69    7.53
   5   8 -10  251.60    5.99
  -5   8  10  252.39    7.19
   5  -8 -10  241.17    6.18
   5   8  -9   29.45    2.25
   5  -8  -9   33.18    1.75
  -5   8   9   28.76    1.22
  -5   8   9   34.68    2.20
  -5  -8   9   29.97    2.57
   5   8  -9   30.44    1.72
   5   8  -8   31.52    1.85
  -5   8   8   30.52    1.23
  -5   8   8   35.05    2.28
  -5   8   8   34.78    1.38
  -5  -8   8   31.78    2.58
   5  -8  -8   31.15    1.69
   5   8  -8   33.83    2.31
  -5  -8   7   39.10    2.71
   5   8  -7   38.09    2.12
   5   8  -7   43.50    3.02
  -5   8   7   42.65    2.48
  -5  -8   7   40.26    2.76
   5  -8  -7   44.44    1.93
   5   8  -7   46.10    2.58
  -5   8   7   43.57    1.63
  -5  -8   6  213.06    6.36
   5   8  -6  211.68    5.79
   5   8  -6  217.93    6.66
  -5  -8   6  225.59    6.46
  -5   8   6  219.95    6.06
   5  -8  -6  205.46    5.29
   5   8  -6  215.06    6.18
  -5   8   6  204.30    5.10
  -5  -8   5   39.68    2.58
  -5   8   5   39.20    1.66
   5   8  -5   42.34    2.79
   5  -8  -5   40.22    1.88
   5   8  -5   43.58    2.36
   5   8  -5   43.39    2.58
  -5  -8   5   37.33    2.59
  -5   8   5   42.02    2.43
  -5  -8   4   15.14    1.86
  -5   8   4   15.68    1.17
   5   8  -4   14.02    1.82
   5   8  -4   15.68    2.08
  -5   8   4   16.43    1.86
   5  -8  -4   15.24    1.41
   5   8  -4   17.25    1.85
  -5  -8   3    0.92    1.43
  -5   8   3    0.82    0.90
   5   8  -3    0.87    1.53
   5   8  -3    1.36    1.63
  -5   8   3   -0.60    1.54
   5   8  -3    0.52    1.61
   5  -8  -2    0.69    0.54
   5   8  -2   -0.91    1.59
  -5   8   2   -0.49    0.98
   5   8  -2    1.42    1.59
   5  -8  -2   -0.16    1.07
  -5   8   2   -1.11    1.57
  -5   8   1   70.38    2.52
   5   8  -1   69.97    3.19
   5  -8  -1   73.23    2.20
   5   8  -1   67.14    3.15
  -5   8   1   72.93    3.06
   5  -8  -1   75.23    2.78
   5   8   0  335.80    8.93
  -5   8   0  335.50    8.19
   5  -8   0  338.12    7.95
  -5   8   0  339.02    7.87
  -5   8   0  350.53    8.65
   5  -8   0  337.90    8.44
   5   8   1   69.97    3.24
  -5   8  -1   72.08    2.71
   5  -8   1   70.81    2.58
  -5   8  -1   68.69    2.47
   5   8   1   67.75    3.29
  -5   8  -1   73.75    3.03
   5  -8   1   69.32    2.93
  -5  -8  -1   68.43    2.64
   5   8   2  197.32    6.05
  -5   8  -2  203.16    5.53
   5  -8   2  193.57    5.43
   5   8   2  192.44    5.97
  -5   8  -2  194.65    5.35
   5   8   2  206.49    6.11
  -5   8  -2  203.41    5.69
   5  -8   2  202.68    5.82
  -5  -8  -2  202.11    5.17
   5   8   3  137.63    4.65
   5   8   3  131.32    4.67
  -5   8  -3  137.48    4.26
   5  -8   3  134.68    4.23
   5  -8   3  135.47    4.57
  -5   8  -3  135.66    4.17
   5   8   3  137.98    4.80
  -5  -8  -3  130.79    3.64
  -5   8  -4    4.27    1.55
   5   8   4    3.07    1.55
   5  -8   4    2.81    1.56
   5  -8   4    2.60    1.43
  -5   8  -4    2.67    1.45
  -5   8  -4    3.86    1.47
   5   8   4    1.13    1.69
  -5  -8  -4    2.85    0.87
  -5  -8  -5  128.89    3.14
   5  -8   5  131.92    4.66
   5   8   5  142.13    4.61
  -5   8  -5  132.96    4.39
   5  -8   5  120.85    4.36
  -5   8  -5  128.34    4.35
  -5   8  -5  128.60    4.26
   5   8   5  125.68    4.61
   5  -8   6    1.02    1.67
   5   8   6    0.63    1.55
  -5   8  -6   -0.79    1.54
   5  -8   6    0.09    1.54
   5   8   6    0.29    1.75
  -5   8  -6   -0.81    1.58
  -5   8  -6    0.17    1.57
  -5  -8  -6    0.42    0.48
   5  -8   7  164.85    5.57
  -5   8  -7  167.84    5.42
   5  -8   7  162.28    5.61
   5   8   7  170.28    5.53
  -5   8  -7  166.99    5.12
   5   8   7  171.24    5.42
   5  -8   8    5.78    2.05
   5   8   8    6.21    1.96
  -5   8  -8    3.34    1.74
  -5   8  -8    4.18    1.79
   5   8   9    8.56    2.12
  -5   8  -9    8.27    2.06
   5   8  10    5.54    1.63
   5   8  10    2.76    1.96
  -5   9  10   14.13    2.32
   5   9 -10   14.26    1.47
  -5  -9  10   14.32    2.35
   5  -9 -10   14.69    1.49
   5  -9  -9    1.12    1.17
  -5   9   9    4.04    2.35
  -5  -9   9    0.93    1.93
   5   9  -9    2.56    1.31
  -5   9   9    2.31    1.68
   5  -9  -8   63.99    2.37
   5   9  -8   70.20    2.78
   5   9  -8   68.30    3.76
  -5  -9   8   68.40    3.55
   5   9  -7  299.80    7.64
   5   9  -7  300.71    8.71
  -5   9   7  298.64    6.96
  -5  -9   7  295.35    8.37
   5  -9  -7  285.94    7.06
   5   9  -7  292.61    8.08
   5   9  -6    9.37    1.85
  -5   9   6    6.68    1.11
   5   9  -6   11.59    1.78
   5   9  -6    8.00    2.09
  -5  -9   6    7.29    1.93
   5  -9  -6    8.45    1.24
  -5  -9   5 1356.77   31.40
   5   9  -5 1425.08   31.92
   5   9  -5 1420.28   31.19
  -5   9   5 1466.86   31.33
   5  -9  -5 1418.87   30.43
   5   9  -5 1425.94   31.50
  -5   9   5 1424.09   30.35
  -5  -9   4   38.85    2.57
   5   9  -4   43.86    2.91
   5   9  -4   42.81    2.64
  -5   9   4   44.77    2.65
   5  -9  -4   40.71    2.05
   5   9  -4   45.56    2.76
  -5   9   4   43.91    1.92
  -5   9   3  546.68   12.51
   5   9  -3  549.19   13.69
   5   9  -3  555.66   13.39
  -5   9   3  559.90   13.31
   5   9  -3  556.62   13.56
   5  -9  -2   21.83    0.96
  -5   9   2   22.62    1.58
   5   9  -2   21.82    2.29
   5   9  -2   19.75    2.19
   5  -9  -2   24.97    1.74
  -5   9   2   23.08    2.16
   5  -9  -1    4.39    0.86
   5   9  -1    5.70    1.84
  -5   9   1    6.15    1.24
   5   9  -1    5.14    1.89
  -5   9   1    3.11    0.86
   5  -9  -1    3.97    1.32
  -5   9   1    3.80    1.66
   5  -9   0   18.62    1.33
   5   9   0   18.40    2.12
   5   9   0   13.89    2.17
  -5   9   0   19.64    1.62
  -5   9   0   20.16    2.06
  -5   9   0   17.09    1.32
   5  -9   0   13.94    1.66
   5   9   1   60.71    3.19
  -5   9  -1   59.61    2.62
   5  -9   1   63.37    2.46
  -5   9  -1   61.02    2.39
   5   9   1   64.84    3.18
  -5   9  -1   57.84    2.86
   5  -9   1   63.79    2.85
   5   9   2   27.70    2.34
  -5   9  -2   30.21    2.03
   5  -9   2   27.36    1.85
  -5   9  -2   28.92    1.88
   5   9   2   32.00    2.44
   5  -9   2   29.93    2.23
  -5  -9  -2   35.85    1.89
   5   9   2   25.43    2.40
   5   9   3   23.96    2.30
   5  -9   3   23.79    1.83
  -5   9  -3   22.30    1.82
   5   9   3   24.98    2.32
   5   9   3   22.20    2.28
   5  -9   3   21.90    2.19
  -5  -9  -3   22.46    1.53
   5   9   4   69.48    3.35
   5   9   4   74.40    3.55
   5  -9   4   75.56    3.15
  -5   9  -4   68.41    3.07
  -5   9  -4   79.56    3.17
   5   9   4   76.37    3.60
  -5   9  -4   75.59    3.13
   5  -9   4   72.02    3.45
  -5  -9  -4   73.86    2.34
   5   9   5   61.46    3.09
   5  -9   5   58.06    2.97
  -5   9  -5   60.29    2.95
  -5   9  -5   65.19    2.98
   5   9   5   61.28    3.35
   5  -9   5   62.68    3.26
  -5   9  -5   63.83    2.93
  -5  -9  -5   61.37    1.86
   5   9   5   64.38    3.35
   5   9   6   32.52    2.42
  -5   9  -6   31.24    2.35
   5  -9   6   29.07    2.35
  -5   9  -6   35.41    2.43
  -5  -9  -6   31.13    1.05
   5  -9   6   34.55    2.72
  -5   9  -6   31.06    2.25
   5   9   6   33.82    2.68
   5   9   7   43.47    2.75
   5  -9   7   42.46    2.96
  -5   9  -7   40.17    2.72
   5   9   7   36.93    2.77
   5   9   8   -0.40    1.78
   5   9   8   -0.64    1.86
  -5   9  -8   -1.66    1.89
   5  -9   8    0.50    1.87
   5   9   9   42.59    2.80
  -5   9  -9   45.47    3.00
   5   9   9   41.27    2.94
   5  -9   9   37.43    3.07
   5  10  -9   22.90    2.86
  -5  10   9   25.24    3.11
  -5 -10   9   23.49    2.58
   5  10  -9   23.71    1.94
   5 -10  -9   21.20    1.55
   5 -10  -8   66.71    2.43
   5  10  -8   70.71    2.98
   5  10  -8   72.72    3.95
  -5 -10   8   69.62    3.72
   5  10  -7   51.54    3.39
   5  10  -7   50.71    2.70
  -5 -10   7   48.26    3.15
   5 -10  -7   50.09    2.10
   5  10  -6   43.45    3.03
   5  10  -6   40.28    2.61
  -5 -10   6   45.35    3.04
   5 -10  -6   44.69    2.05
  -5  10   6   48.70    2.02
   5 -10  -5  338.35    8.04
   5  10  -5  335.38    9.11
   5  10  -5  336.27    9.49
   5  10  -5  332.90    8.85
  -5  10   5  324.74    7.99
  -5  10   4   15.37    1.45
   5  10  -4   20.28    2.30
   5  10  -4   17.81    2.18
  -5  10   4   16.33    2.08
   5 -10  -4   16.29    1.58
   5  10  -4   19.80    2.18
  -5  10   3   52.37    2.30
   5  10  -3   56.80    3.28
   5  10  -3   50.66    3.04
  -5  10   3   51.90    2.92
  -5  10   2   -0.18    1.20
   5  10  -2   -1.00    1.66
   5  10  -2    2.24    1.88
   5 -10  -2    0.99    1.23
  -5  10   2    1.08    1.70
   5 -10  -1    1.53    0.83
  -5  10   1   -0.93    1.27
   5  10  -1    2.93    1.78
   5  10  -1    1.15    1.89
  -5  10   1    1.27    0.88
   5 -10  -1   -0.22    1.40
  -5  10   1    3.19    1.75
  -5  10   0  556.34   13.12
   5 -10   0  564.31   12.72
   5  10   0  562.61   13.98
   5  10   0  565.53   13.99
  -5  10   0  545.80   12.66
   5 -10   0  576.22   13.49
  -5  10   0  587.04   13.66
   5  10   0  576.10   14.00
   5  10   1   82.83    3.74
  -5  10  -1   85.30    3.26
   5 -10   1   86.24    3.03
  -5  10  -1   89.31    3.01
   5  10   1   98.53    4.01
  -5  10  -1   76.46    3.49
   5 -10   1   91.72    3.62
   5 -10   2    3.66    1.63
   5  10   2    3.86    1.88
   5 -10   2    6.00    1.38
  -5  10  -2    2.88    1.50
  -5  10  -2    5.40    1.43
   5  10   2    4.79    1.93
   5  10   3  160.96    5.50
   5  10   3  158.55    5.58
  -5  10  -3  163.23    5.09
   5 -10   3  168.71    5.01
  -5 -10  -3  167.98    4.52
  -5  10  -3  159.46    4.94
   5 -10   3  170.10    5.54
   5  10   4    2.28    1.76
   5 -10   4    3.37    1.53
  -5  10  -4    4.98    1.58
   5 -10   4    3.74    1.82
  -5  10  -4    1.84    1.55
   5  10   4    3.23    2.06
  -5 -10  -4    4.61    1.09
   5  10   5    2.40    1.83
   5 -10   5    1.08    1.66
  -5  10  -5    4.28    1.66
   5  10   5    2.56    2.00
   5 -10   5    0.68    1.82
  -5 -10  -5    2.80    0.88
   5  10   6   41.60    2.76
   5 -10   6   36.63    2.60
  -5 -10  -6   34.85    1.19
   5 -10   6   39.93    2.89
  -5  10  -6   35.77    2.56
   5  10   6   31.48    2.73
   5  10   7   72.48    3.48
  -5  10  -7   67.85    3.45
   5 -10   7   71.69    3.68
   5  10   7   63.37    3.52
   5  10   8   13.72    2.18
   5 -10   8   15.58    2.37
   5  10   8   22.56    2.52
  -5  10  -8   17.25    2.27
   5  11  -8  386.38    9.59
   5  11  -8  363.09   10.67
  -5 -11   8  371.09   10.48
   5 -11  -8  369.68    8.75
   5  11  -7   48.71    3.40
   5  11  -7   42.14    2.73
  -5 -11   7   44.07    3.17
   5 -11  -7   46.04    2.07
   5  11  -6    5.56    2.07
   5  11  -6    2.95    1.86
   5 -11  -6    2.29    1.28
   5  11  -5  137.98    5.31
   5  11  -5  122.85    4.71
   5 -11  -5  138.95    4.06
  -5  11   5  132.73    4.00
  -5  11   4    2.63    1.24
   5  11  -4    1.01    1.99
   5  11  -4   -0.41    1.89
  -5  11   3   35.18    2.05
   5  11  -3   35.38    2.88
   5  11  -3   32.86    2.76
  -5  11   2   32.62    1.98
   5  11  -2   32.14    2.70
   5  11  -2   32.64    2.78
   5 -11  -1   14.58    1.13
  -5  11   1   15.05    1.64
   5  11  -1   13.14    2.17
   5  11  -1   14.24    2.40
  -5  11   1   12.81    1.18
   5 -11  -1   12.84    1.76
   5 -11   0  144.09    4.07
  -5  11   0  149.67    4.61
   5  11   0  150.15    5.31
   5  11   0  143.34    5.33
  -5  11   0  143.71    4.09
   5 -11   0  147.91    4.88
   5 -11   1    0.76    1.17
   5  11   1    2.60    1.83
  -5  11  -1    2.73    1.49
  -5  11  -1    0.52    1.23
   5 -11   1   -0.29    1.65
   5  11   2   16.56    2.27
   5 -11   2   16.78    1.64
  -5  11  -2   13.99    1.81
  -5  11  -2   18.79    1.72
   5 -11   2   17.05    2.13
   5  11   3    0.56    1.79
   5 -11   3    1.00    1.41
  -5  11  -3    1.01    1.52
  -5  11  -3    2.28    1.50
   5 -11   3   -0.97    1.75
   5  11   3    1.76    2.05
  -5 -11  -3   -0.32    1.30
   5  11   4   68.34    3.53
   5  11   4   61.76    3.60
   5 -11   4   64.44    3.05
  -5  11  -4   66.82    3.05
   5 -11   4   64.94    3.47
  -5 -11  -4   62.35    2.35
   5  11   5   32.81    2.63
   5 -11   5   28.78    2.27
  -5 -11  -5   29.74    1.45
  -5  11  -5   29.45    2.35
   5  11   5   29.52    2.84
   5 -11   5   27.49    2.63
   5  11   6    1.11    1.84
  -5  11  -6    2.26    1.78
   5  11   6    2.88    2.05
   5 -11   6    1.64    1.88
  -5 -11  -6    1.40    0.72
   5  11   7    3.45    1.90
   5  11   7    9.89    2.21
  -5  11  -7    5.67    1.95
   5 -11   7    4.36    2.17
   5  12  -6  126.49    5.43
   5  12  -6  136.70    4.95
   5  12  -5   23.40    2.72
   5  12  -5   26.05    2.62
   5  12  -4   26.01    2.79
   5  12  -4   23.29    2.53
  -5  12   3    4.65    1.44
   5  12  -3    0.91    2.02
   5  12  -3    1.98    2.01
  -5  12   2   21.35    1.91
   5  12  -2   17.11    2.37
   5  12  -2   19.55    2.46
   5 -12  -1    0.91    0.86
  -5  12   1   -0.68    1.40
   5  12  -1    1.36    1.93
   5  12  -1   -0.86    2.09
   5 -12  -1    0.52    1.50
   5 -12   0   53.33    2.17
  -5  12   0   53.01    2.68
   5  12   0   53.62    3.32
   5  12   0   57.31    3.49
  -5  12   0   52.79    2.22
   5 -12   1   23.48    1.70
   5  12   1   24.04    2.54
  -5  12  -1   21.51    2.06
  -5  12  -1   23.74    1.77
   5 -12   1   23.87    2.31
   5 -12   2   57.87    2.67
   5  12   2   58.63    3.42
  -5  12  -2   58.90    2.67
   5 -12   2   55.24    3.26
   5  12   3   27.78    2.56
   5 -12   3   25.12    2.09
  -5  12  -3   21.03    2.03
   5  12   3   25.70    2.71
   5 -12   3   27.89    2.62
  -5 -12  -3   23.20    1.80
   5  12   4   10.17    2.17
   5 -12   4    8.98    2.19
   5 -12   4   10.97    1.84
  -5  12  -4   12.13    1.91
   5  12   4   10.33    2.35
  -5 -12  -4   12.15    1.43
   5 -12   5    3.07    2.06
   5  12   5    4.58    1.96
  -5  12  -5    2.66    1.73
   5  12   5   -1.29    2.22
  -5 -12  -5    1.35    1.04
   5  13  -4  376.77   10.64
   5  13  -4  365.23   10.26
   5  13  -3   72.60    3.96
   5  13  -3   71.87    3.90
   5  13  -2    2.43    2.07
   5  13  -2    0.64    2.24
   5  13  -1   10.96    2.39
   5  13  -1   10.92    2.54
   5 -13   0   31.30    1.77
   5  13   0   32.60    2.88
   5  13   0   31.21    3.05
   5 -13   0   35.59    2.60
   5 -13   1  161.62    4.67
   5  13   1  159.31    5.89
   5  13   1  158.20    6.02
   5 -13   1  161.01    5.56
   5 -13   2   10.88    1.59
   5  13   2   10.10    2.24
   5 -13   2   10.42    2.19
  -5 -13  -3    3.11    1.46
   5 -13   3    3.48    1.57
   5  13   3    3.91    2.00
  -5  13  -3    1.63    1.63
   5 -13   3    3.69    2.13
   6   0 -14    9.32    1.71
  -6   0  14    6.02    1.44
   6   0 -13   -0.87    1.43
  -6   0  13   -0.37    1.27
  -6   0  12   23.82    1.98
   6   0 -12   25.69    2.06
  -6   0  12   25.44    1.52
  -6   0  12   24.10    1.71
  -6   0  11    0.83    1.25
   6   0 -11   -0.07    1.29
  -6   0  11    0.71    0.91
  -6   0  11    0.41    1.20
  -6   0  10   25.12    1.82
   6   0 -10   24.09    1.84
  -6   0  10   24.41    1.31
  -6   0  10   23.00    1.64
  -6   0   9    0.69    1.24
   6   0  -9   -1.07    1.24
   6   0  -9   -0.48    0.61
  -6   0   9    0.55    0.76
  -6   0   9    0.28    1.17
  -6   0   8 2175.29   44.53
  -6   0   8 2003.32   43.68
   6   0  -8 2113.40   44.65
   6   0  -8 2144.49   43.72
  -6   0   8 2130.06   44.32
  -6   0   7    0.51    1.01
   6   0  -7    0.05    1.12
   6   0  -7    0.25    0.53
  -6   0   7    0.51    0.76
  -6   0   7   -0.08    1.08
  -6   0   6  728.41   16.13
  -6   0   6  734.16   16.11
   6   0  -6  746.45   15.54
   6   0  -6  720.79   16.29
   6   0  -6  740.90   15.89
  -6   0   6  717.17   15.86
  -6   0   5    0.31    0.82
  -6   0   5   -0.69    0.83
   6   0  -5   -0.05    0.45
   6   0  -5    1.15    0.88
   6   0  -5    0.13    0.81
  -6   0   5   -0.27    0.95
  -6   0   4    0.61    0.89
   6   0  -4   -0.44    0.88
   6   0  -4    0.05    1.05
   6   0  -4    0.17    0.50
  -6   0   4    0.33    0.86
   6   0  -4   -0.17    0.79
  -6   0   3    0.42    0.85
   6   0  -3    1.04    0.89
   6   0  -3    0.68    0.82
   6   0  -3    0.10    0.56
  -6   0   3    0.58    0.93
   6   0  -3    0.17    0.95
   6   0  -2 4729.69   99.28
  -6   0   2 4779.39   99.33
  -6   0   2 4768.32   99.10
   6   0  -2 4750.29   99.24
   6   0  -2 4735.38   99.18
   6   0  -1    0.02    0.58
  -6   0   1   -0.57    1.03
   6   0  -1    0.34    0.88
  -6   0   0   18.59    1.48
   6   0   0   18.36    1.07
   6   0   0   19.60    1.18
   6   0   1    0.10    1.01
   6   0   1    0.08    0.79
  -6   0  -1    0.65    1.15
   6   0   1   -0.36    0.76
   6   0   2  260.11    6.65
   6   0   2  273.74    6.52
  -6   0  -2  270.27    6.81
   6   0   2  263.49    6.15
  -6   0  -3    0.06    1.20
   6   0   3   -0.82    1.15
   6   0   3    0.10    0.97
   6   0   3    0.11    0.72
   6   0   4   42.40    2.20
   6   0   4   51.65    1.70
   6   0   5   -0.60    1.24
   6   0   5    0.91    0.77
   6   0   6  581.61   12.37
   6   0   6  534.45   13.26
  -6   0  -6  568.03   13.39
   6   0   6  568.23   13.17
   6   0   7    0.52    1.44
  -6   0  -7    0.16    1.60
   6   0   7   -0.16    1.47
   6   0   7   -0.75    0.78
   6   0   8  699.04   16.78
   6   0   8  722.82   16.99
   6   0   8  716.48   16.49
   6   0   8  726.29   15.50
  -6   0  -8  740.07   16.80
   6   0   9    2.38    1.57
   6   0   9   -0.27    1.50
   6   0   9   -0.68    1.73
  -6   0  -9   -0.77    1.74
   6   0   9    0.41    0.76
  -6   0 -10  769.89   17.17
   6   0  10  715.03   17.18
   6   0  10  726.34   16.68
   6   0  10  720.21   15.50
  -6   0 -11    0.47    1.84
   6   0  11    0.66    1.53
   6   0  11    0.53    1.76
   6   0  12    3.47    1.59
   6   0  12   -0.45    1.93
  -6  -1  13    9.06    1.83
  -6  -1  13    7.83    1.51
  -6   1  13    9.61    1.45
   6   1 -13   11.11    1.89
   6  -1 -13   11.26    1.58
  -6   1  12    3.51    1.35
  -6  -1  12    4.10    1.49
  -6  -1  12    3.71    1.30
   6   1 -12    2.04    1.52
   6  -1 -12    4.76    1.35
   6   1 -12    3.35    0.90
  -6  -1  12    2.48    1.15
  -6   1  12    3.69    1.29
  -6   1  11    7.47    1.37
  -6  -1  11    6.56    1.56
   6   1 -11    5.31    1.55
   6  -1 -11    7.02    1.36
   6   1 -11    6.88    0.99
  -6   1  11    6.49    0.88
  -6  -1  11    5.82    1.18
  -6   1  11    8.07    1.38
  -6  -1  11    5.27    1.36
  -6   1  10  215.60    5.65
  -6  -1  10  220.84    5.99
   6   1 -10  217.55    6.09
   6   1 -10  216.19    5.17
   6  -1 -10  213.13    5.67
  -6  -1  10  217.53    5.60
  -6   1  10  210.05    5.48
  -6   1  10  204.24    4.91
  -6  -1  10  213.50    5.41
  -6   1   9    7.00    1.19
  -6  -1   9    5.95    1.41
   6   1  -9    3.91    1.40
   6  -1  -9    7.12    1.25
   6   1  -9    7.25    0.91
  -6  -1   9    5.83    1.05
  -6   1   9    6.47    1.23
  -6   1   9    3.89    0.45
  -6  -1   9    4.76    1.27
  -6   1   8    3.81    0.77
  -6   1   8    1.93    1.06
  -6  -1   8    3.39    1.28
   6   1  -8    2.76    1.38
   6   1  -8    4.33    0.87
   6  -1  -8    2.21    1.12
  -6  -1   8    3.86    0.93
  -6   1   8    2.26    1.17
  -6  -1   8    4.82    1.24
  -6   1   7  297.65    7.00
  -6  -1   7  303.86    7.38
   6   1  -7  297.19    6.74
   6   1  -7  293.24    7.50
   6  -1  -7  299.97    7.15
  -6   1   7  289.74    6.74
  -6  -1   7  293.40    6.72
  -6   1   7  300.00    7.09
  -6  -1   7  295.03    7.15
   6  -1  -7  296.67    7.42
  -6   1   6  152.14    3.92
   6   1  -6  152.71    3.75
  -6  -1   6  155.40    4.27
  -6  -1   6  153.63    3.88
   6   1  -6  147.20    4.35
   6  -1  -6  159.68    4.11
  -6   1   6  145.50    3.85
   6   1  -6  153.57    3.76
  -6  -1   6  151.61    4.11
  -6   1   6  148.96    4.03
   6   1  -5    3.03    0.67
   6   1  -5    3.34    0.80
   6   1  -5    3.06    0.99
   6  -1  -5    3.15    0.81
  -6  -1   5    1.95    0.86
  -6  -1   5    3.57    0.98
  -6   1   5    2.17    0.94
  -6  -1   5    2.60    1.00
  -6   1   4   31.69    1.50
   6   1  -4   29.19    1.63
   6  -1  -4   28.84    1.38
   6  -1  -4   33.73    1.60
  -6   1   4   29.17    1.48
   6  -1  -4   29.01    1.49
   6   1  -4   28.91    1.77
   6   1  -4   29.05    1.26
  -6  -1   4   30.63    1.48
  -6  -1   4   32.99    1.52
   6   1  -4   31.36    1.40
   6   1  -3  364.14    8.26
   6  -1  -3  348.17    8.19
   6   1  -3  361.02    8.52
  -6   1   3  371.34    8.28
  -6   1   3  369.23    8.34
   6  -1  -3  347.69    7.71
   6  -1  -3  364.60    7.78
   6   1  -3  359.37    8.13
   6  -1  -3  355.38    8.32
  -6  -1   3  361.85    8.38
  -6  -1   3  359.36    8.21
   6  -1  -3  354.18    8.26
   6   1  -3  352.66    8.44
   6  -1  -2   28.46    1.37
   6   1  -2   28.67    1.64
   6   1  -2   30.24    1.57
  -6   1   2   30.90    1.64
   6  -1  -2   31.58    1.13
   6   1  -2   32.57    1.63
  -6  -1   2   34.08    1.68
   6  -1  -2   31.54    1.59
  -6   1   2   32.06    1.49
  -6  -1   2   31.34    1.46
   6  -1  -2   29.49    1.45
   6   1  -1  956.04   20.71
  -6   1   1  932.70   20.62
   6  -1  -1  938.53   20.20
  -6  -1   1  965.16   20.74
   6  -1  -1  949.43   20.36
   6   1  -1  954.80   20.48
  -6   1   0  169.83    4.59
   6  -1   0  167.95    4.21
  -6  -1   0  171.97    4.68
   6  -1   0  167.32    4.21
   6   1   0  170.34    4.29
  -6   1  -1  389.01    9.49
   6  -1   1  402.63    9.24
  -6  -1  -1  411.44    9.65
  -6  -1  -1  401.04    9.06
   6  -1   1  414.13    9.10
   6   1   1  406.35    9.10
   6  -1   1  411.17    9.49
   6  -1   2   99.76    3.03
  -6   1  -2   94.39    3.19
   6   1   2   97.78    2.93
   6  -1   2  101.76    2.75
   6  -1   2   95.82    3.15
  -6  -1  -2   98.91    3.32
   6   1   2   99.55    2.73
   6  -1   3  203.43    5.32
  -6   1  -3  203.38    5.47
   6  -1   3  200.39    5.32
  -6  -1  -3  200.30    5.57
   6  -1   3  202.81    4.87
   6   1   3  201.53    4.82
   6  -1   3  203.72    5.39
   6   1   4   64.13    2.57
   6  -1   4   56.43    2.47
   6  -1   4   62.76    1.99
   6   1   4   60.80    1.89
   6  -1   4   58.51    2.49
   6   1   5   39.23    2.11
   6  -1   5   36.87    2.05
   6  -1   5   35.62    1.53
   6   1   5   35.70    1.38
   6   1   6  141.89    4.29
   6   1   6  132.61    4.31
  -6   1  -6  128.60    4.32
   6  -1   6  134.87    3.53
   6   1   6  136.75    3.35
   6  -1   6  129.51    4.16
  -6  -1  -6  131.60    4.43
   6  -1   7   17.53    1.74
  -6   1  -7   22.60    2.02
   6  -1   7   19.80    1.22
   6   1   7   21.44    1.91
   6   1   7   19.78    1.90
   6   1   7   19.03    1.85
  -6  -1  -7   19.91    2.01
   6   1   7   19.83    1.03
   6   1   8   53.40    2.63
  -6  -1  -8   52.71    2.86
   6  -1   8   50.89    2.82
   6   1   8   53.25    2.79
   6  -1   8   49.50    2.78
   6   1   8   53.51    2.79
  -6   1  -8   54.79    2.75
   6  -1   8   54.95    1.89
   6  -1   8   49.95    2.52
   6   1   8   53.02    1.63
  -6  -1  -9   68.01    3.30
   6  -1   9   74.29    3.40
   6   1   9   73.31    3.25
   6  -1   9   72.83    3.47
   6   1   9   73.68    3.46
  -6   1  -9   72.24    3.20
   6  -1   9   72.99    2.22
   6  -1   9   69.75    3.03
   6   1   9   69.76    1.94
   6   1   9   74.09    3.09
   6  -1  10   26.85    2.10
   6   1  10   25.78    1.02
   6   1  10   26.67    2.11
  -6  -1 -10   32.36    2.50
   6  -1  10   28.41    2.43
   6   1  10   27.96    2.37
  -6   1 -10   29.80    2.36
   6  -1  10   30.86    1.38
  -6   1 -11   36.72    2.62
   6  -1  11   40.02    2.77
   6   1  11   38.66    2.68
  -6  -1 -11   41.40    2.85
   6  -1  11   39.47    2.40
   6   1  11   39.83    2.46
   6   1  12   15.38    1.89
   6  -1  12   13.98    2.20
   6   1  12   12.19    2.21
   6  -1  12   11.68    1.77
  -6  -2  13   11.49    2.01
  -6   2  13    9.80    1.49
   6   2 -13   15.57    2.11
   6  -2 -13   14.68    1.45
  -6  -2  13   16.02    1.69
  -6   2  12   39.51    2.09
  -6  -2  12   40.42    2.58
   6   2 -12   38.33    2.56
   6   2 -12   37.99    1.84
   6  -2 -12   40.89    1.96
  -6  -2  12   40.18    2.15
  -6  -2  12   36.60    2.12
  -6   2  11   20.75    1.54
  -6  -2  11   18.91    1.70
   6   2 -11   19.72    1.41
  -6  -2  11   21.74    2.03
   6   2 -11   19.89    2.03
   6  -2 -11   22.69    1.51
  -6  -2  11   21.02    1.63
  -6   2  11   18.76    1.59
  -6   2  10  144.37    3.89
  -6  -2  10  136.19    4.45
   6   2 -10  129.41    3.73
   6   2 -10  132.24    4.56
   6  -2 -10  130.92    3.82
  -6  -2  10  135.84    4.01
  -6   2  10  138.68    3.98
  -6  -2  10  138.63    4.09
  -6   2   9    1.75    0.97
  -6  -2   9    1.29    1.37
   6   2  -9    1.38    0.96
   6   2  -9    2.73    1.51
   6  -2  -9    0.34    0.98
  -6  -2   9    2.95    1.11
  -6   2   9    1.28    0.70
  -6   2   9    1.37    1.21
  -6  -2   9    2.58    1.29
  -6   2   8  447.87    9.86
  -6  -2   8  434.06   10.55
   6   2  -8  439.68    9.93
  -6   2   8  434.67    9.67
   6   2  -8  423.94   10.70
   6  -2  -8  441.69    9.94
  -6  -2   8  427.68   10.22
  -6  -2   8  435.25   10.11
  -6   2   8  461.86   10.16
   6  -2  -8  430.01   10.37
  -6   2   7  995.29   20.94
   6   2  -7  977.86   21.09
  -6  -2   7  992.36   21.69
  -6   2   7  973.03   20.95
   6   2  -7  957.81   21.82
   6  -2  -7  978.98   21.05
  -6  -2   7  968.15   20.94
  -6  -2   7 1000.25   21.23
   6   2  -7  963.39   20.72
  -6  -2   7  990.32   21.40
   6  -2  -7  979.52   21.48
  -6   2   7 1000.39   21.27
  -6  -2   6 1502.44   31.60
  -6   2   6 1446.57   31.02
   6   2  -6 1431.27   31.73
   6  -2  -6 1478.55   31.02
  -6  -2   6 1475.37   31.35
  -6   2   6 1494.60   31.25
   6   2  -6 1432.16   30.86
   6  -2  -6 1438.34   31.35
   6   2  -6 1484.16   31.12
  -6  -2   6 1474.27   31.11
   6   2  -5   20.32    1.17
  -6  -2   5   15.59    1.42
  -6   2   5   19.51    1.27
   6  -2  -5   17.82    1.04
   6   2  -5   18.46    1.54
  -6  -2   5   18.82    1.31
   6   2  -5   18.81    1.18
  -6  -2   5   19.33    1.37
  -6   2   5   21.90    1.37
  -6  -2   4    2.39    0.99
  -6  -2   4    3.93    0.99
   6   2  -4    0.41    1.01
   6  -2  -4    0.91    0.64
  -6   2   4   -0.46    0.91
   6   2  -4    2.37    0.86
   6   2  -4    0.91    0.76
  -6   2   4    1.72    0.90
  -6  -2   4    0.28    0.94
   6  -2  -3   95.85    2.60
   6   2  -3   97.01    3.16
  -6  -2   3   92.04    2.98
  -6   2   3   94.19    2.86
   6   2  -3   97.42    2.86
  -6  -2   3   93.21    2.81
   6  -2  -3   92.72    2.16
   6  -2  -3   90.74    2.98
   6   2  -3   94.04    2.83
   6  -2  -3   96.13    2.78
   6  -2  -2  204.95    4.83
  -6  -2   2  204.81    5.28
   6   2  -2  204.18    5.37
  -6   2   2  198.44    5.12
   6  -2  -2  199.75    4.58
   6   2  -2  192.59    5.11
   6  -2  -2  193.95    4.90
   6   2  -2  209.71    5.14
   6  -2  -2  203.97    5.26
   6   2  -2  195.56    5.19
  -6   2   1   45.67    1.96
   6  -2  -1   44.50    1.53
   6   2  -1   50.33    2.04
   6  -2  -1   45.36    1.74
   6   2  -1   46.58    1.94
  -6  -2   1   45.98    2.12
   6  -2   0    3.32    0.77
  -6   2   0    1.36    1.04
  -6  -2   0    2.22    1.16
   6   2   0    1.47    0.92
   6  -2   0    0.13    0.79
  -6  -2   0    0.21    0.75
  -6  -2  -1   26.42    1.81
  -6   2  -1   28.17    1.70
   6   2   1   29.05    1.45
   6  -2   1   30.24    1.44
   6  -2   1   29.86    1.68
   6  -2   1   31.87    1.41
  -6  -2  -1   27.69    1.26
  -6   2  -2  209.84    5.63
   6  -2   2  221.00    5.49
   6   2   2  212.10    5.20
   6   2   2  215.98    5.69
   6  -2   2  209.69    5.45
   6  -2   2  208.79    5.61
  -6  -2  -2  221.55    5.09
   6  -2   2  215.22    5.22
  -6  -2  -2  214.10    5.83
   6  -2   3  140.91    4.03
   6   2   3  142.85    4.19
  -6   2  -3  132.11    4.09
   6  -2   3  139.80    4.04
   6  -2   3  131.76    4.05
   6  -2   3  141.39    3.63
   6   2   3  135.71    3.56
  -6  -2  -3  135.20    4.30
   6  -2   4    1.59    1.22
   6  -2   4    2.13    1.12
   6  -2   4   -0.06    1.19
   6   2   4    1.39    1.32
  -6  -2  -4    2.04    1.42
   6  -2   4    0.84    0.87
   6   2   4    2.22    0.82
   6  -2   5    4.22    1.34
   6   2   5    5.43    1.48
   6  -2   5    4.34    1.43
   6  -2   5    4.83    0.96
   6   2   5    5.07    0.87
  -6  -2  -6   38.39    2.49
   6   2   6   39.81    2.30
   6   2   6   46.39    2.37
  -6   2  -6   44.06    2.44
   6   2   6   40.83    1.52
   6  -2   6   40.51    2.21
   6   2   7  119.06    3.95
  -6  -2  -7  107.95    4.12
   6   2   7  128.30    4.12
  -6   2  -7  109.37    3.95
   6   2   7  118.62    4.04
   6  -2   7  105.24    3.78
   6   2   7  114.14    2.91
   6   2   8  198.62    5.47
  -6  -2  -8  184.32    5.78
   6   2   8  198.20    5.65
   6   2   8  183.46    5.61
  -6   2  -8  177.89    5.45
   6  -2   8  175.58    5.32
   6   2   8  176.37    4.20
  -6   2  -9   26.53    2.25
   6  -2   9   29.73    2.47
  -6  -2  -9   28.90    2.49
   6   2   9   30.87    2.21
   6   2   9   30.40    2.40
   6   2   9   26.34    2.24
   6  -2   9   21.41    1.98
   6  -2  10    2.09    1.74
   6   2  10    4.14    1.66
  -6   2 -10    2.35    1.72
   6   2  10    5.60    1.79
  -6  -2 -10    1.81    1.82
   6  -2  10    1.93    1.54
   6  -2  11   37.32    2.80
  -6  -2 -11   38.05    2.80
   6   2  11   40.64    2.73
   6  -2  11   36.04    2.40
  -6   2 -11   40.91    2.59
   6   2  11   39.36    2.45
   6   2  12    4.15    1.73
   6  -2  12    4.83    2.01
   6   2  12    1.41    1.83
   6  -2  12    3.43    1.64
  -6  -3  13   39.03    2.21
   6   3 -13   32.03    1.89
   6   3 -13   35.97    2.64
  -6  -3  13   32.01    2.20
  -6  -3  12   24.28    2.31
   6   3 -12   25.40    1.70
   6   3 -12   20.00    2.22
  -6  -3  12   22.18    1.88
  -6  -3  12   19.43    1.85
  -6   3  11    9.78    1.13
  -6  -3  11   11.93    1.86
   6   3 -11   11.79    1.36
   6   3 -11    6.87    1.86
  -6  -3  11   10.86    1.54
  -6   3  11    9.39    1.39
  -6  -3  11    9.98    1.58
  -6   3  10  100.06    2.79
  -6  -3  10   98.39    3.71
  -6   3  10   88.40    2.45
  -6   3  10   98.96    3.13
   6   3 -10   96.19    3.07
   6   3 -10   95.26    3.81
   6  -3 -10  102.82    2.72
  -6   3  10   82.81    2.56
  -6  -3  10   96.70    3.33
  -6  -3  10   96.04    3.35
  -6   3   9   43.06    1.98
  -6   3   9   41.69    1.56
  -6  -3   9   40.82    2.42
  -6   3   9   45.57    1.62
   6   3  -9   41.97    1.97
   6   3  -9   43.64    2.61
   6  -3  -9   42.44    1.56
  -6  -3   9   39.92    2.13
  -6  -3   9   40.36    2.18
   6  -3  -9   44.15    2.27
  -6   3   8  258.23    5.83
  -6   3   8  256.83    6.03
  -6  -3   8  252.52    6.89
   6   3  -8  261.30    6.36
   6   3  -8  259.04    7.11
   6  -3  -8  261.91    5.87
  -6  -3   8  255.87    6.54
   6   3  -8  246.84    5.61
  -6   3   8  255.30    6.34
  -6  -3   8  266.58    6.63
   6  -3  -8  260.47    6.56
  -6  -3   7  538.87   12.52
   6   3  -7  518.00   12.68
  -6   3   7  525.76   11.75
   6  -3  -7  526.15   11.46
  -6  -3   7  525.60   12.14
  -6  -3   7  536.17   12.23
   6  -3  -7  533.38   12.10
   6   3  -7  532.26   11.49
   6   3  -7  544.05   12.03
  -6  -3   6  522.39   12.15
   6   3  -6  520.11   11.35
   6   3  -6  508.11   12.31
   6  -3  -6  508.92   11.13
  -6  -3   6  535.77   11.70
   6   3  -6  503.85   11.70
   6  -3  -6  525.57   11.74
  -6  -3   6  520.97   11.89
  -6   3   6  521.70   11.54
  -6  -3   5  227.07    6.09
  -6  -3   5  249.20    5.95
   6   3  -5  224.87    6.27
  -6  -3   5  232.79    5.92
   6   3  -5  228.97    5.61
   6  -3  -5  237.34    5.26
   6   3  -5  232.75    5.85
   6  -3  -5  225.90    5.73
  -6   3   5  232.97    5.71
  -6  -3   4  113.33    3.51
   6   3  -4  112.12    3.67
   6  -3  -4  113.46    2.77
  -6  -3   4  117.19    3.48
   6   3  -4  108.48    3.30
  -6  -3   4  104.98    3.30
  -6   3   4  111.58    3.24
   6  -3  -3  167.75    3.96
   6   3  -3  153.68    4.77
   6   3  -3  169.10    4.44
  -6  -3   3  171.11    4.66
   6   3  -3  171.24    4.54
  -6   3   3  169.00    4.42
   6  -3  -3  162.13    4.25
  -6   3   2  610.18   13.80
   6  -3  -2  618.26   13.61
  -6  -3   2  619.80   14.11
   6   3  -2  629.62   13.90
   6  -3  -2  622.17   14.06
   6   3  -2  610.00   13.93
   6  -3  -2  622.41   13.27
   6  -3  -2  616.77   13.37
  -6   3   1 1749.41   38.02
   6  -3  -1 1802.87   37.62
  -6  -3   1 1776.40   38.33
   6   3  -1 1768.06   38.14
   6  -3  -1 1828.62   37.66
   6  -3  -1 1768.44   37.76
  -6   3   0   80.51    2.87
   6  -3   0   86.70    2.56
  -6  -3   0   82.27    3.09
   6  -3   0   91.58    2.63
  -6  -3   0   88.48    2.52
   6  -3   0   86.68    2.63
  -6   3  -1   67.10    2.60
   6  -3   1   71.44    2.38
  -6  -3  -1   73.20    2.89
   6  -3   1   72.45    2.42
  -6   3  -1   72.61    2.25
   6  -3   1   72.21    2.74
   6  -3   1   75.43    2.34
  -6  -3  -1   72.01    2.16
  -6  -3  -2    8.61    1.58
   6  -3   2    8.82    1.11
  -6   3  -2    6.75    1.32
   6  -3   2    8.15    1.22
  -6   3  -2    6.74    0.99
   6   3   2    9.42    1.44
   6  -3   2    8.58    1.31
   6  -3   2    9.61    1.03
  -6  -3  -2    7.78    0.82
   6  -3   3  397.98    9.44
  -6   3  -3  373.49    9.38
  -6  -3  -3  400.01    9.83
   6   3   3  402.73    9.67
   6  -3   3  399.67    9.50
   6  -3   3  384.61    9.53
  -6  -3  -3  402.49    8.75
   6  -3   4   26.85    1.81
  -6  -3  -4   21.79    2.03
   6   3   4   23.91    1.89
   6  -3   4   26.88    1.91
  -6   3  -4   27.18    1.60
   6  -3   4   27.75    1.88
   6  -3   5   82.13    3.19
   6   3   5   89.36    3.37
   6  -3   5   90.87    3.40
  -6   3  -5   82.45    2.93
   6  -3   5   83.28    3.22
  -6   3  -6  534.72   12.94
  -6  -3  -6  536.90   13.38
   6  -3   6  538.08   13.23
  -6   3  -6  534.18   12.75
   6  -3   6  525.58   12.98
   6   3   7  533.14   11.94
  -6   3  -7  465.20   11.65
   6  -3   7  456.10   11.91
  -6  -3  -7  482.64   12.14
   6   3   7  556.14   11.96
  -6   3  -7  458.90   11.43
   6  -3   7  471.98   11.67
   6   3   8  205.89    5.80
   6   3   8  201.39    5.78
  -6   3  -8  192.39    5.68
  -6  -3  -8  181.58    5.99
   6   3   8  190.47    5.73
   6  -3   8  176.90    5.57
  -6   3  -9    2.02    1.68
   6   3   9    2.04    1.69
   6   3   9    2.32    1.61
   6  -3   9    0.24    1.55
  -6  -3  -9    1.13    1.88
  -6   3 -10   15.50    2.01
   6  -3  10   14.41    2.03
  -6  -3 -10   14.60    2.27
   6   3  10   17.68    1.98
   6   3  10   17.21    2.05
   6  -3  10   11.40    1.89
   6  -3  11   15.23    2.20
  -6   3 -11   12.37    1.94
   6   3  11   13.32    1.91
   6   3  11   11.98    2.03
   6  -3  11    9.64    1.86
   6   3  12   15.81    2.09
   6  -3  12   13.80    2.02
   6   4 -13    3.52    1.94
   6   4 -13    3.99    1.42
  -6  -4  13    5.56    1.69
  -6  -4  13    4.05    1.66
   6   4 -12   20.60    1.73
   6   4 -12   20.91    2.31
  -6  -4  12   24.87    2.08
  -6  -4  12   20.67    1.90
  -6  -4  11   29.31    2.39
   6   4 -11   29.91    1.86
   6   4 -11   34.21    2.58
  -6  -4  11   33.29    2.15
  -6  -4  11   30.42    2.08
  -6   4  10   20.70    0.98
  -6   4  10   21.09    1.27
  -6   4  10   22.27    1.48
  -6  -4  10   20.85    2.09
   6   4 -10   24.35    1.71
   6   4 -10   21.91    2.25
  -6  -4  10   22.60    1.90
  -6  -4  10   22.44    1.93
   6  -4 -10   24.61    1.88
  -6  -4   9   33.15    2.42
  -6  -4   9   36.37    2.20
   6   4  -9   35.77    1.97
   6   4  -9   38.55    2.62
  -6  -4   9   37.66    2.21
  -6   4   9   41.18    1.68
   6  -4  -9   43.74    2.17
   6   4  -8   93.37    3.09
  -6  -4   8   94.16    3.55
   6   4  -8   83.37    3.58
  -6  -4   8   83.38    3.18
  -6  -4   8   88.55    3.24
   6  -4  -8   90.25    3.08
  -6   4   8   93.68    2.76
   6   4  -8   88.46    2.34
  -6  -4   7  100.36    3.56
   6   4  -7   94.79    2.64
   6   4  -7   88.39    3.63
  -6  -4   7   91.47    3.27
  -6   4   7  100.05    2.93
   6  -4  -7   94.71    3.06
  -6  -4   7   94.37    3.31
   6   4  -7   96.88    3.15
  -6  -4   6   55.19    2.60
   6   4  -6   59.19    2.79
  -6   4   6   60.84    2.19
   6   4  -6   57.14    2.01
  -6  -4   6   61.21    2.52
   6  -4  -6   58.84    2.24
   6   4  -6   55.38    2.31
  -6  -4   5    0.33    1.24
  -6  -4   5   -0.71    1.30
  -6   4   5   -0.04    1.06
  -6  -4   5   -0.50    1.21
   6   4  -5    0.54    1.34
   6   4  -5   -0.16    1.02
   6   4  -5    0.16    1.12
   6  -4  -5    0.16    1.01
  -6  -4   4  122.21    3.85
  -6  -4   4  127.49    3.89
   6   4  -4  120.45    3.55
   6   4  -4  118.34    3.73
  -6   4   4  129.26    3.62
  -6  -4   4  127.28    3.74
  -6   4   3    8.20    1.23
   6  -4  -3    7.77    0.57
   6  -4  -3    8.86    0.60
   6   4  -3    9.23    1.27
   6  -4  -3    6.91    0.52
  -6  -4   3   10.94    1.50
   6   4  -3    8.66    1.23
   6  -4  -2   73.74    2.04
  -6   4   2   67.92    1.89
   6   4  -2   74.49    2.68
   6   4  -2   76.19    2.75
   6  -4  -2   73.01    2.07
   6  -4  -2   73.73    2.36
  -6  -4   2   67.99    2.83
  -6   4   2   80.59    2.65
  -6  -4   1   70.14    2.30
   6  -4  -1   70.41    2.12
   6   4  -1   66.59    2.64
   6   4  -1   70.89    2.67
  -6  -4   1   64.25    2.79
   6  -4  -1   66.67    2.29
  -6   4   1   71.48    2.56
   6  -4  -1   66.39    2.14
   6   4   0  505.44   11.94
   6  -4   0  514.18   11.32
  -6   4   0  496.10   11.17
   6  -4   0  497.59   11.30
  -6  -4   0  507.67   12.02
  -6  -4   0  507.29   11.21
  -6   4   0  501.85   11.60
   6  -4   0  509.50   11.33
  -6  -4  -1  397.94    8.90
   6   4   1  407.20    9.72
   6  -4   1  400.59    9.26
   6  -4   1  385.73    9.07
  -6   4  -1  397.52    9.10
   6  -4   1  406.69    9.28
  -6  -4  -1  424.97    9.96
   6  -4   1  394.93    9.69
  -6   4  -1  375.57    9.37
  -6   4  -2  300.21    7.48
   6  -4   2  299.03    7.36
  -6  -4  -2  302.83    6.83
   6  -4   2  303.97    7.43
  -6   4  -2  297.94    7.21
   6   4   2  300.71    7.70
  -6  -4  -2  297.49    7.92
   6  -4   2  296.01    7.70
  -6   4  -3   70.37    2.76
   6  -4   3   66.50    2.66
   6  -4   3   73.28    2.79
  -6   4  -3   72.00    2.59
   6   4   3   68.02    2.91
  -6  -4  -3   70.37    3.18
   6  -4   3   67.70    2.89
  -6  -4  -3   69.22    2.02
   6  -4   4   18.84    1.71
  -6   4  -4   22.20    1.63
   6  -4   4   19.37    1.78
  -6  -4  -4   19.06    2.11
  -6  -4  -4   19.90    1.01
   6  -4   4   20.99    1.89
   6   4   4   20.46    1.89
   6  -4   5  185.81    5.50
  -6   4  -5  176.91    5.31
   6  -4   5  188.68    5.55
   6   4   5  193.49    5.60
  -6   4  -5  191.93    5.27
   6  -4   5  194.37    5.57
   6  -4   6  297.45    8.00
  -6   4  -6  292.32    7.82
   6  -4   6  292.27    8.14
   6   4   6  318.41    8.09
   6  -4   6  287.43    7.95
  -6  -4  -6  303.26    8.38
  -6  -4  -7    3.95    1.87
   6  -4   7    5.14    1.79
  -6   4  -7    5.38    1.52
   6   4   7    5.18    1.51
  -6   4  -7    5.92    1.63
   6   4   7    7.77    1.79
   6  -4   7    4.14    1.69
  -6  -4  -8   72.45    3.61
   6   4   8   81.71    3.37
  -6   4  -8   67.36    3.15
   6  -4   8   67.76    3.44
   6   4   8   82.12    3.37
   6   4   8   82.62    3.28
   6  -4   8   71.64    3.23
   6   4   9  157.62    4.91
   6   4   9  149.66    4.81
  -6   4  -9  127.79    4.56
   6  -4   9  124.35    4.63
  -6  -4  -9  145.34    5.23
   6   4  10    2.56    1.76
   6   4  10    1.16    1.67
   6  -4  10    2.25    1.74
  -6  -4 -10    1.27    2.08
  -6   4 -10    2.51    1.75
  -6   4 -11    4.33    1.80
   6  -4  11    4.20    1.87
   6   4  11    3.18    1.86
   6   5 -13   40.81    2.37
   6   5 -13   33.88    2.88
  -6  -5  13   36.20    2.61
  -6  -5  13   39.74    2.45
   6   5 -12   54.29    2.64
   6   5 -12   63.32    3.47
  -6  -5  12   59.58    2.99
  -6  -5  12   58.38    2.81
   6   5 -11   26.96    1.99
   6   5 -11   25.22    2.54
  -6   5  11   24.38    1.53
  -6  -5  11   27.92    2.18
  -6  -5  11   28.47    2.16
  -6  -5  10  223.68    6.56
   6   5 -10  217.13    5.89
   6   5 -10  205.44    6.62
  -6  -5  10  220.78    6.25
  -6   5  10  215.00    5.29
  -6  -5  10  213.81    6.01
   6  -5 -10  203.13    5.73
   6   5  -9   67.62    2.70
  -6  -5   9   65.96    3.17
   6   5  -9   61.88    3.27
   6   5  -9   64.02    1.76
  -6  -5   9   65.63    2.96
  -6   5   9   64.38    2.31
  -6  -5   9   63.25    2.84
   6  -5  -9   66.85    2.63
   6   5  -8  653.67   15.00
  -6  -5   8  632.17   15.45
   6   5  -8  669.05   14.21
   6   5  -8  648.65   15.75
  -6  -5   8  661.48   15.25
  -6   5   8  654.63   14.55
   6  -5  -8  668.32   14.74
  -6  -5   8  636.50   15.09
  -6  -5   7   33.96    2.23
   6   5  -7   29.58    2.32
   6   5  -7   34.68    1.56
   6   5  -7   34.24    1.95
  -6  -5   7   33.09    2.11
  -6  -5   7   31.73    2.11
  -6   5   7   31.32    1.75
   6  -5  -7   31.58    1.75
  -6  -5   6  375.50    9.37
   6   5  -6  355.33    9.56
   6   5  -6  385.55    8.63
  -6   5   6  367.60    8.74
   6  -5  -6  368.58    8.64
   6   5  -6  357.99    9.00
  -6  -5   6  375.58    9.11
  -6  -5   5   79.25    3.19
   6   5  -5   84.82    3.06
   6   5  -5   82.58    2.77
  -6   5   5   88.12    2.90
   6  -5  -5   82.54    2.68
  -6  -5   5   90.38    3.17
  -6  -5   4  289.55    7.53
  -6  -5   4  296.31    7.60
   6   5  -4  303.67    7.26
   6   5  -4  292.57    7.49
  -6   5   4  294.87    7.24
   6  -5  -4  289.78    6.99
  -6   5   3   40.88    1.24
   6  -5  -3   39.27    1.32
  -6  -5   3   39.75    2.33
   6   5  -3   43.28    2.08
   6   5  -3   42.80    2.20
  -6   5   3   42.39    2.03
  -6  -5   3   37.47    2.18
  -6   5   2  750.05   16.59
   6  -5  -2  743.38   15.84
  -6   5   2  706.80   15.89
  -6  -5   2  773.72   17.07
   6   5  -2  757.41   16.91
   6   5  -2  749.92   16.70
   6  -5  -2  762.94   16.06
  -6  -5   2  748.43   16.48
   6   5  -1  109.21    3.91
  -6  -5   1  116.42    3.98
  -6   5   1  107.81    3.01
   6  -5  -1  110.37    3.01
   6   5  -1  115.11    3.81
   6   5  -1  113.74    3.69
  -6   5   1  106.59    3.53
   6  -5  -1  115.25    3.19
  -6  -5   1  121.32    3.36
   6  -5  -1  112.27    3.26
   6   5   0   25.85    1.94
  -6   5   0   25.06    1.37
   6  -5   0   24.35    1.35
   6   5   0   26.93    1.85
  -6  -5   0   24.34    2.10
  -6  -5   0   24.40    1.42
  -6   5   0   23.49    1.72
   6  -5   0   24.57    1.43
   6   5   1  258.56    7.08
  -6   5  -1  261.58    6.48
   6  -5   1  271.78    6.60
  -6  -5  -1  270.10    6.30
  -6   5  -1  264.84    6.81
  -6  -5  -1  271.81    7.40
   6  -5   1  274.10    6.71
   6   5   2  260.21    6.90
  -6   5  -2  257.36    6.36
   6  -5   2  250.85    6.46
   6   5   2  264.13    6.92
  -6  -5  -2  251.89    5.91
  -6  -5  -2  238.25    7.10
  -6   5  -2  255.01    6.59
   6  -5   2  252.24    6.53
  -6  -5  -3  128.70    3.33
   6  -5   3  135.40    4.15
  -6   5  -3  133.07    3.96
   6   5   3  136.98    4.41
  -6  -5  -3  133.92    4.68
  -6   5  -3  133.21    4.13
   6  -5   3  138.70    4.16
   6  -5   4 1259.11   27.78
   6  -5   4 1279.16   27.82
  -6   5  -4 1249.82   27.50
   6   5   4 1253.37   27.90
  -6  -5  -4 1265.13   26.65
  -6  -5  -4 1290.02   28.35
   6  -5   5   -0.39    1.38
  -6   5  -5   -0.07    1.55
   6  -5   5    2.52    1.58
  -6   5  -5    1.18    1.40
   6   5   5    0.57    1.64
   6  -5   6  406.34   10.33
   6  -5   6  398.83   10.38
  -6   5  -6  413.41   10.10
   6   5   6  425.65   10.37
  -6  -5  -6  397.80   10.71
   6  -5   7   -0.09    1.61
   6  -5   7    0.20    1.59
  -6   5  -7    0.07    1.65
  -6   5  -7   -0.23    1.52
   6   5   7    0.51    1.25
  -6  -5  -7   -0.66    1.97
   6   5   7   -0.60    1.70
  -6  -5  -8   75.77    3.86
  -6   5  -8   77.51    3.34
   6  -5   8   75.98    3.59
   6   5   8   84.95    3.55
  -6   5  -8   74.17    3.34
  -6  -5  -9   26.56    2.64
   6   5   9   28.55    2.28
   6   5   9   24.79    2.33
  -6   5  -9   26.05    2.23
   6   5  10   73.42    3.40
   6   5  10   66.67    3.36
  -6   5 -10   64.37    3.16
   6  -5  11   -1.26    2.03
   6   5  11   -0.09    1.84
   6   5  11    1.54    1.85
   6   6 -12   17.14    1.88
   6   6 -12   21.28    2.49
  -6  -6  12   19.86    2.20
  -6  -6  12   19.28    2.14
   6   6 -11   40.96    2.36
   6   6 -11   46.91    3.13
  -6   6  11   39.20    2.00
  -6  -6  11   43.78    2.73
  -6  -6  11   44.56    2.60
   6  -6 -11   38.12    2.24
   6   6 -10    6.63    1.51
   6   6 -10    3.63    1.94
  -6  -6  10    6.56    1.73
  -6  -6  10    7.77    1.80
   6  -6 -10    7.62    1.43
  -6   6  10    3.92    1.23
  -6  -6   9    0.48    1.67
   6   6  -9    0.36    1.32
   6   6  -9   -0.45    1.88
   6   6  -9    0.13    0.83
  -6   6   9   -0.68    1.21
   6  -6  -9    1.81    1.31
  -6  -6   9   -1.16    1.58
  -6  -6   8  169.40    5.47
   6   6  -8  172.24    5.73
   6   6  -8  172.25    4.38
  -6  -6   8  166.85    5.28
  -6   6   8  178.87    4.74
   6  -6  -8  167.05    4.64
  -6  -6   8  168.03    5.16
   6   6  -8  169.26    5.07
  -6  -6   7   65.04    3.13
   6   6  -7   60.68    3.29
   6   6  -7   64.91    2.33
  -6  -6   7   63.49    2.93
  -6   6   7   64.89    2.55
   6  -6  -7   65.08    2.40
  -6  -6   7   65.70    2.94
   6   6  -7   63.98    2.78
  -6  -6   6  281.41    7.65
   6   6  -6  279.11    7.40
   6   6  -6  277.91    6.93
  -6   6   6  290.83    7.17
   6  -6  -6  285.04    6.86
  -6  -6   6  294.18    7.49
  -6   6   5  177.05    4.89
   6   6  -5  174.45    4.77
   6   6  -5  172.05    5.13
   6  -6  -5  170.46    4.55
  -6  -6   5  170.53    5.22
  -6  -6   5  178.76    5.12
  -6  -6   4  965.89   20.60
  -6   6   4  974.55   20.28
   6   6  -4  958.12   20.59
   6   6  -4  962.34   20.23
   6  -6  -4  922.15   19.84
  -6  -6   3    4.05    1.41
   6   6  -3    3.55    1.65
   6   6  -3    5.15    1.37
  -6   6   3    4.83    0.72
   6  -6  -3    5.13    0.76
  -6  -6   3    5.50    1.71
   6   6  -3    6.18    1.49
  -6   6   3    5.01    1.36
  -6  -6   2   90.58    3.63
   6   6  -2   87.02    3.23
   6   6  -2   89.63    3.60
   6  -6  -2   87.10    2.25
  -6   6   2   83.58    2.47
   6   6  -2   89.51    3.44
   6  -6  -2   90.54    2.64
  -6   6   2   89.85    3.18
  -6  -6   2   88.72    3.07
  -6   6   1    4.15    1.34
   6  -6  -1    5.44    1.03
   6   6  -1    5.91    1.64
  -6  -6   1    4.74    1.75
   6  -6  -1    3.88    0.79
   6   6  -1    5.11    1.51
  -6   6   1    4.11    0.92
   6   6  -1    5.27    1.48
   6  -6  -1    4.45    1.10
  -6  -6   1    4.15    1.24
  -6   6   0   21.95    1.78
   6   6   0   16.23    1.88
   6  -6   0   18.66    1.25
  -6   6   0   15.87    1.28
  -6  -6   0   13.64    2.06
   6   6   0   19.61    1.97
   6  -6   0   15.79    1.41
  -6  -6   0   17.82    1.40
   6   6   1  133.05    4.49
  -6   6  -1  128.96    3.83
   6  -6   1  136.48    3.89
  -6  -6  -1  135.54    4.76
  -6   6  -1  133.02    4.18
   6  -6   1  141.27    4.11
  -6  -6  -1  139.46    3.71
   6   6   2  120.65    4.22
  -6   6  -2  122.56    3.78
   6  -6   2  128.87    3.88
  -6  -6  -2  126.31    4.61
   6   6   2  130.52    4.32
  -6  -6  -2  125.13    3.35
  -6   6  -2  127.61    4.05
   6  -6   2  123.95    3.97
   6   6   3  227.97    6.31
   6  -6   3  219.67    6.07
  -6   6  -3  217.97    5.78
   6  -6   3  215.25    5.91
  -6  -6  -3  220.19    6.63
   6   6   3  203.12    6.18
  -6  -6  -3  212.85    5.08
  -6  -6  -4  219.52    6.77
   6  -6   4  216.25    6.14
  -6   6  -4  215.91    5.93
   6   6   4  220.33    6.38
  -6  -6  -4  215.57    5.04
   6  -6   4  216.96    6.20
   6   6   4  236.28    6.41
  -6   6  -5  233.17    6.54
   6  -6   5  245.02    6.81
  -6   6  -5  239.27    6.54
   6   6   5  235.79    6.81
  -6  -6  -5  242.24    5.40
   6  -6   5  237.17    6.79
   6   6   6    1.25    1.65
   6  -6   6    2.39    1.56
  -6  -6  -6    1.48    2.03
  -6   6  -6    0.15    1.64
   6  -6   6   -0.56    1.67
  -6   6  -6    0.22    1.50
   6  -6   7   23.36    2.24
  -6  -6  -7   26.45    2.71
   6  -6   7   23.50    2.32
  -6   6  -7   25.35    2.15
  -6   6  -7   22.92    2.08
   6   6   7   25.13    2.32
  -6   6  -8   96.53    3.75
   6   6   8   96.02    3.97
   6   6   8   95.87    3.69
  -6  -6  -8  100.35    4.51
   6  -6   8  103.62    4.16
  -6   6  -9  120.44    4.34
   6   6   9  131.94    4.67
   6   6   9  126.79    4.48
   6   6  10   14.63    1.97
   6   6  10   16.51    2.25
   6   6  11   10.09    2.14
   6   7 -11   11.06    2.19
  -6  -7  11    8.40    1.91
  -6  -7  11    9.99    2.00
   6  -7 -11    9.30    1.55
   6   7 -10   16.14    1.90
   6   7 -10   15.51    2.26
   6   7 -10   15.82    1.07
  -6  -7  10   17.84    2.16
  -6   7  10   22.03    1.66
   6  -7 -10   18.89    1.70
  -6  -7  10   17.33    2.12
   6   7  -9   -0.63    1.47
   6   7  -9    1.45    1.86
   6   7  -9   -0.44    1.01
  -6  -7   9   -0.10    1.62
  -6   7   9    0.64    1.30
   6  -7  -9    0.10    1.28
  -6  -7   9    0.17    1.71
  -6  -7   8   71.77    3.46
   6   7  -8   84.75    3.88
  -6  -7   8   75.29    3.40
   6   7  -8   78.11    2.63
  -6   7   8   75.55    2.94
   6  -7  -8   75.20    2.71
  -6  -7   8   78.30    3.34
   6   7  -8   75.01    3.19
  -6  -7   7  218.84    6.61
  -6  -7   7  217.34    6.48
  -6   7   7  230.53    6.06
   6   7  -7  224.66    5.73
   6  -7  -7  225.23    5.65
  -6  -7   7  217.41    6.32
   6   7  -7  215.55    6.24
   6   7  -6    7.03    1.59
  -6  -7   6    7.81    1.82
   6  -7  -6    7.37    1.23
   6   7  -6    6.34    1.33
  -6   7   6    9.76    1.61
  -6  -7   6    6.51    1.73
  -6  -7   5   98.65    3.73
  -6   7   5   92.12    2.36
  -6   7   5  104.10    3.51
   6   7  -5  101.79    3.66
   6  -7  -5   97.98    3.02
   6   7  -5   96.32    3.31
  -6  -7   4   17.76    1.99
  -6   7   4   18.73    1.00
   6   7  -4   18.60    2.18
   6   7  -4   20.61    1.82
   6  -7  -4   18.46    1.47
   6   7  -4   19.93    2.00
  -6   7   4   20.30    1.82
  -6  -7   3   16.34    1.86
   6   7  -3   22.18    1.97
  -6   7   3   17.15    1.12
   6   7  -3   20.58    2.16
   6   7  -3   20.06    1.85
   6  -7  -3   18.82    1.19
  -6   7   3   19.82    1.83
   6  -7  -3   18.88    1.48
  -6  -7   3   23.99    1.95
   6   7  -2  286.90    8.03
   6  -7  -2  288.68    6.42
  -6   7   2  285.66    6.86
   6   7  -2  301.16    7.72
   6  -7  -2  300.40    7.06
   6   7  -2  294.15    7.86
  -6   7   2  306.10    7.61
  -6  -7   2  305.68    7.49
   6   7  -1    1.30    1.53
   6  -7  -1    0.40    0.77
  -6   7   1    1.08    0.96
   6   7  -1    0.54    1.46
   6   7  -1    1.11    1.50
   6  -7  -1    0.15    1.00
  -6  -7   1    1.26    1.83
  -6   7   1    1.07    1.46
  -6  -7   1   -0.17    1.27
   6   7   0  117.57    4.29
  -6   7   0  116.02    3.50
   6  -7   0  113.65    3.37
  -6  -7   0  117.07    4.52
  -6   7   0  120.23    3.92
   6  -7   0  126.57    3.76
  -6  -7   0  121.00    3.63
   6   7   0  118.44    4.16
   6   7   1  189.14    5.96
  -6  -7  -1  207.43    6.34
   6  -7   1  210.30    5.62
  -6   7  -1  201.04    5.29
   6  -7   1  195.96    5.23
  -6   7  -1  192.44    5.56
  -6  -7  -1  196.31    5.10
   6   7   2  228.95    6.54
   6   7   2  218.76    6.39
  -6   7  -2  224.47    5.85
   6  -7   2  203.10    5.79
  -6   7  -2  215.96    6.05
   6  -7   2  224.83    6.15
  -6  -7  -2  226.54    5.42
  -6  -7  -2  218.55    6.83
   6   7   3  169.93    5.27
  -6   7  -3  155.30    4.67
   6  -7   3  152.28    4.73
  -6  -7  -3  174.83    5.72
   6   7   3  159.47    5.16
  -6  -7  -3  157.66    4.00
   6  -7   3  157.97    4.95
   6   7   4   30.20    2.35
  -6  -7  -4   28.74    2.81
   6   7   4   27.61    2.35
   6  -7   4   31.39    2.10
  -6   7  -4   29.12    2.07
  -6  -7  -4   30.30    1.28
   6  -7   4   31.11    2.24
   6   7   5   29.55    2.29
  -6   7  -5   24.06    2.09
  -6   7  -5   26.06    2.08
   6  -7   5   26.12    2.15
   6   7   5   28.45    2.37
  -6  -7  -5   28.02    1.10
   6  -7   5   28.86    2.29
  -6   7  -6  278.21    7.55
   6  -7   6  294.79    7.92
  -6   7  -6  286.83    7.62
   6   7   6  283.37    7.94
   6  -7   6  273.57    7.87
   6  -7   7    1.48    1.73
  -6   7  -7   -0.54    1.66
   6  -7   7    0.83    1.69
  -6   7  -7   -0.76    1.62
   6   7   7    4.76    1.92
   6   7   8   38.66    2.76
   6  -7   8   36.85    2.74
   6   7   9  163.41    5.41
   6  -7   9  148.87    5.53
   6   7  10   32.49    2.39
   6   7  10   27.87    2.65
   6  -8 -11   17.14    1.74
   6   8 -11   13.94    2.53
  -6  -8  11   13.75    2.22
  -6  -8  11   16.62    2.25
   6  -8 -10    8.07    1.41
   6   8 -10    8.26    2.17
  -6  -8  10    7.15    2.01
  -6   8  10    9.13    2.07
   6   8 -10    7.58    1.18
  -6  -8  10    8.13    1.94
   6   8  -9   32.32    2.39
   6   8  -9   34.80    2.93
  -6  -8   9   34.36    2.64
   6   8  -9   35.81    1.84
  -6   8   9   33.40    2.21
   6  -8  -9   32.27    1.85
  -6  -8   9   35.71    2.62
  -6  -8   8  166.81    5.66
  -6   8   8  181.54    5.19
   6   8  -8  176.31    4.78
   6  -8  -8  171.33    4.69
  -6  -8   8  168.26    5.48
   6   8  -8  177.97    5.45
  -6  -8   7  837.58   19.20
  -6  -8   7  801.71   19.35
  -6   8   7  867.96   18.93
   6   8  -7  832.33   18.56
   6  -8  -7  820.10   18.27
   6   8  -7  851.30   19.22
  -6  -8   6  285.57    7.98
  -6   8   6  275.56    6.36
  -6   8   6  312.37    7.68
   6  -8  -6  300.97    7.05
   6   8  -6  297.98    7.91
   6   8  -6  294.92    7.39
  -6  -8   5    7.45    1.77
   6   8  -5    5.48    1.90
  -6   8   5    5.91    0.82
   6   8  -5    9.86    1.61
  -6   8   5    7.77    1.71
   6  -8  -5    8.19    1.29
   6   8  -5    7.98    1.70
  -6  -8   4  269.33    7.38
  -6   8   4  260.16    6.27
   6   8  -4  279.90    7.85
  -6   8   4  272.29    7.22
   6   8  -4  273.68    7.56
   6  -8  -4  279.90    6.73
  -6  -8   4  272.59    7.31
   6   8  -4  261.51    7.15
  -6  -8   3    8.87    1.77
   6   8  -3    9.74    2.02
  -6   8   3    7.48    1.02
   6   8  -3    7.63    1.66
   6   8  -3    5.58    1.69
  -6   8   3    5.85    1.59
   6  -8  -3    6.67    1.26
  -6  -8   3    7.62    1.73
   6  -8  -2   13.59    0.69
   6   8  -2   13.81    2.01
  -6   8   2   14.85    1.24
   6   8  -2   13.60    1.90
   6  -8  -2   14.49    1.36
   6   8  -2   12.66    1.91
  -6   8   2   14.12    1.80
  -6  -8   2   14.52    1.78
   6   8  -1    9.89    1.86
   6  -8  -1   11.00    0.97
  -6   8   1   12.09    1.30
   6   8  -1    8.62    1.86
   6   8  -1   11.26    1.94
   6  -8  -1    8.33    1.34
  -6   8   1   11.74    1.76
  -6  -8   1   14.81    1.74
   6   8   0  397.83   10.38
   6  -8   0  403.94    9.27
  -6   8   0  400.84    9.46
  -6   8   0  399.50    9.92
   6  -8   0  401.14    9.75
  -6  -8   0  410.22    9.60
   6   8   0  384.16   10.16
   6   8   1    8.04    1.74
   6  -8   1    6.33    1.20
  -6   8  -1    6.93    1.33
   6  -8   1    7.70    1.53
  -6  -8  -1    7.94    1.30
  -6   8  -1    7.08    1.70
  -6   8  -2    1.09    1.54
   6   8   2    0.20    1.57
   6  -8   2    1.18    1.22
  -6   8  -2   -0.25    1.31
   6  -8   2    0.32    1.39
  -6  -8  -2    1.12    1.09
   6   8   3   59.77    3.13
  -6  -8  -3   58.15    3.49
   6  -8   3   62.58    2.72
  -6   8  -3   57.59    2.65
   6   8   3   58.39    3.11
   6   8   3   64.41    3.27
   6  -8   3   56.86    2.89
  -6  -8  -3   59.25    2.07
   6   8   4  168.14    5.47
   6  -8   4  162.84    5.10
  -6   8  -4  169.44    5.06
  -6  -8  -4  171.50    6.03
   6   8   4  164.51    5.47
  -6   8  -4  151.33    5.03
  -6  -8  -4  165.73    4.05
   6  -8   4  166.50    5.36
   6  -8   5    7.39    1.76
   6   8   5    7.67    1.87
  -6   8  -5    6.26    1.73
   6   8   5    3.75    1.85
   6  -8   5    6.35    1.66
  -6   8  -5    5.79    1.63
  -6  -8  -5    5.38    0.75
   6  -8   6   11.64    1.91
   6   8   6    9.51    1.87
   6   8   6    8.98    2.04
  -6   8  -6   12.80    1.93
   6  -8   6   14.16    2.01
  -6   8  -6   16.43    1.89
   6  -8   7   -1.01    1.84
   6   8   7    0.51    1.72
   6   8   7   -1.05    1.96
   6   8   8   50.96    3.12
   6  -8   8   51.48    3.22
   6  -8   9  100.42    4.59
[truncated: 170,544 more chars]
