# Supplementary material for: Structural (XRD) Characterization and an Analysis of H-Bonding Motifs in Some Tetrahydroxidohexaoxidopentaborate(1-) Salts of N-Substituted Guanidinium Cations
Source: Molecules. 2023 Apr 6;28(7):3273. doi: 10.3390/molecules28073273 (PMC10096507; doi:10.3390/molecules28073273)
Supplement: Supplementary file 1 [file molecules-28-03273-s001.zip › MAB4.cif]

data_MAB4

#2011src0322

_audit_creation_date               2023-03-16
_audit_creation_method
;
Olex2 1.5
(compiled 2023.03.06 svn.rbb2c1857 for OlexSys, GUI svn.r6748)
;
_shelx_SHELXL_version_number       '2018/3'
loop_
  _audit_author_name
  _audit_author_email
  _audit_author_address
 'Beckett, M.A.' ''
;
Bangor University
School of Chemistry
Bangor
LL57 2UW
UK
;
 'Horton, P.N.' pnh@soton.ac.uk
;
University of Southampton
Chemistry
Southampton
SO17 1BJ
UK
;

_audit_contact_author_address      ?
_audit_contact_author_email        ?
_audit_contact_author_name         ''
_audit_contact_author_phone        ?
_publ_contact_author_id_orcid      ?
_publ_section_references
;
Dolomanov, O.V., Bourhis, L.J., Gildea, R.J, Howard, J.A.K. & Puschmann, H.
 (2009), J. Appl. Cryst. 42, 339-341.

Sheldrick, G.M. (2015). Acta Cryst. C71, 3-8.
;
_chemical_name_common              ?
_chemical_name_systematic
;
 ?
;
_chemical_formula_moiety           'B5 H4 O10, C5 H14 N3'
_chemical_formula_sum              'C5 H18 B5 N3 O10'
_chemical_formula_weight           334.27
_chemical_melting_point            ?
loop_
  _atom_type_symbol
  _atom_type_description
  _atom_type_scat_dispersion_real
  _atom_type_scat_dispersion_imag
  _atom_type_scat_source
 'C' 'C' 0.0033 0.0016 'International Tables Vol C Tables 4.2.6.8 and 6.1.1.4'
 'H' 'H' 0.0000 0.0000 'International Tables Vol C Tables 4.2.6.8 and 6.1.1.4'
 'B' 'B' 0.0013 0.0007 'International Tables Vol C Tables 4.2.6.8 and 6.1.1.4'
 'N' 'N' 0.0061 0.0033 'International Tables Vol C Tables 4.2.6.8 and 6.1.1.4'
 'O' 'O' 0.0106 0.0060 'International Tables Vol C Tables 4.2.6.8 and 6.1.1.4'

_shelx_space_group_comment
;
The symmetry employed for this shelxl refinement is uniquely defined
by the following loop, which should always be used as a source of
symmetry information in preference to the above space-group names.
They are only intended as comments.
;
_space_group_crystal_system        'triclinic'
_space_group_IT_number             2
_space_group_name_H-M_alt          'P -1'
_space_group_name_Hall             '-P 1'
loop_
  _space_group_symop_operation_xyz
 'x, y, z'
 '-x, -y, -z'

_cell_length_a                     9.5035(3)
_cell_length_b                     9.5151(3)
_cell_length_c                     10.4386(3)
_cell_angle_alpha                  65.3810(10)
_cell_angle_beta                   69.049(2)
_cell_angle_gamma                  88.603(2)
_cell_volume                       792.72(4)
_cell_formula_units_Z              2
_cell_measurement_reflns_used      3558
_cell_measurement_temperature      120(2)
_cell_measurement_theta_max        27.485
_cell_measurement_theta_min        2.910
_shelx_estimated_absorpt_T_max     0.983
_shelx_estimated_absorpt_T_min     0.957
_exptl_absorpt_coefficient_mu      0.123
_exptl_absorpt_correction_T_max    0.9831
_exptl_absorpt_correction_T_min    0.9572
_exptl_absorpt_correction_type     multi-scan
_exptl_absorpt_process_details     'SADABS 2007/2 (Sheldrick, G.M., 2007)'
_exptl_absorpt_special_details     ?
_exptl_crystal_colour              colourless
_exptl_crystal_colour_primary      colourless
_exptl_crystal_density_diffrn      1.400
_exptl_crystal_density_meas        x
_exptl_crystal_density_method      'not measured'
_exptl_crystal_description         Block
_exptl_crystal_F_000               348
_exptl_crystal_size_max            0.36
_exptl_crystal_size_mid            0.2
_exptl_crystal_size_min            0.14
_exptl_special_details
;
SADABS was used to perform the Absorption correction
Estimated minimum and maximum transmission: 0.6880 0.7456
The given Tmin and Tmax were generated using the SHELX SIZE command
;
_exptl_transmission_factor_max     ?
_exptl_transmission_factor_min     ?
_diffrn_reflns_av_R_equivalents    0.0406
_diffrn_reflns_av_unetI/netI       0.0378
_diffrn_reflns_Laue_measured_fraction_full  0.997
_diffrn_reflns_Laue_measured_fraction_max  0.991
_diffrn_reflns_limit_h_max         12
_diffrn_reflns_limit_h_min         -12
_diffrn_reflns_limit_k_max         12
_diffrn_reflns_limit_k_min         -12
_diffrn_reflns_limit_l_max         13
_diffrn_reflns_limit_l_min         -13
_diffrn_reflns_number              16517
_diffrn_reflns_point_group_measured_fraction_full  0.997
_diffrn_reflns_point_group_measured_fraction_max  0.991
_diffrn_reflns_theta_full          25.242
_diffrn_reflns_theta_max           27.575
_diffrn_reflns_theta_min           3.071
_diffrn_ambient_temperature        120(2)
_diffrn_detector_area_resol_mean   9.091
_diffrn_measured_fraction_theta_full  0.997
_diffrn_measured_fraction_theta_max  0.991
_diffrn_measurement_device_type   
 'Bruker-Nonius Roper CCD camera on \k-goniostat'
_diffrn_measurement_method         '\f & \w scans'
_diffrn_radiation_monochromator    graphite
_diffrn_radiation_type             MoK\a
_diffrn_radiation_wavelength       0.71073
_diffrn_source                     'Bruker-Nonius FR591 rotating anode'
_diffrn_source_current             85.0
_diffrn_source_power               4.25
_diffrn_source_voltage             50.0
_diffrn_standards_decay_%          ?
_diffrn_standards_interval_count   ?
_diffrn_standards_interval_time    ?
_diffrn_standards_number           ?
_reflns_Friedel_coverage           0.000
_reflns_Friedel_fraction_full      .
_reflns_Friedel_fraction_max       .
_reflns_number_gt                  2972
_reflns_number_total               3638
_reflns_special_details
;
 Reflections were merged by SHELXL according to the crystal
 class for the calculation of statistics and refinement.
 
 _reflns_Friedel_fraction is defined as the number of unique
 Friedel pairs measured divided by the number that would be
 possible theoretically, ignoring centric projections and
 systematic absences.
;
_reflns_threshold_expression       >2\s(I)
_computing_cell_refinement        
 'DENZO (Otwinowski & Minor, 1997) & COLLECT (Hooft, R.W.W., 1998)'
_computing_data_collection         'COLLECT (Hooft, R.W.W., 1998)'
_computing_data_reduction         
 'DENZO (Otwinowski & Minor, 1997) & COLLECT (Hooft, R.W.W., 1998)'
_computing_molecular_graphics      'Olex2 1.5 (Dolomanov et al., 2009)'
_computing_publication_material    'Olex2 1.5 (Dolomanov et al., 2009)'
_computing_structure_refinement    'SHELXL 2018/3 (Sheldrick, 2015)'
_computing_structure_solution      'SHELXS-97 (Sheldrick, 2008)'
_refine_diff_density_max           0.197
_refine_diff_density_min           -0.238
_refine_diff_density_rms           0.048
_refine_ls_extinction_coef         0.026(4)
_refine_ls_extinction_expression  
 'Fc^*^=kFc[1+0.001xFc^2^\l^3^/sin(2\q)]^-1/4^'
_refine_ls_extinction_method       'SHELXL-2018/3 (Sheldrick 2018)'
_refine_ls_goodness_of_fit_ref     1.057
_refine_ls_hydrogen_treatment      mixed
_refine_ls_matrix_type             full
_refine_ls_number_parameters       231
_refine_ls_number_reflns           3652
_refine_ls_number_restraints       0
_refine_ls_R_factor_all            0.0493
_refine_ls_R_factor_gt             0.0373
_refine_ls_restrained_S_all        1.057
_refine_ls_shift/su_max            0.000
_refine_ls_shift/su_mean           0.000
_refine_ls_structure_factor_coef   Fsqd
_refine_ls_weighting_details      
 'w=1/[\s^2^(Fo^2^)+(0.0386P)^2^+0.2240P] where P=(Fo^2^+2Fc^2^)/3'
_refine_ls_weighting_scheme        calc
_refine_ls_wR_factor_gt            0.0873
_refine_ls_wR_factor_ref           0.0935
_refine_special_details
;
Refinement of F^2^ against ALL reflections. The weighted R-factor wR and
 goodness of fit S are based on F^2^, conventional R-factors R are based
 on F, with F set to zero for negative F^2^. The threshold expression of
 F^2^ > 2\s(F^2^) is used only for calculating R-factors(gt) etc. and is
 not relevant to the choice of reflections for refinement. R-factors based
 on F^2^ are statistically about twice as large as those based on F, and R-
 factors based on ALL data will be even larger.
;
_olex2_refinement_description
;
1. Fixed Uiso
 At 1.2 times of:
  All N(H,H) groups
 At 1.5 times of:
  All C(H,H,H) groups, All O(H) groups
2.a Idealised Me refined as rotating group:
 C2(H2A,H2B,H2C), C3(H3A,H3B,H3C), C4(H4A,H4B,H4C), C5(H5A,H5B,H5C)
;
_atom_sites_solution_hydrogens     mixed
_atom_sites_solution_primary       ?
_atom_sites_solution_secondary     ?
loop_
  _atom_site_label
  _atom_site_type_symbol
  _atom_site_fract_x
  _atom_site_fract_y
  _atom_site_fract_z
  _atom_site_U_iso_or_equiv
  _atom_site_adp_type
  _atom_site_occupancy
  _atom_site_site_symmetry_order
  _atom_site_calc_flag
  _atom_site_refinement_flags_posn
  _atom_site_refinement_flags_adp
  _atom_site_refinement_flags_occupancy
  _atom_site_disorder_assembly
  _atom_site_disorder_group
 B1 B 0.33603(16) 0.59841(15) 0.76680(16) 0.0136(3) Uani 1 1 d . . . . .
 B2 B 0.48940(16) 0.71878(16) 0.85612(16) 0.0160(3) Uani 1 1 d . . . . .
 B3 B 0.37857(15) 0.88515(16) 0.68390(16) 0.0137(3) Uani 1 1 d . . . . .
 B4 B 0.12940(16) 0.37008(16) 0.90929(17) 0.0169(3) Uani 1 1 d . . . . .
 B5 B 0.35072(16) 0.36891(16) 0.70914(16) 0.0148(3) Uani 1 1 d . . . . .
 O1 O 0.43133(10) 0.59105(9) 0.85362(10) 0.0164(2) Uani 1 1 d . . . . .
 O2 O 0.46362(10) 0.86757(10) 0.77246(10) 0.0163(2) Uani 1 1 d . . . . .
 O3 O 0.32704(10) 0.76005(9) 0.67296(10) 0.0147(2) Uani 1 1 d . . . . .
 O4 O 0.18104(10) 0.51845(10) 0.87534(10) 0.0159(2) Uani 1 1 d . . . . .
 O5 O 0.22139(10) 0.28827(10) 0.83695(10) 0.0187(2) Uani 1 1 d . . . . .
 O6 O 0.40140(9) 0.52012(9) 0.66689(10) 0.0152(2) Uani 1 1 d . . . . .
 O7 O 0.57485(11) 0.70965(11) 0.93846(12) 0.0244(2) Uani 1 1 d . . . . .
 H7 H 0.577(2) 0.615(2) 0.996(2) 0.037 Uiso 1 1 d . U . . .
 O8 O 0.34289(10) 1.02664(10) 0.60798(10) 0.0174(2) Uani 1 1 d . . . . .
 H8 H 0.3703(18) 1.1002(19) 0.6244(18) 0.026 Uiso 1 1 d . U . . .
 O9 O -0.01304(11) 0.29763(11) 1.00873(11) 0.0254(2) Uani 1 1 d . . . . .
 H9 H -0.067(2) 0.358(2) 1.044(2) 0.038 Uiso 1 1 d . U . . .
 O10 O 0.42124(11) 0.29123(10) 0.62489(11) 0.0193(2) Uani 1 1 d . . . . .
 H10 H 0.4865(19) 0.352(2) 0.534(2) 0.029 Uiso 1 1 d . U . . .
 C1 C 0.13924(14) 0.84310(14) 0.38270(15) 0.0175(3) Uani 1 1 d . . . . .
 C2 C 0.30521(18) 0.9084(2) 0.12031(17) 0.0326(4) Uani 1 1 d . . . . .
 H2A H 0.346283 1.018486 0.079774 0.049 Uiso 1 1 calc R U . . .
 H2B H 0.297639 0.888123 0.038181 0.049 Uiso 1 1 calc R U . . .
 H2C H 0.373050 0.841865 0.162354 0.049 Uiso 1 1 calc R U . . .
 C3 C 0.03206(17) 0.92884(17) 0.18413(17) 0.0274(3) Uani 1 1 d . . . . .
 H3A H -0.057801 0.930543 0.266984 0.041 Uiso 1 1 calc R U . . .
 H3B H 0.005403 0.858173 0.147108 0.041 Uiso 1 1 calc R U . . .
 H3C H 0.067493 1.034437 0.100519 0.041 Uiso 1 1 calc R U . . .
 C4 C -0.02220(17) 0.78161(19) 0.64697(17) 0.0299(3) Uani 1 1 d . . . . .
 H4A H 0.009096 0.688336 0.711291 0.045 Uiso 1 1 calc R U . . .
 H4B H -0.130823 0.782586 0.698142 0.045 Uiso 1 1 calc R U . . .
 H4C H 0.037034 0.875350 0.629396 0.045 Uiso 1 1 calc R U . . .
 C5 C -0.10779(18) 0.67360(18) 0.50482(19) 0.0340(4) Uani 1 1 d . . . . .
 H5A H -0.066737 0.655288 0.413502 0.051 Uiso 1 1 calc R U . . .
 H5B H -0.201117 0.720668 0.507905 0.051 Uiso 1 1 calc R U . . .
 H5C H -0.130926 0.574002 0.595905 0.051 Uiso 1 1 calc R U . . .
 N1 N 0.25985(13) 0.87533(15) 0.40740(15) 0.0230(3) Uani 1 1 d . . . . .
 H1A H 0.3382(19) 0.9425(19) 0.329(2) 0.028 Uiso 1 1 d . U . . .
 H1B H 0.2615(18) 0.8322(19) 0.501(2) 0.028 Uiso 1 1 d . U . . .
 N2 N 0.15372(13) 0.87385(13) 0.24081(13) 0.0214(3) Uani 1 1 d . . . . .
 N3 N 0.00486(13) 0.77946(14) 0.50057(13) 0.0225(3) Uani 1 1 d . . . . .

loop_
  _atom_site_aniso_label
  _atom_site_aniso_U_11
  _atom_site_aniso_U_22
  _atom_site_aniso_U_33
  _atom_site_aniso_U_23
  _atom_site_aniso_U_13
  _atom_site_aniso_U_12
 B1 0.0151(7) 0.0113(6) 0.0139(7) -0.0056(5) -0.0049(5) 0.0010(5)
 B2 0.0168(7) 0.0151(7) 0.0169(7) -0.0074(6) -0.0066(6) 0.0013(5)
 B3 0.0125(6) 0.0143(6) 0.0141(7) -0.0069(5) -0.0039(5) 0.0012(5)
 B4 0.0182(7) 0.0145(7) 0.0167(7) -0.0072(6) -0.0049(6) 0.0006(5)
 B5 0.0165(7) 0.0120(6) 0.0167(7) -0.0064(5) -0.0071(6) 0.0020(5)
 O1 0.0212(5) 0.0125(4) 0.0188(5) -0.0071(4) -0.0109(4) 0.0029(3)
 O2 0.0208(5) 0.0135(4) 0.0180(5) -0.0073(4) -0.0104(4) 0.0014(3)
 O3 0.0178(4) 0.0114(4) 0.0173(5) -0.0068(4) -0.0086(4) 0.0015(3)
 O4 0.0157(4) 0.0130(4) 0.0176(5) -0.0085(4) -0.0027(4) -0.0001(3)
 O5 0.0187(5) 0.0133(4) 0.0201(5) -0.0091(4) -0.0006(4) -0.0013(4)
 O6 0.0166(4) 0.0124(4) 0.0154(4) -0.0074(4) -0.0029(4) -0.0005(3)
 O7 0.0343(6) 0.0156(5) 0.0298(6) -0.0072(4) -0.0227(5) 0.0022(4)
 O8 0.0217(5) 0.0124(4) 0.0225(5) -0.0088(4) -0.0120(4) 0.0029(4)
 O9 0.0205(5) 0.0182(5) 0.0296(6) -0.0147(4) 0.0046(4) -0.0037(4)
 O10 0.0214(5) 0.0132(4) 0.0178(5) -0.0082(4) 0.0003(4) -0.0016(4)
 C1 0.0181(6) 0.0164(6) 0.0207(7) -0.0092(5) -0.0092(5) 0.0046(5)
 C2 0.0321(8) 0.0426(9) 0.0228(8) -0.0165(7) -0.0076(7) 0.0072(7)
 C3 0.0333(8) 0.0264(7) 0.0308(8) -0.0114(6) -0.0226(7) 0.0042(6)
 C4 0.0259(8) 0.0395(9) 0.0220(7) -0.0137(7) -0.0065(6) 0.0076(6)
 C5 0.0263(8) 0.0320(8) 0.0378(9) -0.0065(7) -0.0155(7) -0.0073(6)
 N1 0.0194(6) 0.0288(6) 0.0192(6) -0.0067(5) -0.0098(5) -0.0019(5)
 N2 0.0229(6) 0.0254(6) 0.0199(6) -0.0113(5) -0.0109(5) 0.0036(5)
 N3 0.0175(6) 0.0282(6) 0.0215(6) -0.0100(5) -0.0081(5) 0.0007(5)

_geom_special_details
;
 All esds (except the esd in the dihedral angle between two l.s. planes)
 are estimated using the full covariance matrix.  The cell esds are taken
 into account individually in the estimation of esds in distances, angles
 and torsion angles; correlations between esds in cell parameters are only
 used when they are defined by crystal symmetry.  An approximate (isotropic)
 treatment of cell esds is used for estimating esds involving l.s. planes.
;
loop_
  _geom_bond_atom_site_label_1
  _geom_bond_atom_site_label_2
  _geom_bond_distance
  _geom_bond_site_symmetry_2
  _geom_bond_publ_flag
 B1 O1 1.4757(16) . ?
 B1 O3 1.4596(15) . ?
 B1 O4 1.4748(16) . ?
 B1 O6 1.4799(15) . ?
 B2 O1 1.3608(16) . ?
 B2 O2 1.3904(17) . ?
 B2 O7 1.3562(17) . ?
 B3 O2 1.3910(16) . ?
 B3 O3 1.3607(15) . ?
 B3 O8 1.3552(16) . ?
 B4 O4 1.3609(16) . ?
 B4 O5 1.3875(16) . ?
 B4 O9 1.3526(17) . ?
 B5 O5 1.3783(16) . ?
 B5 O6 1.3600(15) . ?
 B5 O10 1.3656(16) . ?
 O7 H7 0.851(19) . ?
 O8 H8 0.854(17) . ?
 O9 H9 0.86(2) . ?
 O10 H10 0.873(18) . ?
 C1 N1 1.3299(17) . ?
 C1 N2 1.3392(17) . ?
 C1 N3 1.3434(17) . ?
 C2 H2A 0.9800 . ?
 C2 H2B 0.9800 . ?
 C2 H2C 0.9800 . ?
 C2 N2 1.4651(19) . ?
 C3 H3A 0.9800 . ?
 C3 H3B 0.9800 . ?
 C3 H3C 0.9800 . ?
 C3 N2 1.4706(17) . ?
 C4 H4A 0.9800 . ?
 C4 H4B 0.9800 . ?
 C4 H4C 0.9800 . ?
 C4 N3 1.4652(18) . ?
 C5 H5A 0.9800 . ?
 C5 H5B 0.9800 . ?
 C5 H5C 0.9800 . ?
 C5 N3 1.4642(18) . ?
 N1 H1A 0.884(17) . ?
 N1 H1B 0.894(18) . ?

loop_
  _geom_angle_atom_site_label_1
  _geom_angle_atom_site_label_2
  _geom_angle_atom_site_label_3
  _geom_angle
  _geom_angle_site_symmetry_1
  _geom_angle_site_symmetry_3
  _geom_angle_publ_flag
 O1 B1 O6 109.67(10) . . ?
 O3 B1 O1 111.07(9) . . ?
 O3 B1 O4 108.70(10) . . ?
 O3 B1 O6 108.97(10) . . ?
 O4 B1 O1 108.73(10) . . ?
 O4 B1 O6 109.67(9) . . ?
 O1 B2 O2 120.95(11) . . ?
 O7 B2 O1 122.79(12) . . ?
 O7 B2 O2 116.27(11) . . ?
 O3 B3 O2 120.80(11) . . ?
 O8 B3 O2 121.02(11) . . ?
 O8 B3 O3 118.17(11) . . ?
 O4 B4 O5 120.35(11) . . ?
 O9 B4 O4 122.69(12) . . ?
 O9 B4 O5 116.91(11) . . ?
 O6 B5 O5 121.24(11) . . ?
 O6 B5 O10 122.08(12) . . ?
 O10 B5 O5 116.63(11) . . ?
 B2 O1 B1 123.55(10) . . ?
 B2 O2 B3 119.10(10) . . ?
 B3 O3 B1 123.82(10) . . ?
 B4 O4 B1 123.03(10) . . ?
 B5 O5 B4 118.76(10) . . ?
 B5 O6 B1 121.96(10) . . ?
 B2 O7 H7 112.0(12) . . ?
 B3 O8 H8 115.1(11) . . ?
 B4 O9 H9 112.4(12) . . ?
 B5 O10 H10 113.9(11) . . ?
 N1 C1 N2 119.51(12) . . ?
 N1 C1 N3 119.51(12) . . ?
 N2 C1 N3 120.98(11) . . ?
 H2A C2 H2B 109.5 . . ?
 H2A C2 H2C 109.5 . . ?
 H2B C2 H2C 109.5 . . ?
 N2 C2 H2A 109.5 . . ?
 N2 C2 H2B 109.5 . . ?
 N2 C2 H2C 109.5 . . ?
 H3A C3 H3B 109.5 . . ?
 H3A C3 H3C 109.5 . . ?
 H3B C3 H3C 109.5 . . ?
 N2 C3 H3A 109.5 . . ?
 N2 C3 H3B 109.5 . . ?
 N2 C3 H3C 109.5 . . ?
 H4A C4 H4B 109.5 . . ?
 H4A C4 H4C 109.5 . . ?
 H4B C4 H4C 109.5 . . ?
 N3 C4 H4A 109.5 . . ?
 N3 C4 H4B 109.5 . . ?
 N3 C4 H4C 109.5 . . ?
 H5A C5 H5B 109.5 . . ?
 H5A C5 H5C 109.5 . . ?
 H5B C5 H5C 109.5 . . ?
 N3 C5 H5A 109.5 . . ?
 N3 C5 H5B 109.5 . . ?
 N3 C5 H5C 109.5 . . ?
 C1 N1 H1A 118.6(11) . . ?
 C1 N1 H1B 121.2(10) . . ?
 H1A N1 H1B 120.2(15) . . ?
 C1 N2 C2 120.24(11) . . ?
 C1 N2 C3 122.29(12) . . ?
 C2 N2 C3 114.07(12) . . ?
 C1 N3 C4 120.99(11) . . ?
 C1 N3 C5 122.61(12) . . ?
 C5 N3 C4 114.85(12) . . ?

loop_
  _geom_hbond_atom_site_label_D
  _geom_hbond_atom_site_label_H
  _geom_hbond_atom_site_label_A
  _geom_hbond_distance_DH
  _geom_hbond_distance_HA
  _geom_hbond_distance_DA
  _geom_hbond_angle_DHA
  _geom_hbond_site_symmetry_A
  _geom_hbond_publ_flag
 O7 H7 O1 0.851(19) 1.92(2) 2.7647(13) 173.5(18) 2_667 yes
 O8 H8 O10 0.854(17) 1.895(17) 2.7350(12) 167.8(15) 1_565 yes
 O9 H9 O4 0.86(2) 1.84(2) 2.7060(13) 177.9(18) 2_567 yes
 O10 H10 O6 0.873(18) 1.828(18) 2.6946(13) 171.1(15) 2_666 yes
 N1 H1A O2 0.884(17) 2.253(17) 3.0618(15) 152.0(14) 2_676 yes
 N1 H1B O3 0.894(18) 1.959(18) 2.8274(15) 163.7(15) . yes

loop_
  _geom_torsion_atom_site_label_1
  _geom_torsion_atom_site_label_2
  _geom_torsion_atom_site_label_3
  _geom_torsion_atom_site_label_4
  _geom_torsion
  _geom_torsion_site_symmetry_1
  _geom_torsion_site_symmetry_2
  _geom_torsion_site_symmetry_3
  _geom_torsion_site_symmetry_4
  _geom_torsion_publ_flag
 O1 B1 O3 B3 -10.07(16) . . . . ?
 O1 B1 O4 B4 -100.51(13) . . . . ?
 O1 B1 O6 B5 96.39(12) . . . . ?
 O1 B2 O2 B3 -0.74(18) . . . . ?
 O2 B2 O1 B1 -1.20(19) . . . . ?
 O2 B3 O3 B1 9.13(18) . . . . ?
 O3 B1 O1 B2 6.11(16) . . . . ?
 O3 B1 O4 B4 138.46(11) . . . . ?
 O3 B1 O6 B5 -141.83(11) . . . . ?
 O3 B3 O2 B2 -3.10(18) . . . . ?
 O4 B1 O1 B2 -113.46(12) . . . . ?
 O4 B1 O3 B3 109.51(12) . . . . ?
 O4 B1 O6 B5 -22.96(15) . . . . ?
 O4 B4 O5 B5 -13.65(18) . . . . ?
 O5 B4 O4 B1 -2.37(19) . . . . ?
 O5 B5 O6 B1 9.66(18) . . . . ?
 O6 B1 O1 B2 126.62(12) . . . . ?
 O6 B1 O3 B3 -131.00(11) . . . . ?
 O6 B1 O4 B4 19.41(16) . . . . ?
 O6 B5 O5 B4 10.02(18) . . . . ?
 O7 B2 O1 B1 178.94(12) . . . . ?
 O7 B2 O2 B3 179.12(11) . . . . ?
 O8 B3 O2 B2 175.95(11) . . . . ?
 O8 B3 O3 B1 -169.94(11) . . . . ?
 O9 B4 O4 B1 -179.85(12) . . . . ?
 O9 B4 O5 B5 163.97(12) . . . . ?
 O10 B5 O5 B4 -167.61(11) . . . . ?
 O10 B5 O6 B1 -172.84(11) . . . . ?
 N1 C1 N2 C2 13.89(19) . . . . ?
 N1 C1 N2 C3 -144.09(13) . . . . ?
 N1 C1 N3 C4 15.85(19) . . . . ?
 N1 C1 N3 C5 -149.25(13) . . . . ?
 N2 C1 N3 C4 -164.49(13) . . . . ?
 N2 C1 N3 C5 30.42(19) . . . . ?
 N3 C1 N2 C2 -165.77(12) . . . . ?
 N3 C1 N2 C3 36.25(18) . . . . ?

_shelx_res_file
;
TITL 2011src0322 in P-1
    2011src0322.res
    created by SHELXL-2018/3 at 10:21:23 on 16-Mar-2023
CELL 0.71073 9.5035 9.5151 10.4386 65.381 69.049 88.603
ZERR 2 0.0003 0.0003 0.0003 0.001 0.002 0.002
LATT 1
SFAC C H B N O
UNIT 10 36 10 6 20
EQIV $1 1-X,1-Y,2-Z
EQIV $2 +X,1+Y,+Z
EQIV $3 -X,1-Y,2-Z
EQIV $4 1-X,1-Y,1-Z
EQIV $5 1-X,2-Y,1-Z

L.S. 15
PLAN  5
SIZE 0.14 0.2 0.36
TEMP -153(2)
HTAB O7 O1_$1
HTAB O8 O10_$2
HTAB O9 O4_$3
HTAB O10 O6_$4
HTAB N1 O2_$5
HTAB N1 O3
CONF
HTAB
BOND $H
MORE -1
fmap 2
acta
MERG 2
OMIT 1 1 1
REM <olex2.extras>
REM <HklSrc "%.\\2011src0322.hkl">
REM </olex2.extras>

WGHT    0.038600    0.224000
EXTI    0.026327
FVAR       1.36358
B1    3    0.336028    0.598408    0.766801    11.00000    0.01509    0.01132 =
         0.01393   -0.00556   -0.00494    0.00101
B2    3    0.489405    0.718777    0.856122    11.00000    0.01679    0.01508 =
         0.01686   -0.00736   -0.00663    0.00128
B3    3    0.378572    0.885146    0.683898    11.00000    0.01246    0.01431 =
         0.01409   -0.00686   -0.00394    0.00124
B4    3    0.129402    0.370080    0.909291    11.00000    0.01823    0.01454 =
         0.01670   -0.00717   -0.00490    0.00063
B5    3    0.350717    0.368906    0.709144    11.00000    0.01648    0.01198 =
         0.01668   -0.00641   -0.00709    0.00198
O1    5    0.431330    0.591049    0.853625    11.00000    0.02116    0.01254 =
         0.01878   -0.00705   -0.01092    0.00289
O2    5    0.463619    0.867571    0.772457    11.00000    0.02083    0.01347 =
         0.01799   -0.00733   -0.01040    0.00143
O3    5    0.327041    0.760047    0.672962    11.00000    0.01780    0.01139 =
         0.01729   -0.00681   -0.00862    0.00150
O4    5    0.181041    0.518455    0.875340    11.00000    0.01570    0.01304 =
         0.01761   -0.00846   -0.00268   -0.00009
O5    5    0.221387    0.288265    0.836945    11.00000    0.01871    0.01331 =
         0.02013   -0.00910   -0.00060   -0.00126
O6    5    0.401397    0.520115    0.666890    11.00000    0.01661    0.01240 =
         0.01537   -0.00735   -0.00294   -0.00047
O7    5    0.574850    0.709647    0.938464    11.00000    0.03434    0.01564 =
         0.02983   -0.00721   -0.02270    0.00224
H7    2    0.576519    0.615494    0.996483    11.00000   -1.50000
O8    5    0.342888    1.026638    0.607976    11.00000    0.02172    0.01237 =
         0.02249   -0.00877   -0.01199    0.00295
H8    2    0.370320    1.100211    0.624445    11.00000   -1.50000
O9    5   -0.013041    0.297631    1.008727    11.00000    0.02052    0.01818 =
         0.02962   -0.01470    0.00462   -0.00368
H9    2   -0.067093    0.357625    1.043669    11.00000   -1.50000
O10   5    0.421244    0.291233    0.624892    11.00000    0.02145    0.01323 =
         0.01777   -0.00816    0.00030   -0.00164
H10   2    0.486517    0.352006    0.533600    11.00000   -1.50000
C1    1    0.139239    0.843101    0.382699    11.00000    0.01815    0.01641 =
         0.02068   -0.00919   -0.00920    0.00460
C2    1    0.305213    0.908445    0.120306    11.00000    0.03208    0.04263 =
         0.02277   -0.01649   -0.00755    0.00720
AFIX 137
H2A   2    0.346283    1.018486    0.079774    11.00000   -1.50000
H2B   2    0.297639    0.888123    0.038181    11.00000   -1.50000
H2C   2    0.373050    0.841865    0.162354    11.00000   -1.50000
AFIX   0
C3    1    0.032058    0.928837    0.184128    11.00000    0.03329    0.02644 =
         0.03083   -0.01135   -0.02255    0.00420
AFIX 137
H3A   2   -0.057801    0.930543    0.266984    11.00000   -1.50000
H3B   2    0.005403    0.858173    0.147108    11.00000   -1.50000
H3C   2    0.067493    1.034437    0.100519    11.00000   -1.50000
AFIX   0
C4    1   -0.022199    0.781610    0.646970    11.00000    0.02593    0.03953 =
         0.02198   -0.01370   -0.00654    0.00761
AFIX 137
H4A   2    0.009096    0.688336    0.711291    11.00000   -1.50000
H4B   2   -0.130823    0.782586    0.698142    11.00000   -1.50000
H4C   2    0.037034    0.875350    0.629396    11.00000   -1.50000
AFIX   0
C5    1   -0.107794    0.673602    0.504822    11.00000    0.02632    0.03196 =
         0.03778   -0.00653   -0.01547   -0.00731
AFIX 137
H5A   2   -0.066737    0.655288    0.413502    11.00000   -1.50000
H5B   2   -0.201117    0.720668    0.507905    11.00000   -1.50000
H5C   2   -0.130926    0.574002    0.595905    11.00000   -1.50000
AFIX   0
N1    4    0.259846    0.875328    0.407399    11.00000    0.01941    0.02876 =
         0.01916   -0.00666   -0.00982   -0.00186
H1A   2    0.338179    0.942527    0.329454    11.00000   -1.20000
H1B   2    0.261544    0.832194    0.500891    11.00000   -1.20000
N2    4    0.153722    0.873854    0.240811    11.00000    0.02294    0.02543 =
         0.01994   -0.01132   -0.01094    0.00356
N3    4    0.004855    0.779455    0.500571    11.00000    0.01749    0.02822 =
         0.02155   -0.00999   -0.00810    0.00074
HKLF 4


REM  2011src0322 in P-1
REM wR2 = 0.0935, GooF = S = 1.057, Restrained GooF = 1.057 for all data
REM R1 = 0.0373 for 2979 Fo > 4sig(Fo) and 0.0493 for all 3652 data
REM 231 parameters refined using 0 restraints

END

WGHT      0.0386      0.2240

REM Instructions for potential hydrogen bonds
HTAB O7 O1_$1
HTAB O8 O10_$2
HTAB O9 O4_$3
HTAB O10 O6_$4
HTAB C2 O7_$5
EQIV $6 -x, -y+2, -z+1
HTAB C3 O8_$6
EQIV $7 -x, -y+1, -z+1
HTAB C3 O5_$7
HTAB C3 O9_$7
EQIV $8 x, y+1, z-1
HTAB C3 O9_$8
HTAB N1 O2_$5
HTAB N1 O3

REM Highest difference peak  0.197,  deepest hole -0.238,  1-sigma level  0.048
Q1    1   0.3263  0.8083  0.7009  11.00000  0.05    0.19
Q2    1   0.1393  0.7840  0.2874  11.00000  0.05    0.19
Q3    1   0.4478  0.6310  0.8640  11.00000  0.05    0.18
Q4    1   0.4779  0.8772  0.1931  11.00000  0.05    0.17
Q5    1   0.1424  0.3229  0.7292  11.00000  0.05    0.17
;
_shelx_res_checksum                85143
_shelx_hkl_file
;
  -2   0   0 1887.53   75.65   1
  -2   0   0 1925.75   64.71   1
  -2   0   0 1888.93   84.81   2
   2   0   0 1929.48   78.36   1
   2   0   0 1736.28  106.42   5
   2   0   0 1964.01  113.47   2
   2   0   0 1900.26  102.63   1
  -3   0   0 1355.71   76.88   1
  -3   0   0 1319.50   57.04   1
   3   0   0 1274.11   56.02   5
   3   0   0 1322.22   75.38   1
   3   0   0 1308.28   74.58   2
   3   0   0 1259.43   64.57   1
  -4   0   0 135.495  11.783   1
  -4   0   0 136.799   9.615   1
   4   0   0 132.250   7.765   1
   4   0   0 119.242   7.185   1
   4   0   0 135.745   9.620   2
   4   0   0 121.891   6.381   5
  -5   0   0 1619.56   74.07   6
  -5   0   0 1526.90   77.05   1
  -5   0   0 1584.11   78.47   1
   5   0   0 1596.55  102.25   1
   5   0   0 1646.34   76.07   4
   5   0   0 1421.74   78.68   5
   5   0   0 1536.23   61.21   2
   5   0   0 1591.63   68.84   1
  -6   0   0 590.674  40.474   1
  -6   0   0 578.027  31.445   1
  -6   0   0 578.080  50.343   6
   6   0   0 591.302  27.993   5
   6   0   0 596.564  39.802   1
   6   0   0 599.528  25.726   1
   6   0   0 612.386  28.650   2
  -7   0   0 540.411  51.094   1
  -7   0   0 519.274  39.858   6
   7   0   0 585.990  33.115   2
   7   0   0 553.653  32.964   1
   7   0   0 536.471  28.717   5
   7   0   0 570.377  50.188   1
  -8   0   0 28.5539  5.6914   1
  -8   0   0 28.1150  6.4801   1
  -8   0   0 23.9918  9.2585   6
   8   0   0 43.6820  8.0273   1
   8   0   0 21.8350  5.7397   1
   8   0   0 27.8916  4.9233   5
  -9   0   0 318.080  30.914   1
  -9   0   0 298.549  24.308   6
  -9   0   0 300.527  23.553   1
   9   0   0 305.126  40.155   1
   9   0   0 292.461  23.582   5
   9   0   0 317.191  24.575   1
 -10   0   0  7.2883 10.1166   1
 -10   0   0 4.57491 5.53425   1
  10   0   0 4.78820 6.17360   1
 -11   0   0 13.1049  8.7241   1
 -11   1   0 6.90831 7.69277   1
  10  -1   0 1.22731 7.57757   1
 -10   1   0 -3.2527  6.3343   1
 -10   1   0 1.01920 7.49257   1
   9  -1   0 269.985  22.470   1
  -9   1   0 254.068  29.497   1
  -9   1   0 258.971  29.941   1
  -9   1   0 235.650  26.613   6
   8  -1   0 18.5292  6.2275   1
   8  -1   0 12.6520  5.1713   1
  -8   1   0 24.3349  5.7703   6
  -8   1   0 19.2098  6.9773   1
  -8   1   0 27.9588  7.7044   1
   7  -1   0 674.805  46.389   4
   7  -1   0 781.131  62.151   1
   7  -1   0 716.910  51.493   1
  -7   1   0 752.651  60.887   1
  -7   1   0 726.400  46.907   1
   6  -1   0 992.587  59.461   1
   6  -1   0 1009.97   72.22   1
   6  -1   0 950.196  57.696   4
  -6   1   0 964.920  61.330   1
  -6   1   0 986.799  55.801   1
   5  -1   0 342.941  14.190   1
   5  -1   0 359.892  26.053   1
  -5   1   0 332.680  20.022   2
  -5   1   0 354.587  20.791   1
  -5   1   0 332.693  16.322   1
   4  -1   0 35.8227  3.9790   1
   4  -1   0 40.9255  4.3596   1
  -4   1   0 38.3464  3.6379   1
  -4   1   0 31.3560  4.5364   2
  -4   1   0 31.4777  4.4595   1
   3  -1   0 2422.48  111.95   1
   3  -1   0 2509.70  127.98   1
  -3   1   0 2453.17  111.54   1
  -3   1   0 2566.24  125.61   2
  -3   1   0 2350.64   96.06   1
  -3   1   0 2387.65  110.78   5
   2  -1   0 1.08180 1.56848   1
   2  -1   0 -0.0977  1.6470   1
  -2   1   0 -0.3457  1.8134   1
  -2   1   0 2.53296 2.47982   1
   1  -1   0 -3.9888  1.3841   1
   1  -1   0 1.23908 2.04363   1
  -1   1   0 -2.0243  1.7585   1
  -1   1   0 2.49416 1.91182   1
  -1  -1   0 1317.08   75.43   6
  -1  -1   0 1401.30   51.64   1
  -1  -1   0 1469.26   73.36   4
  -1  -1   0 1379.35   86.81   1
   1   1   0 1403.35   69.37   6
  -2  -1   0 761.017  31.594   1
  -2  -1   0 764.835  39.997   6
  -2  -1   0 801.629  42.575   4
  -2  -1   0 725.439  47.241   1
   2   1   0 785.667  41.188   6
   2   1   0 778.971  36.418   1
   2   1   0 766.035  28.128   4
   2   1   0 719.975  27.022   1
  -3  -1   0 454.899  22.593   1
  -3  -1   0 429.077  27.565   6
  -3  -1   0 463.337  25.117   1
   3   1   0 460.483  20.655   4
   3   1   0 438.183  23.671   1
   3   1   0 463.745  28.856   1
  -4  -1   0 2012.04  111.65   1
  -4  -1   0 1920.47   83.40   6
  -4  -1   0 1815.15   76.23   1
   4   1   0 2004.75   85.07   1
   4   1   0 2059.22   91.20   4
   4   1   0 1939.40   95.29   2
   4   1   0 1877.85   58.15   1
  -5  -1   0 1500.99   74.36   6
  -5  -1   0 1380.95   71.04   1
  -5  -1   0 1506.03   67.63   1
   5   1   0 1509.09   67.98   1
   5   1   0 1438.50   65.12   5
   5   1   0 1530.45   71.12   2
   5   1   0 1400.67   89.96   1
  -6  -1   0 26.3403  5.5925   1
  -6  -1   0 21.3688  5.0991   6
   6   1   0 23.5627  4.1425   5
   6   1   0 21.2479  4.8764   1
   6   1   0 19.7559  4.6688   1
   6   1   0 13.3321  3.8924   2
  -7  -1   0 348.400  31.338   1
  -7  -1   0 347.364  27.346   6
  -7  -1   0 334.950  19.455   1
   7   1   0 336.510  38.726   1
   7   1   0 316.098  29.362   5
   7   1   0 361.966  26.766   2
   7   1   0 341.581  21.668   1
  -8  -1   0 197.609  24.233   1
  -8  -1   0 213.784  19.548   6
  -8  -1   0 172.569  12.756   1
   8   1   0 193.997  17.082   5
   8   1   0 197.347  13.859   2
   8   1   0 198.419  15.819   1
   8   1   0 220.727  21.019   1
  -9  -1   0 96.3177 13.0049   1
  -9  -1   0 66.3359  6.9713   1
   9   1   0 74.1797 12.9820   2
   9   1   0 76.6743  9.7610   1
   9   1   0 60.2502  7.4717   5
 -10  -1   0 341.501  36.229   1
  10   1   0 295.335  28.755   1
 -11  -1   0 -3.6979  5.9104   1
  11  -2   0 2.39579 9.39189   1
 -11   2   0  5.7732 10.9386   1
  10  -2   0 20.9474  8.3712   1
 -10   2   0 20.8718  7.5627   1
 -10   2   0 23.1317 11.2058   1
   9  -2   0 1163.77   83.92   1
  -9   2   0 993.309  91.259   1
  -9   2   0 971.128  87.847   1
   8  -2   0 217.502  24.152   1
   8  -2   0 193.246  16.329   1
   8  -2   0 217.595  15.772   4
  -8   2   0 254.736  16.697   1
  -8   2   0 209.053  17.727   1
   7  -2   0 25.1981  5.7781   1
   7  -2   0 19.1042  6.7068   1
   7  -2   0 20.5474  2.5956   4
  -7   2   0 34.0261  6.7521   1
  -7   2   0 30.9759  6.1175   2
  -7   2   0 31.1441  8.3585   1
   6  -2   0 263.014  16.957   4
   6  -2   0 244.363  14.354   1
   6  -2   0 251.141  18.484   1
  -6   2   0 241.104  19.751   1
  -6   2   0 262.609  15.391   2
  -6   2   0 241.016  13.573   1
   5  -2   0 28.4838  5.1943   1
   5  -2   0 22.9189  4.8393   1
  -5   2   0 28.1488  4.6451   1
  -5   2   0 14.9663  4.1973   2
  -5   2   0 26.2624  5.0945   1
   4  -2   0 935.191  53.089   1
   4  -2   0 973.459  57.817   1
  -4   2   0 955.158  55.366   1
  -4   2   0 944.214  50.184   5
  -4   2   0 1065.34   46.73   1
   3  -2   0 259.763  11.881   1
   3  -2   0 248.952  10.466   1
  -3   2   0 270.388  14.903   1
  -3   2   0 280.505  11.063   1
   2  -2   0 3787.58  165.02   1
   2  -2   0 3739.01  126.06   1
  -2   2   0 3643.74   89.06   1
  -2   2   0 3811.85  155.86   1
   1  -2   0 9859.87  375.49   1
   1  -2   0 9627.94  436.55   1
  -1   2   0 9832.77  467.15   1
  -1   2   0 9999.99  290.08   1
   0  -2   0 2765.54  135.51   1
   0  -2   0 2742.69  164.06   7
   0  -2   0 2807.05  158.79   4
   0  -2   0 2833.45  110.27   1
   0   2   0 2825.89  136.72   1
   0   2   0 2835.16   92.72   1
  -1  -2   0 2098.16  101.92   1
  -1  -2   0 1981.30  125.89   1
  -1  -2   0 1921.11   83.94   7
  -1  -2   0 2078.22  101.91   4
   1   2   0 2008.97  130.73   6
   1   2   0 2053.07   82.94   7
   1   2   0 2082.19  101.52   1
   1   2   0 2121.58   67.80   1
  -2  -2   0 466.308  22.333   1
  -2  -2   0 466.357  21.991   4
  -2  -2   0 461.916  19.596   1
  -2  -2   0 457.916  19.554   6
   2   2   0 458.937  25.017   1
   2   2   0 430.184  31.033   6
   2   2   0 469.963  25.626   1
  -3  -2   0 -0.7338  2.3217   6
  -3  -2   0 3.99100 1.67687   1
  -3  -2   0 5.16909 1.82870   1
  -3  -2   0 5.19748 1.37956   4
   3   2   0 4.63007 1.38486   1
   3   2   0 3.25409 3.78473   6
   3   2   0 2.93875 1.64817   1
  -4  -2   0 2012.78  120.20   6
  -4  -2   0 2109.23  112.57   1
  -4  -2   0 1882.66   94.14   1
   4   2   0 2064.93   85.22   6
   4   2   0 2104.02  138.14   1
   4   2   0 1996.64   64.66   1
  -5  -2   0 25.2441  6.9750   6
  -5  -2   0 20.3626  3.0447   1
   5   2   0 34.1343  4.4393   1
   5   2   0 24.1974  3.4216   1
  -6  -2   0 374.297  22.578   1
  -6  -2   0 391.470  27.452   1
  -6  -2   0 329.550  33.351   6
   6   2   0 359.056  28.904   5
   6   2   0 393.226  24.722   1
   6   2   0 381.776  27.667   2
   6   2   0 362.507  28.556   1
  -7  -2   0 404.080  40.867   1
  -7  -2   0 409.632  38.540   6
  -7  -2   0 442.171  38.432   1
   7   2   0 430.245  24.493   5
   7   2   0 390.046  28.318   2
   7   2   0 347.439  29.015   1
   7   2   0 369.579  37.354   1
  -8  -2   0 85.6956  9.2638   1
  -8  -2   0 62.6068 10.0557   6
  -8  -2   0 75.4551 10.9100   1
   8   2   0 57.1483  9.6023   1
   8   2   0 65.9162  7.7769   2
   8   2   0 61.2040  8.5644   5
   8   2   0 61.2023  8.4285   1
  -9  -2   0 7.08918 8.23510   1
  -9  -2   0 16.8626  5.5877   1
   9   2   0 9.61007 6.06368   1
   9   2   0 20.4534  7.0828   2
   9   2   0 9.64025 4.65179   5
   9   2   0 5.41485 4.46791   1
 -10  -2   0 58.4369 10.3817   1
  10   2   0 66.8490 11.6163   2
  11  -3   0 -2.9595  6.6201   1
 -11   3   0 14.9304  8.7863   1
  10  -3   0 22.3154  6.6963   1
 -10   3   0 13.8955  9.2993   1
 -10   3   0 4.57078 6.38431   1
   9  -3   0 660.513  43.276   4
   9  -3   0 687.091  43.629   1
  -9   3   0 639.700  55.807   2
  -9   3   0 677.304  39.132   1
  -9   3   0 728.412  52.333   1
   8  -3   0 291.322  19.648   4
   8  -3   0 284.415  25.705   1
   8  -3   0 308.508  24.926   1
  -8   3   0 296.304  26.720   1
  -8   3   0 288.627  28.550   2
  -8   3   0 299.055  23.644   1
   7  -3   0 108.148   8.675   4
   7  -3   0 102.631  11.419   1
   7  -3   0 85.2425 10.9453   1
  -7   3   0 93.1343  9.2967   2
  -7   3   0 81.1369  8.8473   1
  -7   3   0 85.7408 11.9210   1
   6  -3   0 39.9229  4.5149   4
   6  -3   0 45.7764  8.8416   1
  -6   3   0 32.9023  4.7417   2
  -6   3   0 48.4427  7.9237   1
  -6   3   0 45.3641  6.1525   1
   5  -3   0 1608.98   76.80   4
   5  -3   0 1727.70   49.10   1
   5  -3   0 1727.03   67.28   1
  -5   3   0 1731.47  107.78   1
  -5   3   0 1620.59   80.88   5
  -5   3   0 1708.10   60.50   1
   4  -3   0 1945.15   83.07   1
   4  -3   0 1832.85   81.16   1
  -4   3   0 1882.59   66.23   1
  -4   3   0 1768.75   66.26   1
   3  -3   0 -0.4892  2.5750   1
   3  -3   0 3.94420 4.10791   1
  -3   3   0 8.68245 4.94151   1
  -3   3   0 2.24323 3.43988   1
   2  -3   0 990.148  32.512   1
   2  -3   0 954.451  42.804   1
  -2   3   0 959.580  58.596   1
  -2   3   0 989.622  36.521   1
   1  -3   0 3609.42  173.92   4
   1  -3   0 3523.80   95.56   1
   1  -3   0 3436.95  112.57   1
  -1   3   0 3461.21  125.86   1
  -1   3   0 3541.80  157.14   3
  -1   3   0 3566.95   73.44   1
   0  -3   0 2.86226 2.00664   4
   0  -3   0 7.69907 1.76328   1
   0  -3   0 5.37958 2.19424   1
   0  -3   0 3.75936 2.28774   7
   0   3   0 1.23253 1.68596   1
   0   3   0 2.71624 2.09610   1
  -1  -3   0 1661.35   71.01   4
  -1  -3   0 1552.74   72.06   1
  -1  -3   0 1576.65   87.86   7
  -1  -3   0 1550.16   56.34   1
   1   3   0 1638.71   72.64   1
   1   3   0 1570.33   47.06   7
   1   3   0 1602.13   72.78   1
  -2  -3   0 0.09399 2.58880   4
  -2  -3   0 1.64045 1.84824   1
  -2  -3   0 3.42381 2.28171   1
   2   3   0 -1.6352  1.9345   1
   2   3   0 2.08941 2.30087   1
   2   3   0 1.64313 3.65167   7
   2   3   0 9.12020 2.96672   6
  -3  -3   0 1877.23   74.69   4
  -3  -3   0 1724.49   91.15   1
  -3  -3   0 1880.43  115.79   1
   3   3   0 1848.17   81.01   1
   3   3   0 1846.63   96.01   6
   3   3   0 1822.29   66.74   1
   3   3   0 1858.33   82.42   7
  -4  -3   0 1690.13   95.78   1
  -4  -3   0 1858.67   95.69   6
  -4  -3   0 1912.88   98.00   4
  -4  -3   0 1739.54   86.86   1
   4   3   0 1752.22   61.56   1
   4   3   0 1852.42   68.37   6
   4   3   0 1817.53  112.05   1
  -5  -3   0 506.646  38.891   1
  -5  -3   0 435.680  31.926   1
  -5  -3   0 438.170  34.518   6
   5   3   0 436.350  21.571   1
   5   3   0 527.452  22.099   6
   5   3   0 471.543  32.714   1
  -6  -3   0 29.5010  5.7056   6
  -6  -3   0 36.6639  5.7868   1
   6   3   0 29.3296  4.6887   1
   6   3   0 28.6103  4.9683   1
  -7  -3   0 208.684  22.426   1
  -7  -3   0 192.263  17.820   1
  -7  -3   0 189.293  16.968   6
   7   3   0 166.314  16.660   1
   7   3   0 226.276  19.674   5
   7   3   0 241.753  26.726   2
   7   3   0 211.202  19.889   1
  -8  -3   0 146.916  20.171   1
  -8  -3   0 147.771  12.676   1
   8   3   0 145.001  13.014   1
   8   3   0 137.912  14.683   2
   8   3   0 144.722  13.146   5
   8   3   0 149.979  14.901   1
  -9  -3   0 181.862  14.805   1
   9   3   0 136.339  22.524   5
   9   3   0 183.507  18.984   2
 -10  -3   0 4.47051 7.16021   1
  10   3   0 12.7800  9.2815   2
  11  -4   0 253.624  34.966   1
 -11   4   0 232.442  27.975   1
  10  -4   0 813.596  87.695   1
 -10   4   0 849.302  85.106   1
 -10   4   0 647.618  60.341   2
 -10   4   0 712.629  51.055   1
   9  -4   0 49.3688  9.7651   1
   9  -4   0 32.3366  4.5815   4
  -9   4   0 57.3975 10.7278   1
  -9   4   0 35.7368  8.7366   2
   8  -4   0 275.250  33.377   4
   8  -4   0 236.221  26.891   1
   8  -4   0 286.744  23.470   1
  -8   4   0 306.371  21.801   1
  -8   4   0 289.412  19.633   1
  -8   4   0 298.401  19.841   2
   7  -4   0 228.451  29.743   1
   7  -4   0 295.755  20.516   1
   7  -4   0 245.199  25.381   4
  -7   4   0 298.006  22.620   1
  -7   4   0 278.693  22.517   1
  -7   4   0 248.355  18.943   2
   6  -4   0 2.76060 3.73886   4
   6  -4   0 0.76098 4.21951   1
   6  -4   0 3.96718 3.81246   1
  -6   4   0 0.51855 4.55518   1
  -6   4   0 2.59872 4.27848   1
  -6   4   0 4.53899 1.36656   5
   5  -4   0 611.572  23.244   1
   5  -4   0 682.743  37.260   4
   5  -4   0 683.542  33.972   1
  -5   4   0 683.813  50.889   1
  -5   4   0 656.233  29.563   1
   4  -4   0 621.881  27.258   1
   4  -4   0 659.834  32.461   1
   4  -4   0 652.717  36.707   4
  -4   4   0 676.133  38.766   1
  -4   4   0 679.045  25.440   1
   3  -4   0 2799.41  128.10   1
   3  -4   0 2782.71  115.44   4
   3  -4   0 2720.36   91.79   1
  -3   4   0 2771.88   85.87   1
  -3   4   0 2741.01   96.19   1
   2  -4   0 465.380  21.896   4
   2  -4   0 448.087  24.863   1
   2  -4   0 488.259  17.373   1
  -2   4   0 451.052  29.078   1
  -2   4   0 477.685  20.334   1
   1  -4   0 2799.82  107.34   4
   1  -4   0 2738.45   69.69   1
   1  -4   0 2543.87  105.71   1
  -1   4   0 2632.29   97.12   1
  -1   4   0 2664.09   96.10   1
   0  -4   0 34.9625  4.3141   4
   0  -4   0 32.9823  4.4038   1
   0  -4   0 30.0479  4.4192   1
   0  -4   0 32.5362  4.2422   7
   0   4   0 22.0505  3.8707   1
   0   4   0 24.3988  3.7982   1
  -1  -4   0 2158.81  114.67   7
  -1  -4   0 2167.03   76.98   4
  -1  -4   0 2039.06  111.77   1
  -1  -4   0 2119.47   69.63   1
   1   4   0 2102.68   88.94   1
   1   4   0 2158.20   65.03   7
   1   4   0 2143.76   82.86   1
  -2  -4   0 760.132  34.131   4
  -2  -4   0 768.892  57.600   1
  -2  -4   0 742.572  41.351   1
   2   4   0 758.113  52.113   6
   2   4   0 709.973  28.684   1
   2   4   0 684.362  37.976   1
   2   4   0 713.295  37.779   7
  -3  -4   0 6.97872 2.57038   1
  -3  -4   0 6.79535 2.73091   1
  -3  -4   0 4.48777 2.64994   4
   3   4   0 2.11076 2.21531   1
   3   4   0 4.77040 4.07992   6
   3   4   0 2.11483 2.59941   7
   3   4   0 4.33144 2.22735   1
  -4  -4   0 1653.39   95.60   1
  -4  -4   0 1680.67  142.46   4
  -4  -4   0 1623.62  118.17   1
   4   4   0 1631.19   59.57   6
   4   4   0 1686.27   69.17   1
   4   4   0 1694.41  105.83   1
   4   4   0 1764.53   89.09   7
  -5  -4   0 759.517  67.969   1
  -5  -4   0 868.958  81.873   4
  -5  -4   0 822.353  47.151   1
   5   4   0 802.501  37.311   6
   5   4   0 904.012  47.865   7
   5   4   0 823.033  59.691   1
   5   4   0 831.452  41.413   1
  -6  -4   0 192.028  15.846   1
  -6  -4   0 178.192  13.438   1
  -6  -4   0 147.047  18.851   6
   6   4   0 206.056  13.518   6
   6   4   0 172.392  15.088   1
   6   4   0 193.455  13.895   1
  -7  -4   0 3.37880 4.06549   1
  -7  -4   0 8.81211 5.83012   6
  -7  -4   0 14.8909  4.7421   1
   7   4   0 5.41286 5.27049   1
   7   4   0 8.77131 4.37011   1
   7   4   0 14.4163  6.2640   2
  -8  -4   0 6.01133 4.98385   1
  -8  -4   0 5.94557 4.24031   1
   8   4   0 3.86753 4.22512   1
   8   4   0 11.5402  5.4995   2
   8   4   0 -4.7393  4.8917   1
   8   4   0 -3.9152  5.0715   5
  -9  -4   0 171.481  20.161   1
   9   4   0 127.979  17.239   2
   9   4   0 98.2607 16.9262   5
 -10  -4   0 65.6886  9.6933   1
  10   4   0 45.5611 15.6658   2
  10  -5   0 223.076  26.666   1
 -10   5   0 249.344  22.323   1
   9  -5   0 530.257  42.358   4
   9  -5   0 583.823  50.606   1
  -9   5   0 624.548  47.622   1
  -9   5   0 523.191  34.175   1
  -9   5   0 588.600  54.569   2
   8  -5   0 4.71608 5.79990   1
   8  -5   0 6.02854 5.79666   4
  -8   5   0 -1.4407  5.0797   1
  -8   5   0 5.55357 7.41337   1
  -8   5   0 0.26517 3.61998   2
   7  -5   0 59.1968  8.7249   1
   7  -5   0 76.8006  7.6404   4
   7  -5   0 77.4600 12.4040   1
  -7   5   0 90.9130 11.1461   1
  -7   5   0 78.2222 14.5115   1
  -7   5   0 68.8704  6.0738   5
   6  -5   0 110.814  13.632   1
   6  -5   0 100.548   8.839   1
   6  -5   0 104.460  13.089   4
  -6   5   0 78.2131 12.0291   1
  -6   5   0 109.170  11.651   1
   5  -5   0 139.417  13.792   1
   5  -5   0 138.938  14.707   1
   5  -5   0 142.361  13.176   4
  -5   5   0 169.007  13.775   1
  -5   5   0 156.758  11.158   1
   4  -5   0 690.363  45.462   1
   4  -5   0 661.008  31.374   1
   4  -5   0 681.465  30.074   4
  -4   5   0 696.910  43.984   1
  -4   5   0 682.848  34.076   1
   3  -5   0 480.100  32.664   1
   3  -5   0 480.520  38.412   4
   3  -5   0 441.006  15.954   1
  -3   5   0 492.128  16.846   1
  -3   5   0 536.449  31.278   1
   2  -5   0 3.40966 3.98986   1
   2  -5   0 1.40691 2.93211   4
   2  -5   0 -9.8224  3.9399   1
  -2   5   0 -1.5225  4.0913   1
  -2   5   0 0.49246 3.76387   1
   1  -5   0 103.857   8.258   4
   1  -5   0 108.095   7.445   1
   1  -5   0 96.6624  8.2380   1
  -1   5   0 108.215   8.598   1
  -1   5   0 116.300   7.880   1
   0  -5   0 2795.73   79.25   1
   0  -5   0 2722.73   83.65   4
   0  -5   0 2641.60  109.54   7
   0  -5   0 2667.85  104.20   1
   0   5   0 2899.11  107.85   1
   0   5   0 2598.92  114.90   1
  -1  -5   0 28.0701  4.9673   1
  -1  -5   0 22.9041  6.0657   7
  -1  -5   0 27.4562  4.5674   4
  -1  -5   0 24.1582  4.2008   1
   1   5   0 34.1631  4.5218   1
   1   5   0 23.5780  4.5238   1
  -2  -5   0 47.8105  6.7995   1
  -2  -5   0 48.9510  4.2973   1
  -2  -5   0 43.6872  6.7365   4
   2   5   0 40.1869  6.2785   7
   2   5   0 41.9910  5.1556   1
   2   5   0 42.3347  5.2502   6
   2   5   0 41.0616  4.8864   1
  -3  -5   0 617.267  34.728   1
  -3  -5   0 677.791  41.069   4
  -3  -5   0 728.413  45.464   1
   3   5   0 648.634  27.435   1
   3   5   0 647.057  28.747   1
   3   5   0 633.490  55.519   7
   3   5   0 687.662  29.983   6
  -4  -5   0 3.87717 3.08676   1
  -4  -5   0 3.18419 2.98757   4
  -4  -5   0 0.36360 2.65429   1
   4   5   0 -5.6987  3.7956   7
   4   5   0 0.63390 3.73200   1
   4   5   0 -0.0734  3.7167   1
   4   5   0 3.44284 4.02567   6
  -5  -5   0 699.704  56.285   1
  -5  -5   0 755.182  64.418   4
  -5  -5   0 711.574  74.172   1
   5   5   0 722.360  59.514   1
   5   5   0 726.798  71.489   7
   5   5   0 750.808  34.563   1
   5   5   0 703.520  38.975   6
  -6  -5   0 298.311  24.979   1
  -6  -5   0 309.644  25.089   1
   6   5   0 299.705  20.287   1
   6   5   0 345.051  29.119   7
   6   5   0 341.876  24.841   1
   6   5   0 295.772  22.382   6
  -7  -5   0 5.50052 3.25230   1
  -7  -5   0 7.29258 5.46647   1
   7   5   0 6.07235 5.06421   1
   7   5   0 8.94691 5.56302   1
  -8  -5   0 5.52532 3.78741   1
   8   5   0 11.6271  6.7496   2
   8   5   0 -0.2191  4.1051   1
  -9  -5   0 13.0025  6.3477   1
   9   5   0 19.9687  9.4115   2
  10  -6   0 188.357  21.611   1
 -10   6   0 231.732  28.212   1
   9  -6   0 197.089  15.594   1
   9  -6   0 206.190  21.991   3
   9  -6   0 135.108  16.194   4
  -9   6   0 216.266  20.379   1
  -9   6   0 143.005  18.299   2
   8  -6   0 102.189   9.862   4
   8  -6   0 120.616  12.623   3
   8  -6   0 91.5468 14.0542   1
  -8   6   0 105.622  12.478   1
  -8   6   0 99.0364 13.2598   1
   7  -6   0 28.9891  8.5549   1
   7  -6   0 27.6696  7.7027   4
   7  -6   0 21.7066  2.4023   3
   7  -6   0 41.1466  8.6689   1
  -7   6   0 42.9590  9.1929   1
  -7   6   0 23.5922  9.5136   1
   6  -6   0 10.1357  8.4495   1
   6  -6   0 25.9968  7.0956   4
   6  -6   0 37.3042  7.2797   1
  -6   6   0 43.8125 10.7348   1
  -6   6   0 21.3134  6.8104   1
   5  -6   0 186.735  21.146   4
   5  -6   0 199.795  14.950   1
   5  -6   0 233.740  15.888   1
  -5   6   0 204.226  17.459   1
  -5   6   0 191.137  16.571   1
   4  -6   0 43.3237  6.1030   4
   4  -6   0 39.2111  6.8683   1
   4  -6   0 49.7565  6.6132   1
  -4   6   0 33.5427  6.9328   1
  -4   6   0 30.9766  6.4114   1
   3  -6   0 305.717  25.195   1
   3  -6   0 294.396  18.694   4
   3  -6   0 283.282  17.265   1
  -3   6   0 274.253  19.763   1
  -3   6   0 292.408  16.921   1
   2  -6   0 6.62234 3.57307   1
   2  -6   0 7.74752 3.93492   1
   2  -6   0 9.74727 5.30233   4
  -2   6   0 8.36000 3.76944   1
  -2   6   0 4.09225 3.88027   1
   1  -6   0 747.114  42.206   1
   1  -6   0 764.733  45.158   7
   1  -6   0 787.004  39.148   1
   1  -6   0 774.213  41.321   4
  -1   6   0 849.389  48.492   1
  -1   6   0 759.508  58.785   1
  -1   6   0 772.246  37.661   3
   0  -6   0 7.78509 3.37487   1
   0  -6   0 7.93734 3.17615   7
   0  -6   0 5.82707 3.17230   1
   0  -6   0 16.3239  5.1679   4
   0   6   0 8.91900 4.39079   1
   0   6   0 8.63795 4.15072   1
  -1  -6   0 41.6737  5.4506   1
  -1  -6   0 35.0089  5.5093   4
  -1  -6   0 29.1781  5.3292   7
  -1  -6   0 40.4360  5.4456   1
   1   6   0 44.4712  6.0462   1
   1   6   0 27.0911  4.3024   1
  -2  -6   0 128.535   9.860   1
  -2  -6   0 110.514   9.497   1
  -2  -6   0 103.446   8.994   4
   2   6   0 98.2597  9.5437   1
   2   6   0 123.162  11.891   6
   2   6   0 93.8550  9.4412   1
   2   6   0 98.6998 10.3160   7
  -3  -6   0 594.802  46.591   1
  -3  -6   0 557.014  32.477   1
  -3  -6   0 653.916  43.946   4
   3   6   0 566.665  44.230   1
   3   6   0 630.511  31.305   6
   3   6   0 593.803  54.332   7
   3   6   0 589.003  43.993   1
  -4  -6   0 343.605  19.657   1
  -4  -6   0 318.703  32.657   1
  -4  -6   0 342.340  46.017   4
   4   6   0 318.139  26.096   6
   4   6   0 302.350  26.767   7
   4   6   0 366.730  16.564   1
   4   6   0 340.077  15.156   1
  -5  -6   0 289.941  26.858   4
  -5  -6   0 279.132  28.902   1
  -5  -6   0 317.259  18.531   1
   5   6   0 261.061  27.813   6
   5   6   0 249.930  32.193   7
   5   6   0 275.047  14.411   1
   5   6   0 269.841  21.983   1
  -6  -6   0 6.35007 4.54164   1
  -6  -6   0 3.53475 3.93374   1
   6   6   0 -1.7984  5.3560   1
   6   6   0 -4.3221  6.5822   6
   6   6   0 5.13510 4.55850   1
  -7  -6   0 30.5397  6.2179   1
   7   6   0 17.8821  8.1062   6
   7   6   0 7.67358 5.09082   1
  -8  -6   0 2.60377 5.00376   1
   8   6   0 6.66848 7.66190   2
   9  -7   0 9.63537 9.76374   1
  -9   7   0 18.8890 13.6362   1
   8  -7   0 115.086  12.617   4
   8  -7   0 148.646  17.460   1
  -8   7   0 116.595  23.671   5
  -8   7   0 150.565  18.708   1
   7  -7   0 133.341  15.597   1
   7  -7   0 88.7542 13.4841   4
  -7   7   0 104.909  16.690   1
   6  -7   0 406.400  29.636   4
   6  -7   0 401.474  39.715   1
   6  -7   0 422.274  36.780   1
  -6   7   0 439.828  51.598   1
  -6   7   0 462.012  35.580   1
   5  -7   0 6.13423 8.60080   1
   5  -7   0 2.64240 6.20576   1
   5  -7   0 -1.5152  4.9328   4
  -5   7   0 -7.6414  4.0830   1
  -5   7   0 3.07514 8.67466   1
   4  -7   0 290.523  27.037   4
   4  -7   0 286.265  21.189   1
   4  -7   0 284.725  26.553   1
  -4   7   0 302.116  28.346   1
  -4   7   0 268.131  21.510   1
   3  -7   0 293.621  24.156   1
   3  -7   0 261.780  23.815   4
   3  -7   0 295.385  25.212   1
  -3   7   0 276.552  26.063   1
  -3   7   0 305.322  24.069   1
   2  -7   0 260.780  17.831   1
   2  -7   0 244.276  28.305   4
   2  -7   0 234.786  18.755   1
   2  -7   0 262.869  21.984   7
  -2   7   0 270.326  17.254   1
  -2   7   0 235.513  24.592   1
   1  -7   0 44.1973  8.6602   4
   1  -7   0 46.1527  5.7920   1
   1  -7   0 46.8240  8.3642   1
  -1   7   0 41.2913  3.4996   3
  -1   7   0 26.7431  5.7203   1
  -1   7   0 43.4005  9.6240   1
   0  -7   0 552.866  48.838   7
   0  -7   0 483.421  35.072   4
   0  -7   0 499.045  41.919   1
   0  -7   0 517.416  35.490   1
   0   7   0 499.806  33.294   1
   0   7   0 516.375  43.017   1
  -1  -7   0 1743.70  128.54   4
  -1  -7   0 1880.93  132.22   1
  -1  -7   0 1764.89  140.38   1
  -1  -7   0 1867.02   96.18   7
   1   7   0 1744.78  124.30   1
   1   7   0 1814.21  131.22   1
  -2  -7   0 697.368  67.408   1
  -2  -7   0 674.493  56.535   4
  -2  -7   0 659.954  40.376   1
   2   7   0 631.716  54.742   6
   2   7   0 640.933  69.267   1
   2   7   0 748.104  33.680   1
  -3  -7   0 494.864  29.151   1
  -3  -7   0 467.835  25.659   4
  -3  -7   0 488.035  45.010   1
   3   7   0 486.437  31.954   6
   3   7   0 482.859  35.769   7
   3   7   0 542.713  48.532   1
   3   7   0 529.723  47.240   1
  -4  -7   0 7.14155 5.20193   1
  -4  -7   0 7.54434 4.40905   1
  -4  -7   0 1.46163 4.83002   4
   4   7   0 10.6166  6.9970   6
   4   7   0 20.5216  9.2267   7
   4   7   0 3.60382 4.53608   1
   4   7   0 -5.4909  5.0411   1
  -5  -7   0 12.4135  5.5185   1
  -5  -7   0 6.58268 6.26716   4
  -5  -7   0 13.2611  4.8233   1
   5   7   0 12.5133  5.4380   1
   5   7   0 17.4014  8.6188   6
   5   7   0 15.6629  5.1044   1
  -6  -7   0 8.78911 4.90035   4
  -6  -7   0 9.38320 4.07918   1
   6   7   0 -4.7231  6.7638   1
   6   7   0 7.86624 7.07529   6
  -7  -7   0 -8.5725  5.1994   1
   7   7   0 -4.9015  8.7478   6
   9  -8   0 243.844  32.940   1
  -9   8   0 226.359  24.530   1
   8  -8   0 3.94684 7.21645   1
  -8   8   0 37.4988  9.8992   1
   7  -8   0 36.4593 12.0161   1
  -7   8   0 69.8686 12.8856   1
   6  -8   0 543.500  66.738   4
   6  -8   0 554.366  61.135   1
  -6   8   0 639.962  57.043   1
   5  -8   0 48.6923 11.4101   4
   5  -8   0 51.2107 12.4432   1
   5  -8   0 75.2024 13.9566   1
  -5   8   0 46.2732 10.6893   1
   4  -8   0 278.948  26.003   4
   4  -8   0 361.552  29.019   1
   4  -8   0 314.386  26.896   1
  -4   8   0 309.369  21.160   1
  -4   8   0 296.043  26.633   1
   3  -8   0 41.9924  7.9988   4
   3  -8   0 53.4287  9.5143   1
   3  -8   0 35.5884  8.7036   1
  -3   8   0 32.9097  7.3937   1
  -3   8   0 32.4109  8.0396   1
   2  -8   0 815.441  70.806   1
   2  -8   0 725.096  69.302   7
   2  -8   0 735.934  59.129   1
   2  -8   0 680.360  45.497   4
  -2   8   0 663.268  68.787   1
  -2   8   0 752.946  62.283   1
   1  -8   0 0.14143 3.10157   1
   1  -8   0 -2.6309  4.9838   1
   1  -8   0 13.0295  7.5037   4
   1  -8   0 2.31093 3.64382   7
  -1   8   0 11.4802  4.9735   1
  -1   8   0 7.35248 2.67628   3
  -1   8   0 8.38995 5.59815   1
   0  -8   0 353.151  31.399   1
   0  -8   0 337.251  35.173   7
   0  -8   0 332.578  36.663   4
   0  -8   0 275.681  29.684   1
   0   8   0 322.506  22.765   1
   0   8   0 370.816  37.806   1
  -1  -8   0 595.881  64.146   7
  -1  -8   0 815.028  58.271   4
  -1  -8   0 747.351  54.425   1
  -1  -8   0 783.748  56.446   1
   1   8   0 718.950  57.651   1
   1   8   0 747.690  59.322   1
  -2  -8   0 -3.0127  5.9026   4
  -2  -8   0 7.62470 6.30135   1
  -2  -8   0 -3.8833  3.1910   1
   2   8   0 -2.3477  7.3443   6
   2   8   0 8.17382 6.74967   1
   2   8   0 2.04538 4.52699   1
  -3  -8   0 -0.1863  6.1858   4
  -3  -8   0 4.78518 4.37365   1
  -3  -8   0 -5.6467  4.8805   1
   3   8   0 0.83613 4.83854   1
   3   8   0 -0.2630  6.0329   1
   3   8   0 13.4628  9.0138   6
  -4  -8   0 29.2945  6.3864   1
  -4  -8   0 22.7184  4.7767   1
  -4  -8   0 6.27564 6.12243   4
   4   8   0  5.4689 11.3930   6
   4   8   0 16.8587  5.3775   1
   4   8   0 21.2721  6.1518   1
  -5  -8   0 10.5738  8.1555   4
  -5  -8   0 41.4225  7.2777   1
   5   8   0 23.6633  9.5934   6
  -6  -8   0 1.51665 4.79432   1
   6   8   0 13.1866  9.4807   6
   8  -9   0 -1.1705  8.0582   1
  -8   9   0  2.0002 10.5638   1
   7  -9   0 13.6979  8.5303   1
  -7   9   0 24.8378 10.5313   1
   6  -9   0 28.9454  9.8603   1
  -6   9   0 19.9299 10.9175   1
   5  -9   0 144.242  18.074   1
  -5   9   0 156.421  19.841   1
   4  -9   0 392.039  55.246   1
   4  -9   0 496.186  43.123   1
  -4   9   0 484.276  35.907   1
   3  -9   0 104.088  14.465   7
   3  -9   0 68.0651 11.0369   1
   3  -9   0 88.8211 15.7423   1
  -3   9   0 80.4308 14.1906   1
   2  -9   0 33.3392  7.7073   7
   2  -9   0 24.8312  8.0792   1
   2  -9   0 21.7684  7.8369   1
  -2   9   0 38.5776 11.0559   1
   1  -9   0 1.10709 5.17184   1
   1  -9   0 2.17774 6.46310   1
   1  -9   0 6.76608 5.20836   7
  -1   9   0 -3.2171  4.5597   1
  -1   9   0 4.33649 3.39160   3
   0  -9   0 132.884  14.569   1
   0  -9   0 107.812  14.018   7
   0  -9   0 85.3054 12.4901   1
   0   9   0 114.254  15.396   1
   0   9   0 115.821  11.971   3
  -1  -9   0 284.642  27.767   1
  -1  -9   0 275.329  26.941   7
  -1  -9   0 254.797  23.682   1
   1   9   0 253.120  26.288   6
   1   9   0 190.302  30.260   1
  -2  -9   0 5.17655 5.88444   1
  -2  -9   0 -0.6754  4.2327   1
   2   9   0 3.57848 5.81127   6
   2   9   0 6.92979 5.06237   1
  -3  -9   0 94.0590 11.7415   1
   3   9   0 97.6689 15.5660   6
  -4  -9   0 255.991  28.966   1
   4   9   0 279.957  40.851   6
  -5  -9   0 1.61919 5.07825   1
   5   9   0 13.6240 15.3558   6
   6 -10   0  6.5697 11.6174   1
  -6  10   0  6.0359 14.1278   1
   5 -10   0 134.871  22.347   1
  -5  10   0 82.8986 14.3925   1
   4 -10   0 128.158  18.231   1
   4 -10   0 126.283  20.018   7
  -4  10   0 120.499  21.770   1
   3 -10   0 0.65233 6.23232   1
   3 -10   0 -1.4347  7.7122   1
   3 -10   0 2.75945 5.41235   7
  -3  10   0  1.6866 10.1553   1
   2 -10   0 179.924  28.303   7
   2 -10   0 148.395  28.063   1
   2 -10   0 184.525  26.229   1
  -2  10   0 157.002  20.225   1
   1 -10   0 158.149  22.413   1
   1 -10   0 163.022  21.903   7
   1 -10   0 152.331  20.887   1
  -1  10   0 182.971  22.061   1
   0 -10   0 226.357  28.940   7
   0 -10   0 252.814  26.565   1
   0  10   0 234.885  25.734   3
   0  10   0 290.324  30.558   1
  -1 -10   0 0.28160 4.37092   1
  -1 -10   0 0.88095 6.06269   7
   1  10   0 8.50421 7.78386   6
   1  10   0 4.82421 7.18320   3
  -2 -10   0 -1.7686  4.5444   1
   2  10   0 -2.6155  7.9440   6
  -3 -10   0 11.9838  5.5654   1
   3  10   0 19.2118 13.6203   6
  -4  11   0  4.9077 15.9525   1
   3 -11   0  3.8741 11.7012   1
   3 -11   0 2.24659 6.74551   7
  -3  11   0 -2.1042 11.5444   1
   2 -11   0 33.6092 11.9972   7
   2 -11   0 55.2255 10.9672   1
  -2  11   0 18.3460  9.8006   1
   1 -11   0 6.19565 7.56152   1
   1 -11   0 14.5663  9.9111   7
   0 -11   0 80.3871 17.0256   7
   0 -11   0 103.478  15.611   1
   0  11   0 88.7310 15.3838   6
   2  10  -1 0.03973 8.73345   6
  -2 -10   1 7.40962 8.42415   1
   1  10  -1 23.9193 10.3969   6
  -1 -10   1 29.4838  9.2571   1
   0  10  -1 303.580  33.671   6
   0  10  -1 247.948  34.049   1
   0 -10   1 297.759  46.335   1
   0 -10   1 261.028  34.912   7
  -1  10  -1 -0.1848  7.8302   1
   1 -10   1 -0.0716  4.8831   1
   1 -10   1 0.18237 5.98808   7
  -2  10  -1 6.87319 7.37462   1
   2 -10   1 0.18116 6.60508   7
   2 -10   1 10.0827  9.8808   1
   2 -10   1 4.09987 6.32395   1
  -3  10  -1  4.6282 11.6089   1
   3 -10   1 4.98855 9.83867   1
   3 -10   1 6.31485 5.11469   7
  -4  10  -1 21.4933 13.8858   1
   4 -10   1 1.55047 6.80936   7
   4 -10   1 1.81407 7.21924   1
  -5  10  -1 8.13270 8.94600   1
   5 -10   1 4.68735 6.46992   7
   5 -10   1 22.6162  9.9210   1
  -6  10  -1 84.5345 13.3277   1
   6 -10   1 116.440  21.264   1
   4   9  -1 46.2484 12.3807   6
  -4  -9   1 39.2044  9.0275   1
   3   9  -1 167.286  23.412   6
  -3  -9   1 140.781  16.619   1
   2   9  -1 -0.5119  7.9937   6
   2   9  -1 -0.4517  8.1846   1
  -2  -9   1 -2.3759  5.6543   1
   1   9  -1 -9.9759  7.1942   1
   1   9  -1 1.43810 8.44167   6
  -1  -9   1 7.38625 4.75302   1
  -1  -9   1 -3.4386  6.2685   1
   0   9  -1 185.389  22.195   1
   0   9  -1 195.838  21.774   6
   0  -9   1 162.033  20.471   7
   0  -9   1 175.661  27.193   1
   0  -9   1 161.801  22.587   1
  -1   9  -1 109.890  16.578   3
  -1   9  -1 111.861  15.995   1
   1  -9   1 79.5635 14.1018   1
   1  -9   1 108.468  18.060   7
   1  -9   1 119.216  19.476   1
  -2   9  -1 2.99960 7.28280   1
   2  -9   1 6.94365 5.39554   1
   2  -9   1 17.5319  9.0475   1
   2  -9   1 3.34862 5.74305   7
  -3   9  -1 4.40790 6.88084   1
   3  -9   1 5.83572 7.27733   1
   3  -9   1 0.82363 4.82986   7
   3  -9   1 3.93771 8.12079   1
  -4   9  -1 49.1286 12.7569   1
   4  -9   1 41.3334 10.2748   1
   4  -9   1 52.9298 12.9885   1
   4  -9   1 49.0531  8.6959   7
  -5   9  -1 7.36991 8.58296   1
   5  -9   1 14.7014  8.2257   1
  -6   9  -1 157.924  20.259   1
   6  -9   1 186.018  19.144   1
  -7   9  -1 50.2631 10.8522   1
   7  -9   1 36.4876 12.1612   1
   5   8  -1 98.2267 17.9205   6
  -5  -8   1 79.1775 14.0878   1
   4   8  -1 12.2035  8.4941   6
  -4  -8   1 15.0686  6.0204   1
  -4  -8   1 22.0150  7.2976   4
   3   8  -1 231.634  25.256   1
   3   8  -1 235.550  25.656   6
  -3  -8   1 222.961  22.709   4
  -3  -8   1 256.906  20.814   1
  -3  -8   1 228.170  30.003   1
   2   8  -1 22.0849  7.8114   1
   2   8  -1 29.5222  8.0491   6
  -2  -8   1 13.5228  5.0352   1
  -2  -8   1 24.8545  9.2005   4
  -2  -8   1 29.2247  9.0108   1
   1   8  -1 117.266  15.448   1
   1   8  -1 130.911  15.738   6
   1   8  -1 141.376  16.012   1
  -1  -8   1 160.104  19.715   4
  -1  -8   1 139.537  14.385   1
  -1  -8   1 170.043  22.246   7
  -1  -8   1 143.500  13.692   1
   0   8  -1 206.117  19.150   1
   0   8  -1 180.731  14.237   1
   0  -8   1 200.768  15.562   1
   0  -8   1 191.213  22.295   1
   0  -8   1 182.185  23.498   7
   0  -8   1 202.844  17.980   4
  -1   8  -1 47.7660  9.9317   1
  -1   8  -1 56.8673 11.6951   1
   1  -8   1 63.7015  8.8590   7
   1  -8   1 38.9220  8.7880   4
   1  -8   1 59.0126  9.0939   1
   1  -8   1 52.2607  8.2127   1
  -2   8  -1 96.5829 11.6449   1
  -2   8  -1 143.780  15.550   1
  -2   8  -1 111.449   9.153   3
   2  -8   1 106.953  12.665   1
   2  -8   1 121.936  15.116   7
   2  -8   1 111.191  19.987   1
   2  -8   1 69.3498 13.3831   4
  -3   8  -1 132.087  16.809   1
   3  -8   1 129.070  16.103   1
   3  -8   1 101.636  15.900   1
   3  -8   1 96.6498 13.5874   7
  -4   8  -1 10.5511  9.4073   1
   4  -8   1 5.97292 8.62475   1
   4  -8   1 19.1283 10.1932   1
  -5   8  -1 459.566  32.597   1
   5  -8   1 415.820  41.294   1
   5  -8   1 418.571  47.876   1
  -6   8  -1 4.60264 8.01878   1
   6  -8   1 0.18067 7.50653   1
  -7   8  -1 44.4745 10.5768   1
   7  -8   1 84.8435 14.4113   1
  -8   8  -1 46.3803 16.5405   1
   8  -8   1 40.2068 13.4292   1
  -9   8  -1 11.5411  9.1534   1
   9  -8   1 6.95278 9.73931   1
  -7  -7   1 -9.2930  5.7891   1
   6   7  -1 -8.9435  7.7099   6
  -6  -7   1 3.00647 6.31973   1
   5   7  -1 58.1500 14.4034   6
   5   7  -1 81.2057 16.0603   1
  -5  -7   1 77.6023 12.1156   1
  -5  -7   1 57.8155 10.4808   4
   4   7  -1 521.639  43.613   6
   4   7  -1 505.539  48.338   1
   4   7  -1 442.151  36.556   1
   4   7  -1 440.119  35.014   7
  -4  -7   1 505.977  33.684   4
  -4  -7   1 513.171  38.533   1
  -4  -7   1 525.554  51.778   1
   3   7  -1 19.0577  5.4858   6
   3   7  -1 24.7213  6.3888   1
   3   7  -1 21.4693  7.7514   1
   3   7  -1 11.4077  5.6807   7
  -3  -7   1 20.5398  6.1240   1
  -3  -7   1 25.8794  6.2574   1
  -3  -7   1 23.0593  7.9015   4
   2   7  -1 578.133  49.440   6
   2   7  -1 601.189  53.174   1
   2   7  -1 556.349  31.025   1
  -2  -7   1 572.473  43.291   1
  -2  -7   1 507.323  35.199   1
  -2  -7   1 538.711  37.567   4
   1   7  -1 404.825  35.776   6
   1   7  -1 384.048  43.097   1
   1   7  -1 405.952  40.890   1
  -1  -7   1 424.910  44.128   1
  -1  -7   1 421.407  31.195   4
  -1  -7   1 427.272  39.530   7
  -1  -7   1 461.908  31.832   1
   0   7  -1 2.07660 5.15871   1
   0   7  -1 -2.0163  3.1250   1
   0  -7   1 7.06124 5.84449   4
   0  -7   1 6.96810 6.00883   1
   0  -7   1 6.64647 3.92196   1
   0  -7   1 2.47078 3.32712   7
  -1   7  -1 6.61724 4.60537   1
  -1   7  -1 -1.8801  4.5895   1
   1  -7   1 3.49096 6.73877   4
   1  -7   1 1.91431 4.17912   7
   1  -7   1 0.37534 4.56738   1
   1  -7   1 -2.4943  3.5204   1
  -2   7  -1 1.23039 1.45938   3
  -2   7  -1 2.62440 5.19575   1
  -2   7  -1 16.1668  5.0709   1
   2  -7   1 2.83981 4.19537   1
   2  -7   1 11.0123  5.1270   4
   2  -7   1 -1.2627  3.8074   1
   2  -7   1 4.19002 3.33685   7
  -3   7  -1 17.7838  5.1991   1
  -3   7  -1 12.6232  5.5028   1
   3  -7   1 14.1274  6.1178   4
   3  -7   1 10.0955  4.1507   1
   3  -7   1 7.01733 6.20895   1
  -4   7  -1 29.8768  8.1630   1
  -4   7  -1 19.6545  7.9426   1
   4  -7   1 34.3978  7.8574   1
   4  -7   1 26.8385  7.7068   4
   4  -7   1 16.5850  6.2564   1
  -5   7  -1 2036.10  123.16   1
  -5   7  -1 1928.58  147.65   1
   5  -7   1 2128.15  154.09   1
   5  -7   1 1939.77  179.78   1
   5  -7   1 2055.12  203.35   4
  -6   7  -1 17.5353  8.4521   1
  -6   7  -1 11.1103  8.0425   1
   6  -7   1 5.18034 5.77646   1
   6  -7   1 18.3835  7.8171   1
   6  -7   1 4.20221 5.10797   4
  -7   7  -1 138.790  16.465   1
   7  -7   1 160.358  23.307   1
   7  -7   1 91.6429 13.0797   4
  -8   7  -1 -8.8657 10.6656   1
   8  -7   1 22.4310 11.6189   1
   8  -7   1 2.36019 9.79883   4
  -9   7  -1 21.6181  8.7774   1
   9  -7   1 11.3002  8.8787   1
   8   6  -1 145.647  34.185   2
  -8  -6   1 162.340  21.637   1
  -7  -6   1 0.90522 3.91946   1
   6   6  -1 2.89061 7.23089   6
  -6  -6   1 11.3440  5.2778   1
  -6  -6   1 4.16557 5.46499   1
  -6  -6   1 2.90187 4.00215   4
   5   6  -1 17.3686  6.9101   1
   5   6  -1 23.9137  8.7296   6
   5   6  -1 32.0174  7.4004   1
   5   6  -1 20.9081  7.9883   7
  -5  -6   1 42.5943  6.4472   1
  -5  -6   1 35.2034  8.2327   1
  -5  -6   1 36.9334  7.6327   4
   4   6  -1 230.627  14.900   1
   4   6  -1 251.542  17.481   6
   4   6  -1 245.566  19.191   1
   4   6  -1 259.126  23.393   7
  -4  -6   1 258.748  19.724   1
  -4  -6   1 216.664  20.752   1
  -4  -6   1 258.769  21.038   4
   3   6  -1 -3.5996  4.0777   6
   3   6  -1 3.71086 3.43073   1
   3   6  -1 -1.8392  6.2581   7
   3   6  -1 2.10733 3.96970   1
  -3  -6   1 1.07555 3.15121   1
  -3  -6   1 1.27577 2.81024   1
  -3  -6   1 3.47056 5.72216   4
   2   6  -1 1184.97   54.79   1
   2   6  -1 1290.97   90.96   6
   2   6  -1 1255.43  110.33   1
  -2  -6   1 1282.12  101.77   1
  -2  -6   1 1191.93   88.36   1
  -2  -6   1 1191.53  107.56   4
   1   6  -1 1051.95   76.64   1
   1   6  -1 1116.12   63.87   1
   1   6  -1 1116.84   59.75   6
  -1  -6   1 1120.49   57.75   1
  -1  -6   1 1107.06   84.25   4
  -1  -6   1 1074.04   91.32   1
  -1  -6   1 1081.10   77.36   7
   0   6  -1 200.897  18.354   1
   0   6  -1 211.814  12.626   1
   0  -6   1 219.303  18.676   4
   0  -6   1 217.763  10.537   1
   0  -6   1 208.233  17.363   7
   0  -6   1 237.324  21.332   1
  -1   6  -1 260.185  19.306   1
  -1   6  -1 228.856  21.560   1
   1  -6   1 271.340  22.352   4
   1  -6   1 260.862  19.958   1
   1  -6   1 244.777  20.207   7
   1  -6   1 204.697  14.627   1
  -2   6  -1 4.67666 3.57765   1
  -2   6  -1 2.77462 1.12014   3
  -2   6  -1 1.36163 3.01862   1
   2  -6   1 -2.5886  3.5485   4
   2  -6   1 8.61625 4.55019   1
   2  -6   1 6.48191 4.38394   1
  -3   6  -1 10.4315  5.3540   1
  -3   6  -1 14.9040  5.2416   1
   3  -6   1 14.7156  4.6053   1
   3  -6   1 6.46764 3.96745   1
   3  -6   1 9.24006 4.44161   4
  -4   6  -1 203.036  22.498   1
  -4   6  -1 163.346  11.572   1
   4  -6   1 211.150  20.461   1
   4  -6   1 190.261  17.721   1
   4  -6   1 184.418  22.775   4
  -5   6  -1 92.5081 13.4250   1
  -5   6  -1 93.4434 12.1588   1
   5  -6   1 110.820  12.734   1
   5  -6   1 78.1349 10.7786   4
   5  -6   1 96.5108 11.6126   1
  -6   6  -1 7.78253 5.54643   1
  -6   6  -1 23.4284  8.1735   1
   6  -6   1 11.5382  5.4667   4
   6  -6   1 6.95219 6.75419   1
   6  -6   1 15.8849  6.4359   1
  -7   6  -1 178.491  25.183   1
  -7   6  -1 161.334  17.967   1
   7  -6   1 203.454  18.810   1
   7  -6   1 150.757  21.481   1
   7  -6   1 174.058  18.664   4
  -8   6  -1 4.03397 6.78258   1
  -8   6  -1 4.01508 9.25051   1
   8  -6   1 9.35183 5.89003   4
   8  -6   1 6.83880 8.76501   1
  -9   6  -1 -0.0740  6.7110   1
  -9   6  -1 6.37319 6.23948   2
   9  -6   1 6.08661 5.44967   4
   9  -6   1 2.06838 7.21831   1
 -10   6  -1 26.4958  9.1228   1
  10  -6   1 10.9720  8.8753   1
   8   5  -1 75.8106 14.8934   2
  -8  -5   1 99.0283 11.6300   1
   7   5  -1 17.7756  6.8284   1
  -7  -5   1 12.4328  7.0397   1
  -7  -5   1 17.6743  7.0593   1
   6   5  -1 36.0984  9.4302   7
   6   5  -1 49.0079  7.9368   1
   6   5  -1 37.6941  6.5943   1
  -6  -5   1 39.0358  7.0878   4
  -6  -5   1 51.9350  7.3078   1
  -6  -5   1 34.2151  6.1141   1
   5   5  -1 -2.3146  3.3824   1
   5   5  -1 10.9301  7.5055   7
   5   5  -1 1.83790 6.26389   6
   5   5  -1 1.07319 3.70418   1
  -5  -5   1 2.14087 5.24373   1
  -5  -5   1 3.18135 2.80202   1
  -5  -5   1 7.42948 3.99218   4
   4   5  -1 2746.02  180.83   7
   4   5  -1 2816.45  189.49   1
   4   5  -1 2759.21  117.49   1
   4   5  -1 2716.94  180.40   6
  -4  -5   1 2836.24  263.52   1
  -4  -5   1 2686.21  144.28   1
  -4  -5   1 2868.31  160.38   4
   3   5  -1 168.176  11.470   6
   3   5  -1 157.040  15.906   7
   3   5  -1 172.584  11.044   1
   3   5  -1 156.072  13.044   1
  -3  -5   1 163.847  13.846   4
  -3  -5   1 169.455  14.172   1
  -3  -5   1 176.625  15.637   1
   2   5  -1 19.1676  5.5617   6
   2   5  -1 13.2832  3.8530   1
   2   5  -1 23.3663  5.6793   7
  -2  -5   1 18.9668  4.7328   1
  -2  -5   1 15.7644  3.6043   1
  -2  -5   1 25.3887  5.5035   4
   1   5  -1 40.1400  4.9283   6
   1   5  -1 32.7982  4.5573   1
   1   5  -1 37.4609  6.6854   1
  -1  -5   1 42.0141  5.4649   1
  -1  -5   1 54.4964  6.7629   7
  -1  -5   1 43.3625  6.9739   1
  -1  -5   1 29.7305  6.1541   4
   0   5  -1 16.7262  4.8571   1
   0   5  -1 10.1326  3.5222   1
   0  -5   1 11.5264  3.9213   4
   0  -5   1 10.3467  3.8125   7
   0  -5   1 5.15805 3.72646   1
   0  -5   1 8.69356 3.22727   1
  -1   5  -1 402.670  19.395   1
  -1   5  -1 383.864  24.362   1
   1  -5   1 365.603  21.470   1
   1  -5   1 419.545  25.347   7
   1  -5   1 418.189  19.395   1
   1  -5   1 412.666  20.550   4
  -2   5  -1 1091.85   39.11   1
  -2   5  -1 1094.09   39.98   1
   2  -5   1 1063.76   44.90   1
   2  -5   1 1100.51   53.00   1
  -3   5  -1 216.148  12.581   1
  -3   5  -1 250.205  16.673   1
   3  -5   1 206.124  11.036   1
   3  -5   1 214.402  13.942   1
  -4   5  -1 156.937  12.152   1
  -4   5  -1 136.009  10.438   1
   4  -5   1 150.368  12.886   1
   4  -5   1 133.864  10.435   1
  -5   5  -1 327.485  18.669   1
  -5   5  -1 355.075  24.716   1
   5  -5   1 337.161  18.213   1
   5  -5   1 312.857  25.439   1
  -6   5  -1 818.170  53.875   1
  -6   5  -1 827.755  58.266   1
   6  -5   1 873.416  57.127   1
   6  -5   1 827.765  67.631   4
   6  -5   1 873.777  41.094   1
  -7   5  -1 189.965  17.215   1
  -7   5  -1 208.993  28.143   1
   7  -5   1 195.669  22.894   3
   7  -5   1 215.080  20.236   4
   7  -5   1 197.122  21.318   1
   7  -5   1 195.584  19.783   1
  -8   5  -1 24.7663 10.8697   1
  -8   5  -1 32.4332  4.6131   5
  -8   5  -1 21.0311  7.5504   1
   8  -5   1 20.3456  5.1099   4
   8  -5   1 30.0862  4.9400   3
   8  -5   1 38.4770  9.9653   1
  -9   5  -1 194.304  21.942   1
  -9   5  -1 174.633  22.075   2
  -9   5  -1 161.008  23.155   1
   9  -5   1 194.733  14.968   4
   9  -5   1 166.941  18.490   1
   9  -5   1 186.633  21.276   3
 -10   5  -1  8.7746 10.9242   1
 -10   5  -1  5.2093 21.4971   2
  10  -5   1  0.5172 11.7307   1
  10  -5   1 16.5186  5.5602   3
 -11   5  -1 357.065  33.356   1
  11  -5   1 314.204  25.599   1
   9   4  -1 -4.3299  9.5879   2
  -9  -4   1 9.96311 6.19265   1
   8   4  -1 30.2666 11.0194   2
  -8  -4   1 27.1841  6.4061   1
   7   4  -1 38.7664  5.9308   1
   7   4  -1 32.5118  6.1464   1
  -7  -4   1 35.3199  7.7072   1
  -7  -4   1 22.6969  6.0416   1
   6   4  -1 39.7672  6.0153   1
   6   4  -1 44.1088  8.5241   7
   6   4  -1 46.7900  6.2532   1
  -6  -4   1 49.2691  6.7434   1
  -6  -4   1 51.8839  8.9248   1
   5   4  -1 43.5514  4.7976   1
   5   4  -1 40.8691  9.3253   7
   5   4  -1 48.3980  6.4332   1
  -5  -4   1 52.8007  6.1258   4
  -5  -4   1 41.9473  5.8277   1
  -5  -4   1 53.6493  8.0217   1
   4   4  -1 680.180  38.497   6
   4   4  -1 676.587  45.638   7
   4   4  -1 669.353  35.765   1
   4   4  -1 623.519  20.501   1
  -4  -4   1 700.447  37.328   1
  -4  -4   1 692.999  40.397   4
  -4  -4   1 644.439  47.946   1
   3   4  -1 60.9092  6.4838   1
   3   4  -1 47.3147  6.2788   1
   3   4  -1 40.4728  5.0739   7
   3   4  -1 65.5382  7.0011   6
  -3  -4   1 67.9318  5.7689   1
  -3  -4   1 57.2445  7.4788   4
  -3  -4   1 51.8981  5.1017   1
   2   4  -1 360.747  19.923   7
   2   4  -1 339.083  23.191   6
   2   4  -1 360.136  21.088   1
   2   4  -1 333.424  23.729   1
  -2  -4   1 348.741  21.782   1
  -2  -4   1 309.710  20.012   1
  -2  -4   1 315.940  18.319   4
   1   4  -1 10.6339  2.7504   7
   1   4  -1 11.4680  3.1204   1
   1   4  -1 10.9322  3.1803   1
   1   4  -1 14.4401  3.8338   6
  -1  -4   1 19.8396  4.0024   1
  -1  -4   1 13.6170  2.9469   1
  -1  -4   1 9.54837 2.65538   4
  -1  -4   1 12.0706  2.6634   7
   0   4  -1 2709.18  131.07   1
   0   4  -1 2959.77  106.19   1
   0  -4   1 2807.93  107.91   7
   0  -4   1 2817.29  177.16   1
   0  -4   1 2861.65  145.18   1
  -1   4  -1 1851.74   55.42   1
  -1   4  -1 1804.75  125.93   1
   1  -4   1 1752.39   91.28   1
   1  -4   1 1754.28  104.01   7
   1  -4   1 1794.44   69.65   1
  -2   4  -1 3.11497 2.97821   1
  -2   4  -1 -2.7439  3.2880   1
   2  -4   1 5.35905 3.01936   1
   2  -4   1 3.37717 2.90796   1
  -3   4  -1 4429.54  216.04   1
  -3   4  -1 4615.56  123.54   1
   3  -4   1 4536.15  152.26   1
   3  -4   1 4454.73  193.62   1
  -4   4  -1 164.338  11.125   1
  -4   4  -1 112.154  11.739   1
   4  -4   1 142.472  10.296   1
   4  -4   1 150.619  15.858   1
  -5   4  -1 446.075  23.914   1
  -5   4  -1 368.606  18.263   1
   5  -4   1 403.354  26.170   3
   5  -4   1 391.900  20.972   1
   5  -4   1 361.278  21.353   1
  -6   4  -1 -0.1863  4.8668   1
  -6   4  -1 -0.7067  4.3782   1
   6  -4   1 -0.3720  1.4545   3
   6  -4   1 -9.8220  4.2563   1
   6  -4   1 10.8026  6.6074   1
  -7   4  -1 87.0603  6.8683   5
  -7   4  -1 114.314  13.349   1
  -7   4  -1 103.441  11.156   1
   7  -4   1 79.8872  9.5036   1
   7  -4   1 68.8735  8.9972   1
  -8   4  -1 574.032  47.486   1
  -8   4  -1 551.293  39.131   2
  -8   4  -1 522.730  47.442   5
  -8   4  -1 562.575  40.354   1
   8  -4   1 532.751  46.168   4
   8  -4   1 607.776  32.520   1
   8  -4   1 582.934  43.785   1
  -9   4  -1 1021.38   65.46   1
  -9   4  -1 1086.04   63.47   1
  -9   4  -1 1054.57   89.85   2
   9  -4   1 1004.21   59.07   4
   9  -4   1 1081.08   66.49   1
 -10   4  -1 -1.0912 12.8539   1
 -10   4  -1 -6.0920  7.5321   1
 -10   4  -1 3.53693 9.78025   2
  10  -4   1 0.36798 5.87227   1
 -11   4  -1 0.92615 6.96840   1
  11  -4   1 -2.0041  7.6831   1
 -10  -3   1 1.96526 6.05655   1
   9   3  -1 126.576  16.953   2
  -9  -3   1 124.956  17.067   1
   8   3  -1 5.27378 5.91888   5
   8   3  -1 9.75412 6.54287   2
   8   3  -1 10.0375  6.9604   1
  -8  -3   1 10.5820  5.5618   1
  -8  -3   1 13.5820  7.1399   1
   7   3  -1 377.674  39.111   1
   7   3  -1 400.263  45.656   1
   7   3  -1 485.213  41.586   2
  -7  -3   1 413.786  37.734   1
  -7  -3   1 387.239  40.938   6
  -7  -3   1 422.198  44.786   1
   6   3  -1 389.552  21.568   1
   6   3  -1 383.121  36.279   1
  -6  -3   1 391.582  44.285   6
  -6  -3   1 385.930  37.323   1
  -6  -3   1 345.339  22.323   1
   5   3  -1 1288.80   69.17   1
   5   3  -1 1284.95   71.00   1
  -5  -3   1 1233.63  108.23   4
  -5  -3   1 1215.00   81.13   1
  -5  -3   1 1200.29   87.45   6
  -5  -3   1 1272.74   72.03   1
   4   3  -1 17.1319  4.0781   1
   4   3  -1 14.7364  4.4969   6
   4   3  -1 18.5499  4.7667   1
  -4  -3   1 13.2011  4.4333   6
  -4  -3   1 9.41198 3.99757   1
  -4  -3   1 12.4643  2.6841   4
  -4  -3   1 6.50905 2.80273   1
   3   3  -1 3.24783 3.23710   7
   3   3  -1 1.88206 3.28387   1
   3   3  -1 7.74308 2.82511   1
   3   3  -1 6.32441 3.53333   6
  -3  -3   1 7.20003 2.04644   4
  -3  -3   1 7.39622 2.96186   1
  -3  -3   1 7.58367 3.60156   1
  -3  -3   1 1.56058 2.59195   6
   2   3  -1 6.56510 2.58911   1
   2   3  -1 8.69619 3.09741   1
   2   3  -1 5.03453 3.78827   6
   2   3  -1 12.5889  2.7146   7
  -2  -3   1 4.61002 3.16201   1
  -2  -3   1 6.02482 2.65517   4
  -2  -3   1 3.43646 2.34321   1
   1   3  -1 331.212  16.775   1
   1   3  -1 377.484  20.044   1
   1   3  -1 378.419  22.677   6
   1   3  -1 369.813  17.274   7
  -1  -3   1 390.349  18.723   1
  -1  -3   1 343.881  17.712   1
   0   3  -1 234.289  11.324   1
   0   3  -1 247.100  13.433   1
   0  -3   1 222.715  12.510   1
   0  -3   1 225.371  12.861   1
   0  -3   1 268.770  13.398   7
  -1   3  -1 309.486  10.855   1
  -1   3  -1 295.906  14.259   1
   1  -3   1 333.659  18.763   1
   1  -3   1 306.027  23.152   1
  -2   3  -1 3943.22  120.44   1
  -2   3  -1 4066.49  119.44   1
   2  -3   1 4021.84  213.36   1
   2  -3   1 3883.04  163.60   1
  -3   3  -1 806.031  34.325   1
  -3   3  -1 769.444  31.597   1
   3  -3   1 815.858  28.470   1
   3  -3   1 850.993  36.843   1
  -4   3  -1 1091.96   38.22   1
  -4   3  -1 980.210  34.423   1
   4  -3   1 1013.33   44.90   3
   4  -3   1 958.690  37.727   1
   4  -3   1 1058.41   40.55   1
  -5   3  -1 812.037  31.274   1
  -5   3  -1 750.379  28.629   1
   5  -3   1 823.520  43.185   1
   5  -3   1 797.963  39.077   1
  -6   3  -1 1096.98   62.18   5
  -6   3  -1 1016.38   47.41   1
  -6   3  -1 1133.07   71.71   1
   6  -3   1 1066.00   50.94   1
   6  -3   1 1113.90   70.14   1
  -7   3  -1 -1.2777  1.7803   5
  -7   3  -1 -0.7236  3.9674   1
  -7   3  -1 1.07248 3.86899   2
  -7   3  -1 5.07427 4.17710   1
   7  -3   1 0.19258 3.55587   1
   7  -3   1 3.61642 5.72123   1
  -8   3  -1 171.217  17.961   1
  -8   3  -1 176.782  13.621   2
  -8   3  -1 164.638  15.196   1
   8  -3   1 177.025  16.648   1
   8  -3   1 155.024  17.225   1
  -9   3  -1 551.491  41.805   1
  -9   3  -1 500.405  31.463   1
  -9   3  -1 488.741  31.659   2
   9  -3   1 511.762  34.022   4
   9  -3   1 535.515  51.391   1
 -10   3  -1 64.6219  9.0407   2
 -10   3  -1 91.5394 14.3975   1
 -10   3  -1 93.2640 13.9942   1
  10  -3   1 83.1918 10.5646   1
 -11   3  -1 24.0957  8.8384   1
  11  -3   1 25.1813  8.8619   1
  10   2  -1 79.3570 12.5039   2
 -10  -2   1 66.0764 11.5319   1
   9   2  -1 19.0064  6.5596   1
   9   2  -1 2.35240 5.08095   2
   9   2  -1 6.56969 5.83787   5
  -9  -2   1 5.45814 5.10332   1
   8   2  -1 102.340  12.240   1
   8   2  -1 139.529  16.239   2
   8   2  -1 114.308  14.670   5
   8   2  -1 144.858  18.512   1
  -8  -2   1 128.246  16.573   1
  -8  -2   1 151.578  16.138   1
   7   2  -1 18.1220  6.1513   2
   7   2  -1 12.3641  4.7929   1
   7   2  -1 11.0329  5.3673   1
  -7  -2   1 26.8548  5.7344   1
  -7  -2   1 16.7383  5.3777   1
  -7  -2   1 21.0534  9.9908   6
   6   2  -1 20.1949  5.6972   2
   6   2  -1 6.57609 2.99940   1
   6   2  -1 1.63203 2.97672   1
  -6  -2   1 11.9573  6.1456   6
  -6  -2   1 7.10195 3.13635   1
  -6  -2   1 6.56016 4.46095   1
   5   2  -1 14.5439  3.9857   1
   5   2  -1 15.9676  3.9178   1
  -5  -2   1 11.4589  3.0594   1
  -5  -2   1 20.0507  5.7306   6
  -5  -2   1 6.46123 2.97790   1
   4   2  -1 350.009  22.049   1
   4   2  -1 328.992  19.821   1
  -4  -2   1 327.011  18.841   1
  -4  -2   1 334.490  22.143   6
  -4  -2   1 319.116  17.487   1
  -4  -2   1 328.401  21.783   4
   3   2  -1 1039.04   43.75   1
   3   2  -1 1098.49   46.58   6
   3   2  -1 1070.24   59.32   1
  -3  -2   1 1096.31   52.29   4
  -3  -2   1 1122.19   56.40   6
  -3  -2   1 1077.00   44.18   1
  -3  -2   1 1002.47   63.72   1
   2   2  -1 2.40761 1.98933   1
   2   2  -1 11.2680  3.2203   1
   2   2  -1 4.82372 2.88562   6
  -2  -2   1 12.7545  3.1854   1
  -2  -2   1 7.51524 3.77510   6
  -2  -2   1 8.06607 2.46731   1
  -2  -2   1 5.46172 1.88314   4
   1   2  -1 11.1275  2.3186   7
   1   2  -1 12.7387  2.5909   1
   1   2  -1 11.5015  2.0939   1
   1   2  -1 10.3814  3.2841   6
  -1  -2   1 7.80108 2.33411   1
  -1  -2   1 7.95449 2.35883   1
   0   2  -1 317.512  17.931   1
   0   2  -1 329.450  13.864   1
   0  -2   1 309.427  28.249   1
   0  -2   1 302.018  15.777   1
   0  -2   1 306.964  15.168   7
  -1   2  -1 807.764  41.407   1
  -1   2  -1 794.280  39.094   1
   1  -2   1 833.183  37.515   1
   1  -2   1 828.218  48.487   1
  -2   2  -1 488.039  27.135   1
  -2   2  -1 482.651  20.327   1
   2  -2   1 506.747  24.667   1
   2  -2   1 516.583  20.280   1
  -3   2  -1 439.925  21.825   1
  -3   2  -1 476.343  19.852   1
   3  -2   1 470.833  25.559   3
   3  -2   1 469.864  30.040   1
   3  -2   1 459.053  25.222   1
  -4   2  -1 115.053   9.230   1
  -4   2  -1 100.393   8.157   1
   4  -2   1 104.261  11.307   1
   4  -2   1 95.4785  7.5348   1
  -5   2  -1 54.0283  5.9361   1
  -5   2  -1 38.7956  5.4507   1
  -5   2  -1 41.4265  3.2009   5
   5  -2   1 39.9532  4.8898   1
   5  -2   1 50.5615  6.6712   1
  -6   2  -1 44.1393  3.9848   5
  -6   2  -1 33.2756  6.1412   2
  -6   2  -1 26.0808  5.9876   1
  -6   2  -1 30.6016  4.5880   1
   6  -2   1 49.0520  5.5253   1
   6  -2   1 34.7886  6.5078   1
  -7   2  -1 267.812  18.012   2
  -7   2  -1 256.911  16.102   1
  -7   2  -1 308.101  24.794   1
   7  -2   1 263.112  19.032   1
   7  -2   1 255.176  21.774   1
  -8   2  -1 199.305  14.909   1
  -8   2  -1 196.069  15.335   1
  -8   2  -1 175.758  13.750   2
   8  -2   1 175.307  15.236   1
   8  -2   1 177.332  21.455   1
  -9   2  -1 65.8151  9.5265   2
  -9   2  -1 81.6063 10.2516   1
  -9   2  -1 74.0969 12.5642   1
   9  -2   1 58.9247  9.8485   1
   9  -2   1 68.3219  6.1620   4
 -10   2  -1 -2.2922  4.9310   1
 -10   2  -1 14.8155  6.3851   1
  10  -2   1 -1.4814  5.2916   1
 -11   2  -1 48.7512 11.5990   1
  11  -2   1 26.2945 10.3488   1
 -10  -1   1 285.573  26.084   1
   9   1  -1 27.0497  7.8627   1
   9   1  -1 43.4419  8.6939   2
   9   1  -1 40.4127  7.3456   5
  -9  -1   1 64.8770  9.4552   1
  -9  -1   1 51.3103 11.8712   1
   8   1  -1 59.0514  8.6136   1
   8   1  -1 77.6491 10.3662   1
   8   1  -1 44.2349  7.2289   5
   8   1  -1 63.8840  7.5779   2
  -8  -1   1 68.0559  9.8189   1
  -8  -1   1 50.8369  6.9159   1
  -8  -1   1 58.7033  7.9920   6
   7   1  -1 15.7058  4.9515   1
   7   1  -1 20.4498  4.4502   1
   7   1  -1 16.8523  3.8480   5
   7   1  -1 22.6963  5.7000   2
  -7  -1   1 24.4263  5.4402   1
  -7  -1   1 4.37183 6.93585   6
  -7  -1   1 18.3730  4.6076   1
   6   1  -1 32.5278  5.7590   1
   6   1  -1 37.8964  5.8405   2
   6   1  -1 43.6800  6.4620   1
  -6  -1   1 31.3882  5.4022   1
  -6  -1   1 26.6782  6.5812   6
  -6  -1   1 46.8673  7.6862   1
   5   1  -1 239.214  13.123   1
   5   1  -1 256.948  15.578   2
   5   1  -1 261.102  18.534   1
  -5  -1   1 266.801  17.380   1
  -5  -1   1 265.887  22.694   6
  -5  -1   1 235.872  18.791   1
   4   1  -1 9.63332 2.80079   1
   4   1  -1 9.26283 4.18659   1
  -4  -1   1 -0.8164  4.1133   6
  -4  -1   1 4.94107 2.34324   1
  -4  -1   1 8.70061 3.91237   1
   3   1  -1 2736.72  102.72   1
   3   1  -1 2822.31   93.24   1
  -3  -1   1 2854.71  138.13   6
  -3  -1   1 2782.13  144.10   4
  -3  -1   1 2689.36  142.23   1
  -3  -1   1 2790.20   95.57   1
   2   1  -1 3958.99  185.17   1
   2   1  -1 4112.97  193.66   1
   2   1  -1 3894.48  208.88   6
  -2  -1   1 3969.87  165.58   6
  -2  -1   1 4006.82  193.05   1
  -2  -1   1 3944.75  246.05   1
   1   1  -1 0.71904 1.74160   1
   1   1  -1 4.06448 1.83356   1
   1   1  -1 9.82505 2.35908   6
  -1  -1   1 4.47177 2.11824   1
  -1  -1   1 4.64830 1.99454   6
  -1  -1   1 4.77089 2.25458   1
   0   1  -1 1375.24   72.49   1
   0   1  -1 1379.21   57.40   1
   0   1  -1 1445.06   70.64   7
   0   1  -1 1368.00   84.80   6
   0  -1   1 1195.94   74.86   7
   0  -1   1 1384.31   73.51   1
   0  -1   1 1398.65   57.36   1
  -1   1  -1 7096.58  372.80   1
  -1   1  -1 6998.76  316.29   1
   1  -1   1 7026.11  331.66   1
   1  -1   1 7146.48  296.96   1
  -2   1  -1 2048.95   67.00   1
  -2   1  -1 1976.01   75.52   1
   2  -1   1 1933.20   83.45   3
   2  -1   1 2011.35   72.94   1
   2  -1   1 1995.65   90.55   1
  -3   1  -1 135.578   7.672   1
  -3   1  -1 145.474   8.269   1
   3  -1   1 145.510   8.170   1
   3  -1   1 132.431   9.829   1
  -4   1  -1 148.233   9.094   5
  -4   1  -1 164.987   8.788   1
  -4   1  -1 156.938  10.218   1
  -4   1  -1 155.301   8.333   2
   4  -1   1 174.176  13.302   1
   4  -1   1 161.874   9.524   1
  -5   1  -1 579.527  32.334   1
  -5   1  -1 592.109  35.042   2
  -5   1  -1 574.135  26.213   5
  -5   1  -1 536.230  22.250   1
   5  -1   1 552.954  27.007   1
   5  -1   1 586.667  35.108   1
  -6   1  -1 22.9596  4.3212   2
  -6   1  -1 42.4856  6.1430   1
  -6   1  -1 24.3408  4.3440   1
   6  -1   1 35.8731  4.9208   1
   6  -1   1 25.0705  4.7622   1
  -7   1  -1 331.781  22.277   1
  -7   1  -1 315.548  19.935   1
  -7   1  -1 277.611  18.906   2
   7  -1   1 300.066  23.077   1
   7  -1   1 310.397  18.645   1
  -8   1  -1 685.966  45.564   1
  -8   1  -1 638.835  45.071   1
  -8   1  -1 595.116  71.643   6
   8  -1   1 688.923  57.239   1
   8  -1   1 703.413  61.806   1
  -9   1  -1 13.6762  6.6285   1
  -9   1  -1 34.8486  8.2340   6
  -9   1  -1 21.8260  6.8762   1
   9  -1   1 7.53547 6.47797   1
   9  -1   1 13.9013  2.2782   4
   9  -1   1 8.75196 5.76365   1
 -10   1  -1 18.8799  8.4017   1
 -10   1  -1 19.5584  7.8547   1
  10  -1   1 21.0834  8.3513   1
 -11   1  -1 2.94532 4.38633   1
  11  -1   1 -4.3993  7.3986   1
  10   0  -1 10.6044  6.4311   1
 -10   0   1 3.04087 5.94521   1
   9   0  -1 14.7410  3.9918   5
   9   0  -1 22.6165  7.1580   1
  -9   0   1 11.2283  7.1760   1
  -9   0   1 34.0589  7.2760   1
   8   0  -1 82.4445 11.5051   1
   8   0  -1 91.9923 11.6861   1
   8   0  -1 112.057   9.827   5
  -8   0   1 100.103  11.668   1
  -8   0   1 117.056  15.678   1
  -8   0   1 85.8752 11.1537   6
   7   0  -1 9.45706 5.12678   1
   7   0  -1 14.0805  3.6188   5
   7   0  -1 19.9398  5.1230   1
  -7   0   1 10.2496  3.8392   1
  -7   0   1 14.2575  5.0063   1
  -7   0   1 4.72709 5.77769   6
   6   0  -1 40.8145  6.5906   1
   6   0  -1 63.2432  6.3011   2
   6   0  -1 51.5276  6.5814   1
   6   0  -1 58.0830  5.0543   5
  -6   0   1 59.8053  9.5355   6
  -6   0   1 52.5084  5.5232   1
  -6   0   1 61.6379  7.3573   1
   5   0  -1 125.265   9.858   1
   5   0  -1 135.564   9.940   1
   5   0  -1 126.337   8.262   2
  -5   0   1 125.987   8.819   1
  -5   0   1 152.230  15.506   6
  -5   0   1 118.900  10.275   1
   4   0  -1 2415.41   96.53   1
   4   0  -1 2365.56  130.87   1
   4   0  -1 2300.72  107.69   2
  -4   0   1 2270.16   97.48   1
  -4   0   1 2336.69  105.53   1
   3   0  -1 4059.09  180.65   2
   3   0  -1 4065.86  184.29   1
   3   0  -1 3879.38  189.29   1
  -3   0   1 4066.83  196.31   1
  -3   0   1 3793.92  202.49   1
   2   0  -1 9239.72  561.97   1
   2   0  -1 9134.28  396.96   1
  -2   0   1 8884.45  448.37   1
  -2   0   1 9109.61  403.09   1
   1   0  -1 4090.62  168.21   1
   1   0  -1 4003.58  230.37   1
  -1   0   1 4127.21  223.51   1
  -1   0   1 4151.10  170.54   1
  -2   0  -1 5928.18  332.69   5
  -2   0  -1 5922.37  201.10   1
  -2   0  -1 6041.84  223.65   2
  -2   0  -1 5934.82  277.03   1
   2   0   1 5980.45  216.50   1
   2   0   1 4743.89  315.84   1
  -3   0  -1 2.25031 2.01818   1
  -3   0  -1 2.14566 1.92750   2
  -3   0  -1 1.89533 1.38629   1
  -3   0  -1 1.49253 1.22741   5
   3   0   1 4.94946 1.25489   5
   3   0   1 4.66361 2.05272   1
   3   0   1 5.57118 1.58591   1
   3   0   1 1.07921 2.32851   2
  -4   0  -1 61.3423  3.6742   5
  -4   0  -1 50.2218  4.1280   1
  -4   0  -1 46.0351  4.8280   2
  -4   0  -1 60.8672  4.0918   1
   4   0   1 53.3260  4.7587   1
   4   0   1 53.7345  4.5618   5
   4   0   1 48.2611  4.9203   2
   4   0   1 63.8183  4.4810   1
  -5   0  -1 111.983   7.997   2
  -5   0  -1 90.7673  8.9779   1
  -5   0  -1 82.2524  5.5381   1
  -5   0  -1 78.0425  8.5357   6
   5   0   1 89.3498  7.0284   5
   5   0   1 115.618   8.112   1
   5   0   1 92.6812  9.2019   1
   5   0   1 84.3495  6.7433   2
  -6   0  -1 152.377  11.869   6
  -6   0  -1 147.687  10.901   1
  -6   0  -1 167.344  14.100   1
   6   0   1 132.294   9.574   1
   6   0   1 137.019  10.990   5
   6   0   1 145.443  11.425   1
  -7   0  -1 111.496  10.668   1
  -7   0  -1 132.391  15.683   6
  -7   0  -1 89.8981  8.9422   1
   7   0   1 117.928   7.654   5
   7   0   1 130.855   8.609   1
   7   0   1 91.5520 11.0465   1
  -8   0  -1 1879.46   99.47   1
  -8   0  -1 1919.63  186.26   6
  -8   0  -1 1935.33  160.89   1
   8   0   1 1920.85  167.83   1
   8   0   1 1980.50  120.51   4
   8   0   1 1934.25  124.51   1
  -9   0  -1 98.5526 23.0790   6
  -9   0  -1 101.953  12.656   1
  -9   0  -1 80.4999 12.8526   1
   9   0   1 83.0750  8.5700   1
   9   0   1 82.5148  9.1741   1
 -10   0  -1 28.8199  7.4248   1
 -10   0  -1 29.7530  9.4387   1
  10   0   1 11.8495  5.8610   1
 -11   0  -1 27.7374  9.1784   1
 -11   1   1 262.233  23.663   1
  10  -1  -1 70.3571 12.9716   1
 -10   1   1 63.2958  9.1820   1
 -10   1   1 105.598  13.265   1
   9  -1  -1 32.0801  7.8844   1
  -9   1   1 63.2744 11.5736   1
  -9   1   1 45.3335  9.7886   1
   8  -1  -1 225.631  18.487   1
   8  -1  -1 241.211  23.447   1
  -8   1   1 175.524  23.915   6
  -8   1   1 267.926  29.407   1
  -8   1   1 239.301  18.705   1
   7  -1  -1 30.1559  6.3625   1
   7  -1  -1 26.3100  2.5557   5
   7  -1  -1 15.7790  5.8033   1
  -7   1   1 27.4005  5.2513   1
  -7   1   1 30.0487  6.5491   1
   6  -1  -1 391.776  19.946   1
   6  -1  -1 423.308  33.067   1
   6  -1  -1 376.116  14.431   5
  -6   1   1 352.780  29.835   1
  -6   1   1 412.821  26.600   1
   5  -1  -1 150.326   8.824   1
   5  -1  -1 128.539  11.313   1
   5  -1  -1 128.971   8.121   5
  -5   1   1 146.522  12.772   1
   4  -1  -1 1092.56   52.36   1
   4  -1  -1 1066.66   61.13   1
   4  -1  -1 1007.61   42.59   5
  -4   1   1 998.668  48.117   1
  -4   1   1 1064.19   58.95   1
   3  -1  -1 533.597  21.726   4
   3  -1  -1 556.698  30.659   1
   3  -1  -1 563.982  23.176   1
  -3   1   1 601.285  38.622   1
  -3   1   1 522.906  44.897   1
   2  -1  -1 708.721  34.986   1
   2  -1  -1 679.072  31.030   4
   2  -1  -1 691.633  36.713   1
  -2   1   1 680.225  33.267   4
  -2   1   1 715.063  29.580   2
  -2   1   1 696.649  30.774   1
  -2   1   1 664.338  29.849   1
   1   1   1 363.512  50.567   5
  -2  -1  -1 1552.11   79.75   6
  -2  -1  -1 1421.83   74.57   1
   2   1   1 1512.00   83.28   1
   2   1   1 1511.01   75.68   6
   2   1   1 1490.79   82.47   1
   2   1   1 1447.54   72.97   2
   2   1   1 1433.38   81.06   5
  -3  -1  -1 1.08834 2.51362   6
  -3  -1  -1 2.10016 1.79519   1
  -3  -1  -1 -0.5646  1.0603   1
   3   1   1 -0.2654  1.4300   5
   3   1   1 2.44733 1.66306   1
   3   1   1 0.61644 1.04881   1
   3   1   1 6.12609 2.98838   2
   3   1   1 -0.3347  2.1003   6
  -4  -1  -1 197.645  15.691   6
  -4  -1  -1 196.539  12.383   1
  -4  -1  -1 187.706  11.900   1
   4   1   1 185.726  12.143   2
   4   1   1 200.765  12.958   1
   4   1   1 181.784   7.777   1
   4   1   1 197.193  11.204   5
  -5  -1  -1 65.3737  6.5672   6
  -5  -1  -1 52.6649  5.2020   1
  -5  -1  -1 64.0244  5.0938   1
   5   1   1 59.7516  5.0475   5
   5   1   1 71.7182  5.5988   1
   5   1   1 46.6543  5.1642   2
   5   1   1 49.9974  3.9910   4
   5   1   1 58.4712  6.2871   1
  -6  -1  -1 557.340  26.248   1
  -6  -1  -1 545.271  28.900   1
  -6  -1  -1 584.518  43.623   6
   6   1   1 576.616  22.775   1
   6   1   1 559.492  37.490   5
   6   1   1 528.177  25.983   2
   6   1   1 588.790  36.975   1
   6   1   1 583.296  30.917   4
  -7  -1  -1 69.6455  9.5801   1
  -7  -1  -1 74.6916 10.9663   6
  -7  -1  -1 67.3699  7.4197   1
   7   1   1 63.2541  8.8124   1
   7   1   1 72.9441  6.8485   4
   7   1   1 61.4757  7.6228   2
   7   1   1 63.7441  5.1029   5
   7   1   1 69.0142  8.5726   1
  -8  -1  -1 117.653  15.014   1
  -8  -1  -1 133.839  15.438   6
  -8  -1  -1 143.937  12.550   1
   8   1   1 129.265  16.016   1
   8   1   1 127.840  10.768   5
   8   1   1 120.673  13.706   2
   8   1   1 147.099  14.341   1
  -9  -1  -1 20.8890  5.8629   1
  -9  -1  -1 11.4201  5.9871   6
  -9  -1  -1 17.6352  6.7098   1
   9   1   1 14.6798  4.3570   1
   9   1   1 10.4184  6.4298   1
   9   1   1 6.67014 3.16184   5
 -10  -1  -1 33.6118  7.7989   1
 -10  -1  -1 32.7491  8.7153   1
  10   1   1 31.6572  8.3932   1
 -11  -1  -1 20.2495  6.8210   1
  11  -2  -1 -2.8293 10.8875   1
 -11   2   1 15.4290  9.4861   1
  10  -2  -1 9.97278 9.24193   1
 -10   2   1 5.84163 8.04617   1
 -10   2   1 15.9089  9.8124   1
   9  -2  -1 -0.5214  6.3416   1
  -9   2   1 5.11592 6.62802   1
  -9   2   1 3.39118 6.43048   1
   8  -2  -1 389.888  25.971   1
   8  -2  -1 385.630  26.853   1
  -8   2   1 383.036  21.669   1
  -8   2   1 358.883  29.857   1
   7  -2  -1 481.709  30.989   1
   7  -2  -1 513.376  35.682   1
  -7   2   1 429.046  29.771   1
  -7   2   1 524.097  29.993   1
   6  -2  -1 19.1716  5.9539   1
   6  -2  -1 18.1972  4.5082   1
   6  -2  -1 20.5655  2.4212   4
  -6   2   1 22.0012  6.7544   1
  -6   2   1 17.8006  5.1497   1
   5  -2  -1 152.413  10.863   4
   5  -2  -1 185.153  15.459   1
   5  -2  -1 174.124  17.393   1
  -5   2   1 149.156  10.480   1
  -5   2   1 169.855  10.331   2
  -5   2   1 163.599  12.116   1
   4  -2  -1 3.42787 2.87130   1
   4  -2  -1 5.68943 1.81325   4
   4  -2  -1 0.27960 2.33244   1
  -4   2   1 5.37049 3.90434   1
  -4   2   1 4.62854 1.59177   2
  -4   2   1 2.09315 3.00744   1
   3  -2  -1 220.219  15.936   1
   3  -2  -1 229.547  14.898   4
   3  -2  -1 217.932  12.476   1
  -3   2   1 223.733  11.094   1
  -3   2   1 214.861  11.199   1
   2  -2  -1 26.5015  3.0333   4
   2  -2  -1 22.5051  3.5036   1
   2  -2  -1 24.8581  2.6615   1
  -2   2   1 25.1702  3.1542   1
  -2   2   1 21.0421  3.8999   1
  -2   2   1 22.1050  2.0036   5
   1  -2  -1 4224.05  137.61   1
   1  -2  -1 4361.15  196.53   4
   1  -2  -1 4478.40  189.96   1
  -1   2   1 4411.05  212.49   1
  -1   2   1 4212.12  201.71   1
  -1   2   1 4301.76  193.28   4
   0  -2  -1 2220.35   90.19   1
   0  -2  -1 2326.53  105.69   4
   0  -2  -1 2282.56  100.43   3
   0  -2  -1 2219.34   95.22   1
   0   2   1 2239.32  114.31   3
   0   2   1 2349.58   82.35   1
   0   2   1 2231.32   65.20   1
   0   2   1 2259.23   99.38   4
  -1  -2  -1 1731.51  115.23   7
  -1  -2  -1 1686.44   73.43   1
  -1  -2  -1 1799.74   91.29   4
   1   2   1 1788.31   72.96   1
   1   2   1 1786.94   84.85   7
   1   2   1 1783.64   98.22   4
   1   2   1 1682.64   78.69   1
  -2  -2  -1 989.526  49.064   4
  -2  -2  -1 999.520  53.915   1
   2   2   1 1029.98   46.52   1
   2   2   1 1020.76   52.82   1
   2   2   1 1056.78   65.73   4
   2   2   1 1051.91   51.08   6
  -3  -2  -1 208.197   9.351   1
  -3  -2  -1 199.491  10.559   1
  -3  -2  -1 188.561  12.102   6
   3   2   1 201.335  10.945   1
   3   2   1 206.219  13.794   6
   3   2   1 185.878  11.125   1
   3   2   1 208.976  15.482   4
  -4  -2  -1 444.998  17.473   1
  -4  -2  -1 428.483  21.509   1
  -4  -2  -1 454.327  27.367   6
   4   2   1 464.321  28.951   2
   4   2   1 468.645  21.141   1
   4   2   1 414.457  20.936   6
   4   2   1 475.012  34.711   4
   4   2   1 438.807  23.454   1
   4   2   1 430.450  20.181   5
  -5  -2  -1 480.830  36.296   1
  -5  -2  -1 496.816  29.428   1
  -5  -2  -1 480.495  31.875   6
   5   2   1 479.257  32.196   1
   5   2   1 475.048  23.528   4
   5   2   1 491.505  20.531   1
   5   2   1 487.886  25.229   5
   5   2   1 516.746  30.808   2
  -6  -2  -1 352.405  28.707   1
  -6  -2  -1 363.284  18.982   1
  -6  -2  -1 379.749  27.844   6
   6   2   1 393.757  21.054   2
   6   2   1 339.125  14.190   1
   6   2   1 352.821  24.302   4
   6   2   1 388.793  17.928   5
   6   2   1 344.333  23.128   1
  -7  -2  -1 753.980  57.382   6
  -7  -2  -1 762.545  48.483   1
  -7  -2  -1 759.490  49.816   1
   7   2   1 796.718  50.923   5
   7   2   1 731.710  48.960   4
   7   2   1 784.734  39.435   1
   7   2   1 732.802  65.738   1
   7   2   1 699.835  34.943   2
  -8  -2  -1 11.3293  5.1548   1
  -8  -2  -1 12.4435  4.5350   1
  -8  -2  -1 6.63949 6.09310   6
   8   2   1 20.3968  5.5820   5
   8   2   1 4.63219 6.41079   2
   8   2   1 9.70715 3.80968   1
   8   2   1 13.4160  5.1595   1
  -9  -2  -1 51.0316  7.3772   1
  -9  -2  -1 60.5019  8.7319   1
   9   2   1 45.2030  6.8565   1
   9   2   1 51.1527 10.1855   2
   9   2   1 40.3836  6.9949   1
   9   2   1 42.9680  6.5586   5
 -10  -2  -1 5.53881 4.40306   1
  10   2   1 7.50630 5.71977   2
 -11  -2  -1 1.98010 5.10027   1
  11  -3  -1 25.4788 11.6586   1
 -11   3   1 5.86934 9.47651   1
  10  -3  -1 211.834  23.999   1
 -10   3   1 171.383  21.438   1
 -10   3   1 203.014  26.682   1
   9  -3  -1 8.73018 7.70586   1
  -9   3   1 25.6434  7.9973   1
  -9   3   1 7.84655 7.83580   1
   8  -3  -1 864.012  46.853   1
   8  -3  -1 987.467  86.388   1
   8  -3  -1 890.158  80.741   4
  -8   3   1 949.195  81.243   1
  -8   3   1 953.996  48.696   1
   7  -3  -1 35.6673  7.4254   1
   7  -3  -1 30.8449  7.1820   1
   7  -3  -1 44.8513  4.5271   4
  -7   3   1 47.5418  8.0076   1
  -7   3   1 30.7302  5.7147   2
  -7   3   1 49.2531  8.4861   1
   6  -3  -1 603.256  50.139   4
   6  -3  -1 675.734  51.017   1
   6  -3  -1 655.601  46.128   1
  -6   3   1 724.625  30.406   1
  -6   3   1 664.658  32.952   1
  -6   3   1 645.216  27.314   2
   5  -3  -1 52.0322  6.9193   1
   5  -3  -1 46.6993  6.5773   1
   5  -3  -1 39.1069  4.7450   4
  -5   3   1 35.8913  6.2286   1
  -5   3   1 59.7405  7.1695   1
  -5   3   1 39.9606  4.7637   2
   4  -3  -1 94.4376  7.6318   1
   4  -3  -1 96.8684  9.1050   1
   4  -3  -1 87.9206  6.9132   4
  -4   3   1 82.2030  7.0764   1
  -4   3   1 105.643   9.417   1
   3  -3  -1 3081.10  134.08   1
   3  -3  -1 3062.38  141.83   4
   3  -3  -1 2804.95  126.60   1
  -3   3   1 2838.78  187.83   1
  -3   3   1 3096.04  123.45   1
   2  -3  -1 321.280  16.902   4
   2  -3  -1 322.145  10.971   1
   2  -3  -1 306.414  14.422   1
  -2   3   1 346.100  15.474   1
  -2   3   1 331.193  15.469   1
   1  -3  -1 137.831   8.502   1
   1  -3  -1 156.314   8.461   3
   1  -3  -1 153.391   7.555   1
   1  -3  -1 144.587   8.260   4
  -1   3   1 122.090   6.639   4
  -1   3   1 123.591  11.524   1
  -1   3   1 133.976  11.164   1
   0  -3  -1 2003.49   59.35   1
   0  -3  -1 1931.15   93.95   1
   0  -3  -1 1985.11   92.64   4
   0   3   1 1971.42   74.36   1
   0   3   1 1972.54  148.65   1
   0   3   1 1948.80  105.43   3
   0   3   1 1921.86   90.84   4
  -1  -3  -1 8048.21  375.79   1
  -1  -3  -1 8146.71  520.01   7
  -1  -3  -1 8569.89  309.28   1
  -1  -3  -1 8670.55  415.26   4
   1   3   1 8576.14  366.40   4
   1   3   1 8480.52  513.70   1
   1   3   1 8359.51  353.59   1
   1   3   1 8507.04  354.29   7
  -2  -3  -1 59.7102  4.5771   1
  -2  -3  -1 74.3196  4.4203   1
  -2  -3  -1 59.3330  5.7110   4
   2   3   1 57.1769  4.7341   7
   2   3   1 60.2195  5.4425   6
   2   3   1 57.0014  3.6592   1
   2   3   1 55.0885  5.1078   4
   2   3   1 62.0761  3.7149   1
  -3  -3  -1 905.541  48.889   1
  -3  -3  -1 860.709  51.210   1
  -3  -3  -1 928.675  43.568   4
   3   3   1 838.561  40.945   6
   3   3   1 834.779  41.616   1
   3   3   1 902.319  30.485   1
   3   3   1 930.525  42.037   4
   3   3   1 929.489  49.447   7
  -4  -3  -1 1401.24   84.27   1
  -4  -3  -1 1432.27   74.42   6
  -4  -3  -1 1451.36   69.99   1
   4   3   1 1453.87   85.36   1
   4   3   1 1474.46   71.82   1
   4   3   1 1450.13   79.59   4
   4   3   1 1442.29   53.70   6
  -5  -3  -1 409.314  21.244   1
  -5  -3  -1 442.031  27.693   6
  -5  -3  -1 444.663  21.403   1
   5   3   1 403.184  21.204   6
   5   3   1 402.017  18.936   1
   5   3   1 416.666  24.269   4
   5   3   1 376.209  22.882   1
   5   3   1 434.265  24.536   5
  -6  -3  -1 281.276  19.537   1
  -6  -3  -1 280.763  20.603   6
  -6  -3  -1 270.569  15.231   1
   6   3   1 300.433  26.744   1
   6   3   1 280.698  22.408   2
   6   3   1 293.614  24.393   5
   6   3   1 299.494  15.088   4
   6   3   1 270.598  23.226   1
  -7  -3  -1 723.070  57.436   1
  -7  -3  -1 724.593  77.608   1
  -7  -3  -1 749.961  60.201   6
   7   3   1 692.233  58.978   2
   7   3   1 745.597  42.712   1
   7   3   1 721.803  92.500   1
   7   3   1 703.577  43.198   5
  -8  -3  -1 76.8087  8.1764   1
  -8  -3  -1 85.2972 10.6304   1
  -8  -3  -1 64.8630 10.5855   6
   8   3   1 63.9910  7.8364   1
   8   3   1 70.6176  7.9953   1
   8   3   1 54.4157 10.5402   5
   8   3   1 60.1319 10.4088   2
  -9  -3  -1 5.93624 3.21110   1
  -9  -3  -1 3.96264 3.95998   1
   9   3   1 8.53137 7.91070   2
   9   3   1 -2.3107  4.5593   5
   9   3   1 10.7502  4.6454   1
   9   3   1 2.43198 3.54783   1
 -10  -3  -1 168.975  21.688   1
  10   3   1 154.057  23.151   2
  10  -4  -1 49.9431 10.5857   1
 -10   4   1 54.5046  8.7512   1
 -10   4   1 62.8639 39.5912   1
   9  -4  -1 0.18822 9.36436   1
  -9   4   1  3.8579 10.4494   1
  -9   4   1 6.34224 7.99465   1
   8  -4  -1 308.733  33.167   4
   8  -4  -1 330.797  27.764   1
  -8   4   1 315.870  31.401   1
  -8   4   1 323.120  20.132   2
  -8   4   1 347.784  33.327   1
   7  -4  -1 76.0747  7.6252   4
   7  -4  -1 65.3420 10.6110   1
   7  -4  -1 67.5653  8.7530   1
  -7   4   1 57.5462 10.5080   1
  -7   4   1 40.7952  8.0531   1
  -7   4   1 54.4119  7.9612   2
   6  -4  -1 52.0509  6.3703   1
   6  -4  -1 37.5348  5.0987   4
   6  -4  -1 53.7454 10.1900   1
  -6   4   1 46.1045  7.0112   1
  -6   4   1 37.2656  6.1645   2
  -6   4   1 34.8360  7.2521   1
   5  -4  -1 1262.29   97.91   4
   5  -4  -1 1223.06   95.83   1
   5  -4  -1 1351.21   70.64   1
  -5   4   1 1266.40   67.82   1
  -5   4   1 1207.57   55.21   1
   4  -4  -1 75.3801  7.4573   4
   4  -4  -1 69.4374  7.6153   1
   4  -4  -1 85.6997  9.9868   1
  -4   4   1 63.0312  6.9638   1
  -4   4   1 70.2347  8.3324   1
   3  -4  -1 -0.3484  2.6133   1
   3  -4  -1 -2.4286  2.1432   1
   3  -4  -1 -1.9449  1.8285   4
  -3   4   1 1.59850 2.74929   1
  -3   4   1 0.35853 2.51197   1
   2  -4  -1 1031.78   40.11   1
   2  -4  -1 1002.51   52.73   3
   2  -4  -1 984.244  46.816   4
   2  -4  -1 1015.24   35.43   1
  -2   4   1 979.464  33.246   1
  -2   4   1 941.789  31.890   1
   1  -4  -1 1797.98   93.11   4
   1  -4  -1 1723.10   65.15   1
   1  -4  -1 1866.26   74.16   1
  -1   4   1 1816.17   54.60   1
  -1   4   1 1810.63   88.75   1
   0  -4  -1 2208.40  125.15   7
   0  -4  -1 2264.61  109.65   1
   0  -4  -1 2253.14   79.40   4
   0  -4  -1 2123.55   80.85   1
   0   4   1 2205.76  110.47   1
   0   4   1 2154.28  105.39   3
   0   4   1 2226.28   93.55   4
   0   4   1 2220.02   89.81   1
  -1  -4  -1 1932.74   73.97   4
  -1  -4  -1 1984.29   89.99   1
  -1  -4  -1 1965.05  103.27   7
  -1  -4  -1 2002.17   83.77   1
   1   4   1 2018.81   76.27   4
   1   4   1 1983.54  100.79   1
   1   4   1 2010.13   52.36   1
   1   4   1 1981.43   66.81   7
  -2  -4  -1 27.7341  3.6236   1
  -2  -4  -1 23.1101  3.6832   4
  -2  -4  -1 25.8997  2.2718   1
   2   4   1 22.7402  3.1378   1
   2   4   1 21.9523  5.1489   7
   2   4   1 31.1535  4.7937   4
   2   4   1 21.1415  2.5118   1
  -3  -4  -1 454.569  28.008   4
  -3  -4  -1 482.231  28.298   1
  -3  -4  -1 462.933  27.744   1
   3   4   1 477.659  20.127   6
   3   4   1 491.474  29.732   1
   3   4   1 559.078  28.441   7
   3   4   1 453.546  19.751   1
   3   4   1 503.242  26.564   4
  -4  -4  -1 792.422  53.678   1
  -4  -4  -1 809.806  36.122   4
  -4  -4  -1 829.256  42.716   1
   4   4   1 813.208  37.311   4
   4   4   1 790.677  49.070   1
   4   4   1 857.419  45.236   7
   4   4   1 807.586  36.999   6
   4   4   1 814.551  32.908   1
  -5  -4  -1 17.3132  2.8034   1
  -5  -4  -1 15.0110  2.8307   1
   5   4   1 24.5324  3.2667   1
   5   4   1 18.1569  2.4867   1
   5   4   1 26.6854  5.4486   6
   5   4   1 17.2365  5.5951   7
  -6  -4  -1 27.6174  4.3620   1
  -6  -4  -1 41.6103  5.7714   1
   6   4   1 24.5282  6.0339   5
   6   4   1 22.4099  4.9205   1
   6   4   1 42.8346  7.1430   6
   6   4   1 34.1084  5.0296   1
  -7  -4  -1 30.1564  4.3200   1
  -7  -4  -1 40.1753  5.7138   1
   7   4   1 19.8706  5.9397   5
   7   4   1 33.4009  5.7878   1
   7   4   1 36.0395  4.8742   1
   7   4   1 31.0391  6.4524   2
  -8  -4  -1 37.1539  6.4169   1
  -8  -4  -1 48.2125  5.1983   1
   8   4   1 39.3242  4.7973   1
   8   4   1 37.9154  6.1926   2
   8   4   1 27.3155  7.6506   5
   8   4   1 37.2793  5.0383   1
  -9  -4  -1 14.7939  5.5114   1
   9   4   1 6.81022 4.30261   1
   9   4   1 4.69010 8.06032   5
   9   4   1 8.64129 6.67412   2
 -10  -4  -1 11.8386  4.0657   1
  10   4   1 13.2400  8.7136   2
  10  -5  -1 59.0955 10.2010   1
 -10   5   1 90.9615 14.4239   1
   9  -5  -1 118.266  13.347   1
  -9   5   1 90.4867  9.0029   2
  -9   5   1 135.470  15.305   1
  -9   5   1 132.807  18.922   1
   8  -5  -1 18.2538  7.6882   1
   8  -5  -1 29.6152  4.9945   4
  -8   5   1 26.2660  9.6994   1
  -8   5   1 35.6468  6.7448   1
  -8   5   1 21.5225  5.0528   2
   7  -5  -1 275.466  21.693   1
   7  -5  -1 247.152  24.184   4
   7  -5  -1 234.802  19.630   1
  -7   5   1 290.447  28.667   1
  -7   5   1 248.106  23.855   1
  -7   5   1 237.762  18.380   2
   6  -5  -1 407.353  32.338   4
   6  -5  -1 446.583  28.165   1
   6  -5  -1 432.771  26.993   1
  -6   5   1 437.461  26.646   1
  -6   5   1 373.515  26.653   1
   5  -5  -1 55.9249  9.5786   1
   5  -5  -1 52.9832  7.1177   4
   5  -5  -1 64.8400  9.9139   1
  -5   5   1 61.0651  9.8258   1
  -5   5   1 55.5694  8.9999   1
   4  -5  -1 759.866  42.557   1
   4  -5  -1 753.826  33.250   1
   4  -5  -1 740.738  46.497   4
  -4   5   1 701.553  27.637   1
  -4   5   1 810.848  47.831   1
   3  -5  -1 41.8516  6.0397   4
   3  -5  -1 38.5614  6.5309   1
   3  -5  -1 42.1869  5.9899   1
   3  -5  -1 46.7536  3.8224   3
  -3   5   1 45.9944  7.6674   1
  -3   5   1 30.8225  5.2544   1
   2  -5  -1 61.8485  6.2821   1
   2  -5  -1 65.3467  6.6888   4
   2  -5  -1 46.3836  6.2070   1
  -2   5   1 61.3350  5.5292   1
  -2   5   1 61.5127  7.5479   1
   1  -5  -1 1590.36   76.07   4
   1  -5  -1 1558.91   65.00   1
   1  -5  -1 1664.47   61.54   1
  -1   5   1 1623.47   80.74   1
  -1   5   1 1601.41   80.19   3
  -1   5   1 1634.13   40.27   1
   0  -5  -1 2452.54   93.05   4
   0  -5  -1 2421.10  154.26   1
   0  -5  -1 2435.89  109.64   7
   0  -5  -1 2311.28  109.25   1
   0   5   1 2502.72  103.89   1
   0   5   1 2441.10   92.73   3
   0   5   1 2395.46   51.25   1
  -1  -5  -1 220.296  13.184   1
  -1  -5  -1 247.411  17.174   4
  -1  -5  -1 221.658  12.873   1
  -1  -5  -1 262.771  16.927   7
   1   5   1 249.589   9.450   1
   1   5   1 215.517  12.160   1
  -2  -5  -1 38.8376  4.3054   1
  -2  -5  -1 49.8101  5.4243   7
  -2  -5  -1 33.4019  6.2651   4
  -2  -5  -1 34.8713  3.7654   1
   2   5   1 31.7730  4.4338   1
   2   5   1 27.3778  3.3570   1
   2   5   1 37.2304  4.4325   7
  -3  -5  -1 430.869  27.015   1
  -3  -5  -1 401.942  19.627   1
  -3  -5  -1 409.918  25.389   4
   3   5   1 398.351  31.133   7
   3   5   1 426.408  23.885   1
   3   5   1 405.535  33.130   6
   3   5   1 395.530  19.981   1
  -4  -5  -1 158.713  11.758   1
  -4  -5  -1 162.912  11.586   4
  -4  -5  -1 159.320   9.491   1
   4   5   1 156.417  12.446   6
   4   5   1 167.880  12.188   7
   4   5   1 155.468  10.860   1
   4   5   1 148.616  10.067   1
  -5  -5  -1 558.564  54.108   1
  -5  -5  -1 549.535  38.606   1
   5   5   1 543.237  31.974   6
   5   5   1 529.409  34.584   1
   5   5   1 556.290  49.592   7
  -6  -5  -1 2047.85  126.52   1
  -6  -5  -1 2248.40  131.03   1
   6   5   1 2276.00  191.30   7
   6   5   1 2198.01  117.07   6
   6   5   1 2108.86  137.24   1
   6   5   1 2247.27  156.57   1
  -7  -5  -1 22.8405  3.5367   1
  -7  -5  -1 16.3025  2.9954   1
   7   5   1 10.4823  3.4309   1
   7   5   1 2.63803 7.19429   7
   7   5   1 12.1826  3.3472   1
   7   5   1 17.8576  8.6607   6
   7   5   1 17.8867  6.8040   5
  -8  -5  -1 11.6804  4.6267   1
  -8  -5  -1 -0.9170  2.7669   1
   8   5   1 1.31719 3.31493   1
   8   5   1 -6.4372  5.4124   2
   8   5   1 2.71507 6.96555   5
  -9  -5  -1 41.9840  7.3579   1
   9   5   1 56.4238 14.7497   2
  10   5   1 9.19224 8.86743   2
  10  -6  -1 54.1931 10.7992   1
 -10   6   1 64.0029 13.6376   1
   9  -6  -1 44.2347 11.3877   1
  -9   6   1 59.6748 12.5652   1
   8  -6  -1 -0.3739  8.4765   1
   8  -6  -1 1.88233 3.75492   4
  -8   6   1 0.15112 4.52923   2
  -8   6   1 12.0181 11.3085   1
   7  -6  -1 25.4529  8.1976   1
   7  -6  -1 30.8642 10.1874   1
   7  -6  -1 30.8619  5.6449   4
  -7   6   1 40.0232 10.2484   1
  -7   6   1 41.2950  8.6755   1
   6  -6  -1 5.35971 5.28007   4
   6  -6  -1 3.09381 6.05505   1
   6  -6  -1 3.39619 4.95550   1
  -6   6   1 4.00853 5.98890   1
  -6   6   1 -5.5016  5.1945   1
   5  -6  -1 14.7248  6.6229   1
   5  -6  -1 16.6061  7.2250   1
   5  -6  -1 3.44146 4.95405   4
  -5   6   1 2.48338 6.68281   1
  -5   6   1 7.30273 5.74133   1
   4  -6  -1 15.1381  6.3103   1
   4  -6  -1 -0.1125  3.6473   4
   4  -6  -1 4.04941 4.26618   1
  -4   6   1 4.70727 3.59335   1
  -4   6   1 8.86288 6.57848   1
   3  -6  -1 70.8684 10.2850   4
   3  -6  -1 55.2591  8.8678   1
  -3   6   1 56.8811  8.1514   1
  -3   6   1 60.0500  8.0253   1
   2  -6  -1 663.012  37.167   1
   2  -6  -1 668.772  47.423   4
   2  -6  -1 707.672  30.546   1
  -2   6   1 678.002  31.338   1
  -2   6   1 673.529  32.973   1
   1  -6  -1 246.288  20.026   4
   1  -6  -1 233.646  26.467   1
   1  -6  -1 222.013  14.912   1
   1  -6  -1 226.355  17.696   7
  -1   6   1 210.847  13.820   1
  -1   6   1 258.798  18.157   1
  -1   6   1 247.909   8.928   3
   0  -6  -1 33.0810  4.8090   7
   0  -6  -1 25.9800  4.5041   1
   0  -6  -1 21.0707  5.6806   1
   0  -6  -1 31.0496  5.4325   4
   0   6   1 29.4184  6.5997   1
   0   6   1 24.1016  4.6866   1
   0   6   1 23.9883  2.7018   3
  -1  -6  -1 6.06494 3.28071   1
  -1  -6  -1 6.90477 5.12637   4
  -1  -6  -1 -0.2516  2.4299   1
  -1  -6  -1 2.88844 2.87651   7
   1   6   1 -0.3049  2.8291   1
   1   6   1 0.00000 2.04575   1
  -2  -6  -1 65.5878  7.5134   4
  -2  -6  -1 55.7285  5.7769   1
  -2  -6  -1 64.3835  7.4652   1
   2   6   1 64.2456  7.4908   1
   2   6   1 65.8122  4.7995   1
   2   6   1 61.1498  7.2080   7
  -3  -6  -1 -0.1505  2.7608   1
  -3  -6  -1 2.29222 3.35313   4
  -3  -6  -1 2.58946 2.77799   1
   3   6   1 3.75011 4.44979   7
   3   6   1 2.64067 2.14359   1
   3   6   1 4.01845 3.05427   1
   3   6   1 -0.5047  3.3419   6
  -4  -6  -1 0.89772 1.89528   1
  -4  -6  -1 0.00000 4.70799   4
  -4  -6  -1 2.99810 2.18069   1
   4   6   1 0.56075 1.82246   1
   4   6   1 -1.9042  2.0213   1
   4   6   1 1.63953 5.04697   7
   4   6   1 8.56640 6.20438   6
  -5  -6  -1 158.673  14.655   4
  -5  -6  -1 155.961  16.955   1
  -5  -6  -1 195.494  16.008   1
   5   6   1 197.245  15.759   6
   5   6   1 160.691  15.070   1
   5   6   1 179.773  21.764   7
   5   6   1 164.277  16.529   1
  -6  -6  -1 757.592  56.498   1
  -6  -6  -1 762.672  49.160   1
   6   6   1 798.701  51.958   1
   6   6   1 719.062  47.213   6
   6   6   1 768.697  60.553   1
   6   6   1 796.059  65.531   7
  -7  -6  -1 298.756  27.644   1
  -7  -6  -1 280.322  28.056   1
   7   6   1 261.739  28.121   1
   7   6   1 251.441  24.970   1
   7   6   1 300.086  21.261   6
  -8  -6  -1 32.4755  5.7609   1
   8   6   1 56.2091 12.0940   2
   8   6   1 32.9625  4.7385   1
  -9  -6  -1 40.6821  7.9213   1
   9   6   1 52.0205 14.4908   2
   9  -7  -1 168.403  22.034   1
  -9   7   1 205.458  22.925   1
   8  -7  -1 109.970  16.365   1
   8  -7  -1 119.716  11.495   3
   8  -7  -1 101.467   9.166   4
  -8   7   1 154.174  19.213   1
   7  -7  -1 163.008  18.612   4
   7  -7  -1 185.471  19.178   1
  -7   7   1 144.990  18.589   1
  -7   7   1 191.043  20.424   5
   6  -7  -1 3.90636 5.87046   1
   6  -7  -1 6.21229 6.87135   4
   6  -7  -1 9.90031 6.56806   1
  -6   7   1 5.34808 7.94305   1
   5  -7  -1 93.7719 13.9426   4
   5  -7  -1 94.5930 11.0992   1
   5  -7  -1 93.6943 10.2632   1
  -5   7   1 87.7937 11.1939   1
  -5   7   1 90.8848 13.3360   1
   4  -7  -1 38.4507  7.9544   4
   4  -7  -1 59.8788  9.4466   1
   4  -7  -1 48.4151 10.7357   1
  -4   7   1 34.7611  8.5730   1
   3  -7  -1 460.533  41.160   4
   3  -7  -1 500.112  43.576   1
   3  -7  -1 425.490  30.705   1
  -3   7   1 500.365  27.140   1
  -3   7   1 491.448  29.480   1
   2  -7  -1 972.522  75.011   1
   2  -7  -1 974.392  45.948   1
   2  -7  -1 966.114  91.895   4
  -2   7   1 941.508  54.490   1
  -2   7   1 967.491  71.674   1
   1  -7  -1 630.586  29.439   1
   1  -7  -1 560.806  41.095   4
   1  -7  -1 647.454  48.207   1
   1  -7  -1 590.928  33.489   7
  -1   7   1 574.005  29.166   1
  -1   7   1 605.669  49.269   1
  -1   7   1 578.051  30.660   3
   0  -7  -1 479.271  34.413   4
   0  -7  -1 499.356  30.946   1
   0  -7  -1 514.270  25.546   7
   0  -7  -1 498.694  29.721   1
   0   7   1 494.907  43.397   1
   0   7   1 524.687  21.798   1
   0   7   1 492.600  32.934   3
  -1  -7  -1 87.1503 10.9771   7
  -1  -7  -1 84.2521  9.2197   4
  -1  -7  -1 67.1547  8.5713   1
  -1  -7  -1 72.9839  6.5268   1
   1   7   1 82.2243 10.5276   1
   1   7   1 68.8930  7.5459   1
  -2  -7  -1 312.939  32.049   7
  -2  -7  -1 394.637  23.852   1
  -2  -7  -1 379.455  29.656   4
  -2  -7  -1 416.586  36.475   1
   2   7   1 349.910  22.693   1
   2   7   1 409.671  26.621   1
  -3  -7  -1 506.583  25.588   1
  -3  -7  -1 457.367  36.664   1
  -3  -7  -1 491.678  65.358   4
   3   7   1 512.005  33.866   6
   3   7   1 424.973  41.402   7
   3   7   1 462.395  28.395   1
   3   7   1 446.613  32.951   1
  -4  -7  -1 257.176  17.417   1
  -4  -7  -1 234.678  33.033   4
  -4  -7  -1 218.078  29.933   1
   4   7   1 265.302  21.444   1
   4   7   1 287.920  22.190   6
   4   7   1 239.723  21.587   1
   4   7   1 282.200  28.159   7
  -5  -7  -1 340.948  24.324   1
  -5  -7  -1 353.280  34.092   1
  -5  -7  -1 379.252  46.946   4
   5   7   1 376.128  30.750   1
   5   7   1 341.386  30.874   6
   5   7   1 378.867  41.191   1
   5   7   1 302.903  28.378   7
  -6  -7  -1 175.777  17.993   1
  -6  -7  -1 170.401  13.175   1
   6   7   1 139.197  16.303   1
   6   7   1 125.460  16.243   1
   6   7   1 153.158  16.968   6
  -7  -7  -1 6.55955 2.90840   1
   7   7   1 -10.261   8.601   6
   7   7   1 3.08262 4.01739   1
  -8  -7  -1 106.565  11.679   1
   8   7   1 84.5913 16.1121   2
   9  -8  -1 45.4606 12.1822   1
  -9   8   1 40.1487 13.6658   1
   8  -8  -1 60.1805 11.3992   1
  -8   8   1 83.7934 16.0615   1
   7  -8  -1 51.1024 10.8428   1
   7  -8  -1 27.5749 10.9865   4
  -7   8   1 58.5602 11.3085   1
   6  -8  -1 33.0111  8.6200   1
   6  -8  -1 33.9048 10.2846   4
  -6   8   1 26.9845  6.9651   1
   5  -8  -1 155.693  17.858   1
   5  -8  -1 111.408  17.744   4
   5  -8  -1 160.780  19.770   1
  -5   8   1 152.731  18.625   1
   4  -8  -1 561.802  45.774   4
   4  -8  -1 547.435  52.782   1
   4  -8  -1 536.224  50.594   1
  -4   8   1 571.073  46.654   1
  -4   8   1 495.267  39.875   1
   3  -8  -1 1184.92   62.45   1
   3  -8  -1 1190.05   91.10   1
   3  -8  -1 1176.72  100.85   4
  -3   8   1 1133.27   79.92   1
  -3   8   1 1197.80   77.85   1
   2  -8  -1 357.756  40.154   4
   2  -8  -1 286.116  24.621   7
   2  -8  -1 361.238  27.768   1
   2  -8  -1 301.940  28.031   1
  -2   8   1 297.060  21.456   1
  -2   8   1 356.426  17.934   1
   1  -8  -1 18.3000  5.0844   1
   1  -8  -1 15.0656  8.9206   4
   1  -8  -1 23.8659  6.7930   7
   1  -8  -1 9.65471 5.76434   1
  -1   8   1 8.08567 4.84319   1
  -1   8   1 6.34878 4.60031   1
  -1   8   1 17.9302  3.0656   3
   0  -8  -1 -0.6592  6.9293   4
   0  -8  -1 -0.4729  4.8577   7
   0  -8  -1 -0.4228  3.8415   1
   0  -8  -1 -0.5651  2.5794   1
   0   8   1 -1.2158  3.0440   3
   0   8   1 1.15336 3.95186   1
   0   8   1 -0.3389  3.6203   1
  -1  -8  -1 315.170  31.743   1
  -1  -8  -1 236.162  21.632   7
  -1  -8  -1 297.326  17.404   1
  -1  -8  -1 284.375  30.143   4
   1   8   1 288.640  26.550   3
   1   8   1 282.508  31.736   1
   1   8   1 327.566  25.136   1
  -2  -8  -1 1772.89  111.50   4
  -2  -8  -1 1715.35  139.40   7
  -2  -8  -1 1818.24  125.15   1
  -2  -8  -1 1731.70  126.03   1
   2   8   1 1870.34  174.37   1
   2   8   1 1722.91  122.61   6
   2   8   1 1779.98  137.01   1
  -3  -8  -1 7.25551 3.55836   1
  -3  -8  -1 10.5825  3.2230   1
  -3  -8  -1 3.26230 4.89159   4
   3   8   1 7.62782 4.29017   1
   3   8   1 18.0306  8.6688   6
   3   8   1 7.15359 4.96544   1
  -4  -8  -1 57.2306  8.4095   1
  -4  -8  -1 44.7038  8.6371   1
  -4  -8  -1 46.5301 11.4020   4
   4   8   1 60.3749  9.5798   1
   4   8   1 59.8869 12.5967   6
   4   8   1 40.3542  6.0182   1
  -5  -8  -1 -0.4036  3.6549   1
  -5  -8  -1 -2.1841  5.7081   4
  -5  -8  -1 4.36815 3.57577   1
   5   8   1 -2.2595  7.0797   6
   5   8   1 -2.6342  3.6664   1
   6   8   1 8.59134 8.15057   6
   6   8   1 -0.1502  3.6483   1
  -7  -8  -1 49.0096  7.0245   1
   7   8   1 26.9520 13.5509   6
   8  -9  -1 84.9598 13.9644   1
  -8   9   1 69.2234 15.7433   1
   7  -9  -1 -4.4684 11.0856   1
  -7   9   1  1.1815 12.7664   1
   6  -9  -1 23.8437  9.8700   1
  -6   9   1 13.0997  9.0920   1
   5  -9  -1 12.3627  7.5614   1
   5  -9  -1 -2.1834 11.7265   1
  -5   9   1 2.10248 7.89941   1
   4  -9  -1 358.759  39.829   1
   4  -9  -1 312.484  42.184   1
  -4   9   1 375.212  40.404   1
   3  -9  -1 12.8603  6.2644   1
   3  -9  -1 28.4531  9.0685   1
   3  -9  -1 12.1803  6.3597   7
  -3   9   1 11.4254  6.9595   1
   2  -9  -1 32.5044  8.8927   1
   2  -9  -1 46.5085  8.7391   1
   2  -9  -1 37.3962  6.7962   7
  -2   9   1 41.6903  7.8420   1
   1  -9  -1 78.8192 11.3704   1
   1  -9  -1 100.351  12.464   1
   1  -9  -1 84.4383 10.0216   7
  -1   9   1 114.828  10.923   1
  -1   9   1 101.265   7.703   3
   0  -9  -1 510.543  57.108   1
   0  -9  -1 475.177  65.865   4
   0  -9  -1 485.200  52.503   1
   0  -9  -1 531.666  52.994   7
   0   9   1 519.952  49.685   3
   0   9   1 492.986  37.700   1
   0   9   1 449.204  30.995   1
  -1  -9  -1 187.911  18.319   1
  -1  -9  -1 150.090  40.266   4
  -1  -9  -1 158.988  20.021   7
  -1  -9  -1 150.308  14.299   1
   1   9   1 167.251  17.537   1
   1   9   1 147.252  14.178   1
   1   9   1 162.324  15.851   3
  -2  -9  -1 82.7754 10.7539   1
  -2  -9  -1 68.5609  8.5045   1
   2   9   1 52.6197  9.2452   1
   2   9   1 68.9697 10.9835   6
   2   9   1 61.6808  8.8531   1
  -3  -9  -1 32.1083  6.9271   1
  -3  -9  -1 14.2160  4.9377   1
   3   9   1 16.2869  4.7359   1
   3   9   1 33.4573  8.8116   6
   3   9   1 8.53853 5.51338   1
  -4  -9  -1 115.683  15.353   1
   4   9   1 107.545  12.955   6
   4   9   1 101.486  12.197   1
  -5  -9  -1 208.065  32.593   1
   5   9   1 179.882  26.141   6
   6   9   1 40.5290 12.4086   6
   6 -10  -1 19.4676  9.7315   1
  -6  10   1  8.2949 10.6481   1
   5 -10  -1 7.40072 7.71470   1
  -5  10   1 9.10806 8.17965   1
   4 -10  -1 78.3424 13.3043   1
   4 -10  -1 119.738  12.693   1
  -4  10   1 108.023  13.718   1
   3 -10  -1 268.902  33.310   1
   3 -10  -1 351.306  40.188   7
   3 -10  -1 323.788  39.858   1
  -3  10   1 309.090  32.538   1
   2 -10  -1 10.6977  7.2848   1
   2 -10  -1 21.6035  8.5468   7
   2 -10  -1 15.4988  7.7579   1
  -2  10   1 17.4852  7.2932   1
   1 -10  -1 37.8832  9.7534   7
   1 -10  -1 24.1960  9.8932   1
   1 -10  -1 35.3165  9.6246   1
  -1  10   1 35.4222  9.6621   1
   0 -10  -1 21.2659  5.9763   1
   0 -10  -1 4.43423 6.70818   1
   0 -10  -1 21.7421  9.5291   7
   0  10   1 17.1251  8.1385   1
  -1 -10  -1 106.020  15.101   7
  -1 -10  -1 93.5994  9.3353   1
   1  10   1 86.8173 11.9866   3
   1  10   1 88.1638 16.8686   1
  -2 -10  -1 23.6639  7.8172   1
   2  10   1 12.2246 11.4988   6
   2  10   1 15.2556  8.9950   3
  -3 -10  -1 25.2197  7.2117   1
   3  10   1 14.0443 10.3780   6
   3  10   1 21.0900  8.3859   3
  -4 -10  -1 46.5695 10.7118   1
   4  10   1 40.9898 10.2807   6
   4 -11  -1 1.65198 6.84933   1
   4 -11  -1  8.1499 10.5243   7
  -4  11   1 -6.7833  8.3944   1
   3 -11  -1 52.5546 14.2178   1
   3 -11  -1 63.6314 12.2488   7
  -3  11   1 63.5377 17.7049   1
   2 -11  -1 355.398  66.231   1
   2 -11  -1 388.797  45.067   7
  -2  11   1 394.045  43.883   1
   1 -11  -1 22.4214  9.9386   7
   1 -11  -1 18.1520  6.5474   1
  -1  11   1 17.9146  8.0606   1
   0 -11  -1 21.5360  6.6594   1
   0 -11  -1 4.34517 8.59313   7
  -1 -11  -1 19.2589  7.4629   1
  -1 -11  -1 21.5687  8.7377   7
   1  11   1  7.8467 10.7378   6
  -2 -11  -1 0.35450 4.17007   1
   2  11   1 2.54557 9.61269   6
   0  10  -2  8.9324 10.5167   6
   0 -10   2 13.6519  6.8529   1
  -1  10  -2 72.1121 14.2551   6
  -1  10  -2 66.3120 16.6635   1
   1 -10   2 76.9374 15.1313   7
   1 -10   2 61.3462 13.2377   1
  -2  10  -2 -8.6639  8.1131   1
   2 -10   2 7.71464 6.90796   1
   2 -10   2 4.44409 5.35903   7
  -3  10  -2 10.6420 13.6993   1
   3 -10   2 -9.4320  7.0736   7
   3 -10   2 -9.8395 10.1366   1
  -4  10  -2 37.0481 11.5557   1
   4 -10   2 67.5894 15.7727   7
   4 -10   2 63.1913 15.2090   1
  -5  10  -2 19.5479 14.0923   1
   5 -10   2 8.36347 8.22149   7
   3   9  -2  8.7291 10.0093   6
  -3  -9   2 0.21757 5.20399   1
   2   9  -2 62.4660 14.2644   6
  -2  -9   2 58.8962  9.8980   1
   1   9  -2 282.192  31.945   6
   1   9  -2 257.868  30.527   1
  -1  -9   2 306.990  37.647   1
   0   9  -2 1.45287 8.08957   1
   0   9  -2 -3.4515  6.0296   6
   0  -9   2 7.49978 8.38801   1
   0  -9   2 -3.8707  5.2783   7
   0  -9   2 -8.4071  9.7155   1
  -1   9  -2 104.169  15.876   1
  -1   9  -2 100.649  16.389   6
   1  -9   2 71.7973 15.4421   1
   1  -9   2 81.1625 13.1449   7
   1  -9   2 57.5306 10.1026   1
  -2   9  -2 212.726  21.214   1
   2  -9   2 183.649  25.578   1
   2  -9   2 246.387  36.112   7
   2  -9   2 234.127  24.856   1
  -3   9  -2 55.7715 14.2743   1
   3  -9   2 88.4672 11.8698   7
   3  -9   2 97.2972 14.7936   1
   3  -9   2 128.295  18.905   1
  -4   9  -2 62.1486 16.9708   1
   4  -9   2 58.4369  9.8226   7
   4  -9   2 69.8553 14.2568   1
  -5   9  -2 12.2699  8.1714   1
   5  -9   2 26.4819  9.7348   1
   5  -9   2 27.4507  7.4636   7
  -6   9  -2 83.3783 19.2902   1
   6  -9   2 108.586  20.219   1
  -7   9  -2 171.092  25.521   1
   7  -9   2 187.876  23.301   1
   4   8  -2 18.3852  9.4793   6
  -4  -8   2 6.03114 4.74790   1
   3   8  -2 14.5790  8.7889   1
   3   8  -2 25.6090 12.4177   6
  -3  -8   2 25.2170  7.4701   1
   2   8  -2 43.7170  9.4284   6
   2   8  -2 41.8871  8.8592   1
  -2  -8   2 32.9161  9.8788   1
  -2  -8   2 50.2681  7.8629   1
   1   8  -2 106.448  11.916   1
   1   8  -2 112.784  12.441   6
  -1  -8   2 109.934  11.494   1
  -1  -8   2 100.977  16.360   1
   0   8  -2 108.439  12.894   1
   0   8  -2 115.031  11.930   6
   0  -8   2 138.879  16.179   7
   0  -8   2 128.495  15.429   1
   0  -8   2 108.848  15.851   1
  -1   8  -2 94.4613 13.4446   1
   1  -8   2 104.338  12.671   7
   1  -8   2 104.384  10.940   1
   1  -8   2 94.4624 13.5911   1
  -2   8  -2 145.704  17.581   1
  -2   8  -2 166.198  27.969   3
   2  -8   2 157.502  13.888   7
   2  -8   2 188.431  23.288   1
   2  -8   2 158.296  18.880   1
  -3   8  -2 146.567  15.227   1
   3  -8   2 125.335  21.349   1
   3  -8   2 137.991  17.867   1
   3  -8   2 89.2863 14.6722   7
  -4   8  -2 75.5179 11.3279   1
   4  -8   2 87.4977 16.8573   1
   4  -8   2 98.4723 13.8068   1
  -5   8  -2 22.3642  8.1108   1
   5  -8   2 37.5712  9.3152   1
  -6   8  -2 217.653  24.324   1
   6  -8   2 226.398  22.477   1
  -7   8  -2 309.385  28.457   1
   7  -8   2 324.074  34.449   1
  -8   8  -2 11.2628  8.3694   1
   8  -8   2 -8.1977  7.8063   1
  -6  -7   2 123.385  15.330   1
   5   7  -2 37.4104 12.8554   6
  -5  -7   2 23.4139  7.3655   1
   4   7  -2 163.587  18.905   6
   4   7  -2 167.036  14.933   1
  -4  -7   2 153.792  16.831   4
  -4  -7   2 163.910  25.220   1
  -4  -7   2 167.960  17.841   1
   3   7  -2 594.792  40.317   1
   3   7  -2 569.926  40.096   6
  -3  -7   2 525.700  56.136   1
  -3  -7   2 553.236  43.340   4
  -3  -7   2 593.572  43.673   1
   2   7  -2 37.1278  7.8189   1
   2   7  -2 43.0328 10.6833   6
   2   7  -2 39.7874  7.8424   1
  -2  -7   2 67.8014 11.0973   1
  -2  -7   2 78.0460 12.8781   4
  -2  -7   2 46.8527  8.4402   1
   1   7  -2 21.9555  7.2829   1
   1   7  -2 14.4046  8.1091   6
   1   7  -2 4.53632 5.16488   1
  -1  -7   2 20.0538  6.8822   1
  -1  -7   2 29.8483 10.6319   4
  -1  -7   2 41.1788  8.6688   1
   0   7  -2 78.7793 12.8608   1
   0   7  -2 116.660  12.263   6
   0   7  -2 88.2644 11.6365   1
   0  -7   2 85.4618 11.8802   7
   0  -7   2 115.175  13.320   4
   0  -7   2 84.6982 11.5383   1
   0  -7   2 86.8283 12.2228   1
  -1   7  -2 46.6852  9.0710   1
  -1   7  -2 42.3883 11.1549   1
   1  -7   2 37.7163  7.5011   1
   1  -7   2 65.2410 11.9305   1
   1  -7   2 49.3058  9.2083   4
   1  -7   2 48.3988  7.0045   7
  -2   7  -2 18.2733  7.3468   1
  -2   7  -2 39.3491  8.4764   1
   2  -7   2 47.4866  7.8059   1
   2  -7   2 33.7628  5.6722   7
   2  -7   2 28.0573  7.6387   4
   2  -7   2 40.9689  8.3575   1
  -3   7  -2 137.863  17.104   1
  -3   7  -2 121.955  16.484   1
   3  -7   2 118.189  15.543   7
   3  -7   2 129.655  14.766   1
   3  -7   2 84.1375 16.7324   4
   3  -7   2 143.014  16.591   1
  -4   7  -2 45.3041 11.4960   1
  -4   7  -2 45.7806  7.0287   1
   4  -7   2 39.0994  7.6394   1
   4  -7   2 50.5568  7.7013   1
   4  -7   2 34.5167  7.8674   4
  -5   7  -2 43.7129 12.0491   1
  -5   7  -2 71.4762 12.6583   1
   5  -7   2 88.1627 15.7916   1
   5  -7   2 77.2527 12.6596   1
   5  -7   2 46.6559 14.1124   4
  -6   7  -2 156.658  17.531   1
   6  -7   2 157.244  18.103   1
   6  -7   2 114.813  13.132   4
   6  -7   2 156.783  24.041   1
  -7   7  -2 142.578  16.630   1
   7  -7   2 106.026  14.302   1
  -8   7  -2 65.2122 13.5999   1
   8  -7   2 80.9674 15.4961   1
  -9   7  -2 -4.7707  8.9133   1
   9  -7   2 18.8349 10.6280   1
  -7  -6   2 479.639  60.885   1
  -6  -6   2 -2.6813  4.3327   1
   5   6  -2 16.3659  8.9985   6
   5   6  -2 8.77483 5.36727   1
  -5  -6   2 11.7886  6.6818   4
  -5  -6   2 13.0098  6.0487   1
  -5  -6   2 13.7386  4.4385   1
   4   6  -2 754.463  65.450   1
   4   6  -2 682.297  45.689   1
   4   6  -2 722.609  68.575   7
   4   6  -2 682.148  54.754   6
  -4  -6   2 731.903  41.167   1
  -4  -6   2 649.862  54.621   1
  -4  -6   2 683.793  50.811   4
   3   6  -2 1422.54   94.42   1
   3   6  -2 1567.40  112.42   7
   3   6  -2 1509.14   91.67   1
   3   6  -2 1514.18   99.34   6
  -3  -6   2 1519.45   77.58   1
  -3  -6   2 1512.75  105.97   1
  -3  -6   2 1533.02  109.43   4
   2   6  -2 1015.05   74.27   6
   2   6  -2 983.127  88.533   1
   2   6  -2 1108.99   71.77   1
  -2  -6   2 1056.84   78.29   4
  -2  -6   2 1011.30   73.70   1
  -2  -6   2 1050.65   58.99   1
   1   6  -2 19.2028  5.0846   6
   1   6  -2 14.6473  5.0174   1
  -1  -6   2 20.5224  5.0959   1
  -1  -6   2 13.0352  4.1636   1
  -1  -6   2 8.23614 5.09311   4
   0   6  -2 -3.7944  3.0900   1
   0   6  -2 2.09288 5.00487   1
   0   6  -2 -1.2551  4.3619   6
   0  -6   2 0.33364 3.31362   1
   0  -6   2 4.72586 3.00043   7
   0  -6   2 5.87158 4.81334   1
   0  -6   2 7.30599 4.36957   4
  -1   6  -2 19.0730  4.8497   1
  -1   6  -2 17.8582  5.2263   1
   1  -6   2 4.25011 4.14109   1
   1  -6   2 12.8333  3.6318   7
   1  -6   2 16.3193  5.9271   1
   1  -6   2 10.3619  4.2527   4
  -2   6  -2 43.2302  6.2786   1
  -2   6  -2 39.1318  7.8282   1
   2  -6   2 26.1795  9.0946   1
   2  -6   2 38.4184  6.1855   1
   2  -6   2 51.8273  6.4218   7
  -3   6  -2 28.2167  7.4924   1
  -3   6  -2 25.1076  6.4249   1
   3  -6   2 32.1941  4.8779   1
   3  -6   2 26.5351  6.1694   1
  -4   6  -2 59.1262 10.0228   1
  -4   6  -2 53.9220  8.9441   1
   4  -6   2 53.9342  7.9319   1
   4  -6   2 47.2965  9.2829   1
  -5   6  -2 191.573  20.806   1
  -5   6  -2 151.710  14.755   1
   5  -6   2 158.904  16.495   1
   5  -6   2 155.921  14.984   1
  -6   6  -2 39.3415  7.6653   1
  -6   6  -2 25.8397  8.2214   1
   6  -6   2 36.5496  8.3386   1
   6  -6   2 47.8540  8.9311   1
  -7   6  -2 142.967  19.658   1
  -7   6  -2 139.471  14.885   1
   7  -6   2 146.273  19.138   1
  -8   6  -2 7.85916 7.01994   1
   8  -6   2 -1.2972  6.4354   4
   8  -6   2 4.18459 6.67724   1
  -9   6  -2 61.8648 12.3311   1
  -9   6  -2 53.0580  7.4424   5
   9  -6   2 35.5572 12.8585   4
   9  -6   2 62.9177 13.3132   1
 -10   6  -2 21.4891 10.5514   1
  10  -6   2 2.28157 8.76074   1
   8   5  -2 144.648  25.237   2
  -8  -5   2 174.993  25.318   1
  -7  -5   2 -2.3615  6.2951   1
   6   5  -2 -1.3638  4.2021   1
  -6  -5   2 0.03654 3.56502   1
  -6  -5   2 -2.6213  6.9661   1
  -6  -5   2 -2.5045  4.0504   4
   5   5  -2 1.64632 4.04990   1
   5   5  -2 -4.6753  5.5107   6
   5   5  -2 1.37729 6.54912   1
   5   5  -2 4.54934 6.35280   7
  -5  -5   2 9.94048 5.96118   1
  -5  -5   2 1.89045 3.67327   4
  -5  -5   2 -1.2171  3.5917   1
   4   5  -2 48.3844 10.9800   7
   4   5  -2 23.0463  5.1017   1
   4   5  -2 50.4889 10.5841   6
  -4  -5   2 39.8087  5.6611   1
  -4  -5   2 32.3498  7.1909   1
  -4  -5   2 40.6696  7.0716   4
   3   5  -2 2114.28   92.76   1
   3   5  -2 1985.94  107.46   6
   3   5  -2 2099.23  166.51   7
   3   5  -2 1998.34  132.38   1
  -3  -5   2 1958.59  159.36   1
  -3  -5   2 2158.79  198.25   4
  -3  -5   2 1921.02  131.10   1
   2   5  -2 1209.16  102.78   7
   2   5  -2 1289.35   48.25   1
   2   5  -2 1282.28   64.65   6
   2   5  -2 1292.42   73.76   1
  -2  -5   2 1257.00   60.47   1
  -2  -5   2 1420.68  100.81   4
  -2  -5   2 1230.01   94.80   1
   1   5  -2 44.4832  6.4562   1
   1   5  -2 38.1723  5.4322   1
   1   5  -2 43.5304 10.2077   6
  -1  -5   2 26.6028  5.0847   1
  -1  -5   2 37.8441  6.5594   4
  -1  -5   2 42.1960  7.4387   1
   0   5  -2 44.4569  6.9826   1
   0   5  -2 45.7816  7.3765   1
   0   5  -2 52.3388  6.9589   6
   0  -5   2 63.1613  8.1716   1
   0  -5   2 36.3636  6.1120   7
  -1   5  -2 3.64597 3.30502   1
  -1   5  -2 -1.2472  3.4756   1
   1  -5   2 6.83596 3.35817   1
   1  -5   2 1.54476 3.45638   7
   1  -5   2 17.3339  6.3651   1
  -2   5  -2 977.844  55.946   1
  -2   5  -2 955.471  75.305   1
   2  -5   2 1069.92   93.81   7
   2  -5   2 987.747  42.970   1
   2  -5   2 1020.02   44.66   1
  -3   5  -2 112.748  13.008   1
  -3   5  -2 95.0235  3.5055   3
  -3   5  -2 135.600  12.360   1
   3  -5   2 111.856  10.307   1
  -4   5  -2 20.6510  5.8675   1
  -4   5  -2 7.32101 4.39119   1
   4  -5   2 8.74396 3.60634   1
   4  -5   2 3.04072 3.91201   1
  -5   5  -2 244.044  26.667   1
  -5   5  -2 242.598  20.213   1
   5  -5   2 211.346  19.947   1
   5  -5   2 205.536  14.996   1
  -6   5  -2 15.2890  6.8282   1
  -6   5  -2 6.41323 6.12291   1
   6  -5   2 14.8558  6.0946   1
   6  -5   2 5.51964 5.68503   1
  -7   5  -2 177.262  17.243   1
  -7   5  -2 187.600  19.079   1
   7  -5   2 203.153  22.059   1
   7  -5   2 186.604  24.517   1
  -8   5  -2 613.661  74.592   1
  -8   5  -2 664.346  47.763   1
   8  -5   2 561.084  71.878   1
  -9   5  -2 425.141  37.213   2
  -9   5  -2 398.798  46.775   1
  -9   5  -2 456.182  30.211   1
  -9   5  -2 405.916  56.388   5
   9  -5   2 458.253  39.988   1
   9  -5   2 425.130  28.729   3
   9  -5   2 396.072  34.983   4
 -10   5  -2 357.963  31.551   1
  10  -5   2 313.782  36.918   3
  10  -5   2 381.443  27.137   1
 -11   5  -2 15.3306 11.3791   1
  11  -5   2 -6.5546 12.8261   1
   8   4  -2 6.25175 7.00080   2
  -8  -4   2 25.1454  7.2598   1
   7   4  -2 1.84306 7.30401   1
  -7  -4   2 -1.3688  4.6513   1
  -7  -4   2 -0.6580  3.4638   1
   6   4  -2 -5.7477  5.5236   7
   6   4  -2 -6.3699  4.2585   1
   6   4  -2 -0.5006  4.7403   1
  -6  -4   2 -0.6978  3.7777   1
  -6  -4   2 -1.5238  3.7784   1
  -6  -4   2 1.66628 1.72751   4
   5   4  -2 70.7841 10.1234   7
   5   4  -2 75.2303 10.2835   1
   5   4  -2 67.7066  8.6564   1
  -5  -4   2 69.6034  7.3550   4
  -5  -4   2 80.6669  9.0844   1
  -5  -4   2 83.9035  8.6613   1
   4   4  -2 38.7232  7.4048   7
   4   4  -2 29.9801  6.1240   1
   4   4  -2 23.7134  6.7432   1
   4   4  -2 28.1651  7.5148   6
  -4  -4   2 42.6950  6.2916   1
  -4  -4   2 47.4126  6.9174   1
  -4  -4   2 43.0037  5.5582   4
   3   4  -2 627.111  28.287   1
   3   4  -2 713.001  45.208   1
   3   4  -2 684.810  27.160   6
   3   4  -2 661.399  46.017   7
  -3  -4   2 677.258  45.173   1
  -3  -4   2 629.805  27.195   1
  -3  -4   2 700.520  43.980   4
   2   4  -2 8.83219 4.33406   7
   2   4  -2 10.5506  4.5240   1
   2   4  -2 15.8844  5.2595   1
   2   4  -2 9.87070 4.47685   6
  -2  -4   2 13.1085  3.0574   4
  -2  -4   2 3.96753 3.93291   1
  -2  -4   2 15.6576  4.7740   1
   1   4  -2 50.8816  5.7513   7
   1   4  -2 46.6335  5.7126   1
   1   4  -2 41.5909  4.7898   1
   1   4  -2 38.5790  5.3381   6
  -1  -4   2 53.3276  6.3726   1
  -1  -4   2 37.7389  5.9724   1
   0   4  -2 675.656  37.419   1
   0   4  -2 677.293  30.197   1
   0   4  -2 666.397  38.817   6
   0  -4   2 651.078  31.773   1
   0  -4   2 732.481  48.515   1
   0  -4   2 710.368  37.858   7
  -1   4  -2 1885.49   78.46   1
  -1   4  -2 2003.43   79.17   1
   1  -4   2 1869.27   75.56   1
   1  -4   2 2070.81  107.68   7
   1  -4   2 1999.12   68.71   1
  -2   4  -2 5771.35  383.21   1
  -2   4  -2 5957.96  300.48   1
   2  -4   2 5761.38  224.09   1
   2  -4   2 5892.56  247.95   1
  -3   4  -2 9.35413 1.05777   3
  -3   4  -2 9.65627 4.26139   1
  -3   4  -2 18.0554  4.2834   1
   3  -4   2 14.2383  4.8323   1
  -4   4  -2 28.3343  5.4829   1
  -4   4  -2 25.7334  4.8231   1
   4  -4   2 43.5603  6.9146   1
   4  -4   2 34.0702  7.2103   1
  -5   4  -2 145.272  13.669   1
  -5   4  -2 140.049  14.006   1
   5  -4   2 135.195  12.864   1
   5  -4   2 128.132  12.790   1
  -6   4  -2 924.298  52.599   1
  -6   4  -2 886.832  50.243   1
   6  -4   2 819.004  52.781   1
   6  -4   2 818.904  71.904   1
  -7   4  -2 37.3834  6.3274   1
  -7   4  -2 32.3515  6.6438   1
   7  -4   2 60.2014  8.8365   1
   7  -4   2 39.6271  4.8407   3
   7  -4   2 61.0507  8.0767   1
  -8   4  -2 20.0659  6.9118   1
  -8   4  -2 8.71862 6.14348   1
  -8   4  -2 21.5721  3.4986   5
   8  -4   2 20.8812  4.1008   3
   8  -4   2 13.9755  6.7613   1
   8  -4   2 30.3024  6.1164   1
  -9   4  -2 5.46071 6.88978   2
  -9   4  -2 12.5485  2.9143   5
  -9   4  -2 11.1120  6.8465   1
  -9   4  -2 14.9616  6.0916   1
   9  -4   2 11.9569  5.8366   1
   9  -4   2 13.0197  4.0864   3
 -10   4  -2 286.681  23.732   2
 -10   4  -2 269.788  28.595   1
 -10   4  -2 301.018  23.946   1
  10  -4   2 316.796  23.583   3
  10  -4   2 263.628  22.519   4
  10  -4   2 349.401  25.964   1
 -11   4  -2 464.291  41.772   1
  11  -4   2 487.295  43.724   3
  11  -4   2 460.377  37.249   1
   9   3  -2 5.34291 6.22092   2
  -9  -3   2 30.8795  8.0452   1
   8   3  -2 15.2933  6.9372   2
   8   3  -2 3.18117 5.11285   1
  -8  -3   2 12.7315  4.9272   1
   7   3  -2 32.5903  9.1264   2
   7   3  -2 28.9835  7.1182   1
  -7  -3   2 24.9216  6.2815   1
  -7  -3   2 19.8368  9.2544   1
   6   3  -2 5.93413 5.56866   1
   6   3  -2 6.85452 4.40718   1
  -6  -3   2 2.92051 4.39689   1
  -6  -3   2 0.79380 6.02455   6
  -6  -3   2 17.2095  4.9085   1
   5   3  -2 9.33995 4.04143   1
   5   3  -2 0.87146 3.24019   1
  -5  -3   2 6.83012 2.67695   4
  -5  -3   2 5.79408 5.68945   1
  -5  -3   2 6.76419 4.06169   1
  -5  -3   2 7.44734 6.39510   6
   4   3  -2 3.43648 2.74937   1
   4   3  -2 4.97364 3.63828   1
  -4  -3   2 4.45870 3.95337   1
  -4  -3   2 2.10368 4.10310   6
  -4  -3   2 1.24310 2.21087   1
  -4  -3   2 4.49680 2.32169   4
   3   3  -2 97.8585  8.6706   7
   3   3  -2 103.739   8.781   6
   3   3  -2 112.547   9.703   1
  -3  -3   2 91.2720 10.5865   6
  -3  -3   2 105.032   8.804   1
  -3  -3   2 80.6466  5.8836   4
  -3  -3   2 95.3809  7.0193   1
   2   3  -2 34.9608  4.6282   7
   2   3  -2 26.8507  4.8999   1
   2   3  -2 24.3606  4.6751   6
  -2  -3   2 21.9126  5.0246   1
  -2  -3   2 20.9720  4.2235   1
   1   3  -2 42.8739  5.0350   7
   1   3  -2 33.3314  5.5201   1
   1   3  -2 36.4863  4.3833   1
   1   3  -2 56.7099  7.4005   6
  -1  -3   2 34.4230  5.0470   1
  -1  -3   2 47.9089  4.8096   1
   0   3  -2 2636.85  117.14   1
   0   3  -2 2513.97   84.37   1
   0   3  -2 2501.12  154.38   6
   0  -3   2 2656.53  160.28   1
   0  -3   2 2497.95   98.82   1
   0  -3   2 2619.19  131.57   7
  -1   3  -2 168.037  11.955   1
  -1   3  -2 171.256  13.139   1
   1  -3   2 179.253  11.812   7
   1  -3   2 199.143  14.124   1
   1  -3   2 166.525  10.877   1
  -2   3  -2 35.1038  5.0583   1
  -2   3  -2 29.6896  4.5450   1
   2  -3   2 33.6735  4.7481   1
   2  -3   2 28.1501  4.8804   1
  -3   3  -2 1.92828 3.21276   1
  -3   3  -2 3.68311 1.00607   3
  -3   3  -2 1.12239 2.64993   1
   3  -3   2 -0.1140  2.9339   1
   3  -3   2 3.48332 2.78964   1
  -4   3  -2 168.789  11.887   1
  -4   3  -2 138.976  10.371   1
   4  -3   2 155.611   9.697   1
   4  -3   2 161.815  12.354   1
  -5   3  -2 80.0785  8.7922   1
  -5   3  -2 87.0439  9.4082   1
   5  -3   2  99.999  11.554   1
   5  -3   2 83.3524  5.5835   3
   5  -3   2 79.6085  8.8780   1
  -6   3  -2 203.796  19.588   1
  -6   3  -2 201.323  19.135   1
   6  -3   2 238.422  13.368   3
   6  -3   2 238.774  15.454   1
   6  -3   2 268.754  19.274   1
  -7   3  -2 35.6175  6.6467   1
  -7   3  -2 21.1117  3.9523   5
  -7   3  -2 8.49282 4.35334   1
   7  -3   2 15.3478  4.8059   1
   7  -3   2 18.9524  7.3675   1
   7  -3   2 13.9202  3.7869   3
  -8   3  -2 6.39606 7.96728   1
  -8   3  -2 24.5606  3.7870   5
  -8   3  -2 20.1699  5.5183   1
  -8   3  -2 11.5183  5.3107   2
   8  -3   2 11.5749  6.3226   1
   8  -3   2 15.8038  4.0055   3
   8  -3   2 14.0260  7.9474   1
  -9   3  -2 438.400  30.520   1
  -9   3  -2 497.474  48.230   1
  -9   3  -2 415.386  35.055   2
   9  -3   2 428.531  27.254   1
   9  -3   2 411.609  54.807   3
 -10   3  -2 42.6524  9.6230   1
 -10   3  -2 34.2257  9.1885   1
 -10   3  -2 27.7595 10.8005   2
  10  -3   2 26.9446  5.5774   3
  10  -3   2 32.6376  6.3436   4
  10  -3   2 41.8159  9.5026   1
 -11   3  -2 349.209  34.864   1
  11  -3   2 325.668  26.580   1
  11  -3   2 374.926  35.367   3
   9   2  -2 5.34165 8.78162   2
  -9  -2   2 4.38710 5.22967   1
   8   2  -2 6.43669 6.87803   1
   8   2  -2 -1.1853  7.1286   2
   8   2  -2 5.29259 4.48192   5
  -8  -2   2 -0.3701  6.5593   1
  -8  -2   2 4.47292 5.31928   1
   7   2  -2 854.714  59.170   1
   7   2  -2 763.982  81.236   1
   7   2  -2 859.167  89.190   2
  -7  -2   2 888.822  53.633   1
  -7  -2   2 826.424  88.020   1
  -7  -2   2 769.942  90.878   6
   6   2  -2 15.0338  4.4407   1
   6   2  -2 2.55533 4.35716   1
  -6  -2   2 1.72221 7.10119   6
  -6  -2   2 8.89322 4.98889   1
  -6  -2   2 9.15315 4.22588   1
   5   2  -2 562.265  45.454   1
   5   2  -2 527.472  28.902   1
  -5  -2   2 586.003  41.220   1
  -5  -2   2 620.500  44.820   6
  -5  -2   2 561.139  38.678   4
  -5  -2   2 510.070  42.157   1
   4   2  -2 412.501  30.434   1
   4   2  -2 373.755  13.345   1
  -4  -2   2 386.280  20.347   4
  -4  -2   2 379.573  27.222   1
  -4  -2   2 370.726  19.660   1
  -4  -2   2 397.043  40.348   6
   3   2  -2 1433.46   87.28   1
   3   2  -2 1439.46   53.56   1
  -3  -2   2 1389.78   73.54   1
  -3  -2   2 1512.16   80.63   4
  -3  -2   2 1413.83   61.15   1
  -3  -2   2 1413.91   87.04   6
   2   2  -2 2835.38  129.43   1
   2   2  -2 3057.04  108.25   6
   2   2  -2 2905.13  113.60   1
  -2  -2   2 2937.56  125.19   1
  -2  -2   2 2955.63  123.15   1
  -2  -2   2 2881.86  143.49   6
   1   2  -2 21.7242  4.1708   1
   1   2  -2 27.0836  3.8893   6
   1   2  -2 21.8211  3.0149   7
   1   2  -2 25.4619  3.8777   1
  -1  -2   2 32.2152  3.8399   1
  -1  -2   2 13.8304  3.2351   1
  -1  -2   2 19.7745  3.3369   6
   0   2  -2 2362.76  127.43   1
   0   2  -2 2315.71   81.97   1
   0   2  -2 2377.65   94.38   7
   0   2  -2 2295.50  121.97   6
   0  -2   2 2269.24  100.98   7
   0  -2   2 2455.46  148.16   1
   0  -2   2 2266.11  100.92   1
  -1   2  -2 17.7625  3.2634   1
  -1   2  -2 19.4224  4.3150   1
   1  -2   2 24.9860  4.5698   1
   1  -2   2 18.4940  4.7612   1
  -2   2  -2 6649.83  232.55   1
  -2   2  -2 6332.58  324.35   1
   2  -2   2 6515.02  235.27   1
   2  -2   2 6390.54  224.32   1
  -3   2  -2 684.705  24.515   1
  -3   2  -2 698.898  38.122   1
   3  -2   2 693.936  32.471   1
   3  -2   2 667.583  30.344   1
  -4   2  -2 1540.80   73.68   1
  -4   2  -2 1501.71   51.21   1
   4  -2   2 1546.74   86.12   1
   4  -2   2 1528.49   68.86   3
   4  -2   2 1666.54   63.16   1
  -5   2  -2 1825.95   70.47   1
  -5   2  -2 1893.16   56.81   1
   5  -2   2 1848.72   62.15   1
   5  -2   2 1944.95   93.13   1
   5  -2   2 1811.95  107.67   3
  -6   2  -2 10.5141  3.9431   1
  -6   2  -2 9.98863 3.50537   1
  -6   2  -2 5.32128 2.24402   5
   6  -2   2 7.16552 3.84668   1
   6  -2   2 6.88724 3.41628   1
  -7   2  -2 -3.0746  3.5490   1
  -7   2  -2 -3.8487  4.9031   1
  -7   2  -2 -4.3545  3.5613   2
  -7   2  -2 2.37672 2.71001   5
   7  -2   2 2.27644 3.12955   1
   7  -2   2 5.95283 5.66079   1
  -8   2  -2 170.470  16.235   2
  -8   2  -2 166.007  13.373   5
  -8   2  -2 159.320  14.869   1
  -8   2  -2 163.300  13.957   1
   8  -2   2 182.339  18.378   1
   8  -2   2 164.146  14.630   1
  -9   2  -2 46.4422  9.6845   2
  -9   2  -2 43.7167  8.6660   1
  -9   2  -2 46.4318  7.8126   1
   9  -2   2 42.3703  7.4791   1
   9  -2   2 48.3757  6.6180   1
 -10   2  -2 399.633  34.675   2
 -10   2  -2 429.552  38.832   1
 -10   2  -2 489.787  67.971   6
 -10   2  -2 447.918  37.724   1
  10  -2   2 491.346  43.591   1
 -11   2  -2 172.066  19.077   1
  11  -2   2 199.937  20.065   1
  10   1  -2 9.14690 6.56136   2
 -10  -1   2 -0.4014  9.0351   1
   9   1  -2 1.12442 5.50820   1
   9   1  -2 -5.8757  3.8542   2
  -9  -1   2 0.54798 5.49117   1
   8   1  -2 27.2473  6.6546   2
   8   1  -2 17.6866  6.4372   1
   8   1  -2 14.4173  5.3274   5
  -8  -1   2 44.6868  8.8231   1
  -8  -1   2 27.2588  5.5687   1
   7   1  -2 296.687  29.250   1
   7   1  -2 293.527  17.661   2
   7   1  -2 322.429  19.548   1
  -7  -1   2 343.076  25.674   1
  -7  -1   2 299.808  34.429   6
  -7  -1   2 306.617  33.481   1
   6   1  -2 15.2163  5.0446   1
   6   1  -2 23.2363  5.9891   2
   6   1  -2 13.0618  4.9904   1
  -6  -1   2 28.8452  6.1401   1
  -6  -1   2 15.4742  5.2208   1
  -6  -1   2 19.6826  6.3841   6
   5   1  -2 2.36630 3.55464   1
   5   1  -2 -6.3423  4.0198   1
  -5  -1   2 5.23286 4.27587   1
  -5  -1   2 -0.9603  3.7515   6
  -5  -1   2 1.43321 3.13245   1
   4   1  -2 64.9734  7.1530   1
   4   1  -2 49.7827  5.3082   1
  -4  -1   2 59.6010  4.0081   4
  -4  -1   2 61.9185  6.1462   6
  -4  -1   2 43.6094  6.2565   1
  -4  -1   2 48.8956  4.7531   1
   3   1  -2 1215.08   54.92   1
   3   1  -2 1129.95   60.49   1
  -3  -1   2 1182.06   60.68   1
  -3  -1   2 1107.95   48.68   1
  -3  -1   2 1124.61   60.19   6
   2   1  -2 540.545  22.796   1
   2   1  -2 534.347  26.781   1
  -2  -1   2 494.656  22.424   1
  -2  -1   2 472.241  22.609   6
  -2  -1   2 494.738  19.184   1
   1   1  -2 3139.39  163.63   1
   1   1  -2 3279.39  123.31   6
   1   1  -2 3031.04  141.24   1
  -1  -1   2 3124.14  145.65   1
  -1  -1   2 3105.67  165.77   1
  -1  -1   2 3173.55  148.39   6
   0   1  -2 2.15892 2.01329   1
   0   1  -2 6.45086 2.35366   1
   0   1  -2 6.13962 1.62821   6
   0  -1   2 3.03531 1.95757   1
   0  -1   2 5.53784 2.16155   1
   0  -1   2 5.22710 1.59570   6
  -1   1  -2 7354.58  253.18   1
  -1   1  -2 7531.77  303.14   1
   1  -1   2 7227.51  598.28   1
   1  -1   2 7566.56  298.49   1
  -2   1  -2 277.953  11.966   1
  -2   1  -2 283.573  18.487   1
  -2   1  -2 280.666  15.973   3
   2  -1   2 278.301  15.209   1
   2  -1   2 272.575   9.348   1
  -3   1  -2 752.591  26.431   1
  -3   1  -2 761.984  39.964   1
   3  -1   2 797.712  39.097   1
   3  -1   2 806.504  39.033   1
   3  -1   2 777.596  40.823   3
  -4   1  -2 1479.45   41.22   1
  -4   1  -2 1470.44   54.59   1
   4  -1   2 1530.76   63.28   1
   4  -1   2 1452.87   62.43   1
   4  -1   2 1373.05   60.48   3
  -5   1  -2 143.994  13.003   1
  -5   1  -2 152.379   9.589   1
  -5   1  -2 150.389   8.641   5
  -5   1  -2 147.596   9.991   2
   5  -1   2 149.303  10.829   1
   5  -1   2 139.910   8.505   1
  -6   1  -2 2746.31  144.13   5
  -6   1  -2 2737.23  146.86   2
  -6   1  -2 2643.72  147.26   1
  -6   1  -2 2700.16  126.54   1
   6  -1   2 2907.89  157.10   1
   6  -1   2 2647.63  172.19   1
  -7   1  -2 105.869   9.105   1
  -7   1  -2 109.873  10.152   1
  -7   1  -2 84.6207 12.1377   2
  -7   1  -2 109.754   8.626   5
   7  -1   2 105.922  10.211   1
   7  -1   2 114.950  12.829   1
  -8   1  -2 5.14504 5.29584   1
  -8   1  -2 9.89414 5.25637   2
  -8   1  -2 -0.8372  3.8899   1
  -8   1  -2 3.81703 3.66617   6
   8  -1   2 -1.6002  4.9281   1
   8  -1   2 8.13665 4.49455   1
  -9   1  -2 24.5347  6.8529   6
  -9   1  -2 28.3862  6.7991   1
  -9   1  -2 17.0810  5.9685   1
  -9   1  -2 9.60262 6.27242   2
   9  -1   2 5.23206 4.32842   1
 -10   1  -2 63.4999 12.4955   1
 -10   1  -2 44.8248 10.6160   6
 -10   1  -2 66.2738 11.6412   1
  10  -1   2 51.5143 11.0696   1
 -11   1  -2 6.12055 6.03131   1
  11  -1   2 3.02670 6.48994   1
 -12   1  -2 27.4459  8.5778   1
 -10   0   2 174.038  21.801   1
   9   0  -2 39.1022  7.9336   1
  -9   0   2 46.5279  9.1081   1
  -9   0   2 66.0241 10.2018   1
   8   0  -2 99.0276 12.5050   5
   8   0  -2 131.454  11.584   2
   8   0  -2 110.293  13.487   1
  -8   0   2 108.002  12.444   1
  -8   0   2 100.761  15.220   1
   7   0  -2 188.646  16.155   5
   7   0  -2 204.800  17.483   2
   7   0  -2 152.218  14.959   1
   7   0  -2 194.742  21.888   1
  -7   0   2 165.458  19.844   6
  -7   0   2 172.294  19.682   1
  -7   0   2 168.357  17.647   1
   6   0  -2 4.13507 3.91496   1
   6   0  -2 0.93040 3.67764   1
   6   0  -2 8.26540 3.64011   2
  -6   0   2 0.94283 3.67900   1
  -6   0   2 2.16567 3.62509   1
  -6   0   2 4.58974 6.25510   6
   5   0  -2 135.947  10.422   1
   5   0  -2 118.037   8.162   2
   5   0  -2 93.5977 11.4748   1
  -5   0   2 124.305   8.092   1
  -5   0   2 100.801  10.209   1
  -5   0   2 108.183  11.434   6
   4   0  -2 2658.89  105.68   2
   4   0  -2 2670.63  131.50   1
   4   0  -2 2585.63   97.43   1
  -4   0   2 2484.18  102.27   1
  -4   0   2 2711.50   88.08   6
  -4   0   2 2797.45  123.23   1
   3   0  -2 2414.67   96.16   1
   3   0  -2 2295.56  112.76   1
  -3   0   2 2345.68  103.50   1
  -3   0   2 2434.03  106.93   1
   2   0  -2 4910.17  244.88   1
   2   0  -2 5087.73  133.25   1
  -2   0   2 4981.17  256.63   1
  -2   0   2 4973.81  163.61   1
   1   0  -2 2972.87  123.32   1
   1   0  -2 2991.82   85.21   1
  -1   0   2 2829.55  128.08   1
  -1   0   2 2961.78  134.88   1
   0   0  -2 554.010  30.788   1
   0   0  -2 548.722  25.521   1
   0   0   2 557.787  34.663   1
   0   0   2 556.456  23.167   6
   0   0   2 553.740  31.888   1
  -1   0  -2 2869.53  138.93   1
  -1   0  -2 2850.99  143.17   1
   1   0   2 2845.32  110.05   1
   1   0   2 2906.48  155.16   1
  -3   0  -2 885.136  26.313   1
  -3   0  -2 863.929  54.982   5
  -3   0  -2 856.912  47.259   2
  -3   0  -2 859.178  47.402   1
   3   0   2 888.175  36.168   1
   3   0   2 889.675  47.248   1
   3   0   2 861.349  49.719   3
  -4   0  -2 412.593  19.986   1
  -4   0  -2 416.771  26.036   5
  -4   0  -2 413.311  20.777   1
  -4   0  -2 415.441  21.485   2
   4   0   2 425.821  16.639   1
   4   0   2 446.953  19.409   1
  -5   0  -2 748.339  35.092   2
  -5   0  -2 689.240  32.423   5
  -5   0  -2 708.276  35.844   1
  -5   0  -2 714.522  39.291   1
  -5   0  -2 685.478  33.634   6
   5   0   2 708.820  31.894   1
   5   0   2 698.743  37.967   1
  -6   0  -2 674.729  46.286   6
  -6   0  -2 663.467  27.351   5
  -6   0  -2 653.994  29.957   1
  -6   0  -2 712.890  42.847   2
  -6   0  -2 679.368  40.596   1
   6   0   2 684.267  39.276   1
   6   0   2 714.557  33.284   1
  -7   0  -2 451.724  39.666   1
  -7   0  -2 428.207  24.754   2
  -7   0  -2 418.731  26.053   1
  -7   0  -2 455.281  29.208   6
   7   0   2 419.520  24.428   1
   7   0   2 428.726  39.024   1
  -8   0  -2 82.7355  9.2609   1
  -8   0  -2 70.8202  9.6919   1
  -8   0  -2 93.8209 12.1141   6
   8   0   2 83.9619  8.9365   1
   8   0   2 87.7563 10.0785   1
  -9   0  -2 388.393  27.158   1
  -9   0  -2 411.648  33.034   6
  -9   0  -2 415.190  39.017   1
   9   0   2 401.391  28.748   1
   9   0   2 367.993  34.674   1
 -10   0  -2 74.1195 11.7361   1
 -10   0  -2 78.4587 10.5470   1
 -10   0  -2 74.7280 12.3956   6
  10   0   2 71.0504  8.4150   1
  10   0   2 61.4103  8.9674   4
 -11   0  -2 103.280  14.805   1
 -12   0  -2 34.6085  9.0665   1
  10  -1  -2  7.9591 10.7289   1
 -10   1   2 11.8482  9.5304   1
   9  -1  -2 -6.2756  7.5407   1
  -9   1   2 -0.6686  7.2737   1
  -9   1   2 -2.0418 10.3128   1
   8  -1  -2 92.6931  8.2205   5
   8  -1  -2 88.3216 10.7927   1
  -8   1   2 92.1491  8.6008   1
  -8   1   2 59.8397 14.0914   6
  -8   1   2 84.7026 11.9951   1
   7  -1  -2 13.6167  5.9148   1
   7  -1  -2 12.6525  5.2904   1
  -7   1   2 17.1677  5.6109   1
  -7   1   2 10.1290  5.4150   6
  -7   1   2 9.16306 4.97679   1
   6  -1  -2 8.40309 4.09165   1
   6  -1  -2 1.67886 1.11686   5
   6  -1  -2 2.05545 3.91501   1
  -6   1   2 3.51974 3.59591   1
  -6   1   2 5.48198 4.00106   1
   5  -1  -2 478.645  30.033   1
   5  -1  -2 427.124  23.543   1
   5  -1  -2 419.217  24.354   2
  -5   1   2 421.360  24.397   1
  -5   1   2 454.987  30.340   1
   4  -1  -2 12.2458  5.6143   1
   4  -1  -2 20.2905  3.1584   2
   4  -1  -2 18.4449  4.0464   1
  -4   1   2 15.9233  3.7988   1
  -4   1   2 19.7384  3.6549   1
   3  -1  -2 6475.75  242.21   1
   3  -1  -2 6253.39  221.23   2
   3  -1  -2 6305.38  199.34   1
  -3   1   2 6004.73  335.60   4
  -3   1   2 6153.17  212.49   1
  -3   1   2 6080.81  212.19   1
   2  -1  -2 4282.70  165.55   1
   2  -1  -2 4256.46  188.49   2
   2  -1  -2 4135.98  204.04   1
  -2   1   2 4175.21  133.62   1
  -2   1   2 4142.76  179.52   1
  -2   1   2 3982.23  187.73   4
   1  -1  -2 7502.07  337.26   1
   1  -1  -2 7731.56  256.54   1
  -1   1   2 7391.25  319.24   1
  -1   1   2 7630.46  318.20   1
   0  -1  -2 861.065  42.574   1
   0  -1  -2 859.991  45.216   2
   0  -1  -2 858.093  36.064   1
   0   1   2 891.452  33.591   1
   0   1   2 872.912  40.739   1
  -1  -1  -2 1160.96   61.52   5
  -1  -1  -2 1172.17   50.28   2
  -1  -1  -2 1119.36   58.24   1
  -1  -1  -2 1105.15   65.52   1
  -1  -1  -2 1173.63   61.59   3
   1   1   2 1125.12   60.35   1
   1   1   2 1158.36   50.51   2
  -2  -1  -2 2788.78  116.62   1
  -2  -1  -2 2847.74  175.18   5
  -2  -1  -2 2851.04  124.49   2
  -2  -1  -2 2760.41  116.81   1
   2   1   2 2868.04   96.90   1
   2   1   2 2773.40  119.93   5
   2   1   2 2787.98  138.43   1
   2   1   2 2683.28  129.77   3
   2   1   2 2788.01  142.84   2
   2   1   2 2832.43  149.93   6
  -3  -1  -2 447.198  29.573   2
  -3  -1  -2 464.576  32.266   5
  -3  -1  -2 449.661  26.676   6
  -3  -1  -2 456.487  16.167   1
  -3  -1  -2 443.711  21.349   1
   3   1   2 426.985  21.555   2
   3   1   2 470.015  23.636   6
   3   1   2 429.582  18.028   1
   3   1   2 431.587  26.969   1
   3   1   2 429.921  23.953   5
  -4  -1  -2 204.876  14.076   6
  -4  -1  -2 215.863  14.234   1
  -4  -1  -2 210.843  11.148   1
  -4  -1  -2 196.665  10.014   5
  -4  -1  -2 231.432  12.503   2
   4   1   2 224.005  12.382   1
   4   1   2 232.506  14.954   2
   4   1   2 219.709  16.245   5
   4   1   2 198.893  10.441   1
  -5  -1  -2 846.173  35.878   6
  -5  -1  -2 770.292  37.486   2
  -5  -1  -2 798.730  45.869   1
  -5  -1  -2 867.264  35.080   1
   5   1   2 815.801  37.121   1
   5   1   2 805.965  36.162   5
   5   1   2 847.731  37.963   2
   5   1   2 879.036  45.098   1
  -6  -1  -2 1030.37   38.07   1
  -6  -1  -2 1014.55   73.15   6
  -6  -1  -2 990.748  65.212   1
   6   1   2 984.345  46.545   5
   6   1   2 1021.48   43.43   1
   6   1   2 961.112  63.280   1
   6   1   2 987.815  49.214   2
  -7  -1  -2 2428.62  175.94   6
  -7  -1  -2 2433.67  125.36   1
  -7  -1  -2 2380.94  152.54   1
   7   1   2 2350.89  158.03   1
   7   1   2 2406.71  126.27   2
   7   1   2 2448.02  132.53   1
   7   1   2 2411.16  138.20   5
  -8  -1  -2 209.593  20.413   1
  -8  -1  -2 199.069  14.680   1
  -8  -1  -2 229.096  21.891   6
   8   1   2 221.060  13.527   1
   8   1   2 224.460  22.458   4
   8   1   2 197.855  18.668   1
   8   1   2 199.893  14.031   5
  -9  -1  -2 258.548  22.043   6
  -9  -1  -2 240.574  21.103   1
   9   1   2 224.122  39.565   4
   9   1   2 221.420  22.987   1
   9   1   2 205.413  21.183   1
 -10  -1  -2 15.0419  7.8156   1
 -10  -1  -2 10.7638  4.4915   1
  10   1   2 18.8389  6.1180   1
 -11  -1  -2 5.77627 5.36265   1
  10  -2  -2 30.7188  9.1374   1
 -10   2   2 2.81203 7.90564   1
   9  -2  -2 434.721  40.783   1
  -9   2   2 411.195  39.334   1
  -9   2   2 432.059  37.213   1
   8  -2  -2 558.930  33.412   1
  -8   2   2 530.257  50.363   1
  -8   2   2 569.507  41.566   1
   7  -2  -2 59.9463  9.9506   1
   7  -2  -2 47.0448 10.5138   1
  -7   2   2 56.6401  9.4902   1
   6  -2  -2 459.893  28.163   1
   6  -2  -2 506.733  34.265   1
  -6   2   2 514.875  51.614   1
  -6   2   2 475.617  30.006   1
   5  -2  -2 58.0713  7.5566   1
   5  -2  -2 68.1023  7.2409   1
  -5   2   2 89.5843  7.5066   1
  -5   2   2 75.5900 10.3611   1
   4  -2  -2 49.2307  5.5431   1
   4  -2  -2 62.9326  7.6813   1
  -4   2   2 42.8515  5.5627   1
  -4   2   2 49.7991  5.6284   1
   3  -2  -2 18.2200  1.1918   5
   3  -2  -2 16.7654  3.0155   1
  -3   2   2 17.8972  2.0047   2
  -3   2   2 12.8173  3.7372   1
  -3   2   2 14.8946  2.2732   4
  -3   2   2 12.9200  3.4160   1
   2  -2  -2 2.81251 2.40964   1
   2  -2  -2 1.33069 2.34545   1
   2  -2  -2 1.75842 0.87636   5
  -2   2   2 1.12235 0.66943   2
  -2   2   2 1.37295 1.32716   4
  -2   2   2 4.76961 2.90966   1
   1  -2  -2 1846.57  103.95   1
   1  -2  -2 1800.75  108.60   5
   1  -2  -2 1705.29   73.91   1
  -1   2   2 1747.92   97.51   4
  -1   2   2 1788.04  103.74   1
  -1   2   2 1862.69   58.28   5
  -1   2   2 1792.88   70.51   1
   0  -2  -2 120.728   9.062   5
   0  -2  -2 124.366   7.966   1
   0  -2  -2 120.377   6.387   1
   0   2   2 118.361   8.187   4
   0   2   2 121.004   7.238   1
   0   2   2 122.369   7.099   5
   0   2   2 115.033   5.288   1
  -1  -2  -2 3088.79  139.80   1
  -1  -2  -2 3170.49  156.57   3
  -1  -2  -2 3113.56  199.44   7
  -1  -2  -2 2943.20  156.26   1
  -1  -2  -2 3085.99  144.50   5
   1   2   2 3147.78  163.66   3
   1   2   2 3038.35  164.84   4
   1   2   2 3210.70  151.42   5
   1   2   2 3286.40  146.25   1
   1   2   2 3152.73  151.74   7
   1   2   2 3088.50  129.15   1
  -2  -2  -2 220.594  10.943   5
   2   2   2 219.056  11.254   3
   2   2   2 244.129  13.522   2
   2   2   2 232.968  10.951   5
   2   2   2 239.758  12.130   7
  -3  -2  -2 162.102   7.187   1
  -3  -2  -2 167.532   7.519   1
   3   2   2 179.244  11.850   2
   3   2   2 138.858  11.391   5
   3   2   2 175.395   7.920   1
   3   2   2 154.798   8.621   1
   3   2   2 171.168   9.752   6
  -4  -2  -2 640.885  36.285   1
  -4  -2  -2 623.262  33.326   6
   4   2   2 702.954  43.929   2
   4   2   2 675.467  33.122   6
   4   2   2 636.804  34.854   1
   4   2   2 650.852  38.219   1
   4   2   2 634.096  30.080   5
  -5  -2  -2 24.9758  3.6950   1
  -5  -2  -2 24.2861  2.6203   1
  -5  -2  -2 24.6523  4.7808   6
   5   2   2 23.4541  2.9580   1
   5   2   2 23.9259  4.4430   6
   5   2   2 32.4547  4.1678   2
   5   2   2 28.3204  3.2326   1
   5   2   2 18.7040  4.1606   5
   5   2   2 30.7969  3.7190   4
  -6  -2  -2 299.383  18.899   1
  -6  -2  -2 330.132  20.541   1
  -6  -2  -2 301.917  23.632   6
   6   2   2 344.000  14.172   1
   6   2   2 385.082  22.731   2
   6   2   2 297.808  20.924   1
   6   2   2 331.410  28.481   5
   6   2   2 324.939  18.947   4
  -7  -2  -2 521.336  46.475   6
  -7  -2  -2 543.481  34.510   1
  -7  -2  -2 486.843  30.226   1
   7   2   2 509.256  26.124   4
   7   2   2 542.572  30.491   1
   7   2   2 509.604  32.829   5
   7   2   2 503.939  49.430   1
   7   2   2 520.847  28.563   2
  -8  -2  -2 296.510  34.101   6
  -8  -2  -2 320.578  21.145   1
  -8  -2  -2 326.294  21.766   1
   8   2   2 328.755  31.591   1
   8   2   2 334.479  29.103   4
   8   2   2 301.104  19.293   5
   8   2   2 331.427  31.259   2
   8   2   2 326.336  21.164   1
  -9  -2  -2 896.726  86.025   6
  -9  -2  -2 1065.85   90.18   1
  -9  -2  -2 982.298  99.280   1
   9   2   2 963.606  74.541   1
   9   2   2 1009.02   93.96   1
   9   2   2 922.197 103.350   5
   9   2   2 1005.45   65.66   2
   9   2   2 980.126 125.674   4
 -10  -2  -2 42.5797 10.0668   1
 -10  -2  -2 21.0870  5.6649   1
  10   2   2 15.5098  5.9349   1
  10   2   2 16.1047  7.0499   5
  10   2   2 25.5457  5.5235   1
 -11  -2  -2 232.427  35.600   1
  10  -3  -2 174.529  19.998   1
 -10   3   2 178.359  18.992   1
   9  -3  -2 0.33541 6.05547   1
  -9   3   2 0.40441 6.25668   1
   8  -3  -2 174.573  16.106   1
  -8   3   2 135.576  14.870   1
  -8   3   2 140.628  17.748   1
   7  -3  -2 1275.03  129.72   1
   7  -3  -2 1296.48   80.27   1
  -7   3   2 1276.32   74.46   1
  -7   3   2 1279.50   79.53   1
   6  -3  -2 19.1597  6.4797   1
   6  -3  -2 22.4133  6.9574   1
  -6   3   2 38.3003  7.4920   1
  -6   3   2 37.9823  6.1072   1
   5  -3  -2 0.03763 1.61037   4
   5  -3  -2 2.29544 4.12347   1
   5  -3  -2 -0.2628  5.2885   1
  -5   3   2 0.46803 1.73352   2
  -5   3   2 -0.0368  3.9792   1
  -5   3   2 2.57085 3.78405   1
   4  -3  -2 1078.33   72.88   1
   4  -3  -2 1071.10   66.11   4
   4  -3  -2 1081.05   53.78   1
  -4   3   2 1060.32   44.89   2
  -4   3   2 1008.35   56.98   1
  -4   3   2 1063.78   51.51   1
   3  -3  -2 6.51371 3.16733   1
   3  -3  -2 1.08389 2.71138   1
   3  -3  -2 11.4661  2.3811   4
  -3   3   2 13.2122  4.3186   1
  -3   3   2 5.24297 3.07488   1
   2  -3  -2 4810.81  184.21   4
   2  -3  -2 4777.12  206.27   1
   2  -3  -2 4873.50  174.42   1
  -2   3   2 4795.89  209.43   1
  -2   3   2 5107.57  243.73   5
  -2   3   2 4773.06  184.72   1
  -2   3   2 4947.92  216.89   4
   1  -3  -2 625.962  35.464   1
   1  -3  -2 615.913  22.043   1
   1  -3  -2 630.178  26.190   4
  -1   3   2 654.946  26.577   1
  -1   3   2 581.312  31.717   1
  -1   3   2 655.398  29.609   4
  -1   3   2 641.250  18.601   5
   0  -3  -2 723.907  27.220   1
   0  -3  -2 740.591  33.196   1
   0  -3  -2 713.378  43.297   3
   0  -3  -2 716.740  29.212   4
   0   3   2 733.009  27.479   1
   0   3   2 702.872  27.623   5
   0   3   2 743.864  42.284   1
   0   3   2 730.178  39.654   4
  -1  -3  -2 2254.87  140.00   1
  -1  -3  -2 2313.45  135.49   7
  -1  -3  -2 2363.29  109.02   4
  -1  -3  -2 2277.19   75.01   1
   1   3   2 2311.03  110.97   7
   1   3   2 2304.26  120.41   4
   1   3   2 2308.01   90.45   1
   1   3   2 2380.40  101.83   5
   1   3   2 2286.07  100.00   1
   1   3   2 2277.68   84.58   3
  -2  -3  -2 2105.40   98.58   1
   2   3   2 2296.07  121.50   4
   2   3   2 2454.04  116.73   1
   2   3   2 2211.89   66.95   1
   2   3   2 2330.31  121.72   7
   2   3   2 2322.72   98.21   5
  -3  -3  -2 1802.47   63.99   1
  -3  -3  -2 2233.32   78.04   1
   3   3   2 2091.37  112.31   7
   3   3   2 2018.30   92.42   4
   3   3   2 2011.77  112.01   6
   3   3   2 2197.89  117.91   1
   3   3   2 1885.31   70.84   1
   3   3   2 2058.48   58.93   5
  -4  -3  -2 115.141   6.065   1
  -4  -3  -2 124.201   6.218   1
   4   3   2 130.217  12.681   4
   4   3   2 126.414   9.882   6
   4   3   2 131.714  11.112   5
   4   3   2 127.373   6.835   1
   4   3   2 111.181   6.853   1
  -5  -3  -2 4.75176 2.93562   6
  -5  -3  -2 1.84211 1.37743   1
   5   3   2 3.67322 4.35746   2
   5   3   2 2.07260 1.94340   4
   5   3   2 7.99563 2.97864   5
   5   3   2 3.44711 1.63904   1
   5   3   2 1.02291 1.41905   1
   5   3   2 1.96880 3.48027   6
  -6  -3  -2 136.847  11.066   1
  -6  -3  -2 125.257  13.766   6
  -6  -3  -2 127.238  11.758   1
   6   3   2 134.170  11.896   4
   6   3   2 126.879  13.814   5
   6   3   2 124.651   9.315   1
   6   3   2 134.284  12.352   1
   6   3   2 147.306  10.977   2
   6   3   2 135.428  11.711   6
  -7  -3  -2 -1.1167  2.6726   1
  -7  -3  -2 -1.4820  2.6965   1
  -7  -3  -2 1.28405 3.53515   6
   7   3   2 -5.5219  5.0430   5
   7   3   2 1.15323 1.97599   4
   7   3   2 4.01972 2.35819   1
   7   3   2 1.85577 1.89616   1
   7   3   2 2.25824 4.58949   2
  -8  -3  -2 -1.1892  3.1887   1
  -8  -3  -2 1.28473 5.23520   6
  -8  -3  -2 1.15161 3.02182   1
   8   3   2 4.75820 5.21278   5
   8   3   2 -1.5673  3.7591   2
   8   3   2 -1.2872  2.5599   1
   8   3   2 3.30767 3.97179   1
   8   3   2 -2.8752  1.9353   4
  -9  -3  -2 655.587  55.230   1
  -9  -3  -2 544.600  44.995   6
  -9  -3  -2 638.132  51.489   1
   9   3   2 562.596  47.690   5
   9   3   2 574.674  30.502   1
   9   3   2 612.250  44.190   1
   9   3   2 642.671  68.396   2
 -10  -3  -2 109.395  18.645   1
  10   3   2 70.8947 14.5817   5
  10   3   2 70.5179 11.9268   1
  10   3   2 123.941  18.762   2
 -11  -3  -2 -9.7520  5.5779   1
  11   3   2 1.79877 8.22752   2
  10  -4  -2 5.69014 7.20334   1
 -10   4   2 -6.9008  8.9253   1
   9  -4  -2 6.82767 7.18951   1
  -9   4   2 16.4579  7.6583   1
  -9   4   2  9.8029 10.4978   1
   8  -4  -2 9.82085 5.47252   1
  -8   4   2 12.3371  7.9028   1
  -8   4   2 19.6535  7.7330   1
   7  -4  -2 114.886  14.778   1
   7  -4  -2 95.2643  7.8510   4
   7  -4  -2 86.8136 12.4446   1
  -7   4   2 114.528  15.169   1
  -7   4   2 106.082  11.061   1
  -7   4   2 110.549   9.757   2
   6  -4  -2 37.4399  4.6567   4
   6  -4  -2 58.1747  8.3799   1
   6  -4  -2 25.4605  6.7040   1
  -6   4   2 39.5521  8.6281   1
  -6   4   2 44.1241  9.3278   1
  -6   4   2 32.2695  4.8372   2
   5  -4  -2 64.8708  8.6721   1
   5  -4  -2 72.7611  8.3610   1
   5  -4  -2 93.0447  7.5265   4
  -5   4   2 83.0813  7.9804   1
  -5   4   2 69.6981  5.9968   2
  -5   4   2 68.9856  9.4314   1
   4  -4  -2 51.6824  7.2317   1
   4  -4  -2 50.1799  7.1762   1
   4  -4  -2 59.3479  6.8307   4
  -4   4   2 65.9527  8.5602   1
  -4   4   2 53.6442  6.7454   1
   3  -4  -2 410.755  26.792   1
   3  -4  -2 346.599  15.551   1
   3  -4  -2 400.019  26.574   4
  -3   4   2 397.509  19.395   1
  -3   4   2 360.738  26.504   5
  -3   4   2 293.260  14.097   1
   2  -4  -2 768.473  35.434   4
   2  -4  -2 772.430  23.653   1
   2  -4  -2 795.826  38.061   1
  -2   4   2 742.560  40.316   4
  -2   4   2 787.146  22.354   5
  -2   4   2 774.019  37.404   1
  -2   4   2 665.027  45.162   1
   1  -4  -2 1621.12   49.36   1
   1  -4  -2 1553.76   83.98   1
   1  -4  -2 1651.14   56.61   4
   1  -4  -2 1697.75  102.83   3
  -1   4   2 1624.50   82.42   4
  -1   4   2 1584.17   49.42   1
  -1   4   2 1651.80   62.36   1
   0  -4  -2 498.500  24.175   4
   0  -4  -2 483.724  21.278   1
   0  -4  -2 521.070  20.835   1
   0   4   2 463.702  19.124   1
   0   4   2 477.625  18.868   3
   0   4   2 520.653  21.255   4
   0   4   2 510.230  19.964   1
  -1  -4  -2 2.35905 2.09717   1
  -1  -4  -2 4.04139 1.60591   1
  -1  -4  -2 6.16109 3.87240   4
  -1  -4  -2 2.85605 2.52035   7
   1   4   2 6.75173 1.98688   1
   1   4   2 5.58801 2.77635   3
   1   4   2 3.11079 2.92131   4
   1   4   2 4.71698 2.21730   1
  -2  -4  -2 991.662  51.433   1
  -2  -4  -2 991.766  45.522   4
  -2  -4  -2 953.317  49.636   7
   2   4   2 996.742  42.339   4
   2   4   2 978.503  42.060   7
   2   4   2 991.747  67.160   1
   2   4   2 983.097  30.846   1
  -3  -4  -2 3045.18  107.21   4
  -3  -4  -2 2919.46  184.50   1
   3   4   2 3201.04  175.83   1
   3   4   2 3053.43  217.61   6
   3   4   2 3138.99  111.36   4
   3   4   2 3164.39  110.70   1
   3   4   2 3163.67  112.52   7
  -4  -4  -2 128.715   8.973   1
  -4  -4  -2 125.229  10.528   1
   4   4   2 144.281   9.120   4
   4   4   2 125.580  11.533   5
   4   4   2 145.305  14.295   7
   4   4   2 129.317   8.014   1
   4   4   2 125.000   7.051   1
   4   4   2 125.452  10.769   6
  -5  -4  -2 73.1081  5.6705   1
   5   4   2 87.6108  6.8214   6
   5   4   2 73.9091  7.7636   5
   5   4   2 73.3990  8.6244   7
   5   4   2 80.4946  5.4825   1
   5   4   2 73.1919  4.9490   1
   5   4   2 71.1560  6.6929   4
  -6  -4  -2 1812.98   79.75   1
   6   4   2 1871.54  129.81   4
   6   4   2 1904.26   96.05   6
   6   4   2 2039.56  102.79   1
   6   4   2 1936.16  104.80   1
   6   4   2 1919.60  136.80   5
   6   4   2 2046.47  138.07   2
  -7  -4  -2 287.503  25.518   1
  -7  -4  -2 314.896  27.842   1
   7   4   2 345.428  22.765   1
   7   4   2 343.558  26.808   4
   7   4   2 365.740  21.684   5
   7   4   2 359.935  27.081   1
   7   4   2 316.192  35.659   2
  -8  -4  -2 36.7073  6.0668   1
  -8  -4  -2 47.3191  5.2076   1
   8   4   2 37.3494  4.7074   1
   8   4   2 38.2522  6.2319   1
   8   4   2 20.9019  8.0958   5
   8   4   2 34.4525  9.1640   2
  -9  -4  -2 39.6504  5.6451   1
  -9  -4  -2 37.0915  6.5006   1
   9   4   2 24.5077  6.5524   1
   9   4   2 29.6439  8.4668   5
   9   4   2 15.2769 11.0786   2
 -10  -4  -2 425.493  64.320   1
  10   4   2 441.786  56.049   2
  10  -5  -2 48.8732 12.3193   1
 -10   5   2 52.4592 13.5292   1
   9  -5  -2 19.1776  7.8646   1
  -9   5   2 4.55132 8.22674   1
   8  -5  -2 119.565   9.196   4
   8  -5  -2 142.099  17.911   1
  -8   5   2 158.367  18.809   1
  -8   5   2 104.225  15.887   1
  -8   5   2 127.013  12.308   2
   7  -5  -2 92.5917 11.5021   1
   7  -5  -2 69.5546 12.4628   1
   7  -5  -2 69.8912 10.0460   4
  -7   5   2 73.0032 10.8858   1
  -7   5   2 96.6493 11.0840   2
  -7   5   2 82.3811 12.2668   1
   6  -5  -2 197.284  21.445   1
   6  -5  -2 205.559  19.575   1
   6  -5  -2 186.872  21.811   4
  -6   5   2 186.362  15.073   1
  -6   5   2 189.866  19.508   1
  -6   5   2 193.652  12.153   2
   5  -5  -2 172.578  15.954   1
   5  -5  -2 176.230  18.110   4
   5  -5  -2 168.421  13.974   1
  -5   5   2 181.927  16.786   1
  -5   5   2 167.511  13.665   1
   4  -5  -2 954.138  56.437   4
   4  -5  -2 931.298  38.897   1
   4  -5  -2 976.014  52.753   1
  -4   5   2 1037.59   52.02   5
  -4   5   2 930.220  59.978   1
  -4   5   2 875.287  38.879   1
   3  -5  -2 3047.53  150.53   1
   3  -5  -2 3357.73  143.65   4
   3  -5  -2 3296.12  228.42   1
  -3   5   2 3282.05  156.19   1
  -3   5   2 3104.57   87.60   1
   2  -5  -2 0.22282 3.38541   1
   2  -5  -2 1.37433 4.07355   1
   2  -5  -2 1.45855 3.71508   4
   2  -5  -2 2.55137 1.71738   3
  -2   5   2 2.70601 3.40619   1
  -2   5   2 -1.6121  3.9301   1
   1  -5  -2 214.328  14.958   4
   1  -5  -2 212.907   9.729   1
   1  -5  -2 211.357   8.541   1
  -1   5   2 191.744   9.489   1
  -1   5   2 188.716  15.221   1
  -1   5   2 194.069  10.333   4
   0  -5  -2 63.2427  6.3874   7
   0  -5  -2 79.6282  6.9532   1
   0  -5  -2 81.1643  6.4937   4
   0  -5  -2 78.7078  5.0746   1
   0   5   2 85.7610  8.8314   4
   0   5   2 76.0599  6.2226   1
   0   5   2 88.2548  7.2736   1
   0   5   2 73.2824  5.1356   3
  -1  -5  -2 3.41618 1.79251   1
  -1  -5  -2 1.66437 1.80821   1
  -1  -5  -2 2.61265 2.60535   7
  -1  -5  -2 1.31037 2.60741   4
   1   5   2 1.65367 1.67024   1
   1   5   2 3.55836 1.68640   1
   1   5   2 3.77097 3.68933   4
   1   5   2 0.15768 2.12932   3
  -2  -5  -2 162.013   7.450   1
  -2  -5  -2 169.621  10.946   1
  -2  -5  -2 167.530  11.848   4
  -2  -5  -2 185.800  13.553   7
   2   5   2 187.809  11.066   4
   2   5   2 179.503  11.103   7
   2   5   2 190.888   8.285   1
   2   5   2 178.025   9.834   1
  -3  -5  -2 2508.11  131.72   4
  -3  -5  -2 2385.61  144.88   1
   3   5   2 2557.00   66.91   1
   3   5   2 2457.54  157.81   7
   3   5   2 2497.59  140.28   4
   3   5   2 2434.93  130.90   6
   3   5   2 2470.21  107.82   1
  -4  -5  -2 230.357  21.635   1
  -4  -5  -2 205.725  12.881   4
   4   5   2 204.080  13.991   7
   4   5   2 218.262  16.994   4
   4   5   2 224.729   9.930   1
   4   5   2 227.840  10.176   1
   4   5   2 215.752  14.572   6
  -5  -5  -2 294.386  14.045   1
   5   5   2 288.467  21.027   5
   5   5   2 288.032  20.322   1
   5   5   2 278.495  23.160   7
   5   5   2 317.679  22.784   6
   5   5   2 293.768  14.781   4
   5   5   2 264.033  19.590   1
  -6  -5  -2 345.122  19.736   1
   6   5   2 315.604  21.591   4
   6   5   2 365.355  27.805   5
   6   5   2 377.595  29.203   1
   6   5   2 361.877  23.154   6
   6   5   2 345.157  31.875   1
   6   5   2 350.832  37.300   7
  -7  -5  -2 93.9464  8.2193   1
   7   5   2 74.8842 11.7868   2
   7   5   2 66.9810  9.4911   6
   7   5   2 102.594   9.528   1
   7   5   2 94.6456  8.5142   1
   7   5   2 77.7020 11.3713   5
   7   5   2 80.3782 13.7004   7
  -8  -5  -2 661.530  58.159   1
   8   5   2 714.320  68.638   1
   8   5   2 648.379  48.784   1
   8   5   2 721.689  86.181   2
   8   5   2 642.552  77.451   5
  -9  -5  -2 129.077  16.012   1
   9   5   2 89.1152 12.3838   1
   9   5   2 118.008  18.357   2
 -10  -5  -2 27.6790  5.8890   1
  10   5   2 33.9407 11.2866   2
  10  -6  -2 62.7395 12.2327   1
 -10   6   2 57.0673 17.3213   1
   9  -6  -2 2.64181 8.42500   1
  -9   6   2 0.85229 8.87175   1
   8  -6  -2 24.8107  7.2053   4
   8  -6  -2 40.1431  9.8581   1
  -8   6   2 15.5585  6.7954   1
  -8   6   2 24.7750  6.1798   2
   7  -6  -2 19.8029  4.7661   4
   7  -6  -2 35.7594 11.1557   1
   7  -6  -2 33.6324 28.5417   1
  -7   6   2 16.0248  7.8688   1
  -7   6   2 15.9901  7.8752   1
  -7   6   2 22.8033  5.6118   2
   6  -6  -2 145.598  17.954   1
   6  -6  -2 163.505  13.811   1
   6  -6  -2 168.220  14.877   4
  -6   6   2 193.812  21.786   1
  -6   6   2 169.717  13.906   1
   5  -6  -2 15.7721  5.2827   1
   5  -6  -2 5.23870 4.31074   1
   5  -6  -2 8.68250 4.86370   4
  -5   6   2 9.24160 2.25186   5
  -5   6   2 2.43887 4.07511   1
  -5   6   2 0.53024 4.70970   1
   4  -6  -2 175.544  13.660   1
   4  -6  -2 189.624  15.801   4
   4  -6  -2 155.410  17.678   1
   4  -6  -2 194.720  16.195   3
  -4   6   2 172.178  15.762   1
  -4   6   2 161.295   9.846   1
  -4   6   2 162.087  13.567   5
   3  -6  -2 278.147  24.095   4
   3  -6  -2 279.646  18.483   1
   3  -6  -2 331.373  23.550   3
   3  -6  -2 246.793  17.034   1
  -3   6   2 266.491  22.364   1
  -3   6   2 265.356  25.701   1
   2  -6  -2 8.75914 3.54922   1
   2  -6  -2 7.87846 3.64196   4
   2  -6  -2 10.0815  3.5213   1
  -2   6   2 10.7240  4.1885   1
  -2   6   2 14.6211  4.4973   1
   1  -6  -2 19.4274  3.2742   1
   1  -6  -2 19.6058  4.2295   4
   1  -6  -2 24.2959  4.4144   1
  -1   6   2 15.9798  3.4331   1
  -1   6   2 11.5450  3.7435   1
   0  -6  -2 1006.67   45.02   1
   0  -6  -2 921.730  52.031   4
   0  -6  -2 921.464  42.157   7
   0  -6  -2 942.471  59.431   1
   0   6   2 909.938  45.914   1
   0   6   2 928.827  56.697   3
   0   6   2 905.552  28.200   1
  -1  -6  -2 397.671  20.020   1
  -1  -6  -2 380.309  22.584   7
  -1  -6  -2 425.464  27.124   1
  -1  -6  -2 424.891  23.734   4
   1   6   2 399.539  18.329   3
   1   6   2 409.271  14.094   1
   1   6   2 419.372  19.328   4
   1   6   2 373.146  25.613   1
  -2  -6  -2 588.729  28.291   1
  -2  -6  -2 568.857  31.048   1
  -2  -6  -2 532.389  38.503   4
  -2  -6  -2 581.286  28.061   7
   2   6   2 601.180  33.661   4
   2   6   2 648.024  28.544   1
   2   6   2 565.248  30.903   1
  -3  -6  -2 1.79095 2.58740   1
  -3  -6  -2 0.21491 1.16478   1
  -3  -6  -2 10.7108  4.1687   4
   3   6   2 4.60461 2.98324   4
   3   6   2 7.37361 4.39660   7
   3   6   2 -0.4820  1.5538   1
   3   6   2 -1.0588  1.4837   1
   3   6   2 0.03884 3.42494   6
  -4  -6  -2 9.04226 2.29310   1
  -4  -6  -2 17.9902  2.5207   1
  -4  -6  -2 15.2911  9.3980   4
   4   6   2 6.75676 4.89186   4
   4   6   2 21.3830  7.2036   6
   4   6   2 12.2041  3.2714   1
   4   6   2 15.4801  2.3212   1
   4   6   2 12.1807  6.1013   7
  -5  -6  -2 533.238  35.858   1
   5   6   2 449.015  48.250   7
   5   6   2 516.189  22.850   1
   5   6   2 547.703  40.450   6
  -6  -6  -2 29.3637  3.4461   1
  -6  -6  -2 31.2662  3.6960   1
   6   6   2 33.2037  9.2835   6
   6   6   2 40.8625  9.6885   7
   6   6   2 33.5003  4.3088   1
   6   6   2 18.1587  7.1867   5
   6   6   2 32.2119  4.4349   1
  -7  -6  -2 509.652  66.516   1
  -7  -6  -2 531.234  49.086   1
   7   6   2 513.592  45.074   1
   7   6   2 511.021  37.481   6
   7   6   2 545.942  48.210   1
   7   6   2 504.735  49.025   5
  -8  -6  -2 4.82614 3.39729   1
  -8  -6  -2 0.93840 1.77749   1
   8   6   2 17.0066  8.1289   2
   8   6   2 -2.7440  2.5919   1
  -9  -6  -2 15.0874  4.3104   1
   9   6   2 22.7805  7.6713   2
   9  -7  -2 104.291  21.199   1
  -9   7   2 147.114  20.121   1
   8  -7  -2 40.4128 10.4311   1
   8  -7  -2 30.7970  7.4201   4
  -8   7   2 44.7961 10.8531   1
   7  -7  -2 14.7310  5.8809   4
   7  -7  -2 27.1220  7.7850   1
  -7   7   2 33.2640  7.9379   1
   6  -7  -2 290.733  25.965   1
   6  -7  -2 283.979  34.690   3
   6  -7  -2 276.330  23.812   1
   6  -7  -2 246.258  27.990   4
  -6   7   2 286.078  21.659   5
  -6   7   2 274.803  21.408   1
  -6   7   2 295.269  21.806   1
   5  -7  -2 82.7990 11.1799   1
   5  -7  -2 61.4436 12.6360   1
   5  -7  -2 76.0165 11.6023   4
   5  -7  -2 68.8805 10.2087   3
  -5   7   2 72.1795 11.1045   1
  -5   7   2 87.3204  8.3859   5
  -5   7   2 88.8147 10.3890   1
   4  -7  -2 16.3291  5.1168   1
   4  -7  -2 20.7916  5.6393   4
   4  -7  -2 18.5692  5.9441   1
  -4   7   2 12.7225  5.9922   1
  -4   7   2 9.38464 5.20204   1
   3  -7  -2 379.954  36.753   4
   3  -7  -2 405.164  22.926   1
   3  -7  -2 413.667  27.841   1
  -3   7   2 412.894  26.919   1
  -3   7   2 395.921  44.635   1
   2  -7  -2 316.242  24.975   4
   2  -7  -2 344.894  29.543   1
   2  -7  -2 272.313  15.739   1
  -2   7   2 305.433  17.777   1
  -2   7   2 284.654  19.456   1
   1  -7  -2 363.854  22.203   1
   1  -7  -2 405.527  26.778   7
   1  -7  -2 333.522  23.176   1
   1  -7  -2 340.594  26.291   4
  -1   7   2 359.261  27.054   1
  -1   7   2 332.056  16.129   1
   0  -7  -2 267.105  17.222   1
   0  -7  -2 258.789  15.058   1
   0  -7  -2 293.400  23.361   4
   0  -7  -2 270.143  14.548   7
   0   7   2 246.152  17.062   1
   0   7   2 278.742  17.115   3
   0   7   2 241.079  15.065   1
  -1  -7  -2 60.0849  7.9008   7
  -1  -7  -2 55.1438  6.3009   1
  -1  -7  -2 55.3247  6.7595   1
  -1  -7  -2 57.2742  8.1927   4
   1   7   2 63.2867  6.7786   3
   1   7   2 49.1696  5.4348   1
   1   7   2 50.7520  6.2219   1
  -2  -7  -2 48.5752  6.3052   1
  -2  -7  -2 40.6188  4.0911   1
  -2  -7  -2 40.0695  7.7240   7
  -2  -7  -2 43.7402  8.0039   4
   2   7   2 60.3100  6.7499   3
   2   7   2 41.7549  5.6743   1
   2   7   2 58.7415  5.3694   1
  -3  -7  -2 4.40416 2.26492   1
  -3  -7  -2 4.19029 3.20084   1
  -3  -7  -2 -0.8770  5.6620   4
   3   7   2 4.69687 3.51651   1
   3   7   2 10.1654  6.1065   6
   3   7   2 5.04515 2.07148   1
   3   7   2 4.63613 3.75456   7
  -4  -7  -2 162.964  17.137   4
  -4  -7  -2 178.499  14.462   1
  -4  -7  -2 157.908  12.643   1
   4   7   2 162.093  12.699   1
   4   7   2 222.332  26.840   7
   4   7   2 136.888  11.591   6
   4   7   2 190.580  14.384   1
  -5  -7  -2 167.074  15.935   1
   5   7   2 139.232  17.138   7
   5   7   2 140.565  14.347   6
   5   7   2 198.535  15.623   1
   5   7   2 157.510  11.453   1
  -6  -7  -2 450.299  47.613   1
  -6  -7  -2 426.151  43.826   1
   6   7   2 463.057  57.026   1
   6   7   2 415.659  38.839   6
   6   7   2 400.631  42.008   1
  -7  -7  -2 171.363  17.042   1
  -7  -7  -2 203.579  24.989   1
   7   7   2 173.302  17.362   1
   7   7   2 187.165  23.020   6
  -8  -7  -2 20.6978  3.3634   1
   8   7   2 19.6281  9.0065   2
   8   7   2 20.9332  9.8309   6
   9   7   2 23.8152 11.3418   2
   9  -8  -2 29.6685 13.6369   1
  -9   8   2  1.9900 14.6144   1
   8  -8  -2 103.433  15.648   1
  -8   8   2 87.3299 16.2403   1
   7  -8  -2 35.6184 11.1195   1
   7  -8  -2 32.9855  8.2119   4
  -7   8   2 47.8304 14.5570   1
   6  -8  -2 26.6934  7.1046   4
   6  -8  -2 29.5912  8.1701   1
  -6   8   2 41.6845  5.1757   5
  -6   8   2 36.4061  9.1769   1
   5  -8  -2 80.3515 13.8231   1
   5  -8  -2 51.6806 11.9662   1
   5  -8  -2 48.2731  8.2418   4
  -5   8   2 82.9931 12.2311   5
  -5   8   2 64.6067 13.6813   1
   4  -8  -2 627.807  70.290   1
   4  -8  -2 643.277  64.563   4
   4  -8  -2 619.350  51.392   1
  -4   8   2 602.772  54.064   1
  -4   8   2 580.600  52.806   1
   3  -8  -2 134.196  14.714   1
   3  -8  -2 118.464  11.678   1
   3  -8  -2 117.652  14.042   4
  -3   8   2 102.731  15.338   1
  -3   8   2 126.810  11.290   1
   2  -8  -2 2286.17  144.56   1
   2  -8  -2 2215.17  175.05   4
   2  -8  -2 2402.23  152.25   1
  -2   8   2 2338.84  204.89   1
  -2   8   2 2450.05  122.63   1
   1  -8  -2 1122.84   60.29   1
   1  -8  -2 985.438  96.743   4
   1  -8  -2 1057.77   79.69   7
   1  -8  -2 1159.75   71.30   1
  -1   8   2 1141.07   60.35   1
  -1   8   2 1061.92   88.17   1
   0  -8  -2 3334.34  235.89   7
   0  -8  -2 3302.11  211.78   4
   0  -8  -2 3296.71  247.65   1
   0  -8  -2 3309.94  200.79   1
   0   8   2 3469.66  161.16   1
   0   8   2 3290.80  179.93   1
   0   8   2 3334.62  196.23   3
  -1  -8  -2 959.479  66.201   1
  -1  -8  -2 934.865  61.673   4
  -1  -8  -2 930.424  78.665   1
  -1  -8  -2 951.807  67.399   7
   1   8   2 952.049  64.853   1
   1   8   2 985.654  56.057   1
   1   8   2 886.530  68.179   3
  -2  -8  -2 18.7015  3.7513   1
  -2  -8  -2 15.0362  6.6512   4
  -2  -8  -2 8.66291 4.44124   7
  -2  -8  -2 23.7559  4.1083   1
   2   8   2 24.0110  5.4468   1
   2   8   2 15.9065  4.9510   1
   2   8   2 16.0611  4.6920   3
  -3  -8  -2 212.477  24.427   4
  -3  -8  -2 311.418  22.163   1
  -3  -8  -2 287.338  27.574   1
   3   8   2 295.439  26.408   6
   3   8   2 281.719  24.947   1
   3   8   2 286.021  15.591   1
  -4  -8  -2 182.236  13.037   1
  -4  -8  -2 176.871  16.712   4
  -4  -8  -2 171.933  11.832   1
   4   8   2 151.241  17.122   7
   4   8   2 208.160  16.921   1
   4   8   2 184.007  16.286   6
   4   8   2 173.365  13.410   1
  -5  -8  -2 79.9238 13.6402   4
  -5  -8  -2 89.3514 16.7009   1
  -5  -8  -2 90.9546 11.1885   1
   5   8   2 88.3797 13.5691   6
   5   8   2 86.3339  9.2611   1
   5   8   2 89.2737 12.4601   1
  -6  -8  -2 63.0089  8.6755   1
  -6  -8  -2 77.3924 10.3666   1
   6   8   2 65.0522  6.8001   1
  -7  -8  -2 386.117  36.507   1
   7   8   2 340.305  38.648   6
   8   8   2 39.8430 13.6272   2
   8   8   2 70.7212 15.0951   6
   8  -9  -2 22.8167 11.1026   1
  -8   9   2 29.2069 11.6446   1
   7  -9  -2 96.9666 18.4261   1
  -7   9   2 145.627  20.633   1
   6  -9  -2 260.310  31.571   1
  -6   9   2 295.607  30.846   1
   5  -9  -2 40.4545 14.2324   1
   5  -9  -2 51.3373  8.8256   1
  -5   9   2 47.7937  9.4049   5
  -5   9   2 32.7257 12.5445   1
   4  -9  -2 84.4822 13.2735   1
   4  -9  -2 84.1345 13.5843   1
  -4   9   2 111.465  15.521   1
   3  -9  -2 -3.2538  5.7225   1
   3  -9  -2 -4.7679  5.6495   1
   3  -9  -2 -13.905   7.247   4
  -3   9   2 -0.5025  5.5410   1
   2  -9  -2 394.354  36.864   4
   2  -9  -2 444.023  46.632   7
   2  -9  -2 406.515  34.997   1
   2  -9  -2 478.102  37.800   1
  -2   9   2 425.041  26.315   1
  -2   9   2 447.809  35.835   1
   1  -9  -2 5.04852 4.96500   7
   1  -9  -2 3.77483 6.37359   4
   1  -9  -2 2.69042 5.45886   1
   1  -9  -2 11.0902  5.5837   1
  -1   9   2 7.82383 4.93265   1
  -1   9   2 -3.4606  5.2014   1
   0  -9  -2 4.35789 4.12615   1
   0  -9  -2 11.2959  9.6665   4
   0  -9  -2 6.21526 6.16917   7
   0  -9  -2 6.44838 4.46174   1
   0   9   2 5.70823 4.22509   1
   0   9   2 3.04782 5.06092   1
   0   9   2 6.12711 4.14858   3
  -1  -9  -2 464.769  32.429   1
  -1  -9  -2 399.640  46.475   7
  -1  -9  -2 411.488  59.436   4
  -1  -9  -2 420.238  26.967   1
   1   9   2 457.342  39.307   1
   1   9   2 447.814  28.581   3
   1   9   2 428.191  45.082   1
  -2  -9  -2 -1.7785  5.4547   4
  -2  -9  -2 9.32821 4.95492   1
  -2  -9  -2 7.33304 7.73923   7
   2   9   2 11.0240  4.7486   1
   2   9   2 7.48543 3.97691   1
   2   9   2 14.5612  4.7087   3
  -3  -9  -2 52.5946  7.0226   1
  -3  -9  -2 52.4314  9.3258   1
  -3  -9  -2 31.2529  8.8368   4
   3   9   2 72.1144  9.9549   3
   3   9   2 99.3346 30.1677   6
   3   9   2 41.4663  7.2034   1
   3   9   2 64.5721  7.8248   1
  -4  -9  -2 3.53224 3.79166   1
  -4  -9  -2 -8.2760  6.2713   4
  -4  -9  -2 -0.6485  3.4968   1
   4   9   2 0.61987 3.56409   1
   4   9   2 -2.7091  9.6281   6
  -5  -9  -2 123.904  16.844   1
   5   9   2 119.900  17.225   6
   5   9   2 122.689  10.854   1
  -6  -9  -2 61.0242  9.3763   1
   6   9   2 78.6808 15.9166   6
   7 -10  -2 -11.927   9.895   1
  -7  10   2  8.4242 10.7743   1
   6 -10  -2 14.7908  9.9301   1
  -6  10   2 15.3176  9.0370   1
   5 -10  -2 19.5050  8.4165   1
  -5  10   2 2.45883 6.91300   1
   4 -10  -2 3.70989 5.25603   1
   4 -10  -2 8.02387 9.49643   1
  -4  10   2 -2.9014  6.9063   1
   3 -10  -2 37.5222  9.9600   7
   3 -10  -2 44.9677  9.4831   1
   3 -10  -2 35.3984  9.4565   1
  -3  10   2 37.6058  8.1694   1
   2 -10  -2 58.4111 10.9425   7
   2 -10  -2 76.3792 11.6625   1
   2 -10  -2 56.6639 12.7670   1
  -2  10   2 102.015  14.210   1
   1 -10  -2 90.7386 10.8005   1
   1 -10  -2 98.4648 13.9557   1
  -1  10   2 79.5242 12.0682   1
   0 -10  -2 2.87967 4.84217   7
   0 -10  -2 0.44436 5.16391   1
   0 -10  -2 8.04282 6.01514   1
   0  10   2 0.19078 7.69361   1
   0  10   2 1.39555 3.48009   3
  -1 -10  -2 5.93284 6.16760   1
  -1 -10  -2 9.98230 6.81058   7
  -1 -10  -2 8.06334 5.90435   1
   1  10   2 10.4751  5.7089   1
   1  10   2 5.61550 4.24983   3
  -2 -10  -2 184.496  20.988   1
  -2 -10  -2 239.166  23.839   7
   2  10   2 179.016  26.204   6
   2  10   2 244.315  25.117   3
  -3 -10  -2 98.6968 12.7188   1
   3  10   2 102.225  18.059   6
   3  10   2 110.088  14.622   3
  -4 -10  -2 54.2418 11.1749   1
   4  10   2 83.6336 13.4777   6
   4  10   2 69.9070 11.4319   3
  -5 -10  -2 81.2139 15.2106   1
   5  10   2 142.516  19.155   6
   5  10   2 98.0504 19.5682   3
   5 -11  -2  4.2732 10.9801   1
  -5  11   2  4.8238 12.1940   1
   4 -11  -2 268.272  32.604   1
   4 -11  -2 238.019  34.695   7
  -4  11   2 214.583  48.720   1
   3 -11  -2 9.80146 9.79777   7
   3 -11  -2 -2.6397  9.9295   1
  -3  11   2 29.2866 12.9875   1
   2 -11  -2 163.869  20.383   1
   2 -11  -2 100.896  14.397   7
  -2  11   2 121.390  22.348   1
   1 -11  -2 3.81341 8.06934   1
   1 -11  -2 12.2685  8.5210   7
  -1  11   2  3.7160 10.1013   1
   0 -11  -2 10.3416  5.4799   1
   0 -11  -2 4.63355 8.79777   7
  -1 -11  -2 15.7007  5.6629   1
  -1 -11  -2 19.5971  7.7921   7
  -2 -11  -2 120.054  16.569   1
   2  11   2 103.578  15.944   3
   2  11   2 113.448  18.797   6
  -3 -11  -2 299.888  51.011   1
   3  11   2 318.251  30.725   3
   3  11   2 353.231  38.373   6
   1   9  -3 -15.976  12.196   6
  -1  -9   3 6.21676 6.22370   1
   0   9  -3 -1.2822  8.1784   1
   0   9  -3 7.04989 7.04579   6
   0  -9   3 3.92781 7.56151   1
  -1   9  -3 21.0233  9.3113   1
  -1   9  -3 1.56042 7.26909   6
   1  -9   3 -0.2164  5.5260   7
   1  -9   3 6.92140 7.14098   1
  -2   9  -3 3.38908 7.65683   1
  -2   9  -3  0.2683 10.5463   6
   2  -9   3 6.96310 6.06600   7
   2  -9   3 3.64504 8.50660   1
  -3   9  -3 38.1158 10.6422   1
   3  -9   3 45.6848  9.6582   1
   3  -9   3 37.0624 12.0855   7
  -4   9  -3 22.0863 13.8233   1
   4  -9   3 17.3948 11.5681   1
   4  -9   3 23.9990 10.0175   7
   5  -9   3 44.5175 11.4087   7
   5  -9   3 30.4199 10.3120   1
   6  -9   3 46.8117 14.3669   1
   3   8  -3 60.8748 12.8277   6
  -3  -8   3 61.6731 13.8621   1
   2   8  -3 35.9688 13.3749   6
   2   8  -3 20.9973  9.2324   1
  -2  -8   3 24.9564  7.1794   1
   1   8  -3 56.9795 10.0105   6
   1   8  -3 45.4554 11.5801   1
  -1  -8   3 58.5741 13.7063   1
  -1  -8   3 49.9910 11.2286   1
   0   8  -3 -1.2850  6.0112   1
   0   8  -3 3.93029 5.35000   6
   0  -8   3 2.13903 6.63543   1
   0  -8   3 -3.9758  5.5245   1
  -1   8  -3 8.03091 6.66108   1
  -1   8  -3 13.1427  6.4239   6
   1  -8   3 7.35417 5.69840   1
   1  -8   3 21.9196  7.4867   7
   1  -8   3 20.8074  9.3146   1
  -2   8  -3 77.3707 13.5034   1
   2  -8   3 71.5943 15.0558   1
   2  -8   3 68.9104  9.3789   7
   2  -8   3 50.5326  9.1038   1
  -3   8  -3 520.466  49.712   1
   3  -8   3 534.423  56.058   7
   3  -8   3 489.068  45.142   1
   3  -8   3 451.838  45.928   1
  -4   8  -3 94.8136 14.4161   1
   4  -8   3 81.2388 12.5494   7
   4  -8   3 77.8263 14.5297   1
  -5   8  -3 77.5450 14.0716   1
   5  -8   3 92.1800 12.1504   1
  -6   8  -3 369.061  42.920   1
   6  -8   3 388.200  37.992   1
  -7   8  -3 56.9581 15.7215   1
   7  -8   3 46.3211 11.4501   1
  -8   8  -3 14.0131  9.9612   1
   8  -8   3 19.7666 10.0152   1
  -5  -7   3 114.641  16.644   1
   4   7  -3 -4.5561 11.2887   6
  -4  -7   3 3.93875 6.93079   4
  -4  -7   3 17.6136  7.2463   1
   3   7  -3 193.025  21.854   6
   3   7  -3 193.142  19.693   1
  -3  -7   3 196.982  24.027   1
  -3  -7   3 151.989  20.994   4
  -3  -7   3 178.157  28.053   1
   2   7  -3 120.007  16.192   6
   2   7  -3 91.2423 10.3176   1
  -2  -7   3 106.319  14.672   1
  -2  -7   3 82.9502 12.7659   4
  -2  -7   3 116.743  14.077   1
   1   7  -3 229.977  26.508   6
   1   7  -3 272.121  22.454   1
  -1  -7   3 244.968  24.482   1
  -1  -7   3 219.471  26.726   4
  -1  -7   3 279.243  23.711   1
   0   7  -3 2.83465 7.84315   6
   0   7  -3 15.2639  7.8121   1
   0  -7   3 4.68125 4.54044   7
   0  -7   3 5.74058 8.98612   1
   0  -7   3 26.8284  8.1972   1
   0  -7   3 2.31338 5.75745   4
  -1   7  -3 140.507  16.913   1
  -1   7  -3 116.073  13.869   6
   1  -7   3 108.338  12.427   1
   1  -7   3 131.138  17.520   4
   1  -7   3 120.387  12.001   7
   1  -7   3 90.6793 17.7763   1
  -2   7  -3 19.1887  5.7453   1
   2  -7   3 16.8382  5.4528   7
   2  -7   3 22.9628  7.0197   1
   2  -7   3 16.0540  6.5823   1
  -3   7  -3 23.9325  8.7543   1
   3  -7   3 36.0361  7.3549   1
   3  -7   3 32.5148  5.5461   7
   3  -7   3 19.9929  8.1033   1
  -4   7  -3 272.483  29.604   1
   4  -7   3 297.486  26.800   7
   4  -7   3 292.995  25.510   1
   4  -7   3 264.326  24.929   1
  -5   7  -3 103.517  14.059   1
   5  -7   3 87.8267 12.7729   1
   5  -7   3 54.8221 13.1679   1
  -6   7  -3 132.992  18.051   1
   6  -7   3 135.952  15.632   1
  -7   7  -3 278.917  32.050   1
   7  -7   3 327.288  35.642   1
  -8   7  -3 20.1638 11.7080   1
   8  -7   3  4.6751 10.7813   1
  -9   7  -3 32.2806 12.3058   1
   9  -7   3 14.8659 11.2152   1
  -6  -6   3 845.389  78.484   1
   5   6  -3 182.856  17.812   1
  -5  -6   3 188.106  21.274   1
   4   6  -3 5.20201 5.64924   1
   4   6  -3 7.74279 6.83600   7
   4   6  -3 7.56945 7.31947   6
  -4  -6   3 10.6668  8.3281   1
  -4  -6   3 9.21501 6.13795   4
   3   6  -3 96.3614 13.6136   6
   3   6  -3 97.2960 13.6178   7
   3   6  -3 111.901  13.774   1
  -3  -6   3 113.971  13.591   1
  -3  -6   3 97.1700 11.4165   1
  -3  -6   3 104.397  10.895   4
   2   6  -3 341.095  21.980   1
   2   6  -3 290.714  29.441   6
   2   6  -3 371.416  27.143   1
  -2  -6   3 358.779  24.826   1
  -2  -6   3 325.959  30.786   4
  -2  -6   3 330.117  34.657   1
   1   6  -3 677.699  44.236   1
   1   6  -3 653.917  40.014   6
   1   6  -3 572.858  60.057   1
  -1  -6   3 653.145  57.216   1
  -1  -6   3 568.109  55.322   1
  -1  -6   3 630.115  59.763   4
   0   6  -3 48.8287 10.1496   6
   0   6  -3 47.3008  6.8217   1
   0   6  -3 39.7216  8.6575   1
   0  -6   3 42.2316  8.3262   1
   0  -6   3 29.7724  6.2462   1
   0  -6   3 35.1311  5.8957   7
  -1   6  -3 9.12254 8.87284   1
  -1   6  -3 25.9435  5.1174   6
  -1   6  -3 24.5090  5.6328   1
   1  -6   3 21.1978  5.6922   7
   1  -6   3 13.1063  7.5895   1
  -2   6  -3 73.4248 11.3100   1
  -2   6  -3 90.2314 13.2419   1
   2  -6   3 84.0527 11.3547   1
   2  -6   3 92.1699 11.2588   1
   2  -6   3 69.8378  9.2205   7
  -3   6  -3 7.29523 6.06527   1
  -3   6  -3 5.44397 5.07514   1
   3  -6   3 5.15911 4.11750   7
   3  -6   3 -3.2709  5.2679   1
   3  -6   3 17.2279  6.0200   1
  -4   6  -3 967.839  64.946   1
  -4   6  -3 957.570 101.414   1
   4  -6   3 1010.95   90.50   1
   4  -6   3 1022.29   81.39   1
  -5   6  -3 3.93154 5.62160   1
  -5   6  -3 0.95957 6.24120   1
   5  -6   3 -2.8012  6.2136   1
   5  -6   3 7.53994 4.97799   1
  -6   6  -3 37.9188  9.1638   1
  -6   6  -3 31.7108  8.7646   1
   6  -6   3 37.4986  6.8367   1
   6  -6   3 39.6426  9.5382   1
  -7   6  -3 24.6609 11.1679   1
  -7   6  -3 27.8003  9.3891   1
   7  -6   3 43.1678  9.1509   1
  -8   6  -3 3.91491 7.04593   1
   8  -6   3 8.23700 7.71770   1
  -9   6  -3 -2.5525  6.3639   1
   9  -6   3 13.7187  9.2292   1
 -10   6  -3 -2.0600  7.0641   1
  10  -6   3 16.0741 10.1491   1
  -7  -5   3 -0.6180  5.6032   1
   6   5  -3 196.324  19.283   1
  -6  -5   3 172.096  30.394   1
   5   5  -3 639.337  58.591   7
   5   5  -3 630.474  56.302   1
  -5  -5   3 632.070  57.720   1
  -5  -5   3 664.695  59.227   4
  -5  -5   3 662.628  78.270   1
   4   5  -3 137.457  17.638   7
   4   5  -3 154.262  14.113   6
   4   5  -3 120.195  15.462   1
   4   5  -3 122.057  14.684   1
  -4  -5   3 167.843  19.773   1
  -4  -5   3 150.416  19.196   4
  -4  -5   3 138.551  14.044   1
   3   5  -3 1022.75   63.46   6
   3   5  -3 1016.57   73.62   7
   3   5  -3 984.080  82.834   1
   3   5  -3 998.198  75.830   1
  -3  -5   3 1011.13   94.08   1
  -3  -5   3 1038.98   75.87   1
  -3  -5   3 1030.33   90.45   4
   2   5  -3 263.571  16.151   7
   2   5  -3 251.992  24.680   1
   2   5  -3 266.073  21.398   1
   2   5  -3 325.434  17.894   6
  -2  -5   3 289.637  21.938   1
  -2  -5   3 263.471  21.250   4
  -2  -5   3 239.065  18.212   1
   1   5  -3 160.023  14.183   1
   1   5  -3 142.619  12.860   1
   1   5  -3 168.675  15.958   6
  -1  -5   3 185.042  21.061   1
  -1  -5   3 192.218  12.510   1
   0   5  -3 69.1536  8.9228   6
   0   5  -3 72.9634  8.2089   1
   0   5  -3 66.4710  7.0339   1
   0  -5   3 62.9570  6.4487   7
   0  -5   3 64.1125  8.1969   1
   0  -5   3 73.3178 11.8617   1
  -1   5  -3 229.135  17.433   6
  -1   5  -3 247.369  24.623   1
  -1   5  -3 191.892  16.021   1
   1  -5   3 251.276  28.143   1
   1  -5   3 223.078  15.904   1
   1  -5   3 205.411  17.657   7
  -2   5  -3 125.749  13.286   1
  -2   5  -3 130.878  12.837   1
   2  -5   3 138.563  11.983   7
   2  -5   3 152.055  16.592   1
   2  -5   3 133.252  10.519   1
  -3   5  -3 394.337  23.027   1
  -3   5  -3 371.983  26.665   1
   3  -5   3 383.359  34.036   1
   3  -5   3 387.126  21.347   1
  -4   5  -3 219.636  22.359   1
  -4   5  -3 240.701  18.862   1
   4  -5   3 229.275  18.905   1
   4  -5   3 195.291  27.308   1
  -5   5  -3 38.8019  7.8672   1
  -5   5  -3 29.8861  7.4566   1
   5  -5   3 27.3030  7.5778   1
   5  -5   3 26.5639  5.9732   1
  -6   5  -3 3.79524 4.18691   1
  -6   5  -3 -2.6840  5.9065   1
   6  -5   3 1.72724 6.07543   1
   6  -5   3 -0.1072  4.6464   1
  -7   5  -3 346.671  35.360   1
  -7   5  -3 348.160  24.793   1
   7  -5   3 349.785  30.815   1
   7  -5   3 341.575  29.317   1
  -8   5  -3 66.4055 11.6200   1
  -8   5  -3 49.8215 11.1660   1
   8  -5   3 56.1365 10.4401   1
  -9   5  -3 0.28973 3.10471   5
  -9   5  -3 10.7344  7.3108   1
  -9   5  -3 6.21957 8.56221   1
   9  -5   3 -7.2799  6.8248   1
 -10   5  -3 19.9925 11.2261   1
  10  -5   3 -3.5544 10.0012   1
 -11   5  -3 2.48229 9.20591   1
  11  -5   3 -6.5493  8.4706   1
   8   4  -3 2.68366 6.86300   2
  -8  -4   3 -2.5083  5.6380   1
   7   4  -3 17.4469  9.1561   1
  -7  -4   3 6.81868 5.95014   1
   6   4  -3 -0.6166  5.0061   1
   6   4  -3 -27.155  10.468   7
  -6  -4   3 4.11076 3.95062   1
  -6  -4   3 1.75383 2.68194   4
  -6  -4   3 -0.2931  5.3410   1
   5   4  -3 -5.1308  8.6347   1
   5   4  -3 -5.7166  8.1742   7
   5   4  -3 1.52354 5.90355   1
  -5  -4   3 5.26545 4.47041   1
  -5  -4   3 1.79856 3.59797   4
  -5  -4   3 -3.3143  6.0353   1
   4   4  -3 86.1379 11.8907   7
   4   4  -3 79.2089  9.9180   1
   4   4  -3 114.259  12.070   1
  -4  -4   3 96.3565 11.5164   4
  -4  -4   3 90.2478 11.8035   1
  -4  -4   3 106.451  11.341   1
   3   4  -3 103.587  11.257   1
   3   4  -3 91.7086 11.9629   1
   3   4  -3 113.863  12.763   6
   3   4  -3 106.581   9.124   7
  -3  -4   3 95.4744 10.8261   4
  -3  -4   3 78.0881 10.3622   1
  -3  -4   3 118.915  11.285   1
   2   4  -3 2285.42   97.53   6
   2   4  -3 2125.85   91.32   1
   2   4  -3 2277.19  152.66   1
   2   4  -3 2205.33  144.71   7
  -2  -4   3 2319.44  210.01   1
  -2  -4   3 2119.67  101.74   1
   1   4  -3 719.294  35.973   7
   1   4  -3 657.595  38.687   1
   1   4  -3 739.932  47.742   1
   1   4  -3 713.422  38.807   6
  -1  -4   3 676.785  40.802   1
  -1  -4   3 704.919  50.082   1
   0   4  -3 191.594  16.324   1
   0   4  -3 214.506  15.754   6
   0   4  -3 231.534  19.577   1
   0  -4   3 238.907  22.554   1
   0  -4   3 243.179  16.216   1
   0  -4   3 217.066  14.369   7
  -1   4  -3 1.88867 4.07287   1
  -1   4  -3 3.39165 3.81533   1
  -1   4  -3 2.97533 2.75843   6
   1  -4   3 6.44725 2.63168   7
   1  -4   3 2.52332 3.06668   1
   1  -4   3 4.05556 4.40308   1
  -2   4  -3 236.438  18.311   1
  -2   4  -3 226.963  13.815   1
   2  -4   3 229.824  14.210   1
   2  -4   3 246.672  13.862   7
   2  -4   3 219.609  17.702   1
  -3   4  -3 167.474  10.861   1
  -3   4  -3 134.943   9.262   1
   3  -4   3 116.412   9.530   1
   3  -4   3 132.965  10.844   1
  -4   4  -3 8.40867 3.93705   1
  -4   4  -3 3.63424 2.93930   1
   4  -4   3 8.30499 4.11589   1
   4  -4   3 -3.1316  4.0811   1
  -5   4  -3 186.135  17.510   1
  -5   4  -3 213.525  12.654   1
   5  -4   3 174.132  14.836   1
   5  -4   3 174.845  10.599   1
  -6   4  -3 99.3766 14.2372   1
  -6   4  -3 86.7002 10.4864   1
   6  -4   3 71.1035  9.6808   1
   6  -4   3 98.0291 10.0585   1
  -7   4  -3 480.581  43.169   1
  -7   4  -3 521.966  41.720   1
   7  -4   3 534.446  34.347   1
   7  -4   3 500.282  30.843   1
  -8   4  -3 294.874  28.809   1
  -8   4  -3 291.098  25.078   1
   8  -4   3 231.722  24.279   1
   8  -4   3 282.043  22.680   1
  -9   4  -3 138.414  15.387   1
  -9   4  -3 166.897   9.424   5
  -9   4  -3 183.694  23.463   1
   9  -4   3 146.747  12.877   3
   9  -4   3 167.412  18.406   1
 -10   4  -3 131.896  21.745   5
 -10   4  -3 138.845  18.794   1
 -10   4  -3 115.705  15.645   1
  10  -4   3 124.439  13.288   3
  10  -4   3 138.124  17.191   1
 -11   4  -3 231.400  31.671   1
  11  -4   3 163.420  22.989   3
  11  -4   3 199.731  17.582   1
   8   3  -3 10.9311  8.9294   2
  -8  -3   3 16.2594  8.1786   1
   7   3  -3 4.39876 6.00155   1
  -7  -3   3 5.53218 5.67282   1
  -7  -3   3 7.22516 5.59864   1
   6   3  -3 248.995  23.523   1
  -6  -3   3 232.304  28.449   1
  -6  -3   3 273.241  22.769   1
  -6  -3   3 251.809  31.050   4
   5   3  -3 104.421  13.402   1
  -5  -3   3 90.2545  8.0722   1
  -5  -3   3 79.3677 10.4334   6
  -5  -3   3 91.8333  9.4397   4
  -5  -3   3 98.9579 12.0242   1
   4   3  -3 44.3339  7.3773   1
   4   3  -3 51.2419  8.9636   1
   4   3  -3 60.3277  8.1884   7
  -4  -3   3 56.8561  7.0559   1
  -4  -3   3 57.4416  5.8315   4
  -4  -3   3 48.2938  8.4825   6
  -4  -3   3 48.1381  7.0801   1
   3   3  -3 18.3279  4.7297   1
   3   3  -3  6.8351 13.9357   7
  -3  -3   3 8.08971 3.79462   1
  -3  -3   3 14.6346  4.5790   6
  -3  -3   3 10.5536  2.7734   4
  -3  -3   3 15.7644  5.6192   1
   2   3  -3 356.418  29.269   1
   2   3  -3 396.294  22.520   1
   2   3  -3 359.774  22.510   7
   2   3  -3 361.794  17.918   6
  -2  -3   3 347.147  18.731   1
  -2  -3   3 360.516  19.393   1
   1   3  -3 145.824  12.664   7
   1   3  -3 143.827  13.366   1
   1   3  -3 145.365   8.917   6
   1   3  -3 154.355   9.128   1
  -1  -3   3 181.150  11.800   1
  -1  -3   3 171.139  10.836   1
   0   3  -3 317.935  14.618   1
   0   3  -3 289.713  18.074   6
   0   3  -3 311.850  14.624   1
   0  -3   3 308.173  28.163   1
   0  -3   3 281.397  18.126   1
  -1   3  -3 2347.24  155.02   6
  -1   3  -3 2423.43   82.82   1
  -1   3  -3 2237.22   58.81   1
   1  -3   3 2400.11   90.85   7
   1  -3   3 2540.78  115.96   1
   1  -3   3 2530.11  111.14   1
  -2   3  -3 12.3048  3.2644   1
  -2   3  -3 8.80294 4.63758   1
   2  -3   3 8.82778 4.85162   1
  -3   3  -3 18.0055  4.9977   1
  -3   3  -3 12.4164  3.8690   1
   3  -3   3 14.3760  4.8854   1
   3  -3   3 12.2307  3.3466   1
  -4   3  -3 411.125  20.490   1
  -4   3  -3 358.777  24.646   1
   4  -3   3 388.948  18.758   1
   4  -3   3 481.096  32.494   1
  -5   3  -3 739.218  53.396   1
  -5   3  -3 762.563  36.916   1
   5  -3   3 832.862  40.335   1
   5  -3   3 732.544  33.728   1
  -6   3  -3 2.87921 4.09795   1
  -6   3  -3 5.56137 4.05510   1
   6  -3   3 6.71232 4.44192   1
   6  -3   3 2.26103 3.88757   1
  -7   3  -3 512.629  44.605   1
  -7   3  -3 556.462  35.445   1
   7  -3   3 511.662  46.471   1
   7  -3   3 523.534  36.640   3
   7  -3   3 533.541  33.247   1
  -8   3  -3 955.588  53.034   2
  -8   3  -3 964.338  90.081   1
  -8   3  -3 945.262  58.643   5
  -8   3  -3 1024.24   80.22   1
   8  -3   3 934.236  71.560   1
   8  -3   3 878.716  87.564   1
   8  -3   3 948.878  83.083   3
  -9   3  -3 89.8504 13.0175   1
  -9   3  -3 94.0331 11.9206   1
  -9   3  -3 70.6229  9.3986   2
  -9   3  -3 78.9855  7.6537   5
   9  -3   3 87.9451  9.3632   3
   9  -3   3 65.8098 12.0127   1
 -10   3  -3 76.7756 12.1058   2
 -10   3  -3 78.2850 12.9506   1
 -10   3  -3 95.9364 10.9342   5
 -10   3  -3 97.7212 13.7155   1
  10  -3   3 104.474  11.033   3
  10  -3   3 99.1850 19.6325   1
 -11   3  -3 62.5259  9.9650   1
  11  -3   3 64.1590 10.7449   1
  11  -3   3 56.2098  7.9073   3
   9   2  -3 -0.7947  5.7614   2
  -9  -2   3 19.5635  6.7772   1
   8   2  -3 174.961  23.315   2
   8   2  -3 171.438  18.282   1
  -8  -2   3 109.836  16.751   1
   7   2  -3 339.823  47.715   2
   7   2  -3 377.547  49.708   1
  -7  -2   3 341.688  33.671   1
  -7  -2   3 371.263  34.529   1
   6   2  -3 76.2566  9.5424   1
   6   2  -3 56.4440  8.0501   1
  -6  -2   3 39.9384  9.4523   6
  -6  -2   3 79.8551 10.2864   1
  -6  -2   3 74.9279 11.2007   1
   5   2  -3 5.23121 6.03935   1
   5   2  -3 2.88140 3.84567   1
  -5  -2   3 2.00219 3.53078   1
  -5  -2   3 1.89988 1.53876   4
  -5  -2   3 7.94922 5.85195   1
  -5  -2   3 2.31844 5.51127   6
   4   2  -3 299.804  18.780   1
   4   2  -3 294.598  14.405   1
  -4  -2   3 258.524  28.516   6
  -4  -2   3 256.393  15.256   1
  -4  -2   3 281.039  24.275   1
  -4  -2   3 276.827  14.979   4
   3   2  -3 50.4107  6.7253   1
   3   2  -3 47.0032  5.7255   1
  -3  -2   3 51.0758  6.3788   6
  -3  -2   3 46.3058  5.6403   1
  -3  -2   3 55.7093  6.4825   1
   2   2  -3 647.836  27.170   7
   2   2  -3 602.491  21.419   1
   2   2  -3 579.956  29.392   1
  -2  -2   3 621.439  35.933   6
  -2  -2   3 657.114  40.235   1
  -2  -2   3 588.377  27.832   1
   1   2  -3 40.1255  3.5331   7
   1   2  -3 47.2838  5.7145   1
   1   2  -3 43.5646  5.0608   6
   1   2  -3 52.8234  5.6481   1
  -1  -2   3 55.2329  6.7511   1
  -1  -2   3 45.1549  4.6377   6
   0   2  -3 1405.88   64.62   6
   0   2  -3 1581.45   71.49   7
   0   2  -3 1469.27   65.52   1
   0   2  -3 1329.03   45.93   1
   0  -2   3 1570.44   70.76   1
   0  -2   3 1511.00   77.98   1
  -1   2  -3 1346.95   52.08   1
  -1   2  -3 1323.22   32.61   1
  -1   2  -3 1380.50   70.92   6
   1  -2   3 1401.32   60.13   1
   1  -2   3 1399.80  106.41   1
   1  -2   3 1396.99   67.75   7
  -2   2  -3 205.677  12.706   1
  -2   2  -3 227.511  10.093   1
   2  -2   3 212.113  11.107   1
   2  -2   3 194.576  12.949   1
  -3   2  -3 436.220  16.664   1
  -3   2  -3 435.137  16.725   1
  -3   2  -3 445.654  20.369   3
   3  -2   3 447.190  29.633   1
   3  -2   3 440.434  20.678   1
  -4   2  -3 13.3805  4.2913   1
  -4   2  -3 16.8172  4.4835   1
   4  -2   3 20.3065  4.4346   1
   4  -2   3 18.9704  4.5363   1
  -5   2  -3 29.3487  4.1823   1
  -5   2  -3 23.3859  4.9063   1
   5  -2   3 25.3720  4.8334   1
   5  -2   3 25.2356  3.5908   3
   5  -2   3 23.5627  6.0936   1
  -6   2  -3 26.9830  5.5206   1
  -6   2  -3 20.4645  3.9174   1
   6  -2   3 28.8876  5.5466   1
   6  -2   3 22.5457  2.9374   3
   6  -2   3 30.7260  5.4992   1
  -7   2  -3 15.5916  2.7610   5
  -7   2  -3 10.1930  3.7698   1
  -7   2  -3 24.5413  6.9109   2
  -7   2  -3 10.5338  4.4583   1
   7  -2   3 4.31535 3.85792   1
   7  -2   3 14.3272  3.2777   3
   7  -2   3 10.1291  4.9119   1
  -8   2  -3 333.839  32.354   1
  -8   2  -3 334.995  17.061   5
  -8   2  -3 287.025  25.915   2
  -8   2  -3 302.319  32.058   1
   8  -2   3 313.366  31.476   1
   8  -2   3 314.302  28.441   3
   8  -2   3 285.056  26.774   1
  -9   2  -3 3.16266 5.71510   2
  -9   2  -3 0.56125 5.57897   1
  -9   2  -3 4.06877 4.80896   1
  -9   2  -3 -1.0635  3.2124   5
   9  -2   3 -3.1726  4.8214   1
   9  -2   3 -5.0092  3.7716   3
   9  -2   3 8.65594 5.75501   1
 -10   2  -3 156.924  16.518   2
 -10   2  -3 254.551  20.336   1
 -10   2  -3 184.013  24.477   6
 -10   2  -3 227.919  17.917   1
  10  -2   3 202.362  24.308   3
  10  -2   3 224.045  17.756   1
 -11   2  -3 12.8710  8.6106   1
  11  -2   3 1.44987 9.43535   1
  11  -2   3 -5.6174  4.7519   3
 -12   2  -3 8.01429 6.90407   1
  12  -2   3  1.5208 10.3175   3
   9   1  -3 -7.6576  5.1791   1
   9   1  -3 -2.3392  6.0357   2
  -9  -1   3 -2.1134  5.1182   1
   8   1  -3 10.0096  9.7602   1
   8   1  -3 21.3389  5.6162   2
  -8  -1   3 20.8691  7.2309   1
  -8  -1   3 1.58236 7.31608   1
   7   1  -3 215.617  30.233   2
   7   1  -3 268.164  28.638   1
  -7  -1   3 258.288  29.340   1
  -7  -1   3 266.596  35.522   1
   6   1  -3 15.9782  7.7279   1
   6   1  -3 7.35854 4.35812   1
   6   1  -3 9.54185 4.52482   2
  -6  -1   3 21.0572  7.9599   1
  -6  -1   3 12.3199  4.8391   1
  -6  -1   3 6.02128 7.25173   6
   5   1  -3 57.0717  6.4576   1
   5   1  -3 68.9904  9.4827   1
  -5  -1   3 74.4433  6.7140   1
  -5  -1   3 68.0074  3.7795   4
  -5  -1   3 56.0707  8.6162   1
  -5  -1   3 40.2677  7.4548   6
   4   1  -3 43.2931  4.9707   1
   4   1  -3 65.5127  8.2707   1
  -4  -1   3 45.7591  5.4440   6
  -4  -1   3 64.3193  8.2433   1
  -4  -1   3 47.9682  5.2338   1
   3   1  -3 1519.38   45.64   1
   3   1  -3 1578.31   73.63   1
  -3  -1   3 1559.13   54.85   1
  -3  -1   3 1597.71   83.43   6
  -3  -1   3 1565.13   80.68   1
   2   1  -3 583.519  22.778   1
   2   1  -3 548.027  20.725   1
  -2  -1   3 527.668  23.225   6
  -2  -1   3 578.054  19.844   1
  -2  -1   3 550.799  28.018   1
   1   1  -3 1306.65   73.36   1
   1   1  -3 1339.79   63.85   1
  -1  -1   3 1263.13   42.61   1
  -1  -1   3 1307.20   51.09   6
  -1  -1   3 1301.71   66.45   1
   0   1  -3 110.300   7.864   1
   0   1  -3 107.681   6.587   7
   0   1  -3 117.440   6.474   6
   0   1  -3 111.343   8.597   1
   0  -1   3 106.122   7.908   1
   0  -1   3 93.5137  6.6512   6
   0  -1   3 120.734   8.330   1
  -1   1  -3 336.118  17.506   1
  -1   1  -3 293.951  14.252   1
  -1   1  -3 315.382  15.732   6
   1  -1   3 297.009  12.144   1
   1  -1   3 329.155  17.193   7
   1  -1   3 309.749  15.804   1
  -2   1  -3 2302.84   96.37   1
  -2   1  -3 2268.52   80.40   1
   2  -1   3 2306.17   83.97   1
   2  -1   3 2321.59  157.14   1
  -3   1  -3 57.1321  5.3330   1
  -3   1  -3 58.2625  5.5741   1
  -3   1  -3 66.5997  4.3928   3
   3  -1   3 55.6927  5.3246   1
   3  -1   3 60.3661  5.7610   1
  -4   1  -3 177.616  10.928   1
  -4   1  -3 181.491  11.336   1
   4  -1   3 217.613  17.477   1
   4  -1   3 175.337  10.999   1
   4  -1   3 174.813  12.955   3
  -5   1  -3 22.6710  3.7706   1
  -5   1  -3 18.7396  3.7893   1
   5  -1   3 24.8950  4.7139   1
   5  -1   3 27.6259  4.2912   3
   5  -1   3 30.2564  4.3393   1
  -6   1  -3 177.460  12.819   2
  -6   1  -3 164.242  11.027   1
  -6   1  -3 195.531  12.758   1
  -6   1  -3 190.734  12.158   5
   6  -1   3 189.438  13.243   3
   6  -1   3 193.982  11.099   1
   6  -1   3 177.984  13.999   1
  -7   1  -3 20.8061  5.8281   2
  -7   1  -3 25.3454  7.2903   1
  -7   1  -3 16.0324  4.2972   1
  -7   1  -3 13.6143  3.7056   5
   7  -1   3 23.0894  3.6617   3
   7  -1   3 18.7549  5.0465   1
   7  -1   3 26.3610  4.8506   1
  -8   1  -3 18.2482  4.4316   5
  -8   1  -3 16.6190  4.7460   1
  -8   1  -3 17.8224  5.3699   2
  -8   1  -3 10.4240  4.3172   6
  -8   1  -3 20.6125  4.7815   1
   8  -1   3 11.9397  4.9050   3
   8  -1   3 6.61277 4.49673   1
   8  -1   3 8.69613 5.01198   1
  -9   1  -3 4.58465 4.58834   1
  -9   1  -3 18.0709  8.8567   2
  -9   1  -3 7.78785 4.84662   1
  -9   1  -3 11.2930  5.0911   6
   9  -1   3 13.9446  6.2342   1
   9  -1   3 10.0956  5.0204   1
 -10   1  -3 6.05267 6.19184   6
 -10   1  -3 3.49155 6.35739   2
 -10   1  -3 -1.7483  4.4262   1
 -10   1  -3 -1.8061  5.4354   1
  10  -1   3 5.53229 4.97331   1
 -11   1  -3 32.4984 10.3053   1
  11  -1   3 53.4635 11.2861   3
  11  -1   3 64.3254 11.3184   1
 -12   1  -3 150.521  20.039   1
  12  -1   3 163.890  24.545   3
   9   0  -3 4.79052 7.36881   1
  -9   0   3 -1.4221  6.0666   1
   8   0  -3 -0.6878  5.3969   2
   8   0  -3 2.45800 2.45627   5
   8   0  -3 6.24680 7.73067   1
  -8   0   3 -3.9607  7.5091   1
  -8   0   3 4.56165 7.24938   1
   7   0  -3 25.4780  8.0227   1
   7   0  -3 3.82418 8.24288   1
   7   0  -3 13.2590  4.9444   2
  -7   0   3 7.81479 7.21586   6
  -7   0   3 12.4347  8.3554   1
  -7   0   3 27.1423  6.9428   1
   6   0  -3 23.6209  6.5313   1
   6   0  -3 46.9099  8.5914   1
   6   0  -3 32.9009  4.6325   2
  -6   0   3 45.6377  9.5754   6
  -6   0   3 41.3351  8.5894   1
  -6   0   3 36.8891  6.7076   1
   5   0  -3 527.590  43.599   1
   5   0  -3 496.793  25.455   2
   5   0  -3 436.583  25.016   1
  -5   0   3 512.187  37.577   1
  -5   0   3 543.605  34.335   6
  -5   0   3 447.225  29.726   1
   4   0  -3 217.877  16.215   1
   4   0  -3 258.168  15.064   1
  -4   0   3 242.069  15.654   6
  -4   0   3 238.845  16.286   1
  -4   0   3 219.634  12.291   1
   3   0  -3 1539.47   49.39   1
   3   0  -3 1587.53   57.22   1
  -3   0   3 1621.17   79.55   6
  -3   0   3 1632.88   67.13   1
  -3   0   3 1551.19   60.72   1
   2   0  -3 334.989  22.077   1
   2   0  -3 323.941  12.187   1
  -2   0   3 341.761  16.094   1
  -2   0   3 338.666  18.113   1
  -2   0   3 312.398  17.535   6
   1   0  -3 409.085  16.508   1
   1   0  -3 405.315  15.750   1
  -1   0   3 428.258  20.251   1
  -1   0   3 430.605  22.543   1
  -1   0   3 382.098  17.739   6
   0   0  -3 28.1951  4.4523   1
   0   0  -3 34.9235  4.5434   1
   0   0   3 18.5238  2.9504   6
   0   0   3 21.9190  3.8256   1
   0   0   3 24.6807  2.9361   1
  -1   0  -3 1226.20   66.84   1
  -1   0  -3 1158.23   54.42   1
   1   0   3 1228.37   51.50   1
   1   0   3 1151.48   53.70   6
   1   0   3 1165.12   60.10   1
  -2   0  -3 1495.80   51.73   1
  -2   0  -3 1608.77   86.33   1
   2   0   3 1632.51  109.96   1
   2   0   3 1597.74   71.31   1
  -3   0  -3 5369.09  234.12   6
  -3   0  -3 5034.67  218.37   3
  -3   0  -3 5282.87  210.30   1
  -3   0  -3 5251.53  226.92   1
   3   0   3 5224.85  174.85   1
   3   0   3 5531.76  173.87   1
   3   0   3 5217.93  202.35   3
  -4   0  -3 3611.20  186.58   5
  -4   0  -3 3786.52  200.05   6
  -4   0  -3 3578.69  157.14   2
  -4   0  -3 3604.51  160.19   1
  -4   0  -3 3733.83  197.64   1
   4   0   3 3756.99  194.24   1
   4   0   3 3555.07  176.69   3
   4   0   3 3740.71  170.68   1
  -5   0  -3 206.835  14.820   5
  -5   0  -3 189.408  11.042   6
  -5   0  -3 176.112  13.227   2
  -5   0  -3 207.358  12.796   1
  -5   0  -3 197.402   9.333   1
   5   0   3 211.593  14.425   3
   5   0   3 199.834  12.807   1
   5   0   3 228.811  14.859   1
  -6   0  -3 166.339  12.055   2
  -6   0  -3 199.857  17.696   5
  -6   0  -3 235.112  12.744   1
  -6   0  -3 183.641  13.311   1
  -6   0  -3 225.198  17.248   6
   6   0   3 191.349  13.466   3
   6   0   3 209.060  14.055   1
   6   0   3 205.653  17.430   1
  -7   0  -3 107.350  10.052   2
  -7   0  -3 93.8124  8.0315   5
  -7   0  -3 78.6667  8.3164   1
  -7   0  -3 93.3970  8.0615   1
  -7   0  -3 90.4852  9.5418   6
   7   0   3 103.357   7.282   1
   7   0   3 103.790   9.346   1
  -8   0  -3 174.882  12.355   1
  -8   0  -3 138.300  14.065   1
  -8   0  -3 170.336  16.536   6
  -8   0  -3 151.545  13.928   2
   8   0   3 160.006  13.999   1
   8   0   3 134.806  13.367   1
  -9   0  -3 74.9097 11.4535   2
  -9   0  -3 112.076  12.472   1
  -9   0  -3 105.658  11.983   1
  -9   0  -3 74.9257 11.7611   6
   9   0   3 78.2352 10.1630   1
   9   0   3 86.1992 11.0482   1
 -10   0  -3 4.84019 5.48490   6
 -10   0  -3 14.5482  8.6921   1
 -10   0  -3 15.2557  5.3504   1
  10   0   3 -0.4526  4.4942   1
  10   0   3 0.00000 6.86414   1
 -11   0  -3 38.3737  9.5890   1
 -12   0  -3 20.8933  8.6102   1
  10  -1  -3 126.022  18.671   1
 -10   1   3 159.410  23.276   1
   9  -1  -3 -0.2244  6.7365   1
  -9   1   3  1.1563 10.8635   1
  -9   1   3 8.93635 6.38825   1
   8  -1  -3 128.782  13.332   5
   8  -1  -3 127.808  21.364   1
  -8   1   3 148.870  16.477   1
  -8   1   3 175.906  16.838   1
   7  -1  -3 -4.7178  5.0028   1
   7  -1  -3 3.24533 1.55861   5
   7  -1  -3 8.22346 7.38109   1
  -7   1   3 0.50605 5.17742   1
  -7   1   3 0.66760 8.43862   1
  -7   1   3 3.56477 6.27294   6
   6  -1  -3 257.539  19.869   2
   6  -1  -3 253.584  22.126   1
   6  -1  -3 213.707  17.922   1
  -6   1   3 222.043  25.864   6
  -6   1   3 227.837  19.863   1
  -6   1   3 253.940  19.925   1
   5  -1  -3 225.878  15.410   1
   5  -1  -3 204.033  12.726   2
   5  -1  -3 199.444  14.292   1
  -5   1   3 183.092  14.477   1
  -5   1   3 194.642  11.951   1
   4  -1  -3 1422.85   55.72   1
   4  -1  -3 1441.52   85.09   1
   4  -1  -3 1333.94   48.73   2
  -4   1   3 1371.40   74.83   1
  -4   1   3 1343.92   78.49   4
  -4   1   3 1493.12   61.27   1
   3  -1  -3 13.2724  3.7886   1
   3  -1  -3 14.1323  4.3692   1
  -3   1   3 12.4408  3.6727   1
  -3   1   3 4.69351 3.64453   1
   2  -1  -3 2156.06   92.86   1
   2  -1  -3 2201.61   95.55   1
  -2   1   3 2240.10  101.51   1
  -2   1   3 2078.39   64.04   1
   1  -1  -3 370.412  14.205   1
   1  -1  -3 385.366  17.868   1
  -1   1   3 389.442  14.057   1
  -1   1   3 418.826  17.956   1
   0  -1  -3 590.047  33.910   1
   0  -1  -3 577.769  22.830   1
   0   1   3 593.050  31.312   1
   0   1   3 570.200  26.372   1
  -1  -1  -3 75.9791  5.1539   1
  -1  -1  -3 75.6830 20.2234   1
   1   1   3 60.3701  4.4723   1
   1   1   3 94.7455  9.9946   1
  -2  -1  -3 1136.89   52.32   5
  -2  -1  -3 1117.83   43.23   2
  -2  -1  -3 1135.29   42.63   1
  -2  -1  -3 1105.69   47.15   1
  -2  -1  -3 1158.93   64.39   3
   2   1   3 1183.75   42.38   1
   2   1   3 1184.80   54.95   1
  -3  -1  -3 3003.25  142.95   5
  -3  -1  -3 2842.50  135.20   3
  -3  -1  -3 3020.55  135.01   1
  -3  -1  -3 2845.51  137.59   1
  -3  -1  -3 2888.07  100.77   2
   3   1   3 2917.16  200.58   3
   3   1   3 2932.27  106.32   1
   3   1   3 2967.43  130.78   1
   3   1   3 2980.05  108.29   6
  -4  -1  -3 1143.51   36.06   1
  -4  -1  -3 1152.25   77.89   6
  -4  -1  -3 1102.84   62.19   1
  -4  -1  -3 1152.89   79.49   5
  -4  -1  -3 1178.36   57.02   2
   4   1   3 1120.27   60.80   3
   4   1   3 1150.13   36.28   1
   4   1   3 1127.94   53.88   1
  -5  -1  -3 5618.95  229.80   1
  -5  -1  -3 5568.73  260.54   2
  -5  -1  -3 5400.15  322.51   5
  -5  -1  -3 5285.39  225.21   1
  -5  -1  -3 5625.25  323.87   6
   5   1   3 5512.09  225.68   1
   5   1   3 5532.48  325.96   3
   5   1   3 5582.14  300.99   1
   5   1   3 5614.43  305.06   5
  -6  -1  -3 621.012  40.203   6
  -6  -1  -3 527.689  31.332   2
  -6  -1  -3 695.094  30.472   1
  -6  -1  -3 593.313  34.301   5
  -6  -1  -3 604.593  25.983   1
   6   1   3 631.101  35.880   1
   6   1   3 625.651  36.995   1
   6   1   3 651.310  35.749   5
  -7  -1  -3 212.859  10.627   1
  -7  -1  -3 221.784  13.813   1
  -7  -1  -3 201.708  16.101   6
  -7  -1  -3 225.598  16.628   2
   7   1   3 191.920  12.691   1
   7   1   3 243.343  18.675   1
  -8  -1  -3 357.549  23.639   1
  -8  -1  -3 322.473  31.753   1
  -8  -1  -3 321.058  32.435   6
   8   1   3 415.074  26.724   1
   8   1   3 328.792  20.471   1
  -9  -1  -3 150.821  12.732   1
  -9  -1  -3 135.549  11.915   1
  -9  -1  -3 108.454  15.430   6
   9   1   3 95.8347 13.2074   1
   9   1   3 112.962  11.562   1
 -10  -1  -3 -6.2572  6.1509   6
 -10  -1  -3 8.08006 4.38165   1
 -10  -1  -3 0.55827 3.12470   1
  10   1   3 7.28439 4.92668   1
  10   1   3 0.74196 1.92163   4
  10   1   3 3.50907 5.86830   1
 -11  -1  -3 -1.5748  4.1598   1
 -12  -1  -3 65.8169  9.5360   1
  10  -2  -3 44.1069 11.8500   1
 -10   2   3 72.7645 12.1306   1
   9  -2  -3 0.11355 9.55606   1
  -9   2   3 0.63084 8.93949   1
  -9   2   3 -2.8505 11.4014   1
   8  -2  -3 197.721  16.631   1
  -8   2   3 206.517  24.934   1
  -8   2   3 208.562  19.704   1
   7  -2  -3 348.969  22.127   1
   7  -2  -3 286.719  32.978   1
  -7   2   3 281.873  26.447   1
  -7   2   3 318.486  26.852   1
   6  -2  -3 288.456  15.525   1
   6  -2  -3 212.366  11.966   5
   6  -2  -3 281.966  27.422   1
  -6   2   3 256.483  32.850   1
  -6   2   3 260.034  23.609   1
   5  -2  -3 106.066  10.168   1
   5  -2  -3 87.2057 11.0986   1
  -5   2   3 105.243   8.768   1
  -5   2   3 74.2118 10.6758   1
   4  -2  -3 1026.22   43.10   1
   4  -2  -3 986.674  73.549   1
  -4   2   3 1001.66   53.65   1
  -4   2   3 1026.46   58.12   1
  -4   2   3 995.732  50.458   4
   3  -2  -3 629.529  34.602   1
   3  -2  -3 541.158  32.975   1
  -3   2   3 558.534  38.193   4
  -3   2   3 576.163  22.474   1
   2  -2  -3 212.582  11.169   1
   2  -2  -3 225.906  11.452   1
  -2   2   3 241.272  13.515   1
  -2   2   3 214.263  10.213   4
  -2   2   3 233.131  12.226   1
   1  -2  -3 4673.71  240.80   5
   1  -2  -3 4754.23  232.40   1
   1  -2  -3 4940.15  168.02   1
  -1   2   3 4784.70  129.00   1
  -1   2   3 4770.07  166.34   1
   0  -2  -3 335.149  14.919   5
   0  -2  -3 338.610  17.372   1
   0  -2  -3 346.094  16.000   1
   0   2   3 322.334  13.299   2
   0   2   3 333.862  14.423   1
   0   2   3 335.046  19.057   1
  -1  -2  -3 1222.58   73.07   3
  -1  -2  -3 1161.39   56.06   1
  -1  -2  -3 1205.85   66.98   2
  -1  -2  -3 1191.48   62.14   5
  -1  -2  -3 1224.36   62.40   7
  -1  -2  -3 1148.50   44.76   1
   1   2   3 1149.23   50.21   1
   1   2   3 1235.09   64.73   2
   1   2   3 1165.73   53.36   5
   1   2   3 1251.66   57.55   1
  -2  -2  -3 3000.53  166.19   1
  -2  -2  -3 3078.41  164.76   5
  -2  -2  -3 2868.89  138.76   1
  -2  -2  -3 2983.00  146.39   3
  -2  -2  -3 3053.19  195.09   2
   2   2   3 2963.11  126.56   2
   2   2   3 3057.03  144.65   5
   2   2   3 3056.42  171.77   3
   2   2   3 2900.83  164.35   1
   2   2   3 2996.95  172.18   7
   2   2   3 3168.14  128.65   1
  -3  -2  -3 23.3198  2.1938   1
  -3  -2  -3 27.2353  4.5874   2
  -3  -2  -3 23.1532  4.8252   5
   3   2   3 29.4244  3.4073   5
   3   2   3 26.1739  2.1829   1
   3   2   3 25.8701  2.0036   1
   3   2   3 36.5035  5.0559   3
   3   2   3 24.7828  3.3872   6
   3   2   3 22.2192  3.5704   2
  -4  -2  -3 152.104   9.318   5
  -4  -2  -3 151.987  10.781   1
   4   2   3 141.172   8.782   6
   4   2   3 148.008  10.153   1
   4   2   3 148.007  10.009   2
   4   2   3 153.649   8.807   1
   4   2   3 161.313   8.717   5
   4   2   3 156.200   9.888   3
  -5  -2  -3 727.589  45.446   6
  -5  -2  -3 681.945  34.164   1
  -5  -2  -3 680.483  28.527   5
   5   2   3 687.622  35.102   1
   5   2   3 671.361  28.944   5
   5   2   3 689.307  34.211   2
   5   2   3 681.102  34.479   6
   5   2   3 678.737  32.638   1
  -6  -2  -3 456.467  35.158   1
  -6  -2  -3 462.844  17.596   1
  -6  -2  -3 484.333  33.255   6
   6   2   3 476.780  37.997   1
   6   2   3 499.239  22.753   1
   6   2   3 495.707  26.638   5
   6   2   3 472.197  31.397   2
  -7  -2  -3 173.407  17.768   6
  -7  -2  -3 220.835  13.766   1
  -7  -2  -3 207.254  18.511   1
   7   2   3 198.199  17.901   5
   7   2   3 193.478  16.738   1
   7   2   3 191.886  15.669   2
   7   2   3 193.893  17.055   1
  -8  -2  -3 422.155  44.379   6
  -8  -2  -3 421.811  25.765   1
   8   2   3 433.462  39.026   1
   8   2   3 434.304  29.257   2
   8   2   3 447.783  39.520   1
   8   2   3 407.710  37.341   4
   8   2   3 473.185  33.492   5
  -9  -2  -3 30.9158  8.6148   6
  -9  -2  -3 28.5592  4.6434   1
  -9  -2  -3 33.1703  5.2661   1
   9   2   3 25.5316  6.5557   2
   9   2   3 33.9476  6.2706   1
   9   2   3 16.3741  6.3452   5
   9   2   3 22.6091  4.7818   1
 -10  -2  -3 4.60881 3.73059   1
 -10  -2  -3 1.66356 6.41261   6
 -10  -2  -3 19.2384  5.5318   1
  10   2   3 5.78230 5.55090   1
  10   2   3 11.7595  3.3507   4
  10   2   3 3.54508 6.39306   1
 -11  -2  -3 44.6137  8.8451   1
  10  -3  -3 10.6060  8.4970   1
 -10   3   3 -3.8953  6.3520   1
   9  -3  -3 10.1362  8.8859   1
  -9   3   3 12.6894  9.2633   1
  -9   3   3 17.1638  8.4524   1
   8  -3  -3 120.677  15.061   1
  -8   3   3 110.797  14.597   1
  -8   3   3 94.8560 11.7650   1
   7  -3  -3 500.270  69.293   1
   7  -3  -3 444.859  33.730   1
  -7   3   3 496.936  44.009   1
   6  -3  -3 787.586  59.554   1
   6  -3  -3 771.703  42.658   1
  -6   3   3 711.216  41.605   1
  -6   3   3 785.835  55.162   1
   5  -3  -3 216.137  22.065   1
   5  -3  -3 206.119  13.369   1
  -5   3   3 247.916  18.509   1
  -5   3   3 248.134  16.863   1
   4  -3  -3 469.874  36.264   1
   4  -3  -3 391.849  21.724   1
  -4   3   3 432.617  23.650   1
  -4   3   3 395.253  20.956   1
  -4   3   3 437.502  25.769   4
   3  -3  -3 59.7701  7.6928   1
   3  -3  -3 74.5897  8.1377   1
   3  -3  -3 46.8432  3.3044   5
  -3   3   3 53.3079  6.7763   1
  -3   3   3 62.8342  9.1862   1
  -3   3   3 55.9785  5.1992   4
   2  -3  -3 302.125  12.231   5
   2  -3  -3 303.971  24.769   1
   2  -3  -3 284.671  15.541   1
  -2   3   3 307.671  20.590   1
  -2   3   3 305.862  20.053   1
  -2   3   3 301.938  17.475   4
   1  -3  -3 53.9919  4.3746   5
   1  -3  -3 61.9014  5.9411   1
   1  -3  -3 53.4611  5.0291   1
  -1   3   3 66.4060  5.9469   1
  -1   3   3 51.3146  5.3669   1
  -1   3   3 64.4886  3.9204   5
  -1   3   3 68.7879  5.7582   4
   0  -3  -3 479.485  22.095   1
   0  -3  -3 541.846  23.907   5
   0  -3  -3 525.439  18.920   1
   0   3   3 488.361  22.193   4
   0   3   3 517.166  22.912   5
   0   3   3 473.845  20.048   1
   0   3   3 527.897  31.481   1
  -1  -3  -3 1675.53   63.61   5
  -1  -3  -3 1758.35   81.87   3
  -1  -3  -3 1798.54   68.12   1
  -1  -3  -3 1664.95   88.61   1
  -1  -3  -3 1654.04   95.44   7
   1   3   3 1739.24   79.53   4
   1   3   3 1647.40   67.95   5
   1   3   3 1659.63  102.66   1
   1   3   3 1734.74   80.82   1
  -2  -3  -3 -0.3726  1.9759   3
  -2  -3  -3 -0.9069  0.8073   1
  -2  -3  -3 2.26239 2.36106   5
  -2  -3  -3 0.37480 1.97652   7
  -2  -3  -3 -0.5664  0.3908   1
   2   3   3 1.23536 0.76257   1
   2   3   3 -1.5927  2.2644   2
   2   3   3 1.51804 2.34287   4
   2   3   3 1.64542 0.99750   1
   2   3   3 -0.0631  1.2769   7
   2   3   3 -0.1395  2.5118   5
   2   3   3 -0.2874  3.0238   3
  -3  -3  -3 2507.62  100.33   5
   3   3   3 2512.58  137.21   4
   3   3   3 2576.91  104.62   2
   3   3   3 2549.46  136.24   5
   3   3   3 2457.19  116.69   3
   3   3   3 2523.67  137.70   7
   3   3   3 2473.89  154.48   6
   4   3   3 716.044  38.690   6
   4   3   3 663.151  32.506   5
   4   3   3 736.471  40.019   2
   4   3   3 737.201  42.600   3
   4   3   3 732.346  49.039   4
  -5  -3  -3 100.904   5.252   1
  -5  -3  -3 112.998   9.224   1
   5   3   3 114.179  10.092   2
   5   3   3 103.732  11.846   6
   5   3   3 110.860   9.018   5
   5   3   3 112.784   6.848   4
   5   3   3 111.516   5.044   1
   5   3   3 97.6742  6.7280   1
  -6  -3  -3 106.534  10.101   1
  -6  -3  -3 109.774   9.771   6
   6   3   3 88.5600 10.3454   5
   6   3   3 106.412   8.395   6
   6   3   3 123.220  10.013   4
   6   3   3 115.836   6.243   1
   6   3   3 111.884  12.887   2
   6   3   3 97.7461  8.3316   1
  -7  -3  -3 300.920  22.401   6
  -7  -3  -3 266.792  13.447   1
   7   3   3 296.783  21.330   2
   7   3   3 304.416  18.478   5
   7   3   3 284.258  32.147   1
   7   3   3 288.393  17.370   4
   7   3   3 299.868  23.110   1
  -8  -3  -3 2.54170 5.67997   6
  -8  -3  -3 11.1783  3.0387   1
  -8  -3  -3 14.5948  3.0960   1
   8   3   3 17.0402  3.7126   1
   8   3   3 17.6766  6.5880   2
   8   3   3 5.38180 4.41696   4
   8   3   3 13.9444  4.6021   5
   8   3   3 16.4536  3.9330   1
  -9  -3  -3 538.535  32.215   1
  -9  -3  -3 476.133  34.470   6
  -9  -3  -3 475.518  45.444   1
   9   3   3 513.223  51.484   1
   9   3   3 514.142  40.439   4
   9   3   3 534.486  35.919   2
   9   3   3 494.155  34.207   1
   9   3   3 488.999  49.798   5
 -10  -3  -3 152.993  23.905   1
 -10  -3  -3 195.189  17.426   1
  10   3   3 176.149  14.961   4
  10   3   3 186.357  15.805   2
  10   3   3 180.725  14.557   1
  10   3   3 175.265  19.678   5
 -11  -3  -3 420.310  37.572   1
  10  -4  -3 21.8887 10.9835   1
 -10   4   3 7.82459 7.87610   1
   9  -4  -3 -1.0046  6.3892   1
  -9   4   3 3.18614 6.49078   1
   8  -4  -3  9.0034 10.1774   1
  -8   4   3 6.74939 8.24144   1
  -8   4   3 -2.2867  6.4785   1
   7  -4  -3 19.3419  8.5305   1
   7  -4  -3 33.1212  8.6069   1
  -7   4   3 19.3166  7.0212   1
  -7   4   3 33.2655 10.7348   1
   6  -4  -3 176.583  19.035   1
   6  -4  -3 211.916  18.682   1
  -6   4   3 177.985  20.247   1
  -6   4   3 217.586  15.292   1
   5  -4  -3 53.5752 10.9791   1
   5  -4  -3 63.8649 10.1346   1
  -5   4   3 56.9190  4.2729   2
  -5   4   3 57.9794 10.8906   1
  -5   4   3 63.1481 10.7448   1
   4  -4  -3 134.008   7.272   1
   4  -4  -3 144.219   8.321   4
   4  -4  -3 147.531  16.266   1
  -4   4   3 133.908   5.694   2
  -4   4   3 137.366   9.500   1
  -4   4   3 132.283   9.796   1
   3  -4  -3 2024.86   57.63   4
   3  -4  -3 1985.12   88.82   1
   3  -4  -3 2198.43  130.73   1
  -3   4   3 2016.03   94.03   4
  -3   4   3 1899.53  110.51   1
  -3   4   3 1907.91  105.52   1
   2  -4  -3 116.416  11.473   1
   2  -4  -3 115.035   7.920   4
   2  -4  -3 116.274   7.081   1
  -2   4   3 109.143   8.159   1
  -2   4   3 129.648  10.607   1
  -2   4   3 107.385   6.589   4
  -2   4   3 106.253   5.779   5
   1  -4  -3 4613.06  189.57   1
   1  -4  -3 4469.56  177.18   4
   1  -4  -3 4215.20  131.76   1
  -1   4   3 4550.23  172.36   5
  -1   4   3 4408.54  146.57   1
  -1   4   3 4381.66  144.44   1
  -1   4   3 4300.42  156.66   4
   0  -4  -3 1105.41   47.18   4
   0  -4  -3 1076.26   63.33   1
   0  -4  -3 1145.91   59.31   3
   0  -4  -3 1107.13   36.20   1
   0   4   3 1104.57   64.83   5
   0   4   3 1094.78   47.71   4
   0   4   3 1090.70   41.21   1
   0   4   3 1101.68   51.21   1
  -1  -4  -3 2.43114 1.80955   7
  -1  -4  -3 -0.2286  2.3610   3
  -1  -4  -3 1.15298 1.27261   1
  -1  -4  -3 0.29342 1.96144   1
  -1  -4  -3 -2.2603  2.4046   4
   1   4   3 2.74022 2.20016   5
   1   4   3 0.29223 3.34114   4
   1   4   3 -0.7553  1.8803   3
   1   4   3 2.29069 1.84349   1
   1   4   3 0.96535 1.89704   1
  -2  -4  -3 65.0890  6.2010   7
  -2  -4  -3 64.6157  5.0696   1
   2   4   3 56.4820  6.7352   7
   2   4   3 70.2301  5.0734   1
   2   4   3 70.1884  3.7621   1
   2   4   3 77.1345  6.2613   5
   2   4   3 75.2921  6.4421   3
   2   4   3 53.7315  5.9003   4
   3   4   3 54.7515  6.4129   7
   3   4   3 61.9808  7.5678   5
   3   4   3 35.0580  5.2395   3
   3   4   3 53.3131  4.8620   4
   4   4   3 293.348  25.146   6
   4   4   3 282.097  16.787   4
   4   4   3 266.511  11.716   5
   4   4   3 303.464  15.186   7
   5   4   3 46.7520  7.5768   5
   5   4   3 40.4261  7.3093   7
   5   4   3 46.1398  7.4417   2
   5   4   3 59.4275  6.9604   4
   5   4   3 48.2409  5.4120   6
  -6  -4  -3 -0.4185  0.7763   1
  -6  -4  -3 -0.5845  0.6325   1
   6   4   3 5.57822 3.83315   6
   6   4   3 -0.4157  0.6139   1
   6   4   3 0.71709 0.71767   1
   6   4   3 -2.8063  4.2894   5
   6   4   3 1.19355 3.49192   4
   6   4   3 -1.2669  3.6265   2
  -7  -4  -3 512.136  29.357   1
  -7  -4  -3 463.347  24.823   1
   7   4   3 513.556  25.795   6
   7   4   3 498.563  48.928   2
   7   4   3 488.695  33.401   1
   7   4   3 493.895  37.846   5
   7   4   3 477.528  32.243   1
   7   4   3 468.475  32.457   4
  -8  -4  -3 1453.57   64.67   1
  -8  -4  -3 1324.21   78.79   1
   8   4   3 1311.70   69.83   4
   8   4   3 1357.71  127.01   5
   8   4   3 1270.60  103.95   1
   8   4   3 1429.23   85.35   2
   8   4   3 1468.14  134.20   1
  -9  -4  -3 256.765  28.319   1
  -9  -4  -3 184.588  16.414   1
   9   4   3 263.276  33.064   2
   9   4   3 255.901  17.096   1
   9   4   3 218.158  19.361   1
   9   4   3 270.987  28.587   4
   9   4   3 235.047  25.414   5
 -10  -4  -3 20.1852  4.1501   1
  10   4   3 19.9000  7.5919   2
 -11  -4  -3 13.8083  4.5531   1
  11   4   3 18.6339  8.4874   2
  10  -5  -3 0.61892 7.58062   1
   9  -5  -3 20.4118  9.0033   1
  -9   5   3 22.9425 10.3780   1
   8  -5  -3 -5.2082  6.3517   1
  -8   5   3 19.2132  8.2257   1
   7  -5  -3 402.880  65.387   1
   7  -5  -3 422.874  33.996   1
  -7   5   3 423.253  31.076   1
  -7   5   3 390.838  33.223   1
   6  -5  -3 851.390  68.075   4
   6  -5  -3 779.331  70.392   1
   6  -5  -3 784.374  45.406   1
  -6   5   3 797.809  66.732   1
  -6   5   3 774.203  49.224   2
  -6   5   3 803.312  54.382   1
   5  -5  -3 787.294  41.244   1
   5  -5  -3 827.878  68.093   1
   5  -5  -3 811.293  52.375   4
  -5   5   3 784.150  37.349   2
  -5   5   3 746.095  42.778   1
  -5   5   3 847.314  52.483   1
   4  -5  -3 65.1081  7.8632   1
   4  -5  -3 72.3253  6.8750   1
   4  -5  -3 55.7366  5.5708   4
  -4   5   3 72.6060  8.2223   1
  -4   5   3 61.3928  8.7596   1
   3  -5  -3 31.5723  6.0736   1
   3  -5  -3 32.8982  5.4509   1
   3  -5  -3 36.8526  5.2695   4
  -3   5   3 42.2249  6.8142   1
  -3   5   3 30.7340  4.2277   4
  -3   5   3 43.3670  4.2220   5
  -3   5   3 37.5482  5.6723   1
   2  -5  -3 90.8732  8.1957   4
   2  -5  -3 73.9395  9.1250   1
   2  -5  -3 107.898   9.012   1
  -2   5   3 79.8361  7.4109   4
  -2   5   3 77.6118  8.3244   1
  -2   5   3 100.862   9.782   1
  -2   5   3 91.8400  5.7615   5
   1  -5  -3 118.994   8.414   4
   1  -5  -3 116.032   7.178   3
   1  -5  -3 107.532   7.169   1
   1  -5  -3 110.044   6.114   1
  -1   5   3 123.200   8.517   1
  -1   5   3 114.516   7.213   5
  -1   5   3 123.334   9.028   4
  -1   5   3 112.378   9.967   1
   0  -5  -3 663.813  23.019   4
   0  -5  -3 696.632  23.973   3
   0  -5  -3 675.403  30.617   1
   0  -5  -3 655.322  20.798   1
   0   5   3 650.703  24.651   1
   0   5   3 629.058  20.832   5
   0   5   3 669.823  29.521   4
   0   5   3 648.051  34.565   1
  -1  -5  -3 393.093  16.246   4
  -1  -5  -3 395.908  22.266   1
  -1  -5  -3 430.766  24.101   7
  -1  -5  -3 371.811  13.772   1
   1   5   3 391.806  18.479   3
   1   5   3 424.935  24.337   5
   1   5   3 404.765  18.478   1
   1   5   3 417.521  18.577   4
   1   5   3 391.333  21.242   1
  -2  -5  -3 8408.19  468.36   7
  -2  -5  -3 8832.99  394.24   1
  -2  -5  -3 8322.49  403.77   1
  -2  -5  -3 8228.32  283.06   4
   2   5   3 8763.59  445.03   1
   2   5   3 8660.00  443.96   4
   2   5   3 8749.13  392.78   5
   2   5   3 8812.10  311.67   1
   2   5   3 8519.51  321.72   7
   2   5   3 8453.65  258.48   3
  -3  -5  -3 106.059   7.684   1
  -3  -5  -3 119.458   5.516   1
   3   5   3 122.820   7.351   1
   3   5   3 102.002   6.871   4
   3   5   3 132.442   9.758   7
   3   5   3 110.269   5.924   1
   3   5   3 110.614   7.157   3
   3   5   3 89.2978 12.8378   5
   4   5   3 3.55297 3.10277   7
   4   5   3 9.45283 4.72558   5
   4   5   3 5.46026 3.82193   4
   4   5   3 4.35533 3.69761   6
   5   5   3 260.935  18.195   5
   5   5   3 311.854  26.622   6
   5   5   3 267.705  21.023   7
   5   5   3 248.683  16.186   4
   6   5   3 207.032  13.795   4
   6   5   3 187.081  13.833   6
   6   5   3 137.907  18.599   7
   6   5   3 191.163  17.687   2
   6   5   3 175.690  13.885   5
  -7  -5  -3 1344.02  114.64   1
  -7  -5  -3 1716.86   92.57   1
   7   5   3 1408.20  106.39   1
   7   5   3 1574.30  160.27   5
   7   5   3 1623.46  167.98   7
   7   5   3 1581.66   87.43   6
   7   5   3 1654.90  152.03   2
   7   5   3 1744.85  109.03   1
   7   5   3 1574.00  102.56   4
  -8  -5  -3 260.072  30.172   1
  -8  -5  -3 307.956  40.135   1
   8   5   3 266.247  28.930   4
   8   5   3 275.032  26.936   2
   8   5   3 296.167  25.477   1
   8   5   3 292.663  28.602   5
   8   5   3 258.945  26.164   1
  -9  -5  -3 1.17263 1.63180   1
  -9  -5  -3 1.12767 1.81249   1
   9   5   3 -16.522   7.511   5
   9   5   3 -5.2110  5.9196   2
   9   5   3 -2.0597  1.5834   1
   9   5   3 2.26527 4.46313   4
  10   5   3 18.5660 10.0338   2
   9  -6  -3 174.810  22.437   1
  -9   6   3 168.868  28.895   1
   8  -6  -3 20.0987  8.0529   1
  -8   6   3 47.6450 10.5679   1
   7  -6  -3 8.36030 6.65756   1
   7  -6  -3 -0.7101  4.9539   4
  -7   6   3  5.1327 11.0782   1
  -7   6   3 10.2482  5.1298   2
  -7   6   3 4.99348 5.92978   1
   6  -6  -3 554.238  41.137   1
   6  -6  -3 574.981  50.743   4
   6  -6  -3 557.234  40.817   1
  -6   6   3 484.537  29.717   1
  -6   6   3 514.006  37.618   1
  -6   6   3 518.435  30.844   2
   5  -6  -3 303.691  18.021   1
   5  -6  -3 306.176  32.939   1
   5  -6  -3 322.831  26.238   4
  -5   6   3 274.513  21.119   1
  -5   6   3 283.030  32.499   1
   4  -6  -3 107.827  12.945   1
   4  -6  -3 82.8919 11.9872   4
   4  -6  -3 84.1890 10.0517   1
  -4   6   3 99.5907 11.4698   1
  -4   6   3 83.2982  8.9580   1
  -4   6   3 90.9501  7.6849   5
   3  -6  -3 33.3322  6.7367   1
   3  -6  -3 22.6460  7.2852   1
   3  -6  -3 19.2307  4.4059   4
   3  -6  -3 30.5290  4.1928   3
  -3   6   3 38.6707  6.8383   1
  -3   6   3 34.2375  4.3080   5
  -3   6   3 31.2926  5.9633   1
   2  -6  -3 175.705  16.462   1
   2  -6  -3 203.477  12.609   4
   2  -6  -3 173.923  10.876   1
   2  -6  -3 190.700  13.713   3
  -2   6   3 191.242  11.621   5
  -2   6   3 202.732  13.387   1
  -2   6   3 209.439  13.688   1
  -2   6   3 230.726  15.280   4
   1  -6  -3 44.1728  5.5120   4
   1  -6  -3 48.3590  5.4661   1
   1  -6  -3 39.7989  3.9825   3
   1  -6  -3 44.9040  7.6200   1
  -1   6   3 44.2851  6.9597   4
  -1   6   3 34.7448  5.8854   1
  -1   6   3 41.2789  5.3002   1
  -1   6   3 40.7492  6.5006   5
   0  -6  -3 274.483  12.072   1
   0  -6  -3 259.068  13.393   4
   0  -6  -3 248.037  14.160   1
   0  -6  -3 239.789  14.923   7
   0   6   3 267.256  14.426   1
   0   6   3 261.907  15.399   4
   0   6   3 237.861  17.043   1
   0   6   3 273.115  12.310   5
  -1  -6  -3 7.10189 2.83790   1
  -1  -6  -3 2.91828 3.77169   7
  -1  -6  -3 4.28240 3.23937   1
  -1  -6  -3 0.92315 3.62418   4
   1   6   3 -2.1416  2.8746   4
   1   6   3 2.36231 3.63489   5
   1   6   3 0.60694 2.84643   1
   1   6   3 0.55128 2.80712   1
   1   6   3 7.77446 3.98496   3
  -2  -6  -3 49.9127  5.4434   7
  -2  -6  -3 43.1840  3.3365   1
  -2  -6  -3 41.5144  3.6514   1
  -2  -6  -3 41.0180  6.6193   4
   2   6   3 44.4983  8.1289   4
   2   6   3 49.8881  4.8342   1
   2   6   3 32.4959  7.1195   5
   2   6   3 45.9722  5.1612   1
   2   6   3 44.4910  6.1350   3
  -3  -6  -3 76.4544  7.2556   4
  -3  -6  -3 64.4371  7.4800   1
   3   6   3 62.5003  6.2030   3
   3   6   3 61.3679  3.9272   1
   3   6   3 68.9342  4.1776   1
   3   6   3 60.8842  6.6700   4
   3   6   3 69.6497  9.6636   7
   3   6   3 47.9096  8.3605   5
  -4  -6  -3 173.705  10.251   1
  -4  -6  -3 168.068  10.296   1
   4   6   3 164.466   8.658   1
   4   6   3 156.515  20.106   7
   4   6   3 136.706  11.471   4
   4   6   3 148.732  12.201   6
   4   6   3 149.952  16.836   5
   4   6   3 175.189  10.668   1
  -5  -6  -3 8.10556 0.95171   1
  -5  -6  -3 5.55051 0.66761   1
   5   6   3 7.74469 4.14978   4
   5   6   3 5.43998 4.50831   6
   5   6   3 5.75003 0.60042   1
   5   6   3 14.8930  5.0193   7
   5   6   3 7.90581 4.98967   5
   5   6   3 8.16498 0.93331   1
   6   6   3 49.3327  7.4694   4
   6   6   3 52.2092 11.4235   5
   6   6   3 29.9951  6.0804   6
   6   6   3 60.9090 10.3544   7
   7   6   3 469.415  70.190   7
   7   6   3 515.534  33.623   6
   7   6   3 495.543  39.580   2
   7   6   3 429.318  27.796   4
   7   6   3 441.315  37.602   5
   8   6   3 31.5477  8.8328   2
   8   6   3 36.3810  5.6322   4
   8   6   3 39.1285  8.5523   6
   9   6   3 170.233  18.496   2
  10   6   3 42.0979 10.7836   2
   9  -7  -3 17.2417 10.3382   1
  -9   7   3 -0.4079 10.3193   1
   8  -7  -3 4.86278 8.62230   1
  -8   7   3  4.0940 10.1088   1
   7  -7  -3 245.983  22.431   4
   7  -7  -3 293.847  23.526   1
  -7   7   3 237.973  19.597   1
  -7   7   3 252.236  18.532   2
   6  -7  -3 19.4856  7.6143   1
   6  -7  -3 29.3814  7.7859   4
   6  -7  -3 28.2615  9.7478   1
  -6   7   3 19.2192  7.7898   1
   5  -7  -3 -4.8012  5.7459   1
   5  -7  -3 12.3262  4.7201   4
   5  -7  -3 17.2173  6.5704   1
  -5   7   3 6.94353 5.83100   1
  -5   7   3 -0.2933  7.4728   1
  -5   7   3 8.01681 2.52053   5
   4  -7  -3 63.8826  9.5396   1
   4  -7  -3 75.8970  9.2902   1
   4  -7  -3 56.1261  8.1551   4
   4  -7  -3 59.5336  4.9924   3
  -4   7   3 43.4550  5.4785   5
  -4   7   3 50.9684  8.0171   1
  -4   7   3 76.2202 10.0020   1
   3  -7  -3 9.63137 5.15991   1
   3  -7  -3 -1.7335  4.7888   1
   3  -7  -3 0.64235 1.99046   3
   3  -7  -3 8.86723 4.39353   4
  -3   7   3 -0.0732  3.9401   1
  -3   7   3 6.92593 4.55532   1
  -3   7   3 1.67481 2.17539   5
   2  -7  -3 378.963  29.385   1
   2  -7  -3 391.275  27.435   1
   2  -7  -3 391.015  28.532   4
  -2   7   3 398.945  26.095   1
  -2   7   3 430.224  31.688   5
  -2   7   3 345.670  27.411   1
   1  -7  -3 893.044  53.129   1
   1  -7  -3 807.918  54.483   4
   1  -7  -3 758.417  26.492   1
  -1   7   3 790.360  45.515   4
  -1   7   3 770.678  61.938   1
  -1   7   3 908.508  59.321   1
   0  -7  -3 31.8059  6.2127   4
   0  -7  -3 25.9420  5.2302   7
   0  -7  -3 28.6657  4.7249   1
   0  -7  -3 29.9560  6.3559   1
   0   7   3 31.9357  5.4700   1
   0   7   3 21.0632  5.1961   4
   0   7   3 38.3154  6.2095   1
  -1  -7  -3 279.768  21.156   4
  -1  -7  -3 303.520  19.373   1
  -1  -7  -3 277.178  18.904   7
  -1  -7  -3 286.600  21.688   1
   1   7   3 309.647  17.203   1
   1   7   3 297.954  20.609   3
   1   7   3 267.129  15.344   1
   1   7   3 291.066  16.836   4
  -2  -7  -3 134.320  14.018   4
  -2  -7  -3 93.0738  9.6661   7
  -2  -7  -3 124.487   7.031   1
  -2  -7  -3 107.504   8.017   1
   2   7   3 134.016  12.454   1
   2   7   3 106.654   9.403   1
   2   7   3 147.304  10.130   3
   2   7   3 107.855  11.057   4
  -3  -7  -3 449.996  41.533   1
  -3  -7  -3 395.442  27.939   4
  -3  -7  -3 487.093  22.184   1
   3   7   3 491.586  25.240   1
   3   7   3 472.063  32.454   3
   3   7   3 476.390  35.537   4
   3   7   3 434.555  21.984   1
  -4  -7  -3 31.8888  3.5136   1
  -4  -7  -3 30.5805  3.1469   1
   4   7   3 27.1978  7.5712   7
   4   7   3 28.8170  5.0872   4
   4   7   3 35.7424  3.2906   1
   4   7   3 35.3868  3.6623   1
   4   7   3 31.6888  6.9430   3
   4   7   3 38.8661  8.1910   6
   4   7   3 28.0744  7.6293   5
  -5  -7  -3 204.359  15.358   1
  -5  -7  -3 187.727  27.386   1
   5   7   3 174.010  25.008   7
   5   7   3 207.978  18.239   1
   5   7   3 188.060  19.848   6
   5   7   3 209.397  18.924   5
   5   7   3 166.160  16.671   4
   5   7   3 226.033  17.712   1
   6   7   3 66.5397 12.0024   5
   6   7   3 90.2247  9.0197   4
   6   7   3 67.2275 10.9445   6
   7   7   3 115.601  15.229   2
   7   7   3 103.424  12.399   6
   8   7   3 27.1896 10.1472   2
   8   7   3 18.6880  7.8831   6
   9   7   3 -3.2942  8.6088   2
   8  -8  -3 31.8681 11.1729   1
  -8   8   3 27.0922  9.2654   1
   7  -8  -3 311.389  29.224   1
  -7   8   3 366.148  33.829   1
   6  -8  -3 -4.9684  5.6217   4
   6  -8  -3 4.95289 6.54750   1
   6  -8  -3 0.73816 2.68747   3
  -6   8   3 -0.8270  1.4905   5
  -6   8   3 -4.9065  5.4443   1
   5  -8  -3 84.7827 11.0017   1
   5  -8  -3 88.0904 13.1429   1
   5  -8  -3 109.232  11.195   3
   5  -8  -3 79.9905 10.6685   4
  -5   8   3 89.1619 14.0317   1
  -5   8   3 86.9935  9.3776   5
   4  -8  -3 298.905  33.373   4
   4  -8  -3 381.180  33.444   1
   4  -8  -3 396.024  34.935   1
  -4   8   3 340.974  28.658   1
  -4   8   3 353.574  31.260   1
  -4   8   3 375.509  30.794   5
   3  -8  -3 1210.27  105.27   1
   3  -8  -3 1209.51   75.19   1
   3  -8  -3 1124.57  106.95   4
  -3   8   3 1210.03   93.33   1
  -3   8   3 1246.06   77.32   5
  -3   8   3 1185.64   76.83   1
   2  -8  -3 3565.12  224.59   1
   2  -8  -3 3567.66  326.63   4
   2  -8  -3 3661.58  297.53   1
  -2   8   3 3876.18  272.63   5
  -2   8   3 3666.33  212.53   1
  -2   8   3 3697.02  332.29   1
   1  -8  -3 -0.5455  4.0362   7
   1  -8  -3 0.07408 3.23111   1
   1  -8  -3 4.07400 4.89526   4
   1  -8  -3 1.62234 3.90110   1
  -1   8   3 13.2011  4.4909   1
  -1   8   3 5.79544 3.92070   1
   0  -8  -3 391.873  33.702   1
   0  -8  -3 343.158  44.248   4
   0  -8  -3 418.085  32.621   1
   0  -8  -3 417.761  27.787   7
   0   8   3 459.536  30.074   1
   0   8   3 419.742  44.904   1
  -1  -8  -3 45.2658  7.8664   7
  -1  -8  -3 37.6962  5.1985   1
  -1  -8  -3 39.8939  8.4159   4
  -1  -8  -3 43.0146  7.2700   1
   1   8   3 44.8735  8.1036   3
   1   8   3 60.6509  8.1551   1
   1   8   3 53.8567  7.5709   1
  -2  -8  -3 725.719  65.016   1
  -2  -8  -3 844.181 100.113   4
  -2  -8  -3 805.548  53.748   1
  -2  -8  -3 843.172  53.501   7
   2   8   3 813.102  52.785   3
   2   8   3 875.323  54.484   1
   2   8   3 830.516  67.783   1
  -3  -8  -3 30.1671  3.7275   1
  -3  -8  -3 29.6438  4.2771   1
  -3  -8  -3 34.5504  6.4574   4
   3   8   3 29.1363  4.6788   1
   3   8   3 39.8223  7.5917   3
   3   8   3 24.2851  4.6861   1
  -4  -8  -3 188.142  17.429   1
  -4  -8  -3 190.472  19.029   4
   4   8   3 229.254  18.486   6
   4   8   3 175.101  25.355   7
   4   8   3 195.811  20.976   3
   4   8   3 214.070  18.147   1
   4   8   3 202.979  11.797   1
   4   8   3 205.489  24.473   5
  -5  -8  -3 187.395  18.157   1
  -5  -8  -3 226.636  17.314   1
   5   8   3 173.252  15.163   1
   5   8   3 209.191  16.730   1
   5   8   3 227.009  25.991   6
  -6  -8  -3 200.144  13.874   1
  -6  -8  -3 263.093  21.952   1
   6   8   3 167.348  15.714   1
   6   8   3 262.918  27.472   6
   7   8   3 50.6407  9.6879   6
   8   8   3 85.8591 13.2968   6
   8   8   3 66.4715 14.5169   2
   7  -9  -3 21.0393  8.2423   1
  -7   9   3 53.2487 11.7137   1
   6  -9  -3 23.3046  8.3048   1
  -6   9   3 32.7778 11.6481   1
   5  -9  -3 -6.6472  5.9633   1
   5  -9  -3  3.5519 11.6917   1
  -5   9   3 8.77678 7.62391   1
  -5   9   3 -1.7104  5.1276   5
   4  -9  -3 41.9561  9.9521   1
   4  -9  -3 28.8377 10.5939   4
   4  -9  -3 28.4094  6.7412   1
  -4   9   3 55.6708  9.0042   5
  -4   9   3 32.0980  9.4559   1
   3  -9  -3 234.692  23.099   1
   3  -9  -3 279.596  18.890   1
   3  -9  -3 250.619  27.396   4
  -3   9   3 288.939  24.459   5
  -3   9   3 220.681  22.999   1
   2  -9  -3 201.906  20.104   1
   2  -9  -3 185.089  22.356   4
   2  -9  -3 210.862  27.235   7
   2  -9  -3 205.900  22.246   1
  -2   9   3 191.053  19.631   1
  -2   9   3 190.785  20.856   1
   1  -9  -3 81.7001 13.6633   4
   1  -9  -3 136.356  14.978   1
   1  -9  -3 139.792  15.199   1
   1  -9  -3 120.638  12.427   7
  -1   9   3 114.641  10.806   1
  -1   9   3 150.988  13.652   1
   0  -9  -3 170.986  15.780   7
   0  -9  -3 177.086  24.309   1
   0  -9  -3 191.169  17.274   1
   0  -9  -3 163.971  19.014   4
   0   9   3 142.674  19.449   1
   0   9   3 186.110  17.447   1
  -1  -9  -3 43.9469  9.6498   4
  -1  -9  -3 48.2523  8.9457   1
  -1  -9  -3 38.2555  6.1913   1
  -1  -9  -3 46.4386  7.6922   7
   1   9   3 47.6922  7.4727   3
   1   9   3 64.4281  9.1976   1
   1   9   3 61.8657  9.0845   1
  -2  -9  -3 193.197  21.518   1
  -2  -9  -3 224.191  20.107   1
  -2  -9  -3 215.254  24.210   7
  -2  -9  -3 180.183  26.010   4
   2   9   3 201.311  14.247   1
   2   9   3 185.098  18.812   3
   2   9   3 210.010  19.673   1
  -3  -9  -3 138.989  14.486   1
  -3  -9  -3 141.919  16.258   4
  -3  -9  -3 132.532  13.612   1
   3   9   3 142.914  17.734   6
   3   9   3 141.153  15.797   3
   3   9   3 159.125  15.364   1
   3   9   3 139.618  12.910   1
  -4  -9  -3 69.3217 14.0256   4
  -4  -9  -3 79.9879  9.5425   1
  -4  -9  -3 92.6602  9.1748   1
   4   9   3 58.5861  8.4517   1
   4   9   3 84.6534 13.0038   3
   4   9   3 93.3281 11.5172   6
   4   9   3 88.7110  9.4426   1
  -5  -9  -3 87.4588  8.0677   1
  -5  -9  -3 81.8855 12.5547   1
   5   9   3 91.1645 13.9025   6
   5   9   3 71.5553  6.7710   1
   5   9   3 93.7155 15.6599   3
  -6  -9  -3 28.7245  3.5450   1
   6   9   3 30.5998  9.1145   3
   6   9   3 15.9315 12.4272   6
   7   9   3 104.914  21.698   6
   6 -10  -3 2.43347 8.18117   1
  -6  10   3 7.12839 8.77460   1
   5 -10  -3 105.901  17.038   1
  -5  10   3 117.928  19.464   1
   4 -10  -3 71.4686 15.0069   1
   4 -10  -3 63.0613 12.4261   1
  -4  10   3 37.9915 10.3718   1
  -4  10   3 68.1614 11.1062   5
   3 -10  -3 65.7728 11.1899   1
   3 -10  -3 93.1148 16.1858   1
  -3  10   3 61.6696 13.2807   5
  -3  10   3 57.8642 13.7477   1
   2 -10  -3 48.9117  8.5798   1
   2 -10  -3 56.3620 10.1424   1
   2 -10  -3 65.7078  9.6937   7
  -2  10   3 78.8464 13.7110   1
   1 -10  -3 60.1478 11.1790   1
   1 -10  -3 97.7920 15.9423   1
   1 -10  -3 90.9081 11.9647   7
  -1  10   3 97.3572 12.3837   1
   0 -10  -3 25.2335  8.3233   7
   0 -10  -3 30.7565  8.2016   1
   0  10   3 24.7794  6.8188   1
  -1 -10  -3 38.6152  8.4661   7
  -1 -10  -3 33.4364  6.8718   1
  -1 -10  -3 53.9315  8.2407   1
   1  10   3 27.3352  6.1042   3
   1  10   3 26.3841  6.6712   1
  -2 -10  -3 268.220  20.877   1
  -2 -10  -3 259.467  32.255   1
  -2 -10  -3 243.056  35.796   7
   2  10   3 283.016  27.234   1
   2  10   3 257.582  25.893   1
   2  10   3 268.066  34.784   3
  -3 -10  -3 144.305  16.524   1
   3  10   3 121.803  13.611   1
   3  10   3 148.841  15.148   3
   3  10   3 160.007  21.178   6
  -4 -10  -3 47.1676  6.8535   1
   4  10   3 29.5959  5.0889   1
   4  10   3 48.1335 11.8676   3
   4  10   3 44.6102 11.1453   6
  -5 -10  -3 16.3254  4.2847   1
   5  10   3 5.17478 8.26631   3
   5  10   3 20.3991 12.8725   6
   6  10   3 3.55191 9.46651   3
   6  10   3 6.73693 9.74548   6
   5 -11  -3 77.5080 20.4727   1
  -5  11   3 53.5772 12.3831   1
   4 -11  -3 19.5318  8.9672   1
  -4  11   3 0.42765 9.87220   1
   3 -11  -3 47.8031 10.8617   7
   3 -11  -3 39.2528 12.7236   1
   3 -11  -3 24.3473 26.1511   1
  -3  11   3 68.6024 13.5608   1
   2 -11  -3 9.51756 9.61376   1
   2 -11  -3 2.13625 6.36493   7
  -2  11   3 22.8432 10.6860   1
   1 -11  -3 6.52382 8.52798   7
  -1  11   3 7.22760 7.71552   1
   0 -11  -3 3.99052 6.68780   1
   0 -11  -3 4.33652 5.87468   7
  -1 -11  -3 112.284  11.929   1
  -1 -11  -3 132.242  20.635   7
   1  11   3 93.7670 11.2158   3
  -2 -11  -3 26.6736  9.3136   7
  -2 -11  -3 39.2332  7.6277   1
   2  11   3 20.9987  6.5026   3
  -3 -11  -3 30.7080  8.6242   1
   3  11   3 57.2740 11.6278   6
   3  11   3 49.7289 10.5345   3
  -4 -11  -3 22.1483  4.9811   1
   4  11   3 30.0749  9.8830   3
   4  11   3 12.1917 12.0063   6
   2 -12  -3 82.8907 16.6160   7
   1 -12  -3 107.110  17.725   1
   1 -12  -3 73.0420 18.3194   7
   0 -12  -3 11.2547  5.5587   1
   0 -12  -3 4.28703 7.07550   7
  -1   9  -4 18.6648  8.4645   1
  -1   9  -4 13.1933 12.4880   6
   1  -9   4 12.7556  6.9604   1
  -2   9  -4 24.3631 10.1991   1
  -2   9  -4 32.7140  8.1165   6
   2  -9   4 13.2283  7.9998   1
   2  -9   4 25.3243 10.1297   7
  -3   9  -4 170.158  21.714   1
  -3   9  -4 151.262  19.268   6
   3  -9   4 186.655  29.406   7
   3  -9   4 168.928  25.379   1
  -4   9  -4 65.9388 17.3170   1
   4  -9   4 96.3361 15.3433   7
   4  -9   4 75.9440 15.8025   1
   5  -9   4 -4.5798  6.5694   7
   5  -9   4  1.2603 13.0618   1
   2   8  -4 5.55625 7.48895   6
  -2  -8   4 -1.8463  6.6612   1
   1   8  -4 3.81205 7.29740   6
   1   8  -4 1.78059 6.87606   1
  -1  -8   4 10.6660  7.8876   1
   0   8  -4 9.13280 8.18913   6
   0   8  -4 8.06871 7.36000   1
   0  -8   4 12.5010  7.0574   1
  -1   8  -4 5.56775 5.45337   6
  -1   8  -4 4.59427 8.35047   1
   1  -8   4 12.6145  6.1540   7
   1  -8   4 16.6493  8.6202   1
   1  -8   4 9.05737 6.02836   1
  -2   8  -4 -2.9400  7.3921   1
  -2   8  -4 0.88712 5.54990   6
   2  -8   4 -0.7505  5.6020   1
   2  -8   4 6.84379 5.55795   7
  -3   8  -4 17.2527  6.6208   6
  -3   8  -4 -0.6243 10.9983   1
   3  -8   4 -1.3855  5.2788   1
   3  -8   4 8.60832 5.24723   7
  -4   8  -4 4.92068 7.61596   1
   4  -8   4 17.3106  8.8413   1
   4  -8   4 1.79269 4.71865   7
  -5   8  -4 9.30639 6.80197   1
   5  -8   4 1.13638 8.26358   1
   5  -8   4 7.06673 7.43575   7
  -6   8  -4 32.7872 13.0215   1
   6  -8   4 33.7271 13.8094   1
  -7   8  -4 90.4055 17.5063   1
   7  -8   4 54.1647 15.6555   1
  -4  -7   4 9.17676 7.38843   1
   3   7  -4 8.74527 9.35724   1
   3   7  -4 3.58735 7.06399   6
  -3  -7   4 -4.4485  7.9928   1
   2   7  -4 196.561  19.869   6
   2   7  -4 191.373  20.853   1
  -2  -7   4 212.977  28.012   1
  -2  -7   4 203.899  25.060   1
   1   7  -4 133.907  15.850   1
   1   7  -4 123.502  14.938   6
  -1  -7   4 162.195  23.928   1
  -1  -7   4 153.929  17.064   1
   0   7  -4 7.68770 6.25433   6
   0   7  -4 5.01374 6.73346   1
   0  -7   4 2.75350 4.87135   1
   0  -7   4 -8.6119  7.6646   1
  -1   7  -4 20.3855  6.9179   1
  -1   7  -4 14.8313  5.8216   6
   1  -7   4 17.3319 28.8258   1
   1  -7   4 28.3397  8.9642   1
   1  -7   4 16.1761  6.4372   7
  -2   7  -4 812.108  65.984   1
  -2   7  -4 839.957  72.572   6
   2  -7   4 745.712  75.533   1
   2  -7   4 838.505  85.857   7
   2  -7   4 750.545  86.429   1
  -3   7  -4 61.6102 10.4426   1
   3  -7   4 72.3055 14.1426   1
   3  -7   4 85.7262 11.7305   1
   3  -7   4 83.3445 10.3032   7
  -4   7  -4 16.6261  7.6840   1
   4  -7   4 -1.3114  9.1756   1
   4  -7   4 24.4543  7.9525   1
   4  -7   4 21.1265  6.1867   7
  -5   7  -4 52.0056 11.6468   1
   5  -7   4 55.9235 12.0909   1
  -6   7  -4 21.5635  9.4743   1
   6  -7   4 13.4389  6.4592   1
  -7   7  -4 -3.8403  7.3129   1
   7  -7   4 0.72510 7.01072   1
  -8   7  -4  8.0850 11.8692   1
   8  -7   4 -0.0369 11.5570   1
  -9   7  -4 11.2246 10.9446   1
   9  -7   4 2.75365 8.85441   1
  -5  -6   4 523.334  58.776   1
   4   6  -4 680.751  61.001   1
  -4  -6   4 633.139  54.937   1
  -4  -6   4 591.986  58.783   4
   3   6  -4 37.4705  8.9103   1
   3   6  -4 36.1344  6.7513   6
  -3  -6   4 53.0745 10.3186   1
  -3  -6   4 23.2484 11.2888   1
  -3  -6   4 58.5750  8.6828   4
   2   6  -4 230.879  24.705   6
   2   6  -4 279.445  21.811   1
  -2  -6   4 264.535  22.373   1
  -2  -6   4 233.329  24.850   1
  -2  -6   4 293.698  27.078   4
   1   6  -4 7.08417 6.46646   6
   1   6  -4 -1.6811  6.2160   1
  -1  -6   4 3.24338 6.95009   1
  -1  -6   4 5.38147 5.29050   1
  -1  -6   4 3.84207 5.70405   4
   0   6  -4 221.338  20.593   6
   0   6  -4 209.352  21.965   1
   0  -6   4 231.817  23.778   1
   0  -6   4 216.707  17.833   1
  -1   6  -4 8.96633 4.56861   6
  -1   6  -4 2.89155 5.44496   1
  -1   6  -4 16.2902  6.7134   1
   1  -6   4 8.46467 4.36695   7
   1  -6   4 15.2298  7.8067   1
   1  -6   4 16.3645  6.2557   1
  -2   6  -4 68.6227  9.0254   1
  -2   6  -4 62.2122  8.1526   1
  -2   6  -4 94.3913 11.4719   6
   2  -6   4 83.9431  8.3715   7
   2  -6   4 94.0230 10.6740   1
   2  -6   4 66.2576  8.9816   1
  -3   6  -4 118.073  13.621   1
  -3   6  -4 83.8855 13.3180   1
   3  -6   4 125.612  17.821   1
   3  -6   4 99.1615 13.6128   1
   3  -6   4 137.989  12.164   7
  -4   6  -4 19.6626  2.6686   3
  -4   6  -4 18.9711  6.8472   1
  -4   6  -4 24.0529 11.0439   1
   4  -6   4 21.6939 10.7033   1
  -5   6  -4 24.7687  9.5371   1
  -5   6  -4 43.5248  8.8946   1
   5  -6   4 42.0693 10.1383   1
  -6   6  -4 11.2600  5.4985   1
  -6   6  -4 -7.0507 10.1731   1
   6  -6   4 -0.4348  5.2986   1
  -7   6  -4 45.6221  9.2760   1
   7  -6   4 53.8584 11.2234   1
  -8   6  -4 27.1113  9.4347   1
   8  -6   4 19.8901  8.0959   1
  -9   6  -4 11.6931  9.6709   1
   9  -6   4 2.76553 7.38272   1
 -10   6  -4 26.5003  9.4362   1
  10  -6   4 6.86480 9.18472   1
  -6  -5   4 85.6114 15.4022   1
   5   5  -4 0.75138 5.18265   1
  -5  -5   4 0.81345 5.20373   1
   4   5  -4 65.5724 12.3528   1
   4   5  -4 102.300  17.121   7
  -4  -5   4 84.0663 11.6169   4
  -4  -5   4 64.0850 14.5233   1
  -4  -5   4 99.4726 16.9951   1
   3   5  -4 132.335  13.242   7
   3   5  -4 104.366  13.362   1
   3   5  -4 118.539  14.228   6
  -3  -5   4 114.936  13.553   4
  -3  -5   4 144.900  20.269   1
  -3  -5   4 106.701  12.235   1
   2   5  -4 221.632  22.500   1
   2   5  -4 219.576  16.537   6
   2   5  -4 203.506  18.410   7
   2   5  -4 156.515  17.497   1
  -2  -5   4 227.586  16.770   1
  -2  -5   4 220.986  26.575   4
  -2  -5   4 175.099  19.245   1
   1   5  -4 129.506  12.962   6
   1   5  -4 148.447  13.603   1
   1   5  -4 105.069  11.454   1
  -1  -5   4 152.160  16.218   1
  -1  -5   4 136.998  12.786   1
   0   5  -4 446.996  34.938   1
   0   5  -4 435.118  34.822   1
   0   5  -4 441.018  24.841   6
   0  -5   4 473.638  47.365   1
   0  -5   4 474.866  31.007   1
  -1   5  -4 248.411  27.293   6
  -1   5  -4 309.977  21.222   1
  -1   5  -4 208.342  20.459   1
   1  -5   4 253.847  21.134   1
   1  -5   4 247.048  25.185   7
   1  -5   4 237.559  22.562   1
  -2   5  -4 17.0101  8.4337   1
  -2   5  -4 29.7856  5.4175   1
  -2   5  -4 25.0302  4.7540   6
   2  -5   4 16.4267  6.0833   1
   2  -5   4 29.5984  5.9663   1
   2  -5   4 22.7426  5.7914   7
  -3   5  -4 39.5354  8.9712   1
  -3   5  -4 27.5787  7.6174   1
   3  -5   4 34.4115  6.0100   7
   3  -5   4 24.9931  7.1645   1
   3  -5   4 36.4838  8.6248   1
  -4   5  -4 305.780  23.684   1
  -4   5  -4 349.605  30.530   1
  -4   5  -4 324.845  24.387   3
   4  -5   4 343.497  26.038   1
   4  -5   4 304.117  27.761   1
  -5   5  -4 125.519  13.233   1
  -5   5  -4 107.649  12.454   1
   5  -5   4 114.807  12.678   1
   5  -5   4 104.425  12.542   1
  -6   5  -4 65.4909 11.2983   1
  -6   5  -4 57.1780 10.5011   1
   6  -5   4 60.3439  8.9177   1
   6  -5   4 84.4788 11.9503   1
  -7   5  -4 7.56066 6.83506   1
  -7   5  -4 5.06346 6.29041   1
   7  -5   4 7.12286 6.50388   1
  -8   5  -4 206.064  21.479   1
  -8   5  -4 203.133  21.598   1
   8  -5   4 201.185  25.581   1
  -9   5  -4 21.5081 32.0660   1
  -9   5  -4 15.3007  8.5157   1
   9  -5   4 20.0615 10.9717   1
 -10   5  -4 13.8487 10.6667   1
 -10   5  -4 2.48285 5.40961   5
  10  -5   4 10.4062 11.2317   1
  -7  -4   4 21.4377  9.0305   1
   6   4  -4 5.63740 6.52983   1
  -6  -4   4 1.87684 4.98060   1
   5   4  -4 38.9656  9.0540   1
   5   4  -4 22.8077  8.5140   7
  -5  -4   4 23.0387  4.8102   4
  -5  -4   4 11.0216  6.9095   1
  -5  -4   4 9.80955 6.95179   1
   4   4  -4 3.09113 7.80602   7
   4   4  -4 12.0875  5.7774   1
  -4  -4   4 4.25290 5.14425   4
  -4  -4   4 -0.7297  5.6743   1
  -4  -4   4 1.30697 3.58551   1
   3   4  -4 90.1683 11.2077   1
   3   4  -4 118.259  12.612   7
   3   4  -4 93.8598 12.6424   1
  -3  -4   4 107.345  11.659   4
  -3  -4   4 84.4482 10.8983   1
  -3  -4   4 92.6106 16.1290   1
   2   4  -4 47.6009  8.8497   1
   2   4  -4 65.8061  9.9429   7
   2   4  -4 46.4110  7.0994   1
   2   4  -4 57.8454 10.3021   6
  -2  -4   4 48.5452  8.7524   1
  -2  -4   4 62.4012  9.8996   1
   1   4  -4 1011.31   75.91   1
   1   4  -4 1032.46   42.24   6
   1   4  -4 959.414  70.547   1
  -1  -4   4 1094.82   95.43   1
  -1  -4   4 984.097  47.554   1
   0   4  -4 69.3358  8.5663   1
   0   4  -4 61.1926  7.6044   1
   0   4  -4 70.5013  7.8185   6
   0  -4   4 73.7316  8.7583   1
   0  -4   4 83.0842  9.5207   1
  -1   4  -4 9.03874 4.00784   1
  -1   4  -4 11.3559  5.3675   1
  -1   4  -4 8.47190 3.94616   6
   1  -4   4 9.37160 2.94016   7
   1  -4   4 3.89806 3.78182   1
   1  -4   4 14.2759  4.3764   1
  -2   4  -4 15.7763  3.8219   6
  -2   4  -4 24.6972  5.4358   1
  -2   4  -4 17.9375  5.1368   1
   2  -4   4 9.72252 3.85651   1
   2  -4   4 25.3275  6.0760   1
   2  -4   4 24.2911  4.1653   7
  -3   4  -4 4.18955 5.71989   1
  -3   4  -4 27.2635  6.1049   1
   3  -4   4 10.9456  6.1597   1
   3  -4   4 13.2004  5.5581   1
  -4   4  -4 1165.19  112.51   1
  -4   4  -4 1233.02   65.81   1
  -4   4  -4 1126.66   45.99   3
   4  -4   4 1172.23   73.39   1
   4  -4   4 1203.08   66.89   1
  -5   4  -4 100.488  12.029   1
  -5   4  -4 112.430  10.540   1
   5  -4   4 115.514  14.856   1
   5  -4   4 98.5100 11.9317   1
  -6   4  -4 1036.08   60.64   1
  -6   4  -4 1047.10  107.15   1
   6  -4   4 1057.35  104.13   1
   6  -4   4 1107.14   84.31   1
  -7   4  -4 818.944  52.349   1
  -7   4  -4 852.538  63.736   1
   7  -4   4 798.356  59.136   1
   7  -4   4 822.890  86.982   1
  -8   4  -4 15.9266  8.7747   1
  -8   4  -4 12.2716  7.1561   1
   8  -4   4 11.8200  8.0861   1
  -9   4  -4 -8.0539  5.3222   1
  -9   4  -4 3.37971 7.20353   1
  -9   4  -4 3.20570 3.07332   5
   9  -4   4 -4.5934  5.8199   1
 -10   4  -4 7.87635 6.46157   1
 -10   4  -4 12.1406  3.6156   5
 -10   4  -4 13.1786  9.8433   1
  10  -4   4 20.6526  9.3114   1
 -11   4  -4 30.9381 10.4247   1
  11  -4   4 27.8635 10.4224   1
   7   3  -4 7.10571 8.23799   1
  -7  -3   4 -4.1318  5.7372   1
   6   3  -4 8.22650 8.16187   1
   6   3  -4 17.8925  8.1650   7
  -6  -3   4 1.92856 2.20426   4
  -6  -3   4 4.99741 5.27919   1
  -6  -3   4 5.91802 5.73979   1
   5   3  -4 48.1840 10.6065   7
  -5  -3   4 58.1303  8.2139   4
  -5  -3   4 22.9087 11.4930   6
  -5  -3   4 51.8710  7.7841   1
  -5  -3   4 59.8348  7.7794   1
   4   3  -4 5.31736 6.39118   7
   4   3  -4 3.26353 5.16614   1
   4   3  -4 4.68834 4.69364   1
  -4  -3   4 6.15170 4.87883   6
  -4  -3   4 -2.3598  3.3109   4
  -4  -3   4 1.93109 4.82349   1
  -4  -3   4 4.28807 4.01306   1
   3   3  -4 9.93045 4.66021   1
   3   3  -4 21.3751  7.4289   1
   3   3  -4 12.0196  5.9248   7
  -3  -3   4 16.7757  5.7107   1
  -3  -3   4 9.55346 4.46803   6
  -3  -3   4 2.09704 4.98387   1
   2   3  -4 122.225  11.890   7
   2   3  -4 144.795  15.938   1
   2   3  -4 124.607  10.231   1
  -2  -3   4 125.510  12.678   1
  -2  -3   4 135.271   9.049   1
   1   3  -4 1498.20   77.71   7
   1   3  -4 1438.01  106.81   1
   1   3  -4 1366.80   53.01   1
   1   3  -4 1450.88   65.20   6
  -1  -3   4 1364.59   61.21   1
  -1  -3   4 1493.14   87.52   1
   0   3  -4 182.604  15.324   1
   0   3  -4 177.686  10.749   6
   0   3  -4 178.426  11.397   1
   0  -3   4 203.525  13.479   1
   0  -3   4 201.368  20.803   1
  -1   3  -4 556.193  33.698   6
  -1   3  -4 567.267  37.702   1
  -1   3  -4 528.895  31.346   1
   1  -3   4 601.745  26.630   1
   1  -3   4 558.822  40.479   1
   1  -3   4 545.142  36.831   7
  -2   3  -4 47.3158  7.0908   1
  -2   3  -4 52.5293  6.6301   1
  -2   3  -4 57.3492  5.1184   6
   2  -3   4 49.0787  4.0311   7
   2  -3   4 53.2939  6.9663   1
   2  -3   4 37.6980  5.6863   1
  -3   3  -4 15.1869  5.5756   1
  -3   3  -4 26.3635  4.8153   1
   3  -3   4 12.0520  4.9595   1
   3  -3   4 16.5072  4.1429   1
  -4   3  -4 2.98028 1.27605   3
  -4   3  -4 0.46771 3.74665   1
  -4   3  -4 0.99061 3.02546   1
   4  -3   4 -0.7813  3.6204   1
   4  -3   4 -1.3312  2.9197   1
  -5   3  -4 818.717  44.824   1
  -5   3  -4 873.879  42.364   1
   5  -3   4 881.254  42.995   1
   5  -3   4 829.207  41.158   1
  -6   3  -4 -1.0439  4.4405   1
  -6   3  -4 -1.2230  4.5103   1
   6  -3   4 1.35528 3.51390   1
   6  -3   4 5.51486 4.48607   1
  -7   3  -4 14.4503  6.5262   1
  -7   3  -4 12.3750  5.4170   1
   7  -3   4 9.59552 4.67205   1
   7  -3   4 20.8435  7.2909   1
  -8   3  -4 793.060  69.568   1
  -8   3  -4 819.955  66.592   5
  -8   3  -4 730.183  83.557   1
   8  -3   4 709.776  52.363   1
   8  -3   4 747.792  76.561   1
  -9   3  -4 637.238  51.821   5
  -9   3  -4 667.553  49.178   1
  -9   3  -4 651.460  44.595   1
  -9   3  -4 653.298  55.668   2
   9  -3   4 683.858  44.286   3
   9  -3   4 705.890  58.778   1
 -10   3  -4 171.414  18.425   1
 -10   3  -4 150.353  14.971   5
 -10   3  -4 160.273  16.658   1
  10  -3   4 180.768  19.044   1
  10  -3   4 175.287  20.036   3
 -11   3  -4 128.697  18.398   5
 -11   3  -4 186.508  21.878   1
  11  -3   4 123.213  19.488   1
  11  -3   4 124.274  16.838   3
   8   2  -4 28.8073 10.7086   2
  -8  -2   4 13.1689  7.4174   1
   7   2  -4 23.1488 10.2555   1
   7   2  -4 22.8661  6.8100   2
  -7  -2   4 29.8405  7.9360   1
  -7  -2   4 39.4167  8.4132   1
   6   2  -4 136.641  19.724   1
  -6  -2   4 171.541  22.207   1
  -6  -2   4 145.986  18.282   1
   5   2  -4 358.894  37.297   1
   5   2  -4 370.033  46.480   1
  -5  -2   4 422.849  48.793   1
  -5  -2   4 436.730  58.209   4
  -5  -2   4 414.148  36.258   1
  -5  -2   4 363.658  45.377   6
   4   2  -4 7.54629 5.65402   1
   4   2  -4 10.5217  4.2153   1
  -4  -2   4 6.24174 5.18064   6
  -4  -2   4 11.4132  2.6717   4
  -4  -2   4 7.14067 4.78108   1
  -4  -2   4 12.3541  5.1785   1
   3   2  -4 13.7847  6.5361   1
   3   2  -4 5.38634 4.26318   1
  -3  -2   4 36.2746  8.2661   1
  -3  -2   4 22.8400  5.2641   1
  -3  -2   4 12.3421  3.9521   6
   2   2  -4 134.413  10.889   1
   2   2  -4 140.129   9.444   7
   2   2  -4 124.278   8.568   1
  -2  -2   4 120.513  10.439   1
  -2  -2   4 126.177  12.189   6
  -2  -2   4 139.508  10.355   1
   1   2  -4 273.014  16.764   1
   1   2  -4 253.319  15.990   7
   1   2  -4 254.927  13.633   1
  -1  -2   4 242.003  22.731   6
  -1  -2   4 249.916  13.600   1
  -1  -2   4 269.475  20.229   1
   0   2  -4 3.73566 1.68990   7
   0   2  -4 -0.1573  2.8490   1
   0   2  -4 3.11878 3.59451   1
   0   2  -4 0.41983 3.00396   6
   0  -2   4 0.90142 2.85115   1
   0  -2   4 2.34619 2.79174   1
  -1   2  -4 5.44148 2.69596   6
  -1   2  -4 12.1178  4.8577   1
  -1   2  -4 9.23273 3.50128   1
   1  -2   4 8.54294 2.00108   7
   1  -2   4 4.81531 4.27204   1
   1  -2   4 10.6944  4.6971   1
  -2   2  -4 9.35577 1.82516   6
  -2   2  -4 6.77981 3.27489   1
  -2   2  -4 7.41919 4.55564   1
   2  -2   4 11.7353  3.9479   1
   2  -2   4 12.3737  2.8679   7
   2  -2   4 17.1776  4.6175   1
  -3   2  -4 60.3215  7.3368   1
  -3   2  -4 40.2421  5.1606   1
   3  -2   4 50.7360  6.1257   1
   3  -2   4 36.6952  6.2029   1
  -4   2  -4 185.811  10.617   1
  -4   2  -4 193.005  13.292   1
  -4   2  -4 180.993  11.048   3
   4  -2   4 182.183  10.804   1
   4  -2   4 157.829  11.036   1
  -5   2  -4 40.3370  4.3376   1
  -5   2  -4 42.4280  5.1644   1
   5  -2   4 36.7104  5.1614   1
  -6   2  -4 63.4446  6.4600   1
  -6   2  -4 59.0678  7.3268   1
   6  -2   4 54.6443  7.0379   1
   6  -2   4 40.7396  7.0363   1
  -7   2  -4 651.764  38.578   1
  -7   2  -4 659.114  46.927   5
  -7   2  -4 657.062  45.664   1
   7  -2   4 651.178  36.695   1
   7  -2   4 664.144  53.425   1
   7  -2   4 644.297  30.657   3
  -8   2  -4 1013.29   64.75   2
  -8   2  -4 877.128  50.409   1
  -8   2  -4 865.307  50.260   5
  -8   2  -4 880.499  64.627   1
   8  -2   4 888.448  62.038   1
   8  -2   4 797.242  80.424   1
   8  -2   4 903.253  60.130   3
  -9   2  -4 32.2609  6.6153   1
  -9   2  -4 40.3869  8.5995   1
  -9   2  -4 31.8912  8.0170   2
  -9   2  -4 46.6140  6.4955   5
   9  -2   4 37.4781  9.8402   1
   9  -2   4 39.1492  7.3004   3
 -10   2  -4 7.44869 5.44483   1
 -10   2  -4 3.20196 5.26849   6
 -10   2  -4 11.0183  3.3987   5
 -10   2  -4 13.7016  7.1559   1
  10  -2   4 6.11982 3.86160   3
  10  -2   4 7.58582 5.84134   1
 -11   2  -4 3.60914 5.13524   1
 -11   2  -4 4.96472 7.02633   6
  11  -2   4 12.3387  5.8578   1
  11  -2   4 22.3531  6.4597   3
 -12   2  -4 67.1418 16.7304   1
  12  -2   4 97.6431 12.7703   3
   8   1  -4 2.32199 9.17031   1
   8   1  -4 15.5663  6.8190   2
  -8  -1   4 9.52958 9.85138   1
   7   1  -4 141.042  20.524   2
   7   1  -4 190.730  22.583   1
  -7  -1   4 151.858  17.373   1
  -7  -1   4 155.559  14.890   1
   6   1  -4 3.67045 4.56284   1
  -6  -1   4 6.96203 5.51287   1
  -6  -1   4 16.0008  4.8097   1
  -6  -1   4 -7.3570  5.7219   6
   5   1  -4 655.181  67.333   1
   5   1  -4 658.237  42.780   1
  -5  -1   4 705.691  67.664   1
  -5  -1   4 679.807  73.854   1
  -5  -1   4 710.037  96.685   4
  -5  -1   4 633.796  67.414   6
   4   1  -4 10.2909  5.2071   1
  -4  -1   4 6.63425 4.66383   6
  -4  -1   4 4.93880 4.65074   1
  -4  -1   4 9.33343 4.96035   1
   3   1  -4 50.6422  5.4051   1
   3   1  -4 64.8472  7.5725   1
  -3  -1   4 61.0862  8.5794   1
  -3  -1   4 57.7105 10.3268   6
  -3  -1   4 43.0279  6.4614   1
   2   1  -4 7.70732 4.48589   1
   2   1  -4 11.6727  3.5425   1
  -2  -1   4 11.2642  3.6533   1
  -2  -1   4 6.98656 4.47621   6
  -2  -1   4 6.51969 3.30075   1
   1   1  -4 2.14270 1.52995   7
   1   1  -4 0.53368 4.41802   1
   1   1  -4 -2.6959  3.0191   1
  -1  -1   4 -0.9858  4.2222   1
  -1  -1   4 3.76439 2.24388   6
  -1  -1   4 5.17094 4.08995   1
   0   1  -4 1906.62   56.68   1
   0   1  -4 1970.28   74.12   7
   0   1  -4 1806.18   79.47   1
   0  -1   4 1895.08   76.50   6
   0  -1   4 1838.36   59.38   1
   0  -1   4 1941.13   79.28   1
  -1   1  -4 6.68626 4.71682   1
  -1   1  -4 10.7129  4.3385   1
   1  -1   4 11.2563  4.1352   1
   1  -1   4 20.0156  5.1023   1
  -2   1  -4 242.396  18.402   1
  -2   1  -4 249.351   9.265   1
  -2   1  -4 239.334  13.866   6
   2  -1   4 245.878  10.694   1
   2  -1   4 245.490  13.962   1
  -3   1  -4 2217.68   76.44   1
  -3   1  -4 2261.62  101.39   1
  -3   1  -4 2279.25  117.03   3
   3  -1   4 2221.16  100.35   1
   3  -1   4 2261.04   92.77   1
  -4   1  -4 280.834  16.537   1
  -4   1  -4 300.069  16.040   1
  -4   1  -4 295.346  17.032   3
   4  -1   4 291.589  16.333   1
   4  -1   4 279.934  14.333   1
  -5   1  -4 1926.28  105.50   1
  -5   1  -4 2015.51  109.17   1
   5  -1   4 1968.47   62.03   1
   5  -1   4 1985.06  123.31   1
  -6   1  -4 590.226  28.856   5
  -6   1  -4 636.489  24.249   1
  -6   1  -4 587.299  30.997   1
   6  -1   4 634.839  45.239   1
   6  -1   4 606.116  25.385   1
   6  -1   4 653.550  37.248   3
  -7   1  -4 66.2112  6.5483   5
  -7   1  -4 60.5116  8.4982   2
  -7   1  -4 65.7232  7.1128   1
  -7   1  -4 61.4939  6.3876   1
   7  -1   4 67.4348  7.7365   3
   7  -1   4 54.4208  7.5839   1
  -8   1  -4 142.858  13.190   5
  -8   1  -4 136.721  12.168   1
  -8   1  -4 146.458  16.707   2
  -8   1  -4 147.885  13.019   6
  -8   1  -4 139.988  12.090   1
   8  -1   4 153.209  14.283   1
   8  -1   4 142.294  13.922   3
   8  -1   4 134.905  13.532   1
  -9   1  -4 104.168  12.532   1
  -9   1  -4 103.470  14.110   1
  -9   1  -4 103.030  11.424   2
  -9   1  -4 103.858  12.087   5
  -9   1  -4 99.5135 12.2676   6
   9  -1   4 98.4727 10.7742   3
   9  -1   4 79.5190 12.3065   1
   9  -1   4 87.0922  9.9197   1
 -10   1  -4 -16.398  11.151   2
 -10   1  -4 2.81072 6.96148   6
 -10   1  -4 1.87967 5.03368   1
 -10   1  -4 0.50208 5.81593   1
 -10   1  -4 1.20157 3.01457   5
  10  -1   4 -2.1366  4.3629   1
  10  -1   4 0.49181 4.48929   3
 -11   1  -4 52.4030  8.7333   1
 -11   1  -4 44.7175 10.8168   6
  11  -1   4 57.3308 11.3366   3
 -12   1  -4 11.6631  9.2061   1
  12  -1   4 12.0561  7.5925   3
   9   0  -4  2.3089 11.9865   1
  -9   0   4  1.6945 10.6051   1
   8   0  -4 1.89928 3.27534   2
   8   0  -4 7.49601 6.98830   1
  -8   0   4 6.82511 6.89850   1
  -8   0   4 -0.9105  5.3235   1
   7   0  -4 24.3608  7.0782   1
   7   0  -4 20.3496  5.3599   2
  -7   0   4 35.7116 11.0362   1
  -7   0   4 45.4742  9.4595   1
   6   0  -4 32.6963  6.0831   2
   6   0  -4 26.3803  6.1762   1
   6   0  -4 30.9144  7.2818   1
  -6   0   4 37.3744  7.6518   1
  -6   0   4 34.1171  8.0996   1
  -6   0   4 28.3615  8.3121   6
   5   0  -4 123.244  12.675   1
   5   0  -4 87.1447 13.5128   1
  -5   0   4 113.891  12.108   6
  -5   0   4 106.301  17.449   1
  -5   0   4 108.621  10.195   1
   4   0  -4 20.1605  5.4834   1
   4   0  -4 31.1209  6.3121   1
  -4   0   4 24.6788 11.4762   1
  -4   0   4 31.4929  5.4580   1
  -4   0   4 17.1365  4.8428   6
   3   0  -4 39.9769  6.5639   1
  -3   0   4 25.9200  4.0610   1
  -3   0   4 30.9398  5.3372   1
   2   0  -4 740.965  38.143   1
   2   0  -4 685.252  33.681   1
  -2   0   4 665.194  37.300   6
  -2   0   4 701.259  28.690   1
  -2   0   4 774.151  36.681   1
   1   0  -4 620.338  35.124   1
   1   0  -4 630.465  22.307   1
  -1   0   4 609.446  17.468   1
  -1   0   4 644.294  37.064   1
  -1   0   4 636.379  35.070   6
   0   0  -4 2368.13   90.20   1
   0   0  -4 2289.10   73.07   1
   0   0   4 2339.06   91.28   6
   0   0   4 2275.77   70.87   1
   0   0   4 2329.07   90.37   1
  -1   0  -4 2862.44   90.03   1
  -1   0  -4 2714.40  122.61   1
   1   0   4 2913.63   84.56   1
   1   0   4 2759.07  129.60   1
   1   0   4 2807.29  117.72   6
  -2   0  -4 1377.03   84.53   1
  -2   0  -4 1459.17   48.31   1
   2   0   4 1416.17   69.50   1
   2   0   4 1479.54   73.09   1
  -3   0  -4 32.3813  3.7602   1
  -3   0  -4 32.0601  3.7415   1
   3   0   4 40.8168  4.9648   1
   3   0   4 44.1383  5.0575   1
  -4   0  -4 2613.35  141.49   3
  -4   0  -4 2709.88   76.70   1
  -4   0  -4 2568.81  151.84   1
  -4   0  -4 2798.50  121.22   6
   4   0   4 2654.87   95.69   1
   4   0   4 2718.45  154.30   1
  -5   0  -4 1384.87   59.13   6
  -5   0  -4 1255.95   63.37   5
  -5   0  -4 1371.93   63.42   1
  -5   0  -4 1267.12   77.58   1
  -5   0  -4 1261.03   60.40   2
   5   0   4 1266.00   57.45   3
   5   0   4 1335.19   58.47   1
   5   0   4 1282.31   88.84   1
  -6   0  -4 746.264  43.013   2
  -6   0  -4 742.421  37.757   6
  -6   0  -4 744.754  44.840   1
  -6   0  -4 752.589  47.328   5
  -6   0  -4 707.674  41.431   1
   6   0   4 715.492  41.909   3
   6   0   4 748.058  38.674   1
   6   0   4 716.311  56.840   1
  -7   0  -4 130.907   8.864   6
  -7   0  -4 111.817   7.957   1
  -7   0  -4 89.1548  5.9829   5
  -7   0  -4 85.0041  6.5612   1
  -7   0  -4 115.197  11.038   2
   7   0   4 125.769   9.192   1
   7   0   4 104.807   9.727   1
   7   0   4 97.2691 10.8765   3
  -8   0  -4 707.805  56.555   1
  -8   0  -4 681.441  59.541   6
  -8   0  -4 729.104  44.586   2
  -8   0  -4 671.398  71.710   5
  -8   0  -4 675.464  52.923   1
   8   0   4 648.231  48.984   1
   8   0   4 776.052  52.122   3
   8   0   4 644.073  36.506   1
  -9   0  -4 297.551  32.912   1
  -9   0  -4 275.546  20.304   5
  -9   0  -4 287.496  19.657   6
  -9   0  -4 265.629  23.433   2
  -9   0  -4 294.552  25.476   1
   9   0   4 321.523  34.751   1
   9   0   4 320.333  31.558   1
   9   0   4 334.633  25.951   3
 -10   0  -4 18.1521  7.3494   1
 -10   0  -4 4.32469 6.64322   2
 -10   0  -4 23.3154  7.5144   6
 -10   0  -4 17.1886  7.7334   1
  10   0   4 20.5895  8.1657   1
  10   0   4 17.5405  6.2317   3
  10   0   4 7.24075 7.57189   1
 -11   0  -4 350.136  39.386   1
 -11   0  -4 291.950  48.437   6
  11   0   4 272.628  29.395   3
 -12   0  -4 0.97445 5.93148   1
  12   0   4 -7.4854  8.5502   3
   9  -1  -4 177.413  17.220   1
  -9   1   4 150.216  22.058   1
   8  -1  -4 87.0125 14.6361   1
  -8   1   4 132.476  20.780   1
  -8   1   4 112.142  13.072   1
   7  -1  -4 7.16452 6.72379   1
  -7   1   4 -0.1828  5.5608   1
  -7   1   4 -5.6900  5.0043   1
   6  -1  -4 235.497  17.362   1
   6  -1  -4 211.486  22.111   1
   6  -1  -4 234.955  17.159   2
  -6   1   4 239.825  19.067   1
  -6   1   4 186.871  19.767   6
  -6   1   4 207.399  24.600   1
   5  -1  -4 189.276  12.419   2
   5  -1  -4 182.351  27.114   1
   5  -1  -4 230.723  15.277   1
  -5   1   4 167.890  18.664   1
  -5   1   4 225.822  15.613   1
   4  -1  -4 23.5348  6.1556   1
   4  -1  -4 20.3216  4.7833   1
   4  -1  -4 29.3700  3.1530   2
  -4   1   4 25.1395  6.0561   1
  -4   1   4 20.5884  3.1319   4
  -4   1   4 23.4285  5.9506   1
   3  -1  -4 3163.23  152.93   1
   3  -1  -4 3144.60  165.42   1
  -3   1   4 2996.19  124.06   1
  -3   1   4 3144.12  105.67   1
   2  -1  -4 210.419   9.929   1
   2  -1  -4 213.109  14.493   1
  -2   1   4 234.412  14.168   1
  -2   1   4 220.032  12.923   1
   1  -1  -4 232.183  13.214   1
   1  -1  -4 201.226  12.847   1
  -1   1   4 204.452  10.695   1
  -1   1   4 192.344  12.677   1
   0  -1  -4 1295.66   47.67   1
   0  -1  -4 1300.04   52.26   1
   0   1   4 1317.05   68.37   1
   0   1   4 1342.34   47.97   1
  -1  -1  -4 268.496   9.339   1
  -1  -1  -4 247.257  11.241   1
   1   1   4 303.274  16.205   1
   1   1   4 259.054  11.791   1
  -2  -1  -4 1595.78   81.50   1
  -2  -1  -4 1656.24   71.24   1
   2   1   4 1542.94   87.32   7
   2   1   4 1626.80   55.60   1
   2   1   4 1614.94   67.69   1
  -3  -1  -4 6353.42  277.84   3
  -3  -1  -4 6387.40  332.75   5
  -3  -1  -4 6341.31  265.30   1
  -3  -1  -4 6694.58  218.95   2
  -3  -1  -4 6361.98  242.87   1
   3   1   4 6231.73  458.50   1
   3   1   4 6610.22  312.66   1
   3   1   4 6740.56  240.11   6
  -4  -1  -4 446.724  19.304   2
  -4  -1  -4 418.174  19.049   1
  -4  -1  -4 432.563  18.822   5
  -4  -1  -4 403.065  20.302   1
   4   1   4 467.426  18.819   1
   4   1   4 420.477  23.364   1
   4   1   4 446.299  23.052   3
  -5  -1  -4 1315.91   51.20   1
  -5  -1  -4 1329.19   57.80   6
  -5  -1  -4 1250.08   75.37   1
  -5  -1  -4 1341.94   62.83   5
  -5  -1  -4 1373.65   71.44   2
   5   1   4 1322.74   50.78   1
   5   1   4 1442.32   71.12   1
   5   1   4 1313.89   70.62   3
  -6  -1  -4 127.071   8.658   1
  -6  -1  -4 124.505  11.875   6
  -6  -1  -4 112.183   7.932   1
  -6  -1  -4 126.962   9.827   5
  -6  -1  -4 126.901  11.338   2
   6   1   4 136.432   6.850   1
   6   1   4 116.799   8.558   1
   6   1   4 104.298   9.900   3
  -7  -1  -4 499.452  22.559   1
  -7  -1  -4 502.636  46.174   1
  -7  -1  -4 503.606  37.372   6
  -7  -1  -4 536.705  34.592   2
  -7  -1  -4 524.194  40.180   5
   7   1   4 516.984  29.965   1
   7   1   4 500.269  29.934   1
   7   1   4 488.392  36.185   3
  -8  -1  -4 16.2037  3.5175   1
  -8  -1  -4 20.7418  4.2568   5
  -8  -1  -4 17.9440  5.5618   2
  -8  -1  -4 16.9317  4.6037   1
  -8  -1  -4 12.8006  6.3852   6
   8   1   4 12.7390  3.6927   1
   8   1   4 14.3410  4.1838   3
   8   1   4 20.4484  4.6925   1
  -9  -1  -4 17.1358  6.3187   6
  -9  -1  -4 22.7291  4.6035   1
  -9  -1  -4 29.3650  6.1813   1
   9   1   4 23.0517  5.0744   1
   9   1   4 25.7832  8.3776   3
   9   1   4 23.7567  5.9406   1
 -10  -1  -4 140.642  14.477   1
 -10  -1  -4 125.047  18.718   6
 -10  -1  -4 137.263  22.652   1
  10   1   4 117.524  14.246   1
  10   1   4 139.263  21.028   3
  10   1   4 109.914  14.905   1
 -11  -1  -4 41.4374  7.7518   1
  11   1   4 49.2460 13.1006   3
 -12  -1  -4 -2.7006  4.8713   1
  12   1   4 -4.4784  7.0725   3
   9  -2  -4 -6.0341  6.0826   1
  -9   2   4 9.21529 9.38505   1
   8  -2  -4 48.5093 12.4682   1
  -8   2   4 69.0602 12.4234   1
  -8   2   4 94.7581 14.3288   1
   7  -2  -4 6.97973 6.00659   1
  -7   2   4 9.46448 7.25280   1
  -7   2   4 4.94617 6.48884   1
   6  -2  -4 523.128  52.107   1
   6  -2  -4 491.329  43.847   1
  -6   2   4 493.581  50.861   1
  -6   2   4 535.588  29.519   1
   5  -2  -4 765.911  65.350   1
   5  -2  -4 766.117  32.747   1
  -5   2   4 674.134  45.857   1
  -5   2   4 776.744  72.261   1
   4  -2  -4 2591.53  135.05   1
   4  -2  -4 2619.07  145.05   1
  -4   2   4 2501.65  148.09   4
  -4   2   4 2709.60  139.95   1
  -4   2   4 2529.27  145.47   1
   3  -2  -4 2842.62  154.39   1
   3  -2  -4 2910.27  119.74   1
  -3   2   4 2766.99   94.90   4
  -3   2   4 2695.83  142.25   1
  -3   2   4 2945.45  117.93   1
   2  -2  -4 3.46136 2.53974   1
   2  -2  -4 5.07716 3.61101   1
  -2   2   4 6.39372 4.27498   1
  -2   2   4 2.04054 2.80807   1
   1  -2  -4 716.617  31.668   2
   1  -2  -4 660.124  30.209   1
   1  -2  -4 719.199  24.215   1
  -1   2   4 639.380  30.701   1
  -1   2   4 633.320  21.928   1
   0  -2  -4 3208.09  109.33   2
   0  -2  -4 3154.38  106.22   1
   0  -2  -4 3111.48  135.27   1
   0   2   4 3258.84  140.95   1
   0   2   4 3103.25   99.75   1
  -1  -2  -4 1135.01   49.69   5
  -1  -2  -4 1119.10   52.69   1
  -1  -2  -4 1162.75   44.60   2
  -1  -2  -4 1150.12   59.04   1
  -1  -2  -4 1162.61   64.29   7
   1   2   4 1127.52   59.59   1
   1   2   4 1183.73   64.36   1
  -2  -2  -4 57.4046  5.9525   3
  -2  -2  -4 53.8203  5.0830   1
  -2  -2  -4 59.0034  4.9965   2
  -2  -2  -4 55.3536  5.7289   5
  -2  -2  -4 53.5347  4.0132   1
   2   2   4 51.5690  3.7219   1
   2   2   4 42.9471  3.4885   1
   2   2   4 43.4022  3.2576   7
  -3  -2  -4 52.5668  4.1583   1
  -3  -2  -4 50.8011  6.1528   2
  -3  -2  -4 56.6878  6.6132   5
  -3  -2  -4 60.1460  4.2597   1
  -3  -2  -4 64.3415  6.0215   3
   3   2   4 52.8068  5.3446   3
   3   2   4 51.4278  4.0801   6
   3   2   4 56.8176  4.3081   1
   3   2   4 54.0430  3.8673   1
   3   2   4 65.6203  5.9389   2
  -4  -2  -4 1719.72   70.29   2
  -4  -2  -4 1594.99   87.89   1
  -4  -2  -4 1714.65   93.30   5
  -4  -2  -4 1801.76   86.38   1
   4   2   4 1612.25   68.68   2
   4   2   4 1697.48   71.03   5
   4   2   4 1672.89  122.90   1
   4   2   4 1736.63   75.58   1
   4   2   4 1646.39   60.54   3
   4   2   4 1720.90  114.41   6
  -5  -2  -4 271.187  22.348   5
  -5  -2  -4 287.766  19.907   2
  -5  -2  -4 275.125  12.919   1
  -5  -2  -4 266.849  12.186   1
   5   2   4 252.956  14.738   6
   5   2   4 317.355  20.213   5
   5   2   4 253.728  15.287   1
   5   2   4 295.668  16.955   2
   5   2   4 279.708  16.023   1
   5   2   4 298.933  20.110   3
  -6  -2  -4 360.732  29.773   2
  -6  -2  -4 338.333  18.110   1
  -6  -2  -4 362.224  24.935   5
  -6  -2  -4 395.717  26.471   1
  -6  -2  -4 357.661  20.294   6
   6   2   4 356.462  19.887   1
   6   2   4 335.541  18.705   2
   6   2   4 336.774  21.575   5
   6   2   4 317.328  20.730   3
   6   2   4 373.011  19.701   1
  -7  -2  -4 92.0672 17.1533   6
  -7  -2  -4 92.4470  8.4232   1
  -7  -2  -4 101.417   8.651   5
  -7  -2  -4 90.7570  8.5263   1
   7   2   4 95.5192  6.7244   1
   7   2   4 100.357  10.663   5
   7   2   4 101.896   9.275   2
   7   2   4 104.272  10.790   1
   7   2   4 118.906  12.402   3
  -8  -2  -4 62.3379  7.8109   6
  -8  -2  -4 47.2053  5.2998   1
  -8  -2  -4 45.3771  5.6800   1
   8   2   4 51.8685  6.6592   1
   8   2   4 36.4785  7.3005   3
   8   2   4 45.7939  5.1400   1
  -9  -2  -4 9.56865 3.07057   1
  -9  -2  -4 6.98078 7.71970   6
  -9  -2  -4 6.65206 2.91308   1
   9   2   4 8.22772 2.58038   1
   9   2   4 9.55088 3.41378   1
 -10  -2  -4 23.7807  4.9104   1
 -10  -2  -4 3.42848 4.98608   6
  10   2   4 20.8677  5.2037   4
  10   2   4 15.5900  4.2181   1
  10   2   4 13.0959  4.8879   1
 -11  -2  -4 49.0553  8.4395   1
  11   2   4 46.8010 11.6235   3
 -12  -2  -4 4.11966 3.44488   1
  12   2   4 -4.7708  9.2494   3
   9  -3  -4 -1.7712  6.9812   1
  -9   3   4 -0.7376  5.8851   1
   8  -3  -4 101.488  11.811   1
  -8   3   4 90.0117 15.3585   1
  -8   3   4 96.3298 16.5196   1
   7  -3  -4 16.1437  9.7380   1
  -7   3   4 39.5894 10.1769   1
  -7   3   4 36.2125 10.6323   1
   6  -3  -4 427.052  40.773   1
   6  -3  -4 479.484  44.731   1
  -6   3   4 490.984  42.203   1
  -6   3   4 432.736  39.583   1
   5  -3  -4 789.824  43.200   5
   5  -3  -4 582.716  37.388   1
   5  -3  -4 670.494  64.263   1
  -5   3   4 698.169  58.488   1
  -5   3   4 667.868  65.355   1
   4  -3  -4 493.601  27.791   5
   4  -3  -4 505.766  28.953   1
   4  -3  -4 434.434  26.583   1
  -4   3   4 468.758  16.823   1
  -4   3   4 450.037  24.867   4
  -4   3   4 453.632  34.747   1
   3  -3  -4 167.707  12.987   1
   3  -3  -4 197.535  13.594   5
   3  -3  -4 166.703  12.106   1
  -3   3   4 226.273  13.717   1
  -3   3   4 196.117  16.770   4
  -3   3   4 183.291  10.717   1
   2  -3  -4 1557.19   55.49   1
   2  -3  -4 1504.67   63.52   1
   2  -3  -4 1601.83   76.13   5
  -2   3   4 1425.59   58.31   1
  -2   3   4 1579.16   76.53   4
  -2   3   4 1636.83   60.09   1
   1  -3  -4 3340.41  150.56   1
   1  -3  -4 3196.26  115.67   5
   1  -3  -4 3105.93   98.84   1
  -1   3   4 3198.97   98.16   4
  -1   3   4 3215.07   91.75   1
  -1   3   4 3193.41  134.37   1
   0  -3  -4 1244.18   51.89   1
   0  -3  -4 1242.12   60.81   1
   0  -3  -4 1159.50   47.39   5
   0   3   4 1232.45   38.23   1
   0   3   4 1226.32   40.82   2
   0   3   4 1276.70   60.05   1
  -1  -3  -4 455.233  21.564   1
  -1  -3  -4 465.896  26.032   7
  -1  -3  -4 472.796  30.018   3
  -1  -3  -4 454.621  19.839   1
  -1  -3  -4 451.940  23.394   5
   1   3   4 434.624  22.444   1
   1   3   4 476.173  27.543   1
   1   3   4 450.083  18.365   2
   1   3   4 457.647  18.649   5
  -2  -3  -4 514.847  29.042   1
  -2  -3  -4 536.912  29.173   5
  -2  -3  -4 522.501  21.365   3
  -2  -3  -4 521.480  26.459   1
  -2  -3  -4 521.667  29.705   7
   2   3   4 558.384  28.941   7
   2   3   4 561.929  28.294   2
   2   3   4 523.242  31.060   5
   2   3   4 527.537  34.553   1
   2   3   4 556.608  26.175   1
  -3  -3  -4 20.5970  3.9312   3
  -3  -3  -4 13.1739  3.8550   5
   3   3   4 16.9111  2.1398   1
   3   3   4 15.9326  1.6358   1
   3   3   4 7.78268 2.78345   7
   3   3   4 17.1083  3.4634   2
   3   3   4 18.9341  4.7092   5
   3   3   4 17.9873  4.5790   3
  -4  -3  -4 310.045  14.744   5
  -4  -3  -4 276.793  15.074   1
  -4  -3  -4 342.354  17.579   1
   4   3   4 334.333  20.719   1
   4   3   4 279.884  11.547   1
   4   3   4 301.742  16.208   3
   4   3   4 322.259  16.696   6
   4   3   4 294.137  15.670   2
   4   3   4 315.577  25.879   7
   4   3   4 285.402  16.086   5
  -5  -3  -4 740.083  48.093   1
  -5  -3  -4 826.231  51.257   5
  -5  -3  -4 857.170  40.078   1
   5   3   4 736.625  39.978   3
   5   3   4 839.458  35.722   2
   5   3   4 789.298  43.787   6
   5   3   4 739.323  39.754   1
   5   3   4 892.917  40.766   1
   5   3   4 846.474  42.245   5
  -6  -3  -4 176.502  11.893   1
  -6  -3  -4 211.534  11.041   1
   6   3   4 198.579  11.691   2
   6   3   4 156.198  18.538   3
   6   3   4 225.808  11.654   1
   6   3   4 223.620  15.781   5
   6   3   4 172.392   9.587   6
   6   3   4 197.908  13.268   1
  -7  -3  -4 708.496  48.867   1
  -7  -3  -4 694.847  37.826   1
   7   3   4 770.067  55.631   5
   7   3   4 738.277  38.000   1
   7   3   4 692.122  63.968   1
   7   3   4 733.489  39.500   2
  -8  -3  -4 1084.77   77.29   1
  -8  -3  -4 1118.45   89.96   6
   8   3   4 1136.78   68.53   4
   8   3   4 1114.62   97.47   1
   8   3   4 1113.63   64.73   5
   8   3   4 1107.66   62.44   2
   8   3   4 1185.70   67.43   1
  -9  -3  -4 960.131  71.233   6
  -9  -3  -4 982.271 124.929   1
   9   3   4 998.299 108.708   1
   9   3   4 942.212  91.995   5
   9   3   4 973.280  56.974   1
   9   3   4 1014.59   57.81   4
   9   3   4 1093.99   76.45   2
 -10  -3  -4 11.2772  7.3399   6
 -10  -3  -4 23.8317  4.8898   1
  10   3   4 26.3237  5.6772   4
  10   3   4 16.7149  5.4752   5
  10   3   4 14.9581  4.7532   1
 -11  -3  -4 2.21269 4.48441   1
   9  -4  -4 74.0839 13.7405   1
  -9   4   4 40.3946 11.3143   1
   8  -4  -4 47.9406 12.7391   1
  -8   4   4 31.5226 10.5932   1
   7  -4  -4 67.8337  9.8226   1
  -7   4   4 78.9456 11.6069   1
  -7   4   4 85.3557 14.7000   1
   6  -4  -4 34.4699  6.9757   1
   6  -4  -4 30.8777 10.8663   1
  -6   4   4 32.2104  8.2060   1
   5  -4  -4 290.332  21.956   1
   5  -4  -4 270.642  23.066   1
  -5   4   4 248.769  21.352   1
  -5   4   4 305.692  21.219   1
   4  -4  -4 622.756  50.900   1
   4  -4  -4 672.783  41.697   1
  -4   4   4 648.701  39.107   4
  -4   4   4 538.737  47.829   1
  -4   4   4 619.101  42.219   1
   3  -4  -4 15.1225  5.3950   1
   3  -4  -4 8.63491 3.91145   1
  -3   4   4 4.25071 5.54817   1
  -3   4   4 11.2560  4.8567   1
  -3   4   4 10.6767  2.8608   4
   2  -4  -4 650.026  24.876   5
   2  -4  -4 695.923  43.995   1
   2  -4  -4 643.214  22.745   1
  -2   4   4 634.983  28.768   4
  -2   4   4 690.411  24.088   1
  -2   4   4 639.921  34.894   1
  -2   4   4 640.320  37.285   2
   1  -4  -4 521.357  26.474   1
   1  -4  -4 515.835  26.280   5
   1  -4  -4 523.600  23.744   1
  -1   4   4 525.741  19.914   4
  -1   4   4 484.032  19.216   1
  -1   4   4 513.741  17.635   1
  -1   4   4 498.969  27.365   5
   0  -4  -4 3647.75  138.25   1
   0  -4  -4 3722.57  136.90   5
   0  -4  -4 3745.59  176.41   1
   0  -4  -4 3810.14  193.93   3
   0   4   4 3766.73  157.89   5
   0   4   4 3741.49  172.96   1
   0   4   4 3785.07  140.35   4
   0   4   4 3742.51  107.94   1
  -1  -4  -4 1452.54   57.63   1
  -1  -4  -4 1410.22   57.07   1
  -1  -4  -4 1421.78  107.59   3
  -1  -4  -4 1422.48   74.96   7
  -1  -4  -4 1483.22   57.82   5
   1   4   4 1463.47   52.25   5
   1   4   4 1432.96   55.23   1
   1   4   4 1412.14   61.60   4
  -2  -4  -4 1002.67   39.25   1
  -2  -4  -4 1017.57   35.87   5
  -2  -4  -4 967.918  62.165   7
  -2  -4  -4 1035.53   36.93   1
  -2  -4  -4 1076.88   41.53   3
   2   4   4 990.270  58.603   3
   2   4   4 1031.20   53.66   1
   2   4   4 1014.92   50.78   5
   2   4   4 1050.14   44.37   7
   2   4   4 985.428  36.236   2
   2   4   4 1042.82   51.19   4
   2   4   4 1014.68   31.41   1
  -3  -4  -4 1280.30   35.96   5
  -3  -4  -4 1297.63   55.24   1
  -3  -4  -4 1167.89   79.14   1
   3   4   4 1384.48   59.42   1
   3   4   4 1164.58   64.35   1
   3   4   4 1229.27   63.55   3
   3   4   4 1260.63   59.08   2
   3   4   4 1325.64   50.88   4
   3   4   4 1240.55   47.78   5
   3   4   4 1222.41   58.07   7
   4   4   4 253.434  15.698   3
   4   4   4 294.306  17.949   6
   4   4   4 297.633  14.223   4
   4   4   4 256.309  18.300   2
   4   4   4 277.374  19.714   7
   4   4   4 298.105  22.474   5
   5   4   4 120.869   8.947   2
   5   4   4 121.256  11.197   3
   5   4   4 131.395   9.374   6
   5   4   4 141.285  14.245   7
   5   4   4 116.782  11.324   5
   5   4   4 114.343   8.680   4
   6   4   4 68.8207  8.2026   2
   6   4   4 84.9675  8.2117   4
   6   4   4 76.3832 10.5993   3
   6   4   4 65.4638  8.4876   6
   6   4   4 93.8245  9.3951   5
   7   4   4 730.034  46.572   4
   7   4   4 797.493  50.515   6
   7   4   4 737.546  51.574   5
   7   4   4 784.767  68.284   2
  -8  -4  -4 514.419  29.988   1
  -8  -4  -4 581.275  40.072   1
   8   4   4 492.717  59.642   1
   8   4   4 528.828  43.299   4
   8   4   4 587.625  67.390   1
   8   4   4 543.398  41.452   2
   8   4   4 537.533  42.271   5
  -9  -4  -4 508.533  60.737   1
  -9  -4  -4 458.733  44.765   1
   9   4   4 500.193  42.858   2
   9   4   4 468.795  47.549   5
   9   4   4 489.869  50.351   4
   9   4   4 426.990  31.602   1
   9   4   4 548.740  38.408   1
 -10  -4  -4 266.039  27.646   1
 -10  -4  -4 266.445  27.650   1
  10   4   4 261.312  23.432   4
  10   4   4 257.148  31.332   2
 -11  -4  -4 46.7328  5.8078   1
  11   4   4 30.1887 10.1788   2
   9  -5  -4 225.210  21.880   1
  -9   5   4 227.173  25.252   1
   8  -5  -4 58.3590  8.4972   1
  -8   5   4 77.8878 12.9466   1
   7  -5  -4 -0.6306  5.5668   1
  -7   5   4 -12.301   7.973   1
  -7   5   4 -2.9949  5.7526   1
   6  -5  -4 79.3238 13.1154   1
  -6   5   4 66.7429 10.5023   1
  -6   5   4 57.3855 13.2217   1
   5  -5  -4 9.66328 6.20756   1
   5  -5  -4 4.51513 7.26848   1
  -5   5   4 18.2557  5.7529   1
  -5   5   4 31.0266  6.1726   1
   4  -5  -4 3.84275 4.24865   1
   4  -5  -4 1.87035 5.00871   1
  -4   5   4 -0.4804  3.1060   4
  -4   5   4 8.27105 5.10538   1
  -4   5   4 5.72804 4.93427   1
  -4   5   4 7.11422 1.22439   2
   3  -5  -4 5.44577 3.53093   1
   3  -5  -4 7.58860 4.42040   1
  -3   5   4 6.48015 2.98891   4
  -3   5   4 0.90870 3.34487   1
  -3   5   4 0.03858 3.45304   1
   2  -5  -4 859.607  38.923   1
   2  -5  -4 868.044  35.411   1
  -2   5   4 869.262  29.867   1
  -2   5   4 910.730  43.871   5
  -2   5   4 894.126  45.261   1
  -2   5   4 848.199  41.841   4
   1  -5  -4 84.7988  6.6356   3
   1  -5  -4 94.7980  8.1915   1
   1  -5  -4 91.3516  7.5032   1
  -1   5   4 89.2656  8.7937   1
  -1   5   4 76.1313  7.9982   1
  -1   5   4 83.0176  7.2863   4
  -1   5   4 109.741   7.742   5
   0  -5  -4 435.688  21.197   1
   0  -5  -4 444.087  21.794   3
   0  -5  -4 400.961  16.513   1
   0   5   4 444.026  19.227   5
   0   5   4 431.699  21.366   1
   0   5   4 391.146  22.948   4
   0   5   4 436.351  27.205   1
  -1  -5  -4 67.7947  5.6691   7
  -1  -5  -4 74.1179  6.9926   3
  -1  -5  -4 69.6186  5.4580   1
  -1  -5  -4 60.5446  4.6484   1
   1   5   4 60.1617  6.7227   4
   1   5   4 71.4268  6.4075   5
   1   5   4 59.6815  5.7510   1
   1   5   4 63.4193  5.1013   1
  -2  -5  -4 391.616  15.966   1
  -2  -5  -4 390.097  17.651   1
  -2  -5  -4 395.130  20.258   7
   2   5   4 380.444  14.636   1
   2   5   4 376.766  25.690   4
   2   5   4 421.103  20.844   5
   2   5   4 393.877  21.463   3
   2   5   4 409.468  17.738   1
  -3  -5  -4 728.044  47.044   1
  -3  -5  -4 800.563  36.597   1
   3   5   4 794.865  47.962   7
   3   5   4 742.532  27.902   3
   3   5   4 806.352  91.906   1
   3   5   4 732.914  39.476   4
   3   5   4 808.408  38.667   5
   3   5   4 724.067  35.417   1
   4   5   4 491.263  33.394   6
   4   5   4 490.765  43.321   7
   4   5   4 524.576  21.793   3
   4   5   4 497.359  29.531   2
   4   5   4 504.253  37.829   5
   4   5   4 551.593  38.922   4
   5   5   4 40.7996  6.6257   3
   5   5   4 38.0930  7.2058   2
   5   5   4 25.5641  4.8570   4
   5   5   4 32.6887  5.7760   7
   5   5   4 36.9108  8.0508   5
   5   5   4 27.2325  5.0923   6
   6   5   4 224.635  19.876   7
   6   5   4 248.685  21.312   2
   6   5   4 274.530  24.271   3
   6   5   4 252.969  25.286   5
   6   5   4 230.354  22.161   4
   6   5   4 262.516  23.165   6
   7   5   4 202.510  15.982   4
   7   5   4 186.375  16.466   6
   7   5   4 173.523  22.127   2
   7   5   4 212.107  21.801   5
   7   5   4 171.476  25.524   7
   8   5   4 206.120  15.691   4
   8   5   4 185.557  15.254   6
   8   5   4 169.475  16.783   5
   8   5   4 185.935  18.129   2
   8   5   4 139.563  25.710   7
   9   5   4 298.372  21.770   4
   9   5   4 269.667  27.628   2
   9   5   4 269.261  31.267   5
  10   5   4 375.571  48.273   2
  11   5   4 -7.9067  8.4786   2
   9  -6  -4 1.57775 8.68337   1
  -9   6   4 13.8807  9.7169   1
   8  -6  -4 2.96284 6.77910   1
  -8   6   4 2.28529 8.00725   1
   7  -6  -4 89.8377 12.4246   1
  -7   6   4 121.499  13.557   1
   6  -6  -4 343.948  38.508   1
   6  -6  -4 381.448  28.403   1
  -6   6   4 377.300  37.193   1
  -6   6   4 374.664  23.817   1
  -6   6   4 350.495  25.775   2
   5  -6  -4 205.153  20.476   1
   5  -6  -4 218.305  28.470   1
  -5   6   4 250.347  22.273   1
  -5   6   4 260.862  22.827   1
  -5   6   4 222.520  17.312   2
   4  -6  -4 9.38559 4.70298   4
   4  -6  -4 15.0957  6.7896   1
   4  -6  -4 12.2771  6.8127   1
  -4   6   4 17.1649  7.6161   1
  -4   6   4 6.13484 4.50368   1
   3  -6  -4 20.6090  6.7576   1
   3  -6  -4 29.8541  5.3520   4
   3  -6  -4 18.0729  5.5889   1
  -3   6   4 22.0135  3.5470   5
  -3   6   4 23.3903  6.4185   1
  -3   6   4 15.0132  4.9662   4
  -3   6   4 18.4829  5.5398   1
   2  -6  -4 11.9430  4.6181   4
   2  -6  -4 14.6760  3.7781   3
   2  -6  -4 22.5868  5.2396   1
   2  -6  -4 15.9165  5.5716   1
  -2   6   4 25.0103  5.5207   4
  -2   6   4 18.5333  5.5890   1
  -2   6   4 22.2677  4.5003   1
  -2   6   4 21.0999  3.7233   5
   1  -6  -4 420.324  19.212   1
   1  -6  -4 421.465  19.762   1
   1  -6  -4 415.966  23.969   4
   1  -6  -4 415.040  21.295   3
  -1   6   4 460.163  20.575   5
  -1   6   4 437.100  26.864   1
  -1   6   4 418.126  18.802   1
  -1   6   4 419.105  19.203   4
   0  -6  -4 689.762  23.028   1
   0  -6  -4 740.768  45.124   7
   0  -6  -4 733.374  32.965   1
   0  -6  -4 728.426  35.543   4
   0  -6  -4 717.443  39.984   3
   0   6   4 693.899  39.634   1
   0   6   4 725.721  47.943   5
   0   6   4 637.637  31.682   4
   0   6   4 690.909  35.705   1
  -1  -6  -4 158.479   8.767   1
  -1  -6  -4 176.293  10.354   1
  -1  -6  -4 163.195  11.403   4
  -1  -6  -4 191.061  12.516   7
   1   6   4 147.663  12.257   5
   1   6   4 166.102  11.659   4
   1   6   4 152.182   9.695   1
   1   6   4 153.647  12.796   1
  -2  -6  -4 44.4313  4.1184   1
  -2  -6  -4 42.1053  4.8211   7
  -2  -6  -4 38.4643  4.3501   1
   2   6   4 37.7084  7.0199   5
   2   6   4 50.1919  6.7673   4
   2   6   4 41.9240  4.2846   3
   2   6   4 38.4369  4.0473   1
   2   6   4 50.5344  3.8518   1
  -3  -6  -4 9.51447 1.38989   1
  -3  -6  -4 8.46973 3.67317   7
  -3  -6  -4 15.8532  2.0243   1
   3   6   4 7.58017 3.40172   4
   3   6   4 14.5793  5.9045   5
   3   6   4 12.6732  2.1348   1
   3   6   4 11.5320  1.9137   1
   3   6   4 8.32943 4.71915   3
   3   6   4 18.5322  4.9209   7
   4   6   4 -1.3811  4.0196   5
   4   6   4 9.75969 4.26360   6
   4   6   4 7.26740 4.18437   3
   4   6   4 15.6679  4.3300   4
   5   6   4 5.19839 4.57860   2
   5   6   4 -1.0092  3.7499   5
   5   6   4 1.75018 4.15160   3
   5   6   4 -0.6375  3.5771   7
   5   6   4 2.71190 5.32201   4
   5   6   4 14.7998  6.1534   6
   6   6   4 538.159  71.158   5
   6   6   4 640.400  48.364   7
   6   6   4 614.230  55.740   6
   6   6   4 715.939  46.490   2
   6   6   4 732.169  77.383   3
   6   6   4 711.010  33.442   4
   7   6   4 8.76489 6.70863   2
   7   6   4 7.49508 6.29578   5
   7   6   4 7.13756 6.61091   7
   7   6   4 8.98603 4.45239   4
   7   6   4 9.28057 6.32190   6
   7   6   4 9.91656 5.81456   3
   8   6   4 65.3292  8.8440   4
   8   6   4 67.2069 13.2422   2
   8   6   4 73.6754 10.6911   6
   8   6   4 59.8824 31.5795   5
   9   6   4 15.4165  4.6482   4
   9   6   4 12.2215  7.4974   2
  10   6   4  3.0617 10.9986   2
   8  -7  -4 40.0456 13.2123   1
  -8   7   4 38.6945 14.2706   1
   7  -7  -4 10.5542  8.5757   1
  -7   7   4 5.21190 7.82888   1
   6  -7  -4 117.585  17.498   1
   6  -7  -4 158.241  18.969   1
  -6   7   4 164.323  16.727   1
  -6   7   4 136.425   9.663   2
   5  -7  -4 72.0680  9.5075   1
   5  -7  -4 73.5475 12.7179   1
   5  -7  -4 64.8032  9.8700   4
  -5   7   4 62.1090 10.6181   1
  -5   7   4 55.0680 10.8655   1
   4  -7  -4 220.553  20.062   1
   4  -7  -4 198.200  19.959   4
   4  -7  -4 204.157  17.823   1
  -4   7   4 173.705  17.320   1
  -4   7   4 170.203  22.649   1
  -4   7   4 217.100  17.407   5
   3  -7  -4 498.329  29.455   1
   3  -7  -4 427.493  29.298   1
   3  -7  -4 478.311  43.277   3
   3  -7  -4 401.577  22.249   4
  -3   7   4 446.507  29.956   1
  -3   7   4 445.247  30.254   1
  -3   7   4 452.782  27.092   5
   2  -7  -4 1.72104 2.76048   3
   2  -7  -4 1.98036 4.24430   1
   2  -7  -4 7.40107 3.77748   4
   2  -7  -4 6.45287 6.01568   1
  -2   7   4 -0.5236  3.3822   5
  -2   7   4 7.06294 4.26896   1
  -2   7   4 -2.4713  5.0466   1
  -2   7   4 -1.3999  4.6352   4
   1  -7  -4 1414.32   62.88   1
   1  -7  -4 1432.45   95.21   4
   1  -7  -4 1523.09   74.45   1
   1  -7  -4 1535.75   98.43   3
  -1   7   4 1475.10  129.38   1
  -1   7   4 1447.62   60.77   5
  -1   7   4 1457.39   72.69   4
  -1   7   4 1458.85   69.17   1
   0  -7  -4 142.621  11.817   7
   0  -7  -4 133.094  15.568   4
   0  -7  -4 147.576   9.228   1
   0  -7  -4 128.118   9.807   1
   0   7   4 136.023  11.850   4
   0   7   4 129.307  12.740   5
   0   7   4 134.043  13.604   1
   0   7   4 144.027  12.418   1
  -1  -7  -4 2.72207 4.16474   4
  -1  -7  -4 0.75596 2.18897   1
  -1  -7  -4 -2.7852  2.5962   1
  -1  -7  -4 0.77358 4.67172   7
   1   7   4 3.86186 2.24694   1
   1   7   4 -1.9562  4.6684   4
   1   7   4 -0.9291  2.1543   3
   1   7   4 1.96976 2.31230   1
   1   7   4 1.68518 3.90869   5
  -2  -7  -4 342.200  20.467   1
  -2  -7  -4 323.597  13.575   1
  -2  -7  -4 358.307  30.505   4
  -2  -7  -4 361.194  24.046   7
   2   7   4 369.611  21.989   1
   2   7   4 416.243  21.686   4
   2   7   4 378.363  14.852   1
   2   7   4 357.547  20.296   5
   2   7   4 382.489  24.953   3
  -3  -7  -4 228.802  17.693   1
  -3  -7  -4 222.799  15.357   7
   3   7   4 209.520  12.635   1
   3   7   4 228.571  15.272   3
   3   7   4 239.078  19.497   4
   3   7   4 258.803  19.451   5
   3   7   4 233.939  13.268   1
  -4  -7  -4 655.963  53.068   1
  -4  -7  -4 548.117  40.234   1
   4   7   4 602.003  55.971   7
   4   7   4 670.122  53.220   1
   4   7   4 647.995  38.612   6
   4   7   4 648.960  37.427   4
   4   7   4 593.992  42.128   3
   4   7   4 627.467  57.606   5
   4   7   4 539.593  33.246   1
   5   7   4 10.6611  5.8840   4
   5   7   4 10.5534  5.3576   3
   5   7   4 5.86111 5.17403   6
   5   7   4 10.6939  5.4597   7
   6   7   4 286.510  33.448   7
   6   7   4 293.346  27.015   4
   6   7   4 308.059  27.750   3
   6   7   4 295.590  17.089   6
   6   7   4 227.258  24.518   5
   7   7   4 15.3082  7.2359   6
   7   7   4 17.3180  8.9176   3
   7   7   4 5.93197 8.85124   2
   7   7   4 9.44402 6.43710   4
   8   7   4 -4.6671  7.3685   6
   8   7   4  9.9974 10.4782   2
   8   7   4 3.55273 4.45822   4
   9   7   4 48.3767  9.5667   6
   9   7   4 31.8885 11.6478   2
   8  -8  -4  7.7898 10.3378   1
  -8   8   4 13.4462 10.3344   1
   7  -8  -4 -0.9502 10.0686   1
  -7   8   4  7.0445 11.6035   1
   6  -8  -4 56.9221 10.0640   4
   6  -8  -4 64.0605 13.0587   1
  -6   8   4 35.5782 10.3675   1
   5  -8  -4 164.811  20.611   1
   5  -8  -4 158.548  14.328   3
   5  -8  -4 117.949  14.363   4
   5  -8  -4 150.338  17.357   1
  -5   8   4 128.589  17.076   1
  -5   8   4 167.571  17.918   5
   4  -8  -4 25.0384  7.3980   4
   4  -8  -4 31.8945  6.1308   3
   4  -8  -4 37.3188  7.8959   1
   4  -8  -4 39.5847 11.5474   1
  -4   8   4 21.0793  8.9793   1
  -4   8   4 30.2710  8.2411   1
  -4   8   4 36.3942  6.8581   5
   3  -8  -4 0.59248 4.55905   1
   3  -8  -4 5.30570 3.15152   3
   3  -8  -4 -3.9737  6.9148   4
   3  -8  -4 1.88076 6.88650   1
  -3   8   4 9.73918 5.29098   1
  -3   8   4 4.26355 2.85048   5
  -3   8   4 2.56080 5.92361   1
   2  -8  -4 1319.62   84.83   1
   2  -8  -4 1421.56  116.19   1
   2  -8  -4 1232.08   95.84   4
  -2   8   4 1355.74   70.72   5
  -2   8   4 1276.85  110.01   1
  -2   8   4 1313.66   84.38   1
   1  -8  -4 3115.80  189.39   1
   1  -8  -4 3359.08  223.21   1
   1  -8  -4 3087.47  223.64   4
   1  -8  -4 3228.44  275.09   7
  -1   8   4 3174.00  268.02   1
  -1   8   4 3244.66  238.41   1
  -1   8   4 3345.15  203.01   5
  -1   8   4 3232.58  158.32   4
   0  -8  -4 1.15104 3.40564   1
   0  -8  -4 -2.0496  4.5868   4
   0  -8  -4 -0.5558  4.7578   7
   0  -8  -4 0.64268 3.42354   1
   0   8   4 5.04363 5.53426   4
   0   8   4 -3.9807  3.3985   1
   0   8   4 -0.5420  4.2143   5
   0   8   4 5.94437 3.84425   1
  -1  -8  -4 307.623  25.043   1
  -1  -8  -4 322.583  26.604   4
  -1  -8  -4 332.369  24.594   7
  -1  -8  -4 308.812  20.534   1
   1   8   4 339.675  25.965   4
   1   8   4 294.635  24.741   1
   1   8   4 345.729  21.209   3
   1   8   4 322.616  20.673   1
   1   8   4 286.707  23.922   5
  -2  -8  -4 104.791   8.475   1
  -2  -8  -4 78.4862 10.5550   7
  -2  -8  -4 86.0162  6.8839   1
  -2  -8  -4 73.5490  8.6280   4
   2   8   4 96.3281 10.5074   4
   2   8   4 87.1962  8.6554   1
   2   8   4 101.524  12.603   1
   2   8   4 72.7692 11.9506   3
   2   8   4 82.1268 10.9053   5
  -3  -8  -4 10.9033  3.1977   1
  -3  -8  -4 7.88164 2.09361   1
  -3  -8  -4 7.03489 4.87095   7
   3   8   4 11.2825  6.8634   5
   3   8   4 12.2725  2.8024   1
   3   8   4 14.5973  3.0622   1
   3   8   4 -6.6924  5.7805   3
   3   8   4 11.7569  5.8408   4
  -4  -8  -4 1.26770 1.64537   1
  -4  -8  -4 -0.2506  1.2659   1
   4   8   4 -0.3382  1.2964   1
   4   8   4 -6.0731  4.0573   4
   4   8   4 -0.1955  5.4700   3
   4   8   4 -7.8087  4.3363   6
   4   8   4 -7.9499  5.3035   5
   4   8   4 -1.2110  1.3063   1
   5   8   4 322.464  26.350   6
   5   8   4 254.205  57.937   5
   5   8   4 294.408  20.801   3
   5   8   4 257.946  23.597   7
   5   8   4 309.343  27.337   4
   6   8   4 74.5916 10.2341   3
   6   8   4 66.5740 11.1346   4
   6   8   4 100.785  13.699   6
   7   8   4 14.5259  8.9440   3
   7   8   4 26.6639  9.9843   6
   7   8   4 17.1105  6.6217   4
   7   8   4 21.0891 10.2778   2
   8   8   4 141.495  21.637   2
   8   8   4 167.648  20.084   6
   8   8   4 135.020  21.163   3
   9   8   4 220.034  23.510   6
   9   8   4 140.513  28.672   2
   7  -9  -4 26.8300  9.8384   1
  -7   9   4 48.6273 13.0105   1
   6  -9  -4 60.2506 12.7418   1
  -6   9   4 75.2266 16.8297   1
   5  -9  -4 21.4243 10.7129   1
   5  -9  -4 14.3196 10.1687   1
   5  -9  -4 23.9568  4.4251   3
  -5   9   4 30.4715  5.5108   5
  -5   9   4 6.88805 9.79213   1
   4  -9  -4 41.5255 12.3022   1
   4  -9  -4 23.6960  6.9778   1
   4  -9  -4 10.6174  8.9486   4
  -4   9   4 25.9894  6.9448   5
  -4   9   4 33.1058  9.0825   1
   3  -9  -4 759.545  60.092   1
   3  -9  -4 802.566  70.589   1
   3  -9  -4 729.479  71.708   4
  -3   9   4 782.427  60.960   1
  -3   9   4 807.627 100.884   5
   2  -9  -4 449.023  47.969   1
   2  -9  -4 447.332  41.622   4
   2  -9  -4 459.345  41.898   1
  -2   9   4 471.720  34.559   5
  -2   9   4 433.125  32.727   1
  -2   9   4 447.034  33.455   1
   1  -9  -4 6.18507 3.84782   7
   1  -9  -4 -0.5775  3.9550   1
   1  -9  -4 -1.2463  4.8525   1
   1  -9  -4 0.03695 5.41344   4
  -1   9   4 4.03510 3.98947   1
  -1   9   4 6.70082 4.77173   5
  -1   9   4 4.90957 5.32309   1
   0  -9  -4 222.468  19.243   4
   0  -9  -4 203.663  20.635   7
   0  -9  -4 232.228  25.847   1
   0  -9  -4 188.352  27.344   1
   0   9   4 218.805  18.307   5
   0   9   4 212.646  23.237   1
   0   9   4 225.227  19.390   1
  -1  -9  -4 169.483  19.532   7
  -1  -9  -4 135.794  16.407   4
  -1  -9  -4 149.565  11.208   1
  -1  -9  -4 141.447  14.977   1
   1   9   4 140.976  21.095   1
   1   9   4 145.743  14.217   1
   1   9   4 129.551  13.971   5
   1   9   4 185.882  19.259   4
  -2  -9  -4 12.7402  4.7779   1
  -2  -9  -4 20.2174  5.5715   7
  -2  -9  -4 19.4098  7.1655   4
  -2  -9  -4 8.78089 4.13838   1
   2   9   4 15.6607  7.6548   5
   2   9   4 14.2267  6.4832   4
   2   9   4 14.6735  6.8382   3
   2   9   4 18.4047  5.7878   1
   2   9   4 8.68071 5.03833   1
  -3  -9  -4 601.941  62.003   4
  -3  -9  -4 620.785  60.827   1
  -3  -9  -4 667.731  55.165   1
  -3  -9  -4 684.601  58.136   7
   3   9   4 649.467  40.002   1
   3   9   4 661.656  80.319   5
   3   9   4 619.764  76.642   1
   3   9   4 644.886  46.302   4
   3   9   4 671.990  60.290   3
  -4  -9  -4 0.00000 1.21883   1
  -4  -9  -4 2.69781 2.54709   1
   4   9   4 -2.8355  5.2214   3
   4   9   4 -2.0028  2.4856   1
   4   9   4 -0.9428  5.9076   6
   4   9   4 0.03878 2.19891   1
   4   9   4 5.12656 5.81908   4
  -5  -9  -4 56.7742  4.7338   1
   5   9   4 50.2799 11.8373   3
   5   9   4 58.8436  9.5549   6
   6   9   4 183.034  20.809   3
   6   9   4 220.991  25.363   6
   7   9   4 13.3467  9.3963   6
   7   9   4 19.8917  9.1607   2
   7   9   4 32.9089 13.3239   3
   8   9   4 10.2565 13.4960   2
   6 -10  -4 18.2984 10.4757   1
  -6  10   4  8.5476 10.5860   1
   5 -10  -4 147.875  19.058   1
  -5  10   4 170.423  24.934   1
   4 -10  -4 23.3351 10.5209   1
   4 -10  -4 33.0864 10.7571   1
  -4  10   4 15.1142  6.3946   5
  -4  10   4 32.1447  8.8744   1
   3 -10  -4 -4.0225  7.7531   1
   3 -10  -4 1.40260 7.55551   1
  -3  10   4 7.83671 9.59451   1
  -3  10   4 0.49989 7.10520   5
   2 -10  -4 35.7628  7.9313   1
   2 -10  -4 32.6575 34.0183   7
   2 -10  -4 29.7026  9.0693   1
  -2  10   4 24.4880 10.6597   5
   1 -10  -4 203.172  63.323   7
   1 -10  -4 225.109  21.817   1
   1 -10  -4 186.572  21.172   1
  -1  10   4 198.185  26.785   1
  -1  10   4 232.157  27.133   5
   0 -10  -4 39.9181  8.4346   1
   0 -10  -4 29.1112  5.4646   7
   0 -10  -4 23.2548  5.3801   1
   0  10   4 19.4378  6.4959   1
   0  10   4 14.0122  6.3867   1
   0  10   4 25.7424 11.6417   5
  -1 -10  -4 120.746  14.761   7
  -1 -10  -4 93.8473 10.5017   1
  -1 -10  -4 116.666  11.138   1
   1  10   4 92.8635 10.7792   1
   1  10   4 92.2014 17.9585   5
   1  10   4 112.937  17.491   1
  -2 -10  -4 66.3592 12.9849   7
  -2 -10  -4 78.4021 10.0525   1
  -2 -10  -4 64.5584  8.8197   1
   2  10   4 64.1053  8.9595   3
   2  10   4 81.6543 10.5253   1
   2  10   4 65.4631  8.4305   1
  -3 -10  -4 22.1861  4.9745   1
  -3 -10  -4 28.8346  6.6670   1
   3  10   4 13.2202  4.0022   1
   3  10   4 13.5500  8.0343   3
  -4 -10  -4 5.66040 3.02262   1
   4  10   4 3.88358 3.32621   1
   4  10   4 -10.473  10.139   6
   4  10   4 -0.5385  6.7429   3
  -5 -10  -4 6.11179 1.57588   1
   5  10   4 25.1900 11.0448   3
   5  10   4 10.9852 12.2164   6
   6  10   4 45.1080 14.8185   6
   6  10   4 41.1980 14.1497   3
   5 -11  -4 16.5160  8.7123   1
  -5  11   4 11.8136  9.1020   1
   4 -11  -4 23.0793  7.8170   1
  -4  11   4 15.3496 10.6190   1
   3 -11  -4 48.1542 13.5707   1
   3 -11  -4 58.5832 11.1679   7
   3 -11  -4 49.5253 21.9218   1
  -3  11   4 37.4831 12.5155   5
  -3  11   4 59.5683 16.4553   1
   2 -11  -4 0.89774 7.33619   7
   2 -11  -4 11.2119  5.7405   1
  -2  11   4 -2.5506  9.1269   5
  -2  11   4 4.99595 8.40208   1
   1 -11  -4 20.4097  6.7928   1
   1 -11  -4 9.19331 9.18478   7
  -1  11   4 15.9853  6.1484   1
   0 -11  -4 267.991  33.675   7
   0 -11  -4 259.738  25.631   1
   0  11   4 258.576  33.369   1
  -1 -11  -4 167.132  22.932   7
  -1 -11  -4 149.739  17.715   1
  -2 -11  -4 45.1343 10.9558   7
  -2 -11  -4 31.6724  6.1060   1
   2  11   4 27.6250  6.8577   3
  -3 -11  -4 386.583  37.361   1
   3  11   4 342.636  59.971   3
  -4 -11  -4 15.2478  3.8725   1
   4  11   4 4.99544 9.05675   3
   4  11   4 18.3121 10.2845   6
   2 -12  -4 8.34010 6.86449   1
   2 -12  -4 10.9000  8.7280   7
   1 -12  -4 83.4128 12.0687   7
   1 -12  -4 72.0113 16.3159   1
   0 -12  -4 0.93729 5.12075   1
   0 -12  -4 -0.1445  6.8645   7
  -1 -12  -4 36.9828 12.2157   7
  -1 -12  -4 35.4448  8.9847   1
  -2 -12  -4 -0.3972  3.5125   1
   0   8  -5 33.3859 10.9641   6
   0   8  -5 45.6626 11.4807   1
   0  -8   5 27.2920  8.6006   1
  -1   8  -5 38.2449 11.5240   1
  -1   8  -5 57.5233 12.7541   6
   1  -8   5 43.9304 10.4829   1
  -2   8  -5 60.0158 10.6192   6
  -2   8  -5 102.242  16.704   1
   2  -8   5 49.7538 13.2713   7
   2  -8   5 89.6898 16.2350   1
  -3   8  -5 0.85413 5.98640   6
  -3   8  -5  6.4264 10.7883   1
   3  -8   5 2.33020 7.51050   7
   3  -8   5 6.02526 7.47231   1
  -4   8  -5 24.0360  9.5599   1
  -4   8  -5 3.74710 8.44271   6
   4  -8   5 3.20423 8.17950   1
   4  -8   5 1.88855 5.99680   7
  -5   8  -5 109.623  22.206   1
   5  -8   5 86.2755 14.2244   7
   5  -8   5 125.374  18.902   1
  -6   8  -5 69.0571 18.0406   1
   6  -8   5 56.9567 12.2380   7
   6  -8   5 55.4957 13.7990   1
   2   7  -5 2.34189 8.63440   1
   2   7  -5 -5.9027  6.9483   6
  -2  -7   5 -5.8660  6.4648   1
   1   7  -5 -11.754   9.430   1
   1   7  -5 0.38815 6.33230   6
  -1  -7   5 -1.3943  6.2869   1
   0   7  -5 767.764  58.809   6
   0   7  -5 677.340  70.625   1
   0  -7   5 712.292  61.290   1
   0  -7   5 682.336  55.774   1
  -1   7  -5 -6.5482 11.0356   1
  -1   7  -5 -0.1945  4.9569   6
   1  -7   5 -6.1477  8.1784   1
   1  -7   5 -8.8138  9.3957   1
  -2   7  -5 7.66014 7.53483   1
  -2   7  -5 7.38368 5.69244   6
   2  -7   5 13.0096  6.5695   1
   2  -7   5 7.84267 4.40803   7
  -3   7  -5 30.4437  8.9581   1
  -3   7  -5 28.4018  6.5537   6
   3  -7   5 31.5481  6.0805   7
   3  -7   5 40.2447 12.4921   1
  -4   7  -5 5.60529 6.32660   6
  -4   7  -5 7.99006 9.08883   1
   4  -7   5 14.6979  4.5978   7
   4  -7   5 3.61424 6.66647   1
  -5   7  -5 91.4927 13.6665   1
   5  -7   5 94.7166 12.4068   1
   5  -7   5 85.4214 12.6455   7
  -6   7  -5 38.5363  9.8908   1
   6  -7   5 49.0518 11.2039   1
  -7   7  -5 146.687  20.313   1
   7  -7   5 144.739  21.906   1
  -8   7  -5 13.1321 12.4015   1
   8  -7   5 12.8376 11.9509   1
  -4  -6   5 20.6494 12.1295   1
   3   6  -5 26.6543  9.6682   1
  -3  -6   5 30.3218  8.3011   1
   2   6  -5 48.0763 11.6178   6
   2   6  -5 22.5853  8.4521   1
  -2  -6   5 13.8961  9.0030   4
  -2  -6   5 19.8695  9.1287   1
  -2  -6   5 10.3879  6.6579   1
   1   6  -5 13.3090  6.4312   6
   1   6  -5 11.8214  9.9048   1
  -1  -6   5 3.57619 8.26414   1
  -1  -6   5 9.44114 7.98247   1
   0   6  -5 24.0048  7.4467   6
   0   6  -5 17.6643  7.2627   1
   0  -6   5 70.9662 16.9456   1
   0  -6   5 24.7735  8.0176   1
  -1   6  -5 20.5658  5.9943   6
   1  -6   5 23.2103  8.2561   1
   1  -6   5 7.26629 6.56877   1
  -2   6  -5 99.9970 12.8484   6
  -2   6  -5 86.8401 12.9693   1
   2  -6   5 72.8637 15.6538   1
   2  -6   5 70.2684 10.8297   1
   2  -6   5 74.4467 10.0487   7
  -3   6  -5 15.2636  6.3772   6
  -3   6  -5 -8.8078  8.6768   1
   3  -6   5 1.25445 8.15238   1
   3  -6   5 1.41365 6.64378   1
   3  -6   5 5.62566 3.18379   7
  -4   6  -5 33.9829  7.2703   1
  -4   6  -5 29.0597  4.2056   3
   4  -6   5 24.9278  6.5277   7
   4  -6   5 5.82010 9.74069   1
   4  -6   5 20.7737  7.6145   1
  -5   6  -5 -4.9012  5.3140   1
   5  -6   5 4.49854 6.77264   1
  -6   6  -5 8.58188 6.92383   1
   6  -6   5 2.66582 5.50666   1
  -7   6  -5 -13.170   9.702   1
   7  -6   5 -2.9805  8.6846   1
  -8   6  -5 0.99911 6.75530   1
   8  -6   5 -0.5061  8.0134   1
  -9   6  -5 15.9655  9.5147   1
   9  -6   5 23.5067 10.1179   1
  -5  -5   5 56.6075 11.6396   1
   4   5  -5 27.2394  8.1182   1
   4   5  -5 26.2443  8.7171   7
  -4  -5   5 18.6432  6.9453   1
   3   5  -5 36.2023 11.0063   1
   3   5  -5 45.7585  8.0716   7
  -3  -5   5 39.6420 14.6341   1
  -3  -5   5 52.4496  8.6988   4
  -3  -5   5 75.4714 11.7676   1
   2   5  -5 105.021  13.213   1
   2   5  -5 136.683  14.967   6
  -2  -5   5 151.978  16.320   4
  -2  -5   5 155.498  15.967   1
  -2  -5   5 120.248  16.534   1
   1   5  -5 1326.51   92.05   1
   1   5  -5 1178.16   91.34   6
  -1  -5   5 1237.70   88.40   1
  -1  -5   5 1278.53  117.33   1
   0   5  -5 89.3143 13.7436   1
   0   5  -5 104.071  13.758   1
   0   5  -5 117.958  12.664   6
   0  -5   5 97.7101 15.6280   1
   0  -5   5 106.041  11.181   1
  -1   5  -5 1001.70   73.52   1
  -1   5  -5 966.703  78.184   1
  -1   5  -5 1021.29  100.06   6
   1  -5   5 964.556  65.243   1
   1  -5   5 918.227  82.618   1
  -2   5  -5 289.481  28.229   1
  -2   5  -5 268.005  23.876   6
  -2   5  -5 281.240  24.489   1
   2  -5   5 279.454  20.451   7
   2  -5   5 304.783  31.060   1
   2  -5   5 289.109  27.979   1
  -3   5  -5 51.8837 10.8833   1
  -3   5  -5 43.0370  7.8872   1
  -3   5  -5 49.9178  6.2553   6
   3  -5   5 56.8500  6.3945   7
   3  -5   5 47.0733 13.8069   1
   3  -5   5 53.6398  9.7264   1
  -4   5  -5 832.090  85.858   1
  -4   5  -5 827.660  83.147   3
  -4   5  -5 754.391  76.479   1
   4  -5   5 831.382  65.183   1
   4  -5   5 843.593  78.965   1
   4  -5   5 799.419  83.125   7
  -5   5  -5 257.955  23.971   1
  -5   5  -5 257.608  26.039   3
  -5   5  -5 267.414  20.052   1
   5  -5   5 270.592  29.549   1
   5  -5   5 296.635  31.467   1
  -6   5  -5 -4.5756  6.6453   1
  -6   5  -5 9.14353 6.36386   1
   6  -5   5 7.29809 5.13283   1
  -7   5  -5 77.5042 13.5639   1
  -7   5  -5 94.7074 16.4332   1
   7  -5   5 126.052  12.763   1
  -8   5  -5 44.8929 10.2394   1
  -8   5  -5 15.1314 10.5999   1
   8  -5   5 30.5095  8.5252   1
  -9   5  -5 0.14898 5.93151   1
   9  -5   5 -8.2332  6.4634   1
 -10   5  -5 20.3918 10.1136   5
 -10   5  -5  9.1816 10.7512   1
  10  -5   5  7.9747 14.1872   1
  -6  -4   5 27.0054 13.6118   1
   5   4  -5 132.805  23.554   7
   5   4  -5 159.487  21.460   1
  -5  -4   5 135.644  21.307   1
  -5  -4   5 176.509  18.007   1
   4   4  -5 99.4256 12.6961   7
   4   4  -5 85.9481 11.0391   1
  -4  -4   5 77.5670 13.6249   1
  -4  -4   5 94.2143 14.8729   1
  -4  -4   5 75.0504 10.4965   4
   3   4  -5 252.517  26.732   1
   3   4  -5 265.074  28.091   7
  -3  -4   5 255.209  32.293   1
  -3  -4   5 267.041  17.718   1
   2   4  -5 -0.9388  4.8071   7
   2   4  -5 7.24481 4.62591   1
   2   4  -5 -2.2805  8.9582   1
  -2  -4   5 3.79325 7.15954   1
  -2  -4   5 3.63482 3.99212   1
   1   4  -5 43.0879  8.0580   1
   1   4  -5 35.6919  6.5862   6
   1   4  -5 43.2731  8.1828   1
  -1  -4   5 37.0260  8.5494   1
  -1  -4   5 38.4748  9.7826   1
   0   4  -5 253.054  18.311   6
   0   4  -5 215.159  20.859   1
   0   4  -5 203.407  18.701   1
   0  -4   5 225.010  19.748   1
   0  -4   5 178.800  15.721   1
  -1   4  -5 348.644  22.888   1
  -1   4  -5 281.728  20.230   6
  -1   4  -5 348.297  25.444   1
   1  -4   5 337.132  24.393   1
   1  -4   5 364.977  36.595   1
  -2   4  -5 22.1999  6.7538   1
  -2   4  -5 41.9064  5.8879   6
  -2   4  -5 38.4644  8.4886   1
   2  -4   5 32.8928  6.5895   1
   2  -4   5 40.5858  4.7750   7
   2  -4   5 22.4797  5.4449   1
  -3   4  -5 9.29983 4.71807   1
  -3   4  -5 11.9953  3.5051   6
  -3   4  -5 18.8236  7.3987   1
   3  -4   5 16.1269  7.4056   1
   3  -4   5 12.7679  3.9712   7
   3  -4   5 11.8667  5.2497   1
  -4   4  -5 134.752  14.506   1
  -4   4  -5 136.157  16.428   1
  -4   4  -5 114.421  12.691   3
   4  -4   5 113.757  15.428   1
   4  -4   5 130.081  13.388   1
  -5   4  -5 146.512  13.619   1
  -5   4  -5 133.118  11.730   3
  -5   4  -5 127.923  14.335   1
   5  -4   5 129.431  13.242   1
   5  -4   5 121.893  14.419   1
  -6   4  -5 262.045  24.418   1
  -6   4  -5 245.142  21.912   1
   6  -4   5 236.976  20.278   1
  -7   4  -5 33.4406  7.1888   1
  -7   4  -5 43.4132  9.8288   1
   7  -4   5 42.1534  9.6194   1
   7  -4   5 19.1812  9.3693   1
  -8   4  -5 8.73856 8.10773   1
  -8   4  -5 0.52106 4.82983   1
   8  -4   5 -4.0550  5.5860   1
  -9   4  -5 184.407  14.752   1
  -9   4  -5 180.190  26.147   1
   9  -4   5 200.282  25.743   1
 -10   4  -5 -5.9222  8.1599   1
 -10   4  -5 0.29903 9.09704   1
 -10   4  -5 7.82013 6.22494   5
  10  -4   5  3.1857 10.9111   1
  11  -4   5 50.3280 13.1030   1
   6   3  -5 96.8402 15.2469   1
  -6  -3   5 135.176  20.692   1
   5   3  -5 144.271  20.052   7
  -5  -3   5 160.959  18.933   1
  -5  -3   5 166.483  19.854   4
  -5  -3   5 122.837  21.110   1
   4   3  -5 59.7631 11.9419   7
   4   3  -5 37.9346 10.4710   1
  -4  -3   5 60.3149  8.7645   4
  -4  -3   5 53.5759 11.1109   1
  -4  -3   5 58.4449 10.1984   1
  -4  -3   5 54.5664  9.0877   6
   3   3  -5 777.662  67.026   7
   3   3  -5 608.374  57.206   1
   3   3  -5 758.578  61.149   1
  -3  -3   5 716.216  42.687   1
  -3  -3   5 762.411  71.309   1
  -3  -3   5 638.518  91.216   6
   2   3  -5 6.09897 5.23520   1
   2   3  -5 1.70352 3.17873   7
   2   3  -5 2.06892 4.10208   1
  -2  -3   5 2.69420 3.98479   1
  -2  -3   5 -0.5083  4.4651   1
   1   3  -5 59.2745  7.5159   1
   1   3  -5 30.8452  6.9623   1
   1   3  -5 41.6798  5.2278   7
  -1  -3   5 32.4622  8.0851   1
  -1  -3   5 38.7989  6.1394   1
   0   3  -5 2.01435 4.45831   1
   0   3  -5 10.2921  3.8947   6
   0   3  -5 -3.2019  5.9516   1
   0  -3   5 7.72858 7.46582   1
   0  -3   5 7.07725 4.47168   1
  -1   3  -5 3.26434 4.26852   1
  -1   3  -5 5.02679 3.90188   6
  -1   3  -5 3.35869 5.02863   1
   1  -3   5 -1.7718  4.2453   1
   1  -3   5 2.48823 5.10123   1
  -2   3  -5 17.9671  5.2603   1
  -2   3  -5 45.9700  6.5768   1
  -2   3  -5 34.3311  4.1951   6
   2  -3   5 25.4377  4.9908   1
   2  -3   5 32.1872  5.0078   7
   2  -3   5 41.3596  6.7687   1
  -3   3  -5 1242.29  104.34   6
  -3   3  -5 1164.25   60.44   1
  -3   3  -5 1295.50   80.28   1
   3  -3   5 1297.14  101.47   7
   3  -3   5 1240.90   84.02   1
   3  -3   5 1184.58   60.51   1
  -4   3  -5 277.235  18.249   1
  -4   3  -5 336.105  15.529   3
  -4   3  -5 324.337  21.586   1
   4  -3   5 279.329  16.722   1
   4  -3   5 321.832  27.892   1
  -5   3  -5 646.933  45.262   1
  -5   3  -5 688.268  36.529   1
  -5   3  -5 612.411  36.050   3
   5  -3   5 572.000  37.205   1
   5  -3   5 610.165  46.078   1
  -6   3  -5 2326.38  131.43   1
  -6   3  -5 2144.99  135.05   1
   6  -3   5 2239.74  192.88   1
   6  -3   5 2121.86  141.61   1
  -7   3  -5 614.883  71.563   1
  -7   3  -5 629.918  47.025   1
   7  -3   5 574.291  41.725   1
   7  -3   5 673.402  59.151   1
  -8   3  -5 52.6405  9.3703   1
  -8   3  -5 32.1869  8.0073   1
   8  -3   5 32.9664  7.1644   1
   8  -3   5 24.1093  7.8549   1
  -9   3  -5 72.4427 11.2397   1
  -9   3  -5 82.3061 11.9754   1
  -9   3  -5 83.1753  8.6097   5
   9  -3   5 83.0833 12.1712   1
 -10   3  -5 23.6800  8.6959   1
 -10   3  -5 24.0245  7.4042   5
 -10   3  -5 10.5422  7.9782   1
  10  -3   5 14.3056 10.1900   1
 -11   3  -5 7.65309 8.51877   1
 -11   3  -5 6.55563 4.81569   5
  11  -3   5 0.22195 6.61113   1
   7   2  -5 -5.9888  8.1498   1
   7   2  -5 11.1919  6.4104   2
  -7  -2   5 2.82676 9.11844   1
   6   2  -5 44.1891  9.1956   1
  -6  -2   5 25.5628  7.5587   1
  -6  -2   5 32.5000  8.9769   1
   5   2  -5 28.6069 12.4137   1
  -5  -2   5 33.5800  4.2896   4
  -5  -2   5 36.4166  8.3807   1
  -5  -2   5 34.1879  8.7064   1
   4   2  -5 176.626  23.791   1
   4   2  -5 212.005  19.565   1
   4   2  -5 197.468  25.666   7
  -4  -2   5 185.974  22.940   1
  -4  -2   5 214.827  15.300   1
  -4  -2   5 175.874  24.554   6
   3   2  -5 35.6400  5.3167   7
   3   2  -5 31.0623  7.9361   1
   3   2  -5 33.8217  6.9258   1
  -3  -2   5 35.1630  6.8169   1
  -3  -2   5 25.9330  7.2027   6
  -3  -2   5 39.7968  7.8800   1
   2   2  -5 576.102  39.460   7
   2   2  -5 624.003  57.544   1
   2   2  -5 623.277  33.789   1
  -2  -2   5 611.797  24.655   1
  -2  -2   5 620.104  54.090   6
  -2  -2   5 663.185  48.080   1
   1   2  -5 355.096  28.883   1
   1   2  -5 360.379  22.369   1
   1   2  -5 373.437  23.212   7
  -1  -2   5 344.587  17.836   1
  -1  -2   5 326.355  32.137   6
  -1  -2   5 358.194  28.619   1
   0   2  -5 3.49032 4.77002   1
   0   2  -5 -3.1912  4.0723   1
   0  -2   5 0.44193 3.79069   1
   0  -2   5 3.92005 5.24786   1
  -1   2  -5 18.4471  5.5344   1
  -1   2  -5 13.9750  4.3254   1
  -1   2  -5 26.0854  3.5125   6
   1  -2   5 22.3212  6.1855   1
   1  -2   5 14.8915  5.1761   1
  -2   2  -5 29.9891  5.1633   1
  -2   2  -5 26.2149  3.1595   6
  -2   2  -5 31.9917  4.9601   1
   2  -2   5 16.1596  4.4627   1
   2  -2   5 21.2001  4.4080   1
   2  -2   5 20.2328  2.7846   7
  -3   2  -5 145.308  12.706   1
  -3   2  -5 179.957  10.994   6
  -3   2  -5 148.906   9.567   1
   3  -2   5 148.073  10.973   1
   3  -2   5 146.991  11.528   1
  -4   2  -5 604.506  26.881   3
  -4   2  -5 579.856  33.242   1
  -4   2  -5 600.998  33.539   1
   4  -2   5 620.092  32.679   1
   4  -2   5 624.746  49.190   1
  -5   2  -5 1463.25   52.49   1
  -5   2  -5 1477.20   72.86   1
  -5   2  -5 1402.67   84.05   3
   5  -2   5 1527.21   95.57   1
   5  -2   5 1530.79   88.19   1
  -6   2  -5 126.621  13.337   1
  -6   2  -5 140.838  10.592   1
   6  -2   5 147.246  14.857   1
   6  -2   5 136.308  16.944   1
  -7   2  -5 14.1223  5.2768   1
  -7   2  -5 18.5005  5.0858   1
   7  -2   5 6.16631 4.37092   1
   7  -2   5 12.0877  5.5033   1
  -8   2  -5 401.502  40.415   1
  -8   2  -5 384.375  34.555   1
  -8   2  -5 413.726  29.408   5
  -8   2  -5 402.617  33.353   2
   8  -2   5 385.475  49.344   1
   8  -2   5 417.705  41.017   1
  -9   2  -5 54.0161  8.9739   1
  -9   2  -5 42.5125 10.4353   2
  -9   2  -5 44.2539  9.0245   6
  -9   2  -5 76.8053 11.3244   1
  -9   2  -5 52.2109  7.5743   5
   9  -2   5 52.5197  7.9609   3
   9  -2   5 51.8408  9.8217   1
 -10   2  -5 76.6739 10.8477   5
 -10   2  -5 44.9475  9.5989   6
 -10   2  -5 42.2834 11.8230   1
 -10   2  -5 67.4284  9.9847   1
  10  -2   5 61.4249  9.9189   1
  10  -2   5 59.3252  8.3633   3
 -11   2  -5 -5.1584  7.4015   1
 -11   2  -5 -1.0596  3.4305   5
 -11   2  -5  2.8244 10.2594   6
  11  -2   5 4.13072 4.74476   3
  11  -2   5 5.94623 9.34227   1
 -12   2  -5  7.3579 10.5311   1
  12  -2   5 6.75001 8.44996   3
   8   1  -5 14.3661 10.5227   1
  -8  -1   5 26.2482  9.0346   1
   7   1  -5 -1.0936  5.8161   1
   7   1  -5 5.13301 6.57946   2
  -7  -1   5 0.62161 7.71166   1
  -7  -1   5 -1.7165  5.2336   1
   6   1  -5 167.863  14.749   1
  -6  -1   5 178.447  17.788   1
  -6  -1   5 148.116  17.974   1
   5   1  -5 26.7292  6.7915   1
  -5  -1   5 16.8596  7.6023   6
  -5  -1   5 35.2491  9.9912   1
  -5  -1   5 32.3912  4.2589   4
  -5  -1   5 36.6804  6.9869   1
   4   1  -5 108.923  13.770   1
  -4  -1   5 143.316  17.185   1
  -4  -1   5 112.731  20.450   6
  -4  -1   5 116.294  14.505   1
   3   1  -5 360.197  24.256   1
   3   1  -5 318.921  32.162   1
  -3  -1   5 343.072  30.581   6
  -3  -1   5 319.516  25.375   1
  -3  -1   5 300.226  20.997   1
   2   1  -5 379.732  24.175   1
   2   1  -5 335.071  17.493   1
  -2  -1   5 404.216  34.875   6
  -2  -1   5 394.290  21.141   1
  -2  -1   5 391.751  28.336   1
   1   1  -5 206.011  13.405   7
   1   1  -5 188.741  14.443   1
   1   1  -5 171.019  11.952   1
  -1  -1   5 151.611  10.866   1
  -1  -1   5 196.039  14.946   1
  -1  -1   5 175.729  16.244   6
   0   1  -5 1319.69   62.21   7
   0   1  -5 1341.02   63.15   1
   0   1  -5 1262.23   47.30   1
   0  -1   5 1332.24   63.07   6
   0  -1   5 1280.05   62.81   1
   0  -1   5 1297.01   67.79   1
  -1   1  -5 9.48516 4.11814   1
  -1   1  -5 4.05358 3.77252   1
   1  -1   5 2.33548 2.64100   1
   1  -1   5 -0.0377  2.3824   1
  -2   1  -5 1383.98   54.30   1
  -2   1  -5 1283.84   62.44   1
   2  -1   5 1357.86   76.68   7
   2  -1   5 1363.53   55.79   1
   2  -1   5 1417.68   43.72   1
  -3   1  -5 32.6467  4.9450   1
  -3   1  -5 47.4995  6.0973   1
   3  -1   5 32.6158  5.7798   1
  -4   1  -5 974.699  38.805   1
  -4   1  -5 967.711  42.098   3
  -4   1  -5 1060.95   46.57   1
   4  -1   5 999.921  47.493   1
   4  -1   5 948.435  53.945   1
  -5   1  -5 1144.01   80.12   1
  -5   1  -5 1106.60   53.42   3
  -5   1  -5 1138.17   51.66   1
   5  -1   5 1181.81   57.74   1
   5  -1   5 1192.94   58.36   1
  -6   1  -5 10.7943  3.6995   1
  -6   1  -5 12.4575  4.5128   1
   6  -1   5 12.1134  3.8814   1
   6  -1   5 9.66519 3.92236   1
  -7   1  -5 85.4088 11.4322   2
  -7   1  -5 92.3712 12.7771   1
  -7   1  -5 105.518   9.390   5
  -7   1  -5 89.8917 11.7379   1
  -7   1  -5 94.4217  9.2818   6
   7  -1   5 89.5376 11.2615   3
   7  -1   5 93.0440 10.7971   1
   7  -1   5 110.879  10.922   1
  -8   1  -5 11.6859  4.0772   1
  -8   1  -5 16.1626  2.9101   6
  -8   1  -5 25.7648  7.4042   1
  -8   1  -5 9.40771 5.73641   2
  -8   1  -5 20.2000  5.0076   5
   8  -1   5 9.83962 4.72016   3
   8  -1   5 10.8858  5.7879   1
   8  -1   5 18.5711  6.0185   1
  -9   1  -5 206.946  22.751   6
  -9   1  -5 187.204  17.776   1
  -9   1  -5 214.354  19.513   1
  -9   1  -5 161.828  17.360   5
  -9   1  -5 170.958  15.596   2
   9  -1   5 180.191  14.589   1
   9  -1   5 191.656  21.473   3
   9  -1   5 176.601  16.402   1
 -10   1  -5 30.8305  8.8967   1
 -10   1  -5 41.8759  7.9270   6
 -10   1  -5 29.7970  7.0290   5
  10  -1   5 39.8901  8.3737   3
  10  -1   5 33.0458  7.5907   1
 -11   1  -5 34.9685  6.4495   1
 -11   1  -5 13.3204  6.8960   5
 -11   1  -5 20.5976  6.6417   6
  11  -1   5 20.7649  8.3971   3
  11  -1   5 25.8619  7.0655   1
 -12   1  -5 27.5099  7.8025   1
  12  -1   5 5.67820 8.65433   3
   8   0  -5 17.6687 10.3068   1
  -8   0   5 26.8132  8.7300   1
   7   0  -5 27.6488  6.7017   2
   7   0  -5 39.6194 10.4973   1
  -7   0   5 26.7217  7.8261   1
  -7   0   5 18.9926  8.3862   1
   6   0  -5 2.26244 3.57358   2
   6   0  -5 4.71634 5.54493   1
  -6   0   5 -0.2530  8.5300   1
  -6   0   5 -0.1796  5.1208   1
   5   0  -5 22.8274  7.4587   1
   5   0  -5 2.13755 5.98268   1
  -5   0   5 9.63576 6.34231   6
  -5   0   5 17.8824  8.6028   1
  -5   0   5 6.83920 5.50102   1
   4   0  -5 95.0784 15.5067   1
   4   0  -5 142.948  13.399   1
  -4   0   5 96.1062 12.4843   1
  -4   0   5 93.0482 14.1500   6
  -4   0   5 117.346  14.598   1
   3   0  -5 77.1490  9.3140   1
   3   0  -5 68.0407  7.9628   1
  -3   0   5 63.4427  8.4333   1
  -3   0   5 74.5568 10.1075   6
  -3   0   5 81.0860 11.1889   1
   2   0  -5 154.042   9.946   1
   2   0  -5 132.013  11.578   1
  -2   0   5 125.861  10.316   1
  -2   0   5 168.658  12.739   1
  -2   0   5 141.338  13.162   6
   1   0  -5 1291.35   48.08   1
   1   0  -5 1233.15   36.07   1
  -1   0   5 1319.34   59.26   1
  -1   0   5 1192.03   44.81   1
  -1   0   5 1162.55   51.98   6
   0   0  -5 -0.6962  2.3965   1
   0   0  -5 -0.0815  0.5580   7
   0   0  -5 -0.5489  2.8235   1
   0   0   5 0.28189 4.17071   1
   0   0   5 -0.0095  2.2584   6
   0   0   5 5.18857 3.27046   1
  -1   0  -5 1653.33   62.57   1
  -1   0  -5 1569.18   58.24   1
   1   0   5 1637.57   55.43   1
   1   0   5 1579.94   84.74   1
   1   0   5 1538.17   60.46   6
  -2   0  -5 970.494  38.028   1
  -2   0  -5 993.468  43.008   1
   2   0   5 901.407  45.052   1
   2   0   5 948.552  67.871   1
  -3   0  -5 346.559  28.374   1
  -3   0  -5 306.756  13.153   3
  -3   0  -5 327.129  21.707   1
   3   0   5 353.674  17.732   1
   3   0   5 334.032  20.372   1
  -4   0  -5 5306.85  178.18   1
  -4   0  -5 5375.02  283.55   1
  -4   0  -5 5353.74  223.11   3
   4   0   5 5463.38  187.07   1
   4   0   5 5328.14  168.36   1
  -5   0  -5 -1.3343  2.6955   3
  -5   0  -5 0.80706 3.44792   1
  -5   0  -5 0.79490 1.07911   6
  -5   0  -5 -1.3700  2.7143   1
   5   0   5 -0.0474  2.4090   1
   5   0   5 1.61830 2.55191   1
  -6   0  -5 68.1033  7.1081   5
  -6   0  -5 46.1448  7.5577   2
  -6   0  -5 51.7651  6.4534   1
  -6   0  -5 66.9562  7.5768   6
  -6   0  -5 63.9645  7.7335   1
   6   0   5 54.9039  5.2676   3
   6   0   5 58.5388  5.2386   1
   6   0   5 66.4545  7.4508   1
  -7   0  -5 170.121  11.803   5
  -7   0  -5 181.540  13.978   1
  -7   0  -5 185.932  16.878   6
  -7   0  -5 185.653  18.016   1
  -7   0  -5 189.791  17.487   2
   7   0   5 185.488  21.195   1
   7   0   5 194.203  12.020   3
   7   0   5 200.859  15.012   1
  -8   0  -5 46.0687  8.7014   2
  -8   0  -5 35.3554  5.8965   1
  -8   0  -5 45.5846  5.1814   6
  -8   0  -5 53.6001  6.7938   5
  -8   0  -5 44.7910  6.1250   1
   8   0   5 29.9757  6.4348   1
   8   0   5 30.0350  5.7973   1
   8   0   5 39.1581  7.0415   3
  -9   0  -5 466.045  28.964   5
  -9   0  -5 434.160  45.609   1
  -9   0  -5 489.596  32.446   1
  -9   0  -5 451.219  39.239   2
  -9   0  -5 439.083  52.826   6
   9   0   5 473.367  39.585   1
   9   0   5 441.843  35.082   3
   9   0   5 460.457  46.024   1
 -10   0  -5 437.434  58.093   6
 -10   0  -5 493.153  45.575   1
 -10   0  -5 447.301  47.780   5
 -10   0  -5 511.409  36.639   1
  10   0   5 437.273  40.285   3
  10   0   5 464.833  39.554   1
  10   0   5 384.462  27.898   1
 -11   0  -5 49.6779 12.8940   6
 -11   0  -5 60.8582 10.1104   1
  11   0   5 69.5647 13.2117   3
 -12   0  -5 13.7896  6.8834   1
  12   0   5  8.0123 10.4917   3
   8  -1  -5 -11.485   7.022   1
  -8   1   5 2.41940 7.18778   1
   7  -1  -5 -11.444   8.328   1
  -7   1   5 13.7893  9.0966   1
  -7   1   5  2.0916 11.8377   1
   6  -1  -5 464.537  41.005   1
   6  -1  -5 444.302  30.963   2
  -6   1   5 377.473  46.132   6
  -6   1   5 403.461  43.809   1
  -6   1   5 428.840  41.177   1
   5  -1  -5 420.521  44.381   1
   5  -1  -5 452.765  39.485   2
   5  -1  -5 413.165  34.638   1
  -5   1   5 406.518  43.948   4
  -5   1   5 411.711  37.813   1
  -5   1   5 405.503  44.534   1
  -5   1   5 473.884  55.409   6
   4  -1  -5 44.0530  6.4480   1
   4  -1  -5 22.7910  5.9570   1
  -4   1   5 31.9177  6.3419   1
  -4   1   5 15.0682  4.7147   6
   3  -1  -5 609.764  36.955   1
   3  -1  -5 606.299  31.843   1
  -3   1   5 612.788  20.890   1
  -3   1   5 622.671  52.599   1
   2  -1  -5 230.157  16.171   1
   2  -1  -5 274.000  18.762   1
  -2   1   5 234.854  15.566   1
  -2   1   5 239.035  18.987   1
   1  -1  -5 47.2311  5.5722   1
   1  -1  -5 58.6645  6.5141   1
  -1   1   5 62.0317  5.2860   1
  -1   1   5 52.6165  6.4996   1
   0  -1  -5 804.642  29.161   1
   0  -1  -5 820.458  36.453   1
   0   1   5 813.005  27.633   1
   0   1   5 860.826  39.462   1
  -1  -1  -5 591.313  23.765   1
  -1  -1  -5 567.222  18.614   1
   1   1   5 579.817  25.844   1
   1   1   5 586.746  23.355   1
  -2  -1  -5 76.3017  6.3465   1
  -2  -1  -5 94.8667  7.1114   1
   2   1   5 90.4446  6.7456   1
   2   1   5 73.6084  6.6635   1
  -3  -1  -5 825.508  33.671   1
  -3  -1  -5 850.965  49.071   3
  -3  -1  -5 826.729  26.634   1
   3   1   5 813.315  37.028   1
   3   1   5 805.780  35.809   1
  -4  -1  -5 2042.33   63.48   1
  -4  -1  -5 2225.36  113.56   3
  -4  -1  -5 2138.77   93.09   5
  -4  -1  -5 2284.54   87.52   1
  -4  -1  -5 2210.38   84.67   2
   4   1   5 2172.11   98.61   1
   4   1   5 2264.04  117.32   1
  -5  -1  -5 227.765  13.149   1
  -5  -1  -5 231.770  15.815   1
  -5  -1  -5 226.419  15.496   2
  -5  -1  -5 242.055  15.961   5
   5   1   5 247.990  17.747   1
   5   1   5 241.031  10.943   1
   5   1   5 217.838  15.109   3
  -6  -1  -5 163.857  14.550   5
  -6  -1  -5 149.724  12.495   2
  -6  -1  -5 152.319  10.242   6
  -6  -1  -5 149.928   9.794   1
  -6  -1  -5 148.941   9.997   1
   6   1   5 139.850  10.666   3
   6   1   5 142.159  10.506   1
   6   1   5 158.415  10.400   1
  -7  -1  -5 28.6161  4.8922   1
  -7  -1  -5 27.5143  7.3967   2
  -7  -1  -5 21.7959  3.2806   6
  -7  -1  -5 25.9925  4.1286   1
  -7  -1  -5 22.4508  4.9280   5
   7   1   5 32.3471  7.3259   3
   7   1   5 14.8597  4.3120   1
  -8  -1  -5 384.681  30.552   5
  -8  -1  -5 374.858  31.357   1
  -8  -1  -5 358.721  25.892   2
  -8  -1  -5 356.080  28.695   1
  -8  -1  -5 345.819  29.495   6
   8   1   5 377.367  27.913   3
   8   1   5 372.450  39.212   1
   8   1   5 389.069  31.313   1
  -9  -1  -5 32.3875  5.9586   6
  -9  -1  -5 23.1803  5.2182   1
  -9  -1  -5 20.8777  4.4770   1
  -9  -1  -5 12.6501  9.4991   2
  -9  -1  -5 31.8601  5.5319   5
   9   1   5 16.8818  4.3753   1
   9   1   5 16.5208  3.7409   1
   9   1   5 3.57491 7.15703   3
 -10  -1  -5 59.4708  7.0677   1
 -10  -1  -5 45.1244  8.1379   1
 -10  -1  -5 39.9178  9.4077   6
  10   1   5 35.6144  8.8502   1
  10   1   5 56.9512  8.3383   1
  10   1   5 36.3778  7.4773   3
 -11  -1  -5 43.7673  9.1353   1
 -11  -1  -5 32.4694  9.0594   6
  11   1   5 44.6670  9.5502   3
 -12  -1  -5 108.674  13.995   1
  12   1   5 120.651  18.791   3
   9  -2  -5 63.4437 14.8218   1
  -9   2   5 98.6072 19.8187   1
   8  -2  -5 81.3224 15.9824   1
  -8   2   5 87.0735 15.8465   1
   7  -2  -5 71.5485 11.9381   1
  -7   2   5 62.5204 12.1598   1
  -7   2   5 38.2243 12.8549   1
   6  -2  -5 310.245  25.406   1
  -6   2   5 347.728  26.984   1
  -6   2   5 264.648  33.709   1
   5  -2  -5 876.889  42.553   1
   5  -2  -5 909.094  57.149   1
  -5   2   5 827.758  63.289   4
  -5   2   5 945.033  70.224   1
  -5   2   5 837.499  63.718   1
   4  -2  -5 90.9522 10.4079   1
   4  -2  -5 84.3462 11.2642   1
  -4   2   5 97.0448 10.6263   1
  -4   2   5 94.0901 10.1679   1
  -4   2   5 94.5913  4.6961   4
   3  -2  -5 1095.75   43.80   2
   3  -2  -5 1234.04   48.44   1
   3  -2  -5 1316.17   99.27   1
  -3   2   5 1281.29   88.06   1
  -3   2   5 1137.99   37.12   1
   2  -2  -5 228.348  19.718   1
   2  -2  -5 206.568  15.142   1
  -2   2   5 225.862  11.498   1
  -2   2   5 255.392  14.726   1
   1  -2  -5 159.571  11.227   1
  -1   2   5 142.466  12.013   1
  -1   2   5 162.825  10.994   1
   0  -2  -5 2.58578 3.02472   1
   0  -2  -5 3.87886 1.19763   2
   0  -2  -5 3.69995 2.95420   1
   0   2   5 0.99661 2.87427   1
   0   2   5 6.76161 3.24247   1
  -1  -2  -5 922.152  31.631   1
  -1  -2  -5 888.036  43.021   1
  -1  -2  -5 856.852  35.140   7
  -1  -2  -5 918.328  27.860   2
   1   2   5 860.759  39.293   1
   1   2   5 887.574  42.365   1
  -2  -2  -5 239.337  14.217   2
  -2  -2  -5 239.981  12.328   5
  -2  -2  -5 227.408  12.853   1
  -2  -2  -5 228.359   9.464   1
  -2  -2  -5 262.623  12.864   3
   2   2   5 264.040  14.095   1
   2   2   5 227.101  14.152   1
  -3  -2  -5 454.936  22.589   5
  -3  -2  -5 495.760  28.589   3
  -3  -2  -5 434.935  20.431   1
  -3  -2  -5 466.631  18.159   1
  -3  -2  -5 467.501  26.957   2
   3   2   5 476.542  36.015   7
   3   2   5 473.510  23.720   1
   3   2   5 476.012  30.229   1
  -4  -2  -5 891.923  50.235   5
  -4  -2  -5 905.110  38.137   1
  -4  -2  -5 913.352  50.356   3
  -4  -2  -5 850.924  37.330   1
  -4  -2  -5 860.146  39.029   2
   4   2   5 893.413  59.512   6
   4   2   5 913.376  46.915   1
   4   2   5 857.443  38.748   1
   4   2   5 830.734  48.494   3
  -5  -2  -5 737.046  41.057   1
  -5  -2  -5 716.518  37.786   1
  -5  -2  -5 685.660  43.873   5
  -5  -2  -5 756.456  26.106   2
   5   2   5 723.386  43.272   1
   5   2   5 669.524  23.005   6
   5   2   5 677.870  41.034   1
   5   2   5 701.878  40.706   3
  -6  -2  -5 4.90014 4.57883   5
  -6  -2  -5 4.34872 2.74134   1
  -6  -2  -5 4.16417 3.96849   2
  -6  -2  -5 0.83228 2.46962   1
   6   2   5 -0.2617  3.2026   3
   6   2   5 -1.6855  1.9514   1
   6   2   5 2.44277 2.34077   1
  -7  -2  -5 34.2761  6.9902   5
  -7  -2  -5 23.0107  6.6678   2
  -7  -2  -5 26.1399  3.3909   1
  -7  -2  -5 33.7622  4.6318   1
   7   2   5 23.4908  3.3609   1
   7   2   5 19.4296  5.2100   3
   7   2   5 20.7164  3.9592   1
  -8  -2  -5 31.2821  4.8058   1
  -8  -2  -5 44.0918  7.1657   6
  -8  -2  -5 27.1360  6.2550   5
  -8  -2  -5 44.9048  4.9750   1
   8   2   5 35.2648  3.8534   1
   8   2   5 37.9604  7.9096   3
   8   2   5 31.1742  5.8838   1
  -9  -2  -5 107.271   9.743   1
  -9  -2  -5 104.859  11.770   1
  -9  -2  -5 96.2495 12.5839   6
   9   2   5 97.0201 12.8408   1
   9   2   5 98.3239 15.5299   3
   9   2   5 93.8148 12.1164   1
 -10  -2  -5 -7.8719  7.0600   6
 -10  -2  -5 2.58741 3.30142   1
 -10  -2  -5 -0.6586  3.0219   1
  10   2   5 0.03932 4.10372   1
  10   2   5 6.56198 3.14498   1
  10   2   5 -3.5136  5.3353   3
 -11  -2  -5 73.6160  8.8353   1
 -11  -2  -5 62.4980 10.2884   6
  11   2   5 64.2700  9.6302   4
  11   2   5 44.8885  9.9442   3
  11   2   5 48.4347  6.9232   1
 -12  -2  -5 3.53763 3.99603   1
  12   2   5 -4.7803  6.9044   3
   9  -3  -5 28.3876 11.5682   1
  -9   3   5 19.3633 13.7200   1
   8  -3  -5 67.9857 12.6451   1
  -8   3   5 66.8470 13.0021   1
   7  -3  -5 38.2797  9.3727   1
  -7   3   5 17.7475  9.4134   1
  -7   3   5 19.8163  9.7682   1
   6  -3  -5 162.438  17.784   1
   6  -3  -5 228.089  26.723   1
  -6   3   5 273.664  28.622   1
  -6   3   5 221.441  23.930   1
   5  -3  -5 2854.32  255.80   1
   5  -3  -5 2938.75  175.56   5
   5  -3  -5 2911.42  134.91   1
  -5   3   5 2769.77  274.41   1
  -5   3   5 2862.42  197.80   4
  -5   3   5 2794.28  221.39   1
   4  -3  -5 100.742   6.405   5
   4  -3  -5 88.4084 11.4694   1
   4  -3  -5 105.100  11.441   1
  -4   3   5 95.3949  8.4612   4
  -4   3   5 92.7598 13.1769   1
  -4   3   5 122.113  13.309   1
   3  -3  -5 42.4498  6.8128   1
   3  -3  -5 41.0939  7.1730   1
   3  -3  -5 47.8694  4.3092   5
  -3   3   5 36.7063  5.6298   1
  -3   3   5 34.6747  7.2042   1
  -3   3   5 47.1808  4.3703   4
   2  -3  -5 74.4685  7.8927   1
   2  -3  -5 76.7818  6.0650   5
   2  -3  -5 66.0339  6.7720   1
  -2   3   5 70.4619  6.4082   4
  -2   3   5 64.5103  7.2504   1
  -2   3   5 67.3084  8.7841   1
   1  -3  -5 455.098  21.786   5
   1  -3  -5 441.445  29.353   1
   1  -3  -5 414.608  18.516   1
  -1   3   5 457.619  20.395   1
  -1   3   5 423.691  19.646   1
   0  -3  -5 871.961  24.363   5
   0  -3  -5 837.278  31.807   1
   0  -3  -5 889.466  37.386   1
   0   3   5 860.529  43.130   1
   0   3   5 843.135  29.133   1
  -1  -3  -5 29.3082  4.4929   2
  -1  -3  -5 18.3953  2.7437   7
  -1  -3  -5 23.9968  4.8483   5
  -1  -3  -5 17.4958  3.1563   1
  -1  -3  -5 25.4763  4.0938   1
   1   3   5 10.2618  2.9629   1
   1   3   5 18.4402  3.6734   1
  -2  -3  -5 392.927  20.089   5
  -2  -3  -5 401.430  19.800   1
  -2  -3  -5 393.591  20.786   1
  -2  -3  -5 397.026  16.041   7
  -2  -3  -5 394.598  19.883   3
  -2  -3  -5 383.537  25.629   2
   2   3   5 392.502  19.409   1
   2   3   5 395.431  20.446   1
  -3  -3  -5 49.3067  5.7367   2
  -3  -3  -5 50.6276  4.5044   1
  -3  -3  -5 65.8340  5.3701   1
  -3  -3  -5 68.3571  6.4387   3
  -3  -3  -5 60.6507  6.6390   5
   3   3   5 59.3599  5.6526   2
   3   3   5 55.7065  5.3838   7
   3   3   5 64.0277  5.7140   1
   3   3   5 60.1304  5.5051   1
  -4  -3  -5 63.7673 10.0137   2
  -4  -3  -5 51.3731  6.5954   5
  -4  -3  -5 62.5858  6.3752   3
  -4  -3  -5 61.6441  5.0962   1
   4   3   5 61.3228  7.1959   3
   4   3   5 61.4837  4.3602   1
   4   3   5 61.2651  4.1789   1
   4   3   5 51.6878  5.4529   5
   4   3   5 65.9332  5.8383   6
   4   3   5 64.4505  6.6408   7
   4   3   5 71.4640  7.0205   2
  -5  -3  -5 2811.13  195.64   1
  -5  -3  -5 2788.39  104.13   5
   5   3   5 2994.81  155.78   1
   5   3   5 2709.84  103.16   5
   5   3   5 2925.47  154.79   1
   5   3   5 2873.97  200.37   6
   5   3   5 2861.27  195.18   3
   5   3   5 2876.83  131.48   2
  -6  -3  -5 218.460  14.473   1
  -6  -3  -5 227.969  15.599   5
  -6  -3  -5 194.392  11.590   1
   6   3   5 204.792  12.169   2
   6   3   5 207.819  14.607   5
   6   3   5 216.530  12.923   1
   6   3   5 195.929  10.441   6
   6   3   5 212.104  11.568   1
   6   3   5 196.756  14.102   3
  -7  -3  -5 264.636  21.433   1
  -7  -3  -5 277.485  17.557   5
  -7  -3  -5 271.255  17.343   1
   7   3   5 271.961  18.506   2
   7   3   5 270.586  20.897   3
   7   3   5 277.195  23.559   1
   7   3   5 277.369  16.121   5
   7   3   5 283.782  15.614   1
  -8  -3  -5 19.6601  4.0382   1
   8   3   5 33.1467  4.3868   1
   8   3   5 23.0496  3.6718   1
   8   3   5 21.8176  7.2007   3
   8   3   5 25.0307  6.7213   5
  -9  -3  -5 33.1583  4.4802   1
   9   3   5 28.0177  5.1634   1
   9   3   5 24.2352  4.1839   1
   9   3   5 39.2305  7.2271   4
   9   3   5 41.7197  6.9467   5
   9   3   5 44.2678  8.7050   3
 -10  -3  -5 54.0071  7.5730   1
  10   3   5 50.9505  5.2196   1
  10   3   5 55.4174 10.1418   3
  10   3   5 62.3772  6.9307   4
 -11  -3  -5 5.65882 3.17357   1
  11   3   5 1.35456 9.84462   3
 -12  -3  -5 46.0951  6.6696   1
   9  -4  -5 39.9264 11.7436   1
  -9   4   5 41.8517 12.6899   1
   8  -4  -5 8.78096 8.47764   1
  -8   4   5 10.9192  8.9825   1
   7  -4  -5 82.0303 13.4788   1
  -7   4   5 98.0977 15.1290   1
   6  -4  -5 0.53303 6.43280   1
   6  -4  -5 6.80241 7.55681   1
  -6   4   5 8.56170 5.89064   1
  -6   4   5 -2.2587  5.8181   1
   5  -4  -5 920.082  61.252   1
   5  -4  -5 926.182  73.725   1
  -5   4   5 878.429  36.612   4
  -5   4   5 890.079  67.707   1
  -5   4   5 845.817  69.141   1
   4  -4  -5 449.968  31.402   1
   4  -4  -5 378.164  42.700   1
   4  -4  -5 412.163  25.626   5
  -4   4   5 407.017  36.004   1
  -4   4   5 406.162  35.865   1
  -4   4   5 372.208  25.885   4
   3  -4  -5 18.7149  6.8266   1
   3  -4  -5 27.7245  6.2250   1
   3  -4  -5 22.0685  3.1015   5
  -3   4   5 21.2948  4.2893   4
  -3   4   5 8.92816 4.55473   1
  -3   4   5 26.7124  6.2384   1
   2  -4  -5 1427.82   70.67   5
   2  -4  -5 1427.55   60.34   1
   2  -4  -5 1494.47   62.24   1
  -2   4   5 1405.62   48.46   1
  -2   4   5 1442.89   85.03   1
  -2   4   5 1403.40   59.50   4
   1  -4  -5 1196.90   54.19   1
   1  -4  -5 1255.70   40.44   5
   1  -4  -5 1335.49   92.75   1
  -1   4   5 1350.55   56.71   1
  -1   4   5 1195.62   37.34   1
  -1   4   5 1244.62   52.01   4
   0  -4  -5 3782.46  172.70   1
   0  -4  -5 3741.38  154.63   5
   0  -4  -5 3707.41  139.19   1
   0   4   5 3969.56  151.85   1
   0   4   5 3802.70  123.00   2
   0   4   5 3913.43  162.46   4
   0   4   5 3763.52  150.70   1
  -1  -4  -5 841.611  36.636   1
  -1  -4  -5 854.922  44.251   3
  -1  -4  -5 893.232  32.481   5
  -1  -4  -5 835.132  29.765   1
  -1  -4  -5 863.537  53.076   7
   1   4   5 855.632  35.189   1
   1   4   5 848.747  33.912   5
   1   4   5 812.514  41.093   1
   1   4   5 847.210  43.897   2
  -2  -4  -5 1138.66   67.49   7
  -2  -4  -5 1132.46   41.96   1
  -2  -4  -5 1139.24   42.05   1
  -2  -4  -5 1160.93   44.53   5
  -2  -4  -5 1152.85   56.65   3
   2   4   5 1154.84   40.73   2
   2   4   5 1150.83   44.55   1
   2   4   5 1187.57   53.26   5
   2   4   5 1077.57   42.06   1
  -3  -4  -5 91.8116  8.8889   5
  -3  -4  -5 74.4592  7.8974   3
  -3  -4  -5 78.4110  5.3917   1
   3   4   5 81.0313  9.4034   2
   3   4   5 80.3714  6.2291   1
   3   4   5 82.8104  7.3206   3
   3   4   5 74.2239  6.9200   7
   3   4   5 86.8859  4.7879   1
   3   4   5 78.3816  8.2134   5
  -4  -4  -5 65.9291  3.3520   1
  -4  -4  -5 83.7222  7.4172   5
  -4  -4  -5 60.1945  4.9223   1
   4   4   5 81.5792  7.4220   6
   4   4   5 55.7704  5.9897   3
   4   4   5 85.6859  8.6276   5
   4   4   5 73.0731  8.2630   2
   4   4   5 62.2885  4.4514   1
   4   4   5 79.5670  7.7020   7
   4   4   5 69.1890  4.2161   1
  -5  -4  -5 382.410  27.395   5
   5   4   5 391.525  24.557   2
   5   4   5 363.922  26.255   7
   5   4   5 381.427  19.541   3
   5   4   5 396.204  20.185   6
   5   4   5 362.040  25.860   5
   6   4   5 457.299  29.849   6
   6   4   5 464.524  43.571   7
   6   4   5 473.760  33.501   3
   6   4   5 469.710  42.266   5
   6   4   5 470.582  37.431   2
   7   4   5 1184.60   84.14   5
   7   4   5 1063.24   70.10   4
   7   4   5 1063.78   89.62   3
   7   4   5 1199.08   63.19   2
   7   4   5 1143.23   54.56   6
   8   4   5 1548.43   78.92   4
   8   4   5 1626.57  145.86   3
   8   4   5 1586.76   93.42   2
   8   4   5 1596.42  106.66   5
  -9  -4  -5 6.34228 0.72873   1
   9   4   5 2.20105 8.29219   5
   9   4   5 11.8444  4.0864   4
   9   4   5 10.2774  9.9534   3
   9   4   5 17.7763  7.4470   2
 -10  -4  -5 18.6903  2.3736   1
 -10  -4  -5 22.1982  2.6408   1
  10   4   5 31.7586  7.4536   4
  10   4   5 30.8327 11.1747   3
  10   4   5 14.5176  6.7656   5
  10   4   5 41.2165 10.0488   2
 -11  -4  -5 36.2566  6.3739   1
  11   4   5 51.3751 16.6347   3
   8  -5  -5 261.629  34.635   1
  -8   5   5 279.974  27.989   1
   7  -5  -5 -2.2100  6.3830   1
  -7   5   5 11.8689  8.3811   1
   6  -5  -5 113.423  21.580   1
   6  -5  -5 170.562  20.311   1
  -6   5   5 139.898  15.470   1
   5  -5  -5 231.614  17.742   1
   5  -5  -5 273.281  30.379   1
  -5   5   5 292.408  19.681   1
  -5   5   5 300.630  22.440   1
   4  -5  -5 16.7289  7.5415   1
   4  -5  -5 13.1415  7.2390   1
  -4   5   5 21.6815  4.3515   4
  -4   5   5 23.4232  8.1434   1
  -4   5   5 32.7226  7.2476   1
   3  -5  -5 32.8897  7.5148   1
   3  -5  -5 25.1930  5.0221   1
  -3   5   5 29.2354  4.2404   4
  -3   5   5 27.6097  6.4191   1
  -3   5   5 25.3327  6.9123   1
   2  -5  -5 176.238  16.042   1
   2  -5  -5 174.918  10.931   1
  -2   5   5 178.294  10.129   4
  -2   5   5 166.488  16.370   1
  -2   5   5 173.899  12.018   1
  -2   5   5 171.880  13.737   2
   1  -5  -5 317.936  22.797   1
   1  -5  -5 345.706  17.417   1
   1  -5  -5 322.869  13.411   5
  -1   5   5 355.728  18.249   1
  -1   5   5 339.457  17.104   1
  -1   5   5 327.223  19.393   4
  -1   5   5 341.888  18.260   2
   0  -5  -5 0.10339 2.70174   3
   0  -5  -5 5.80624 3.02731   1
   0  -5  -5 3.21819 2.86111   5
   0  -5  -5 0.02664 2.20148   1
   0   5   5 2.85917 2.55494   1
   0   5   5 1.76259 2.61426   5
   0   5   5 -1.2783  2.9093   1
   0   5   5 2.25546 2.36863   4
   0   5   5 0.18073 1.85947   2
  -1  -5  -5 1399.37   76.49   7
  -1  -5  -5 1452.86   83.24   3
  -1  -5  -5 1434.42   71.21   5
  -1  -5  -5 1384.84   50.97   1
  -1  -5  -5 1509.13   84.09   1
   1   5   5 1423.97   48.75   2
   1   5   5 1414.96   60.58   1
   1   5   5 1562.22   62.74   5
   1   5   5 1482.42   70.36   1
   1   5   5 1462.72   52.25   4
  -2  -5  -5 1.50175 3.06638   5
  -2  -5  -5 1.10103 1.62418   1
  -2  -5  -5 1.09990 2.15554   7
  -2  -5  -5 1.90719 1.50912   1
  -2  -5  -5 4.44949 4.07391   3
   2   5   5 1.66785 1.37557   1
   2   5   5 -1.3695  2.8945   5
   2   5   5 1.20252 2.35177   1
   2   5   5 2.32737 3.38802   4
   2   5   5 3.01923 2.64885   2
  -3  -5  -5 70.0196  4.6804   1
   3   5   5 90.6435  7.2197   7
   3   5   5 76.8981  8.7335   3
   3   5   5 75.3883  4.6228   1
   3   5   5 76.5237  5.2278   1
   3   5   5 80.0243  7.5506   5
   3   5   5 51.1977  8.2418   4
   3   5   5 77.6285  7.9700   2
   4   5   5 2085.20  133.72   3
   4   5   5 2131.75  134.92   7
   4   5   5 2114.32  103.75   4
   4   5   5 2173.19  112.18   5
   4   5   5 2276.98   92.25   2
   5   5   5 -1.7078  3.1001   3
   5   5   5 4.15992 3.92754   2
   5   5   5 7.45860 4.30624   5
   5   5   5 9.13570 4.50950   7
   5   5   5 5.30665 3.19267   4
   5   5   5 2.28421 2.98502   6
   6   5   5 891.537  45.585   4
   6   5   5 851.666  57.720   5
   6   5   5 921.419  51.968   2
   6   5   5 975.136  70.545   3
   6   5   5 925.075  65.463   6
   6   5   5 1063.35   84.86   7
   7   5   5 521.977  47.399   6
   7   5   5 525.421  36.664   5
   7   5   5 618.432  44.661   3
   7   5   5 529.504  23.525   2
   7   5   5 495.132  66.411   7
   7   5   5 543.289  34.501   4
   8   5   5 -3.9779  5.7666   2
   8   5   5 11.6137  5.9152   4
   8   5   5 6.97603 6.31029   5
   8   5   5 -4.0508  5.0296   3
   8   5   5 4.44632 4.77731   6
   8   5   5 -2.2226  5.0527   7
   9   5   5 191.101  23.405   5
   9   5   5 238.776  23.609   3
   9   5   5 244.056  28.042   4
   9   5   5 246.489  28.287   2
  10   5   5 36.6830  9.4568   2
  10   5   5 19.5489  5.5297   4
  10   5   5 15.1271  7.6358   3
  11   5   5 -2.1526 12.1132   2
  11   5   5  0.6216 12.8163   3
   8  -6  -5 -1.0400  8.4447   1
  -8   6   5 3.59788 8.98738   1
   7  -6  -5 241.586  29.239   1
  -7   6   5 263.457  24.693   1
   6  -6  -5 4.89136 6.81738   1
  -6   6   5 -9.2933  6.2598   1
   5  -6  -5 27.9606 11.3345   1
   5  -6  -5 24.2020  7.1910   1
  -5   6   5 13.9520  5.3418   1
  -5   6   5 43.5708 10.4158   1
   4  -6  -5 644.848  46.123   1
   4  -6  -5 622.678  35.376   1
  -4   6   5 578.913  37.528   4
  -4   6   5 613.750  51.323   1
  -4   6   5 540.869  45.473   1
   3  -6  -5 2.60952 3.98534   1
   3  -6  -5 0.00000 4.01183   1
  -3   6   5 2.25998 3.58915   4
  -3   6   5 5.95844 4.39188   1
  -3   6   5 -0.8843  3.9356   1
   2  -6  -5 221.368  20.492   1
   2  -6  -5 200.221  16.578   1
  -2   6   5 185.021  19.486   1
  -2   6   5 254.591  15.050   1
  -2   6   5 206.939  14.279   4
  -2   6   5 250.523  13.133   5
   1  -6  -5 229.556  16.949   3
   1  -6  -5 232.752  14.660   1
   1  -6  -5 201.211  15.976   1
  -1   6   5 212.050  19.196   4
  -1   6   5 196.076  14.366   1
  -1   6   5 193.648  13.247   5
  -1   6   5 221.465  16.407   1
   0  -6  -5 494.768  13.970   1
   0  -6  -5 456.259  24.043   1
   0  -6  -5 472.843  25.289   3
   0   6   5 434.176  25.405   4
   0   6   5 489.077  31.288   5
   0   6   5 439.659  23.362   1
   0   6   5 446.438  19.257   1
  -1  -6  -5 165.272   9.604   1
  -1  -6  -5 194.084  15.428   3
  -1  -6  -5 192.082  11.978   7
  -1  -6  -5 196.299  11.104   1
   1   6   5 177.943  11.362   1
   1   6   5 189.607  16.508   5
   1   6   5 187.312  11.857   4
   1   6   5 175.581  14.148   1
  -2  -6  -5 44.0027  5.3983   7
  -2  -6  -5 42.4244  4.4073   1
  -2  -6  -5 38.9599  4.3546   1
   2   6   5 39.9140  5.9254   5
   2   6   5 39.1131  7.3195   4
   2   6   5 31.8721  2.8785   1
  -3  -6  -5 635.861  37.291   7
  -3  -6  -5 575.986  23.993   1
   3   6   5 574.830  33.868   2
   3   6   5 616.477  31.585   5
   3   6   5 572.845  35.883   1
   3   6   5 602.913  38.812   3
   3   6   5 616.972  25.168   1
   3   6   5 589.723  34.208   4
   4   6   5 0.03811 6.02566   3
   4   6   5 -3.6708  3.4944   4
   4   6   5 -1.0592  3.5609   7
   4   6   5 1.91838 4.02005   5
   4   6   5 1.00669 3.07755   2
   5   6   5 -5.4182  3.5709   2
   5   6   5 1.88438 4.13130   7
   5   6   5 0.15291 4.04066   3
   5   6   5 7.18829 5.80679   5
   5   6   5 1.10215 4.49493   4
   5   6   5 1.84825 4.54818   6
   6   6   5 24.1390  5.8621   4
   6   6   5 35.6450  8.0188   7
   6   6   5 29.1888  7.5350   5
   6   6   5 45.9353 10.0132   6
   6   6   5 22.8219  6.4153   2
   6   6   5 21.6280  7.3716   3
   7   6   5 17.8076  6.7328   6
   7   6   5 13.0828  8.3539   3
   7   6   5 1.44310 4.46606   2
   7   6   5 21.3893  6.3082   4
   7   6   5 2.37413 6.80566   7
   7   6   5 9.52884 6.87949   5
   8   6   5 97.7473 10.8772   3
   8   6   5 143.068  15.879   6
   8   6   5 95.5054 13.9207   5
   8   6   5 117.545  14.099   2
   8   6   5 81.6088 10.5212   4
   9   6   5 221.113  13.895   4
   9   6   5 239.483  32.348   2
   9   6   5 280.912  26.469   3
  10   6   5 1.59522 5.55822   4
  10   6   5  7.1743 12.7468   3
  10   6   5 -4.3219  8.1297   2
   8  -7  -5 12.2822 12.8053   1
  -8   7   5 -5.7522 11.1996   1
   7  -7  -5 19.5437  8.2524   1
  -7   7   5 7.46872 8.73143   1
   6  -7  -5 137.456  15.572   1
  -6   7   5 146.168  15.395   1
   5  -7  -5 194.358  16.798   1
   5  -7  -5 162.504  17.191   1
  -5   7   5 175.577  11.878   2
  -5   7   5 164.638  14.078   1
   4  -7  -5 66.4449 10.8647   1
   4  -7  -5 98.5991 12.9215   1
  -4   7   5 86.1935 15.0960   1
  -4   7   5 87.0459 11.9250   1
   3  -7  -5 32.8171  7.0502   1
   3  -7  -5 32.3412  7.6728   1
  -3   7   5 18.5966  5.5076   1
  -3   7   5 18.0065  5.5625   4
  -3   7   5 14.3885  4.0046   5
  -3   7   5 13.6344  5.4662   1
   2  -7  -5 91.8885  9.0602   1
   2  -7  -5 101.517   7.905   3
   2  -7  -5 114.240  12.055   1
  -2   7   5 100.533   9.049   1
  -2   7   5 116.308  11.856   4
  -2   7   5 122.401  13.445   5
  -2   7   5 98.3708  9.0740   1
   1  -7  -5 449.630  21.074   1
   1  -7  -5 519.841  41.121   3
   1  -7  -5 449.310  42.117   1
  -1   7   5 437.771  25.993   4
  -1   7   5 431.632  29.873   1
  -1   7   5 449.317  26.504   1
  -1   7   5 481.991  37.629   5
   0  -7  -5 1039.80   50.76   7
   0  -7  -5 1028.90   59.61   3
   0  -7  -5 965.989  45.212   1
   0  -7  -5 1029.64   68.03   1
   0   7   5 1069.25   64.52   5
   0   7   5 991.504  70.919   4
   0   7   5 1009.52   69.94   1
   0   7   5 1059.80   47.72   1
  -1  -7  -5 255.394  16.459   7
  -1  -7  -5 291.104  18.255   1
  -1  -7  -5 280.678  12.169   1
   1   7   5 298.605  14.231   1
   1   7   5 285.387  20.707   5
   1   7   5 309.910  19.463   1
   1   7   5 275.585  16.882   4
  -2  -7  -5 15.4603  2.8876   1
  -2  -7  -5 20.8746  5.5257   7
   2   7   5 19.7957  8.5328   5
   2   7   5 12.2830  2.0823   1
   2   7   5 26.4975  7.3969   4
   2   7   5 10.7088  3.6758   3
   2   7   5 18.3132  3.4512   1
  -3  -7  -5 4.44087 1.55244   1
  -3  -7  -5 13.2660  4.3956   7
   3   7   5 0.64879 1.75728   1
   3   7   5 7.94560 4.37174   3
   3   7   5 5.86391 4.22496   5
   3   7   5 7.57402 4.71476   4
   3   7   5 9.32931 2.01162   1
   4   7   5 284.829  22.873   7
   4   7   5 249.332  27.007   5
   4   7   5 291.273  20.622   4
   4   7   5 285.592  16.852   3
   5   7   5 22.5442  7.2116   3
   5   7   5 42.3790  8.8307   2
   5   7   5 36.8437  8.7368   5
   5   7   5 43.0611  9.7070   7
   5   7   5 56.4615  8.6806   4
   5   7   5 60.2426  8.8290   6
   6   7   5 20.1884  7.3591   3
   6   7   5 25.7215  7.0345   4
   6   7   5 18.6291  9.0533   7
   6   7   5 22.5404  8.3743   5
   6   7   5 46.7404  9.5049   6
   6   7   5 47.1746  9.7718   2
   7   7   5 3.46877 6.83151   3
   7   7   5 7.61585 5.60634   6
   7   7   5 2.91695 4.07137   4
   7   7   5  8.9519 11.6184   2
   8   7   5 14.7574  6.7613   6
   8   7   5 12.9964  8.0721   3
   8   7   5 17.9091  8.9743   2
   8   7   5 11.5366  5.8715   4
   9   7   5 33.6876 10.8973   2
   9   7   5 32.0503 10.8438   3
   9   7   5 5.65788 7.63655   4
   9   7   5 11.7584  9.1249   6
  10   7   5 27.0462 10.1477   3
  10   7   5 11.1162 14.2915   2
   7  -8  -5 8.42822 7.82961   1
  -7   8   5 -3.8606 10.7065   1
   6  -8  -5 0.32302 7.19377   1
  -6   8   5 3.01650 8.99747   1
   5  -8  -5 807.367  59.732   1
   5  -8  -5 863.967  78.588   1
  -5   8   5 879.959  84.909   1
   4  -8  -5 338.209  55.534   1
   4  -8  -5 387.420  31.340   3
   4  -8  -5 402.505  35.864   1
  -4   8   5 394.941  31.024   1
   3  -8  -5 366.279  30.172   1
   3  -8  -5 308.689  24.781   1
   3  -8  -5 356.587  29.123   3
  -3   8   5 341.438  33.172   5
  -3   8   5 359.704  25.448   1
  -3   8   5 295.636  25.908   1
  -3   8   5 360.590  30.386   4
   2  -8  -5 20.0415  7.8650   1
   2  -8  -5 8.59914 5.46258   1
   2  -8  -5 3.73539 5.26696   4
   2  -8  -5 14.2273  3.8895   3
  -2   8   5 12.3295  4.0182   4
  -2   8   5 4.65376 5.50105   5
  -2   8   5 20.5549  7.6298   1
   1  -8  -5 2.89611 4.83452   1
   1  -8  -5 1.31777 5.31215   4
   1  -8  -5 1.80965 2.68404   3
   1  -8  -5 0.99901 3.65285   1
  -1   8   5 9.73692 4.60544   4
  -1   8   5 -4.2674  3.7257   1
  -1   8   5 1.52219 5.02290   5
  -1   8   5 0.94887 3.90459   1
   0  -8  -5 1815.23   95.54   1
   0  -8  -5 1688.42   56.69   1
   0  -8  -5 1693.51   99.89   7
   0   8   5 1636.22   90.05   4
   0   8   5 1712.93  150.84   1
   0   8   5 1783.71  158.74   5
   0   8   5 1787.31  116.97   1
  -1  -8  -5 66.4840  7.8426   7
  -1  -8  -5 63.3065  6.1810   1
  -1  -8  -5 58.6590  6.9684   1
   1   8   5 51.7754  7.9477   4
   1   8   5 57.9059  9.3257   5
   1   8   5 48.6274  7.4527   1
   1   8   5 49.6690  6.7505   1
  -2  -8  -5 -1.9790  3.4674   1
  -2  -8  -5 2.77593 3.29841   7
  -2  -8  -5 -0.9273  2.8766   1
   2   8   5 -1.1268  4.5471   5
   2   8   5 -0.5183  2.1014   1
   2   8   5 -0.0751  3.3559   3
   2   8   5 -3.7566  2.9275   1
   2   8   5 2.63948 4.72103   4
  -3  -8  -5 124.225   8.713   1
  -3  -8  -5 127.500  11.345   7
   3   8   5 176.134  24.185   5
   3   8   5 107.782  11.217   1
   3   8   5 142.492  14.493   3
   3   8   5 159.384  14.810   4
   3   8   5 128.073  11.268   1
  -4  -8  -5 23.6800  2.5618   1
  -4  -8  -5 26.6257  2.4164   1
   4   8   5 23.8217  2.5811   1
   4   8   5 41.4213  9.5531   3
   4   8   5 21.6825  7.2693   5
   4   8   5 25.9493  2.8577   1
   4   8   5 22.5843  6.2325   4
   5   8   5 368.971  29.047   6
   5   8   5 312.167  29.048   4
   5   8   5 246.290  36.191   5
   5   8   5 321.262  37.766   7
   5   8   5 307.903  28.277   3
   6   8   5 235.273  22.177   6
   6   8   5 310.272  26.220   3
   6   8   5 297.595  27.158   2
   6   8   5 300.866  34.393   4
   7   8   5 1.73599 4.64664   4
   7   8   5 11.2111  8.1872   6
   7   8   5 -2.4106  7.0210   3
   7   8   5 3.88195 7.07830   2
   8   8   5 -5.7737  7.7775   2
   8   8   5 -1.9885  6.9864   6
   8   8   5 -1.3033  5.2646   4
   8   8   5 0.70451 8.09311   3
   9   8   5 24.6269 14.7015   2
   9   8   5 31.8668  8.9445   4
   9   8   5 53.4374 13.1864   6
   9   8   5 34.9943 13.3243   3
   7  -9  -5 12.6370 10.9086   1
  -7   9   5 18.1171 10.9028   1
   6  -9  -5 54.0858 13.2254   1
  -6   9   5 56.7580 15.3026   1
   5  -9  -5 259.505  32.299   1
  -5   9   5 296.451  32.559   1
   4  -9  -5 126.264  14.192   4
   4  -9  -5 201.641  27.678   3
   4  -9  -5 174.254  20.871   1
   4  -9  -5 233.525  34.192   1
  -4   9   5 156.356  18.792   1
  -4   9   5 168.779  24.221   5
   3  -9  -5 58.8174 10.3504   1
   3  -9  -5 60.1541  8.4492   3
   3  -9  -5 57.2790 11.8280   4
   3  -9  -5 32.6725  8.1678   1
  -3   9   5 48.8491  8.4606   5
  -3   9   5 54.7952 11.5352   1
   2  -9  -5 258.245  23.046   1
   2  -9  -5 225.610  19.511   4
   2  -9  -5 217.534  19.647   1
  -2   9   5 162.447  19.271   1
  -2   9   5 213.974  24.507   4
  -2   9   5 248.084  25.056   1
  -2   9   5 231.598  26.142   5
   1  -9  -5 27.8313  7.8209   4
   1  -9  -5 22.5725  5.2428   1
   1  -9  -5 17.5531  6.7449   7
   1  -9  -5 28.5006  9.1051   1
  -1   9   5 22.0136  6.3817   4
  -1   9   5 16.3034  5.1160   1
  -1   9   5 32.0403  7.5113   5
  -1   9   5 26.0610  7.2007   1
   0  -9  -5 41.3728 11.6277   4
   0  -9  -5 54.8963  7.8291   1
   0  -9  -5 61.5119  8.8834   7
   0  -9  -5 50.7942  8.1420   1
   0   9   5 62.7232  9.8235   1
   0   9   5 63.4573  8.8494   1
   0   9   5 71.7807  8.4420   4
   0   9   5 75.5996  9.5005   5
  -1  -9  -5 15.8978  5.2901   7
  -1  -9  -5 16.9799  4.1215   1
  -1  -9  -5 13.5927  6.7517   4
  -1  -9  -5 16.4107  4.7302   1
   1   9   5 10.9920  6.0605   1
   1   9   5 10.0344  9.1334   5
   1   9   5 11.3068  6.2860   4
   1   9   5 7.16488 4.33566   1
  -2  -9  -5 292.509  22.208   1
  -2  -9  -5 301.721  19.779   1
  -2  -9  -5 299.997  36.080   7
   2   9   5 273.659  22.099   4
   2   9   5 238.421  26.674   1
   2   9   5 279.140  26.170   1
   2   9   5 322.926  33.171   5
   2   9   5 267.949  29.382   3
  -3  -9  -5 3.96156 3.29593   1
  -3  -9  -5 5.79249 5.61618   7
  -3  -9  -5 1.21244 1.68689   1
   3   9   5 7.28208 4.54365   3
   3   9   5 -4.2381  4.8601   4
   3   9   5 0.23206 7.10372   5
   3   9   5 2.48429 2.40756   1
   3   9   5 -1.0116  3.0267   1
  -4  -9  -5 811.408 129.931   1
  -4  -9  -5 967.101  61.103   1
   4   9   5 889.892 106.114   3
   4   9   5 844.191  54.013   1
   4   9   5 938.609  78.766   4
   4   9   5 977.345  90.298   1
   5   9   5 719.144  70.902   4
   5   9   5 733.224  61.967   3
   5   9   5 712.100  49.736   6
   6   9   5 126.162  16.190   6
   6   9   5 162.862  17.217   4
   6   9   5 160.550  20.704   3
   7   9   5 116.965  14.929   4
   7   9   5 71.0393 16.2226   2
   7   9   5 82.8662 15.8729   6
   7   9   5 62.2699 13.6261   3
   8   9   5 21.4534  9.9211   3
   8   9   5 42.2382 11.5582   6
   8   9   5 19.6453  8.2888   4
   8   9   5 22.6435 10.2215   2
   6 -10  -5 -3.4154 13.0932   1
  -6  10   5  7.0743 12.9043   1
   5 -10  -5 4.77419 6.90107   1
  -5  10   5 13.7376  8.5567   1
   4 -10  -5 0.07421 8.34576   1
   4 -10  -5 12.2559  7.3034   1
  -4  10   5 6.23123 7.16372   1
   3 -10  -5 802.131  84.418   1
   3 -10  -5 810.733  74.401   1
  -3  10   5 786.285  97.894   5
  -3  10   5 788.593  61.430   1
   2 -10  -5 106.996  13.601   7
   2 -10  -5 88.6666 12.6073   1
   2 -10  -5 69.5527 13.3619   1
  -2  10   5 90.9478 13.7970   5
  -2  10   5 72.9415 10.8755   1
   1 -10  -5 191.550  17.425   1
   1 -10  -5 194.527  29.025   7
   1 -10  -5 191.287  20.747   1
  -1  10   5 206.565  19.583   1
  -1  10   5 209.427  25.944   5
   0 -10  -5 44.2837  9.0785   7
   0 -10  -5 61.2494 10.0899   1
   0 -10  -5 40.7510  8.0119   1
   0  10   5 46.9383  9.4491   1
   0  10   5 60.4240 14.3388   5
   0  10   5 44.3877  8.4466   4
  -1 -10  -5 -3.0248  4.7947   7
  -1 -10  -5 3.14060 4.64968   1
  -1 -10  -5 5.38033 5.95549   1
   1  10   5 3.08671 7.08336   4
   1  10   5 -0.3477  6.7794   5
   1  10   5 1.41782 5.38632   1
   1  10   5 -5.7162  6.9615   1
  -2 -10  -5 26.2871  6.0347   1
  -2 -10  -5 24.2341  4.5562   1
  -2 -10  -5 28.5836  7.0470   7
   2  10   5 11.6902  4.6786   1
   2  10   5 26.8414  6.3450   3
   2  10   5 21.7535  9.5513   4
   2  10   5 17.7276  5.4452   1
  -3 -10  -5 6.69149 3.29087   1
  -3 -10  -5 7.64827 5.35945   7
  -3 -10  -5 6.10423 3.83412   1
   3  10   5 1.16812 9.08508   4
   3  10   5 0.26864 3.70520   1
   3  10   5 1.00327 6.81974   3
  -4 -10  -5 111.698  10.820   1
  -4 -10  -5 84.2196 11.8843   1
   4  10   5 100.336  12.488   6
   4  10   5 84.7151 13.9431   3
   4  10   5 100.640  15.240   4
   5  10   5 42.6735 10.0210   3
   5  10   5 28.6761 10.3661   6
   5  10   5 67.0487 11.5543   4
   6  10   5 47.2658  7.3421   4
   6  10   5 47.2002  9.4209   3
   6  10   5 44.5531 13.4790   6
   7  10   5 32.7616 13.4229   6
   7  10   5 54.7071 14.8122   2
   7  10   5 51.1208 15.4085   3
   4 -11  -5 65.9724 11.6910   1
  -4  11   5 47.4537 15.3331   1
   3 -11  -5 2.22312 6.43945   7
   3 -11  -5 -8.1564  8.9453   1
  -3  11   5 -4.4762 11.0738   1
   2 -11  -5 6.20789 7.12033   1
   2 -11  -5 4.62665 6.24997   7
  -2  11   5 10.2442  7.2763   1
  -2  11   5  1.9193 10.5060   5
   1 -11  -5 236.077  30.724   1
   1 -11  -5 248.074  21.610   7
  -1  11   5 147.982  35.595   5
  -1  11   5 238.439  21.235   1
   0 -11  -5 31.0960  8.5612   1
   0 -11  -5 52.7049 13.0150   7
   0  11   5 31.1058  6.8831   1
  -1 -11  -5 64.1699 10.8746   7
  -1 -11  -5 66.7532  9.1727   1
  -2 -11  -5 27.2284  9.8820   7
  -2 -11  -5 29.4734  6.8475   1
   2  11   5 15.0976 21.0808   1
  -3 -11  -5 95.8111 13.1526   1
   3  11   5 86.4029 13.1439   3
  -4 -11  -5 24.6821  4.5660   1
   4  11   5 21.2618 10.0491   6
   4  11   5 20.2455  8.1495   3
   5  11   5 40.9441 10.3416   3
   5  11   5  6.0770 13.0914   6
   2 -12  -5 -1.2419  6.1925   1
   2 -12  -5 8.58363 7.53832   7
   1 -12  -5 3.78168 8.14561   7
   1 -12  -5 7.95321 5.96724   1
   0 -12  -5 93.9061 16.6129   7
   0 -12  -5 89.5882 16.2224   1
  -1 -12  -5 71.6708 15.9682   7
  -1 -12  -5 62.6693 11.8525   1
  -2 -12  -5 62.7279 10.3206   1
  -2 -12  -5 38.3522 15.0675   7
   0   7  -6 174.023  23.075   6
   0   7  -6 154.508  18.790   1
   0  -7   6 160.738  28.063   1
  -1   7  -6 3.73116 9.14496   1
  -1   7  -6 -5.2454  5.8339   6
   1  -7   6 -0.6279  7.0851   1
  -2   7  -6 19.4510 11.9007   1
  -2   7  -6 -7.2358  7.9655   6
   2  -7   6  5.2696 10.2570   1
  -3   7  -6 22.5138  9.7382   1
  -3   7  -6 30.4239  7.8382   6
   3  -7   6 8.38283 5.94025   7
   3  -7   6 13.6378  7.5819   1
  -4   7  -6 65.1992 10.0930   6
  -4   7  -6 62.0306 13.7755   1
   4  -7   6 74.5466 10.5532   7
   4  -7   6 60.8932 13.8161   1
  -5   7  -6 -16.546   6.967   1
  -5   7  -6 0.00000 6.42028   6
   5  -7   6 -3.0121  7.2794   7
   5  -7   6 11.2895  8.4956   1
  -6   7  -6 61.8254 12.0302   1
   6  -7   6 60.3301 15.9075   1
   6  -7   6 61.0130 11.7002   7
  -7   7  -6 5.90846 8.14284   1
   7  -7   6 5.34106 9.58317   1
   2   6  -6 84.0785 16.2344   1
  -2  -6   6 57.0189 14.0044   1
   1   6  -6 163.526  18.767   1
  -1  -6   6 174.043  21.768   1
   0   6  -6 -0.1994  5.3357   6
   0   6  -6 1.37702 9.99437   1
   0  -6   6 7.10420 8.02002   1
  -1   6  -6 108.741  16.596   1
  -1   6  -6 112.680  16.176   6
   1  -6   6 82.0611 13.0786   1
  -2   6  -6 514.468  50.561   1
  -2   6  -6 453.533  44.747   6
   2  -6   6 398.215  35.270   1
  -3   6  -6 38.2234  8.1664   1
  -3   6  -6 53.2544 10.9555   6
   3  -6   6 58.1933 11.0550   1
   3  -6   6 54.5112  7.8800   7
  -4   6  -6 68.4299  8.4368   6
  -4   6  -6 53.1896 11.1897   1
   4  -6   6 48.8274  8.4078   1
   4  -6   6 83.6843  9.7453   7
  -5   6  -6 120.834  12.526   6
  -5   6  -6 163.667  18.575   1
   5  -6   6 130.336  13.032   7
   5  -6   6 95.0704 16.1555   1
  -6   6  -6 31.3292  8.8253   1
   6  -6   6 58.4332  9.2292   1
  -7   6  -6 69.2356 16.5235   1
  -8   6  -6 135.980  24.100   1
   8  -6   6 114.659  20.103   1
  -9   6  -6 215.746  29.943   1
   4   5  -6 15.0327  9.4558   1
  -4  -5   6 17.2509  9.2073   1
   3   5  -6 29.1893 10.2865   1
  -3  -5   6 15.1255  8.2419   1
   2   5  -6 95.2219 13.6611   1
  -2  -5   6 74.0380 14.7753   1
  -2  -5   6 113.799  16.973   1
   1   5  -6 144.322  19.798   1
  -1  -5   6 152.567  18.558   1
  -1  -5   6 117.094  14.996   1
   0   5  -6 251.333  21.911   1
   0   5  -6 195.139  17.110   6
   0  -5   6 190.497  20.853   1
   0  -5   6 221.992  17.815   1
  -1   5  -6 -17.256   8.291   1
  -1   5  -6 1.24135 5.53335   6
   1  -5   6 14.1504  8.1934   1
   1  -5   6 -0.3642  6.6981   1
  -2   5  -6 84.3627 15.9422   1
  -2   5  -6 108.505  14.301   6
   2  -5   6 119.989  12.415   1
   2  -5   6 86.2301 14.9813   1
  -3   5  -6 319.456  31.707   1
  -3   5  -6 338.467  28.175   6
   3  -5   6 311.451  38.536   7
   3  -5   6 329.159  33.389   1
   3  -5   6 304.132  35.929   1
  -4   5  -6 13.5714  5.4013   6
  -4   5  -6 17.7790  8.0980   1
   4  -5   6 5.25791 8.28077   1
   4  -5   6 20.8611  9.0297   1
   4  -5   6 12.6044  5.1367   7
  -5   5  -6 42.8474  5.7147   3
  -5   5  -6 47.6565  7.9850   6
  -5   5  -6 46.0982 10.2878   1
   5  -5   6 46.0615 10.1325   1
   5  -5   6 54.4641  7.9565   7
  -6   5  -6 10.9032  8.3048   1
   6  -5   6 3.74275 6.45148   1
  -7   5  -6 268.020  31.070   1
   7  -5   6 306.339  27.289   1
  -8   5  -6 24.6571  9.1708   1
   8  -5   6 25.0539 12.5712   1
  -9   5  -6 12.4735  9.1798   1
   9  -5   6 0.46985 9.87580   1
 -10   5  -6 105.057  16.026   1
 -10   5  -6 93.2356 17.9316   5
  10  -5   6 80.0769 21.8471   1
   5   4  -6 23.0866  9.7313   1
  -5  -4   6 16.7302  8.7323   1
   4   4  -6 49.1143 13.6111   1
  -4  -4   6 61.7312 13.0543   1
   3   4  -6 40.0520 11.9843   1
   3   4  -6 39.0538  6.5180   7
  -3  -4   6 43.6195 10.4999   1
  -3  -4   6 30.4791 10.7891   1
  -2  -4   6 10.9585  8.2800   1
  -2  -4   6 78.6600 18.4256   1
   1   4  -6 1.29894 6.62751   1
  -1  -4   6  2.6003 10.9592   1
  -1  -4   6 6.21011 5.71421   1
   0   4  -6 571.306  51.452   1
   0   4  -6 634.592  58.815   1
   0   4  -6 524.177  38.003   6
   0  -4   6 657.204  45.170   1
   0  -4   6 599.749  56.764   1
  -1   4  -6 163.216  17.534   1
  -1   4  -6 168.000  15.342   6
  -1   4  -6 156.828  19.423   1
   1  -4   6 185.566  18.715   1
   1  -4   6 150.905  20.568   1
  -2   4  -6 107.212  17.140   1
  -2   4  -6 142.028  17.521   1
  -2   4  -6 117.390  11.169   6
   2  -4   6 120.235  12.694   1
   2  -4   6 116.363  12.084   1
  -3   4  -6 70.9589 12.5664   1
  -3   4  -6 37.3946  5.9371   6
   3  -4   6 34.9255  6.1324   7
   3  -4   6 54.0446 11.3166   1
   3  -4   6 51.0936  7.5289   1
  -4   4  -6 1.42857 3.16049   6
  -4   4  -6 3.05521 5.41195   1
  -4   4  -6 -1.2776  6.0267   1
   4  -4   6 -5.7929  5.4608   1
   4  -4   6 1.78991 2.26166   7
   4  -4   6 -0.5101  4.1858   1
  -5   4  -6 52.7363  8.2289   3
  -5   4  -6 66.2118  9.9682   1
  -5   4  -6 57.6346 11.5764   1
   5  -4   6 85.4817 13.3939   1
   5  -4   6 87.1656 11.1732   1
  -6   4  -6 74.0484 13.3391   1
   6  -4   6 98.1606  9.2796   1
  -7   4  -6 37.9750 14.1421   1
  -7   4  -6 52.7219  9.6516   1
   7  -4   6 50.1223  9.0067   1
  -8   4  -6 8.16742 6.17677   1
  -8   4  -6  5.4177 10.8634   1
   8  -4   6 -0.9125  6.2735   1
  -9   4  -6 -3.5675 12.6574   1
  -9   4  -6 1.14143 9.84917   1
   9  -4   6 -3.3278  9.8764   1
 -10   4  -6 7.94893 7.53718   1
 -10   4  -6 15.1166  6.3782   5
  10  -4   6 21.1429 10.1533   1
   6   3  -6 22.1337  9.2398   1
   5   3  -6 2.43924 7.53656   1
  -5  -3   6 14.9990 11.0956   1
   4   3  -6 33.4660 11.8860   1
   4   3  -6 48.6639  8.2525   7
  -4  -3   6 41.3594 11.9762   1
  -4  -3   6 23.1986  7.3579   4
  -4  -3   6 30.3738  9.9835   1
   3   3  -6 16.5189  7.9303   1
   3   3  -6 30.3551  7.6605   7
  -3  -3   6 38.6180  7.4841   1
  -3  -3   6 52.2264 12.4775   1
   2   3  -6 24.0970  4.6245   7
   2   3  -6 39.3993  7.3972   1
  -2  -3   6 26.5991  8.1063   1
  -2  -3   6 36.0426  9.7209   1
   1   3  -6 160.529  18.124   1
   1   3  -6 156.148  15.576   1
  -1  -3   6 164.161  16.705   1
  -1  -3   6 142.213  14.410   1
   0   3  -6 -3.7047  6.1246   1
   0   3  -6 3.63574 7.44366   1
   0  -3   6 -1.6482  7.7638   1
   0  -3   6 -3.8898  7.7735   1
  -1   3  -6 165.931  12.150   1
  -1   3  -6 199.539  16.044   1
  -1   3  -6 165.471  12.940   6
   1  -3   6 158.862  16.798   1
   1  -3   6 178.701  13.564   1
  -2   3  -6 18.2261  4.6350   6
  -2   3  -6 10.4321  4.5113   1
  -2   3  -6 -0.7754  6.2509   1
   2  -3   6 7.47000 4.37151   1
   2  -3   6 -1.5217  5.3960   1
  -3   3  -6 654.780  47.897   1
  -3   3  -6 623.478  52.897   6
  -3   3  -6 644.839  36.748   1
   3  -3   6 590.992  51.945   1
   3  -3   6 610.979  53.326   1
   3  -3   6 599.631  56.909   7
  -4   3  -6 463.133  35.007   1
  -4   3  -6 432.987  29.827   1
  -4   3  -6 454.343  35.063   6
   4  -3   6 455.555  39.575   1
   4  -3   6 396.233  23.931   1
  -5   3  -6 1784.72  229.96   6
  -5   3  -6 1794.78  102.34   1
  -5   3  -6 1860.45  166.82   1
  -5   3  -6 1689.22  145.06   3
   5  -3   6 1788.40  135.43   1
   5  -3   6 1764.61  162.87   1
  -6   3  -6 -1.5233  2.2593   3
  -6   3  -6 6.85976 7.70282   1
  -6   3  -6 6.27033 6.17274   1
   6  -3   6 -3.7165  7.2951   1
   6  -3   6 -2.2336  4.8049   1
  -7   3  -6 2.91135 6.40329   1
  -7   3  -6 8.29044 6.01010   1
   7  -3   6 -5.2668  6.3451   1
   7  -3   6 11.5496  6.7711   1
  -8   3  -6 29.6160 10.9772   1
  -8   3  -6 15.3905  6.4281   1
   8  -3   6 18.3396  6.1659   1
  -9   3  -6 11.3860  7.6524   1
  -9   3  -6 4.19688 7.13388   1
  -9   3  -6 8.88358 4.55188   5
   9  -3   6 -1.6006  5.8389   1
 -10   3  -6 -6.3792  9.5176   1
 -10   3  -6 10.6987  7.2104   1
 -10   3  -6 1.88960 4.08375   5
  10  -3   6 3.05403 7.75198   1
 -11   3  -6 93.4812 17.4167   5
 -11   3  -6 93.5333 15.9480   1
  11  -3   6 74.3692 13.7109   1
   6   2  -6 59.9697 14.8692   1
  -6  -2   6 56.8798 13.5319   1
   5   2  -6 5.15135 5.84964   1
   5   2  -6 -0.7019  5.7650   7
  -5  -2   6 14.3235  6.2636   1
  -5  -2   6 -8.4632  7.1537   1
   4   2  -6 14.1991  6.3862   7
   4   2  -6 15.9608  6.4908   1
  -4  -2   6 4.65695 5.31486   1
  -4  -2   6 11.3438  7.9970   1
  -4  -2   6 -7.7652  7.9922   6
   3   2  -6 374.977  35.772   1
   3   2  -6 368.453  35.720   7
  -3  -2   6 433.861  35.042   1
  -3  -2   6 396.537  39.635   6
  -3  -2   6 366.450  30.304   1
   2   2  -6 173.046  18.186   7
   2   2  -6 194.602  17.480   1
   2   2  -6 169.144  18.612   1
  -2  -2   6 171.459  21.657   1
  -2  -2   6 174.860  16.335   1
  -2  -2   6 121.715  20.529   6
   1   2  -6 905.567  57.621   7
   1   2  -6 767.767  70.224   1
   1   2  -6 823.247  46.936   1
  -1  -2   6 883.096  48.206   1
  -1  -2   6 810.890  76.058   1
   0   2  -6 539.886  47.886   1
   0   2  -6 531.260  27.443   1
   0  -2   6 554.571  49.613   1
   0  -2   6 541.744  34.524   1
  -1   2  -6 340.064  18.154   1
  -1   2  -6 305.237  27.654   1
   1  -2   6 337.238  20.102   1
   1  -2   6 395.448  36.799   1
  -2   2  -6 130.408   9.068   1
  -2   2  -6 115.347  12.129   1
   2  -2   6 143.594  16.778   1
   2  -2   6 104.247   9.980   1
  -3   2  -6 434.979  30.657   1
  -3   2  -6 394.845  21.119   1
  -3   2  -6 399.704  20.989   6
   3  -2   6 375.232  24.607   1
   3  -2   6 422.901  25.552   7
   3  -2   6 399.190  20.065   1
  -4   2  -6 14.5251  4.8749   1
  -4   2  -6 14.7708  1.7106   6
  -4   2  -6 19.9043  6.2848   1
  -4   2  -6 18.0022  4.9072   3
   4  -2   6 20.1830  6.4911   1
   4  -2   6 12.0147  4.9362   1
  -5   2  -6 72.3034 10.8339   1
  -5   2  -6 82.6985 10.8008   3
  -5   2  -6 95.7509  9.7316   6
  -5   2  -6 92.3557  9.7343   1
   5  -2   6 84.5415 10.7422   1
   5  -2   6 117.882  10.582   1
  -6   2  -6 3194.74  237.59   3
  -6   2  -6 3380.53  213.49   1
  -6   2  -6 3301.72  198.70   1
   6  -2   6 3188.61  222.50   1
   6  -2   6 3443.14  276.41   1
  -7   2  -6 338.046  27.997   1
  -7   2  -6 299.521  37.020   1
   7  -2   6 278.529  23.458   1
   7  -2   6 351.663  30.409   1
  -8   2  -6 234.804  21.949   6
  -8   2  -6 235.175  20.194   1
  -8   2  -6 238.087  16.159   5
  -8   2  -6 206.870  15.666   1
   8  -2   6 256.614  21.892   1
   8  -2   6 233.789  23.919   1
  -9   2  -6 7.22935 4.68735   1
  -9   2  -6 16.9512  5.5648   5
  -9   2  -6 27.2450  7.9072   1
  -9   2  -6 12.9877  3.3777   6
   9  -2   6 9.66912 4.39489   1
 -10   2  -6 107.028  17.149   1
 -10   2  -6 106.800  11.242   6
 -10   2  -6 132.355  14.719   1
 -10   2  -6 113.780  17.124   5
  10  -2   6 73.6578 16.0407   1
 -11   2  -6 43.2446  8.9293   5
 -11   2  -6 45.6076  9.5692   1
  11  -2   6 36.5175 10.3240   1
   7   1  -6 114.803  17.468   1
  -7  -1   6 101.224  19.589   1
   6   1  -6 122.569  15.916   1
  -6  -1   6 153.738  20.228   1
  -6  -1   6 102.656  14.841   1
   5   1  -6 14.5987  6.8041   1
  -5  -1   6  8.5441 27.9584   1
  -5  -1   6 17.9908  4.0380   4
  -5  -1   6 11.4582  9.2405   1
   4   1  -6 203.941  17.990   1
  -4  -1   6 184.806  14.132   1
  -4  -1   6 165.063  16.989   6
  -4  -1   6 190.620  20.678   1
   3   1  -6 548.330  83.787   1
   3   1  -6 592.631  49.477   1
  -3  -1   6 543.043  73.599   6
  -3  -1   6 611.221  51.411   1
  -3  -1   6 669.831  56.019   1
   2   1  -6 29.3124  7.3924   1
   2   1  -6 41.4408 11.4859   1
   2   1  -6 36.0814  4.3744   7
  -2  -1   6 35.0687  6.8843   1
  -2  -1   6 24.6371  6.1093   6
  -2  -1   6 26.3333  7.1528   1
   1   1  -6 -0.6445  1.2930   7
   1   1  -6 3.53469 3.87303   1
   1   1  -6 -3.7667  4.2142   1
  -1  -1   6 -3.5216  2.6642   6
  -1  -1   6 5.15939 5.15844   1
  -1  -1   6 -1.9592  3.5348   1
   0   1  -6 546.212  48.631   1
   0   1  -6 488.942  18.347   1
   0  -1   6 590.899  39.101   1
   0  -1   6 556.994  50.839   6
   0  -1   6 606.274  28.122   1
  -1   1  -6 1206.61   61.32   1
  -1   1  -6 1170.56   40.91   1
   1  -1   6 1117.94   52.00   1
   1  -1   6 1208.58   72.87   1
  -2   1  -6 212.733  16.147   1
  -2   1  -6 234.349  19.921   1
   2  -1   6 217.040  17.149   1
   2  -1   6 244.715  18.117   1
  -3   1  -6 28.0380  6.0243   1
   3  -1   6 30.2287  5.0350   1
   3  -1   6 33.6552  6.5947   1
   3  -1   6 23.1719  2.2685   7
  -4   1  -6 21.4699  4.4107   3
  -4   1  -6 19.1795  4.0334   1
  -4   1  -6 26.5348  5.3920   1
   4  -1   6 9.48559 5.54563   1
   4  -1   6 23.0403  5.0386   1
  -5   1  -6 6.21453 3.07091   3
  -5   1  -6 6.88965 4.51273   1
  -5   1  -6 4.94679 2.74323   1
   5  -1   6 7.06732 4.30851   1
   5  -1   6 3.04204 3.34399   1
  -6   1  -6 66.1131  7.3089   1
  -6   1  -6 68.8078  8.6386   1
  -6   1  -6 59.0838  5.2748   6
   6  -1   6 54.1817  7.2533   1
   6  -1   6 55.9083  5.8687   1
  -7   1  -6 8.29047 1.72612   6
  -7   1  -6 6.17371 4.48107   5
  -7   1  -6 8.76976 4.47391   1
  -7   1  -6 14.3667  4.4104   1
  -7   1  -6 1.15468 5.31728   2
   7  -1   6 5.22933 4.97737   1
   7  -1   6 5.22383 4.06631   1
  -8   1  -6 302.139  22.847   1
  -8   1  -6 293.372  32.901   1
  -8   1  -6 323.752  29.197   5
  -8   1  -6 307.598  33.166   6
  -8   1  -6 311.519  24.410   2
   8  -1   6 313.763  28.751   1
   8  -1   6 333.685  24.647   1
  -9   1  -6 61.4674  7.5726   1
  -9   1  -6 42.9570  8.9653   1
  -9   1  -6 57.1185  7.6018   6
   9  -1   6 57.4310 10.4933   1
   9  -1   6 49.6389  8.8699   1
 -10   1  -6 95.1951  9.7602   6
 -10   1  -6 85.0570 11.9840   1
 -10   1  -6 73.9979 10.8122   5
 -10   1  -6 78.6562 12.9608   1
  10  -1   6 73.0379 13.4417   1
  10  -1   6 77.7789 12.5030   3
 -11   1  -6 -4.7012  4.9978   1
 -11   1  -6 -0.4816  4.7888   5
  11  -1   6 -5.5277  5.2028   3
 -12   1  -6 34.7449 11.6039   1
 -12   1  -6 9.08107 8.31565   5
  12  -1   6  4.3588 10.1517   3
   7   0  -6 2.65355 8.64482   1
  -7   0   6 1.93763 6.03285   1
   6   0  -6 29.1137  6.4922   2
   6   0  -6 14.3322  8.0318   1
  -6   0   6 8.01199 8.94910   1
  -6   0   6 12.4148  9.0806   1
   5   0  -6 197.795  22.797   1
  -5   0   6 182.386  21.373   6
  -5   0   6 188.739  29.025   1
  -5   0   6 236.604  26.424   1
   4   0  -6 4.04740 5.01907   1
   4   0  -6 3.48496 6.43179   1
  -4   0   6 12.5057  6.7787   6
  -4   0   6 11.2325  5.6792   1
  -4   0   6 5.18461 6.96271   1
   3   0  -6 413.609  30.568   1
   3   0  -6 417.239  29.502   1
  -3   0   6 443.589  26.442   1
  -3   0   6 441.958  45.657   6
  -3   0   6 458.577  39.345   1
   2   0  -6 1166.50   82.12   1
   2   0  -6 1084.84   42.15   1
  -2   0   6 1243.89   67.73   1
  -2   0   6 1083.90   76.54   1
  -2   0   6 1053.44   90.50   6
   1   0  -6 370.828  32.376   1
   1   0  -6 343.070  16.465   1
  -1   0   6 382.140  20.400   1
  -1   0   6 366.988  28.608   1
  -1   0   6 380.125  24.838   6
   0   0  -6 662.694  32.352   7
   0   0  -6 605.892  30.740   1
   0   0  -6 665.240  40.447   1
   0   0   6 624.489  30.388   1
   0   0   6 630.558  36.609   6
   0   0   6 649.608  42.138   1
  -1   0  -6 7.70518 4.88489   1
  -1   0  -6 5.25439 3.37501   1
   1   0   6 14.4819  5.4387   1
   1   0   6 -2.2091  3.0641   1
   1   0   6 2.58641 1.71291   6
  -2   0  -6 35.4674  5.5944   1
  -2   0  -6 31.0707  4.6300   1
   2   0   6 21.5859  4.8121   1
   2   0   6 34.4014  5.0948   1
  -3   0  -6 684.951  44.662   1
  -3   0  -6 689.512  31.643   1
   3   0   6 699.766  34.979   1
   3   0   6 710.888  38.577   1
  -4   0  -6 1235.73   76.76   1
  -4   0  -6 1162.15   70.99   1
  -4   0  -6 1271.44   50.87   3
   4   0   6 1248.31   78.59   1
   4   0   6 1278.81   63.68   1
  -5   0  -6 1048.52   72.40   3
  -5   0  -6 1054.25   39.21   1
  -5   0  -6 1071.25   49.77   1
   5   0   6 1108.44   43.45   1
   5   0   6 1140.34   43.13   1
  -6   0  -6 28.2836  5.1572   1
  -6   0  -6 23.5120  5.6039   1
  -6   0  -6 27.8126 11.2581   5
  -6   0  -6 19.8838  6.1383   2
   6   0   6 33.9545  5.9567   1
   6   0   6 29.2894  5.3612   1
  -7   0  -6 8.17719 6.13105   2
  -7   0  -6 6.59920 5.27966   5
  -7   0  -6 5.05013 3.39034   1
  -7   0  -6 9.69395 3.81176   1
  -7   0  -6 3.70386 1.76670   6
   7   0   6 10.5484  4.2154   1
   7   0   6 -0.3461  2.9668   1
  -8   0  -6 27.6256  7.3720   2
  -8   0  -6 56.3546  6.1486   6
  -8   0  -6 50.2831  7.3190   1
  -8   0  -6 53.7760  9.5510   5
  -8   0  -6 53.9321  8.3754   1
   8   0   6 34.8284  6.2770   1
   8   0   6 52.3065  8.6552   1
   8   0   6 48.1486  7.9445   3
  -9   0  -6 6.63254 5.31153   1
  -9   0  -6 14.7648  4.5098   1
  -9   0  -6 -5.9049  5.7328   2
  -9   0  -6 6.00850 4.52575   5
  -9   0  -6 11.1042  5.0187   6
   9   0   6 1.20098 3.98593   1
   9   0   6 12.5581  6.1161   1
   9   0   6 -2.5699  3.8343   3
 -10   0  -6 559.876  42.429   5
 -10   0  -6 493.702  46.075   6
 -10   0  -6 420.637  58.660   1
 -10   0  -6 533.695  38.652   1
  10   0   6 480.242  39.965   1
  10   0   6 497.529  68.149   3
 -11   0  -6 -0.5963  4.2351   1
 -11   0  -6 -0.2683  3.8398   6
  11   0   6 -5.0862  6.0232   3
 -12   0  -6 7.52829 5.34275   1
  12   0   6 2.47885 7.80098   3
   8  -1  -6 2.57321 7.84498   1
  -8   1   6 2.10870 7.28033   1
   7  -1  -6 121.920  16.605   1
  -7   1   6 134.999  18.551   1
   6  -1  -6 27.4703 10.4682   1
   6  -1  -6 3.60986 2.22483   2
  -6   1   6 -2.0125  7.2767   1
  -6   1   6 3.25566 8.60931   1
   5  -1  -6 13.4878  6.4124   1
   5  -1  -6 11.9586  3.2534   2
  -5   1   6 7.32237 7.82312   1
  -5   1   6 10.4140  7.5460   6
  -5   1   6 20.2060  6.7724   1
  -5   1   6 14.8596  3.2955   4
   4  -1  -6 54.6526  7.6006   1
   4  -1  -6 51.5458  9.3715   1
  -4   1   6 33.1218  9.7178   1
  -4   1   6 55.4109  9.8454   1
  -4   1   6 51.3372  9.0377   6
   3  -1  -6 285.568  26.035   1
   3  -1  -6 306.570  24.031   1
  -3   1   6 334.576  21.230   1
  -3   1   6 322.305  30.181   6
  -3   1   6 295.244  33.592   1
   2  -1  -6 634.992  33.836   1
   2  -1  -6 577.356  50.620   1
  -2   1   6 614.610  62.758   6
  -2   1   6 533.352  29.559   1
  -2   1   6 613.586  42.666   1
   1  -1  -6 -2.9524  2.7116   1
   1  -1  -6 3.77508 3.27616   1
  -1   1   6 3.65589 3.81896   1
  -1   1   6 0.11746 2.91913   6
  -1   1   6 -3.2384  3.5338   1
   0  -1  -6 372.576  13.936   1
   0  -1  -6 359.960  24.913   1
   0   1   6 342.940  14.714   1
   0   1   6 397.295  29.182   1
  -1  -1  -6 467.684  23.623   1
  -1  -1  -6 539.106  17.653   1
   1   1   6 549.947  18.760   1
   1   1   6 552.696  22.303   1
  -2  -1  -6 1922.93   76.48   1
  -2  -1  -6 1897.34   83.96   1
   2   1   6 1902.70  104.36   1
   2   1   6 1857.71   84.42   6
   2   1   6 1910.25   62.15   1
  -3  -1  -6 541.144  29.429   3
  -3  -1  -6 558.928  21.898   1
  -3  -1  -6 536.120  35.091   1
   3   1   6 503.691  31.018   1
   3   1   6 526.815  33.294   7
   3   1   6 525.288  24.674   1
  -4  -1  -6 75.0863  6.6732   1
  -4  -1  -6 89.1832  7.8854   3
  -4  -1  -6 62.2666  7.9273   1
   4   1   6 68.0618  9.4039   1
   4   1   6 63.7685  6.2929   1
  -5  -1  -6 132.610   8.492   1
  -5  -1  -6 163.550  12.749   2
  -5  -1  -6 151.817  13.169   1
  -5  -1  -6 126.293  12.320   3
  -5  -1  -6 142.051  12.185   5
   5   1   6 145.330  10.408   1
   5   1   6 140.314   9.401   1
  -6  -1  -6 41.8056  7.3636   5
  -6  -1  -6 38.9505  7.6424   2
  -6  -1  -6 37.8598  6.0101   1
  -6  -1  -6 49.2842  5.6275   1
   6   1   6 40.7005  4.7085   1
   6   1   6 34.7893  3.9639   1
  -7  -1  -6 391.378  27.335   2
  -7  -1  -6 379.079  28.988   1
  -7  -1  -6 385.445  22.478   1
  -7  -1  -6 434.532  25.658   5
   7   1   6 370.546  30.657   1
   7   1   6 413.236  28.023   1
   7   1   6 364.455  28.167   3
  -8  -1  -6 -5.1076  7.2055   2
  -8  -1  -6 9.35768 4.91783   5
  -8  -1  -6 0.37425 2.25937   6
  -8  -1  -6 6.84597 2.73158   1
  -8  -1  -6 5.65663 3.32781   1
   8   1   6 5.03441 4.92518   3
   8   1   6 -0.4609  2.6013   1
  -9  -1  -6 315.310  34.021   6
  -9  -1  -6 283.680  32.297   1
  -9  -1  -6 280.775  26.545   2
  -9  -1  -6 311.860  27.107   5
  -9  -1  -6 282.965  27.298   1
   9   1   6 319.857  28.123   1
   9   1   6 262.219  23.601   1
   9   1   6 285.876  34.813   3
 -10  -1  -6 31.6139  6.4917   1
 -10  -1  -6 45.1372  8.2192   5
 -10  -1  -6 25.5980  4.3354   1
 -10  -1  -6 30.2060  5.8024   6
  10   1   6 28.9119  7.6508   3
  10   1   6 25.7233  6.2725   1
  10   1   6 21.4429  5.9783   1
 -11  -1  -6 110.407  14.290   1
 -11  -1  -6 110.483  12.437   6
  11   1   6 106.936  13.137   3
 -12  -1  -6 20.3180  7.8644   1
  12   1   6 15.7913  9.4329   3
   8  -2  -6 332.768  36.723   1
  -8   2   6 401.366  59.627   1
   7  -2  -6 7.76879 7.74560   1
  -7   2   6 -1.7595  6.2002   1
   6  -2  -6 474.905  46.494   1
  -6   2   6 437.391  43.076   1
  -6   2   6 478.561  36.192   1
   5  -2  -6 169.277  22.526   1
   5  -2  -6 191.464  17.907   1
  -5   2   6 178.400  19.827   4
  -5   2   6 208.502  19.216   1
  -5   2   6 182.347  21.123   1
   4  -2  -6 2933.25  175.88   1
   4  -2  -6 2689.68  143.88   2
   4  -2  -6 3132.88  200.56   1
  -4   2   6 2882.03  170.47   4
  -4   2   6 2969.02  206.86   1
  -4   2   6 3119.97  173.71   1
   3  -2  -6 7.84903 6.00379   1
   3  -2  -6 12.6264  4.7675   1
  -3   2   6 16.0174  5.3806   1
  -3   2   6 6.29515 4.85211   1
   2  -2  -6 34.1437  6.1189   1
  -2   2   6 39.1541  4.8555   1
  -2   2   6 31.8639  7.1327   1
   1  -2  -6 5.91235 4.14485   1
  -1   2   6 6.51250 4.25730   1
  -1   2   6 4.80728 5.26220   1
   0  -2  -6 527.593  23.148   1
   0  -2  -6 549.705  29.902   1
   0   2   6 614.267  31.760   1
   0   2   6 523.964  27.168   1
  -1  -2  -6 291.310  18.858   7
  -1  -2  -6 288.355  22.426   1
  -1  -2  -6 323.162  17.914   1
   1   2   6 336.949  19.982   1
   1   2   6 353.867  22.314   1
  -2  -2  -6 755.901  29.794   1
  -2  -2  -6 769.477  27.329   1
  -2  -2  -6 795.830  30.776   2
   2   2   6 808.981  30.426   1
   2   2   6 769.962  30.064   1
  -3  -2  -6 618.965  30.405   5
  -3  -2  -6 637.730  24.488   1
  -3  -2  -6 566.471  28.441   3
  -3  -2  -6 586.420  19.763   1
  -3  -2  -6 608.168  26.898   2
   3   2   6 610.824  42.820   7
   3   2   6 629.885  32.191   1
   3   2   6 615.722  25.119   1
  -4  -2  -6 28.9530  4.1207   1
  -4  -2  -6 24.5317  4.5124   3
  -4  -2  -6 28.3755  3.8865   1
  -4  -2  -6 39.2617  6.1870   5
  -4  -2  -6 41.5395  5.9359   2
   4   2   6 26.2183  4.2060   7
   4   2   6 25.3662  4.5120   1
   4   2   6 24.4128  3.2996   1
   4   2   6 32.0907  2.7777   6
  -5  -2  -6 133.753   7.437   1
  -5  -2  -6 124.833  10.234   5
  -5  -2  -6 134.726   7.092   1
  -5  -2  -6 116.722  11.386   2
  -5  -2  -6 133.639  11.221   3
   5   2   6 135.729   8.365   1
   5   2   6 133.843   8.762   1
  -6  -2  -6 8.69663 3.53065   1
  -6  -2  -6 0.88240 3.75879   5
  -6  -2  -6 13.6634  5.0151   2
  -6  -2  -6 17.7544  3.4692   1
   6   2   6 7.12101 3.16578   1
   6   2   6 9.06675 3.17033   1
   6   2   6 22.7125  5.5014   3
  -7  -2  -6 33.7646  4.6359   1
  -7  -2  -6 33.5938  5.5415   5
  -7  -2  -6 13.2910  7.6685   2
  -7  -2  -6 35.9350  5.6500   1
   7   2   6 32.8990  5.7246   3
   7   2   6 26.1705  4.7466   1
   7   2   6 23.5880  4.4463   1
  -8  -2  -6 337.464  37.852   1
  -8  -2  -6 319.175  21.181   5
  -8  -2  -6 308.088  25.937   1
  -8  -2  -6 265.770  24.771   2
   8   2   6 290.599  25.140   1
   8   2   6 317.927  37.575   3
   8   2   6 282.540  27.770   1
  -9  -2  -6 282.269  25.778   1
  -9  -2  -6 320.507  28.878   2
  -9  -2  -6 295.047  27.540   1
  -9  -2  -6 307.917  31.242   5
   9   2   6 294.827  32.474   1
   9   2   6 328.281  27.044   3
   9   2   6 260.754  27.874   1
 -10  -2  -6 14.1858  5.7925   1
 -10  -2  -6 20.7316  5.9848   6
 -10  -2  -6 26.6481  5.5806   1
  10   2   6 32.6116  6.3523   3
  10   2   6 24.5949  4.4562   1
  10   2   6 17.0170  4.9254   1
 -11  -2  -6 0.14817 3.09946   1
  11   2   6 -0.1139  7.5315   3
  11   2   6 2.49618 5.54133   1
 -12  -2  -6 35.8732  7.4456   1
  12   2   6 49.1390 13.6625   3
   8  -3  -6 12.2210 13.9589   1
  -8   3   6 24.1247 12.3208   1
   7  -3  -6 107.845  14.257   1
  -7   3   6 105.785  16.784   1
   6  -3  -6 236.848  26.333   5
   6  -3  -6 233.949  18.238   1
  -6   3   6 246.039  23.021   1
  -6   3   6 202.146  22.314   1
   5  -3  -6 119.812   9.645   5
   5  -3  -6 85.8132 10.7110   1
   5  -3  -6 110.608  15.421   1
  -5   3   6 106.559  16.748   1
  -5   3   6 99.8173 13.8948   1
  -5   3   6 120.530  10.578   4
   4  -3  -6 808.443  29.669   1
   4  -3  -6 740.998  54.114   5
   4  -3  -6 777.227  74.870   1
  -4   3   6 778.003  61.335   1
  -4   3   6 758.443  65.802   1
  -4   3   6 759.136  62.968   4
   3  -3  -6 624.747  49.709   1
   3  -3  -6 667.073  41.391   1
  -3   3   6 684.356  58.882   1
  -3   3   6 646.268  31.984   4
  -3   3   6 651.314  58.286   1
   2  -3  -6 232.644  18.266   1
   2  -3  -6 195.975  13.230   1
  -2   3   6 241.325  17.536   1
  -2   3   6 223.265  16.262   1
   1  -3  -6 134.486  11.250   5
   1  -3  -6 171.643  11.998   1
   1  -3  -6 132.112  13.972   1
  -1   3   6 154.842  12.131   1
  -1   3   6 170.562  12.419   1
   0  -3  -6 53.4833  4.9780   5
   0  -3  -6 38.9107  4.3927   2
   0  -3  -6 40.7419  6.9701   1
   0  -3  -6 43.0023  6.1184   1
   0   3   6 28.0836  6.5026   1
   0   3   6 50.9831  6.4819   1
  -1  -3  -6 2297.35  118.34   2
  -1  -3  -6 2128.79   77.80   5
  -1  -3  -6 2206.97   72.98   1
  -1  -3  -6 2186.28   61.72   1
  -1  -3  -6 2211.80   96.00   7
   1   3   6 2201.42   81.05   1
   1   3   6 2276.73   90.81   1
  -2  -3  -6 271.875  16.755   1
  -2  -3  -6 274.421  14.828   1
  -2  -3  -6 297.568  17.541   2
  -2  -3  -6 288.822  15.117   3
  -2  -3  -6 288.695  18.759   5
   2   3   6 284.195  19.604   1
   2   3   6 269.348  19.494   1
  -3  -3  -6 394.628  15.944   1
  -3  -3  -6 410.216  30.469   2
  -3  -3  -6 356.743  20.298   3
  -3  -3  -6 386.800  24.413   5
  -3  -3  -6 405.850  17.255   1
   3   3   6 364.932  22.334   7
   3   3   6 412.755  19.738   1
   3   3   6 383.571  18.841   1
  -4  -3  -6 150.001  13.589   5
  -4  -3  -6 131.593  12.209   2
  -4  -3  -6 138.651   6.693   1
  -4  -3  -6 133.543   9.388   3
  -4  -3  -6 146.705   9.836   1
   4   3   6 145.826  10.238   6
   4   3   6 146.115   9.855   1
   4   3   6 124.689   8.675   1
   4   3   6 134.408   9.634   7
  -5  -3  -6 6.27151 4.47573   5
  -5  -3  -6 1.53775 3.62453   2
  -5  -3  -6 1.12829 1.42844   1
  -5  -3  -6 2.59496 2.29069   1
   5   3   6 0.86031 2.46118   7
   5   3   6 -1.0088  1.3134   1
   5   3   6 1.20428 1.97396   1
   5   3   6 -4.4963  3.2364   3
  -6  -3  -6 301.556  27.451   2
  -6  -3  -6 320.500  24.764   5
  -6  -3  -6 299.553  16.467   1
   6   3   6 322.795  35.506   3
   6   3   6 323.197  20.889   1
   6   3   6 330.830  18.580   1
   6   3   6 333.693  21.010   6
  -7  -3  -6 13.7444  6.2242   2
  -7  -3  -6 21.6143  6.6311   5
  -7  -3  -6 26.3648  3.9615   1
   7   3   6 20.4683  3.1787   1
   7   3   6 20.8361  3.0152   1
   7   3   6 13.6120  6.0794   3
  -8  -3  -6 237.652  20.906   5
  -8  -3  -6 242.164  24.181   1
   8   3   6 236.428  28.981   1
   8   3   6 277.496  16.649   3
   8   3   6 259.985  22.317   1
  -9  -3  -6 10.6112  2.9503   1
   9   3   6 10.1222  6.2457   3
   9   3   6 7.02961 3.16887   1
   9   3   6 15.2605  3.5171   1
 -10  -3  -6 -2.2332  2.4685   1
 -10  -3  -6 8.03198 3.10991   1
  10   3   6 4.43499 6.09648   3
  10   3   6 1.41910 3.07048   1
 -11  -3  -6 118.268  12.196   1
  11   3   6 104.175  13.478   4
  11   3   6 114.735  17.235   3
 -12  -3  -6 0.85000 3.11734   1
  12   3   6 -2.5025  8.5756   3
   8  -4  -6 32.3403 13.7524   1
  -8   4   6  5.9213 12.0612   1
   7  -4  -6 16.8823  8.0231   1
  -7   4   6 12.9596  8.2707   1
   6  -4  -6 28.8251 11.0186   1
  -6   4   6 22.2208  9.0574   1
   5  -4  -6 37.9073  8.8008   1
   5  -4  -6 62.2717  7.2408   5
  -5   4   6 49.6848  5.1991   4
  -5   4   6 39.3525  8.6270   1
  -5   4   6 55.0222 10.6975   1
   4  -4  -6 6.24950 5.05225   1
   4  -4  -6 5.61094 2.49347   5
   4  -4  -6 -3.2373  5.6388   1
  -4   4   6 16.1541  7.3990   1
  -4   4   6 -0.7550  4.5939   1
  -4   4   6 7.83476 3.35261   4
   3  -4  -6 41.6401  4.1502   5
   3  -4  -6 26.5919  7.6355   1
   3  -4  -6 46.4650  8.6461   1
  -3   4   6 29.3305  7.7058   1
  -3   4   6 53.9813  8.5221   1
  -3   4   6 38.2898  4.4976   4
   2  -4  -6 153.064  12.233   5
   2  -4  -6 179.594  15.985   1
   2  -4  -6 159.558  13.990   1
  -2   4   6 146.630  10.059   1
  -2   4   6 167.462   9.353   4
  -2   4   6 204.162  17.736   1
   1  -4  -6 40.3492  6.5248   1
   1  -4  -6 36.8513  6.2929   1
   1  -4  -6 34.9558  4.3799   5
  -1   4   6 34.4191  6.5920   1
  -1   4   6 30.9298  5.4786   4
  -1   4   6 19.9998  4.8971   1
   0  -4  -6 1956.16   85.04   5
   0  -4  -6 1959.78  111.18   1
   0  -4  -6 2115.72   94.79   1
   0   4   6 2113.43   92.82   1
   0   4   6 1975.71   78.04   1
  -1  -4  -6 17.2804  2.9439   7
  -1  -4  -6 10.3093  3.8523   1
  -1  -4  -6 8.64798 3.18723   5
  -1  -4  -6 18.1429  3.4890   1
   1   4   6 7.74495 3.95342   1
   1   4   6 7.72348 2.82479   1
  -2  -4  -6 13.0714  3.6980   3
  -2  -4  -6 26.7372  3.7386   1
  -2  -4  -6 18.2109  3.5908   7
  -2  -4  -6 10.9848  5.3129   5
  -2  -4  -6 22.3086  4.0894   1
   2   4   6 22.2436  3.5939   1
   2   4   6 23.6025  4.3780   2
   2   4   6 33.2267  4.4050   1
  -3  -4  -6 876.415  38.006   5
  -3  -4  -6 886.266  50.695   1
  -3  -4  -6 863.710  37.926   1
  -3  -4  -6 885.770  49.252   3
   3   4   6 873.183  36.030   2
   3   4   6 948.517  49.690   1
   3   4   6 898.932  39.490   1
  -4  -4  -6 1058.63   84.69   1
  -4  -4  -6 1107.08   74.96   3
  -4  -4  -6 1103.02   44.00   5
   4   4   6 1093.28   53.54   5
   4   4   6 1039.89   43.53   3
   4   4   6 1143.96   88.01   7
   4   4   6 1179.57   75.93   1
   4   4   6 1071.36   35.73   2
   4   4   6 1096.22   63.14   1
  -5  -4  -6 265.341  17.020   5
  -5  -4  -6 277.359  22.302   1
   5   4   6 279.790  12.974   1
   5   4   6 235.721  14.276   2
   5   4   6 263.638  15.569   7
   5   4   6 245.329  11.673   6
   5   4   6 251.735  15.319   1
   5   4   6 277.915  20.487   5
   5   4   6 253.511  15.370   3
  -6  -4  -6 714.043  47.885   1
  -6  -4  -6 645.258  33.276   5
   6   4   6 762.379  32.431   1
   6   4   6 621.588  38.250   5
   6   4   6 650.888  32.349   2
   6   4   6 668.866  57.520   7
   6   4   6 706.764  61.454   3
   6   4   6 555.464  34.130   1
   6   4   6 629.858  60.643   6
  -7  -4  -6 10.8152  4.3686   5
   7   4   6 17.3752  6.4064   2
   7   4   6 21.3541  6.9862   3
   7   4   6 7.38303 4.33424   5
   7   4   6 6.70894 3.30391   6
   8   4   6 695.759  48.998   2
   8   4   6 631.228  38.457   5
   8   4   6 614.492  41.578   3
   9   4   6 471.907  44.382   4
   9   4   6 463.060  38.315   2
   9   4   6 367.800  40.455   5
   9   4   6 438.301  40.527   3
  10   4   6  1.7105 10.1752   3
  10   4   6 21.5591  6.4896   4
  11   4   6 294.924  28.989   3
  11   4   6 222.154  20.657   4
   8  -5  -6 69.1347 16.5787   1
  -8   5   6 59.8944 13.9311   1
   7  -5  -6 7.86524 8.47041   1
  -7   5   6 3.75517 7.64421   1
   6  -5  -6 4.83216 7.49130   1
  -6   5   6 -7.1367  6.7531   1
   5  -5  -6 32.4063  9.3420   1
   5  -5  -6 20.5843  8.0416   1
  -5   5   6 27.2423  9.0236   1
  -5   5   6 34.5773  5.5929   4
   4  -5  -6 18.0271  6.1345   1
   4  -5  -6 27.1837  7.2638   1
  -4   5   6 33.3688  6.4770   1
  -4   5   6 25.9623  6.1770   4
  -4   5   6 27.6807  6.6388   1
   3  -5  -6 12.8376  7.9145   1
   3  -5  -6 14.3514  6.0889   1
   3  -5  -6 11.6196  3.7916   5
  -3   5   6 22.2707  6.2003   1
  -3   5   6 12.4097  3.4288   4
  -3   5   6 12.4023  6.6350   1
   2  -5  -6 146.128  13.892   1
   2  -5  -6 145.402  11.376   5
   2  -5  -6 133.878   9.667   1
  -2   5   6 125.358  18.151   1
  -2   5   6 151.357  13.336   4
  -2   5   6 170.390  14.222   1
   1  -5  -6 1619.37   68.13   5
   1  -5  -6 1622.19   64.33   1
   1  -5  -6 1697.97  116.62   1
  -1   5   6 1730.39   91.45   1
  -1   5   6 1706.82  112.30   1
  -1   5   6 1681.64   81.62   4
   0  -5  -6 28.9616  4.9583   1
   0  -5  -6 36.9962  6.0548   5
   0  -5  -6 24.7966  4.4563   1
   0   5   6 26.1675  5.6207   1
   0   5   6 37.9612  5.6965   4
   0   5   6 40.5334  4.0860   2
   0   5   6 39.6158  4.8282   1
  -1  -5  -6 24.0046  4.5178   7
  -1  -5  -6 31.4587  5.6525   1
  -1  -5  -6 21.4331  5.0405   1
  -1  -5  -6 26.6989  6.2763   5
  -1  -5  -6 25.7950  5.2643   3
   1   5   6 21.9478  3.4918   1
   1   5   6 30.5568  5.6357   4
   1   5   6 25.3073  3.8930   2
   1   5   6 15.6345  5.0761   1
   1   5   6 17.5331  4.4391   5
  -2  -5  -6 85.5893  7.0309   1
  -2  -5  -6 64.9662  7.0959   7
  -2  -5  -6 59.9132  4.8492   1
  -2  -5  -6 52.9718  6.2542   5
   2   5   6 60.2358  6.5465   1
   2   5   6 67.3564  7.6212   5
   2   5   6 89.3599  7.3120   4
   2   5   6 61.8663  7.6043   2
   2   5   6 73.4427  5.1530   1
  -3  -5  -6 1.85542 3.19458   5
  -3  -5  -6 6.41198 1.94976   1
  -3  -5  -6 4.99461 1.62984   1
  -3  -5  -6 5.68276 4.38553   3
   3   5   6 5.63553 2.45512   1
   3   5   6 7.14097 4.36525   2
   3   5   6 8.96133 1.92650   1
   3   5   6 6.76561 4.37730   5
   3   5   6 3.75271 3.92891   4
  -4  -5  -6 181.884  13.092   1
  -4  -5  -6 160.009  11.247   5
  -4  -5  -6 187.802   7.066   1
   4   5   6 186.131  15.992   5
   4   5   6 183.409   7.494   1
   4   5   6 203.290  10.943   1
   4   5   6 164.982  12.858   2
   4   5   6 196.204  18.800   7
   4   5   6 198.330  13.898   4
   4   5   6 196.157  13.134   3
  -5  -5  -6 259.159  16.528   5
   5   5   6 212.376  24.539   7
   5   5   6 250.458  16.021   4
   5   5   6 214.259  16.736   6
   5   5   6 244.841  23.940   5
   5   5   6 220.212  18.668   3
   5   5   6 216.137  16.672   2
   6   5   6 63.2804  8.1387   4
   6   5   6 49.7831  8.6588   6
   6   5   6 65.5199  9.3375   3
   6   5   6 65.5163  7.8800   7
   6   5   6 60.9035  8.5378   2
   7   5   6 438.588  47.186   7
   7   5   6 452.984  33.011   4
   7   5   6 371.792  36.603   5
   7   5   6 393.616  39.098   6
   7   5   6 419.965  32.599   3
   7   5   6 446.462  38.106   2
   8   5   6 493.326  32.988   6
   8   5   6 324.247  43.609   5
   8   5   6 474.150  28.993   4
   8   5   6 392.889  35.677   7
   8   5   6 433.968  39.579   3
   8   5   6 506.940  34.419   2
   9   5   6 51.9244 10.8567   3
   9   5   6 58.6595  8.9063   4
   9   5   6 61.3169 10.7956   2
   9   5   6 34.5155 26.6063   5
  10   5   6 224.417  23.785   3
  10   5   6 302.174  20.436   2
  10   5   6 224.821  21.627   4
  11   5   6 44.4940 11.4604   3
   8  -6  -6 63.2818 14.9670   1
  -8   6   6 28.2878 12.3750   1
   7  -6  -6 11.7302 13.5822   1
  -7   6   6 20.6676 12.2260   1
   6  -6  -6  3.2986 10.4002   1
  -6   6   6 -6.9822  9.8581   1
   5  -6  -6 155.681  25.564   1
   5  -6  -6 128.307  14.367   1
  -5   6   6 130.253  14.080   4
  -5   6   6 172.878  19.488   1
   4  -6  -6 25.5527  8.3989   1
   4  -6  -6 17.5725  6.5053   1
  -4   6   6 12.2225  4.6193   4
  -4   6   6 16.7718  7.3210   1
  -4   6   6 17.4367  6.1246   1
   3  -6  -6 47.8416  8.9956   1
   3  -6  -6 41.6581  7.9178   1
  -3   6   6 39.2171  5.3115   4
  -3   6   6 26.3009  5.3677   1
   2  -6  -6 -0.7536  5.6562   1
   2  -6  -6 10.2975  5.0522   1
  -2   6   6 3.56977 1.14335   2
  -2   6   6 0.43333 3.98050   4
  -2   6   6 -0.7209  5.6280   1
   1  -6  -6 124.882  10.467   1
   1  -6  -6 131.733  14.264   1
  -1   6   6 141.838  10.452   2
  -1   6   6 142.442  12.946   1
  -1   6   6 140.186  16.835   4
   0  -6  -6 602.760  31.513   1
   0  -6  -6 636.089  40.224   3
   0  -6  -6 586.858  35.728   1
   0   6   6 607.971  32.227   1
   0   6   6 609.123  42.644   1
   0   6   6 562.224  34.955   5
   0   6   6 573.881  31.029   2
   0   6   6 582.925  32.997   4
  -1  -6  -6 165.697  12.796   3
  -1  -6  -6 177.485  13.970   1
  -1  -6  -6 156.956  13.474   1
  -1  -6  -6 166.739  10.967   7
   1   6   6 166.262  12.902   1
   1   6   6 133.998  16.310   5
   1   6   6 165.094  10.180   2
   1   6   6 178.913  11.900   4
   1   6   6 152.603  10.919   1
  -2  -6  -6 62.4112  6.4376   7
  -2  -6  -6 68.1274  5.1748   1
  -2  -6  -6 68.0275  6.6501   1
  -2  -6  -6 92.3939  8.2557   3
   2   6   6 77.7267  6.5238   2
   2   6   6 78.9011  8.0719   1
   2   6   6 71.2269  9.4122   5
   2   6   6 83.8649  7.8902   4
   2   6   6 69.0651  7.7944   1
  -3  -6  -6 10.8125  2.4262   1
  -3  -6  -6 11.8558  2.2412   1
  -3  -6  -6 18.2806  3.7879   7
   3   6   6 12.8619  4.9848   4
   3   6   6 11.8274  2.4343   1
   3   6   6 10.3680  2.5203   1
   3   6   6 18.8624  5.6859   2
   3   6   6 14.6633  5.4187   5
  -4  -6  -6 19.0094  1.8208   1
  -4  -6  -6 17.0859  1.8557   1
   4   6   6 16.4464  2.3090   1
   4   6   6 21.3473  5.5917   4
   4   6   6 23.9302  5.8900   2
   4   6   6 18.5350  5.3667   3
   4   6   6 17.4284  5.5290   5
   4   6   6 10.4682  4.8967   7
   4   6   6 14.6357  1.3838   1
   5   6   6 59.2687  8.7713   3
   5   6   6 52.3608  6.2622   4
   5   6   6 38.9841  7.9341   2
   5   6   6 31.6814  6.3651   5
   5   6   6 25.3463  7.2863   7
   5   6   6 49.0481  6.7737   6
   6   6   6 503.212  40.615   5
   6   6   6 551.465  49.385   2
   6   6   6 506.708  25.529   6
   6   6   6 571.198  56.307   7
   6   6   6 485.046  24.076   4
   6   6   6 517.842  38.014   3
   7   6   6 11.3120  7.3772   5
   7   6   6 17.2078  6.0888   7
   7   6   6 20.9332  7.1103   4
   7   6   6 8.24072 4.89049   6
   7   6   6 2.21261 7.59050   2
   7   6   6 2.14928 5.56473   3
   8   6   6 187.383  19.580   6
   8   6   6 179.153  20.815   4
   8   6   6 202.486  18.164   3
   8   6   6 202.288  23.297   2
   9   6   6 232.243  22.532   4
   9   6   6 268.761  23.223   3
   9   6   6 252.680  29.921   2
   9   6   6 284.592  26.422   6
  10   6   6 105.602  18.511   3
  10   6   6 101.777  14.724   4
  10   6   6 118.071  16.493   2
   7  -7  -6 226.931  26.724   1
  -7   7   6 280.691  30.319   1
   6  -7  -6 0.55330 8.14168   1
  -6   7   6 1.26508 7.09349   1
   5  -7  -6 31.4071  9.7119   1
   5  -7  -6 21.8795  8.8981   1
  -5   7   6 38.4966 12.0354   1
   4  -7  -6 -0.3712  5.6721   1
   4  -7  -6 2.27730 7.60147   1
  -4   7   6 6.71871 5.49078   4
  -4   7   6 7.12758 4.92448   1
   3  -7  -6 130.172  19.237   1
   3  -7  -6 95.8598 12.7100   1
  -3   7   6 110.487  11.548   1
  -3   7   6 124.711  11.527   4
  -3   7   6 126.117  11.635   2
  -3   7   6 109.010  14.022   1
   2  -7  -6 19.0912  4.4492   3
   2  -7  -6 22.1541  5.8727   1
   2  -7  -6 26.3902  8.2649   1
  -2   7   6 14.5197  4.9182   4
  -2   7   6 15.3911  5.8009   1
  -2   7   6 27.4336  7.0054   1
   1  -7  -6 -3.6168  4.9250   1
   1  -7  -6 4.88366 3.45400   1
   1  -7  -6 -5.3528  4.9888   3
  -1   7   6 5.68044 4.06791   4
  -1   7   6 5.22371 3.94961   1
  -1   7   6 3.91334 4.96394   5
  -1   7   6 2.09270 5.95745   1
   0  -7  -6 3.85233 3.18820   7
   0  -7  -6 -1.4229  4.6469   3
   0  -7  -6 2.32123 2.83918   1
   0  -7  -6 -5.0261  3.1270   1
   0   7   6 2.41751 3.59326   5
   0   7   6 -0.8425  3.0578   1
   0   7   6 -1.8964  5.3132   4
   0   7   6 0.56951 3.28962   1
  -1  -7  -6 190.105  16.022   7
  -1  -7  -6 199.501  18.004   1
  -1  -7  -6 194.110  12.256   1
  -1  -7  -6 211.607  16.930   3
   1   7   6 216.366  24.189   1
   1   7   6 211.761  15.560   4
   1   7   6 195.202  21.150   1
   1   7   6 192.480  17.385   5
  -2  -7  -6 629.527  43.328   1
  -2  -7  -6 641.455  36.867   7
  -2  -7  -6 561.409  37.107   1
   2   7   6 598.927  29.788   1
   2   7   6 598.328  43.498   2
   2   7   6 590.630  50.502   5
   2   7   6 591.934  30.922   4
   2   7   6 611.430  36.686   1
  -3  -7  -6 32.2498  5.9830   7
  -3  -7  -6 50.7514  4.7765   1
   3   7   6 43.6615  7.0958   5
   3   7   6 40.0856  8.9904   4
   3   7   6 43.3161  5.1644   1
   3   7   6 63.0635  5.2462   1
   3   7   6 55.6680  7.5774   2
   4   7   6 8.08553 4.99816   2
   4   7   6 -6.4547  4.0507   3
   4   7   6 -1.8868  5.2397   5
   4   7   6 -1.6967  3.5981   4
   5   7   6 5.38576 4.34962   4
   5   7   6 2.67201 4.91014   3
   5   7   6 0.79641 4.55913   2
   5   7   6 4.32124 5.35620   5
   5   7   6 4.70788 4.87740   7
   5   7   6 3.50345 3.94485   6
   6   7   6 553.714  56.079   7
   6   7   6 536.763  36.512   2
   6   7   6 524.867  33.910   3
   6   7   6 650.994  55.807   6
   6   7   6 479.967  58.615   4
   6   7   6 520.972  41.271   5
   7   7   6 -6.6423  5.0894   3
   7   7   6 3.58287 7.20505   2
   7   7   6 2.03988 5.29293   6
   7   7   6 3.24502 4.05649   4
   8   7   6 0.26529 5.15964   4
   8   7   6 20.0520 10.1288   2
   8   7   6 2.05601 6.00824   6
   8   7   6 -0.0784  5.6163   3
   9   7   6 122.981  20.526   3
   9   7   6 148.416  15.027   4
   9   7   6 135.648  18.676   6
   9   7   6 190.546  22.342   2
  10   7   6 0.65716 7.63350   4
  10   7   6 11.9184 11.3012   3
  10   7   6 3.28172 8.20879   2
   7  -8  -6  7.1229 12.4383   1
  -7   8   6  8.1104 13.3417   1
   6  -8  -6 14.3139  9.2370   1
  -6   8   6 21.2812  9.4923   1
   5  -8  -6 277.086  23.919   1
  -5   8   6 241.503  27.305   1
   4  -8  -6 168.307  21.736   1
   4  -8  -6 135.938  11.805   1
  -4   8   6 139.864  18.207   2
   3  -8  -6 27.6955  8.0165   1
   3  -8  -6 21.6314  7.8551   1
   3  -8  -6 40.5913  7.1761   3
  -3   8   6 22.8995  6.2910   4
  -3   8   6 6.44947 9.21319   1
   2  -8  -6 8.56013 4.38578   1
   2  -8  -6 12.4661  7.2549   1
   2  -8  -6 4.78290 3.71321   3
  -2   8   6 6.46659 3.97724   4
  -2   8   6 1.50712 5.54008   1
  -2   8   6 11.0918  5.9130   5
  -2   8   6 10.0269  7.9476   1
   1  -8  -6 29.4235  7.3566   1
   1  -8  -6 22.1208  6.7437   3
   1  -8  -6 27.7778  5.0303   1
  -1   8   6 10.9979  6.4506   1
  -1   8   6 37.4729  7.7702   1
  -1   8   6 22.8442  7.3886   4
  -1   8   6 17.3513  7.6999   5
   0  -8  -6 15.2433  4.7550   1
   0  -8  -6 15.6386  5.8832   1
   0  -8  -6 4.09292 3.67693   7
   0  -8  -6 22.4670  5.9812   3
   0   8   6 7.32176 4.01299   1
   0   8   6 7.20463 5.60174   4
   0   8   6 18.8378  6.9164   5
   0   8   6 12.6941  5.8238   1
  -1  -8  -6 1896.69  100.98   1
  -1  -8  -6 1692.00  108.78   7
  -1  -8  -6 1799.40   91.89   1
   1   8   6 1774.26   98.53   4
   1   8   6 1761.30  125.22   1
   1   8   6 1939.38  153.05   5
   1   8   6 1851.93  104.80   1
  -2  -8  -6 5.14195 4.62412   7
  -2  -8  -6 2.33868 3.46179   1
  -2  -8  -6 9.97782 3.52914   1
   2   8   6 2.91254 3.20222   1
   2   8   6 0.71729 3.24799   1
   2   8   6 3.41344 5.35603   4
   2   8   6 -2.4857  4.7874   5
  -3  -8  -6 513.393  42.285   7
  -3  -8  -6 469.840  44.290   1
   3   8   6 533.732  32.330   1
   3   8   6 561.585  40.102   5
   3   8   6 475.073  26.436   3
   3   8   6 547.987  46.560   1
   3   8   6 527.163  41.935   4
  -4  -8  -6 150.809  13.157   1
   4   8   6 130.742  16.072   1
   4   8   6 178.211  19.173   4
   4   8   6 192.448  18.945   3
   4   8   6 218.869  17.391   1
   4   8   6 185.224  24.250   5
   4   8   6 187.599  17.609   2
   5   8   6 139.850  18.604   5
   5   8   6 153.625  17.632   7
   5   8   6 168.562  14.992   3
   5   8   6 172.956  15.784   6
   5   8   6 181.155  22.415   4
[truncated: 170,179 more chars]
