# Supplementary material for: Structural (XRD) Characterization and an Analysis of H-Bonding Motifs in Some Tetrahydroxidohexaoxidopentaborate(1-) Salts of N-Substituted Guanidinium Cations
Source: Molecules. 2023 Apr 6;28(7):3273. doi: 10.3390/molecules28073273 (PMC10096507; doi:10.3390/molecules28073273)
Supplement: Supplementary file 1 [file molecules-28-03273-s001.zip › MAB5.cif]

data_MAB5

#2019ncs0283_1b

_audit_creation_date               2019-05-24
_audit_creation_method
;
Olex2 1.2
(compiled 2018.05.29 svn.r3508 for OlexSys, GUI svn.r5506)
;
_shelx_SHELXL_version_number       '2018/3'
_audit_contact_author_address      ?
_audit_contact_author_email        ?
_audit_contact_author_name         ''
_audit_contact_author_phone        ?
_publ_contact_author_id_orcid      ?
_publ_section_references
;
Dolomanov, O.V., Bourhis, L.J., Gildea, R.J, Howard, J.A.K. & Puschmann, H.
 (2009), J. Appl. Cryst. 42, 339-341.

Sheldrick, G.M. (2015). Acta Cryst. C71, 3-8.
;
_chemical_name_common              ?
_chemical_name_systematic          ?
_chemical_formula_moiety           'C6 H16 N3, B5 H4 O10, B H3 O3'
_chemical_formula_sum              'C6 H23 B6 N3 O13'
_chemical_formula_weight           410.13
_chemical_melting_point            ?
_chemical_oxdiff_formula           'C6 H20 N3 B5 O10'
_chemical_oxdiff_usercomment       MAB/TR/Me5GuanB5
loop_
  _atom_type_symbol
  _atom_type_description
  _atom_type_scat_dispersion_real
  _atom_type_scat_dispersion_imag
  _atom_type_scat_source
 'C' 'C' 0.0181 0.0091 'International Tables Vol C Tables 4.2.6.8 and 6.1.1.4'
 'H' 'H' 0.0000 0.0000 'International Tables Vol C Tables 4.2.6.8 and 6.1.1.4'
 'B' 'B' 0.0090 0.0039 'International Tables Vol C Tables 4.2.6.8 and 6.1.1.4'
 'N' 'N' 0.0311 0.0180 'International Tables Vol C Tables 4.2.6.8 and 6.1.1.4'
 'O' 'O' 0.0492 0.0322 'International Tables Vol C Tables 4.2.6.8 and 6.1.1.4'

_shelx_space_group_comment
;
The symmetry employed for this shelxl refinement is uniquely defined
by the following loop, which should always be used as a source of
symmetry information in preference to the above space-group names.
They are only intended as comments.
;
_space_group_crystal_system        'monoclinic'
_space_group_IT_number             14
_space_group_name_H-M_alt          'P 1 21/c 1'
_space_group_name_Hall             '-P 2ybc'
loop_
  _space_group_symop_operation_xyz
 'x, y, z'
 '-x, y+1/2, -z+1/2'
 '-x, -y, -z'
 'x, -y-1/2, z-1/2'

_cell_length_a                     9.49570(10)
_cell_length_b                     11.44900(10)
_cell_length_c                     16.84590(10)
_cell_angle_alpha                  90
_cell_angle_beta                   98.0710(10)
_cell_angle_gamma                  90
_cell_volume                       1813.28(3)
_cell_formula_units_Z              4
_cell_measurement_reflns_used      17068
_cell_measurement_temperature      100(2)
_cell_measurement_theta_max        70.0370
_cell_measurement_theta_min        4.6590
_shelx_estimated_absorpt_T_max     0.913
_shelx_estimated_absorpt_T_min     0.784
_exptl_absorpt_coefficient_mu      1.164
_exptl_absorpt_correction_T_max    1.00000
_exptl_absorpt_correction_T_min    0.80386
_exptl_absorpt_correction_type     multi-scan
_exptl_absorpt_process_details
;
CrysAlisPro 1.171.40.45a (Rigaku Oxford Diffraction, 2019)
Empirical absorption correction using spherical harmonics,
 implemented in SCALE3 ABSPACK scaling algorithm.
;
_exptl_absorpt_special_details     ?
_exptl_crystal_colour              colourless
_exptl_crystal_colour_primary      colourless
_exptl_crystal_density_diffrn      1.502
_exptl_crystal_density_meas        ?
_exptl_crystal_density_method      ?
_exptl_crystal_description         block
_exptl_crystal_F_000               856
_exptl_crystal_recrystallization_method  'The material was crystallised'
_exptl_crystal_size_max            0.22
_exptl_crystal_size_mid            0.18
_exptl_crystal_size_min            0.08
_exptl_transmission_factor_max     ?
_exptl_transmission_factor_min     ?
_diffrn_reflns_av_R_equivalents    0.0196
_diffrn_reflns_av_unetI/netI       0.0108
_diffrn_reflns_Laue_measured_fraction_full  0.987
_diffrn_reflns_Laue_measured_fraction_max  0.986
_diffrn_reflns_limit_h_max         11
_diffrn_reflns_limit_h_min         -11
_diffrn_reflns_limit_k_max         13
_diffrn_reflns_limit_k_min         -13
_diffrn_reflns_limit_l_max         20
_diffrn_reflns_limit_l_min         -19
_diffrn_reflns_number              20493
_diffrn_reflns_point_group_measured_fraction_full  0.987
_diffrn_reflns_point_group_measured_fraction_max  0.986
_diffrn_reflns_theta_full          67.679
_diffrn_reflns_theta_max           68.239
_diffrn_reflns_theta_min           4.685
_diffrn_ambient_environment        N~2~
_diffrn_ambient_temperature        100(2)
_diffrn_detector                   'hybrid pixel detector'
_diffrn_detector_area_resol_mean   10
_diffrn_detector_dtime             0.000
_diffrn_detector_type              'Rigaku, HyPix 6000'
_diffrn_measured_fraction_theta_full  0.987
_diffrn_measured_fraction_theta_max  0.986
_diffrn_measurement_details
;
List of Runs (angles in degrees, time in seconds):

  # Type    Start    End  Width  t~exp~   \w     \q     \k     \f   Frames
--------------------------------------------------------------------------
  1  \w    -84.00  94.00   0.50    0.50    --    5.00  20.00-120.00  356
  2  \w   -141.00  37.00   0.50    0.50    --  -52.10  20.00 -90.00  356
  3  \w   -179.00  -1.00   0.50    0.50    --  -90.00  49.00  90.00  356
  4  \w   -179.00  -1.00   0.50    0.50    --  -90.00  59.00-155.32  356
  5  \w   -179.00  -1.00   0.50    0.50    --  -90.00  59.00-155.32  356
  6  \w   -179.00 -27.00   0.50    0.50    --  -90.00  57.00 -39.41  304
  7  \w   -140.00-114.00   0.50    0.50    --  -90.00  20.00 -90.00   52
  8  \w    -53.00 -12.00   0.50    0.50    --  -90.00  20.00 -90.00   82
  9  \w   -177.00  -3.00   0.50    0.50    --  -90.00  59.00-104.30  348
 10  \w   -176.00-130.00   0.50    0.50    --  -90.00  58.00   0.97   92
 11  \w   -125.00  -1.00   0.50    0.50    --  -90.00  59.00  34.06  248
;
_diffrn_measurement_device         'four-circle diffractometer'
_diffrn_measurement_device_details  'Rigaku, AFC11 quarter \c goniometer'
_diffrn_measurement_device_type   
 'Rigaku 007HF equipped with Varimax confocal mirrors and an AFC11 goniometer and HyPix 6000 detector'
_diffrn_measurement_method         'profile data from \w-scans'
_diffrn_measurement_specimen_support  'MiTeGen loops'
_diffrn_orient_matrix_type        
 'CrysAlisPro convention (1999,Acta A55,543-557)'
_diffrn_orient_matrix_UB_11        0.0113831000
_diffrn_orient_matrix_UB_12        -0.1337297000
_diffrn_orient_matrix_UB_13        -0.0070899000
_diffrn_orient_matrix_UB_21        -0.0410891000
_diffrn_orient_matrix_UB_22        -0.0138022000
_diffrn_orient_matrix_UB_23        0.0847697000
_diffrn_orient_matrix_UB_31        -0.1582107000
_diffrn_orient_matrix_UB_32        -0.0060691000
_diffrn_orient_matrix_UB_33        -0.0359689000
_diffrn_radiation_collimation      'Varimax focusing mirrors'
_diffrn_radiation_monochromator    mirror
_diffrn_radiation_probe            x-ray
_diffrn_radiation_type             CuK\a
_diffrn_radiation_wavelength       1.54178
_diffrn_radiation_wavelength_determination  fundamental
_diffrn_source                     'Rotating anode'
_diffrn_source_current             30.0
_diffrn_source_power               1.2
_diffrn_source_target              Cu
_diffrn_source_type                'Rigaku 007 HF'
_diffrn_source_voltage             40.0
_reflns_Friedel_coverage           0.000
_reflns_Friedel_fraction_full      .
_reflns_Friedel_fraction_max       .
_reflns_number_gt                  3208
_reflns_number_total               3281
_reflns_odcompleteness_completeness  98.63
_reflns_odcompleteness_iscentric   1
_reflns_odcompleteness_theta       68.13
_reflns_special_details
;
 Reflections were merged by SHELXL according to the crystal
 class for the calculation of statistics and refinement.
 
 _reflns_Friedel_fraction is defined as the number of unique
 Friedel pairs measured divided by the number that would be
 possible theoretically, ignoring centric projections and
 systematic absences.
;
_reflns_threshold_expression       'I > 2\s(I)'
_computing_cell_refinement         'CrysAlisPro 1.171.40.45a (Rigaku OD, 2019)'
_computing_data_collection         'CrysAlisPro 1.171.40.45a (Rigaku OD, 2019)'
_computing_data_reduction          'CrysAlisPro 1.171.40.45a (Rigaku OD, 2019)'
_computing_molecular_graphics      'Olex2 (Dolomanov et al., 2009)'
_computing_publication_material    'Olex2 (Dolomanov et al., 2009)'
_computing_structure_refinement    'ShelXL (Sheldrick, 2015)'
_computing_structure_solution      'ShelXT (Sheldrick, 2015)'
_refine_diff_density_max           0.308
_refine_diff_density_min           -0.168
_refine_diff_density_rms           0.032
_refine_ls_extinction_coef         .
_refine_ls_extinction_method       none
_refine_ls_goodness_of_fit_ref     1.004
_refine_ls_hydrogen_treatment      mixed
_refine_ls_matrix_type             full
_refine_ls_number_parameters       290
_refine_ls_number_reflns           3281
_refine_ls_number_restraints       0
_refine_ls_R_factor_all            0.0268
_refine_ls_R_factor_gt             0.0263
_refine_ls_restrained_S_all        1.004
_refine_ls_shift/su_max            0.001
_refine_ls_shift/su_mean           0.000
_refine_ls_structure_factor_coef   Fsqd
_refine_ls_weighting_details      
 'w=1/[\s^2^(Fo^2^)+(0.0340P)^2^+0.7419P] where P=(Fo^2^+2Fc^2^)/3'
_refine_ls_weighting_scheme        calc
_refine_ls_wR_factor_gt            0.0670
_refine_ls_wR_factor_ref           0.0674
_refine_special_details            ?
_olex2_refinement_description
;
1. Fixed Uiso
 At 1.5 times of:
  All C(H,H,H) groups
2.a Idealised Me refined as rotating group:
 C2(H2A,H2B,H2C), C3(H3A,H3B,H3C), C4(H4A,H4B,H4C), C5(H5A,H5B,H5C), C6(H6A,
 H6B,H6C)
;
_atom_sites_solution_hydrogens     mixed
_atom_sites_solution_primary       dual
_atom_sites_solution_secondary     ?
loop_
  _atom_site_label
  _atom_site_type_symbol
  _atom_site_fract_x
  _atom_site_fract_y
  _atom_site_fract_z
  _atom_site_U_iso_or_equiv
  _atom_site_adp_type
  _atom_site_occupancy
  _atom_site_site_symmetry_order
  _atom_site_calc_flag
  _atom_site_refinement_flags_posn
  _atom_site_refinement_flags_adp
  _atom_site_refinement_flags_occupancy
  _atom_site_disorder_assembly
  _atom_site_disorder_group
 N1 N 0.51768(10) 0.50252(8) 0.13167(6) 0.0214(2) Uani 1 1 d . . . . .
 H1 H 0.5865(17) 0.5261(14) 0.1701(10) 0.038(4) Uiso 1 1 d . . . . .
 N2 N 0.27287(10) 0.51871(8) 0.09838(5) 0.0205(2) Uani 1 1 d . . . . .
 N3 N 0.40902(9) 0.68184(8) 0.13951(5) 0.0199(2) Uani 1 1 d . . . . .
 C1 C 0.40001(11) 0.56757(9) 0.12367(6) 0.0168(2) Uani 1 1 d . . . . .
 C2 C 0.53700(13) 0.39732(10) 0.08554(7) 0.0269(3) Uani 1 1 d . . . . .
 H2A H 0.468870 0.397506 0.036120 0.040 Uiso 1 1 calc GR . . . .
 H2B H 0.521029 0.328239 0.117456 0.040 Uiso 1 1 calc GR . . . .
 H2C H 0.634066 0.395534 0.072060 0.040 Uiso 1 1 calc GR . . . .
 C3 C 0.24006(14) 0.39952(10) 0.12095(8) 0.0304(3) Uani 1 1 d . . . . .
 H3A H 0.244576 0.347122 0.075376 0.046 Uiso 1 1 calc GR . . . .
 H3B H 0.144242 0.397193 0.136218 0.046 Uiso 1 1 calc GR . . . .
 H3C H 0.309356 0.374353 0.166381 0.046 Uiso 1 1 calc GR . . . .
 C4 C 0.16253(12) 0.58049(11) 0.04538(7) 0.0251(3) Uani 1 1 d . . . . .
 H4A H 0.079800 0.593035 0.073171 0.038 Uiso 1 1 calc GR . . . .
 H4B H 0.134310 0.533804 -0.003006 0.038 Uiso 1 1 calc GR . . . .
 H4C H 0.199448 0.656076 0.030390 0.038 Uiso 1 1 calc GR . . . .
 C5 C 0.29573(12) 0.74493(10) 0.17199(7) 0.0241(2) Uani 1 1 d . . . . .
 H5A H 0.249145 0.798880 0.131368 0.036 Uiso 1 1 calc GR . . . .
 H5B H 0.336515 0.789108 0.219542 0.036 Uiso 1 1 calc GR . . . .
 H5C H 0.225703 0.689042 0.186793 0.036 Uiso 1 1 calc GR . . . .
 C6 C 0.54165(12) 0.74646(10) 0.13866(7) 0.0248(3) Uani 1 1 d . . . . .
 H6A H 0.590001 0.755404 0.193660 0.037 Uiso 1 1 calc GR . . . .
 H6B H 0.520498 0.823744 0.114928 0.037 Uiso 1 1 calc GR . . . .
 H6C H 0.603320 0.703551 0.106807 0.037 Uiso 1 1 calc GR . . . .
 O1 O 0.99074(7) 0.49501(6) 0.27392(4) 0.01419(16) Uani 1 1 d . . . . .
 O2 O 0.86357(8) 0.60047(6) 0.16399(4) 0.01571(16) Uani 1 1 d . . . . .
 O3 O 0.99822(7) 0.70545(6) 0.27121(4) 0.01423(16) Uani 1 1 d . . . . .
 O4 O 0.89742(7) 0.60621(6) 0.37501(4) 0.01417(16) Uani 1 1 d . . . . .
 O5 O 1.06066(7) 0.63696(6) 0.49396(4) 0.01654(16) Uani 1 1 d . . . . .
 O6 O 1.15214(7) 0.59868(6) 0.37104(4) 0.01374(16) Uani 1 1 d . . . . .
 O7 O 0.86888(8) 0.39698(7) 0.15958(4) 0.01966(18) Uani 1 1 d . . . . .
 H7 H 0.9046(17) 0.3354(15) 0.1826(10) 0.039(4) Uiso 1 1 d . . . . .
 O8 O 0.88641(8) 0.80353(6) 0.15462(4) 0.01650(16) Uani 1 1 d . . . . .
 H8 H 0.9244(17) 0.8646(15) 0.1779(10) 0.037(4) Uiso 1 1 d . . . . .
 O9 O 0.81076(7) 0.63954(7) 0.49624(4) 0.01650(16) Uani 1 1 d . . . . .
 H9 H 0.8345(17) 0.6594(14) 0.5454(10) 0.041(4) Uiso 1 1 d . . . . .
 O10 O 1.30500(8) 0.63437(7) 0.49413(4) 0.01988(17) Uani 1 1 d . . . . .
 H10 H 1.3751(19) 0.6226(15) 0.4673(10) 0.045(5) Uiso 1 1 d . . . . .
 B1 B 1.01124(12) 0.60095(9) 0.32350(7) 0.0130(2) Uani 1 1 d . . . . .
 B2 B 0.90830(12) 0.49573(10) 0.20079(7) 0.0143(2) Uani 1 1 d . . . . .
 B3 B 0.91696(12) 0.70419(10) 0.19798(7) 0.0135(2) Uani 1 1 d . . . . .
 B4 B 0.92386(12) 0.62688(10) 0.45482(7) 0.0136(2) Uani 1 1 d . . . . .
 B5 B 1.17456(12) 0.62203(10) 0.45130(7) 0.0148(2) Uani 1 1 d . . . . .
 O11 O 0.63726(8) 0.55228(8) 0.29800(5) 0.02399(19) Uani 1 1 d . . . . .
 H11 H 0.718(2) 0.5688(16) 0.3258(11) 0.049(5) Uiso 1 1 d . . . . .
 O12 O 0.39313(8) 0.54173(7) 0.29745(4) 0.02108(18) Uani 1 1 d . . . . .
 H12 H 0.3248(19) 0.5568(15) 0.3235(10) 0.041(4) Uiso 1 1 d . . . . .
 O13 O 0.53568(8) 0.59757(7) 0.41766(4) 0.01980(17) Uani 1 1 d . . . . .
 H13 H 0.620(2) 0.6085(15) 0.4412(11) 0.046(5) Uiso 1 1 d . . . . .
 B11 B 0.52383(12) 0.56382(10) 0.33889(7) 0.0168(2) Uani 1 1 d . . . . .

loop_
  _atom_site_aniso_label
  _atom_site_aniso_U_11
  _atom_site_aniso_U_22
  _atom_site_aniso_U_33
  _atom_site_aniso_U_23
  _atom_site_aniso_U_13
  _atom_site_aniso_U_12
 N1 0.0183(5) 0.0236(5) 0.0208(5) -0.0035(4) -0.0028(4) 0.0011(4)
 N2 0.0176(5) 0.0213(5) 0.0222(5) 0.0004(4) 0.0014(4) -0.0032(4)
 N3 0.0188(5) 0.0200(5) 0.0206(4) -0.0010(4) 0.0018(3) -0.0011(4)
 C1 0.0176(5) 0.0209(5) 0.0116(5) 0.0005(4) 0.0015(4) -0.0011(4)
 C2 0.0240(6) 0.0267(6) 0.0293(6) -0.0064(5) 0.0017(5) 0.0035(5)
 C3 0.0280(6) 0.0236(6) 0.0412(7) -0.0007(5) 0.0100(5) -0.0072(5)
 C4 0.0154(5) 0.0353(6) 0.0235(6) 0.0010(5) -0.0011(4) -0.0011(5)
 C5 0.0269(6) 0.0234(6) 0.0227(6) -0.0008(4) 0.0058(5) 0.0052(5)
 C6 0.0214(6) 0.0229(6) 0.0286(6) -0.0017(5) -0.0015(5) -0.0055(4)
 O1 0.0158(4) 0.0128(4) 0.0132(3) -0.0005(3) -0.0002(3) 0.0010(3)
 O2 0.0175(4) 0.0136(4) 0.0146(3) 0.0000(3) -0.0026(3) 0.0004(3)
 O3 0.0165(3) 0.0129(4) 0.0127(3) 0.0007(3) 0.0000(3) -0.0009(3)
 O4 0.0116(3) 0.0181(4) 0.0125(3) -0.0003(3) 0.0006(3) -0.0002(3)
 O5 0.0130(4) 0.0231(4) 0.0131(3) -0.0027(3) 0.0003(3) -0.0005(3)
 O6 0.0121(3) 0.0158(4) 0.0130(3) -0.0001(3) 0.0005(3) 0.0005(3)
 O7 0.0255(4) 0.0133(4) 0.0177(4) -0.0007(3) -0.0053(3) 0.0011(3)
 O8 0.0208(4) 0.0131(4) 0.0143(3) 0.0007(3) -0.0021(3) -0.0018(3)
 O9 0.0139(4) 0.0231(4) 0.0121(3) -0.0024(3) 0.0005(3) 0.0000(3)
 O10 0.0129(4) 0.0304(4) 0.0160(4) -0.0047(3) 0.0005(3) -0.0005(3)
 B1 0.0137(5) 0.0126(5) 0.0126(5) 0.0002(4) 0.0010(4) 0.0001(4)
 B2 0.0126(5) 0.0160(6) 0.0143(5) 0.0001(4) 0.0017(4) 0.0002(4)
 B3 0.0118(5) 0.0159(5) 0.0131(5) 0.0000(4) 0.0026(4) 0.0002(4)
 B4 0.0142(5) 0.0116(5) 0.0144(5) 0.0006(4) 0.0004(4) 0.0001(4)
 B5 0.0149(5) 0.0135(5) 0.0156(5) -0.0002(4) 0.0009(4) -0.0001(4)
 O11 0.0132(4) 0.0417(5) 0.0167(4) -0.0046(3) 0.0007(3) -0.0023(3)
 O12 0.0129(4) 0.0328(4) 0.0173(4) -0.0023(3) 0.0013(3) -0.0012(3)
 O13 0.0122(4) 0.0300(4) 0.0166(4) -0.0025(3) -0.0001(3) 0.0010(3)
 B11 0.0158(6) 0.0172(6) 0.0168(5) 0.0017(4) 0.0004(4) 0.0004(4)

_geom_special_details
;
 All esds (except the esd in the dihedral angle between two l.s. planes)
 are estimated using the full covariance matrix.  The cell esds are taken
 into account individually in the estimation of esds in distances, angles
 and torsion angles; correlations between esds in cell parameters are only
 used when they are defined by crystal symmetry.  An approximate (isotropic)
 treatment of cell esds is used for estimating esds involving l.s. planes.
;
loop_
  _geom_bond_atom_site_label_1
  _geom_bond_atom_site_label_2
  _geom_bond_distance
  _geom_bond_site_symmetry_2
  _geom_bond_publ_flag
 N1 H1 0.894(17) . ?
 N1 C1 1.3338(14) . ?
 N1 C2 1.4589(15) . ?
 N2 C1 1.3444(14) . ?
 N2 C3 1.4619(15) . ?
 N2 C4 1.4603(15) . ?
 N3 C1 1.3355(14) . ?
 N3 C5 1.4642(14) . ?
 N3 C6 1.4625(14) . ?
 C2 H2A 0.9800 . ?
 C2 H2B 0.9800 . ?
 C2 H2C 0.9800 . ?
 C3 H3A 0.9800 . ?
 C3 H3B 0.9800 . ?
 C3 H3C 0.9800 . ?
 C4 H4A 0.9800 . ?
 C4 H4B 0.9800 . ?
 C4 H4C 0.9800 . ?
 C5 H5A 0.9800 . ?
 C5 H5B 0.9800 . ?
 C5 H5C 0.9800 . ?
 C6 H6A 0.9800 . ?
 C6 H6B 0.9800 . ?
 C6 H6C 0.9800 . ?
 O1 B1 1.4700(13) . ?
 O1 B2 1.3638(14) . ?
 O2 B2 1.3889(13) . ?
 O2 B3 1.3833(13) . ?
 O3 B1 1.4805(13) . ?
 O3 B3 1.3602(13) . ?
 O4 B1 1.4792(13) . ?
 O4 B4 1.3535(13) . ?
 O5 B4 1.3765(13) . ?
 O5 B5 1.3906(13) . ?
 O6 B1 1.4599(13) . ?
 O6 B5 1.3652(13) . ?
 O7 H7 0.852(18) . ?
 O7 B2 1.3518(14) . ?
 O8 H8 0.857(18) . ?
 O8 B3 1.3608(13) . ?
 O9 H9 0.858(17) . ?
 O9 B4 1.3680(13) . ?
 O10 H10 0.867(18) . ?
 O10 B5 1.3505(14) . ?
 O11 H11 0.860(19) . ?
 O11 B11 1.3640(14) . ?
 O12 H12 0.850(18) . ?
 O12 B11 1.3595(14) . ?
 O13 H13 0.847(19) . ?
 O13 B11 1.3714(14) . ?

loop_
  _geom_angle_atom_site_label_1
  _geom_angle_atom_site_label_2
  _geom_angle_atom_site_label_3
  _geom_angle
  _geom_angle_site_symmetry_1
  _geom_angle_site_symmetry_3
  _geom_angle_publ_flag
 C1 N1 H1 114.9(10) . . ?
 C1 N1 C2 124.98(10) . . ?
 C2 N1 H1 120.0(10) . . ?
 C1 N2 C3 121.38(10) . . ?
 C1 N2 C4 121.84(9) . . ?
 C4 N2 C3 116.76(9) . . ?
 C1 N3 C5 121.88(9) . . ?
 C1 N3 C6 121.65(9) . . ?
 C6 N3 C5 115.65(9) . . ?
 N1 C1 N2 120.13(10) . . ?
 N1 C1 N3 119.83(10) . . ?
 N3 C1 N2 120.02(10) . . ?
 N1 C2 H2A 109.5 . . ?
 N1 C2 H2B 109.5 . . ?
 N1 C2 H2C 109.5 . . ?
 H2A C2 H2B 109.5 . . ?
 H2A C2 H2C 109.5 . . ?
 H2B C2 H2C 109.5 . . ?
 N2 C3 H3A 109.5 . . ?
 N2 C3 H3B 109.5 . . ?
 N2 C3 H3C 109.5 . . ?
 H3A C3 H3B 109.5 . . ?
 H3A C3 H3C 109.5 . . ?
 H3B C3 H3C 109.5 . . ?
 N2 C4 H4A 109.5 . . ?
 N2 C4 H4B 109.5 . . ?
 N2 C4 H4C 109.5 . . ?
 H4A C4 H4B 109.5 . . ?
 H4A C4 H4C 109.5 . . ?
 H4B C4 H4C 109.5 . . ?
 N3 C5 H5A 109.5 . . ?
 N3 C5 H5B 109.5 . . ?
 N3 C5 H5C 109.5 . . ?
 H5A C5 H5B 109.5 . . ?
 H5A C5 H5C 109.5 . . ?
 H5B C5 H5C 109.5 . . ?
 N3 C6 H6A 109.5 . . ?
 N3 C6 H6B 109.5 . . ?
 N3 C6 H6C 109.5 . . ?
 H6A C6 H6B 109.5 . . ?
 H6A C6 H6C 109.5 . . ?
 H6B C6 H6C 109.5 . . ?
 B2 O1 B1 121.45(8) . . ?
 B3 O2 B2 119.02(8) . . ?
 B3 O3 B1 121.36(8) . . ?
 B4 O4 B1 122.75(8) . . ?
 B4 O5 B5 119.50(8) . . ?
 B5 O6 B1 122.90(8) . . ?
 B2 O7 H7 113.3(11) . . ?
 B3 O8 H8 113.1(11) . . ?
 B4 O9 H9 113.7(11) . . ?
 B5 O10 H10 114.8(11) . . ?
 O1 B1 O3 109.59(8) . . ?
 O1 B1 O4 108.51(8) . . ?
 O4 B1 O3 108.02(8) . . ?
 O6 B1 O1 109.57(8) . . ?
 O6 B1 O3 109.53(8) . . ?
 O6 B1 O4 111.58(8) . . ?
 O1 B2 O2 120.61(9) . . ?
 O7 B2 O1 122.78(9) . . ?
 O7 B2 O2 116.59(9) . . ?
 O3 B3 O2 120.85(9) . . ?
 O3 B3 O8 121.94(9) . . ?
 O8 B3 O2 117.20(9) . . ?
 O4 B4 O5 121.42(9) . . ?
 O4 B4 O9 118.41(9) . . ?
 O9 B4 O5 120.16(9) . . ?
 O6 B5 O5 120.76(9) . . ?
 O10 B5 O5 115.63(9) . . ?
 O10 B5 O6 123.60(10) . . ?
 B11 O11 H11 114.1(12) . . ?
 B11 O12 H12 113.9(11) . . ?
 B11 O13 H13 116.0(12) . . ?
 O11 B11 O13 123.54(10) . . ?
 O12 B11 O11 116.83(10) . . ?
 O12 B11 O13 119.62(10) . . ?

loop_
  _geom_hbond_atom_site_label_D
  _geom_hbond_atom_site_label_H
  _geom_hbond_atom_site_label_A
  _geom_hbond_distance_DH
  _geom_hbond_distance_HA
  _geom_hbond_distance_DA
  _geom_hbond_angle_DHA
  _geom_hbond_site_symmetry_A
  _geom_hbond_publ_flag
 N1 H1 O11 0.894(17) 2.162(16) 2.9277(12) 143.2(13) . yes
 O7 H7 O3 0.852(18) 1.862(18) 2.7106(10) 173.5(15) 2_745 yes
 O8 H8 O1 0.857(18) 1.831(18) 2.6873(10) 178.6(16) 2_755 yes
 O9 H9 O8 0.858(17) 1.885(17) 2.7425(10) 177.7(16) 4_576 yes
 O10 H10 O13 0.867(18) 1.861(19) 2.7254(11) 175.2(17) 1_655 yes
 O11 H11 O4 0.860(19) 1.839(19) 2.6958(10) 173.9(17) . yes
 O12 H12 O6 0.850(18) 1.982(18) 2.8276(11) 172.7(16) 1_455 yes
 O13 H13 O9 0.847(19) 1.952(19) 2.7992(10) 177.8(17) . yes

loop_
  _geom_torsion_atom_site_label_1
  _geom_torsion_atom_site_label_2
  _geom_torsion_atom_site_label_3
  _geom_torsion_atom_site_label_4
  _geom_torsion
  _geom_torsion_site_symmetry_1
  _geom_torsion_site_symmetry_2
  _geom_torsion_site_symmetry_3
  _geom_torsion_site_symmetry_4
  _geom_torsion_publ_flag
 C2 N1 C1 N2 28.01(16) . . . . ?
 C2 N1 C1 N3 -150.84(11) . . . . ?
 C3 N2 C1 N1 35.28(15) . . . . ?
 C3 N2 C1 N3 -145.87(11) . . . . ?
 C4 N2 C1 N1 -142.95(11) . . . . ?
 C4 N2 C1 N3 35.90(15) . . . . ?
 C5 N3 C1 N1 -147.90(10) . . . . ?
 C5 N3 C1 N2 33.25(15) . . . . ?
 C6 N3 C1 N1 21.33(15) . . . . ?
 C6 N3 C1 N2 -157.52(10) . . . . ?
 B1 O1 B2 O2 12.54(14) . . . . ?
 B1 O1 B2 O7 -169.14(9) . . . . ?
 B1 O3 B3 O2 -11.22(14) . . . . ?
 B1 O3 B3 O8 169.78(9) . . . . ?
 B1 O4 B4 O5 -4.23(15) . . . . ?
 B1 O4 B4 O9 174.76(8) . . . . ?
 B1 O6 B5 O5 7.12(15) . . . . ?
 B1 O6 B5 O10 -171.59(9) . . . . ?
 B2 O1 B1 O3 -28.44(12) . . . . ?
 B2 O1 B1 O4 89.30(10) . . . . ?
 B2 O1 B1 O6 -148.65(9) . . . . ?
 B2 O2 B3 O3 -7.99(14) . . . . ?
 B2 O2 B3 O8 171.06(9) . . . . ?
 B3 O2 B2 O1 7.39(14) . . . . ?
 B3 O2 B2 O7 -171.03(9) . . . . ?
 B3 O3 B1 O1 27.81(12) . . . . ?
 B3 O3 B1 O4 -90.23(10) . . . . ?
 B3 O3 B1 O6 148.05(8) . . . . ?
 B4 O4 B1 O1 131.47(9) . . . . ?
 B4 O4 B1 O3 -109.79(10) . . . . ?
 B4 O4 B1 O6 10.66(13) . . . . ?
 B4 O5 B5 O6 0.65(15) . . . . ?
 B4 O5 B5 O10 179.46(9) . . . . ?
 B5 O5 B4 O4 -2.04(15) . . . . ?
 B5 O5 B4 O9 178.98(9) . . . . ?
 B5 O6 B1 O1 -132.26(9) . . . . ?
 B5 O6 B1 O3 107.49(10) . . . . ?
 B5 O6 B1 O4 -12.07(13) . . . . ?

_shelx_res_file
;
TITL 2019ncs0283_1b_c.res in P2(1)/c
    2019ncs0283_1b.res
    created by SHELXL-2018/3 at 14:41:10 on 24-May-2019
REM Old TITL 2019NCS0283_1b in P2(1)/c
REM SHELXT solution in P2(1)/c: R1 0.158, Rweak 0.035, Alpha 0.021
REM <I/s> 1.759 for 184 systematic absences, Orientation as input
REM Formula found by SHELXT: C17 B N O9
CELL 1.54178 9.4957 11.449 16.8459 90 98.071 90
ZERR 4 0.0001 0.0001 0.0001 0 0.001 0
LATT 1
SYMM -X,0.5+Y,0.5-Z
SFAC C H B N O
UNIT 24 92 24 12 52
EQIV $1 2-X,0.5+Y,0.5-Z
EQIV $2 +X,1.5-Y,0.5+Z
EQIV $3 1+X,+Y,+Z
EQIV $4 2-X,-0.5+Y,0.5-Z
EQIV $5 -1+X,+Y,+Z

L.S. 10
PLAN  20
SIZE 0.08 0.18 0.22
TEMP -173(2)
HTAB N1 O11
HTAB O7 O3_$4
HTAB O8 O1_$1
HTAB O9 O8_$2
HTAB O10 O13_$3
HTAB O11 O4
HTAB O12 O6_$5
HTAB O13 O9
BOND $H
CONF
MORE -1
fmap 2
acta
REM <olex2.extras>
REM <HklSrc "%.\\2019NCS0283_1b.hkl">
REM </olex2.extras>

WGHT    0.034000    0.741900
FVAR       0.97379
N1    4    0.517678    0.502523    0.131674    11.00000    0.01827    0.02357 =
         0.02077   -0.00345   -0.00284    0.00105
H1    2    0.586518    0.526095    0.170056    11.00000    0.03768
N2    4    0.272873    0.518712    0.098379    11.00000    0.01758    0.02134 =
         0.02224    0.00035    0.00136   -0.00318
N3    4    0.409019    0.681836    0.139509    11.00000    0.01880    0.01998 =
         0.02063   -0.00098    0.00178   -0.00109
C1    1    0.400008    0.567568    0.123666    11.00000    0.01759    0.02094 =
         0.01164    0.00047    0.00148   -0.00115
C2    1    0.536996    0.397316    0.085541    11.00000    0.02398    0.02670 =
         0.02934   -0.00638    0.00165    0.00350
AFIX 137
H2A   2    0.468870    0.397506    0.036120    11.00000   -1.50000
H2B   2    0.521029    0.328239    0.117456    11.00000   -1.50000
H2C   2    0.634066    0.395534    0.072060    11.00000   -1.50000
AFIX   0
C3    1    0.240058    0.399523    0.120948    11.00000    0.02803    0.02355 =
         0.04121   -0.00070    0.00997   -0.00717
AFIX 137
H3A   2    0.244576    0.347122    0.075376    11.00000   -1.50000
H3B   2    0.144242    0.397193    0.136218    11.00000   -1.50000
H3C   2    0.309356    0.374353    0.166381    11.00000   -1.50000
AFIX   0
C4    1    0.162535    0.580486    0.045375    11.00000    0.01535    0.03533 =
         0.02354    0.00102   -0.00113   -0.00107
AFIX 137
H4A   2    0.079800    0.593035    0.073171    11.00000   -1.50000
H4B   2    0.134310    0.533804   -0.003006    11.00000   -1.50000
H4C   2    0.199448    0.656076    0.030390    11.00000   -1.50000
AFIX   0
C5    1    0.295731    0.744933    0.171988    11.00000    0.02694    0.02339 =
         0.02273   -0.00079    0.00576    0.00517
AFIX 137
H5A   2    0.249145    0.798880    0.131368    11.00000   -1.50000
H5B   2    0.336515    0.789108    0.219542    11.00000   -1.50000
H5C   2    0.225703    0.689042    0.186793    11.00000   -1.50000
AFIX   0
C6    1    0.541649    0.746464    0.138656    11.00000    0.02143    0.02293 =
         0.02862   -0.00170   -0.00152   -0.00550
AFIX 137
H6A   2    0.590001    0.755404    0.193660    11.00000   -1.50000
H6B   2    0.520498    0.823744    0.114928    11.00000   -1.50000
H6C   2    0.603320    0.703551    0.106807    11.00000   -1.50000
AFIX   0

O1    5    0.990738    0.495012    0.273925    11.00000    0.01584    0.01284 =
         0.01323   -0.00046   -0.00022    0.00099
O2    5    0.863567    0.600470    0.163988    11.00000    0.01749    0.01364 =
         0.01459    0.00002   -0.00261    0.00042
O3    5    0.998220    0.705446    0.271209    11.00000    0.01650    0.01290 =
         0.01271    0.00065   -0.00002   -0.00093
O4    5    0.897422    0.606209    0.375012    11.00000    0.01164    0.01808 =
         0.01250   -0.00030    0.00063   -0.00024
O5    5    1.060656    0.636961    0.493956    11.00000    0.01299    0.02310 =
         0.01310   -0.00273    0.00033   -0.00051
O6    5    1.152142    0.598677    0.371043    11.00000    0.01207    0.01580 =
         0.01299   -0.00014    0.00050    0.00052
O7    5    0.868875    0.396978    0.159577    11.00000    0.02552    0.01334 =
         0.01773   -0.00067   -0.00529    0.00106
H7    2    0.904569    0.335373    0.182596    11.00000    0.03913
O8    5    0.886414    0.803530    0.154617    11.00000    0.02080    0.01309 =
         0.01431    0.00074   -0.00211   -0.00175
H8    2    0.924439    0.864636    0.177900    11.00000    0.03740
O9    5    0.810763    0.639545    0.496236    11.00000    0.01393    0.02307 =
         0.01210   -0.00236    0.00047    0.00001
H9    2    0.834451    0.659374    0.545425    11.00000    0.04116
O10   5    1.305001    0.634368    0.494135    11.00000    0.01286    0.03039 =
         0.01596   -0.00467    0.00045   -0.00052
H10   2    1.375141    0.622577    0.467261    11.00000    0.04478
B1    3    1.011236    0.600951    0.323501    11.00000    0.01367    0.01259 =
         0.01260    0.00019    0.00096    0.00005
B2    3    0.908304    0.495725    0.200788    11.00000    0.01255    0.01596 =
         0.01425    0.00006    0.00166    0.00024
B3    3    0.916957    0.704190    0.197982    11.00000    0.01179    0.01587 =
         0.01315   -0.00003    0.00265    0.00019
B4    3    0.923860    0.626880    0.454822    11.00000    0.01418    0.01158 =
         0.01443    0.00059    0.00037    0.00010
B5    3    1.174561    0.622026    0.451298    11.00000    0.01491    0.01353 =
         0.01563   -0.00021    0.00089   -0.00006
O11   5    0.637262    0.552277    0.298004    11.00000    0.01317    0.04167 =
         0.01673   -0.00461    0.00073   -0.00226
H11   2    0.717777    0.568808    0.325790    11.00000    0.04885
O12   5    0.393132    0.541733    0.297452    11.00000    0.01289    0.03277 =
         0.01734   -0.00230    0.00126   -0.00117
H12   2    0.324796    0.556800    0.323484    11.00000    0.04136
O13   5    0.535679    0.597572    0.417660    11.00000    0.01225    0.02998 =
         0.01656   -0.00246   -0.00010    0.00099
H13   2    0.619545    0.608456    0.441176    11.00000    0.04618
B11   3    0.523826    0.563817    0.338895    11.00000    0.01578    0.01722 =
         0.01682    0.00167    0.00042    0.00045
HKLF 4


REM  2019ncs0283_1b_c.res in P2(1)/c
REM wR2 = 0.0674, GooF = S = 1.004, Restrained GooF = 1.004 for all data
REM R1 = 0.0263 for 3208 Fo > 4sig(Fo) and 0.0268 for all 3281 data
REM 290 parameters refined using 0 restraints

END

WGHT      0.0308      0.7182

REM Highest difference peak  0.308,  deepest hole -0.168,  1-sigma level  0.032
Q1    1   0.5272  0.6224  0.1328  11.00000  0.05    0.31
Q2    1   0.2829  0.6343  0.1123  11.00000  0.05    0.29
Q3    1   0.3966  0.4533  0.1097  11.00000  0.05    0.26
Q4    1   0.9549  0.6052  0.3558  11.00000  0.05    0.15
Q5    1   0.1126  0.3973  0.1008  11.00000  0.05    0.14
Q6    1   0.8957  0.5549  0.1763  11.00000  0.05    0.13
Q7    1   0.6013  0.3298  0.0612  11.00000  0.05    0.13
Q8    1   0.9361  0.5005  0.2444  11.00000  0.05    0.12
Q9    1   0.4792  0.7111  0.1410  11.00000  0.05    0.12
Q10   1   1.0031  0.6588  0.2943  11.00000  0.05    0.12
Q11   1   0.3470  0.5379  0.0944  11.00000  0.05    0.12
Q12   1   0.5859  0.7280  0.0971  11.00000  0.05    0.12
Q13   1   0.3217  0.3707  0.1489  11.00000  0.05    0.12
Q14   1   0.8780  0.6451  0.1820  11.00000  0.05    0.12
Q15   1   1.1567  0.6000  0.4109  11.00000  0.05    0.12
Q16   1   1.0043  0.6554  0.4695  11.00000  0.05    0.11
Q17   1   0.2643  0.4595  0.1062  11.00000  0.05    0.11
Q18   1   0.9463  0.7512  0.1631  11.00000  0.05    0.11
Q19   1   0.9690  0.7028  0.2326  11.00000  0.05    0.11
Q20   1   1.2480  0.5768  0.4798  11.00000  0.05    0.11
;
_shelx_res_checksum                62586
_shelx_hkl_file
;
   0   0  -1    0.06    0.05
   0   0  -1   -0.01    0.06
   0   0   3    0.59    0.32
   0   0   5    0.76    0.41
   0   0  -5    7.01    0.67
   0   0  -7    0.75    0.57
   0   0   7    1.11    0.60
   0   0  -7    1.39    0.55
   0   0  -8 3141.05   53.18
   0   0  -8 3070.83   53.04
   0   0  -8 3104.60   53.07
   0   0  -8 3131.65   53.09
   0   0   8 3219.49   53.61
   0   0  -8 3070.07   52.95
   0   0  -9    0.21    0.55
   0   0   9    0.62    0.62
   0   0  -9    0.04    0.51
   0   0  -9    0.22    0.61
   0   0   9   -0.46    1.05
   0   0  -9    0.46    0.59
   0   0  -9    1.96    0.82
   0   0  10  374.54    9.75
   0   0  10  386.54   11.48
   0   0 -10  401.26    9.31
   0   0 -10  377.89    9.14
   0   0 -10  412.99    9.46
   0   0 -10  406.89    9.54
   0   0  11    0.11    1.03
   0   0 -11    0.74    0.67
   0   0 -11    1.15    0.73
   0   0 -11    0.91    0.78
   0   0  11    0.29    0.61
   0   0 -11   -0.06    0.66
   0   0  12   12.52    2.12
   0   0 -12   10.52    1.52
   0   0 -12   12.41    1.55
   0   0 -12   10.40    1.43
   0   0 -12   13.55    1.57
   0   0 -13    0.08    0.82
   0   0  13   -0.12    1.28
   0   0 -13    0.14    0.75
   0   0 -13    1.24    0.91
   0   0 -13    0.30    0.72
   0   0 -13    0.52    0.60
   0   0 -14 1705.27   32.44
   0   0 -14 1847.04   33.64
   0   0 -14 1766.77   33.98
   0   0 -14 1787.32   33.69
   0   0 -14 1759.94   34.06
   0   0  14 1833.08   36.78
   0   0 -15    0.37    0.87
   0   0 -15    0.43    0.75
   0   0  15    1.14    1.29
   0   0 -15    0.39    0.83
   0   0 -16  148.13    5.41
   0   0  16  147.98    6.84
   0   0 -16  148.56    5.64
   0   0 -16  138.50    5.66
   0   0 -17    0.84    0.88
   0   0  17    0.32    1.19
   0   0 -17    0.77    0.69
   0   0  17    0.47    0.77
   0   0  18  288.34    8.82
   0   0 -18  271.49    7.53
   0   0  19    1.19    0.81
   0   0 -19    0.26    0.53
   0   0  20   72.45    2.99
   0   1   0    0.28    0.15
   0   1   0    0.67    0.16
   0   1  -1 1104.88   17.91
   0  -1  -1 1065.01   18.00
   0   1   1 1041.00   17.85
   0   1  -2   30.42    1.05
   0   1   2   32.99    1.15
   0  -1   2   32.34    1.09
   0   1  -2   34.21    1.12
   0  -1  -6 1551.51   26.70
   0  -1  -6 1533.76   26.71
   0  -1   6 1544.53   26.99
   0   1   6 1567.59   27.17
   0   1  -6 1517.76   26.96
   0  -1  -7  781.18   15.06
   0   1   7  822.90   15.52
   0   1  -7  796.03   15.23
   0  -1  -7  780.68   15.00
   0  -1  -7  816.55   14.98
   0  -1  -7  804.61   14.93
   0  -1   7  806.46   15.31
   0   1  -8 1965.68   33.55
   0  -1   8 1882.70   35.31
   0  -1  -8 1860.68   33.24
   0   1  -8 1940.34   33.61
   0  -1  -8 1855.90   33.25
   0   1   8 1900.65   33.87
   0  -1  -8 1873.15   33.18
   0   1  -8 1937.08   33.61
   0  -1   8 1899.03   33.68
   0  -1  -8 1873.36   33.41
   0   1  -8 1846.80   33.09
   0   1  -8 1925.68   33.64
   0  -1  -8 1949.24   33.23
   0  -1   9 2901.46   51.68
   0  -1  -9 2729.18   49.35
   0  -1  -9 2807.81   49.31
   0  -1  -9 2920.86   49.01
   0   1   9 2878.34   50.00
   0   1  -9 2949.59   49.61
   0  -1  -9 2915.02   49.23
   0   1  -9 2868.97   49.52
   0   1  -9 2854.39   49.11
   0  -1  -9 2775.63   49.08
   0   1  -9 2813.27   49.56
   0  -1   9 2891.09   49.87
   0   1  -9 2853.49   49.67
   0  -1  -9 2877.04   49.30
   0  -1 -10  786.91   16.20
   0   1  10  814.14   17.10
   0   1 -10  790.32   16.62
   0  -1 -10  845.69   16.15
   0   1 -10  858.05   16.69
   0  -1  10  807.30   16.92
   0  -1  10  803.70   18.38
   0   1 -10  795.15   15.85
   0   1 -10  799.68   16.14
   0   1 -10  839.60   16.67
   0  -1 -10  797.20   16.38
   0  -1 -10  800.82   16.30
   0   1  11   18.06    2.50
   0   1 -11   15.39    1.53
   0  -1 -11   14.42    1.56
   0   1 -11   14.69    1.41
   0   1 -11   21.77    1.91
   0  -1 -11   17.66    1.59
   0  -1 -11   15.15    1.57
   0   1  11   15.23    1.75
   0  -1  11   14.63    1.69
   0   1 -11   22.30    1.95
   0  -1  11   14.51    2.03
   0  -1 -11   15.63    1.60
   0   1 -11   14.74    1.64
   0  -1  12  127.42    6.03
   0  -1 -12  118.05    4.73
   0  -1 -12  120.16    4.51
   0  -1 -12  120.41    4.75
   0   1 -12  120.04    4.37
   0   1 -12  122.55    4.87
   0   1 -12  125.70    5.08
   0   1 -12  125.75    5.01
   0   1  12  123.17    6.54
   0  -1 -12  129.69    4.86
   0   1 -12  122.18    4.66
   0   1 -13  329.36    8.70
   0   1 -13  347.02    9.81
   0  -1  13  354.03   11.10
   0   1 -13  362.18    9.69
   0   1 -13  353.17    9.78
   0  -1 -13  328.87    9.40
   0   1  13  358.64   11.97
   0  -1 -13  352.47    9.00
   0   1 -13  347.77    9.29
   0  -1 -13  337.21    9.34
   0  -1 -13  363.71    9.66
   0  -1 -14   48.10    3.16
   0   1 -14   51.94    3.33
   0  -1 -14   51.30    2.96
   0   1 -14   43.82    3.14
   0  -1 -14   46.16    3.08
   0  -1  14   53.99    4.00
   0  -1 -14   51.69    3.23
   0   1  14   52.91    4.38
   0   1 -14   51.78    3.14
   0   1 -15  506.36   12.77
   0  -1 -15  516.24   12.87
   0   1 -15  516.19   13.22
   0  -1 -15  530.64   12.95
   0  -1 -15  502.03   12.79
   0  -1  15  550.05   14.74
   0   1  15  545.57   15.42
   0  -1 -15  511.33   12.00
   0   1 -15  521.68   12.64
   0   1 -16    2.26    1.04
   0  -1 -16    1.18    0.83
   0   1 -16    3.05    1.09
   0  -1 -16    3.07    1.13
   0   1  16    5.18    1.69
   0   1 -16    1.58    0.93
   0  -1  16    2.16    1.12
   0  -1  16    3.74    1.44
   0  -1 -16    2.47    0.88
   0   1 -17  237.71    7.06
   0  -1  17  224.04    7.92
   0   1 -17  221.66    6.77
   0   1  17  236.97    8.58
   0  -1 -17  218.14    7.01
   0  -1  18  366.48   10.00
   0  -1 -18  354.03    9.10
   0   1  18  362.02   10.44
   0   1 -18  358.59    8.77
   0   1 -18  340.86    8.66
   0  -1  19    8.82    1.29
   0   1  19    8.12    1.41
   0  -1 -19    7.92    1.09
   0   1  20    8.35    1.12
   0   2   2  356.43    7.00
   0  -2   2  385.70    7.16
   0   2  -2  365.64    7.09
   0   2  -2  368.42    7.16
   0  -2  -3 2286.71   38.13
   0   2  -3 2295.10   38.11
   0  -2  -3 2220.61   38.03
   0  -2  -4  508.74    9.58
   0  -2   4  510.34    9.67
   0   2  -4  492.96    9.64
   0   2   4  501.01    9.85
   0  -2  -4  491.84    9.48
   0   2  -5  324.54    7.21
   0  -2  -5  357.21    7.10
   0  -2   5  344.70    7.31
   0   2   5  339.56    7.48
   0  -2  -5  344.32    7.08
   0   2   6 1340.66   24.15
   0   2  -6 1337.88   24.00
   0  -2  -6 1332.87   23.50
   0  -2   6 1354.19   23.94
   0  -2  -6 1327.66   23.54
   0  -2  -7  747.20   14.45
   0   2   7  758.80   15.06
   0  -2  -7  768.42   14.32
   0  -2  -7  771.18   14.35
   0  -2   7  767.43   14.83
   0   2  -7  762.37   14.86
   0   2  -7  718.88   14.75
   0  -2  -7  744.82   14.41
   0  -2  -8  313.79    7.17
   0   2  -8  303.05    7.65
   0   2   8  315.49    7.90
   0  -2   8  298.50    7.60
   0   2  -8  306.74    7.09
   0  -2  -8  311.94    7.38
   0   2  -8  309.18    7.73
   0  -2   8  307.27    8.27
   0  -2  -8  317.62    7.21
   0  -2  -8  312.67    7.36
   0   2  -8  310.60    7.17
   0  -2  -9  517.15   11.22
   0  -2   9  497.60   11.46
   0  -2  -9  513.98   11.15
   0   2  -9  508.08   10.80
   0   2   9  524.37   11.82
   0  -2   9  518.44   12.31
   0  -2  -9  533.46   10.91
   0  -2  -9  511.23   10.95
   0   2  -9  504.03   11.34
   0   2  -9  513.56   10.87
   0   2  -9  505.55   11.47
   0  -2  -9  489.77   10.34
   0  -2  -9  501.20   10.82
   0  -2 -10 1258.41   23.19
   0  -2 -10 1279.83   24.22
   0   2 -10 1331.38   24.63
   0   2 -10 1318.19   24.55
   0  -2 -10 1259.17   23.90
   0   2  10 1267.00   24.96
   0  -2 -10 1306.51   23.84
   0   2 -10 1223.82   23.63
   0  -2  10 1254.32   24.67
   0   2 -10 1281.30   24.60
   0   2 -10 1231.18   23.60
   0  -2 -10 1256.30   24.08
   0  -2  10 1287.69   25.67
   0  -2 -11 1426.13   26.95
   0  -2  11 1430.84   28.60
   0   2 -11 1367.13   26.27
   0   2 -11 1392.35   26.45
   0  -2 -11 1388.11   26.73
   0   2 -11 1456.09   27.49
   0   2 -11 1415.36   27.22
   0   2 -11 1439.59   27.50
   0  -2 -11 1440.10   25.98
   0  -2 -11 1430.26   26.63
   0  -2  12  891.57   19.81
   0  -2 -12  864.86   17.16
   0  -2 -12  879.16   18.06
   0  -2 -12  876.10   18.31
   0   2  12  863.68   21.90
   0   2 -12  852.70   17.79
   0   2 -12  884.03   18.81
   0   2 -12  838.81   17.54
   0   2 -12  887.70   18.56
   0  -2 -12  849.34   17.84
   0  -2 -13  244.38    7.41
   0  -2 -13  249.44    7.70
   0   2 -13  249.82    8.04
   0  -2  13  276.38    8.99
   0  -2 -13  253.69    7.59
   0   2 -13  252.42    7.91
   0   2 -13  238.56    7.02
   0  -2 -13  241.48    6.69
   0   2 -13  251.32    7.40
   0  -2 -14    9.77    1.24
   0  -2  14   10.35    1.83
   0   2 -14    9.92    1.45
   0  -2 -14    7.46    1.45
   0   2  14    9.63    2.35
   0  -2 -14   10.99    1.63
   0   2 -14   13.49    1.88
   0  -2 -14    9.81    1.48
   0   2 -14   13.51    1.88
   0  -2 -15  116.06    4.92
   0   2 -15  113.98    4.74
   0   2  15  122.51    6.69
   0   2 -15  113.80    5.32
   0  -2 -15  114.68    4.89
   0  -2  15  125.50    5.92
   0   2 -15  117.59    5.20
   0  -2  15  107.49    5.78
   0  -2 -15  118.70    5.16
   0  -2  16    2.19    1.18
   0   2 -16    1.77    0.88
   0   2 -16    2.99    1.16
   0   2 -16    3.33    1.08
   0   2  16    1.70    1.43
   0  -2  16    1.98    1.17
   0  -2 -16    2.18    0.93
   0  -2 -16    1.25    0.77
   0  -2 -16    1.44    1.00
   0   2 -17  306.65    8.35
   0   2 -17  357.08    9.29
   0  -2  17  330.15    9.68
   0  -2 -17  347.91    9.27
   0  -2  17  309.10    9.37
   0   2  17  325.88   10.63
   0  -2  18    9.00    1.42
   0  -2 -18   10.66    1.43
   0   2 -18    9.12    1.32
   0  -2  18    7.43    1.20
   0   2  18   10.39    1.75
   0   2 -19   76.35    2.98
   0  -2  19   77.01    3.27
   0  -2 -19   82.41    3.29
   0   2  19   86.10    3.98
   0   3   0    0.64    0.43
   0   3   0    1.90    0.49
   0  -3  -4 2046.12   35.16
   0   3  -4 2056.61   35.35
   0  -3  -4 2052.26   35.10
   0  -3  -4 2060.12   35.28
   0  -3   4 2079.04   35.36
   0   3  -4 2013.58   35.45
   0  -3  -5    9.67    0.94
   0   3  -5   10.90    1.09
   0  -3   5    9.66    1.00
   0  -3  -5   10.30    0.97
   0   3  -6  257.25    6.35
   0  -3   6  253.70    6.33
   0  -3  -6  252.86    6.00
   0  -3  -6  244.65    5.95
   0  -3  -6  251.59    5.92
   0   3  -6  251.17    6.39
   0  -3  -6  243.82    5.83
   0   3  -6  251.76    6.22
   0  -3   7 4437.29   74.65
   0  -3  -7 4452.14   73.94
   0   3  -7 4349.57   74.76
   0  -3  -7 4362.92   74.02
   0  -3  -7 4359.50   73.97
   0  -3  -7 4503.34   74.20
   0   3  -7 4402.79   74.49
   0   3  -7 4466.95   74.23
   0  -3   7 4378.27   74.74
   0  -3  -8  421.06    8.97
   0  -3   8  431.31   10.17
   0   3  -8  439.87    9.60
   0   3  -8  407.39    9.08
   0  -3  -8  433.32    9.33
   0  -3  -8  431.53    9.58
   0  -3   8  429.17   10.01
   0   3  -8  429.23    9.08
   0  -3  -8  430.97    9.52
   0   3   8  426.34   10.25
   0   3  -8  422.18    9.05
   0   3  -8  426.77    9.81
   0  -3  -8  413.12    9.27
   0   3  -9 1297.25   23.70
   0  -3   9 1339.85   25.61
   0  -3   9 1308.74   25.27
   0   3  -9 1344.96   24.65
   0  -3  -9 1325.35   24.72
   0   3  -9 1300.54   25.08
   0   3  -9 1289.43   24.20
   0   3   9 1330.86   25.68
   0  -3  -9 1311.12   24.35
   0  -3  -9 1360.54   24.41
   0   3  -9 1308.67   23.74
   0  -3  -9 1365.69   24.84
   0   3 -10   25.02    1.81
   0  -3 -10   25.67    1.99
   0  -3 -10   23.79    1.78
   0   3 -10   23.89    1.84
   0  -3  10   26.48    2.27
   0  -3 -10   23.04    1.94
   0  -3 -10   23.18    1.80
   0  -3 -11  167.15    5.55
   0   3 -11  169.11    5.44
   0  -3 -11  179.16    5.58
   0   3 -11  178.19    6.23
   0  -3  11  173.44    6.41
   0  -3 -11  175.95    5.93
   0   3 -11  168.10    5.58
   0  -3 -11  172.54    5.93
   0   3 -12   75.55    3.53
   0  -3  12   76.45    4.19
   0   3 -12   75.68    4.12
   0  -3 -12   81.09    3.71
   0  -3 -12   77.36    3.86
   0   3 -12   70.07    3.45
   0  -3 -12   76.26    3.58
   0  -3 -13  184.04    6.57
   0   3 -13  180.50    6.87
   0   3  13  186.52    8.84
   0  -3  13  171.62    7.54
   0   3 -13  177.91    5.97
   0  -3 -13  186.68    6.21
   0   3 -13  185.41    6.82
   0   3 -13  177.38    5.97
   0  -3  13  189.43    7.06
   0  -3 -13  182.83    6.10
   0  -3 -14  151.11    5.58
   0  -3 -14  141.42    5.40
   0  -3  14  150.37    6.24
   0   3 -14  144.32    5.31
   0   3  14  151.80    7.85
   0  -3  14  141.87    6.81
   0  -3 -14  153.76    5.98
   0   3 -14  151.33    6.07
   0   3 -14  148.87    6.22
   0  -3 -15  140.03    5.29
   0  -3 -15  140.81    5.73
   0  -3  15  129.95    6.35
   0   3 -15  142.76    5.87
   0  -3 -15  136.41    5.25
   0   3 -15  130.65    4.99
   0   3 -15  134.18    5.91
   0  -3  15  132.29    5.82
   0   3  15  149.53    7.49
   0   3  16  999.76   22.97
   0   3 -16  954.60   20.18
   0  -3  16  934.84   20.31
   0  -3  16  911.65   21.00
   0  -3 -16  907.87   19.10
   0  -3 -16  971.49   20.19
   0   3 -16  905.05   20.44
   0   3  17  530.70   14.26
   0  -3  17  490.47   12.66
   0  -3 -17  521.17   12.42
   0   3 -17  538.00   12.58
   0  -3  17  492.99   12.30
   0   3  18    1.86    1.11
   0   3 -18    2.08    0.96
   0  -3 -18    1.33    0.85
   0  -3  18    0.58    0.60
   0  -3  18    0.78    0.67
   0  -3 -19   71.91    2.99
   0   3  19   66.69    3.40
   0   3 -19   64.80    2.77
   0   4   1 4135.57   69.00
   0   4  -3 1778.39   30.60
   0  -4  -3 1722.65   30.35
   0  -4   3 1783.20   30.64
   0  -4  -3 1718.69   30.82
   0   4   3 1736.18   30.39
   0   4  -3 1696.19   30.68
   0  -4  -4   76.16    2.84
   0   4  -4   76.69    3.04
   0  -4  -4   72.05    2.72
   0  -4  -4   73.99    2.91
   0  -4   4   76.85    2.93
   0  -4   4   73.46    3.27
   0   4  -4   76.63    2.97
   0   4  -5 1639.72   29.01
   0   4  -5 1666.44   28.92
   0  -4  -5 1616.93   28.44
   0  -4  -5 1538.71   28.09
   0  -4  -5 1611.67   28.80
   0  -4   5 1577.53   28.92
   0  -4  -5 1605.04   28.59
   0   4  -5 1640.45   28.62
   0   4  -5 1645.93   29.14
   0  -4   5 1504.15   29.87
   0   4  -5 1668.08   28.91
   0   4  -6 3238.62   54.64
   0   4  -6 3080.19   54.57
   0   4  -6 3332.86   55.12
   0   4  -6 3174.51   54.64
   0  -4  -6 3121.21   54.39
   0  -4  -6 3112.10   54.05
   0  -4   6 3274.02   55.00
   0  -4  -6 3286.65   54.36
   0  -4   6 3041.26   56.11
   0  -4  -6 3187.93   54.51
   0   4  -6 3249.10   55.01
   0  -4   7  428.77   10.01
   0   4  -7  423.48    9.11
   0  -4  -7  414.72    9.30
   0   4  -7  442.45   10.15
   0   4  -7  440.79    9.88
   0   4  -7  423.48    9.85
   0   4  -7  435.31    9.55
   0  -4  -7  425.17    9.39
   0  -4  -7  412.96    9.51
   0  -4   7  419.02    9.58
   0  -4  -7  412.73    8.98
   0  -4  -7  426.30    9.50
   0   4  -7  453.06    9.68
   0   4  -8  960.50   18.32
   0  -4   8  930.98   18.71
   0  -4  -8  978.53   18.28
   0  -4  -8  925.35   17.77
   0  -4   8  911.58   19.06
   0  -4  -8  926.71   18.46
   0  -4  -8  964.13   18.44
   0  -4  -8  936.38   18.26
   0   4  -8  947.45   18.88
   0   4  -8  937.88   17.97
   0   4  -8  954.47   18.32
   0   4  -8  992.36   19.33
   0   4  -8  956.83   18.87
   0   4  -9  282.31    7.12
   0  -4   9  269.88    8.99
   0  -4  -9  286.35    7.24
   0   4  -9  279.03    7.10
   0  -4  -9  272.48    7.41
   0  -4  -9  295.06    7.70
   0   4  -9  282.53    7.13
   0  -4   9  281.97    7.80
   0  -4  -9  272.98    7.41
   0   4  -9  289.47    7.75
   0  -4  -9  273.58    6.83
   0   4  -9  289.70    7.92
   0  -4 -10   29.69    2.29
   0  -4  10   29.63    2.89
   0   4 -10   29.61    1.86
   0   4 -10   27.18    2.31
   0   4 -10   33.32    2.34
   0   4 -10   28.77    1.84
   0  -4  10   32.10    2.39
   0  -4 -10   28.13    2.05
   0  -4 -10   28.98    2.19
   0  -4 -10   29.91    2.01
   0   4 -10   31.01    2.05
   0   4 -11    7.47    1.48
   0  -4 -11    5.95    1.10
   0  -4 -11    4.60    1.17
   0  -4  11    4.47    1.10
   0  -4 -11    4.69    0.94
   0   4 -11    4.77    0.97
   0   4 -11    7.62    1.26
   0  -4  11    5.36    1.56
   0   4 -12 1273.56   25.50
   0   4 -12 1191.84   24.46
   0  -4  12 1234.07   27.20
   0  -4  12 1222.63   25.12
   0   4 -12 1187.69   23.84
   0   4 -12 1265.18   25.83
   0  -4 -12 1251.63   24.30
   0  -4 -12 1241.79   24.08
   0  -4 -12 1331.27   25.37
   0   4 -13   53.09    3.66
   0  -4 -13   51.31    2.97
   0  -4  13   51.96    3.39
   0  -4  13   52.57    4.11
   0   4 -13   52.59    2.94
   0  -4 -13   53.47    3.07
   0  -4 -13   56.95    3.51
   0   4 -13   48.62    3.03
   0  -4  14   17.09    2.41
   0  -4  14   13.50    1.83
   0   4 -14   10.99    1.83
   0  -4 -14   11.94    1.56
   0  -4 -14   15.31    1.99
   0  -4 -14   14.67    1.64
   0  -4 -15  100.54    4.79
   0   4 -15   92.34    4.88
   0  -4 -15   99.69    4.22
   0  -4  15   96.28    4.55
   0  -4  15   96.02    5.26
   0  -4  16  525.41   12.59
   0  -4 -16  568.12   13.27
   0   4 -16  542.14   13.33
   0  -4  16  563.51   14.11
   0  -4 -16  501.82   11.82
   0   4  17   32.10    3.00
   0   4 -17   34.48    2.57
   0  -4  17   28.74    2.45
   0  -4 -17   33.13    2.44
   0  -4 -18  459.59   10.55
   0   4 -18  458.75   10.55
   0   4  18  459.59   11.72
   0   4  19   11.91    1.40
   0   4 -19   12.21    1.18
   0  -4 -19   13.00    1.23
   0   5   0    1.30    0.70
   0  -5   0    0.37    0.56
   0   5   0    0.27    0.60
   0   5   0    0.43    0.62
   0   5   0    0.60    0.59
   0   5   1 2390.07   41.26
   0   5  -1 2441.96   41.42
   0   5  -1 2370.35   41.66
   0   5  -1 2400.26   41.43
   0  -5  -1 2369.05   41.38
   0   5  -1 2387.34   41.43
   0  -5   1 2378.73   41.43
   0   5   1 2348.31   41.51
   0  -5   2  532.64   11.71
   0   5  -2  545.02   11.64
   0  -5  -2  543.03   11.41
   0   5  -2  528.60   11.56
   0   5  -2  543.91   11.53
   0   5   2  548.90   11.39
   0  -5  -2  561.49   12.23
   0   5   3  819.93   16.09
   0   5  -3  824.66   16.37
   0   5  -3  808.05   16.31
   0  -5  -3  821.42   16.03
   0   5  -3  865.38   16.40
   0  -5   3  847.99   16.79
   0   5   3  820.08   16.10
   0  -5   3  832.59   16.34
   0   5  -3  808.82   16.49
   0  -5  -3  846.83   16.76
   0   5  -4 2764.54   46.53
   0  -5  -4 2662.37   46.58
   0  -5  -4 2561.41   45.22
   0   5  -4 2594.20   45.56
   0  -5  -4 2658.22   45.34
   0  -5   4 2763.66   46.52
   0  -5  -4 2647.11   46.01
   0   5  -4 2669.82   46.73
   0  -5   4 2748.65   47.16
   0  -5  -5  874.21   16.68
   0  -5  -5  892.37   17.76
   0  -5   5  912.04   18.65
   0  -5   5  889.33   17.79
   0   5  -5  904.03   17.73
   0   5  -5  862.10   17.17
   0   5  -5  914.55   17.78
   0  -5  -5  895.98   17.45
   0  -5  -5  932.18   17.26
   0  -5  -5  880.78   16.79
   0   5  -5  910.25   17.91
   0  -5  -5  894.03   17.39
   0  -5  -6  324.99    7.76
   0  -5   6  332.24    9.07
   0   5  -6  327.31    8.07
   0   5  -6  310.84    7.80
   0  -5  -6  303.08    7.36
   0   5  -6  314.94    8.32
   0  -5  -6  324.11    7.81
   0  -5  -6  305.91    7.88
   0  -5   6  319.58    8.26
   0  -5  -6  291.81    7.70
   0   5  -6  338.37    8.17
   0  -5  -6  304.61    7.19
   0  -5  -7  612.41   13.28
   0  -5  -7  640.64   13.21
   0  -5   7  613.36   13.90
   0  -5  -7  657.51   13.41
   0  -5  -7  623.23   12.98
   0   5  -7  620.28   13.44
   0   5  -7  643.39   14.12
   0  -5   7  621.22   12.96
   0  -5  -7  619.06   12.66
   0   5  -7  630.82   13.46
   0  -5   7  624.41   14.95
   0   5  -7  632.86   13.48
   0   5  -8  765.36   16.35
   0   5  -8  738.15   15.37
   0   5  -8  742.41   15.70
   0  -5  -8  745.36   15.22
   0  -5  -8  737.45   14.61
   0   5  -8  736.91   15.38
   0   5  -8  726.00   15.89
   0  -5  -8  694.32   15.19
   0  -5   8  729.85   15.17
   0  -5  -8  755.80   15.15
   0  -5  -9  723.07   14.82
   0  -5  -9  727.99   15.17
   0   5  -9  718.11   15.00
   0   5  -9  720.25   14.97
   0  -5  -9  691.52   14.24
   0   5  -9  723.58   16.21
   0  -5   9  698.37   15.06
   0   5  -9  675.54   15.51
   0   5  -9  750.64   15.80
   0  -5  -9  671.87   14.95
   0  -5 -10  272.58    7.77
   0  -5  10  261.09    7.60
   0   5 -10  262.79    7.19
   0  -5 -10  273.58    7.34
   0   5 -10  251.13    7.81
   0   5 -10  269.54    7.23
   0   5 -10  257.48    7.98
   0   5 -11  470.63   12.34
   0  -5 -11  490.55   11.36
   0  -5 -11  494.02   12.05
   0   5 -11  467.97   10.80
   0  -5  11  482.86   13.81
   0  -5 -11  492.22   12.22
   0  -5  11  473.55   11.64
   0   5 -11  469.07   10.79
   0  -5 -11  494.98   11.32
   0  -5 -12   42.41    2.66
   0  -5 -12   41.84    3.06
   0  -5 -12   41.70    2.60
   0  -5  12   42.09    2.80
   0  -5  12   36.30    3.42
   0   5 -12   46.82    3.33
   0  -5 -13 1359.78   27.12
   0  -5 -13 1452.43   27.38
   0  -5 -13 1536.56   28.87
   0   5 -13 1495.75   29.06
   0  -5  13 1461.75   30.72
   0  -5  13 1353.15   27.68
   0   5 -13 1447.67   29.49
   0   5  13 1376.01   32.39
   0  -5  14   53.58    3.13
   0  -5 -14   51.17    2.97
   0   5 -14   56.93    3.66
   0  -5  14   58.15    4.15
   0  -5 -14   56.85    3.64
   0   5 -14   51.21    3.65
   0   5  14   54.90    4.81
   0  -5  15 2687.20   49.37
   0   5  15 2497.24   50.98
   0   5 -15 2777.35   48.33
   0   5 -15 2594.42   48.68
   0  -5 -15 2469.93   45.98
   0  -5 -15 2775.08   48.13
   0  -5  16  170.52    6.60
   0  -5 -16  177.94    6.25
   0  -5 -17    0.57    0.80
   0  -5  17    0.81    0.77
   0  -5 -18  247.95    6.51
   0   5 -18  244.79    6.45
   0   6   0 1791.52   32.12
   0   6   0 1820.54   32.30
   0   6   0 1807.48   32.14
   0  -6   0 1741.44   32.31
   0  -6   0 1788.46   32.00
   0   6   0 1766.55   32.60
   0   6   1 1453.80   26.47
   0  -6   1 1437.39   26.68
   0  -6   1 1465.88   26.52
   0   6  -1 1432.11   26.49
   0  -6  -1 1405.94   26.02
   0   6   1 1439.15   26.15
   0   6  -1 1435.80   26.51
   0   6   1 1387.91   26.46
   0   6  -1 1428.74   26.52
   0   6   1 1444.00   26.17
   0  -6  -1 1428.38   26.56
   0   6   2   44.52    2.18
   0   6   2   26.04    1.89
   0  -6  -2   30.05    2.34
   0  -6  -2   27.86    1.95
   0  -6   2   26.46    1.98
   0  -6  -2   25.87    1.48
   0  -6  -2   27.16    1.73
   0   6  -2   29.07    2.06
   0   6  -2   28.80    2.05
   0   6  -2   30.23    2.08
   0   6   2   41.73    2.12
   0   6   2   25.78    1.90
   0   6   3 1921.82   33.93
   0   6   3 1877.36   33.02
   0   6  -3 1972.88   34.12
   0   6   3 1854.66   33.85
   0  -6  -3 1802.63   32.52
   0  -6   3 1890.76   34.39
   0  -6  -3 1844.74   33.03
   0   6  -3 1999.69   34.15
   0  -6  -3 1839.54   34.69
   0   6  -3 1928.43   34.23
   0  -6  -3 1881.01   33.81
   0   6  -3 1821.91   32.72
   0   6   3 1841.06   32.95
   0   6   4 5146.37   85.97
   0  -6   4 5142.97   87.60
   0  -6  -4 5115.09   85.99
   0  -6   4 5249.73   88.26
   0   6   4 5117.40   85.96
   0  -6  -4 5101.15   87.08
   0  -6  -4 5100.77   86.24
   0   6  -4 5120.91   86.33
   0   6  -4 5415.55   87.80
   0  -6  -5   13.01    1.32
   0   6  -5   11.56    1.46
   0  -6  -5   10.64    1.29
   0  -6   5   11.91    1.62
   0  -6  -5    9.99    1.11
   0   6  -5   12.57    1.51
   0  -6  -5   11.90    1.43
   0  -6   5   10.89    1.39
   0  -6  -5   11.78    1.16
   0   6  -5   11.63    1.32
   0   6  -5   11.19    1.52
   0   6  -6  110.61    4.42
   0   6  -6   94.84    3.90
   0  -6  -6  107.18    3.79
   0  -6  -6  111.67    4.21
   0  -6  -6  109.58    4.07
   0  -6  -6  111.44    3.76
   0   6  -6  111.21    4.42
   0  -6  -6   99.06    4.04
   0   6  -6  107.10    4.54
   0  -6   6  105.82    4.84
   0   6  -7  263.89    7.96
   0  -6  -7  258.71    6.68
   0  -6  -7  242.67    7.14
   0  -6  -7  256.31    6.89
   0   6  -7  254.53    7.30
   0  -6   7  268.05    8.53
   0   6  -7  271.56    7.59
   0  -6  -7  250.12    7.06
   0  -6  -7  260.85    7.22
   0   6  -7  263.03    7.52
   0  -6  -8  645.27   14.09
   0   6  -8  644.57   14.51
   0  -6  -8  644.88   13.54
   0  -6  -8  692.52   14.62
   0  -6  -8  652.41   14.12
   0  -6   8  663.14   16.21
   0   6  -8  657.55   15.43
   0   6  -8  664.17   14.62
   0   6  -8  675.49   14.77
   0   6  -9 1358.91   27.38
   0  -6  -9 1403.70   26.55
   0   6  -9 1391.51   28.28
   0   6  -9 1390.58   26.89
   0   6  -9 1387.34   26.88
   0  -6  -9 1452.40   27.34
   0  -6  -9 1446.51   26.95
   0   6 -10  764.97   16.06
   0  -6 -10  720.94   15.66
   0   6 -10  732.54   15.91
   0   6 -10  743.52   17.50
   0   6 -10  743.18   16.84
   0  -6 -10  777.14   16.46
   0  -6 -11  197.15    6.71
   0   6 -11  186.72    6.01
   0   6 -11  203.72    7.09
   0   6 -11  192.24    6.08
   0  -6 -11  191.92    6.09
   0   6 -12   13.97    2.05
   0   6 -12   12.84    1.39
   0  -6 -12   11.48    1.45
   0  -6 -12   11.20    1.41
   0  -6  12   12.48    2.24
   0  -6  13   76.51    4.83
   0   6 -13   68.63    4.13
   0   6  13   69.20    5.36
   0  -6 -13   73.78    4.14
   0  -6 -13   73.31    3.47
   0  -6  14  325.18   10.55
   0   6 -14  334.65    9.81
   0   6 -14  319.55   10.15
   0  -6 -14  340.37    9.64
   0   6  14  332.65   11.89
   0  -6  15   19.89    2.34
   0  -6 -15   18.91    2.09
   0   6  15   17.23    2.56
   0   6 -15   21.84    2.26
   0  -6  16    5.61    1.27
   0   6  16    5.36    1.48
   0  -6 -16    6.49    1.34
   0   6 -16    6.70    1.34
   0  -6 -17    2.23    0.86
   0   6  17    2.76    1.05
   0  -6  17    2.95    0.82
   0   6 -17    2.34    0.94
   0   6  18    2.18    0.78
   0  -6 -18    2.78    0.71
   0  -7   0    0.26    0.59
   0   7   0    1.89    0.86
   0   7   0    7.58    1.19
   0  -7   0    0.38    0.64
   0   7   0    5.71    1.07
   0  -7   1 1091.14   22.20
   0  -7   1 1127.66   21.87
   0   7   1 1111.48   21.59
   0  -7  -1 1103.27   21.37
   0   7   1 1110.33   22.14
   0  -7  -1 1058.99   22.01
   0   7  -1 1152.48   22.26
   0   7   1 1136.71   22.09
   0   7   1 1104.99   21.53
   0   7  -1 1160.97   21.99
   0   7  -1 1142.44   21.92
   0   7  -2 4420.72   74.28
   0   7   2 4451.09   74.36
   0   7   2 4310.48   73.42
   0  -7   2 4334.41   74.33
   0  -7   2 4129.18   74.43
   0   7   2 4199.58   74.17
   0  -7  -2 4319.13   73.32
   0   7  -2 4406.57   74.24
   0   7   2 4328.85   73.48
   0   7  -2 4470.49   74.56
   0  -7  -2 4172.22   74.20
   0   7   3 4641.00   80.80
   0   7  -3 4898.92   80.98
   0   7   3 4768.33   80.93
   0   7   3 4640.22   79.78
   0  -7   3 4866.24   81.27
   0  -7  -3 4627.24   79.77
   0  -7  -3 4526.01   80.74
   0   7   3 4737.42   79.81
   0   7  -3 4866.39   80.97
   0   7  -3 4963.51   81.36
   0  -7  -3 4600.18   79.01
   0  -7  -4 1572.93   28.87
   0   7   4 1605.87   29.15
   0   7  -4 1602.89   29.22
   0   7  -4 1660.75   31.01
   0  -7  -4 1580.59   29.35
   0   7   4 1610.62   29.11
   0  -7  -4 1702.84   29.69
   0  -7  -4 1581.54   30.35
   0   7  -4 1620.12   30.51
   0   7  -4 1649.75   30.58
   0  -7   4 1620.18   31.13
   0  -7  -5  949.87   18.61
   0  -7  -5 1018.72   19.42
   0   7  -5 1011.95   20.66
   0   7  -5  942.98   19.00
   0  -7  -5  965.20   19.87
   0  -7  -5  956.96   18.83
   0  -7   5  983.26   20.85
   0   7  -6 2333.02   43.09
   0   7  -6 2340.69   42.50
   0  -7  -6 2448.33   41.84
   0   7  -6 2265.37   41.48
   0  -7  -6 2286.01   40.96
   0  -7   6 2393.44   43.62
   0   7  -6 2354.20   42.50
   0  -7  -6 2246.56   40.90
   0  -7  -6 2306.68   41.90
   0  -7  -7  598.73   13.26
   0   7  -7  547.63   13.08
   0  -7  -7  568.49   13.02
   0  -7   7  600.09   14.86
   0  -7  -7  567.99   12.61
   0  -7  -7  583.24   12.43
   0   7  -7  574.65   13.61
   0   7  -7  582.02   14.35
   0   7  -7  567.58   13.59
   0   7  -8   65.58    3.56
   0  -7  -8   67.54    3.36
   0  -7  -8   70.48    3.38
   0  -7  -8   66.24    3.04
   0   7  -8   67.97    4.06
   0   7  -8   67.97    3.64
   0  -7   8   68.05    4.31
   0  -7  -8   70.82    3.59
   0   7  -8   62.54    3.53
   0  -7  -9  187.20    6.08
   0   7  -9  191.69    6.55
   0  -7   9  197.07    7.79
   0   7  -9  202.64    6.83
   0   7  -9  190.85    6.52
   0   7  -9  194.17    7.39
   0  -7  -9  196.00    6.68
   0  -7  -9  197.57    6.35
   0   7 -10  186.70    6.85
   0  -7 -10  188.99    6.11
   0   7 -10  200.33    6.58
   0   7 -10  195.09    6.52
   0   7 -10  206.34    7.72
   0  -7  10  189.16    7.87
   0  -7 -10  205.33    6.76
   0  -7 -10  215.38    7.09
   0   7 -11   63.05    4.19
   0   7 -11   66.49    3.91
   0  -7 -11   60.17    3.10
   0  -7 -11   68.88    3.73
   0   7 -11   65.16    3.39
   0   7 -11   64.30    3.37
   0  -7 -11   71.67    3.92
   0  -7 -12   54.44    2.90
   0   7 -12   60.86    3.03
   0   7 -12   65.62    3.86
   0   7 -12   57.82    2.99
   0  -7  13   13.58    2.13
   0   7 -13   14.65    1.99
   0   7  13   12.33    2.35
   0   7 -14    3.28    1.21
   0   7  14    2.86    1.53
   0  -7  14    4.10    1.37
   0   7  15   90.32    4.93
   0  -7  15   87.62    4.38
   0   7 -15   96.58    4.29
   0   7  16    2.26    0.98
   0  -7 -16    3.65    0.95
   0   7 -16    2.66    0.99
   0  -7  16    3.91    1.02
   0   7  17  537.40   11.96
   0   7 -17  551.95   11.60
   0  -7 -17  561.28   11.58
   0   8   0 2546.63   45.32
   0   8   0 2523.55   45.31
   0  -8   0 2496.31   45.07
   0   8   0 2490.77   45.97
   0   8   0 2571.14   45.95
   0   8  -1  300.31    8.47
   0  -8   1  289.69    8.33
   0   8  -1  315.47    8.91
   0   8   1  306.75    8.27
   0   8   1  301.24    8.24
   0   8   1  296.71    8.73
   0   8   1  315.09    8.84
   0  -8  -1  288.09    7.99
   0   8  -1  298.86    8.44
   0   8  -2 1634.67   31.00
   0  -8   2 1622.22   30.60
   0   8  -2 1587.93   30.46
   0   8  -2 1586.37   30.43
   0   8   2 1596.56   29.79
   0   8   2 1582.97   30.77
   0  -8  -2 1537.80   29.57
   0   8   2 1634.96   30.80
   0   8   2 1589.71   29.76
   0  -8   3    0.77    0.94
   0   8   3    0.85    0.88
   0  -8  -3    0.43    0.62
   0   8  -3   -0.25    0.83
   0   8   3    1.31    0.76
   0   8   3    1.09    0.73
   0   8   3    1.17    0.82
   0   8  -3    2.89    1.09
   0   8  -3    2.64    1.06
   0  -8  -3    0.63    0.67
   0  -8   4  208.87    7.13
   0  -8  -4  205.08    6.13
   0  -8  -4  195.85    5.99
   0  -8  -4  193.58    6.73
   0   8  -4  202.59    6.82
   0   8  -4  209.37    6.94
   0   8   4  198.26    5.85
   0   8  -4  204.22    7.17
   0  -8  -4  187.67    5.45
   0  -8  -5    2.54    0.77
   0  -8  -5    0.93    0.72
   0   8  -5    0.82    0.94
   0  -8  -5    1.44    0.89
   0   8  -5    0.56    0.62
   0  -8   5    1.25    1.04
   0  -8  -5    1.74    0.71
   0   8  -6  148.87    5.26
   0  -8   6  149.97    6.33
   0  -8  -6  146.38    4.97
   0  -8  -6  148.67    5.54
   0  -8  -6  145.04    4.88
   0  -8  -6  148.89    5.34
   0   8  -6  146.83    6.17
   0  -8   7   33.81    3.03
   0  -8  -7   33.35    2.19
   0   8  -7   31.90    2.92
   0  -8  -7   35.92    2.57
   0   8  -7   32.57    2.44
   0   8  -7   37.05    2.84
   0  -8  -7   33.32    2.26
   0   8  -7   33.56    2.73
   0  -8  -7   33.66    2.47
   0   8  -8  448.94   11.63
   0   8  -8  429.72   11.18
   0  -8  -8  439.00   10.72
   0  -8  -8  466.21   11.43
   0   8  -8  446.17   11.67
   0  -8   8  459.27   12.91
   0   8  -8  442.38   12.54
   0  -8  -8  433.39   10.84
   0   8  -9   31.60    2.56
   0   8  -9   29.91    2.90
   0  -8   9   31.18    3.10
   0   8  -9   34.03    2.69
   0   8  -9   29.19    2.47
   0  -8  -9   33.57    2.33
   0  -8  -9   30.60    2.37
   0  -8  -9   33.57    2.61
   0   8 -10  121.81    5.01
   0  -8 -10  118.61    4.86
   0   8 -10  115.51    5.77
   0  -8  10  116.18    5.87
   0   8 -10  122.71    5.25
   0   8 -10  122.02    5.03
   0  -8 -10  124.58    5.23
   0   8 -11   71.35    4.44
   0   8 -11   78.26    4.09
   0  -8  11   76.09    4.62
   0  -8 -11   81.87    4.15
   0   8 -11   71.89    3.59
   0  -8 -11   68.94    3.22
   0   8 -12  158.58    5.26
   0   8 -12  162.62    5.32
   0   8 -12  162.91    6.10
   0   8  12  161.57    7.53
   0   8 -12  160.87    6.79
   0  -8 -12  172.79    6.22
   0  -8 -13   97.94    4.41
   0   8 -13   88.78    4.28
   0   8  13   89.69    5.14
   0   8 -14    8.14    1.39
   0  -8  14    5.52    1.33
   0  -8 -14    8.74    1.35
   0   8  14    7.01    1.59
   0   8  15  232.51    7.33
   0   8 -15  240.69    6.89
   0  -8 -15  247.50    6.89
   0  -8  15  252.22    7.26
   0  -8  16  164.16    4.96
   0  -8 -16  171.34    4.92
   0   8 -16  169.04    4.94
   0  -9   0   -0.07    0.83
   0   9   0    1.27    0.82
   0   9   0   -0.23    0.89
   0   9   0    0.23    0.85
   0   9   0    1.07    1.01
   0   9   1   26.22    2.28
   0   9   1   25.85    2.41
   0   9   1   24.07    2.37
   0   9  -1   26.28    2.53
   0   9  -1   25.24    2.46
   0  -9   1   23.73    2.17
   0   9  -1   24.02    2.29
   0  -9  -1   26.04    2.20
   0   9  -1   25.40    2.34
   0   9   1   25.69    2.23
   0   9   2   58.45    3.27
   0  -9  -2   65.08    3.07
   0  -9  -2   62.63    3.30
   0   9   2   65.84    3.84
   0   9  -2   66.15    3.76
   0   9   2   64.07    3.83
   0   9   2   65.11    3.42
   0   9  -2   68.64    4.05
   0   9  -2   66.42    3.98
   0   9  -2   67.65    3.80
   0  -9   2   60.29    3.59
   0   9  -3  813.65   17.93
   0  -9  -3  796.10   16.79
   0  -9  -3  794.12   16.43
   0   9  -3  788.33   18.34
   0   9  -3  809.86   17.87
   0   9   3  789.70   16.79
   0  -9   3  784.49   17.86
   0   9   3  793.92   16.76
   0  -9   4    0.98    1.08
   0   9   4    1.34    0.79
   0   9  -4    0.09    1.06
   0   9  -4    0.35    1.05
   0   9  -4    3.17    1.25
   0  -9  -4    3.07    1.08
   0   9   4    1.16    0.75
   0  -9  -4    1.47    0.78
   0  -9  -4    0.44    0.69
   0  -9  -5  274.57    7.72
   0   9  -5  272.20    9.05
   0  -9   5  262.95    8.74
   0  -9  -5  263.00    7.45
   0   9  -5  266.48    8.53
   0   9  -5  270.61    8.54
   0  -9  -6  647.65   14.19
   0   9  -6  598.87   13.54
   0  -9  -6  616.46   14.38
   0  -9  -6  617.45   13.58
   0  -9   6  636.31   15.72
   0   9  -6  641.72   15.94
   0  -9  -7    1.40    0.70
   0   9  -7    0.09    1.09
   0  -9   7    0.81    1.23
   0   9  -7    0.70    1.00
   0   9  -7    1.76    0.89
   0  -9  -7    1.05    0.73
   0  -9  -7    1.63    0.95
   0   9  -7    1.72    1.19
   0  -9   8  690.37   16.58
   0   9  -8  670.25   15.50
   0  -9  -8  624.13   14.01
   0   9  -8  619.95   14.41
   0  -9  -8  670.12   14.93
   0   9  -8  642.28   16.40
   0   9  -8  672.53   15.49
   0   9  -9  322.58    8.98
   0  -9   9  340.54   10.48
   0   9  -9  336.73    9.46
   0  -9  -9  341.41    9.28
   0   9  -9  327.75   10.48
   0  -9  -9  319.92    8.57
   0   9  -9  323.43    9.37
   0  -9 -10   24.17    2.23
   0   9 -10   20.31    2.02
   0   9 -10   21.07    2.03
   0   9 -10   17.25    2.24
   0  -9  10   21.57    2.54
   0   9 -11  803.34   16.78
   0  -9 -11  804.49   17.25
   0   9 -11  795.25   17.15
   0   9 -11  793.32   16.70
   0  -9  11  837.88   18.70
   0   9 -12   45.81    2.50
   0  -9 -12   51.21    2.99
   0  -9  12   52.10    3.44
   0   9 -12   49.35    2.57
   0   9  12   52.06    3.56
   0   9 -12   51.33    3.00
   0   9  13    0.77    0.86
   0   9 -13    1.53    0.81
   0  -9 -13    1.73    0.82
   0   9 -14  168.38    5.16
   0  -9 -14  177.41    5.26
   0  -9  15    0.60    0.55
   0  -9 -15    0.36    0.50
   0   9 -15    0.83    0.52
   0  10   0 3839.15   67.47
   0  10   0 3696.34   66.09
   0  10   0 3789.21   67.27
   0 -10   0 3748.72   65.83
   0  10   0 3722.57   66.14
   0  10  -1    6.68    1.61
   0 -10  -1    4.47    0.94
   0  10   1    4.57    1.26
   0  10  -1    3.18    1.37
   0 -10  -1    5.31    1.29
   0 -10   1    4.16    1.27
   0  10  -1    6.23    1.58
   0  10   1    5.64    1.35
   0  10  -1    5.24    1.46
   0  10   1    5.63    1.52
   0  10   1    3.71    1.27
   0  10  -2 1014.92   21.95
   0  10   2  990.19   20.29
   0  10   2  943.21   21.41
   0  10  -2 1009.79   21.18
   0 -10  -2  944.92   19.13
   0  10  -2  993.06   21.91
   0 -10   2  983.81   20.86
   0  10   2  973.36   20.28
   0  10  -2  989.95   21.08
   0 -10  -2  995.33   20.22
   0  10   3   39.16    2.58
   0 -10  -3   38.18    2.57
   0  10  -3   34.39    2.86
   0  10  -3   37.03    3.12
   0  10  -3   39.23    3.24
   0  10   3   38.70    2.56
   0 -10   3   35.78    2.85
   0 -10  -3   36.12    2.91
   0  10  -3   38.85    3.03
   0 -10  -3   35.17    2.30
   0  10  -4 1922.92   36.77
   0  10  -4 1909.06   35.91
   0  10  -4 1913.53   35.93
   0  10   4 1808.55   33.77
   0  10  -4 1882.59   36.70
   0  10   4 1835.91   33.80
   0 -10   4 1895.77   35.87
   0 -10  -4 1841.60   34.16
   0 -10  -4 1832.56   33.85
   0 -10  -4 1786.49   35.26
   0 -10  -5  174.84    6.36
   0  10  -5  191.71    7.50
   0  10  -5  195.69    7.07
   0 -10   5  197.01    7.20
   0  10  -5  195.69    7.07
   0 -10  -5  188.59    5.96
   0 -10  -5  192.09    6.07
   0 -10  -6  223.39    6.80
   0  10  -6  229.25    8.34
   0 -10   6  224.89    7.92
   0  10  -7   31.27    2.96
   0 -10   7   38.83    3.15
   0 -10  -7   32.57    2.39
   0  10  -8   14.40    1.90
   0 -10   8   17.64    2.22
   0  10  -8   16.29    2.16
   0  10  -8   15.71    1.92
   0 -10  -8   16.07    1.72
   0  10  -9    7.89    1.22
   0 -10  -9    7.44    1.27
   0  10  -9    6.91    1.37
   0  10  -9    6.38    1.32
   0 -10   9    6.78    1.57
   0  10 -10  536.18   12.29
   0  10 -10  504.21   11.65
   0  10 -10  528.40   12.27
   0 -10 -10  534.90   12.15
   0 -10  10  539.35   13.42
   0 -10 -11   56.94    2.92
   0  10 -11   57.64    2.81
   0 -10  11   55.01    3.35
   0  10 -11   53.66    2.75
   0  10 -11   54.79    2.78
   0 -10  12   26.07    2.20
   0  10 -12   22.67    1.55
   0 -10 -12   26.06    1.86
   0  10 -12   24.67    1.61
   0  10 -12   25.56    1.76
   0 -10 -13   28.64    1.80
   0  10 -13   27.42    1.68
   0  11   0    0.39    0.97
   0  11   0    0.23    0.88
   0  11   0    0.76    1.04
   0 -11   0    0.58    0.81
   0  11   0    0.49    0.85
   0  11  -1 1104.29   23.26
   0 -11   1 1050.74   21.84
   0  11   1 1062.64   21.77
   0 -11  -1 1066.60   21.57
   0  11  -1 1046.83   23.17
   0  11   1 1078.81   21.82
   0  11  -1 1046.72   22.08
   0  11  -2  417.01   11.11
   0  11   2  412.23   10.39
   0 -11   2  415.00   10.90
   0  11  -2  405.67   11.74
   0  11  -2  432.59   11.92
   0 -11  -2  406.01   10.23
   0 -11  -2  388.09   11.12
   0  11   2  415.27   10.41
   0  11  -3   85.24    4.33
   0 -11  -3   77.48    3.60
   0  11  -3   82.31    4.28
   0 -11  -3   75.98    4.01
   0  11   3   79.82    3.62
   0 -11   3   82.80    4.20
   0  11  -3   77.71    4.48
   0  11   3   78.25    3.58
   0  11  -3   79.04    4.55
   0  11  -4  107.77    4.94
   0  11  -4  106.04    5.28
   0 -11   4  105.53    4.81
   0  11  -4  110.39    4.98
   0  11  -4   97.42    5.13
   0 -11  -4   95.62    3.70
   0 -11   5  759.10   16.85
   0 -11  -5  700.57   14.83
   0  11  -5  757.28   17.58
   0  11  -5  745.66   16.70
   0  11  -5  717.85   17.42
   0 -11  -6   15.17    1.48
   0  11  -6   16.05    2.14
   0  11  -6   15.00    1.92
   0 -11   6   14.02    1.85
   0  11  -7  177.16    6.77
   0 -11  -7  167.81    5.24
   0 -11   7  171.20    6.28
   0  11  -8    6.71    1.51
   0  11  -8    6.37    1.26
   0  11  -8    5.65    1.26
   0 -11  -8    6.39    1.01
   0 -11   8    5.98    1.31
   0 -11  -9    9.77    1.15
   0  11  -9   11.02    1.44
   0  11  -9    9.27    1.37
   0 -11   9   11.08    1.59
   0  11  -9   11.28    1.66
   0 -11  10  186.72    6.04
   0  11 -10  183.62    5.49
   0  11 -10  194.30    6.46
   0 -11 -10  178.95    5.09
   0  11 -10  179.56    5.44
   0  11 -11   71.49    2.80
   0  11 -11   80.15    3.68
   0 -11 -11   71.84    2.72
   0  11 -11   73.64    2.82
   0 -11  11   76.59    3.39
   0 -11  12   53.66    2.56
   0  11 -12   56.95    2.81
   0  12   0    4.15    1.09
   0  12   0    4.55    1.10
   0 -12   0    4.02    0.99
   0  12   1    1.16    0.79
   0  12   1    0.67    0.74
   0  12  -1   -0.35    0.90
   0 -12   1    0.06    0.71
   0  12  -1    1.17    0.85
   0 -12  -1   -0.06    0.67
   0  12  -2   92.44    4.23
   0  12   2   88.66    3.69
   0  12  -2   93.54    4.26
   0  12  -2   94.47    4.54
   0  12   2   91.19    3.72
   0 -12   2   94.70    4.07
   0 -12  -2   86.15    3.55
   0 -12   3   48.01    2.89
   0  12  -3   49.75    3.10
   0  12  -3   51.94    3.33
   0  12  -3   48.87    3.07
   0  12  -4  794.80   17.39
   0 -12   4  757.45   16.41
   0  12  -4  770.03   16.70
   0  12  -4  754.32   16.62
   0  12  -5    8.18    1.40
   0  12  -5    8.90    1.51
   0 -12   5    8.31    1.33
   0  12  -5    7.78    1.39
   0  12  -6   21.80    1.97
   0 -12   6   21.49    1.92
   0  12  -6   17.83    1.95
   0  12  -6   20.27    1.93
   0 -12   7  115.63    4.40
   0  12  -7  112.81    4.71
   0  12  -8   17.59    1.60
   0  12  -8   18.12    1.63
   0  12  -8   20.99    1.89
   0 -12   8   17.27    1.64
   0  12  -9   19.75    1.73
   0  12  -9   19.30    1.51
   0  12  -9   19.34    1.51
   0 -12   9   17.75    1.53
   0  13   0   -0.05    0.54
   0  13   0    0.69    0.65
   0  13   1  128.80    4.08
   0  13   1  130.37    4.09
   0  13  -1  135.59    4.48
   0  13  -1  135.93    4.46
   0 -13   1  127.14    4.06
   0 -13   2   10.89    1.18
   0  13  -2   13.78    1.43
   0  13  -2   12.11    1.37
   0  13  -3   66.16    3.07
   0  13  -3   68.31    3.09
   0 -13   3   68.72    2.89
   0 -13   4    6.87    0.96
   0  13  -4    7.73    1.13
   0  13  -4    7.07    1.11
   0 -13   5    1.13    0.60
   0  13  -5    2.61    0.78
   0  13  -5    1.82    0.76
   0  13  -6  303.12    7.30
   0  13  -6  282.62    7.30
   0  13  -6  305.65    7.33
   0 -13   6  295.08    7.00
  -1   0  20   83.68    3.44
  -1   0  19    0.22    0.84
   1   0 -18 2148.71   38.83
   1   0 -18 2168.24   38.99
   1   0 -17    0.84    0.75
  -1   0  17    0.43    1.17
   1   0 -17    0.79    0.86
   1   0 -16  201.02    7.24
  -1   0  16  198.15    8.20
   1   0 -16  208.53    6.84
   1   0 -16  208.68    6.68
   1   0 -16  204.96    7.29
  -1   0  15    0.25    1.32
   1   0 -15    0.43    0.83
   1   0 -15   -0.46    0.93
   1   0 -15    0.54    0.96
  -1   0  15    1.21    0.93
   1   0 -15    0.09    0.96
   1   0 -14  728.93   16.21
   1   0 -14  703.72   16.57
   1   0 -14  724.98   16.76
  -1   0  14  749.71   18.67
   1   0 -14  724.50   15.93
  -1   0  13    1.65    1.40
   1   0 -13    0.65    0.73
   1   0 -13    0.16    0.87
   1   0 -13    0.32    0.87
   1   0 -13    0.78    0.84
   1   0 -12  490.51   11.75
   1   0 -12  471.00   11.49
   1   0 -12  458.40   10.93
  -1   0  12  475.19   13.28
   1   0 -12  441.69   11.13
   1   0 -11   -0.10    0.58
   1   0 -11    0.44    0.70
  -1   0  11    0.56    0.68
   1   0 -11    0.06    0.67
   1   0 -11    1.67    0.90
  -1   0  11    0.92    1.10
   1   0 -10   93.18    3.52
   1   0 -10   96.72    3.78
   1   0 -10   97.03    3.83
   1   0 -10  105.90    4.02
  -1   0  10  100.79    4.37
  -1   0  10   98.47    4.85
   1   0  -9    0.05    0.49
   1   0  -9    0.48    0.59
  -1   0   9    0.08    0.91
   1   0  -9    0.09    0.66
  -1   0   9    0.12    0.65
   1   0  -9    2.13    0.64
   1   0  -8  480.85   10.32
  -1   0   8  469.26   11.82
  -1   0   8  478.46   10.77
   1   0  -8  493.30   10.17
   1   0  -8  479.84    9.82
   1   0  -7    3.51    0.72
  -1   0   7    0.37    0.59
   1   0  -6 1132.40   20.19
  -1   0   6 1135.54   20.65
   1   0  -5    0.80    0.43
  -1   0   5    0.39    0.48
   1   0  -3    0.44    0.40
  -1   0   3    0.39    0.42
   1   0  -3    0.38    0.31
   1   0  -2  117.49    2.62
  -1   0   2  114.87    2.64
   1   0  -2  115.48    2.51
  -1   0   1    0.48    0.24
   1   0  -1    0.03    0.19
   1   0  -1    0.62    0.17
   1   0   1    1.09    0.14
  -1   0  -1    0.56    0.13
  -1   0  -3    1.82    0.30
  -1   0  -3    0.83    0.29
  -1   0  -4 1853.12   31.62
   1   0   4 1923.36   31.56
  -1   0  -5    0.44    0.30
  -1   0  -5    0.10    0.35
   1   0   5    0.46    0.35
   1   0   6 4155.33   69.02
  -1   0  -7    0.14    0.52
  -1   0  -7    0.59    0.51
  -1   0  -7    0.80    0.54
  -1   0  -7    0.26    0.41
   1   0   7   -0.06    0.44
  -1   0  -8 3651.97   61.80
  -1   0  -8 3686.04   61.70
  -1   0  -8 3625.57   61.84
  -1   0  -8 3584.95   61.78
   1   0   8 3715.53   61.82
  -1   0  -8 3710.26   61.52
  -1   0  -8 3584.93   61.93
  -1   0  -9    0.82    0.62
  -1   0  -9    0.66    0.63
  -1   0  -9    2.40    0.75
   1   0   9   -0.05    0.56
  -1   0  -9    0.05    0.53
  -1   0  -9    0.69    0.53
  -1   0  -9    1.16    0.67
  -1   0 -10 1991.33   36.18
  -1   0 -10 2015.78   36.14
  -1   0 -10 1977.03   35.83
  -1   0 -10 2005.80   36.07
   1   0  10 2029.05   36.39
  -1   0 -10 2122.62   36.58
  -1   0 -11    0.88    0.78
   1   0  11    0.73    1.22
  -1   0 -11   -0.30    0.73
  -1   0 -11    0.23    0.64
  -1   0 -12   37.39    2.54
  -1   0 -12   36.40    2.48
   1   0  12   37.90    3.57
  -1   0 -12   37.79    2.62
  -1   0 -12   35.54    2.46
  -1   0 -13    0.47    0.82
  -1   0 -13    2.32    0.90
  -1   0 -13    0.43    0.79
   1   0  13   -0.13    1.26
  -1   0 -13    1.38    0.98
  -1   0 -14   11.80    1.52
  -1   0 -14   10.98    1.58
  -1   0 -14   11.48    1.71
   1   0  14    9.79    2.10
  -1   0 -14    9.42    1.44
  -1   0 -15   -0.07    0.66
  -1   0 -15    0.41    0.77
   1   0  15   -0.12    1.06
  -1   0 -15   -0.15    0.75
  -1   0 -15    1.00    1.01
  -1   0 -16   66.52    3.36
   1   0  16   71.28    4.56
  -1   0 -16   71.92    3.89
  -1   0 -16   66.82    3.32
  -1   0 -17   -0.07    0.90
   1   0  17    0.97    1.07
  -1   0 -17    0.39    0.63
   1   0  18 1069.37   21.45
  -1   0 -18 1090.75   20.57
   1   0  19    0.55    0.58
  -1   0 -19    0.09    0.54
  -1   1  20  111.90    4.08
  -1  -1  20  101.30    3.70
   1  -1 -19  392.70    8.97
   1   1 -19  391.38    8.95
  -1  -1  19  413.02   10.30
  -1   1  18  625.94   15.07
  -1  -1  18  597.55   14.51
   1   1 -18  587.16   13.11
   1  -1 -18  582.29   13.00
   1   1 -17  825.89   17.40
   1  -1 -17  871.53   18.14
  -1  -1  17  898.32   20.08
   1  -1 -17  823.83   17.20
   1   1 -17  916.78   18.60
  -1   1  17  898.11   20.60
   1  -1 -16   69.16    3.92
   1  -1 -16   65.97    3.57
  -1  -1  16   62.31    3.63
   1  -1 -16   63.83    3.34
   1   1 -16   70.17    3.86
  -1   1  16   72.11    4.78
   1   1 -16   65.47    3.95
   1   1 -16   66.43    3.37
  -1  -1  16   67.52    4.43
   1  -1 -16   63.59    3.76
  -1  -1  15  171.17    6.70
   1  -1 -15  176.04    6.65
   1   1 -15  170.94    5.92
   1  -1 -15  181.67    6.65
   1  -1 -15  170.18    6.17
   1   1 -15  175.65    6.83
   1   1 -15  188.21    6.67
   1  -1 -15  182.31    6.10
  -1  -1  15  183.00    7.58
  -1   1  15  194.58    8.20
   1   1 -15  178.73    6.84
   1  -1 -14  165.18    5.96
   1  -1 -14  166.50    5.82
  -1   1  14  172.81    7.69
   1   1 -14  173.13    6.64
   1  -1 -14  165.69    6.22
  -1  -1  14  175.73    7.39
   1  -1 -14  176.88    6.46
   1   1 -14  173.29    6.60
  -1  -1  14  158.97    6.56
   1   1 -14  163.37    6.17
   1   1 -14  163.70    5.68
   1  -1 -13  116.47    4.73
   1  -1 -13  120.45    4.68
  -1  -1  13  125.67    6.03
   1  -1 -13  116.80    4.97
   1   1 -13  113.27    4.46
  -1   1  13  126.48    6.47
   1  -1 -13  114.57    4.93
   1   1 -13  117.16    5.16
   1   1 -13  119.09    5.16
   1   1 -13  119.41    4.97
   1  -1 -12  292.47    8.30
   1  -1 -12  278.63    7.89
  -1   1  12  287.78   10.13
   1   1 -12  284.06    7.63
  -1  -1  12  303.98    9.64
   1  -1 -12  286.34    8.17
   1   1 -12  286.14    8.24
   1   1 -12  295.94    8.57
   1   1 -12  293.62    8.46
   1  -1 -12  278.27    7.85
   1  -1 -11 4835.49   79.86
   1   1 -11 4738.86   80.00
   1   1 -11 4716.57   80.33
   1  -1 -11 4545.26   79.33
   1  -1 -11 4786.21   79.49
  -1   1  11 4417.51   81.11
  -1  -1  11 4771.12   82.13
  -1   1  11 4811.17   83.29
   1   1 -11 4482.31   78.96
   1  -1 -11 4737.55   79.97
   1   1 -10 2462.29   43.52
  -1   1  10 2534.27   47.23
  -1  -1  10 2420.05   45.00
  -1   1  10 2453.33   45.46
   1  -1 -10 2489.12   43.83
   1  -1 -10 2572.94   44.23
   1  -1 -10 2527.43   43.82
   1   1 -10 2499.33   44.29
   1  -1 -10 2574.98   44.36
  -1  -1  10 2555.75   46.21
  -1   1   9 1064.80   21.87
  -1  -1   9 1110.70   21.64
   1  -1  -9 1153.74   20.99
  -1   1   9 1049.30   23.35
  -1  -1   9 1124.76   22.64
   1   1  -9 1145.03   21.10
   1   1  -9 1061.84   20.28
   1  -1  -9 1088.01   20.60
   1  -1  -9 1115.49   21.07
   1  -1  -9 1107.35   21.01
   1  -1  -9 1154.35   20.73
   1   1  -8  249.03    6.33
  -1  -1   8  242.76    6.58
  -1  -1   8  254.53    7.34
   1   1  -8  240.69    6.37
   1  -1  -8  246.49    6.30
  -1   1   8  228.32    7.64
   1  -1  -8  251.61    6.05
  -1   1   8  251.10    6.89
   1  -1  -8  245.53    6.00
   1   1  -8  256.39    6.33
  -1  -1   7 6719.30  111.72
   1   1  -7 6542.50  110.42
  -1  -1   7 6758.72  110.78
   1  -1  -6  696.48   13.27
   1   1  -6  700.02   13.23
  -1  -1   6  686.24   13.42
  -1   1   6  703.32   13.76
  -1   1   4   22.47    1.33
   1   1  -4   23.51    1.13
   1   1  -4   25.33    1.24
  -1  -1   4   23.56    1.24
   1  -1  -4   23.06    1.19
   1  -1  -3 2583.05   43.19
  -1   1   1 1764.06   29.45
   1   1   0  338.14    5.81
   1  -1   0  343.17    6.24
  -1   1   0  330.43    6.24
   1   1   0  353.31    5.94
  -1  -1  -2  164.89    3.10
  -1  -1  -2  172.50    3.04
   1  -1   2  167.56    3.50
  -1  -1  -2  170.48    3.05
   1  -1   4  961.72   16.42
   1   1   4  942.11   16.21
  -1   1  -4  905.05   16.51
  -1   1  -4  959.98   16.52
  -1  -1  -4  944.72   15.99
  -1  -1  -4  922.76   16.10
  -1  -1  -5  981.45   17.29
   1  -1   5  993.41   17.58
  -1   1  -5  984.38   17.64
   1   1   5 1018.47   17.46
  -1  -1  -5  999.96   17.17
  -1   1  -5  983.51   17.70
  -1  -1  -6 1437.98   25.03
  -1  -1  -6 1423.98   24.85
   1  -1   6 1478.07   25.34
  -1   1  -6 1468.77   25.40
   1   1   6 1471.08   25.27
  -1   1  -6 1441.23   25.46
   1   1   7  550.00   10.73
  -1   1  -7  526.95   10.78
  -1   1  -7  528.60   10.81
  -1  -1  -7  526.00   10.22
  -1  -1  -7  516.18   10.82
  -1   1  -7  542.04   10.76
   1  -1   7  539.72   10.71
  -1  -1  -7  535.89   10.41
  -1   1  -7  524.37   10.93
   1  -1   8  139.69    4.21
  -1  -1  -8  141.43    4.03
  -1  -1  -8  142.67    4.35
  -1   1  -8  139.65    4.27
   1   1   8  136.46    4.19
  -1  -1  -8  138.55    3.84
  -1   1  -8  138.06    4.27
  -1   1  -8  139.26    4.22
  -1  -1  -8  135.69    4.03
  -1   1  -8  134.90    4.32
  -1   1  -8  138.00    4.32
  -1  -1  -9 4889.00   81.37
  -1  -1  -9 4815.93   81.45
  -1   1  -9 4764.82   81.70
  -1   1  -9 4805.67   81.96
  -1  -1  -9 4910.68   81.28
   1  -1   9 5025.16   81.90
  -1   1  -9 4904.05   81.85
  -1  -1  -9 4964.35   82.01
   1  -1   9 4722.99   84.46
  -1  -1  -9 4773.79   81.05
  -1   1  -9 4887.64   81.90
  -1  -1  -9 4715.42   81.77
   1   1   9 4944.85   81.86
  -1   1  -9 4751.35   81.95
  -1  -1 -10 3104.22   54.77
  -1  -1 -10 3067.13   53.82
  -1  -1 -10 3201.48   54.90
  -1   1 -10 3169.80   54.81
   1  -1  10 3104.77   54.73
   1  -1  10 3098.64   57.30
  -1   1 -10 3081.30   54.82
  -1  -1 -10 3160.39   54.23
  -1  -1 -10 3236.67   54.13
  -1   1 -10 3200.82   54.82
  -1  -1 -10 3075.85   54.33
  -1   1 -10 3316.70   55.02
  -1   1 -11  523.76   11.96
  -1   1 -11  531.12   12.19
  -1  -1 -11  525.74   11.69
  -1   1 -11  527.49   12.16
   1  -1  11  533.87   14.14
  -1  -1 -11  517.80   12.22
  -1  -1 -11  511.51   11.53
  -1  -1 -11  520.64   11.84
  -1   1 -11  541.32   12.30
  -1  -1 -12  229.88    7.17
   1   1  12  217.90    9.21
  -1  -1 -12  205.15    6.21
  -1  -1 -12  219.99    6.61
   1  -1  12  232.22    8.48
  -1   1 -12  220.56    6.94
  -1   1 -12  208.75    6.81
  -1   1 -12  217.42    6.93
  -1  -1 -12  223.50    6.67
  -1   1 -12  223.12    6.74
  -1  -1 -13   13.25    1.62
  -1   1 -13   10.63    1.55
   1  -1  13   13.39    2.17
  -1   1 -13   12.98    1.57
  -1   1 -13   13.64    1.77
  -1  -1 -13   10.91    1.71
  -1  -1 -13   13.17    1.57
  -1  -1 -13   11.69    1.47
  -1   1 -13   11.02    1.61
   1   1  13   10.28    2.26
   1   1  14   46.16    4.18
   1  -1  14   45.33    3.67
  -1   1 -14   41.25    2.92
  -1  -1 -14   38.05    2.43
  -1   1 -14   41.77    2.78
  -1  -1 -14   42.03    2.77
  -1  -1 -14   41.05    2.96
  -1   1 -14   38.86    2.87
  -1   1 -14   44.38    3.03
  -1   1 -15   77.45    4.07
  -1  -1 -15   84.76    3.92
  -1  -1 -15   83.79    4.32
  -1   1 -15   78.34    4.03
  -1  -1 -15   77.75    3.82
  -1   1 -15   82.47    3.93
   1  -1  15   89.64    5.06
  -1  -1 -15   80.59    3.52
  -1   1 -15   79.51    4.16
   1   1  15   91.34    5.57
  -1   1 -16  224.91    6.87
  -1   1 -16  205.37    7.07
   1   1  16  244.99    9.10
  -1  -1 -16  224.67    6.77
  -1   1 -16  218.72    7.08
  -1  -1 -16  249.00    7.75
   1  -1  16  240.68    8.45
  -1   1 -16  236.32    7.48
   1  -1  17 1045.52   23.06
  -1   1 -17 1069.38   21.14
   1  -1  17 1076.00   22.71
   1   1  17 1089.14   23.67
  -1  -1 -17 1100.73   22.11
  -1   1 -17 1074.76   21.76
   1  -1  18  319.51    8.62
  -1  -1 -18  332.61    8.48
  -1   1 -18  319.26    8.18
   1  -1  18  302.43    8.47
   1   1  18  325.36    9.31
   1  -1  19  441.24   10.18
  -1  -1 -19  503.26   10.55
   1   1  19  493.64   11.12
  -1   1 -19  451.58    9.94
  -1   2  20   50.70    2.62
   1  -2 -19   63.53    2.82
  -1  -2  19   64.89    3.18
   1   2 -19   66.77    2.93
  -1   2  19   68.87    3.63
  -1   2  18    3.84    1.34
   1  -2 -18    2.84    0.91
  -1  -2  18    1.95    1.04
   1   2 -18    3.16    0.99
  -1  -2  17   75.70    4.30
  -1   2  17   84.23    4.90
   1  -2 -17   74.17    3.85
   1   2 -17   84.67    4.10
   1  -2 -17   79.10    3.82
   1  -2 -16    2.36    1.06
   1   2 -16    2.02    1.18
  -1  -2  16    1.93    0.99
   1  -2 -16    0.82    0.85
  -1   2  16    3.41    1.60
  -1  -2  16    1.66    1.24
   1   2 -16    3.36    1.17
   1  -2 -16    1.72    0.98
   1   2 -15  327.54    9.60
   1  -2 -15  315.10    9.36
  -1  -2  15  333.14   10.48
  -1   2  15  333.51   11.41
   1   2 -15  313.78    8.42
   1  -2 -15  317.99    8.26
   1  -2 -15  297.68    9.12
   1   2 -15  320.72    9.84
   1  -2 -15  316.16    9.16
  -1  -2  15  304.12    9.68
   1  -2 -14   38.39    2.86
   1  -2 -14   33.44    2.64
   1   2 -14   31.64    2.74
  -1  -2  14   30.60    2.99
   1  -2 -14   33.33    2.29
  -1  -2  14   34.03    3.00
   1   2 -14   29.54    2.73
   1   2 -14   29.32    2.20
  -1   2  14   34.79    3.63
   1  -2 -14   31.17    2.55
   1   2 -13   10.17    1.63
   1  -2 -13    7.59    1.45
   1  -2 -13    8.46    1.27
  -1  -2  13    8.12    1.68
  -1   2  13    9.02    2.03
   1  -2 -13    7.67    1.38
   1   2 -13    8.27    1.54
  -1  -2  13    8.39    1.60
   1   2 -13    8.83    1.59
   1  -2 -13   10.38    1.52
   1   2 -13    9.90    1.29
   1   2 -12   19.29    1.65
   1  -2 -12   17.85    1.83
   1  -2 -12   16.92    1.84
  -1  -2  12   20.93    2.36
   1   2 -12   17.61    1.93
   1  -2 -12   17.94    1.82
  -1   2  12   16.98    2.57
  -1  -2  11  401.63   11.04
   1   2 -11  373.01    9.06
   1  -2 -11  405.25    9.83
   1  -2 -11  403.73    9.90
   1  -2 -11  402.39    9.27
   1  -2 -11  388.40    9.70
   1  -2 -10   74.13    2.99
  -1   2  10   72.56    3.91
  -1  -2  10   76.24    3.94
   1  -2 -10   75.22    3.29
   1   2 -10   67.50    2.83
   1  -2 -10   70.71    3.16
  -1  -2  10   71.22    3.62
   1  -2 -10   74.62    3.31
  -1  -2   9 1148.84   22.85
  -1   2   9 1161.49   23.44
   1   2  -9 1138.04   21.32
   1  -2  -9 1184.33   22.12
   1  -2  -9 1164.94   21.95
   1  -2  -9 1196.72   21.61
   1   2  -9 1227.20   22.68
  -1  -2   9 1211.05   23.48
   1  -2  -8   20.96    1.56
   1   2  -8   22.56    1.76
  -1  -2   8   24.63    1.83
   1  -2  -8   27.91    1.68
   1  -2  -8   22.78    1.62
   1  -2  -8   25.66    1.70
   1   2  -8   24.48    1.79
  -1  -2   8   23.75    1.98
  -1   2   8   21.76    1.89
   1   2  -8   24.29    1.77
   1   2  -8   21.54    1.70
   1  -2  -7   76.39    2.84
  -1   2   7   81.40    3.44
   1   2  -7   76.76    3.01
  -1  -2   7   78.84    3.33
   1  -2  -7   77.87    2.79
   1  -2  -7   78.36    2.96
   1   2  -7   78.77    3.02
  -1  -2   7   79.12    3.12
   1   2  -7   75.18    2.94
   1  -2  -6   92.62    3.13
   1   2  -6   90.68    3.07
  -1   2   6   96.50    3.56
  -1  -2   6   97.06    3.26
  -1  -2   5 2102.63   36.30
   1   2  -5 2121.54   36.16
   1   2  -5 2078.88   36.35
  -1   2   5 2116.97   36.87
   1  -2  -5 2144.29   36.38
  -1   2   4 1164.46   20.95
   1   2  -4 1151.98   20.42
   1   2  -4 1148.95   20.23
  -1  -2   4 1140.99   20.33
   1  -2  -3  648.86   12.41
  -1  -2   3  683.88   12.27
  -1   2   3  667.16   12.81
   1   2  -3  672.57   12.13
   1   2  -3  670.46   12.30
   1   2  -2  679.99   12.13
  -1   2   2  651.77   12.42
   1  -2  -2  698.56   12.74
   1  -2  -2  699.75   12.50
   1   2  -2  692.14   12.31
   1   2  -1  245.88    4.89
   1  -2  -1  246.47    5.42
   1  -2  -1  248.43    5.11
  -1   2   1  236.57    5.05
   1   2  -1  237.93    4.74
   1   2   0 1275.78   21.38
   1  -2   0 1299.66   21.75
  -1   2   0 1294.76   21.79
   1   2   0 1239.87   21.21
  -1  -2   0 1255.37   21.35
  -1   2   0 1255.48   21.69
   1  -2   1  186.55    4.08
   1   2   1  194.81    3.69
   1   2   1  186.85    3.61
  -1  -2  -1  191.25    3.68
  -1  -2  -2   36.78    1.26
  -1  -2  -2   36.66    1.13
   1  -2   2   36.14    1.44
   1  -2   3   29.02    1.34
  -1  -2  -3   28.55    1.08
  -1  -2  -3   27.85    1.05
  -1  -2  -3   28.37    1.03
  -1   2  -3   27.09    1.32
  -1  -2  -4 1333.03   23.06
   1  -2   4 1380.30   23.66
  -1  -2  -4 1350.28   23.07
  -1  -2  -4 1367.04   23.01
  -1   2  -4 1383.65   23.79
   1  -2   5  720.10   13.29
  -1   2  -5  725.11   13.44
   1   2   5  708.73   13.08
  -1  -2  -5  706.43   12.72
  -1  -2  -5  708.04   12.61
  -1   2  -5  679.44   13.37
  -1   2  -6  147.97    4.27
   1  -2   6  157.23    4.21
  -1  -2  -6  153.93    3.78
  -1  -2  -6  151.23    3.65
  -1  -2  -6  153.49    4.14
   1   2   6  150.99    4.09
  -1   2  -6  152.17    4.30
  -1  -2  -7   96.29    3.23
   1  -2   7   96.93    3.33
  -1  -2  -7   98.24    3.27
  -1   2  -7  100.00    3.47
  -1   2  -7   97.99    3.32
  -1  -2  -7   96.59    2.96
  -1  -2  -7   98.12    2.86
   1   2   7  100.29    3.33
  -1   2  -7   94.99    3.40
  -1  -2  -7  100.29    3.39
  -1   2  -7   94.55    3.32
  -1  -2  -8  846.77   16.48
  -1   2  -8  857.01   16.76
  -1  -2  -8  857.30   15.94
  -1  -2  -8  835.00   16.00
  -1   2  -8  832.56   16.53
  -1  -2  -8  852.16   15.68
  -1  -2  -8  834.69   16.32
   1  -2   8  847.62   17.74
  -1   2  -8  866.05   16.78
   1  -2   8  874.95   16.59
  -1   2  -8  831.97   16.46
  -1   2  -8  864.34   16.88
  -1  -2  -8  847.50   16.62
   1   2   8  863.74   16.53
  -1   2  -9   40.31    2.39
  -1   2  -9   42.20    2.33
   1  -2   9   39.54    2.28
  -1   2  -9   38.56    2.26
  -1  -2  -9   37.57    2.23
   1  -2   9   36.32    2.64
  -1  -2  -9   37.43    2.02
   1   2   9   38.24    2.23
  -1  -2  -9   38.37    2.00
  -1  -2  -9   37.31    1.86
  -1  -2  -9   40.02    2.35
  -1  -2  -9   38.01    1.84
  -1  -2 -10  732.73   14.82
   1  -2  10  746.95   16.92
  -1  -2 -10  736.51   14.73
  -1   2 -10  741.43   15.66
  -1  -2 -10  764.53   15.57
  -1   2 -10  734.77   15.36
  -1   2 -10  719.90   15.26
  -1   2 -10  772.48   15.84
  -1  -2 -10  701.35   14.15
   1  -2  10  716.41   15.43
  -1  -2 -11  156.95    5.57
  -1  -2 -11  154.32    4.63
  -1   2 -11  153.57    5.38
  -1   2 -11  172.91    5.85
   1  -2  11  153.80    6.22
  -1  -2 -11  149.55    5.01
  -1   2 -11  151.73    5.32
  -1   2 -11  153.33    5.55
  -1  -2 -11  154.58    5.00
  -1   2 -12   39.51    2.62
  -1  -2 -12   38.45    2.45
  -1   2 -12   36.68    2.77
  -1  -2 -12   37.20    2.36
  -1  -2 -12   41.80    2.86
  -1   2 -12   36.56    2.60
  -1   2 -12   37.94    2.78
   1  -2  12   35.83    3.01
  -1  -2 -13   46.43    3.23
  -1   2 -13   47.64    3.17
   1   2  13   51.35    4.63
  -1   2 -13   46.20    2.96
  -1  -2 -13   48.33    2.86
  -1  -2 -13   52.94    2.92
   1  -2  13   52.12    3.67
  -1   2 -13   49.73    3.26
  -1   2 -13   48.44    3.09
   1  -2  14   15.85    2.12
  -1   2 -14   15.66    1.85
  -1  -2 -14   14.59    1.67
  -1  -2 -14   13.98    1.61
  -1   2 -14   16.38    1.81
  -1  -2 -14   16.04    2.02
   1   2  14   18.11    2.97
  -1   2 -14   19.17    2.15
  -1   2 -14   15.79    1.96
   1  -2  15  816.62   18.68
  -1   2 -15  792.42   17.73
   1   2  15  841.21   21.00
  -1   2 -15  752.87   17.77
  -1   2 -15  797.17   17.22
  -1  -2 -15  820.04   18.11
  -1   2 -15  792.58   17.59
  -1   2 -16   -0.07    0.80
   1   2  16    1.03    1.32
  -1  -2 -16    0.82    1.10
   1  -2  16    0.70    1.04
   1  -2  16    0.53    0.90
  -1   2 -16   -0.08    0.92
  -1  -2 -16    0.25    0.68
  -1  -2 -17   96.70    4.34
   1  -2  17   85.04    4.10
  -1   2 -17   88.27    3.93
   1  -2  17   83.63    4.59
  -1   2 -17   85.31    3.89
   1   2  17   85.46    4.91
  -1   2 -18  138.51    4.57
   1   2  18  150.51    5.86
   1  -2  18  129.11    5.02
  -1   2 -18  134.97    4.53
  -1  -2 -18  143.83    5.07
   1  -2  18  127.93    4.61
   1   2  19  165.18    5.46
  -1  -2 -19  159.04    4.90
  -1  -3  19  110.95    3.93
   1  -3 -19  112.76    3.85
   1   3 -19  116.19    4.01
  -1   3  19  121.33    4.74
  -1   3  18   85.14    4.47
  -1  -3  18   85.23    3.90
   1   3 -18   82.83    3.76
   1  -3 -18   85.23    3.71
   1  -3 -17  107.41    4.45
  -1  -3  17  110.25    4.88
   1  -3 -17  104.32    4.44
   1   3 -17  101.29    4.54
   1  -3 -16  143.61    5.50
   1  -3 -16  132.46    5.35
  -1  -3  16  125.90    5.47
   1   3 -16  134.32    5.92
   1   3 -16  151.27    5.89
  -1  -3  16  130.97    5.86
   1  -3 -16  141.25    5.52
   1   3 -15   57.95    3.75
   1  -3 -15   57.79    3.49
   1  -3 -15   54.52    3.34
   1  -3 -15   56.06    3.44
  -1  -3  15   50.91    3.58
   1   3 -15   55.96    3.79
  -1  -3  15   62.18    4.01
   1  -3 -14  386.88   10.54
   1  -3 -14  402.65   10.74
  -1  -3  14  412.99   11.73
  -1  -3  14  410.00   11.86
   1  -3 -14  396.81   10.79
   1   3 -14  398.19   11.44
   1  -3 -13  129.46    5.17
  -1  -3  13  128.49    6.00
  -1  -3  13  135.84    5.92
   1  -3 -13  130.43    5.29
   1  -3 -13  133.34    5.31
   1  -3 -12    3.86    1.04
   1  -3 -12    3.02    0.94
  -1  -3  12    3.02    1.22
   1  -3 -12    3.18    1.06
  -1  -3  12    1.93    1.11
   1  -3 -12    3.75    0.82
   1   3 -11   46.42    2.98
   1  -3 -11   43.38    2.69
   1  -3 -11   45.40    2.70
   1  -3 -11   45.22    2.29
  -1  -3  11   41.34    3.21
   1  -3 -11   42.30    2.65
  -1   3  11   46.45    3.98
  -1  -3  11   43.64    3.09
   1  -3 -10  298.84    7.89
   1  -3 -10  302.64    7.90
  -1  -3  10  300.32    8.68
   1   3 -10  308.29    8.57
  -1   3  10  282.79    9.05
   1   3 -10  309.79    8.54
  -1  -3  10  285.95    9.08
   1   3 -10  311.39    7.34
   1  -3 -10  304.98    7.15
   1   3 -10  297.54    7.24
   1   3 -10  296.71    8.21
  -1  -3   9  381.56   10.43
   1   3  -9  391.13    9.73
   1   3  -9  415.00    9.02
   1   3  -9  397.67    9.72
  -1  -3   9  366.04    9.74
  -1   3   9  362.93   10.33
   1  -3  -9  380.72    9.17
  -1  -3   9  387.67    9.96
   1   3  -9  407.99    9.60
   1   3  -9  426.31    9.08
   1  -3  -9  369.36    9.17
   1  -3  -9  389.99    8.42
   1  -3  -9  379.94    9.11
   1   3  -8 2347.54   40.29
  -1   3   8 2172.66   41.76
   1  -3  -8 2355.90   40.49
   1   3  -8 2348.79   40.29
   1  -3  -8 2275.98   40.28
   1  -3  -8 2301.91   40.36
  -1  -3   8 2329.50   41.25
   1   3  -8 2288.77   40.67
   1   3  -8 2367.22   40.98
   1  -3  -8 2303.97   40.62
  -1  -3   8 2241.36   41.87
   1   3  -8 2277.72   40.97
  -1  -3   8 2304.36   41.09
   1   3  -7   21.37    1.71
   1   3  -7   19.08    1.61
   1  -3  -7   18.66    1.49
  -1   3   7   21.98    1.92
   1  -3  -7   19.38    1.42
   1  -3  -7   19.22    1.54
   1   3  -7   19.53    1.57
  -1  -3   7   25.03    1.79
   1  -3  -7   22.01    1.53
  -1  -3   7   18.33    1.59
   1   3  -6 3545.29   59.06
   1   3  -6 3517.23   59.31
   1  -3  -6 3512.75   58.90
   1   3  -6 3419.49   58.76
   1  -3  -6 3499.74   58.62
  -1  -3   6 3421.94   59.89
   1   3  -6 3435.78   59.07
  -1  -3   6 3525.33   59.19
   1  -3  -6 3480.35   59.09
  -1   3   6 3355.37   59.91
  -1  -3   5 2058.31   35.18
   1   3  -5 2024.90   35.06
   1   3  -5 2007.85   35.28
   1  -3  -5 1988.45   35.29
   1   3  -4   72.62    2.64
  -1  -3   4   68.06    2.51
   1  -3  -4   70.46    2.73
   1   3  -4   68.74    2.48
  -1   3   3   16.35    1.22
   1   3  -3   14.59    1.05
  -1   3   2  183.65    4.47
   1   3  -2  185.13    4.39
   1   3  -2  171.58    4.15
   1  -3  -2  175.80    4.43
  -1  -3   1 1550.92   26.82
   1   3  -1 1548.24   26.68
  -1   3   1 1548.58   27.08
   1  -3  -1 1591.62   27.17
   1   3  -1 1595.52   26.92
  -1   3   0  362.11    7.40
   1   3   0  354.82    7.01
   1  -3   0  356.51    7.32
  -1  -3   0  362.04    7.00
   1   3   0  342.62    6.83
  -1   3   0  347.42    7.25
  -1   3  -1 3065.74   51.44
   1   3   2 2632.70   44.37
   1  -3   2 2711.52   45.05
  -1   3  -2 2676.69   45.03
  -1  -3  -2 2653.42   44.77
   1  -3   3   67.18    2.42
  -1  -3  -3   65.34    2.06
  -1  -3  -3   65.82    2.02
  -1  -3  -3   68.17    2.18
  -1  -3  -4   74.90    2.31
  -1  -3  -4   83.74    2.46
   1  -3   4   79.66    2.78
  -1  -3  -4   78.94    2.33
  -1   3  -4   80.86    2.84
  -1   3  -5  780.24   15.25
  -1  -3  -5  814.61   14.54
  -1  -3  -5  805.55   14.53
  -1  -3  -5  781.88   14.94
  -1  -3  -5  803.36   14.51
   1  -3   5  808.79   15.29
  -1   3  -5  820.95   15.51
  -1   3  -6 2174.25   37.57
  -1  -3  -6 2112.71   36.62
   1  -3   6 2181.88   37.48
  -1  -3  -6 2100.44   37.24
  -1   3  -6 2154.18   37.23
  -1  -3  -6 2157.71   36.59
  -1  -3  -6 2126.96   37.15
  -1  -3  -6 2170.71   36.51
  -1   3  -6 2138.02   37.72
  -1  -3  -6 2138.07   37.13
  -1   3  -6 2204.10   37.69
  -1  -3  -7 1144.09   21.53
  -1   3  -7 1167.63   21.90
  -1  -3  -7 1153.23   20.95
  -1  -3  -7 1190.20   20.93
  -1  -3  -7 1177.84   20.77
   1  -3   7 1153.48   21.81
  -1  -3  -7 1176.66   21.50
  -1   3  -7 1179.35   22.14
  -1   3  -7 1205.25   22.15
  -1   3  -7 1144.65   21.98
  -1   3  -7 1162.56   21.59
  -1   3  -8  818.86   15.55
  -1   3  -8  830.43   15.57
  -1   3  -8  819.06   16.32
  -1  -3  -8  828.06   16.19
  -1  -3  -8  819.28   15.72
  -1  -3  -8  839.18   16.39
  -1   3  -8  824.49   16.79
   1  -3   8  819.77   16.81
  -1  -3  -8  833.17   15.45
  -1   3  -8  854.68   16.92
  -1  -3  -8  819.26   15.66
   1  -3   8  837.52   16.65
  -1   3  -8  817.99   16.58
  -1  -3  -8  850.66   15.68
  -1   3  -9  383.28    9.24
  -1   3  -9  387.90    9.54
  -1  -3  -9  398.39    8.77
  -1  -3  -9  403.05    8.70
  -1  -3  -9  375.74    8.57
  -1  -3  -9  376.15    8.34
  -1  -3  -9  399.35    9.36
  -1  -3  -9  395.02    9.06
  -1   3  -9  409.32    9.87
  -1  -3  -9  390.05    9.50
   1  -3   9  390.97    9.84
   1  -3   9  379.48    9.49
  -1   3 -10  970.03   19.70
  -1   3 -10 1003.68   20.22
  -1  -3 -10  954.93   19.75
  -1   3 -10  951.02   19.41
  -1  -3 -10  969.68   18.78
  -1  -3 -10  996.46   19.71
  -1  -3 -10  981.76   18.70
   1  -3  10  988.97   20.28
  -1  -3 -11    0.80    0.62
  -1   3 -11    0.47    0.85
   1  -3  11    2.92    1.01
  -1   3 -11    0.14    0.65
  -1  -3 -11    0.41    0.55
  -1   3 -11    1.30    0.85
  -1  -3 -11    0.98    0.88
   1  -3  12  433.85   11.60
  -1   3 -12  442.57   11.59
  -1   3 -12  441.59   11.04
  -1   3 -12  427.88   11.05
  -1  -3 -12  460.56   11.45
  -1  -3 -12  419.07   10.32
  -1  -3 -12  436.83   11.40
  -1  -3 -12  433.91   10.29
  -1  -3 -13  109.16    4.97
  -1  -3 -13   98.71    4.11
   1  -3  13  106.42    4.97
  -1   3 -13  101.84    4.90
  -1   3 -13   96.93    4.48
  -1  -3 -13  100.08    4.07
  -1   3 -13  110.80    5.03
  -1   3 -13   96.31    4.45
  -1  -3 -14 1020.52   20.88
  -1   3 -14 1056.08   22.74
  -1   3 -14 1045.16   21.91
  -1   3 -14 1065.82   22.01
   1  -3  14 1077.67   22.57
   1   3  14 1034.95   26.12
  -1   3 -14 1125.23   22.75
  -1  -3 -14 1086.39   22.67
  -1   3 -15  222.15    7.42
  -1  -3 -15  215.71    7.42
   1  -3  15  208.25    7.17
   1   3  15  217.45    9.37
  -1   3 -15  201.70    7.29
   1  -3  15  211.23    8.63
  -1   3 -15  203.94    6.81
  -1   3 -15  210.91    6.94
   1  -3  16  108.05    4.65
  -1  -3 -16  115.27    5.01
  -1   3 -16  106.83    4.49
   1  -3  16  111.11    5.72
  -1   3 -16  113.20    4.91
  -1  -3 -16  103.30    4.21
   1   3  16  120.25    6.31
  -1   3 -17   12.81    1.65
  -1  -3 -17   11.43    1.61
  -1   3 -17   13.70    1.44
   1  -3  17   12.20    1.80
   1   3  17   12.37    2.07
  -1   3 -18  254.51    6.87
   1   3  18  271.72    8.26
  -1  -3 -18  266.12    7.28
   1   3  19  128.13    4.67
  -1  -3 -19  138.05    4.32
   1  -4 -19   10.12    1.10
   1   4 -19    8.09    1.11
   1   4 -18  117.44    4.44
  -1  -4  18  103.55    3.93
   1  -4 -18  115.17    4.25
   1   4 -17    0.22    0.96
  -1  -4  17    1.15    0.77
   1  -4 -17    0.58    0.69
   1  -4 -17    1.43    0.91
  -1  -4  17    1.02    0.67
  -1   4  16 1238.60   27.41
   1   4 -16 1227.72   25.99
   1  -4 -16 1285.28   24.73
  -1  -4  16 1272.43   25.35
   1  -4 -16 1300.07   25.24
   1  -4 -15   49.94    3.15
  -1  -4  15   50.25    3.56
   1  -4 -15   46.82    3.04
  -1  -4  15   52.58    3.51
   1   4 -15   52.28    3.68
  -1   4  15   56.05    4.44
   1  -4 -15   47.56    3.22
   1  -4 -14 1073.73   22.01
  -1   4  14 1096.51   25.45
   1  -4 -14 1018.98   21.77
  -1  -4  14 1073.91   22.87
  -1  -4  14 1072.47   23.45
   1  -4 -14 1077.69   22.30
   1   4 -14 1039.25   22.60
   1  -4 -13  198.52    6.70
   1  -4 -13  197.83    6.86
   1   4 -13  190.57    7.07
  -1  -4  13  197.99    7.70
   1  -4 -13  190.91    6.55
  -1   4  13  198.42    8.86
  -1  -4  13  203.39    7.25
   1  -4 -12  225.66    7.22
   1   4 -12  221.61    7.49
   1   4 -12  210.28    7.58
  -1  -4  12  215.43    8.04
  -1   4  12  207.87    9.02
  -1  -4  12  219.38    7.53
   1  -4 -12  218.72    6.89
   1  -4 -12  216.69    6.94
   1  -4 -11  947.25   19.06
   1  -4 -11  908.90   18.74
   1   4 -11  897.25   17.78
  -1  -4  11  894.63   20.54
   1   4 -11  905.35   19.83
  -1  -4  11  885.23   19.54
   1   4 -11  874.36   17.74
   1   4 -10    2.64    0.82
   1   4 -10    1.45    1.01
   1  -4 -10    1.12    0.81
  -1  -4  10    0.84    0.87
   1  -4 -10    0.97    0.70
   1   4 -10    3.42    0.88
   1   4 -10    0.62    0.92
   1   4  -9  527.18   11.67
   1  -4  -9  522.83   11.90
   1  -4  -9  528.32   11.84
   1   4  -9  545.01   11.74
   1   4  -9  532.47   12.47
  -1  -4   9  526.39   13.29
  -1  -4   9  539.34   12.41
   1  -4  -9  497.59   12.20
   1  -4  -9  517.25   11.78
   1   4  -9  533.03   12.16
   1   4  -8   39.48    2.39
   1  -4  -8   38.47    2.31
  -1  -4   8   36.32    2.37
   1  -4  -8   45.84    2.65
   1   4  -8   36.32    2.18
   1  -4  -8   38.98    2.28
   1   4  -8   39.94    2.55
   1   4  -8   38.32    2.33
   1   4  -8   40.31    2.37
  -1  -4   8   36.67    2.46
   1  -4  -8   38.31    2.20
  -1  -4   8   37.31    2.74
  -1  -4   7 1279.63   24.21
   1  -4  -7 1287.39   24.03
   1  -4  -7 1306.12   23.91
   1  -4  -7 1283.36   24.29
   1  -4  -7 1261.79   24.35
  -1  -4   7 1341.77   24.59
  -1  -4   7 1293.87   25.32
   1   4  -7 1299.86   24.23
   1   4  -7 1314.42   24.29
   1   4  -7 1254.18   23.96
   1  -4  -7 1239.23   23.50
   1   4  -7 1356.60   24.51
   1   4  -6 6639.89  112.10
  -1  -4   6 6906.02  113.05
  -1  -4   6 6733.20  111.80
  -1  -4   6 6811.99  112.17
   1   4  -6 6827.63  112.46
   1  -4  -6 6846.94  111.60
   1   4  -6 6511.76  111.61
   1   4  -6 6599.14  112.07
   1  -4  -6 6661.22  112.17
   1  -4  -6 6716.00  111.07
   1  -4  -6 6664.86  112.12
   1   4  -5 1092.79   21.01
   1  -4  -5 1093.78   20.84
   1   4  -5 1125.67   20.77
  -1  -4   5 1127.65   20.81
   1   4  -5 1136.71   21.06
   1  -4  -5 1097.32   21.05
   1   4  -5 1087.35   20.29
   1  -4  -5 1109.72   20.85
   1   4  -5 1121.76   21.01
   1  -4  -4 1648.88   29.30
   1   4  -4 1641.87   29.50
   1   4  -4 1657.50   29.55
   1   4  -4 1636.24   29.40
   1  -4  -4 1594.16   29.60
   1   4  -4 1662.37   29.11
   1   4  -3  584.51   11.91
   1  -4  -3  585.03   12.39
  -1   4   3  586.44   11.95
   1   4  -3  594.33   11.70
   1   4  -2   17.49    1.21
  -1   4   2   17.35    1.37
  -1  -4   2   15.06    1.18
   1   4  -2   15.74    1.23
   1   4  -1 1860.65   31.96
  -1   4   1 1852.46   32.37
   1  -4  -1 1839.16   32.40
  -1  -4   1 1874.15   32.13
   1   4  -1 1861.00   32.20
   1   4   0 4731.53   78.18
  -1   4   0 4664.54   78.66
   1   4   1 1017.08   18.32
  -1  -4  -1 1041.48   18.46
  -1   4  -1 1049.20   19.01
   1  -4   1 1028.89   18.98
  -1   4  -1 1021.81   19.05
   1   4   1 1018.67   18.49
   1  -4   2 2244.61   37.84
  -1   4  -2 2208.75   37.81
  -1  -4  -2 2159.40   37.10
   1   4   2 2176.32   37.09
  -1   4  -2 2121.76   37.88
  -1  -4  -3 4998.17   83.50
   1  -4   3 5038.15   83.84
   1   4   3 5024.49   83.17
  -1   4  -3 4989.08   83.87
  -1   4  -4 3842.21   66.06
  -1   4  -4 3956.52   66.61
  -1   4  -4 4010.87   66.18
  -1   4  -4 3988.57   66.19
  -1  -4  -4 3866.13   65.77
  -1  -4  -4 3894.61   65.79
  -1  -4  -4 3950.08   65.62
  -1   4  -4 3880.36   66.67
   1  -4   4 3971.93   66.47
  -1  -4  -5 1696.48   30.11
  -1  -4  -5 1730.82   29.78
  -1  -4  -5 1726.00   30.17
  -1   4  -5 1654.62   30.47
  -1   4  -5 1697.74   30.91
  -1   4  -5 1726.94   30.41
   1  -4   5 1730.10   30.71
  -1   4  -5 1749.41   31.00
  -1  -4  -5 1697.96   29.76
  -1  -4  -5 1745.97   29.91
  -1  -4  -5 1710.81   30.14
  -1   4  -5 1738.14   30.43
  -1   4  -5 1689.97   30.26
  -1   4  -6 6451.15  105.37
  -1  -4  -6 6304.11  104.54
  -1  -4  -6 6450.26  104.61
   1  -4   6 6276.80  105.10
  -1  -4  -6 6324.88  103.95
  -1  -4  -6 6271.04  104.45
  -1   4  -6 6272.34  105.38
  -1   4  -6 6115.07  104.94
  -1   4  -6 6230.43  104.55
  -1  -4  -6 6158.50  103.94
  -1  -4  -6 6281.98  103.94
  -1   4  -6 6276.56  104.61
  -1   4  -6 6300.34  104.56
  -1   4  -7  550.92   11.90
  -1   4  -7  568.59   11.75
  -1  -4  -7  562.05   11.82
  -1   4  -7  562.17   12.48
  -1  -4  -7  577.41   11.24
  -1  -4  -7  546.04   11.26
  -1   4  -7  579.10   11.82
  -1  -4  -7  567.54   11.29
   1  -4   7  552.85   12.33
  -1  -4  -7  561.85   11.91
  -1   4  -7  581.06   12.44
  -1  -4  -7  575.77   12.00
  -1   4  -8 1605.66   28.92
  -1   4  -8 1653.84   28.97
  -1   4  -8 1610.39   30.04
  -1   4  -8 1561.02   29.88
  -1  -4  -8 1596.70   28.37
  -1  -4  -8 1622.67   28.56
  -1   4  -8 1600.23   29.43
  -1  -4  -8 1628.72   29.54
   1  -4   8 1616.83   29.96
  -1   4  -8 1654.97   30.28
  -1  -4  -8 1619.38   29.45
  -1  -4  -8 1554.49   28.51
  -1  -4  -8 1616.62   29.20
  -1   4  -9 1487.44   27.65
  -1  -4  -9 1564.23   28.65
  -1  -4  -9 1510.83   27.61
   1  -4   9 1511.35   28.48
  -1   4  -9 1509.61   27.66
  -1  -4  -9 1565.30   27.62
  -1   4  -9 1533.98   29.19
  -1   4  -9 1568.17   29.49
  -1   4  -9 1522.12   28.56
  -1  -4  -9 1512.06   28.20
  -1   4 -10 1434.96   26.04
  -1  -4 -10 1418.48   26.37
  -1   4 -10 1435.80   26.00
  -1   4 -10 1444.69   27.32
  -1  -4 -10 1443.46   26.30
  -1   4 -10 1461.54   28.32
  -1   4 -10 1434.45   27.85
   1  -4  10 1405.78   27.30
  -1   4 -10 1489.07   28.17
  -1  -4 -10 1433.73   27.45
  -1  -4 -11  229.52    7.19
  -1   4 -11  220.60    7.16
  -1   4 -11  219.48    7.28
  -1   4 -11  224.03    7.53
  -1  -4 -11  212.77    6.07
  -1  -4 -11  220.51    7.12
  -1   4 -11  223.63    6.86
   1  -4  11  208.21    6.77
  -1  -4 -11  207.37    6.11
  -1   4 -12   86.94    4.11
  -1  -4 -12   95.81    4.56
   1  -4  12   91.45    4.24
  -1  -4 -12   92.81    3.72
  -1  -4 -12   90.04    3.76
  -1   4 -12  103.84    4.93
  -1  -4 -12   92.77    4.50
  -1   4 -12   91.85    4.47
   1  -4  13   59.59    4.57
  -1  -4 -13   58.48    2.99
   1  -4  13   62.73    3.52
  -1   4 -13   60.59    3.43
  -1   4 -13   63.89    3.71
  -1   4 -13   61.27    3.87
  -1  -4 -13   72.50    4.01
  -1  -4 -14  281.57    8.82
  -1   4 -14  277.57    8.14
   1  -4  14  264.06    8.01
  -1   4 -14  267.49    8.85
   1   4  14  291.94   11.47
  -1   4 -14  276.75    8.42
   1  -4  14  285.81   10.34
  -1  -4 -15   40.73    3.06
   1   4  15   38.66    3.99
  -1   4 -15   34.42    2.58
  -1   4 -15   35.97    2.90
  -1   4 -15   40.60    3.05
   1  -4  15   38.64    3.54
  -1   4 -15   39.43    2.64
  -1  -4 -16  119.81    5.07
   1  -4  16  104.48    5.39
  -1   4 -16  114.83    5.01
   1   4  16  115.82    6.26
   1   4  17    5.19    1.52
  -1   4 -17    4.56    1.15
  -1  -4 -17    3.53    1.16
   1  -4  17    5.72    1.34
   1   4  18   47.74    3.08
  -1  -4 -18   50.13    2.70
  -1   4 -18   49.47    2.58
   1  -4  18   45.83    2.68
  -1   5  18  233.59    7.20
   1  -5 -18  241.03    6.51
  -1  -5  17  121.25    4.47
   1  -5 -17  126.55    4.72
  -1   5  17  121.57    5.40
   1  -5 -16   33.10    2.28
  -1  -5  16   30.75    2.53
  -1   5  16   33.45    3.17
  -1  -5  16   30.59    2.29
   1  -5 -16   32.86    2.57
   1   5 -16   33.67    2.75
  -1  -5  15 2575.45   48.05
   1   5 -15 2661.24   47.81
  -1  -5  15 2552.12   46.84
   1  -5 -15 2666.71   47.43
   1  -5 -15 2666.21   46.67
  -1   5  15 2648.41   50.17
   1  -5 -14   43.35    3.05
   1   5 -14   44.84    3.31
  -1  -5  14   40.25    2.96
   1  -5 -14   40.55    2.80
   1  -5 -14   41.11    2.77
  -1   5  14   42.26    3.98
  -1  -5  14   38.87    3.31
  -1   5  13 1026.43   24.92
   1  -5 -13 1062.57   21.97
   1  -5 -13  980.04   20.98
  -1  -5  13 1034.20   23.09
   1   5 -13 1070.17   22.19
   1   5 -13 1007.50   22.67
   1  -5 -13 1050.44   21.25
  -1  -5  13  985.24   21.50
   1   5 -12   10.77    1.84
   1  -5 -12   12.98    1.61
   1   5 -12   10.87    1.86
  -1   5  12    8.31    2.15
   1   5 -12   10.00    1.23
  -1  -5  12   13.84    2.10
   1  -5 -12   10.94    1.73
   1  -5 -12   11.06    1.58
  -1  -5  12   11.11    1.68
   1   5 -12   10.24    1.26
   1   5 -11   28.34    2.67
  -1  -5  11   29.54    2.45
  -1  -5  11   26.18    2.70
   1   5 -11   29.69    2.14
   1   5 -11   27.70    2.07
   1   5 -11   29.77    2.59
   1  -5 -11   31.04    2.52
   1  -5 -10    9.16    1.39
   1   5 -10    8.03    1.23
   1   5 -10    8.95    1.54
   1   5 -10    8.63    1.55
   1   5 -10    9.10    1.28
  -1  -5  10    8.33    1.36
   1  -5 -10   10.02    1.38
  -1  -5  10    8.01    1.66
   1   5  -9   32.23    2.23
   1  -5  -9   19.76    1.82
   1   5  -9   31.72    2.22
  -1  -5   9   18.09    1.80
  -1  -5   9   21.54    2.29
   1  -5  -9   18.39    1.74
   1  -5  -9   20.91    1.94
   1   5  -9   22.62    2.22
   1   5  -9   21.36    2.03
   1   5  -8   19.33    1.81
   1  -5  -8   20.54    1.80
   1  -5  -8   20.01    1.87
   1   5  -8   21.88    1.94
  -1  -5   8   24.44    2.33
   1  -5  -8   19.97    1.66
   1  -5  -8   24.58    1.95
  -1  -5   8   20.53    1.82
   1   5  -8   23.03    1.97
   1   5  -8   20.43    2.02
  -1  -5   7   61.99    3.26
   1  -5  -7   66.68    3.18
  -1  -5   7   61.98    2.98
   1  -5  -7   61.28    3.17
   1   5  -7   63.78    3.32
   1   5  -7   69.70    3.36
   1   5  -7   63.35    3.04
   1   5  -7   64.19    3.23
   1  -5  -6 1860.84   34.23
   1   5  -6 1870.23   33.58
   1   5  -6 1897.25   34.32
   1  -5  -6 1833.97   32.94
  -1  -5   6 1887.79   34.33
  -1  -5   6 1854.55   33.54
   1  -5  -6 1915.87   34.15
   1   5  -6 1930.86   34.38
   1   5  -6 1922.75   34.34
   1  -5  -5 1234.21   23.50
   1   5  -5 1208.55   22.70
  -1  -5   5 1213.03   22.78
   1   5  -5 1254.98   23.47
   1   5  -5 1270.02   23.73
   1   5  -5 1299.51   23.81
   1  -5  -5 1288.69   23.67
   1  -5  -5 1216.36   22.21
   1  -5  -5 1227.15   23.89
   1   5  -4    6.75    0.90
  -1  -5   4    7.59    0.93
  -1  -5   4    6.34    1.17
  -1   5   4    8.23    1.19
   1  -5  -4    9.61    1.34
   1   5  -4    7.70    1.17
   1  -5  -4    7.14    1.10
   1   5  -4    6.83    1.08
   1   5  -3 2464.36   43.69
  -1  -5   3 2546.99   43.91
  -1   5   3 2454.63   43.64
   1   5  -3 2544.29   43.89
   1  -5  -3 2535.36   43.72
  -1  -5   3 2415.32   43.39
   1  -5  -3 2525.53   44.49
   1   5  -3 2525.26   43.37
  -1   5   3 2440.07   43.63
   1   5  -3 2553.91   43.90
   1   5  -2  161.78    4.59
  -1  -5   2  154.03    4.62
   1   5  -2  158.50    4.92
  -1   5   2  159.64    4.36
  -1   5   2  153.59    4.32
   1   5  -2  158.16    4.92
   1  -5  -2  152.35    5.25
  -1   5   2  152.26    4.73
   1   5  -2  155.27    4.76
  -1   5   2  153.73    4.78
  -1  -5   2  158.88    4.83
  -1   5   1   77.09    3.13
  -1   5   1   82.91    3.22
   1   5  -1   79.64    3.10
   1   5  -1   78.25    2.90
  -1   5   1   84.34    3.63
   1   5  -1   81.17    3.21
  -1   5   1   77.53    2.90
  -1  -5   1   78.20    3.09
  -1  -5   1   77.50    2.98
  -1   5   1   77.29    2.89
   1   5  -1   81.10    3.22
  -1   5   0  276.66    6.62
   1   5   0  268.12    6.75
   1   5   0  269.17    6.62
  -1   5   0  282.27    6.93
  -1  -5   0  273.51    6.56
   1   5   0  269.62    6.41
   1   5   0  262.29    6.71
  -1   5   0  269.61    7.04
   1  -5   0  276.80    6.94
  -1   5   0  274.07    6.59
  -1  -5   0  281.49    6.71
  -1   5  -1 1482.42   26.81
   1   5   1 1488.21   26.44
  -1  -5  -1 1470.78   26.56
  -1   5  -1 1545.91   27.21
  -1   5  -1 1497.23   27.38
   1   5   1 1472.03   26.70
  -1  -5  -1 1470.78   26.64
  -1   5  -1 1501.03   26.88
   1  -5   1 1515.75   27.20
  -1  -5  -2  127.71    3.86
  -1   5  -2  120.54    4.24
   1  -5   2  117.25    4.09
  -1  -5  -2  118.46    3.62
  -1  -5  -2  123.09    4.23
  -1  -5  -2  122.25    3.77
   1   5   2  123.64    3.74
   1  -5   2  120.21    4.20
  -1   5  -2  127.30    4.10
  -1   5  -2  126.74    4.26
  -1   5  -2  130.23    4.11
   1  -5   3 1390.80   25.08
   1   5   3 1370.40   24.31
  -1   5  -3 1402.59   25.14
  -1  -5  -3 1351.69   24.80
   1  -5   3 1345.39   25.42
  -1   5  -3 1331.60   24.18
  -1  -5  -3 1331.90   24.26
  -1   5  -3 1358.64   24.59
  -1   5  -3 1300.68   25.23
  -1  -5  -3 1314.93   24.14
  -1  -5  -3 1326.14   24.11
   1  -5   4  580.26   13.29
  -1  -5  -4  571.91   11.78
  -1  -5  -4  573.31   11.67
   1  -5   4  593.50   12.58
  -1  -5  -4  581.22   12.09
  -1  -5  -4  582.58   11.87
  -1   5  -4  592.83   12.36
  -1   5  -4  584.19   12.09
  -1   5  -4  593.61   12.68
  -1  -5  -4  578.97   11.82
  -1   5  -4  569.00   11.98
  -1   5  -4  610.94   12.41
  -1  -5  -4  578.42   11.70
  -1   5  -5  770.56   15.36
  -1   5  -5  776.52   15.30
  -1  -5  -5  769.79   15.06
  -1   5  -5  771.32   15.51
  -1  -5  -5  755.20   15.04
   1  -5   5  770.77   16.90
  -1   5  -5  743.16   16.14
  -1  -5  -5  772.07   14.84
  -1  -5  -5  771.92   15.01
  -1  -5  -5  762.56   15.05
   1  -5   5  770.64   15.83
  -1   5  -5  788.42   15.52
  -1   5  -5  786.09   15.99
  -1  -5  -5  740.71   14.75
  -1  -5  -6  924.07   17.66
  -1   5  -6  921.51   18.13
  -1  -5  -6  939.50   18.07
  -1   5  -6  916.78   19.11
  -1   5  -6  900.88   18.31
  -1   5  -6  967.38   18.39
  -1  -5  -6  878.70   17.45
  -1   5  -6  959.63   18.35
   1  -5   6  926.80   18.74
   1  -5   6  965.22   20.22
  -1  -5  -6  949.43   17.59
  -1  -5  -6  952.62   18.07
  -1  -5  -6  918.53   17.92
  -1  -5  -7  169.43    5.12
   1  -5   7  150.84    5.38
  -1  -5  -7  150.04    4.52
  -1   5  -7  162.70    5.10
  -1  -5  -7  148.17    4.48
   1  -5   7  159.77    6.42
  -1  -5  -7  165.29    5.12
  -1   5  -7  160.21    5.35
  -1  -5  -7  150.09    4.84
  -1   5  -7  157.54    5.06
  -1   5  -7  161.21    5.70
  -1   5  -7  160.32    5.07
  -1  -5  -7  158.06    4.55
  -1   5  -8    5.49    1.17
  -1  -5  -8    1.46    0.80
  -1   5  -8    2.22    0.81
  -1  -5  -8    1.64    0.55
  -1  -5  -8    1.35    0.64
   1  -5   8    2.59    1.23
  -1   5  -8    1.28    0.70
  -1  -5  -8    1.82    0.76
  -1   5  -8    2.64    0.98
  -1   5  -8    1.65    0.72
  -1   5  -9  290.88    8.78
  -1   5  -9  297.61    8.04
  -1   5  -9  300.03    8.62
  -1  -5  -9  299.03    7.80
  -1   5  -9  301.04    7.75
  -1  -5  -9  303.91    8.20
  -1  -5  -9  296.49    7.27
  -1   5  -9  296.69    7.72
   1  -5   9  306.83   10.17
  -1  -5  -9  302.69    8.30
  -1   5  -9  287.73    8.72
  -1  -5 -10    0.22    0.98
  -1  -5 -10    4.23    0.82
  -1  -5 -10    2.02    1.04
   1  -5  10    0.61    1.12
  -1   5 -10    0.75    0.83
  -1   5 -10    3.75    1.21
  -1   5 -10    0.59    0.73
  -1  -5 -10    2.88    0.73
  -1  -5 -10    0.92    0.66
  -1   5 -10    0.97    0.97
  -1   5 -10    1.36    0.70
  -1   5 -11 3199.11   54.70
  -1   5 -11 3038.20   53.41
  -1  -5 -11 3201.37   54.14
  -1   5 -11 2932.25   51.91
  -1   5 -11 3001.82   54.50
  -1  -5 -11 2944.64   52.16
  -1  -5 -11 2935.04   52.03
  -1   5 -11 3120.84   55.06
  -1   5 -11 2958.60   51.93
  -1  -5 -12   27.97    2.55
  -1   5 -12   31.83    2.85
  -1   5 -12   26.75    2.66
  -1   5 -12   29.58    2.61
  -1   5 -12   30.48    2.37
  -1   5 -13 5499.89   96.60
   1  -5  13 5590.00   98.84
  -1   5 -13 5744.79   96.28
  -1   5 -13 5542.62   94.68
  -1   5 -13 5410.78   95.65
   1  -5  14  150.17    7.06
  -1   5 -14  146.00    6.26
  -1  -5 -14  161.27    6.25
   1  -5  15  118.42    5.93
  -1  -5 -15  123.58    5.30
  -1  -5 -16   18.63    2.01
   1   5  16   17.14    2.51
   1  -5  16   19.17    2.29
  -1   5 -17  470.72   11.05
  -1  -5 -17  482.69   11.21
   1  -5  17  448.96   11.50
   1   5  17  473.32   12.46
  -1  -5 -18   33.34    2.07
   1  -5  18   28.58    1.91
   1   5  18   34.74    2.42
  -1   5 -18   34.46    2.03
  -1   6  18   30.68    2.03
   1  -6 -18   31.61    1.88
   1   6 -18   30.05    1.92
   1  -6 -17   20.20    1.79
  -1  -6  17   18.45    1.58
  -1   6  17   20.08    2.01
   1   6 -17   17.75    1.78
   1  -6 -16  101.69    4.35
  -1  -6  16  100.54    4.33
   1  -6 -16   87.68    3.46
  -1   6  16  101.88    4.95
   1   6 -16   99.79    4.44
   1   6 -15   55.64    3.46
  -1  -6  15   54.91    3.49
   1  -6 -15   50.76    2.84
  -1   6  15   55.41    3.98
   1  -6 -15   58.33    3.44
   1   6 -14  845.79   18.81
  -1  -6  14  848.60   19.27
   1  -6 -14  790.76   17.48
  -1  -6  14  813.13   17.56
  -1   6  14  875.17   20.95
   1  -6 -14  881.68   18.70
   1  -6 -14  858.32   17.78
   1   6 -14  834.33   19.56
  -1  -6  13   38.56    2.70
   1  -6 -13   38.76    2.71
  -1   6  13   36.50    3.69
   1  -6 -13   37.55    2.60
   1   6 -13   38.95    3.24
  -1  -6  13   37.26    3.21
   1   6 -13   38.11    3.06
   1  -6 -13   43.25    3.15
   1  -6 -12   23.31    2.07
   1   6 -12   25.40    2.69
  -1   6  12   24.33    3.14
   1   6 -12   25.13    2.01
   1  -6 -12   27.41    2.56
  -1  -6  12   28.35    2.35
   1   6 -12   25.03    2.49
   1   6 -12   24.11    1.96
  -1  -6  12   26.16    2.82
  -1  -6  11   37.89    2.72
   1   6 -11   44.05    2.72
   1   6 -11   42.51    2.69
   1   6 -11   36.83    2.90
   1   6 -11   40.02    3.25
   1  -6 -11   46.33    3.15
  -1  -6  11   40.07    3.37
   1  -6 -11   42.14    2.78
  -1  -6  10  314.71   10.07
   1  -6 -10  327.84    9.03
   1   6 -10  322.61    9.81
   1   6 -10  302.48    8.62
   1   6 -10  315.43    8.69
   1   6 -10  316.30    9.12
   1  -6 -10  315.49    8.72
  -1  -6  10  293.37    8.54
   1   6  -9  149.18    5.57
   1   6  -9  151.79    5.56
   1  -6  -9  153.28    5.47
  -1  -6   9  146.85    6.29
   1   6  -9  149.96    6.11
  -1  -6   9  149.85    5.34
   1   6  -9  152.44    5.58
   1  -6  -9  143.42    5.20
   1  -6  -8   91.16    3.76
   1   6  -8   91.71    4.48
   1   6  -8   93.82    4.09
   1  -6  -8   96.02    4.12
   1   6  -8   94.61    4.25
  -1  -6   8   90.05    3.87
   1   6  -8   86.35    4.12
   1  -6  -7 1463.26   27.12
  -1  -6   7 1447.24   27.56
   1  -6  -7 1487.42   28.28
   1   6  -7 1466.03   27.79
   1   6  -7 1508.93   28.61
   1   6  -7 1527.45   28.88
   1   6  -7 1509.96   28.58
   1  -6  -6 1669.79   32.61
  -1  -6   6 1837.85   33.45
  -1  -6   6 1734.85   31.61
   1   6  -6 1827.80   32.96
   1   6  -6 1717.82   31.75
   1   6  -6 1768.19   32.85
   1  -6  -6 1834.28   32.11
   1   6  -6 1744.47   32.79
   1  -6  -6 1688.70   31.07
   1  -6  -5 1273.23   23.07
   1   6  -5 1337.39   24.82
   1  -6  -5 1341.29   24.95
   1  -6  -5 1234.93   24.67
  -1  -6   5 1258.61   23.69
  -1  -6   5 1300.68   25.18
   1   6  -5 1225.51   23.52
   1   6  -4 1797.09   32.40
  -1  -6   4 1740.57   31.14
   1   6  -4 1788.08   32.37
  -1   6   4 1771.24   32.39
  -1   6   4 1729.51   30.86
  -1   6   4 1726.29   32.31
  -1   6   4 1737.20   30.89
  -1  -6   4 1746.98   32.13
  -1  -6   4 1780.52   32.56
   1  -6  -4 1722.21   32.26
   1  -6  -4 1705.25   30.50
   1   6  -4 1703.69   30.80
   1   6  -4 1814.58   32.19
  -1  -6   3  386.20    8.70
   1   6  -3  406.50    9.73
   1  -6  -3  378.71    8.39
   1   6  -3  400.25    9.69
  -1   6   3  394.60    8.85
   1   6  -3  395.58    9.42
   1  -6  -3  386.30    9.60
  -1   6   3  386.88    8.78
  -1  -6   3  402.99    9.54
  -1   6   3  392.81    9.69
  -1   6   3  385.50    9.65
  -1  -6   3  404.94    9.75
  -1   6   2   12.27    1.25
   1  -6  -2   11.61    1.38
   1   6  -2   12.86    1.51
  -1  -6   2   11.64    1.13
   1  -6  -2   10.45    1.03
  -1   6   2   14.11    1.54
  -1  -6   2   11.76    1.38
   1   6  -2   13.69    1.40
  -1   6   2   12.66    1.28
  -1   6   2   10.49    1.33
   1   6  -2   13.00    1.51
  -1  -6   2   12.71    1.38
  -1  -6   1 4567.94   76.95
   1   6  -1 4662.90   78.14
   1   6  -1 4702.52   77.70
  -1   6   1 4599.22   77.56
   1   6  -1 4609.85   78.10
  -1   6   1 4617.57   78.29
   1  -6  -1 4466.31   77.13
  -1  -6   1 4592.57   77.98
  -1  -6   1 4585.32   77.85
   1  -6  -1 4469.12   78.22
   1   6  -1 4585.49   78.08
  -1   6   1 4567.77   77.57
  -1   6   1 4781.61   78.35
  -1  -6   0  367.55    8.78
  -1  -6   0  369.81    8.21
  -1   6   0  380.83    9.21
  -1   6   0  370.19    8.76
   1   6   0  376.98    8.93
   1   6   0  374.54    8.93
   1   6   0  368.70    8.62
  -1  -6   0  362.43    8.78
   1   6   0  371.28    8.93
  -1   6   0  394.60    9.88
   1  -6   0  364.61    8.56
  -1   6   0  374.00    8.78
  -1  -6  -1  170.64    4.73
   1   6   1  171.37    5.01
  -1   6  -1  169.54    5.23
   1  -6   1  169.33    5.48
   1   6   1  163.59    5.12
  -1   6  -1  170.80    5.49
   1   6   1  169.54    5.01
   1   6   1  173.95    5.19
  -1   6  -1  178.93    5.75
  -1  -6  -1  168.29    5.04
  -1  -6  -1  170.60    5.08
  -1   6  -1  177.89    5.28
   1  -6   1  165.84    5.16
  -1   6  -1  167.62    4.51
   1   6   1  165.88    5.09
   1  -6   2   90.14    3.76
  -1  -6  -2   92.38    3.96
  -1  -6  -2   86.42    3.38
  -1  -6  -2   85.51    3.36
  -1   6  -2   93.82    3.84
   1   6   2   91.31    3.44
  -1   6  -2   91.93    3.65
  -1   6  -2   93.28    3.87
   1   6   2   90.34    3.38
  -1   6  -2   89.36    3.13
  -1  -6  -2   87.35    3.18
  -1   6  -2   91.68    3.62
   1   6   2   91.65    3.43
  -1  -6  -2   84.08    2.94
   1  -6   2   87.35    3.74
   1   6   2   84.79    3.31
   1   6   3 1676.05   30.56
   1   6   3 1746.83   31.07
  -1   6  -3 1721.66   30.70
  -1   6  -3 1809.52   32.04
  -1   6  -3 1759.20   31.49
  -1   6  -3 1762.37   31.56
  -1  -6  -3 1690.62   30.89
   1   6   3 1714.40   30.61
   1   6   3 1748.50   31.04
  -1   6  -3 1757.76   31.46
   1  -6   3 1708.75   32.10
  -1  -6  -3 1688.97   31.70
  -1  -6  -3 1685.17   30.86
   1  -6   3 1714.78   31.83
  -1  -6  -3 1713.36   30.61
  -1  -6  -3 1699.51   30.44
  -1  -6  -4 1908.18   33.85
  -1  -6  -4 1894.69   34.57
   1  -6   4 1966.11   35.78
  -1  -6  -4 1929.40   34.16
  -1   6  -4 1980.42   35.33
  -1   6  -4 1924.05   34.54
  -1  -6  -4 1853.63   33.95
  -1  -6  -4 1910.21   34.10
   1  -6   4 1896.57   35.12
  -1   6  -4 1851.88   34.00
  -1  -6  -4 1939.63   33.77
  -1   6  -5  932.56   19.06
  -1  -6  -5  902.23   18.06
  -1  -6  -5  938.72   17.78
  -1   6  -5  937.45   18.52
  -1  -6  -5  870.62   17.58
  -1  -6  -5  933.20   17.84
  -1  -6  -5  930.06   17.74
  -1  -6  -5  898.22   17.82
  -1   6  -5  880.07   18.03
  -1   6  -5  892.55   18.15
   1  -6   5  913.57   19.64
   1  -6   5  879.94   18.75
  -1   6  -5  931.59   18.51
  -1   6  -6   76.85    3.39
  -1   6  -6   75.57    3.52
  -1   6  -6   75.49    3.52
  -1  -6  -6   78.11    3.28
  -1  -6  -6   71.01    2.98
  -1   6  -6   72.11    3.77
  -1  -6  -6   71.23    3.18
  -1  -6  -6   72.57    3.21
  -1   6  -6   63.77    3.68
   1  -6   6   71.83    4.12
  -1   6  -6   76.69    3.48
  -1  -6  -6   67.69    2.96
  -1   6  -7   12.58    1.54
   1  -6   7   11.18    1.90
  -1  -6  -7   11.73    1.34
  -1   6  -7   10.30    1.43
  -1   6  -7   12.41    1.43
  -1   6  -7   10.44    1.64
  -1  -6  -7   12.19    1.42
  -1  -6  -7   12.28    1.42
  -1   6  -7   13.96    1.60
  -1  -6  -7   10.51    1.17
  -1  -6  -8  287.88    7.79
  -1  -6  -8  285.49    7.88
   1  -6   8  274.65    9.39
  -1   6  -8  271.57    7.71
  -1  -6  -8  274.30    7.51
  -1   6  -8  266.89    7.64
  -1   6  -8  278.41    8.13
  -1   6  -8  283.16    7.81
  -1  -6  -8  274.41    7.02
  -1   6  -9  174.00    5.85
  -1  -6  -9  171.98    5.62
  -1   6  -9  179.36    5.86
   1  -6   9  176.78    7.45
  -1  -6  -9  167.06    5.09
  -1  -6  -9  185.21    6.17
  -1  -6  -9  176.08    5.98
  -1   6  -9  177.83    6.38
  -1   6  -9  170.86    5.75
  -1  -6 -10  746.35   15.81
  -1   6 -10  713.65   17.45
  -1   6 -10  749.29   15.92
   1  -6  10  775.76   19.27
  -1  -6 -10  812.72   17.04
  -1  -6 -10  773.79   16.72
  -1   6 -10  742.61   16.26
  -1   6 -10  723.57   16.98
  -1  -6 -11  110.27    4.92
  -1   6 -11   95.06    3.90
  -1  -6 -11  107.97    4.78
  -1   6 -11  105.22    4.41
   1  -6  11  104.88    5.94
  -1   6 -11  102.37    4.92
  -1   6 -11   92.81    4.76
  -1   6 -11   97.75    3.95
  -1   6 -11   99.35    5.12
  -1  -6 -12  369.10   10.33
  -1   6 -12  374.21   10.64
  -1   6 -12  362.21   10.99
  -1  -6 -12  361.58   10.32
  -1   6 -13  133.44    6.01
  -1   6 -13  135.82    5.83
   1  -6  14    0.57    1.33
  -1   6 -14    0.10    0.85
   1   6  14    2.62    1.81
  -1   6 -14    1.63    1.20
   1  -6  15    7.19    1.60
  -1   6 -15    7.42    1.45
  -1   6 -16  146.31    5.30
   1  -6  16  147.66    5.77
  -1  -6 -17    1.21    0.74
   1  -6  17    3.23    0.90
   1  -7 -17    0.88    0.63
   1   7 -17    0.05    0.70
  -1   7  17    0.30    0.53
  -1  -7  17    0.84    0.50
   1  -7 -16   26.07    2.05
  -1   7  16   25.47    2.18
  -1  -7  16   23.93    1.93
   1   7 -16   26.12    2.09
  -1   7  15   11.78    1.78
   1  -7 -15   11.40    1.56
   1   7 -15   12.64    1.70
  -1  -7  15   12.20    1.66
   1  -7 -14  375.32   10.02
  -1   7  14  370.33   11.22
  -1  -7  14  357.19   10.27
   1   7 -14  377.25   10.15
   1   7 -13   57.40    3.57
   1   7 -13   48.83    2.58
  -1   7  13   60.23    4.31
   1  -7 -13   59.82    3.61
   1  -7 -13   53.84    3.03
  -1  -7  13   55.47    3.78
   1   7 -13   50.84    3.70
  -1   7  12   96.26    5.76
   1   7 -12  102.03    4.87
   1   7 -12   97.20    4.12
   1  -7 -12   98.55    4.30
   1   7 -12  104.62    5.36
  -1  -7  12  103.79    5.33
   1   7 -12   99.64    4.16
   1   7 -11   16.16    2.01
   1   7 -11   16.11    2.21
  -1   7  11   15.53    2.55
   1  -7 -11   13.60    1.65
  -1  -7  11   14.84    2.13
   1   7 -11   16.66    1.80
   1   7 -11   15.31    1.74
   1   7 -10    5.27    1.29
   1   7 -10    3.65    1.15
   1   7 -10    3.21    1.28
   1   7 -10    4.04    1.31
   1  -7  -9  158.91    5.80
   1   7  -9  163.74    6.05
  -1  -7   9  155.31    5.42
   1   7  -9  162.58    6.63
   1   7  -9  166.18    6.07
   1  -7  -9  164.28    5.57
   1   7  -9  157.02    5.91
   1   7  -8   90.02    4.36
   1   7  -8   94.14    4.45
  -1  -7   8   89.44    3.83
   1  -7  -8   88.52    3.77
   1   7  -8   89.01    4.12
   1  -7  -8  101.04    4.37
   1  -7  -8   92.25    4.26
   1   7  -8   88.75    4.63
   1  -7  -7   18.63    1.62
   1  -7  -7   18.64    1.92
   1   7  -7   20.62    1.89
   1   7  -7   19.98    2.14
  -1  -7   7   16.11    2.12
   1  -7  -7   20.57    1.97
  -1  -7   7   18.44    1.67
   1   7  -7   16.71    1.99
   1   7  -7   20.47    2.19
  -1  -7   6  279.59    8.71
  -1  -7   6  276.76    7.34
   1  -7  -6  288.98    7.85
   1  -7  -6  274.36    6.98
   1   7  -6  270.11    7.43
   1   7  -6  291.86    8.61
  -1  -7   5  112.53    4.04
   1  -7  -5  119.58    4.97
  -1   7   5  115.18    3.89
  -1   7   5  112.73    3.87
   1   7  -5  127.96    5.06
  -1  -7   5  119.07    5.06
   1   7  -5  118.69    4.14
   1   7  -4  650.35   14.45
   1   7  -4  634.82   14.38
  -1  -7   4  632.71   14.54
  -1  -7   4  626.48   13.01
  -1   7   4  628.72   14.48
   1  -7  -4  604.19   12.72
  -1   7   4  625.56   13.09
   1   7  -4  660.83   14.45
  -1   7   4  632.08   13.10
  -1  -7   3  147.16    5.36
   1  -7  -3  134.20    4.32
  -1   7   3  142.18    5.42
  -1   7   3  146.17    4.71
   1   7  -3  138.16    5.24
   1   7  -3  148.98    5.27
   1   7  -3  151.25    5.44
  -1   7   3  142.78    5.39
  -1  -7   3  140.31    4.46
   1   7  -2  690.99   14.55
   1  -7  -2  642.79   13.48
  -1   7   2  663.04   14.95
  -1  -7   2  692.06   14.75
   1  -7  -2  633.80   14.83
  -1  -7   2  642.48   14.55
  -1   7   2  691.03   15.10
   1   7  -2  689.57   14.76
  -1   7   2  663.37   14.02
   1   7  -2  669.11   14.70
  -1   7   2  668.17   14.01
  -1  -7   2  654.82   13.43
  -1  -7   1  935.51   18.70
  -1  -7   1  890.10   18.65
   1   7  -1  936.79   18.83
  -1   7   1  903.33   19.10
  -1   7   1  933.69   18.35
  -1   7   1  946.53   18.40
  -1  -7   1  907.25   17.56
   1   7  -1  936.63   18.62
   1  -7  -1  885.34   19.09
   1   7  -1  922.78   18.76
   1  -7  -1  897.74   17.88
  -1   7   1  933.10   19.23
   1  -7   0    5.49    1.15
   1   7   0    3.55    0.92
  -1   7   0    4.60    1.04
  -1  -7   0    4.04    1.02
   1   7   0    3.55    1.00
  -1  -7   0    3.68    0.90
  -1   7   0    3.02    1.03
   1   7   0    4.20    0.96
  -1  -7   0    7.38    0.99
   1  -7   0    8.68    1.14
  -1   7   0    3.68    1.13
  -1   7   0    5.68    1.10
   1   7   0    2.99    0.98
   1   7   1  655.68   13.88
  -1   7  -1  665.45   14.11
   1  -7   1  643.40   13.91
  -1   7  -1  664.04   14.07
   1   7   1  641.58   13.81
   1   7   1  627.59   13.81
  -1  -7  -1  633.12   13.09
  -1   7  -1  663.90   15.18
  -1  -7  -1  642.28   13.86
  -1   7  -1  670.28   14.69
  -1  -7  -1  597.36   13.77
  -1  -7  -1  636.58   12.60
   1   7   1  649.92   13.84
  -1   7  -2  554.68   12.58
  -1  -7  -2  554.23   11.32
   1   7   2  556.63   12.32
  -1   7  -2  563.07   13.09
   1  -7   2  559.81   12.69
   1   7   2  565.68   12.35
   1   7   2  539.91   11.99
  -1   7  -2  543.84   11.47
  -1   7  -2  562.98   12.59
   1   7   2  535.65   11.96
  -1  -7  -2  521.17   12.17
  -1   7  -2  568.26   13.27
  -1  -7  -2  536.99   12.13
  -1  -7  -2  537.65   11.61
   1   7   3   53.24    2.67
  -1   7  -3   59.26    3.17
  -1   7  -3   57.24    3.33
  -1  -7  -3   55.76    2.56
   1   7   3   60.76    3.06
  -1   7  -3   57.67    3.26
   1  -7   3   60.46    3.33
  -1  -7  -3   55.98    2.88
  -1  -7  -3   53.94    2.85
  -1  -7  -3   54.57    2.63
  -1   7  -3   54.38    2.64
   1   7   3   57.79    3.01
  -1   7  -3   57.31    3.11
   1   7   3   57.07    2.75
  -1   7  -4 2868.59   48.59
  -1   7  -4 2821.49   49.16
  -1   7  -4 2671.17   47.29
   1  -7   4 2727.74   49.16
  -1  -7  -4 2548.06   47.34
  -1  -7  -4 2729.56   47.03
  -1  -7  -4 2702.03   47.17
  -1  -7  -4 2706.06   47.60
  -1  -7  -4 2635.96   47.45
  -1  -7  -5  862.40   17.25
  -1   7  -5  889.61   18.91
  -1   7  -5  851.48   18.03
  -1   7  -5  860.17   17.98
  -1  -7  -5  873.53   17.13
  -1   7  -5  842.52   17.39
  -1   7  -5  860.15   18.10
   1  -7   5  868.16   19.17
  -1  -7  -5  793.46   17.06
  -1  -7  -5  843.44   17.34
  -1  -7  -5  854.80   17.17
  -1   7  -6  206.33    6.55
  -1   7  -6  208.99    7.37
  -1  -7  -6  215.43    6.40
  -1   7  -6  208.08    6.66
   1  -7   6  214.91    7.72
  -1  -7  -6  218.88    6.38
  -1  -7  -6  213.83    6.33
  -1  -7  -6  211.86    6.11
  -1   7  -6  216.87    6.96
  -1   7  -6  214.71    6.91
  -1   7  -7    3.92    1.12
   1  -7   7    4.86    1.43
  -1  -7  -7    3.65    0.97
  -1  -7  -7    3.35    0.99
  -1   7  -7    5.85    1.45
  -1   7  -7    5.03    1.09
  -1   7  -7    3.98    1.14
  -1  -7  -7    4.38    1.06
  -1  -7  -7    3.95    0.85
  -1   7  -7    4.73    1.22
  -1   7  -8 1067.11   22.16
   1  -7   8 1124.00   24.19
  -1   7  -8 1056.86   21.61
  -1  -7  -8 1059.93   21.32
  -1   7  -8 1067.49   21.95
  -1   7  -8 1094.59   22.05
  -1  -7  -8 1034.25   20.53
  -1  -7  -8 1103.57   21.70
  -1  -7  -8 1117.60   21.95
  -1   7  -8 1106.56   23.42
  -1  -7  -9  184.01    5.93
  -1   7  -9  183.01    6.29
  -1   7  -9  176.84    6.17
   1  -7   9  187.62    7.77
  -1  -7  -9  187.13    6.43
  -1  -7  -9  183.91    6.27
  -1   7  -9  186.90    6.69
  -1  -7 -10  593.69   13.92
  -1   7 -10  582.93   13.45
  -1   7 -10  589.86   13.53
  -1   7 -10  609.32   14.52
  -1  -7 -10  613.72   14.22
   1  -7  10  587.42   16.00
  -1  -7 -10  556.95   12.91
  -1   7 -11   24.01    2.48
  -1   7 -11   24.19    2.02
   1  -7  11   26.66    3.16
  -1   7 -11   26.13    2.09
  -1  -7 -11   23.97    2.35
  -1  -7 -11   27.45    2.49
  -1   7 -11   24.57    2.62
  -1   7 -12   35.95    3.12
  -1  -7 -12   39.62    2.93
   1  -7  12   35.18    3.40
  -1   7 -12   37.76    2.26
  -1   7 -12   35.36    2.20
  -1   7 -12   36.88    2.94
  -1  -7 -12   39.41    2.90
  -1   7 -13  205.19    7.20
  -1   7 -13  197.76    7.56
  -1  -7 -14  454.20   11.23
  -1   7 -14  426.38   11.18
   1   7  14  412.94   13.24
  -1  -7 -15  104.06    4.31
   1   7  15   98.59    5.27
  -1   7 -15  103.11    4.40
   1  -7  15  101.55    4.74
   1   7  16    7.85    1.45
  -1  -7 -16    9.73    1.28
  -1   7 -16    8.22    1.22
   1  -7  16    7.80    1.26
   1   8 -16    1.93    0.71
  -1  -8  16    0.95    0.57
  -1   8  15   54.71    2.95
   1   8 -15   59.08    3.03
  -1   8  14   87.79    4.29
   1   8 -14   95.71    4.21
  -1  -8  14   98.52    4.47
   1   8 -13  259.58    6.86
  -1   8  13  276.37    8.91
   1  -8 -13  269.62    7.26
   1   8 -13  272.03    6.99
   1   8 -13  282.22    8.26
  -1   8  12   21.86    2.52
   1   8 -12   20.54    2.14
  -1  -8  12   20.02    2.35
   1   8 -12   20.87    2.38
   1   8 -12   24.46    2.01
   1  -8 -12   21.22    1.88
   1   8 -12   22.50    1.95
   1   8 -11  250.98    7.91
  -1   8  11  253.90    9.21
   1   8 -11  254.25    7.61
   1   8 -11  255.89    7.64
   1  -8 -11  245.53    7.41
   1   8 -11  248.54    8.80
   1   8 -10    1.97    1.00
   1   8 -10    2.26    1.09
   1   8 -10    3.43    1.28
   1  -8 -10    3.68    1.24
  -1   8  10    3.22    1.37
   1   8 -10    2.78    1.04
   1  -8 -10    2.26    0.89
   1   8  -9   61.64    4.08
   1  -8  -9   65.47    3.61
   1   8  -9   68.22    3.65
   1   8  -9   66.81    3.82
   1  -8  -9   70.81    3.84
   1   8  -9   70.79    3.91
   1   8  -8   47.13    2.92
   1  -8  -8   47.79    3.11
   1   8  -8   45.74    3.18
   1  -8  -8   47.55    3.11
   1   8  -8   49.64    3.57
  -1  -8   8   47.83    3.58
   1   8  -8   48.36    3.25
  -1  -8   7   50.50    3.56
   1   8  -7   49.61    3.48
   1  -8  -7   49.42    3.07
   1  -8  -7   46.13    3.08
   1   8  -7   44.27    3.24
   1   8  -7   41.29    2.65
   1   8  -7   44.03    3.19
   1   8  -6   33.63    2.83
   1   8  -6   34.04    2.27
  -1  -8   6   36.14    2.98
   1  -8  -6   35.96    2.77
   1  -8  -6   37.95    2.62
  -1   8   5   55.97    2.79
   1  -8  -5   54.95    3.51
   1   8  -5   62.17    3.71
  -1   8   5   59.21    2.82
   1   8  -5   63.50    3.71
  -1  -8   5   61.45    3.79
   1  -8  -5   61.52    3.25
   1   8  -5   65.40    3.74
   1   8  -4  142.33    5.65
  -1   8   4  131.71    4.70
   1   8  -4  179.08    6.26
  -1   8   4  130.22    4.66
   1   8  -4  171.87    6.14
  -1  -8   4  141.53    5.72
   1  -8  -4  124.00    4.39
  -1   8   3  544.88   13.58
   1   8  -3  563.88   13.32
   1   8  -3  558.78   13.33
  -1   8   3  545.18   12.30
  -1   8   3  537.30   13.54
   1   8  -3  553.61   13.28
  -1   8   3  541.79   12.31
  -1  -8   3  562.78   13.44
   1  -8  -3  524.37   11.78
  -1   8   2   63.35    3.22
  -1  -8   2   60.04    3.46
   1   8  -2   75.83    3.81
  -1   8   2   64.05    3.72
  -1   8   2   65.20    3.75
   1  -8  -2   56.09    2.86
  -1   8   2   59.57    3.16
   1   8  -2   76.11    3.82
   1   8  -2   63.51    3.47
   1   8  -1 1917.06   35.37
  -1   8   1 1918.18   36.12
  -1  -8   1 1873.52   33.73
  -1  -8   1 1878.78   35.23
  -1   8   1 1905.29   34.92
   1   8  -1 1924.51   35.34
  -1   8   1 1917.51   36.14
   1  -8  -1 1830.67   34.27
   1   8  -1 1906.85   35.33
  -1   8   1 1902.47   34.96
  -1   8   0 1116.77   22.29
  -1   8   0 1119.07   23.18
  -1  -8   0 1086.76   21.04
   1  -8   0 1091.03   21.81
   1   8   0 1130.36   22.42
  -1   8   0 1123.11   23.24
  -1  -8   0 1103.95   22.31
   1   8   0 1126.16   22.39
  -1   8   0 1120.27   22.31
   1   8   0 1131.99   22.41
   1   8   0 1118.53   22.46
   1   8   1  930.78   19.36
  -1  -8  -1  900.98   17.56
  -1   8  -1  977.68   20.32
  -1   8  -1  957.75   19.50
  -1  -8  -1  930.47   19.19
  -1   8  -1  945.47   19.44
   1   8   1  937.26   19.17
  -1  -8  -1  911.05   18.11
   1   8   1  927.27   19.10
   1  -8   1  942.75   19.24
   1   8   1  942.05   19.39
  -1   8  -1  932.78   20.26
  -1   8  -2    1.39    0.98
  -1  -8  -2    2.23    0.74
   1  -8   2    0.43    0.73
  -1  -8  -2    1.88    0.65
   1   8   2    1.05    0.78
   1   8   2    2.02    0.87
  -1   8  -2    1.41    1.03
  -1   8  -2    0.66    0.92
   1   8   2    1.40    0.81
  -1  -8  -2    2.65    0.90
   1   8   2    2.02    0.84
  -1   8  -3   58.68    3.61
  -1  -8  -3   57.96    3.12
   1  -8   3   56.66    3.41
   1   8   3   56.88    2.92
  -1  -8  -3   54.61    2.70
   1   8   3   57.32    2.95
  -1   8  -3   55.21    2.78
  -1   8  -3   55.65    3.34
  -1  -8  -3   55.31    2.78
  -1   8  -3   60.49    3.48
  -1   8  -3   56.67    3.62
  -1  -8  -4  161.11    5.24
   1  -8   4  156.36    6.16
  -1   8  -4  159.67    5.95
  -1   8  -4  173.41    6.61
  -1  -8  -4  161.10    5.58
   1   8   4  159.13    5.09
   1   8   4  157.69    5.08
  -1  -8  -4  165.48    5.68
  -1   8  -4  156.32    5.22
  -1  -8  -4  169.09    5.21
  -1   8  -4  159.95    6.19
  -1   8  -4  170.36    6.10
  -1   8  -5   38.59    2.55
   1  -8   5   48.14    3.36
  -1  -8  -5   42.70    2.59
  -1  -8  -5   40.52    2.47
  -1  -8  -5   40.86    2.63
  -1  -8  -5   43.05    2.57
  -1   8  -5   39.88    2.91
  -1   8  -5   44.33    3.28
  -1  -8  -6  362.56    9.43
  -1   8  -6  375.29   10.95
  -1  -8  -6  376.94    9.37
  -1  -8  -6  345.09    8.93
  -1  -8  -6  354.93    9.20
  -1   8  -6  378.39   10.30
  -1   8  -6  344.30    9.38
  -1   8  -6  377.63   10.29
   1  -8   6  366.57   10.87
   1  -8   7   26.94    2.79
  -1   8  -7   29.93    2.80
  -1  -8  -7   22.55    1.79
  -1   8  -7   23.67    2.17
  -1  -8  -7   23.87    2.05
  -1   8  -7   24.50    2.34
  -1  -8  -7   24.04    2.09
  -1  -8  -7   24.12    2.06
  -1   8  -7   24.86    2.32
   1  -8   8   49.74    3.79
  -1   8  -8   51.04    3.72
  -1  -8  -8   47.17    2.98
  -1  -8  -8   42.25    2.68
  -1   8  -8   50.60    3.23
  -1   8  -8   46.85    3.13
  -1  -8  -8   45.60    2.89
  -1   8  -8   42.76    2.98
  -1   8  -9  224.10    7.53
  -1   8  -9  232.30    8.52
  -1  -8  -9  239.41    7.56
  -1  -8  -9  235.74    6.94
  -1   8  -9  238.38    7.51
  -1  -8  -9  249.24    7.51
   1  -8   9  252.23    9.07
  -1  -8 -10  214.58    6.32
  -1  -8 -10  218.38    7.14
  -1   8 -10  215.27    6.86
  -1   8 -10  211.34    6.80
   1  -8  10  213.64    8.32
  -1   8 -10  213.66    7.30
  -1  -8 -10  213.02    7.01
  -1   8 -11  168.31    6.19
  -1  -8 -11  150.72    5.81
  -1   8 -11  148.00    5.28
   1  -8  11  154.33    6.87
  -1  -8 -11  165.75    6.07
  -1   8 -11  151.46    5.33
  -1   8 -12  177.76    5.50
   1  -8  12  209.04    7.74
  -1   8 -12  188.84    5.59
  -1  -8 -12  207.29    6.72
  -1   8 -12  197.52    6.79
  -1  -8 -13   13.69    1.69
   1  -8  13   12.62    1.90
   1   8  13   14.88    2.41
  -1   8 -13   14.61    1.82
  -1  -8 -14   60.38    3.09
  -1   8 -14   53.97    3.09
   1   8  14   51.70    3.75
  -1   8 -15  165.04    5.29
  -1  -8 -15  169.88    5.20
   1   8  15  160.26    5.96
   1  -8  16  109.42    3.82
  -1   8 -16  108.66    3.68
  -1  -8 -16  106.00    3.54
  -1  -9  15    3.41    0.77
   1   9 -15    3.34    0.74
   1  -9 -15    3.29    0.79
   1  -9 -14    1.92    0.80
  -1  -9  14    1.41    0.77
   1   9 -14    1.81    0.76
   1   9 -13    1.68    0.59
   1  -9 -13    1.56    0.86
  -1  -9  13    3.24    1.08
   1   9 -13    0.62    0.79
   1   9 -13    2.07    0.62
   1  -9 -12  213.34    6.77
   1   9 -12  213.60    6.16
  -1   9  12  186.07    6.41
   1   9 -12  213.89    6.12
   1  -9 -12  194.00    5.69
   1   9 -12  217.08    6.53
   1   9 -11  631.59   14.19
   1   9 -11  658.07   14.31
   1   9 -11  634.52   14.21
   1  -9 -11  677.70   14.82
   1   9 -10   56.38    3.33
   1   9 -10   55.81    3.83
   1  -9 -10   50.62    2.96
   1   9 -10   56.12    3.34
  -1   9  10   47.37    3.35
   1  -9 -10   56.92    3.38
   1   9 -10   51.31    3.05
  -1  -9   9  248.58    8.51
   1  -9  -9  240.97    7.60
   1   9  -9  245.59    7.22
   1   9  -9  232.79    8.39
   1  -9  -9  220.36    7.15
   1   9  -9  233.96    7.76
   1   9  -9  239.25    7.78
   1  -9  -8   98.86    4.50
   1   9  -8   89.57    4.00
   1  -9  -8   88.77    4.29
   1   9  -8   93.84    4.66
   1   9  -8   93.71    5.02
  -1  -9   8   98.11    5.08
   1   9  -8   92.59    4.63
   1  -9  -7    3.83    1.11
   1  -9  -7    1.73    0.97
   1   9  -7    2.27    1.21
  -1  -9   7    1.79    1.29
   1  -9  -6  121.85    4.96
   1  -9  -6  119.60    5.35
   1   9  -6  125.66    5.74
  -1  -9   6  122.65    5.68
   1   9  -5    4.30    1.43
   1  -9  -5    4.03    1.25
  -1  -9   5    3.98    1.42
   1  -9  -5    4.14    1.11
   1   9  -5    3.58    1.23
   1   9  -5    6.32    1.60
   1  -9  -4  156.15    6.54
   1   9  -4  172.68    6.56
   1   9  -4  178.81    6.73
   1   9  -4  167.35    6.53
  -1   9   4  171.91    5.64
  -1  -9   4  177.10    6.69
  -1   9   4  172.99    5.67
   1  -9  -4  169.37    5.84
   1  -9  -3  218.43    6.42
   1   9  -3  228.05    7.70
   1   9  -3  234.19    7.68
  -1   9   3  223.04    6.87
  -1   9   3  214.14    7.85
  -1  -9   3  227.98    7.66
  -1   9   3  216.24    6.80
   1   9  -3  223.21    7.50
  -1   9   2   21.09    2.32
   1   9  -2   21.48    2.23
  -1   9   2   22.87    2.07
   1   9  -2   25.11    2.38
  -1  -9   2   19.52    2.13
   1   9  -2   21.72    2.25
   1  -9  -2   19.30    1.77
   1   9  -2   20.94    2.23
  -1   9   2   20.99    2.30
  -1   9   2   23.80    2.12
  -1  -9   1  694.96   15.97
   1   9  -1  709.11   16.23
  -1   9   1  729.13   17.04
   1   9  -1  709.23   16.08
   1   9  -1  688.70   16.09
   1   9  -1  698.31   16.05
   1  -9  -1  690.83   15.17
  -1   9   1  698.57   15.66
  -1   9   1  732.90   17.07
   1  -9   0  256.30    7.65
  -1   9   0  270.89    8.13
   1   9   0  265.74    8.11
  -1  -9   0  263.02    8.13
   1   9   0  277.89    8.39
   1   9   0  266.21    8.08
  -1   9   0  273.95    8.92
  -1   9   0  277.73    9.01
   1   9   0  276.26    8.39
  -1   9   0  277.11    8.24
   1   9   1   20.43    2.11
   1  -9   1   20.99    2.00
  -1   9  -1   18.68    2.24
  -1   9  -1   18.91    2.28
   1   9   1   20.21    2.00
   1   9   1   23.39    2.23
   1   9   1   18.78    1.97
  -1  -9  -1   23.66    2.17
  -1   9  -1   23.80    2.30
  -1   9  -1   20.75    2.14
  -1   9  -2  304.03    9.53
  -1  -9  -2  289.12    8.37
   1   9   2  298.81    8.79
  -1  -9  -2  280.64    7.13
  -1   9  -2  298.07    9.49
   1   9   2  290.07    8.19
   1   9   2  287.94    8.18
   1   9   2  302.39    8.76
   1  -9   2  292.59    8.59
  -1  -9  -2  284.66    7.44
  -1   9  -2  283.93    8.71
  -1   9  -2  294.58    8.83
  -1   9  -3  116.43    5.19
  -1   9  -3  122.18    5.69
  -1  -9  -3  113.04    4.06
  -1  -9  -3  105.48    4.68
   1   9   3  118.63    4.53
  -1  -9  -3  110.87    4.15
   1  -9   3  109.32    4.95
  -1   9  -3  120.85    5.28
  -1  -9  -3  119.26    4.81
   1   9   3  111.30    4.42
   1  -9   4  287.10    8.87
  -1  -9  -4  271.58    7.97
  -1   9  -4  286.42    8.77
  -1  -9  -4  274.98    7.33
  -1  -9  -4  275.93    8.07
  -1   9  -4  278.73    8.67
  -1  -9  -4  272.14    7.43
  -1   9  -4  285.67    9.38
  -1  -9  -5  244.50    6.93
  -1   9  -5  244.93    8.64
  -1  -9  -5  241.51    6.92
  -1  -9  -5  240.13    7.34
  -1   9  -5  239.01    7.03
   1  -9   5  255.86    8.46
  -1  -9  -5  231.43    7.00
  -1   9  -6    1.20    1.08
   1  -9   6    0.40    1.11
  -1   9  -6    0.34    0.78
  -1  -9  -6    1.41    0.78
  -1  -9  -6    0.50    0.68
  -1  -9  -6    0.14    0.72
  -1   9  -7  197.09    6.97
  -1   9  -7  189.58    7.59
  -1  -9  -7  188.98    6.19
  -1  -9  -7  184.46    6.07
  -1   9  -7  199.72    6.97
   1  -9   7  189.97    7.44
  -1  -9  -7  189.93    6.19
  -1   9  -7  191.55    6.39
  -1   9  -8  565.97   13.53
  -1  -9  -8  553.05   12.87
   1  -9   8  551.12   14.54
  -1   9  -8  549.64   13.49
  -1   9  -8  533.07   12.97
  -1   9  -8  546.87   14.68
  -1  -9  -8  548.77   12.72
  -1  -9  -8  540.17   12.43
   1  -9   9  170.16    7.02
  -1   9  -9  165.60    6.00
  -1   9  -9  150.87    6.73
  -1  -9  -9  162.09    5.70
  -1   9  -9  166.54    6.04
  -1   9  -9  168.89    6.04
  -1  -9  -9  165.97    5.85
  -1   9 -10  779.23   18.63
  -1   9 -10  791.99   16.85
   1  -9  10  807.26   18.68
  -1  -9 -10  776.69   16.75
  -1  -9 -10  810.58   16.98
  -1   9 -10  759.40   17.02
  -1   9 -10  771.63   16.74
  -1   9 -11  152.67    5.68
  -1   9 -11  159.46    5.24
   1  -9  11  156.18    6.45
  -1   9 -11  157.94    5.25
  -1  -9 -11  170.15    5.69
  -1  -9 -12   97.18    3.98
   1  -9  12   95.34    4.63
  -1   9 -12   83.07    3.22
  -1   9 -12   94.43    4.09
   1   9  12   89.30    5.07
  -1   9 -12   83.87    3.24
   1  -9  13    1.89    1.01
  -1  -9 -13    0.22    0.66
   1   9  13    0.71    1.04
  -1   9 -13    0.58    0.75
  -1  -9 -14   71.21    2.95
  -1   9 -14   72.45    3.12
   1  -9  14   69.18    3.38
   1   9  14   68.71    3.44
   1 -10 -13   11.94    1.24
  -1 -10  13   11.63    1.33
   1 -10 -12   83.32    3.47
   1  10 -12   77.16    3.05
   1  10 -12   77.64    3.07
   1 -10 -11  151.34    5.23
   1  10 -11  151.55    5.08
   1  10 -11  155.83    5.16
   1 -10 -10    7.96    1.32
   1  10 -10    6.96    1.27
  -1 -10  10    9.63    1.60
   1  10 -10    7.99    1.34
   1 -10  -9   47.15    2.92
   1  10  -9   43.94    3.00
  -1 -10   9   46.03    3.33
   1  10  -9   43.64    2.98
   1 -10  -8  423.15   10.66
   1  10  -8  421.47   11.99
   1  10  -8  418.48   11.26
   1  10  -8  423.39   11.30
  -1 -10   8  426.45   11.76
   1 -10  -7   25.71    2.29
  -1 -10   7   26.43    2.63
   1 -10  -7   29.06    2.31
   1  10  -7   29.36    2.76
   1  10  -6  364.10   10.49
  -1 -10   6  361.92   10.60
   1 -10  -6  356.42   10.16
   1  10  -6  367.58   10.57
   1  10  -6  364.52   10.88
   1 -10  -6  370.82    9.72
   1  10  -5   31.49    2.85
  -1 -10   5   27.00    2.60
   1 -10  -5   28.66    2.61
   1 -10  -5   26.93    2.25
   1  10  -5   26.88    2.62
   1  10  -5   24.63    2.55
   1 -10  -4  335.51    9.03
   1  10  -4  346.99   10.11
   1  10  -4  353.94   10.22
  -1 -10   4  343.01   10.11
  -1  10   4  330.85    8.78
   1  10  -4  354.56   10.41
  -1  10   4  324.57    8.75
   1 -10  -4  328.57   10.24
   1  10  -4  362.62   10.54
  -1  10   3  178.92    5.99
   1  10  -3  170.68    6.59
   1 -10  -3  162.45    5.65
  -1 -10   3  175.92    6.63
   1  10  -3  166.70    6.65
   1  10  -3  173.25    6.72
   1  10  -3  166.95    6.55
  -1  10   3  168.69    5.87
   1 -10  -3  172.77    6.99
  -1 -10   2 5028.58   85.60
  -1  10   2 4966.16   84.80
   1 -10  -2 4852.25   83.93
   1  10  -2 5007.57   86.03
  -1  10   2 4965.57   84.80
  -1  10   2 4796.56   86.72
   1  10  -2 4967.05   85.65
   1  10  -2 4947.46   86.05
   1  10  -2 4952.62   85.68
   1 -10  -2 4839.11   83.94
  -1  10   1  284.27    8.47
  -1  10   1  284.32    9.44
   1  10  -1  275.43    8.82
   1  10  -1  284.43    8.84
   1  10  -1  277.06    8.64
  -1  10   1  274.53    9.36
  -1  10   1  289.04    8.49
   1 -10  -1  274.04    7.88
  -1 -10   1  276.40    8.58
   1  10  -1  273.71    8.57
  -1  10   0 2799.34   50.39
   1  10   0 2779.48   50.83
   1 -10   0 2707.99   49.53
  -1  10   0 2740.45   51.88
   1  10   0 2811.31   50.78
   1  10   0 2760.75   50.30
  -1 -10   0 2816.82   50.36
   1  10   0 2767.81   50.27
  -1  10   0 2834.67   50.48
  -1  10   0 2785.70   51.84
  -1  10  -1    5.42    1.55
   1 -10   1    3.96    1.06
  -1  10  -1    2.86    1.32
  -1  10  -1    1.91    1.31
  -1  10  -1    3.15    1.31
   1  10   1    4.35    1.20
  -1 -10  -1    4.46    1.23
   1  10   1    3.71    1.19
   1  10   1    4.70    1.18
  -1  10  -2 1239.21   26.36
  -1  10  -2 1246.04   25.10
  -1  10  -2 1239.43   26.41
   1 -10   2 1226.07   24.59
   1  10   2 1225.18   24.11
   1  10   2 1228.52   24.15
  -1 -10  -2 1146.55   24.48
  -1 -10  -2 1214.80   24.47
  -1 -10  -3   60.05    3.40
  -1  10  -3   68.14    4.35
  -1  10  -3   67.35    4.33
  -1 -10  -3   62.66    3.48
   1  10   3   61.50    3.21
  -1  10  -3   64.98    3.82
   1 -10   3   72.53    3.91
  -1  10  -4  858.24   20.02
  -1  10  -4  888.44   20.14
  -1  10  -4  830.42   18.82
  -1 -10  -4  859.27   18.03
   1 -10   4  876.70   18.97
  -1  10  -5  143.41    6.43
  -1 -10  -5  132.05    4.62
  -1 -10  -5  133.26    5.13
  -1  10  -5  144.57    5.95
  -1  10  -5  147.82    6.58
   1 -10   5  143.64    5.97
  -1 -10  -6  634.10   13.83
  -1 -10  -6  647.95   14.36
   1 -10   6  668.32   15.88
  -1  10  -6  663.09   16.61
  -1 -10  -7    1.16    0.76
  -1  10  -7    1.07    1.04
  -1  10  -7    1.30    0.96
  -1  10  -7    0.42    0.91
   1 -10   7    1.12    1.04
  -1 -10  -7    2.04    0.85
  -1 -10  -7    1.75    0.79
  -1  10  -8  156.68    5.81
  -1 -10  -8  145.35    5.06
  -1  10  -8  155.97    5.83
   1 -10   8  159.44    6.36
  -1 -10  -8  148.66    5.03
  -1  10  -8  151.17    5.24
  -1  10  -8  147.50    6.50
  -1  10  -9  200.99    6.46
  -1  10  -9  188.74    6.02
  -1 -10  -9  191.96    5.92
   1 -10   9  200.31    7.14
  -1 -10  -9  191.36    5.80
  -1  10  -9  196.01    6.43
  -1  10 -10  577.05   12.71
   1 -10  10  580.75   13.93
  -1  10 -10  574.51   12.73
  -1  10 -10  551.59   12.51
  -1 -10 -10  561.91   12.36
   1 -10  11   46.25    2.97
   1  10  11   40.35    2.98
  -1 -10 -11   47.41    2.46
  -1  10 -11   48.65    2.59
  -1  10 -11   44.26    2.36
  -1  10 -11   43.24    2.35
  -1 -10 -12  286.45    6.95
   1  10  12  265.73    7.69
   1 -10  12  295.76    8.07
  -1  10 -12  287.75    7.17
   1 -10  13    5.90    1.01
   1  11 -12    3.40    0.82
   1  11 -11  338.44    8.65
   1 -11 -11  323.57    7.60
   1  11 -11  316.36    7.57
  -1 -11  11  335.94    8.33
   1  11 -11  310.63    7.54
   1  11 -10  177.25    5.47
   1  11 -10  183.35    6.16
  -1 -11  10  174.41    5.86
   1 -11 -10  175.52    5.25
   1  11 -10  175.64    5.43
   1  11  -9    3.34    1.14
  -1 -11   9    3.16    1.09
   1  11  -9    4.58    1.07
   1 -11  -9    3.58    0.87
   1  11  -8   13.41    1.71
   1 -11  -8   14.60    1.53
   1  11  -8   13.07    1.78
   1  11  -8   13.90    1.73
  -1 -11   8   12.15    1.77
   1 -11  -7  119.16    4.44
  -1 -11   7  123.64    5.23
   1  11  -7  117.47    5.25
   1  11  -6    3.43    1.22
  -1 -11   6    3.05    1.18
   1 -11  -6    3.32    0.92
   1  11  -6    3.66    1.22
   1  11  -6    3.57    1.17
   1 -11  -5    4.91    1.04
   1  11  -5    7.22    1.53
   1  11  -5    8.97    1.55
   1  11  -5   11.19    1.76
  -1 -11   5    5.25    1.37
   1 -11  -4   41.40    3.04
   1 -11  -4   39.68    2.48
   1  11  -4   42.09    3.09
  -1 -11   4   43.68    3.12
  -1  11   4   39.34    2.41
   1  11  -4   48.58    3.33
   1  11  -4   42.14    3.09
   1  11  -4   41.35    3.11
  -1  11   4   41.64    2.47
   1  11  -3 1013.55   22.13
   1  11  -3 1059.68   22.00
   1  11  -3 1073.98   22.25
   1 -11  -3  992.48   22.25
  -1 -11   3 1048.23   21.87
  -1  11   3 1036.34   20.71
   1  11  -3 1049.98   21.94
  -1  11   3 1040.90   20.70
   1 -11  -3  993.00   20.19
   1  11  -2   32.77    2.72
  -1 -11   2   32.41    2.67
   1  11  -2   35.16    2.83
   1 -11  -2   35.60    3.06
   1  11  -2   33.64    2.75
   1 -11  -2   31.17    2.11
  -1  11   2   32.50    2.45
  -1  11   2   36.58    2.60
  -1  11   1    1.50    0.98
  -1 -11   1    0.80    0.94
   1 -11  -1    1.50    0.68
   1  11  -1    0.94    0.92
   1  11  -1   -0.16    0.99
   1 -11  -1    0.79    0.69
  -1  11   1    0.22    0.88
   1  11  -1    0.08    0.99
   1 -11   0   10.22    1.20
   1  11   0   11.31    1.63
  -1 -11   0   10.33    1.59
  -1  11   0   13.50    1.78
   1 -11   0   11.40    1.45
   1  11   0   11.72    1.65
  -1  11   0    9.11    1.58
  -1  11   0   11.09    1.81
  -1  11   0   11.17    1.94
  -1  11  -1   20.92    2.42
   1  11   1   19.27    1.95
  -1  11  -1   23.06    2.27
   1  11   1   21.90    2.06
  -1  11  -1   21.02    2.48
  -1 -11  -1   18.85    1.99
  -1  11  -1   21.06    2.17
   1 -11   1   21.47    2.00
   1 -11   2   27.11    2.29
  -1  11  -2   32.87    2.70
  -1  11  -2   28.03    2.53
   1  11   2   28.99    2.23
  -1 -11  -2   29.61    2.36
  -1  11  -2   26.96    2.81
  -1  11  -2   25.15    2.69
   1  11   2   30.22    2.29
  -1 -11  -3  332.07    9.06
  -1  11  -3  335.85   10.65
  -1  11  -3  345.87    9.81
   1 -11   3  339.65    9.39
  -1  11  -3  347.92   10.68
  -1  11  -3  335.86    9.75
  -1  11  -4   45.05    3.48
   1 -11   4   46.52    3.04
  -1  11  -4   42.68    3.11
  -1  11  -4   46.17    3.16
  -1  11  -4   45.41    3.49
  -1 -11  -4   40.40    2.63
   1 -11   5   35.96    2.72
  -1  11  -5   37.36    2.83
  -1  11  -5   35.59    2.80
  -1 -11  -5   32.66    2.28
  -1  11  -5   36.82    3.13
   1 -11   6  181.02    6.34
  -1  11  -6  169.37    6.85
  -1 -11  -6  165.61    5.28
  -1  11  -7   56.91    3.32
  -1  11  -7   56.68    3.74
  -1  11  -7   57.86    3.33
   1 -11   7   57.68    3.37
  -1  11  -8   18.67    2.16
  -1  11  -8   16.64    1.77
   1 -11   8   18.05    1.92
  -1  11  -8   16.96    1.79
  -1  11  -9  344.62    9.64
  -1  11  -9  340.04    8.54
  -1  11  -9  332.76    8.51
   1 -11   9  332.75    8.99
   1 -11  10   -0.12    0.64
  -1  11 -10    0.45    0.59
  -1  11 -10    1.07    0.85
  -1  11 -10    0.64    0.59
  -1  11 -11   87.57    3.77
   1 -11  11   79.90    3.38
  -1 -12  10   85.11    3.24
  -1 -12   9    0.35    0.60
   1  12  -9    0.63    0.62
   1  12  -9    0.40    0.62
   1  12  -9    0.67    0.62
   1 -12  -8   25.06    1.53
  -1 -12   8   28.98    2.09
   1  12  -8   29.39    2.10
   1 -12  -7    0.41    0.47
  -1 -12   7    0.98    0.76
   1  12  -7    1.09    0.80
   1  12  -6    7.14    1.21
  -1 -12   6    7.15    1.27
   1  12  -6    6.88    1.28
   1  12  -6    6.79    1.27
   1 -12  -6    5.30    0.82
   1  12  -5   12.14    1.56
   1 -12  -5    9.57    1.04
   1  12  -5   13.62    1.66
  -1 -12   5   12.56    1.60
  -1 -12   4  100.30    4.37
   1  12  -4  103.39    4.46
   1  12  -4   99.06    4.38
   1  12  -3    2.26    1.00
  -1 -12   3    0.62    0.82
  -1  12   3    1.40    0.66
  -1  12   3    1.23    0.66
   1  12  -3    3.38    1.08
  -1  12   2   12.72    1.47
   1  12  -2   13.08    1.66
  -1  12   2   12.43    1.42
  -1 -12   2   14.34    1.67
   1  12  -2   12.34    1.64
   1  12  -1   69.69    3.55
  -1  12   1   68.78    3.39
  -1 -12   1   73.66    3.65
   1  12  -1   73.40    3.67
  -1  12   1   72.71    3.49
   1  12   0  253.33    7.36
  -1  12   0  262.94    7.58
  -1 -12   0  259.78    7.49
   1  12   0  255.94    7.41
  -1  12   0  260.63    7.56
   1  12   1   78.91    3.55
  -1  12  -1   89.10    4.05
   1 -12   1   81.70    3.50
   1  12   1   85.91    3.68
  -1 -12  -1   87.28    3.82
  -1  12  -1   82.11    3.92
   1 -12   2  229.09    6.63
   1  12   2  220.60    6.27
  -1  12  -2  236.52    7.23
  -1 -12  -2  235.63    6.75
  -1  12  -2  244.62    8.01
  -1  12  -2  232.60    7.22
   1  12   2  227.88    6.34
  -1  12  -3   11.44    1.74
   1 -12   3   12.67    1.44
  -1  12  -3   10.89    1.55
  -1 -12  -3   11.04    1.32
  -1  12  -3   11.03    1.56
  -1  12  -4   59.90    3.67
  -1  12  -4   53.33    3.11
  -1  12  -4   54.10    3.17
   1 -12   4   53.27    2.88
  -1 -12  -4   52.83    2.64
  -1  12  -5  209.19    6.59
   1 -12   5  207.34    6.26
  -1  12  -5  207.98    6.55
  -1  12  -5  213.88    7.25
  -1  12  -6   77.20    3.96
   1 -12   6   71.98    3.30
  -1  12  -7    2.03    0.96
   1 -12   7    2.22    0.80
  -1  12  -8  190.80    6.13
  -1  12  -8  185.03    5.42
   1 -12   8  185.85    5.44
  -1  12  -8  184.29    5.40
  -1  12  -9    8.26    0.98
   1 -12   9    9.16    1.07
  -1  12  -9    8.95    1.01
  -1  12  -9    9.28    1.29
   1  13  -6  131.49    4.26
   1  13  -6  133.89    4.28
  -1 -13   6  136.54    4.24
   1  13  -5   18.39    1.55
   1  13  -5   18.34    1.55
  -1 -13   5   19.43    1.54
  -1 -13   4  555.72   11.90
   1  13  -4  554.53   12.02
   1  13  -4  568.39   12.09
  -1 -13   3   12.68    1.34
   1  13  -3   13.06    1.41
   1  13  -3   13.00    1.41
   1  13  -2   45.29    2.46
   1  13  -2   44.35    2.41
  -1 -13   2   42.80    2.33
  -1  13   1    5.74    0.92
   1  13  -1    7.03    1.02
  -1 -13   1    6.19    0.97
   1  13  -1    6.87    1.04
  -1  13   1    6.48    0.95
   1  13   0   78.71    3.09
  -1  13   0   78.80    3.20
   1  13   0   77.62    3.08
  -1  13   0   79.25    3.22
  -1 -13   0   79.93    3.15
  -1 -13  -1   33.48    1.92
  -1  13  -1   32.54    2.09
  -1  13  -1   32.62    2.08
  -1  13  -2  302.31    7.71
  -1  13  -2  308.89    7.74
  -1  13  -3    0.36    0.67
  -1  13  -3    0.96    0.67
  -1  13  -4  329.71    8.08
  -1  13  -4  328.75    8.05
  -1  13  -5   23.54    1.71
  -1  13  -5   24.69    1.74
  -1  13  -6  244.16    6.25
  -1  13  -6  253.42    6.34
  -1  13  -6  250.62    6.70
  -2   0  20  871.35   17.46
  -2   0  19   -0.29    0.77
   2   0 -19    0.70    0.53
  -2   0  18    8.14    1.65
   2   0 -18    7.92    1.24
   2   0 -17    1.06    1.10
   2   0 -17   -0.07    0.84
  -2   0  17   -0.32    1.16
   2   0 -16  317.52    8.65
   2   0 -16  350.25    9.54
   2   0 -16  350.84   10.28
  -2   0  16  338.28   10.97
   2   0 -16  331.81   10.01
   2   0 -15    2.32    0.92
  -2   0  15   -0.12    1.32
   2   0 -15    0.28    0.86
   2   0 -15    0.32    0.97
   2   0 -15    0.19    1.01
   2   0 -14   46.60    3.34
  -2   0  14   57.34    4.14
   2   0 -14   50.97    3.39
   2   0 -14   49.16    3.23
   2   0 -14   48.70    2.87
   2   0 -13    0.24    0.59
  -2   0  13    0.67    1.18
   2   0 -13    0.59    0.93
   2   0 -12   22.97    1.83
   2   0 -12   30.88    2.37
  -2   0  12   25.24    2.68
   2   0 -11   -0.05    0.56
  -2   0  11   -0.57    1.10
   2   0 -11    1.09    0.84
   2   0 -10  170.81    5.05
   2   0 -10  182.84    5.88
   2   0 -10  196.54    5.81
  -2   0  10  178.97    6.50
  -2   0  10  186.71    6.75
   2   0 -10  197.34    5.88
  -2   0   9    0.30    0.87
   2   0  -9    2.33    0.88
   2   0  -9    0.75    0.48
   2   0  -9    2.88    0.83
  -2   0   9    0.07    0.71
   2   0  -9    0.43    0.76
   2   0  -8 1836.58   32.55
   2   0  -8 1788.44   32.58
   2   0  -8 1892.40   32.59
  -2   0   8 1812.91   33.47
  -2   0   7    0.89    0.73
   2   0  -7    0.37    0.62
   2   0  -7    0.47    0.61
   2   0  -7    0.98    0.54
  -2   0   6  238.10    6.21
   2   0  -6  246.55    5.77
   2   0  -6  257.00    6.10
   2   0  -5    0.55    0.54
   2   0  -5    0.47    0.50
  -2   0   5    0.85    0.56
   2   0  -3    1.07    0.45
   2   0  -3    0.77    0.37
  -2   0   1    0.98    0.41
   2   0  -1    0.29    0.34
   2   0  -1    0.43    0.27
  -2   0  -1    0.76    0.19
   2   0   1    0.69    0.20
   2   0   1    0.61    0.22
   2   0   2  610.23   10.30
   2   0   2  606.98   10.15
  -2   0  -2  590.41   10.34
   2   0   3    0.43    0.19
  -2   0  -3    0.57    0.25
   2   0   5    0.52    0.31
  -2   0  -5    0.18    0.32
  -2   0  -5    0.35    0.28
  -2   0  -6 3926.35   65.85
  -2   0  -6 3906.61   65.15
  -2   0  -7    0.72    0.50
  -2   0  -7    1.08    0.41
  -2   0  -7    1.04    0.62
   2   0   7    0.03    0.37
  -2   0  -7   -0.04    0.52
  -2   0  -7    0.28    0.46
  -2   0  -8 1683.73   30.08
  -2   0  -8 1662.23   29.34
  -2   0  -8 1620.64   29.35
  -2   0  -8 1635.76   29.57
  -2   0  -8 1611.29   29.59
  -2   0  -8 1692.76   28.87
   2   0   8 1697.51   29.06
  -2   0  -9    0.26    0.49
  -2   0  -9    1.21    0.74
  -2   0  -9    0.27    0.32
  -2   0  -9    0.58    0.58
  -2   0  -9    0.19    0.57
  -2   0 -10 2245.99   40.03
  -2   0 -10 2235.42   39.63
  -2   0 -10 2253.84   39.85
  -2   0 -10 2230.34   40.42
  -2   0 -11   -0.14    0.78
  -2   0 -11    0.67    0.59
  -2   0 -11    0.70    0.69
   2   0  12  383.19   12.38
  -2   0 -12  359.73    9.26
  -2   0 -12  360.57    9.37
  -2   0 -12  388.08   10.22
  -2   0 -13    0.50    0.98
  -2   0 -13    0.07    0.60
   2   0  13    2.40    1.49
  -2   0 -13    0.08    0.89
  -2   0 -13    0.53    0.78
   2   0  14 1388.87   30.02
  -2   0 -14 1406.26   27.91
  -2   0 -14 1390.69   27.37
  -2   0 -14 1353.09   26.47
   2   0  15   -0.12    1.18
  -2   0 -15    0.35    1.05
  -2   0 -15    0.79    0.73
  -2   0 -15   -0.54    0.84
   2   0  16   34.12    3.05
  -2   0 -16   42.11    2.99
  -2   0 -16   39.98    2.70
  -2   0 -17    0.36    0.82
   2   0  17    0.66    0.84
  -2   0 -17    0.53    0.61
   2   0  18  502.21   12.39
   2   0  18  533.79   12.19
  -2   0 -19    0.13    0.51
  -2   1  20   34.02    2.18
  -2  -1  20   27.92    1.94
  -2   1  19   74.70    3.86
  -2  -1  19   78.76    3.80
   2   1 -19   67.85    2.97
  -2   1  18    1.48    1.03
   2  -1 -18    1.35    0.64
   2  -1 -18    1.78    0.70
  -2  -1  18    3.85    1.27
   2   1 -18    1.07    0.83
  -2  -1  17    5.82    1.62
   2  -1 -17    5.28    1.40
   2  -1 -17    5.48    1.07
  -2   1  17    7.25    1.76
   2   1 -17    7.77    1.44
   2  -1 -17    5.48    1.11
   2   1 -16  389.57   11.34
   2   1 -16  421.94   11.06
   2   1 -16  415.63   11.57
   2  -1 -16  402.41   10.22
  -2   1  16  435.44   12.74
   2  -1 -16  407.71   11.31
  -2  -1  16  417.18   12.22
   2  -1 -16  375.99   11.00
   2  -1 -16  411.07   10.40
   2  -1 -15 1171.48   24.02
   2  -1 -15 1222.41   25.38
   2  -1 -15 1280.58   24.54
  -2  -1  15 1245.12   26.67
   2   1 -15 1252.53   25.05
  -2   1  15 1283.64   27.26
   2   1 -15 1170.62   25.37
   2  -1 -15 1169.43   25.08
   2  -1 -14  355.34   10.06
   2   1 -14  370.17   10.01
   2  -1 -14  336.72    9.83
  -2   1  14  360.08   11.41
   2  -1 -14  326.69    9.20
  -2  -1  14  354.93   11.00
   2  -1 -14  333.75    9.04
   2   1 -14  322.68    8.46
  -2  -1  14  300.74    8.89
   2   1 -13  306.46    8.07
   2  -1 -13  329.60    9.43
  -2  -1  13  327.47   10.42
   2  -1 -13  320.56    9.25
  -2   1  13  336.32   10.75
  -2  -1  13  304.23    8.87
   2   1 -13  338.38    9.31
   2  -1 -13  310.44    8.50
   2  -1 -13  323.76    8.85
  -2  -1  12   61.06    3.39
   2   1 -12   62.45    2.91
  -2  -1  12   64.98    4.09
   2   1 -12   67.75    3.55
   2  -1 -12   68.25    3.40
   2  -1 -12   61.77    3.14
   2  -1 -11  108.03    4.23
   2  -1 -11  105.17    4.02
   2   1 -11  115.74    4.50
  -2  -1  11  115.49    5.21
   2   1 -11  118.57    4.68
   2   1 -11  109.43    4.62
   2   1 -11  102.50    3.70
  -2  -1  11   99.49    4.28
   2  -1 -10  317.15    8.01
  -2  -1  10  282.90    8.14
   2   1 -10  299.17    7.24
  -2   1  10  305.87    9.21
   2   1 -10  341.50    8.49
   2   1 -10  331.01    8.52
  -2  -1  10  335.81    9.37
  -2  -1  10  320.36    9.12
   2   1 -10  321.49    8.20
   2  -1 -10  311.23    7.66
  -2  -1   9   58.87    3.19
   2   1  -9   59.20    2.91
   2   1  -9   56.17    2.27
   2   1  -9   59.83    2.89
  -2  -1   9   61.61    3.40
  -2  -1   9   54.42    2.78
   2  -1  -9   55.99    2.78
   2  -1  -9   55.34    2.47
   2  -1  -9   60.70    2.78
  -2   1   9   61.56    3.42
   2  -1  -8 1455.95   27.42
   2  -1  -8 1475.34   26.55
   2   1  -8 1542.75   27.30
  -2  -1   8 1479.17   27.90
   2  -1  -8 1531.39   27.24
  -2   1   8 1509.59   28.90
   2  -1  -8 1548.35   27.08
   2   1  -8 1487.60   27.35
  -2   1   8 1477.12   28.34
  -2  -1   8 1504.79   28.43
   2   1  -7 1351.54   25.33
   2   1  -7 1415.70   25.43
   2   1  -7 1408.83   25.65
  -2  -1   7 1439.77   25.95
   2  -1  -7 1424.41   25.37
  -2  -1   7 1391.36   26.23
  -2   1   7 1408.46   26.87
   2   1  -7 1465.97   25.39
  -2   1   7 1376.04   26.27
  -2  -1   6    6.35    0.90
   2  -1  -6    8.49    0.98
   2   1  -6    5.18    0.83
   2   1  -6    5.84    0.81
   2  -1  -6    6.06    0.90
  -2  -1   5 2423.63   41.44
   2  -1  -5 2428.86   41.44
   2  -1  -5 2452.08   41.20
   2   1  -5 2432.23   41.31
   2   1  -5 2386.08   40.98
  -2   1   5 2401.10   41.90
   2  -1  -4  396.07    8.00
  -2   1   4  405.90    8.51
   2  -1  -4  391.37    8.19
   2   1  -4  389.63    7.73
   2   1  -4  392.21    7.99
  -2   1   3 3184.71   53.65
  -2  -1   2  628.74   11.66
   2   1  -2  644.10   11.38
   2  -1  -2  668.97   12.08
   2  -1  -2  643.11   11.88
   2   1  -2  673.99   11.66
  -2   1  -1  375.68    7.11
   2  -1   1  385.85    7.08
   2  -1   2   29.97    1.12
  -2   1  -2   29.80    1.18
  -2   1  -2   28.93    1.13
   2  -1   3   71.74    1.96
  -2   1  -3   66.41    2.05
  -2  -1  -3   70.84    1.54
  -2  -1  -4  284.51    5.40
   2  -1   4  292.64    5.76
  -2   1  -4  295.20    5.90
  -2   1  -4  286.06    6.01
   2   1   5 1861.29   31.11
  -2  -1  -5 1906.36   30.96
  -2  -1  -5 1838.55   31.42
   2  -1   5 1886.96   31.74
  -2   1  -5 1871.21   31.89
  -2   1  -5 1848.89   32.10
  -2   1  -6 5158.15   85.98
  -2   1  -6 5210.75   85.33
  -2  -1  -6 5034.47   85.83
  -2  -1  -6 5021.33   85.53
   2   1   6 5174.73   84.64
  -2   1  -6 5297.45   85.96
  -2   1  -7 2575.27   44.97
  -2  -1  -7 2609.02   45.24
  -2  -1  -7 2664.02   44.63
  -2  -1  -7 2601.94   45.52
  -2  -1  -7 2632.36   44.05
  -2   1  -7 2551.92   45.61
   2  -1   7 2679.76   44.83
  -2   1  -7 2718.73   45.71
  -2   1  -7 2648.96   45.27
   2   1   7 2709.87   44.42
  -2   1  -7 2639.78   44.97
  -2  -1  -8   44.81    2.27
  -2   1  -8   46.22    2.13
   2  -1   8   47.43    2.11
  -2   1  -8   42.61    2.20
  -2   1  -8   42.61    2.12
  -2  -1  -8   43.01    1.67
  -2   1  -8   42.71    2.33
  -2  -1  -8   39.19    1.96
  -2  -1  -8   40.88    1.92
  -2  -1  -8   45.24    2.43
   2   1   8   44.53    1.90
  -2  -1  -9   21.45    1.50
  -2  -1  -9   24.21    1.89
  -2   1  -9   21.72    1.68
  -2   1  -9   22.34    1.79
  -2   1  -9   22.42    1.55
  -2  -1  -9   23.03    1.57
  -2   1  -9   22.62    1.82
  -2  -1  -9   23.38    1.52
  -2  -1  -9   25.88    1.84
  -2  -1 -10  254.57    7.13
  -2   1 -10  264.82    7.41
  -2  -1 -10  245.61    6.51
  -2  -1 -10  246.94    6.46
  -2   1 -10  245.73    7.11
  -2   1 -10  260.68    7.07
   2  -1  10  250.36    8.81
  -2  -1 -10  240.33    6.48
  -2   1 -11   24.96    2.19
  -2  -1 -11   31.49    2.32
   2  -1  11   25.91    2.74
  -2  -1 -11   33.83    2.49
  -2   1 -11   27.51    2.11
  -2   1 -11   30.35    2.27
  -2   1 -11   29.80    2.29
  -2  -1 -11   25.74    1.84
  -2  -1 -11   26.16    1.86
   2  -1  12   26.23    2.84
  -2   1 -12   29.06    2.24
  -2  -1 -12   29.48    2.45
  -2   1 -12   26.96    2.37
  -2   1 -12   30.34    2.43
  -2  -1 -12   24.76    1.89
  -2  -1 -12   28.89    2.00
  -2   1 -12   29.18    2.36
   2   1  13   55.46    4.58
  -2   1 -13   58.51    3.56
  -2  -1 -13   60.97    3.63
   2  -1  13   64.00    4.32
  -2   1 -13   57.06    3.26
  -2   1 -13   58.60    3.46
  -2   1 -13   58.74    3.38
  -2  -1 -13   55.67    2.84
  -2  -1 -14  789.95   17.79
   2  -1  14  790.95   18.84
  -2   1 -14  794.42   17.70
  -2   1 -14  801.19   17.16
  -2   1 -14  776.67   17.35
   2   1  14  783.30   20.30
  -2   1 -14  719.93   16.68
   2  -1  15 1139.77   24.73
  -2  -1 -15 1168.48   24.06
  -2   1 -15 1153.83   23.96
  -2   1 -15 1145.76   23.54
   2   1  15 1177.04   26.40
  -2  -1 -15 1188.92   23.50
  -2   1 -15 1115.01   23.00
  -2   1 -16  284.63    8.51
   2   1  16  287.69    9.77
  -2  -1 -16  285.01    8.61
  -2   1 -16  267.69    7.65
  -2  -1 -16  283.79    8.07
  -2   1 -16  270.30    8.05
   2  -1  16  272.49    8.70
   2   1  17   56.82    3.67
   2  -1  17   53.64    3.13
  -2   1 -17   50.89    3.07
  -2  -1 -17   57.24    2.90
  -2  -1 -17   54.78    3.24
  -2   1 -17   51.79    2.60
  -2   1 -17   54.95    2.88
   2   1  18   25.86    2.16
  -2   1 -18   25.46    1.96
  -2  -1 -18   25.48    2.02
   2  -1  18   22.33    2.07
  -2  -1 -19   10.65    1.17
  -2   2  20  222.01    6.14
  -2  -2  20  207.38    5.65
   2   2 -19   63.83    2.93
  -2   2  19   68.97    3.59
  -2  -2  19   65.06    3.28
  -2  -2  18    2.02    1.04
   2  -2 -18    1.31    0.87
   2   2 -18    1.44    0.93
   2  -2 -18    2.02    0.76
   2  -2 -17    3.53    1.20
   2  -2 -17    4.14    1.07
   2   2 -17    4.88    1.30
  -2  -2  17    3.05    1.30
   2  -2 -16    5.74    1.31
   2  -2 -16    5.68    1.25
   2   2 -16    8.82    1.66
  -2  -2  16    8.66    1.73
   2  -2 -16    9.71    1.70
   2   2 -16    7.58    1.55
   2  -2 -16    7.23    1.19
   2   2 -15   41.72    3.18
  -2  -2  15   44.37    3.63
   2  -2 -15   46.68    3.20
   2  -2 -15   44.75    2.75
   2  -2 -15   46.77    3.30
   2  -2 -15   47.84    3.01
  -2  -2  14   41.56    3.45
   2  -2 -14   43.12    2.87
   2  -2 -14   39.57    2.94
   2   2 -14   43.19    3.11
   2  -2 -14   44.27    2.77
  -2  -2  14   37.56    2.77
   2  -2 -14   46.25    3.20
   2   2 -13   60.41    3.75
   2   2 -13   60.91    3.79
   2  -2 -13   60.16    3.20
   2  -2 -13   57.17    3.23
  -2  -2  13   61.07    4.02
   2  -2 -13   58.92    3.47
  -2  -2  13   56.62    3.46
   2  -2 -13   61.78    3.65
   2  -2 -12   15.85    1.84
   2   2 -12   16.89    2.02
   2   2 -12   14.55    1.91
   2  -2 -12   14.35    1.76
   2  -2 -12   14.51    1.60
   2  -2 -12   20.34    1.84
  -2  -2  12   16.79    2.18
  -2  -2  12   14.62    1.79
   2  -2 -11   27.01    2.19
   2  -2 -11   23.33    1.90
  -2   2  11   26.38    2.75
   2  -2 -11   25.77    1.97
   2  -2 -11   23.08    2.01
   2   2 -11   24.41    2.25
   2   2 -11   23.80    2.20
  -2  -2  11   25.85    2.46
  -2  -2  11   23.62    2.15
   2   2 -10   11.44    1.52
  -2  -2  10    8.98    1.34
  -2   2  10   10.78    1.86
   2  -2 -10   10.06    1.22
   2   2 -10    9.21    1.12
  -2  -2  10   11.39    1.66
  -2   2  10   15.48    1.99
   2  -2 -10   11.09    1.32
   2   2 -10    9.77    1.13
   2   2 -10    8.34    1.33
   2   2 -10   11.92    1.53
  -2  -2   9    8.00    1.25
   2  -2  -9   11.40    1.18
   2  -2  -9   10.92    1.23
   2   2  -9   10.53    1.30
  -2  -2   9   12.69    1.57
  -2   2   9   12.87    1.88
  -2  -2   9   10.62    1.40
   2   2  -9   22.93    1.85
   2   2  -9   12.99    1.34
  -2   2   9   11.23    1.60
   2   2  -9   13.01    1.45
   2   2  -9   24.36    1.92
   2   2  -8    7.79    1.12
   2   2  -8    7.22    1.12
  -2  -2   8    9.62    1.21
  -2   2   8    6.76    1.30
  -2   2   8    7.33    1.42
  -2  -2   8    7.11    1.20
   2  -2  -8    7.62    1.06
  -2  -2   8    7.49    1.12
  -2  -2   8    7.65    1.20
  -2  -2   8   11.66    1.28
   2   2  -8    5.99    1.08
   2  -2  -8    6.94    0.93
   2   2  -7  990.09   18.39
   2   2  -7  942.29   18.66
   2   2  -7  976.61   18.37
  -2  -2   7  978.06   18.73
   2   2  -7  963.32   18.40
   2  -2  -7  990.74   18.40
  -2  -2   7  952.17   18.92
   2  -2  -7  958.41   17.89
  -2   2   7  945.71   19.46
   2  -2  -7  989.92   18.68
  -2   2   7  939.55   19.84
  -2  -2   6  654.85   13.24
   2  -2  -6  676.74   13.13
   2   2  -6  663.28   13.29
  -2   2   6  644.21   13.97
   2   2  -6  657.79   12.97
  -2  -2   6  647.25   13.44
   2   2  -6  674.29   12.98
  -2   2   5 2822.88   49.06
   2  -2  -5 2823.32   48.44
   2  -2  -5 2872.80   48.22
   2   2  -5 2832.53   47.86
   2   2  -5 2797.85   48.17
  -2   2   4    7.35    1.02
   2   2  -4    5.92    0.71
   2   2  -4    5.91    0.74
   2  -2  -4    5.12    0.80
   2   2  -3 1421.68   24.36
   2  -2  -3 1427.86   25.01
  -2  -2   3 1378.65   24.56
   2  -2  -3 1432.18   25.24
   2   2  -3 1440.90   24.68
  -2   2   3 1425.06   25.56
   2   2  -2  110.32    2.85
   2   2  -2  104.57    2.60
  -2  -2   2  106.44    2.78
   2  -2  -2  105.04    3.08
   2  -2  -2  101.98    3.22
  -2  -2   1 1401.70   23.55
   2  -2  -1 1368.41   24.49
   2  -2  -1 1390.44   24.14
   2   2  -1 1359.74   23.29
   2   2  -1 1430.32   23.62
   2   2   0  269.69    5.01
   2   2   0  288.54    5.31
  -2  -2   0  281.00    5.25
   2  -2   0  280.05    6.27
   2  -2   0  282.74    5.90
  -2   2  -1 2308.65   39.81
  -2   2  -1 2425.88   39.90
  -2   2  -2  323.56    6.52
   2  -2   2  319.56    6.43
  -2  -2  -2  311.40    5.27
  -2  -2  -2  303.83    5.31
  -2   2  -2  328.35    6.56
  -2  -2  -3 1475.95   24.36
   2  -2   3 1450.74   25.54
  -2   2  -3 1548.31   25.74
  -2   2  -3 1470.86   25.73
  -2   2  -4  321.42    6.84
  -2   2  -4  314.19    6.88
   2  -2   4  315.15    6.67
  -2  -2  -4  317.81    5.77
  -2  -2  -5  399.87    7.05
  -2  -2  -5  414.30    7.04
  -2  -2  -5  409.04    8.65
  -2  -2  -5  399.39    7.49
   2  -2   5  413.82    8.30
  -2   2  -5  404.91    8.49
  -2   2  -5  399.91    8.71
  -2   2  -5  407.28    8.60
  -2   2  -5  410.12    8.71
  -2  -2  -6   48.09    1.66
  -2  -2  -6   47.34    1.36
  -2   2  -6   52.04    2.38
   2  -2   6   53.42    2.14
  -2  -2  -6   49.01    2.27
  -2  -2  -6   50.34    1.37
  -2   2  -6   51.63    2.42
  -2  -2  -6   45.82    2.20
  -2   2  -6   48.85    2.30
  -2   2  -6   51.24    2.22
  -2   2  -6   46.73    2.23
  -2   2  -7   39.09    2.21
  -2  -2  -7   31.85    1.46
  -2   2  -7   32.18    1.85
  -2   2  -7   32.52    1.94
  -2  -2  -7   31.64    1.19
  -2   2  -7   31.06    1.96
  -2   2  -7   42.04    2.22
  -2  -2  -7   32.78    1.19
  -2  -2  -7   38.90    2.08
   2  -2   7   33.97    1.80
   2  -2   8  584.69   13.51
  -2   2  -8  637.32   12.96
  -2   2  -8  590.67   12.66
  -2  -2  -8  584.55   11.42
  -2  -2  -8  563.92   10.72
  -2   2  -8  601.12   12.75
   2  -2   8  612.97   12.13
  -2   2  -8  600.91   12.38
  -2   2  -8  610.51   12.63
  -2  -2  -8  601.33   12.51
  -2  -2  -8  571.24   10.69
   2  -2   9   45.39    2.37
  -2   2  -9   48.07    2.75
   2  -2   9   42.06    2.90
  -2  -2  -9   44.50    2.06
  -2   2  -9   46.90    2.67
  -2   2  -9   49.51    2.72
  -2   2  -9   44.77    2.56
  -2  -2  -9   42.18    2.46
  -2   2 -10    3.08    0.89
  -2  -2 -10   -0.08    0.48
  -2  -2 -10    0.39    0.73
  -2  -2 -10    4.12    1.01
   2  -2  10   -0.25    0.87
  -2   2 -10    2.03    0.82
  -2   2 -10    1.98    0.93
  -2  -2 -11   55.72    3.17
  -2   2 -11   55.53    3.21
  -2  -2 -11   60.27    3.37
  -2   2 -11   54.63    3.12
   2  -2  11   53.49    3.53
  -2   2 -11   54.64    3.17
  -2  -2 -11   51.88    2.52
  -2   2 -11   51.15    3.17
  -2  -2 -12  229.85    7.35
  -2   2 -12  220.21    7.22
  -2   2 -12  242.50    7.61
  -2   2 -12  240.68    7.52
  -2   2 -12  228.52    7.41
  -2  -2 -12  240.64    7.63
   2  -2  12  225.48    7.94
  -2   2 -13    7.93    1.54
  -2   2 -13    4.88    1.17
  -2  -2 -13    8.43    1.65
   2  -2  13    8.51    1.61
  -2   2 -13    8.46    1.53
  -2   2 -13    9.49    1.59
  -2   2 -14    2.43    0.98
  -2   2 -14    2.94    1.22
   2  -2  14    2.43    1.11
  -2   2 -14    2.66    1.15
  -2   2 -14    3.09    1.14
   2   2  14    5.39    1.86
  -2  -2 -14    2.47    1.31
  -2  -2 -15   77.95    4.25
   2   2  15   77.39    5.35
   2  -2  15   77.30    4.14
  -2   2 -15   76.69    4.11
  -2   2 -15   77.16    4.04
  -2   2 -15   82.32    4.08
  -2   2 -16   14.93    1.72
  -2   2 -16   15.31    1.89
   2  -2  16   13.31    1.67
  -2  -2 -16   16.97    1.97
  -2  -2 -16   14.11    1.63
   2   2  16   16.92    2.44
  -2   2 -16   11.61    1.54
  -2   2 -17   28.21    2.22
   2   2  17   30.48    2.75
   2  -2  17   27.82    2.71
  -2  -2 -17   26.85    1.96
  -2   2 -17   27.39    2.02
   2   2  18   68.19    3.53
  -2  -2 -18   64.96    3.17
   2  -2  18   60.98    3.31
  -2   2 -18   54.85    2.45
  -2   2 -18   60.07    2.86
  -2  -2 -19  363.16    8.33
   2   2  19  354.18    8.39
   2  -3 -19   67.41    2.74
  -2  -3  19   71.56    3.19
   2   3 -19   76.32    3.17
  -2  -3  18  277.21    8.11
   2  -3 -18  279.30    7.72
   2  -3 -18  274.18    7.32
   2   3 -18  284.00    7.89
   2   3 -17   51.74    3.28
  -2  -3  17   53.33    3.46
  -2   3  17   53.42    3.77
   2  -3 -17   50.95    3.16
   2  -3 -17   51.12    2.97
  -2  -3  16    2.41    0.87
   2  -3 -16    2.99    1.11
   2  -3 -16    2.63    1.07
  -2   3  16    4.45    1.60
  -2  -3  16    3.02    1.23
   2   3 -16    7.26    1.61
   2  -3 -16    2.89    1.05
  -2  -3  15    0.31    1.11
   2  -3 -15   -0.23    0.86
  -2   3  15    1.63    1.33
   2  -3 -15   -0.34    0.87
  -2  -3  15    1.54    0.89
   2  -3 -15    0.17    0.97
  -2  -3  14  138.96    5.74
   2  -3 -14  150.60    5.70
  -2   3  14  156.99    7.26
   2  -3 -14  149.04    5.92
   2   3 -14  153.46    6.43
   2  -3 -14  144.62    4.96
  -2  -3  14  159.78    6.70
   2  -3 -14  156.25    6.06
   2  -3 -13  100.34    4.67
   2  -3 -13  104.39    4.54
  -2  -3  13  105.53    5.25
   2  -3 -13  103.90    4.68
  -2  -3  13  102.60    4.83
   2  -3 -13   97.64    3.96
   2   3 -13  102.59    5.05
   2   3 -13   93.47    4.72
  -2   3  13   95.65    5.68
   2  -3 -12   86.86    4.20
   2  -3 -12   82.30    3.88
  -2  -3  12   76.16    4.15
   2   3 -12   76.44    4.07
  -2   3  12   84.60    5.13
   2  -3 -12   85.19    4.07
  -2  -3  12   80.68    4.43
   2   3 -12   83.66    4.36
   2  -3 -12   87.91    3.60
   2   3 -12   82.48    4.40
   2  -3 -11  198.83    6.19
   2   3 -11  194.56    6.77
   2   3 -11  197.31    6.82
   2  -3 -11  197.29    6.37
  -2   3  11  202.75    8.00
   2   3 -11  191.78    5.68
  -2  -3  11  195.52    7.06
  -2  -3  11  194.58    6.77
   2   3 -11  184.55    5.62
   2  -3 -11  206.19    5.84
   2   3 -11  197.47    6.58
  -2  -3  10 2586.55   46.45
   2   3 -10 2642.18   46.25
  -2   3  10 2619.87   48.58
   2  -3 -10 2505.47   45.24
   2   3 -10 2523.98   45.06
   2  -3 -10 2506.00   45.54
   2   3 -10 2513.95   45.03
   2   3 -10 2564.66   46.34
  -2  -3  10 2563.30   46.65
   2  -3 -10 2538.77   44.67
   2   3 -10 2714.79   46.02
  -2   3   9    3.74    1.13
   2   3  -9    4.24    1.05
  -2  -3   9    5.14    1.13
  -2   3   9    5.21    1.44
   2   3  -9    2.91    0.90
  -2  -3   9    3.18    0.95
   2   3  -9    2.98    0.95
   2  -3  -9    5.79    0.92
  -2  -3   9    3.14    0.93
   2  -3  -9    2.28    0.72
   2   3  -9    3.61    0.92
  -2   3   8  699.97   16.64
   2   3  -8  740.19   15.20
   2  -3  -8  730.62   14.56
  -2  -3   8  721.79   15.39
   2   3  -8  746.20   15.11
   2   3  -8  732.28   14.88
   2  -3  -8  734.84   14.20
   2   3  -8  720.84   14.95
  -2  -3   8  725.36   15.50
  -2   3   8  681.50   16.31
   2   3  -8  698.32   14.94
  -2  -3   8  737.94   15.45
   2   3  -7  198.31    5.55
   2  -3  -7  183.37    5.63
  -2  -3   7  191.91    5.70
   2   3  -7  190.34    5.36
  -2  -3   7  187.69    5.63
  -2  -3   7  190.42    5.76
  -2  -3   7  184.77    5.67
  -2   3   7  183.24    6.29
  -2  -3   7  190.92    5.70
  -2   3   7  183.06    6.38
   2   3  -7  185.77    5.51
   2  -3  -7  186.60    5.12
   2   3  -6  102.25    3.54
  -2  -3   6   95.83    3.66
   2   3  -6  103.10    3.76
  -2  -3   6   97.31    3.68
  -2  -3   6  105.11    3.78
   2  -3  -6   96.35    3.70
  -2  -3   6  100.96    3.71
   2   3  -6  101.51    3.46
  -2   3   6   99.46    4.25
   2   3  -6  100.78    3.57
   2  -3  -6  101.92    3.64
   2   3  -5  715.35   13.71
  -2  -3   5  690.98   13.95
   2   3  -5  706.27   14.01
   2  -3  -4 1099.31   20.00
  -2  -3   4 1073.73   19.52
   2   3  -4 1071.77   19.30
   2  -3  -4 1073.87   19.93
   2  -3  -4 1041.88   20.15
   2   3  -4 1052.26   19.64
  -2  -3   3  513.07   10.22
   2  -3  -3  505.62   10.97
  -2   3   3  521.33   10.70
   2  -3  -3  524.36   10.69
   2   3  -3  528.03   10.35
   2   3  -3  517.77   10.04
   2   3  -2  382.09    7.64
   2  -3  -2  391.40    8.33
  -2  -3   2  394.39    7.87
  -2   3   2  387.57    8.33
   2  -3  -2  388.02    8.74
   2   3  -2  390.58    7.94
   2  -3  -1  241.27    5.68
   2   3  -1  241.95    5.22
   2   3  -1  240.67    4.98
  -2  -3   1  231.04    5.09
   2  -3  -1  234.64    6.10
   2  -3   0  601.39   11.54
  -2  -3   0  589.20   10.78
   2   3   0  590.96   10.83
   2   3   0  593.51   10.56
  -2   3  -1   72.24    2.59
   2   3   1   69.65    1.82
  -2  -3  -1   72.90    1.98
   2   3   1   70.97    1.98
   2  -3   1   74.14    2.55
  -2   3  -2 1770.18   31.66
   2  -3   2 1850.07   31.65
  -2  -3  -2 1764.73   30.33
  -2   3  -2 1842.38   31.77
  -2  -3  -2 1871.46   30.74
  -2  -3  -2 1866.41   30.45
  -2  -3  -3  513.14    9.14
   2  -3   3  530.37   10.44
  -2  -3  -3  509.02    9.25
  -2   3  -3  515.32   10.56
  -2   3  -3  530.79   10.61
  -2  -3  -3  530.73    9.18
  -2  -3  -4  531.22   10.65
  -2  -3  -4  536.57    9.26
  -2  -3  -4  520.41    9.22
  -2   3  -4  525.97   10.92
  -2   3  -4  523.51   10.80
  -2   3  -4  533.11   10.85
  -2  -3  -4  511.98    9.34
  -2   3  -4  541.53   10.91
  -2  -3  -4  530.21   10.59
   2  -3   4  542.97   10.67
  -2   3  -4  523.38   10.80
  -2  -3  -5   53.44    1.44
  -2  -3  -5   49.67    2.24
  -2  -3  -5   49.83    2.18
  -2  -3  -5   50.93    1.57
  -2   3  -5   50.30    2.35
  -2  -3  -5   50.01    2.27
   2  -3   5   48.32    2.20
  -2   3  -5   49.98    2.39
  -2   3  -5   49.39    2.38
  -2   3  -5   50.03    2.36
  -2  -3  -5   49.23    1.36
  -2   3  -5   48.98    2.38
  -2  -3  -6  134.85    3.20
  -2   3  -6  120.19    3.68
  -2   3  -6  125.11    4.17
  -2  -3  -6  122.51    3.98
  -2  -3  -6  123.61    4.01
   2  -3   6  126.86    3.98
  -2   3  -6  123.40    4.27
  -2   3  -6  123.31    3.73
  -2   3  -6  126.95    4.19
  -2  -3  -6  121.98    2.77
  -2   3  -6  122.01    4.19
  -2   3  -6  132.12    4.35
  -2  -3  -6  121.38    4.03
  -2   3  -7    1.98    0.59
  -2   3  -7    2.29    0.60
  -2  -3  -7    1.94    0.71
   2  -3   7    2.71    0.70
  -2   3  -7    3.73    0.88
  -2   3  -7    3.39    0.91
  -2  -3  -7    1.69    0.30
  -2  -3  -7    2.10    0.32
  -2   3  -7    1.19    0.72
  -2   3  -7    2.35    0.69
  -2  -3  -7    2.38    0.75
  -2  -3  -7    1.88    0.42
  -2  -3  -8  892.79   17.43
  -2   3  -8  883.44   17.57
  -2  -3  -8  875.87   17.25
  -2  -3  -8  882.25   15.87
  -2   3  -8  851.60   16.20
  -2  -3  -8  893.83   17.38
   2  -3   8  909.16   17.23
  -2   3  -8  917.25   17.77
  -2   3  -8  894.72   17.81
  -2   3  -8  876.71   16.22
  -2   3  -9  892.83   18.27
   2  -3   9  879.70   17.78
  -2  -3  -9  907.22   17.93
  -2  -3  -9  856.41   16.46
  -2   3  -9  917.97   18.45
  -2   3  -9  899.96   18.44
  -2   3 -10  111.89    4.70
  -2   3 -10  101.62    4.42
  -2  -3 -10   99.60    3.38
  -2   3 -10  105.39    4.46
  -2   3 -10  105.74    4.49
  -2   3 -11   97.18    4.47
  -2   3 -11   96.71    4.50
   2  -3  11   96.81    4.37
  -2   3 -11   98.16    4.52
  -2   3 -11   96.02    4.51
  -2   3 -12    0.66    0.78
  -2   3 -12    0.57    0.87
  -2   3 -12    1.85    1.12
  -2   3 -12    0.75    0.89
  -2  -3 -12    0.83    1.09
   2  -3  12    0.31    0.78
   2  -3  13  100.02    4.59
  -2  -3 -13  108.94    5.03
  -2   3 -13  102.47    4.81
  -2   3 -13  105.51    4.91
  -2   3 -13  107.38    5.02
  -2   3 -13  107.91    4.97
  -2  -3 -14   23.06    2.46
  -2   3 -14   15.31    2.02
  -2   3 -14   16.33    2.02
   2   3  14   17.95    3.01
  -2   3 -14   19.45    2.07
  -2   3 -14   19.44    2.12
  -2   3 -15   42.30    2.99
  -2  -3 -15   46.50    3.20
   2   3  15   42.36    4.05
  -2   3 -15   40.59    2.94
  -2   3 -15   43.61    3.04
  -2   3 -16  457.04   11.55
  -2   3 -16  488.19   11.78
   2  -3  16  471.38   13.54
   2   3  16  486.11   14.00
  -2  -3 -16  466.09   11.26
  -2  -3 -16  492.50   12.12
  -2   3 -16  469.15   11.63
  -2  -3 -17    5.01    0.91
  -2   3 -17    4.93    1.04
   2   3  17    3.65    1.33
  -2  -3 -17    5.42    1.22
   2  -3  17    6.28    1.36
  -2   3 -17    4.38    1.02
  -2  -3 -18   53.62    2.79
   2   3  18   51.95    3.07
   2  -3  18   47.92    2.84
  -2   3 -18   47.43    2.33
  -2  -4  19   56.12    2.50
  -2   4  19   62.62    3.02
   2  -4 -19   62.70    2.53
   2   4 -19   60.68    2.77
   2  -4 -18   54.94    2.74
  -2  -4  18   52.11    2.82
   2  -4 -18   54.95    2.74
   2   4 -18   51.81    2.91
  -2   4  18   56.58    3.31
   2  -4 -17   71.65    3.47
  -2   4  17   60.88    3.88
   2  -4 -17   63.56    3.36
  -2  -4  17   66.92    3.63
   2  -4 -16   65.32    3.62
   2  -4 -16   70.32    3.66
  -2   4  16   60.10    4.15
  -2  -4  16   63.32    3.81
  -2  -4  16   59.68    3.21
   2   4 -15  105.07    4.99
   2  -4 -15   97.23    4.61
   2  -4 -15   95.60    4.54
  -2  -4  15   93.17    4.45
  -2   4  15  104.83    5.70
   2   4 -15   83.98    4.87
  -2  -4  15  101.87    5.02
   2  -4 -15   99.47    4.54
   2   4 -14 1382.45   29.06
  -2   4  14 1432.41   30.36
   2  -4 -14 1385.34   27.77
  -2  -4  14 1400.12   28.73
  -2  -4  14 1375.16   28.06
   2   4 -14 1429.20   28.42
   2  -4 -14 1428.64   27.98
   2  -4 -14 1374.59   27.55
   2  -4 -13  524.72   12.96
  -2   4  13  523.67   15.04
  -2  -4  13  502.43   13.22
   2  -4 -13  537.26   12.87
   2  -4 -13  531.33   12.97
  -2  -4  13  527.20   13.77
   2   4 -13  502.76   13.64
   2   4 -13  518.40   13.30
   2  -4 -12 2301.06   41.57
  -2   4  12 2360.42   44.95
   2   4 -12 2256.00   40.32
  -2  -4  12 2196.06   42.76
   2   4 -12 2333.78   42.29
   2   4 -12 2288.16   42.81
   2   4 -12 2178.65   40.18
   2  -4 -12 2300.24   41.79
  -2  -4  12 2294.64   42.59
   2   4 -11    0.77    1.00
   2  -4 -11    1.54    0.95
  -2  -4  11    2.06    0.99
   2  -4 -11    0.72    0.81
  -2   4  11    2.18    1.32
   2   4 -11    1.24    0.74
  -2  -4  11    2.74    1.12
   2   4 -11    1.72    1.16
   2   4 -11    1.47    0.76
   2   4 -10  500.37   12.33
  -2   4  10  514.14   14.28
   2  -4 -10  514.64   12.03
   2  -4 -10  536.41   12.33
  -2  -4  10  518.91   12.87
   2   4 -10  538.26   12.88
  -2  -4  10  522.71   12.95
   2   4 -10  513.51   11.99
   2  -4 -10  518.69   10.99
   2   4 -10  515.16   11.99
   2  -4  -9   32.60    2.32
   2   4  -9   32.18    2.43
  -2   4   9   32.09    3.00
   2   4  -9   33.40    2.39
  -2  -4   9   30.40    2.39
  -2  -4   9   37.49    2.69
   2   4  -9   38.35    2.54
   2  -4  -9   32.92    1.88
   2   4  -9   32.12    2.33
  -2  -4   8 4455.23   77.31
   2   4  -8 4433.39   76.91
  -2  -4   8 4460.60   77.11
  -2  -4   8 4615.22   77.62
   2  -4  -8 4495.90   76.33
   2  -4  -8 4493.21   75.31
   2   4  -8 4353.94   76.53
   2   4  -8 4685.48   77.11
   2   4  -8 4576.34   77.02
   2  -4  -8 4417.97   77.43
   2   4  -7  663.44   13.80
  -2  -4   7  657.78   14.19
   2  -4  -7  635.84   14.15
  -2  -4   7  639.08   13.82
   2   4  -7  638.20   14.09
   2   4  -7  641.18   13.39
   2   4  -7  640.76   14.09
  -2  -4   6   20.54    1.69
   2   4  -6   19.55    1.54
  -2  -4   6   18.83    1.69
   2   4  -6   19.66    1.65
   2   4  -6   20.05    1.90
   2   4  -6   18.12    1.81
   2  -4  -6   20.49    1.76
  -2  -4   5 1552.76   27.83
   2  -4  -5 1467.96   27.77
   2   4  -5 1541.39   27.33
  -2  -4   5 1517.40   27.42
   2  -4  -5 1464.30   28.03
   2   4  -5 1508.23   27.76
  -2  -4   5 1543.54   27.56
   2   4  -5 1492.91   26.88
  -2  -4   4   16.97    1.44
   2   4  -4   13.93    1.31
  -2  -4   4   14.95    1.56
  -2  -4   4   18.29    1.43
   2   4  -4   15.13    1.29
  -2  -4   4   15.24    1.30
  -2  -4   4   16.77    1.61
  -2   4   3    1.51    0.73
   2   4  -3    0.47    0.54
   2   4  -3    0.23    0.52
  -2   4   3    1.18    0.73
  -2  -4   3    0.65    0.53
  -2  -4   3    0.82    0.79
  -2  -4   3    0.78    0.74
   2  -4  -3    0.97    0.79
  -2   4   2   13.60    1.28
  -2  -4   2   10.67    1.01
   2  -4  -2    9.54    1.28
   2  -4  -2    9.65    1.14
   2   4  -2   10.93    0.97
   2   4  -2   10.13    1.02
   2   4  -1   79.21    2.49
   2  -4  -1   80.09    3.46
   2  -4  -1   84.01    3.09
   2   4  -1   75.06    2.67
  -2  -4   1   76.90    2.61
  -2   4   1   82.92    3.08
  -2  -4   0 1612.83   27.40
   2   4   0 1579.45   27.49
   2   4   0 1565.38   27.11
   2  -4   0 1576.12   28.24
  -2   4   0 1580.43   28.28
   2   4   1  855.55   15.12
   2   4   1  839.65   15.33
   2  -4   1  880.68   16.35
  -2  -4  -1  831.09   15.30
  -2   4  -2 2758.26   46.97
  -2   4  -2 2709.06   46.67
  -2  -4  -2 2726.33   45.48
  -2  -4  -2 2651.44   46.34
   2   4   2 2776.72   45.45
  -2  -4  -2 2680.80   46.30
   2  -4   2 2726.47   46.74
  -2  -4  -2 2685.22   45.96
   2  -4   3 1715.71   30.58
  -2   4  -3 1694.38   30.33
  -2  -4  -3 1761.04   29.18
  -2   4  -3 1728.29   30.81
  -2   4  -3 1714.11   30.56
  -2  -4  -3 1709.20   29.13
  -2   4  -3 1713.76   30.87
  -2   4  -3 1709.73   30.33
  -2   4  -3 1686.56   30.36
  -2  -4  -3 1696.38   30.23
  -2  -4  -3 1719.20   30.21
  -2  -4  -3 1722.83   29.44
  -2   4  -4 3269.36   55.77
  -2   4  -4 3170.64   55.34
  -2  -4  -4 3228.55   53.81
  -2   4  -4 3284.77   55.15
  -2   4  -4 3279.22   55.10
  -2  -4  -4 3222.73   54.57
  -2  -4  -4 3216.24   53.68
  -2  -4  -4 3243.42   55.03
   2  -4   4 3303.76   55.38
  -2  -4  -4 3252.86   53.71
  -2   4  -4 3155.87   55.25
  -2   4  -4 3229.90   55.58
  -2  -4  -4 3210.44   55.05
  -2   4  -4 3254.79   55.68
   2  -4   5  271.04    6.87
  -2   4  -5  270.95    7.21
  -2  -4  -5  265.79    5.47
  -2   4  -5  261.26    6.88
  -2   4  -5  285.03    7.06
  -2  -4  -5  271.16    6.50
  -2  -4  -5  266.45    6.70
  -2   4  -5  272.44    6.65
  -2   4  -5  262.64    6.62
  -2  -4  -5  266.17    5.52
  -2   4  -5  278.16    7.14
  -2  -4  -5  264.07    5.44
  -2   4  -5  267.27    7.11
  -2  -4  -5  267.85    6.68
  -2  -4  -6 1137.82   21.35
  -2   4  -6 1183.29   22.08
  -2  -4  -6 1115.39   19.62
  -2  -4  -6 1096.65   19.52
  -2   4  -6 1165.69   21.78
  -2  -4  -6 1166.90   21.49
  -2  -4  -6 1129.72   19.84
  -2   4  -6 1151.42   21.22
   2  -4   6 1125.31   21.57
  -2   4  -6 1174.09   22.21
  -2  -4  -6 1172.21   21.57
  -2   4  -6 1181.76   21.93
  -2   4  -7    2.27    0.70
  -2   4  -7    2.00    0.78
  -2  -4  -7    3.28    0.42
  -2   4  -7    2.76    0.81
  -2   4  -7    2.81    0.87
  -2  -4  -7    4.03    0.89
   2  -4   7    2.55    0.71
  -2  -4  -7    2.32    0.74
  -2   4  -7    4.58    1.04
  -2  -4  -7    3.39    0.89
  -2   4  -7    2.08    0.68
  -2  -4  -7    3.74    0.53
  -2  -4  -8  443.21   10.27
  -2   4  -8  417.31   10.69
  -2   4  -8  449.34   10.77
  -2   4  -8  408.60   10.29
   2  -4   8  415.90   10.20
  -2  -4  -8  412.48    8.62
  -2   4  -8  435.05    9.56
  -2   4  -8  438.88    9.59
  -2  -4  -8  429.61   10.18
  -2  -4  -8  443.73   10.22
  -2   4  -8  444.14   10.71
  -2  -4  -9   26.00    2.10
  -2   4  -9   24.75    2.13
  -2   4  -9   30.53    2.41
  -2   4  -9   26.66    1.74
  -2   4  -9   28.53    2.35
  -2  -4  -9   27.33    2.08
  -2  -4  -9   26.30    2.09
  -2   4  -9   27.63    1.75
  -2  -4  -9   24.27    1.43
  -2   4  -9   28.70    2.32
  -2   4 -10    3.07    1.01
  -2   4 -10    2.73    1.01
  -2  -4 -10    5.09    1.11
  -2  -4 -10    2.55    0.98
  -2   4 -10    5.00    1.27
  -2  -4 -10    4.51    1.16
  -2  -4 -11  139.07    5.48
  -2   4 -11  138.65    5.50
  -2   4 -11  142.08    5.80
  -2   4 -11  135.92    5.64
  -2  -4 -12  118.32    5.13
  -2   4 -12  105.97    5.07
  -2   4 -12  117.92    5.11
  -2   4 -12  107.96    5.13
  -2   4 -13    9.34    1.63
  -2  -4 -13    7.84    1.64
  -2   4 -13    8.34    1.51
  -2   4 -13   10.63    1.67
  -2   4 -13    8.04    1.71
  -2   4 -14  132.55    5.61
  -2   4 -14  122.40    5.19
  -2   4 -14  124.57    5.44
  -2   4 -14  117.29    5.29
  -2   4 -15    7.66    1.44
  -2  -4 -15    8.70    1.59
  -2   4 -15   10.13    1.51
   2  -4  15    8.53    1.99
   2   4  15    9.41    2.20
  -2   4 -15    9.06    1.62
   2   4  16  158.70    7.20
  -2   4 -16  145.68    5.27
   2  -4  16  156.23    6.69
  -2  -4 -16  166.77    5.95
  -2   4 -16  161.47    5.72
   2   4  17    0.46    0.97
   2  -4  17    0.64    0.82
  -2  -4 -17    0.38    0.78
  -2   4 -17    1.15    0.77
  -2  -4 -17    0.45    0.53
  -2  -4 -18   45.46    2.41
   2   4  18   43.52    2.71
   2  -4  18   37.87    2.38
  -2   4 -18   42.42    2.16
   2  -5 -18   16.75    1.38
   2  -5 -18   25.04    1.77
  -2   5  18   21.23    1.88
  -2  -5  18   20.60    1.52
  -2   5  17  655.53   15.15
   2  -5 -17  641.08   13.79
   2  -5 -17  641.02   14.02
  -2  -5  17  625.42   13.87
   2   5 -17  671.27   14.56
   2  -5 -16   37.97    2.62
  -2  -5  16   35.75    2.44
   2  -5 -16   39.24    2.69
  -2  -5  16   32.96    2.52
   2   5 -16   36.91    2.87
  -2   5  16   37.07    3.10
   2   5 -15  576.91   15.15
  -2   5  15  614.49   15.81
   2  -5 -15  570.83   13.89
   2  -5 -15  620.45   14.23
  -2  -5  15  581.71   14.00
  -2  -5  15  599.97   14.39
   2  -5 -15  612.84   14.14
   2   5 -15  603.53   14.61
   2  -5 -14  504.50   12.48
   2  -5 -14  473.83   12.23
  -2  -5  14  473.69   12.62
   2   5 -14  482.39   13.34
   2   5 -14  509.94   12.98
  -2  -5  14  484.23   12.66
  -2   5  14  515.60   14.28
   2  -5 -14  483.75   12.31
   2   5 -13   19.45    2.40
  -2  -5  13   15.57    2.05
   2  -5 -13   14.30    1.88
   2  -5 -13   16.43    1.88
  -2  -5  13   14.65    2.00
  -2   5  13   12.84    2.22
   2  -5 -13   16.01    1.96
   2   5 -13   15.74    2.19
   2   5 -12   19.42    1.80
   2  -5 -12   18.62    2.05
  -2  -5  12   20.35    2.22
  -2   5  12   21.68    2.79
   2   5 -12   20.03    2.35
   2   5 -12   21.56    2.38
   2   5 -12   20.54    1.84
  -2  -5  12   22.74    2.44
   2  -5 -12   22.18    2.15
   2   5 -11  367.21   10.57
   2  -5 -11  365.31    9.73
   2  -5 -11  349.29    9.69
   2   5 -11  340.42    9.35
  -2  -5  11  355.59   10.16
   2   5 -11  342.36    9.31
   2   5 -11  367.28   10.11
  -2  -5  11  354.35   10.46
  -2   5  11  377.51   11.92
   2  -5 -10  310.23    8.68
   2  -5 -10  301.85    8.43
   2   5 -10  286.10    8.36
   2   5 -10  300.71    9.12
  -2  -5  10  304.52    8.91
   2   5 -10  300.53    8.49
   2   5 -10  288.09    8.55
  -2  -5  10  305.19    9.24
  -2   5  10  307.68   10.37
   2  -5  -9    0.90    0.85
  -2  -5   9    0.07    0.83
  -2   5   9    0.77    1.02
   2   5  -9    0.70    0.93
   2  -5  -9    0.14    0.82
  -2  -5   9    0.82    0.86
   2   5  -9    1.57    0.97
   2   5  -9    0.27    0.84
   2   5  -9    0.63    0.93
   2   5  -8  151.14    5.54
   2  -5  -8  149.13    5.38
   2   5  -8  150.45    5.23
   2   5  -8  155.66    5.61
  -2  -5   8  148.37    5.37
  -2  -5   8  143.55    5.58
   2   5  -8  151.01    5.52
   2  -5  -8  156.35    5.24
   2   5  -7 2180.50   39.41
   2  -5  -7 2154.47   39.06
   2   5  -7 2191.86   39.45
  -2  -5   7 2156.14   38.80
   2   5  -7 2110.60   38.37
   2   5  -7 2187.16   39.10
  -2  -5   7 2175.45   39.49
   2  -5  -7 2062.65   39.36
   2   5  -6  393.45    9.18
  -2  -5   6  399.11    9.81
   2   5  -6  408.35   10.28
   2   5  -6  411.19    9.76
   2   5  -6  411.26   10.29
  -2  -5   6  394.45    9.51
  -2  -5   6  415.09   10.17
   2  -5  -6  390.82    8.72
   2  -5  -6  381.98    9.96
   2  -5  -5 5369.38   89.78
  -2  -5   5 5465.54   89.66
  -2  -5   5 5255.90   89.21
  -2   5   5 5285.14   87.89
  -2  -5   5 5254.00   88.88
  -2   5   5 5248.87   87.90
   2   5  -5 5172.94   88.29
   2   5  -4   18.49    1.62
   2   5  -4   18.62    1.54
   2   5  -4   20.57    1.92
  -2   5   4   21.17    1.89
   2   5  -4   19.52    1.89
  -2  -5   4   15.78    1.45
  -2   5   4   15.77    1.27
  -2  -5   4   16.30    1.44
   2   5  -4   16.62    1.27
  -2   5   4   16.41    1.28
  -2   5   3  629.31   13.38
  -2   5   3  612.53   12.35
  -2   5   3  603.87   13.29
  -2  -5   3  610.69   12.61
   2   5  -3  615.80   13.43
  -2  -5   3  618.84   12.76
  -2   5   3  626.10   12.38
   2   5  -3  626.58   13.49
   2   5  -3  626.98   12.59
   2   5  -3  624.61   13.04
  -2   5   2  764.45   15.69
  -2  -5   2  760.78   14.92
   2   5  -2  776.87   14.76
  -2   5   2  782.84   16.52
  -2   5   2  791.23   15.73
   2   5  -2  763.64   15.76
  -2   5   2  752.70   14.79
  -2  -5   2  744.49   14.90
   2   5  -2  763.56   15.16
   2   5  -2  768.86   15.81
  -2  -5   2  755.03   15.36
  -2   5   2  756.51   14.82
   2  -5  -2  773.54   15.64
   2  -5  -2  770.48   16.49
   2  -5  -1  554.50   11.78
   2   5  -1  525.80   11.76
   2   5  -1  546.52   11.21
  -2   5   1  544.33   11.81
  -2  -5   1  521.95   11.07
  -2   5   1  564.94   12.33
   2   5  -1  531.52   11.78
  -2   5   1  534.56   11.13
  -2  -5   1  533.39   11.01
  -2   5   1  537.97   11.17
  -2   5   1  531.87   11.78
   2   5  -1  537.10   10.83
  -2  -5   1  533.01   11.45
   2  -5  -1  550.21   12.77
   2   5   0  545.63   11.12
  -2  -5   0  549.01   11.49
   2   5   0  537.31   10.74
   2  -5   0  555.66   11.88
  -2   5   0  548.17   12.07
   2   5   0  537.20   11.75
  -2  -5   0  543.60   10.99
  -2   5   0  534.16   11.31
  -2   5   0  561.02   11.95
   2   5   0  544.95   11.78
  -2   5   0  553.81   11.42
  -2  -5   0  544.57   11.22
  -2   5  -1   35.36    1.89
   2  -5   1   39.96    2.32
   2   5   1   36.81    1.74
  -2  -5  -1   38.59    2.11
  -2   5  -1   38.54    2.13
   2   5   1   37.79    1.88
  -2   5  -1   37.01    2.11
   2   5   1   36.89    2.18
  -2  -5  -1   38.05    2.03
  -2  -5  -1   39.74    1.88
  -2   5  -1   38.37    2.29
   2   5   1   39.35    2.23
   2  -5   2   18.52    1.62
   2   5   2   20.21    1.57
  -2   5  -2   17.09    1.53
   2   5   2   17.46    1.47
   2   5   2   18.14    1.21
  -2   5  -2   17.82    1.61
  -2   5  -2   19.30    1.57
   2  -5   2   18.65    1.65
  -2   5  -2   18.31    1.42
  -2  -5  -2   18.08    1.23
  -2  -5  -2   17.26    1.45
  -2  -5  -2   21.80    1.55
  -2  -5  -2   21.42    1.54
  -2   5  -2   19.91    1.57
  -2  -5  -3  444.25    9.73
  -2   5  -3  434.27   10.42
  -2  -5  -3  443.32    8.89
   2  -5   3  422.69   10.61
  -2   5  -3  435.25   10.05
  -2   5  -3  426.24    9.61
  -2  -5  -3  436.89    8.85
  -2  -5  -3  440.54    9.63
  -2  -5  -3  438.20    9.26
   2  -5   3  441.23   10.14
  -2  -5  -4   95.23    3.30
  -2   5  -4  103.14    3.82
  -2   5  -4   99.01    3.83
   2  -5   4  102.57    4.47
  -2   5  -4  101.21    3.76
  -2  -5  -4  100.38    3.13
  -2   5  -4  101.86    4.17
  -2  -5  -4  101.35    3.66
   2  -5   4  100.07    3.91
  -2  -5  -4   97.28    3.58
  -2   5  -4  105.05    3.79
  -2  -5  -4   96.27    2.94
  -2  -5  -4   93.05    2.86
  -2   5  -5  896.79   18.68
  -2  -5  -5  903.11   17.70
  -2  -5  -5  907.24   17.28
  -2   5  -5  909.34   18.09
  -2  -5  -5  899.39   16.25
  -2   5  -5  904.64   17.80
  -2  -5  -5  943.76   17.78
   2  -5   5  887.64   18.10
  -2  -5  -5  883.61   16.33
  -2   5  -5  885.95   17.94
  -2   5  -5  933.68   17.94
  -2  -5  -5  887.39   16.29
   2  -5   5  884.93   19.43
  -2   5  -6   21.49    1.87
  -2   5  -6   23.45    2.06
  -2   5  -6   25.57    2.00
   2  -5   6   20.76    1.80
  -2  -5  -6   19.46    1.15
  -2  -5  -6   24.16    1.83
  -2   5  -6   25.12    1.87
  -2   5  -6   26.36    1.88
  -2  -5  -6   18.45    1.54
  -2   5  -6   24.51    2.15
  -2  -5  -6   21.80    1.74
  -2  -5  -6   20.69    1.15
  -2   5  -7  234.16    6.55
  -2  -5  -7  234.60    6.70
  -2   5  -7  216.52    6.78
  -2   5  -7  236.94    7.49
  -2  -5  -7  241.99    6.75
  -2   5  -7  234.22    6.54
  -2  -5  -7  223.77    5.27
  -2  -5  -7  242.13    6.69
  -2   5  -7  237.54    7.11
  -2   5  -7  237.01    7.27
  -2  -5  -8   28.35    2.13
  -2  -5  -8   32.94    2.30
  -2  -5  -8   30.12    2.20
  -2   5  -8   30.82    2.34
  -2   5  -8   30.37    2.51
  -2   5  -8   30.54    2.08
  -2   5  -8   30.14    2.08
  -2   5  -8   31.27    2.49
  -2   5  -8   30.65    2.48
  -2  -5  -9 3588.58   62.08
  -2  -5  -9 3698.87   62.21
  -2   5  -9 3505.86   61.03
  -2   5  -9 3490.63   62.33
  -2   5  -9 3616.63   63.11
  -2   5  -9 3560.27   61.07
  -2  -5  -9 3483.52   61.79
  -2   5  -9 3495.30   62.63
  -2   5  -9 3521.27   63.23
  -2  -5 -10   64.51    3.38
  -2   5 -10   59.56    3.77
  -2  -5 -10   65.57    3.58
  -2   5 -10   56.62    2.80
  -2   5 -10   58.96    3.68
  -2   5 -10   67.57    3.65
  -2  -5 -10   65.88    3.56
  -2   5 -10   64.20    3.86
  -2   5 -10   60.63    2.89
  -2  -5 -11 1296.06   25.71
  -2   5 -11 1245.75   25.58
  -2  -5 -11 1336.20   25.91
   2  -5  11 1296.71   28.90
  -2   5 -11 1252.47   26.38
  -2   5 -11 1244.88   26.33
  -2   5 -11 1270.69   26.15
  -2  -5 -12   13.94    1.97
   2  -5  12   14.24    2.64
  -2   5 -12   13.35    1.83
  -2   5 -12   15.10    2.16
  -2   5 -12   14.72    2.05
  -2  -5 -12   12.17    1.83
  -2   5 -12   13.04    1.91
  -2   5 -13 1383.73   29.44
  -2  -5 -13 1524.32   29.33
  -2   5 -13 1455.31   29.54
  -2  -5 -13 1541.48   29.36
  -2   5 -13 1429.86   28.71
  -2   5 -14    9.17    1.58
  -2   5 -14    9.39    1.47
  -2   5 -14    8.08    1.48
   2   5  15  184.35    8.37
  -2   5 -15  185.67    6.51
  -2   5 -15  185.66    6.01
  -2   5 -15  174.51    6.18
  -2   5 -16   27.25    2.20
   2  -5  16   29.46    2.67
   2   5  16   25.62    2.81
   2   5  17  165.82    6.08
  -2   5 -17  164.98    5.03
   2  -5  17  153.24    5.51
   2  -6 -18  215.88    5.63
   2   6 -18  209.94    5.83
   2  -6 -17   37.74    2.11
   2  -6 -17   45.88    2.54
  -2   6  17   43.33    2.65
   2   6 -17   48.03    2.75
   2  -6 -16   25.47    1.94
   2   6 -16   23.65    2.20
  -2   6  16   22.81    2.21
  -2  -6  16   19.96    1.78
  -2  -6  16   23.04    1.86
   2  -6 -16   24.28    2.07
  -2  -6  15  284.59    8.23
   2   6 -15  286.71    8.60
  -2  -6  15  268.68    7.90
   2  -6 -15  286.62    8.29
  -2   6  15  273.41    9.00
   2  -6 -15  284.18    8.08
   2  -6 -14  184.82    6.42
  -2  -6  14  193.72    6.85
   2  -6 -14  200.14    6.78
  -2   6  14  185.97    7.47
   2  -6 -14  183.41    6.38
  -2  -6  14  182.63    6.44
   2   6 -14  181.66    6.87
   2   6 -14  185.87    7.34
   2   6 -13  341.95   10.55
   2  -6 -13  356.91    9.79
   2  -6 -13  337.53    9.48
   2  -6 -13  341.84    9.48
   2   6 -13  302.53    8.19
  -2  -6  13  329.51    9.49
  -2   6  13  340.60   10.96
   2   6 -13  334.85    9.89
   2   6 -13  316.85    8.28
  -2  -6  13  336.59    9.98
  -2  -6  12  686.26   16.37
   2   6 -12  638.99   14.64
  -2   6  12  690.45   17.58
   2  -6 -12  676.54   15.49
   2   6 -12  657.85   14.75
  -2  -6  12  671.31   15.65
   2  -6 -12  689.15   15.78
   2   6 -12  685.46   16.76
   2   6 -12  681.58   15.94
   2  -6 -11    3.08    1.21
   2   6 -11    0.73    0.96
   2   6 -11    4.02    1.40
  -2  -6  11    0.89    0.92
  -2   6  11    0.97    1.16
   2  -6 -11    1.04    0.88
   2   6 -11   -0.15    0.90
   2   6 -11   -0.17    1.15
  -2  -6  11    0.19    0.94
   2  -6 -10  561.11   13.58
   2  -6 -10  594.97   13.61
  -2   6  10  562.35   15.31
   2   6 -10  551.82   13.51
  -2  -6  10  546.64   13.49
   2   6 -10  577.16   14.46
   2   6 -10  565.19   13.51
  -2  -6  10  581.18   14.44
   2   6 -10  561.76   13.59
  -2  -6   9  696.74   16.48
   2  -6  -9  711.28   15.97
   2   6  -9  726.83   16.09
  -2   6   9  673.51   17.40
   2   6  -9  711.18   16.04
   2   6  -9  721.19   16.59
   2   6  -9  703.20   15.71
   2  -6  -9  724.89   15.81
  -2  -6   9  690.22   15.74
   2   6  -8  536.94   13.00
   2  -6  -8  523.01   12.30
   2   6  -8  528.22   12.97
   2  -6  -8  532.96   12.77
  -2  -6   8  509.59   12.33
   2   6  -8  514.32   12.90
   2   6  -8  530.26   12.31
  -2  -6   8  525.79   13.15
   2   6  -7   82.88    4.13
   2   6  -7   74.32    3.46
   2   6  -7   89.15    4.11
   2  -6  -7   77.85    3.91
  -2  -6   7   83.47    4.13
   2   6  -7   81.07    4.07
  -2  -6   7   73.53    3.56
   2  -6  -7   77.42    3.61
  -2  -6   6    8.23    1.37
   2  -6  -6    8.59    1.49
   2   6  -6    8.71    1.53
   2   6  -6    8.60    1.32
  -2  -6   6    7.79    1.20
   2   6  -6    8.48    1.15
   2   6  -6    7.80    1.48
   2   6  -5  217.19    6.44
  -2  -6   5  201.51    6.46
  -2   6   5  211.76    5.65
   2  -6  -5  202.86    6.73
  -2   6   5  209.57    5.61
   2   6  -5  199.15    5.64
  -2  -6   5  204.95    6.08
   2  -6  -4   68.24    3.50
   2   6  -4   70.27    3.24
  -2   6   4   68.09    3.56
  -2  -6   4   64.79    3.23
  -2   6   4   72.92    2.94
  -2  -6   4   68.09    3.09
   2   6  -4   68.45    3.57
   2   6  -4   69.93    3.60
  -2   6   4   71.34    2.92
  -2   6   3  214.56    6.70
  -2   6   3  207.23    6.67
   2   6  -3  216.94    6.06
   2   6  -3  219.89    6.72
  -2  -6   3  203.25    6.13
  -2   6   3  204.91    5.75
  -2  -6   3  220.49    6.46
   2   6  -3  225.67    6.79
  -2  -6   3  208.93    5.92
  -2   6   3  204.83    5.73
   2   6  -2  490.22   10.95
  -2   6   2  504.85   11.94
  -2   6   2  527.43   12.09
  -2   6   2  515.17   11.10
  -2  -6   2  488.62   11.14
   2   6  -2  515.64   11.91
  -2  -6   2  525.74   11.63
   2   6  -2  519.33   11.92
  -2   6   2  512.11   11.09
  -2  -6   2  508.38   11.08
  -2   6   1  217.87    6.61
   2   6  -1  217.58    5.79
  -2  -6   1  202.08    5.86
   2   6  -1  213.51    6.10
  -2   6   1  222.14    6.75
  -2   6   1  219.34    6.04
   2   6  -1  218.17    6.55
   2  -6  -1  211.15    6.51
  -2   6   1  218.07    7.14
  -2  -6   1  214.59    5.89
  -2   6   1  222.42    6.10
  -2   6   1  212.67    5.47
   2  -6  -1  208.91    5.50
   2   6  -1  216.56    6.51
  -2  -6   1  220.80    6.30
  -2  -6   0   79.50    3.39
  -2   6   0   78.25    3.66
  -2  -6   0   78.21    3.16
   2  -6   0   78.35    3.65
  -2  -6   0   77.51    3.18
   2   6   0   88.09    3.71
  -2   6   0   80.64    3.92
  -2   6   0   81.27    3.37
  -2   6   0   80.17    3.01
   2   6   0   81.69    3.28
   2   6   0   87.27    3.68
  -2   6   0   85.12    3.45
   2  -6   0   82.03    3.20
  -2   6   0   81.26    3.73
   2   6   0   84.30    3.13
   2   6   1   10.05    1.06
  -2   6  -1   10.50    1.45
   2   6   1   10.74    1.35
  -2   6  -1   12.87    1.24
  -2  -6  -1    8.91    1.05
  -2   6  -1    7.49    1.30
  -2   6  -1    8.92    1.22
  -2  -6  -1    9.61    1.22
  -2  -6  -1   10.24    1.20
  -2   6  -1    8.80    1.23
   2   6   1    9.18    1.06
   2  -6   1    8.67    1.14
   2   6   1   10.35    1.33
   2  -6   1    8.70    1.26
  -2  -6  -2 2138.29   37.53
  -2  -6  -2 2171.08   37.87
  -2   6  -2 2140.37   38.57
   2  -6   2 2074.78   38.24
   2   6   2 2156.24   37.70
   2  -6   2 2105.77   38.52
  -2   6  -2 2068.95   37.32
  -2   6  -2 2153.20   38.00
  -2  -6  -2 2036.29   36.32
  -2  -6  -2 2135.37   37.98
   2   6   2 2190.84   37.16
  -2  -6  -2 2027.06   36.92
  -2   6  -2 2108.97   37.97
   2   6   2 2195.57   37.77
  -2   6  -2 2191.33   38.70
   2  -6   3  753.97   16.20
  -2   6  -3  760.14   16.12
  -2  -6  -3  735.40   14.45
   2  -6   3  778.49   16.43
  -2  -6  -3  746.96   14.59
  -2   6  -3  708.01   15.15
   2   6   3  753.93   15.07
  -2   6  -3  788.89   16.36
  -2  -6  -3  741.27   15.20
  -2  -6  -3  775.28   15.61
  -2  -6  -3  748.15   14.61
  -2  -6  -3  780.10   15.41
   2   6   3  767.20   15.10
  -2  -6  -4  787.30   15.55
  -2  -6  -4  787.62   15.12
  -2  -6  -4  795.32   16.36
  -2   6  -4  792.61   16.80
  -2   6  -4  842.75   16.77
   2  -6   4  786.90   16.97
  -2  -6  -4  783.07   15.18
  -2   6  -4  806.54   16.36
  -2   6  -4  839.26   16.71
   2  -6   4  809.64   17.62
  -2   6  -4  763.46   17.26
  -2  -6  -4  804.01   16.18
  -2  -6  -5    8.91    0.89
  -2   6  -5    9.21    1.38
   2  -6   5    9.97    1.63
  -2   6  -5   10.59    1.46
  -2  -6  -5   10.16    1.31
  -2   6  -5   10.93    1.39
  -2  -6  -5    8.34    1.19
  -2   6  -5    9.29    1.32
  -2  -6  -6  174.45    5.36
   2  -6   6  162.19    6.79
  -2   6  -6  169.47    5.88
  -2  -6  -6  154.14    4.27
  -2   6  -6  176.54    5.75
  -2  -6  -6  171.70    5.61
  -2   6  -6  177.90    5.81
  -2   6  -6  180.51    5.89
  -2  -6  -6  179.43    5.64
  -2   6  -7   68.02    3.85
  -2   6  -7   64.87    3.86
  -2  -6  -7   72.52    3.38
  -2   6  -7   69.62    3.43
  -2  -6  -7   74.34    3.50
  -2   6  -7   69.98    3.64
  -2  -6  -7   70.20    3.45
   2  -6   7   69.66    4.43
  -2   6  -7   68.83    3.60
  -2   6  -7   70.42    3.48
  -2   6  -8    8.53    1.64
  -2  -6  -8    8.30    1.37
  -2  -6  -8    7.89    1.30
  -2   6  -8   10.45    1.39
  -2   6  -8    8.42    1.45
   2  -6   8    8.87    1.90
  -2  -6  -8   10.08    1.44
  -2   6  -8    9.85    1.67
  -2   6  -8    9.67    1.38
  -2   6  -8    9.26    1.53
  -2  -6  -9   25.53    2.27
  -2   6  -9   28.96    2.66
  -2   6  -9   25.83    2.29
  -2   6  -9   27.32    2.53
  -2  -6  -9   26.60    2.22
  -2  -6  -9   24.55    2.13
  -2   6  -9   25.36    2.06
   2  -6   9   25.82    2.99
  -2   6  -9   23.41    2.00
  -2   6  -9   23.40    2.48
  -2   6 -10   17.56    1.96
  -2   6 -10   16.61    1.65
  -2  -6 -10   17.95    2.04
  -2  -6 -10   15.63    1.88
  -2   6 -10   14.00    2.01
  -2   6 -10   19.00    2.22
   2  -6  10   16.06    2.55
  -2   6 -10   16.18    1.62
  -2   6 -10   16.86    2.12
  -2  -6 -10   15.69    1.73
  -2   6 -11    0.64    0.61
  -2  -6 -11    3.67    1.24
  -2   6 -11    1.81    0.98
  -2  -6 -11    2.87    1.16
  -2   6 -11    4.12    1.18
  -2   6 -11    0.37    0.59
  -2   6 -11    1.28    1.22
  -2   6 -12  632.65   15.93
  -2  -6 -12  668.39   15.38
  -2   6 -12  630.54   14.94
  -2  -6 -12  661.06   15.44
   2  -6  12  652.79   17.68
  -2   6 -12  664.61   15.80
  -2   6 -13    6.95    1.59
  -2  -6 -13    6.00    1.49
  -2  -6 -13    7.79    1.55
  -2   6 -13    6.15    1.26
  -2   6 -13    5.74    1.35
   2  -6  13   11.23    2.20
  -2  -6 -14  119.67    5.05
  -2   6 -14  113.34    5.07
  -2  -6 -15    9.28    1.46
   2   6  15    6.00    1.79
  -2  -6 -16  146.84    4.99
   2  -6  16  132.88    5.38
   2   6  16  140.84    6.01
  -2  -6 -17   24.69    1.73
   2  -6  17   21.81    1.78
   2   6  17   24.57    2.08
  -2   6 -17   22.14    1.66
   2  -7 -17  127.70    4.19
   2   7 -17  127.26    4.26
   2  -7 -16   16.60    1.65
  -2  -7  16   13.00    1.31
   2   7 -16   12.83    1.54
  -2   7  16   13.03    1.41
   2  -7 -16   13.04    1.27
   2  -7 -15   15.34    1.77
   2  -7 -15   15.16    1.53
   2   7 -15   15.40    1.81
  -2   7  15   14.71    1.75
  -2  -7  15   13.63    1.59
   2  -7 -14  511.72   12.26
  -2   7  14  474.98   12.47
  -2  -7  14  500.72   12.34
  -2  -7  14  470.41   11.30
   2  -7 -14  496.79   11.73
   2   7 -14  488.96   12.27
   2  -7 -13  118.17    4.82
  -2   7  13  107.03    5.27
   2  -7 -13  125.13    5.15
  -2  -7  13  128.56    5.43
   2   7 -13  111.07    5.49
   2   7 -13  103.17    4.09
  -2  -7  13  107.19    4.54
   2   7 -13  114.98    5.07
   2  -7 -13  103.22    4.55
   2   7 -13  102.49    4.09
   2  -7 -12    9.14    1.65
  -2  -7  12    8.29    1.66
   2   7 -12    8.18    1.59
   2   7 -12    8.11    1.33
   2   7 -12   10.90    1.82
  -2   7  12    8.46    1.75
   2   7 -12    7.64    1.31
  -2  -7  12    8.40    1.40
   2  -7 -12    9.10    1.43
   2  -7 -11    5.81    1.27
   2  -7 -11    4.75    1.34
   2   7 -11    6.13    1.54
  -2   7  11    5.84    1.57
   2   7 -11    4.67    1.23
   2   7 -11    6.85    1.58
  -2  -7  11    5.66    1.52
  -2  -7  11    6.31    1.28
   2   7 -11    4.34    1.20
   2  -7 -10 1385.58   27.78
   2   7 -10 1404.01   27.74
   2   7 -10 1421.54   28.93
   2  -7 -10 1428.17   27.94
   2   7 -10 1400.60   27.84
  -2  -7  10 1376.56   27.42
  -2   7  10 1375.42   29.32
  -2  -7  10 1423.79   28.86
   2   7 -10 1425.76   27.91
  -2  -7   9   19.22    1.95
   2  -7  -9   21.71    2.20
  -2  -7   9   19.72    2.26
   2   7  -9   23.05    2.32
  -2   7   9   20.46    2.38
   2   7  -9   24.79    2.40
   2   7  -9   21.22    2.32
   2  -7  -9   21.05    2.15
   2   7  -9   19.21    2.00
  -2  -7   8   21.98    2.39
   2  -7  -8   22.87    2.23
  -2   7   8   20.62    2.33
  -2  -7   8   20.75    2.00
   2   7  -8   22.44    2.37
   2   7  -8   26.04    2.47
   2   7  -8   22.74    2.37
   2   7  -8   24.77    2.16
   2  -7  -7   67.52    3.80
  -2   7   7   57.37    3.60
   2   7  -7   63.60    3.88
   2   7  -7   66.86    3.96
  -2  -7   7   70.02    3.51
   2   7  -7   64.72    3.27
   2   7  -7   67.26    3.81
   2  -7  -6  280.44    8.59
   2   7  -6  256.79    7.18
   2   7  -6  280.93    8.29
  -2  -7   6  274.84    7.71
  -2   7   5    3.17    0.79
   2   7  -5    2.37    1.13
   2  -7  -5    3.00    1.16
   2   7  -5    3.54    1.04
   2   7  -5    2.86    1.23
  -2   7   5    3.09    0.77
  -2  -7   5    3.40    0.92
   2   7  -4  274.37    8.25
   2   7  -4  271.87    8.22
  -2  -7   4  279.79    8.13
  -2   7   4  265.49    7.12
  -2   7   4  263.21    7.08
  -2  -7   4  266.10    7.34
   2   7  -4  266.38    7.67
  -2  -7   3   34.39    2.22
   2   7  -3   32.10    2.25
  -2   7   3   30.43    2.52
   2   7  -3   37.13    2.72
  -2   7   3   29.23    2.51
  -2  -7   3   35.12    2.53
   2   7  -3   41.06    2.81
  -2   7   3   34.53    2.21
  -2   7   3   34.43    2.21
  -2  -7   2    5.66    1.17
  -2   7   2    5.66    1.06
  -2   7   2    5.81    1.26
   2   7  -2    7.34    1.40
  -2  -7   2    4.62    0.93
   2   7  -2    5.96    1.29
   2   7  -2    6.49    1.04
  -2   7   2    4.67    1.01
  -2  -7   2    5.20    1.01
  -2   7   2    5.86    1.34
  -2   7   1   18.91    1.98
  -2  -7   1   19.18    1.82
  -2   7   1   18.05    1.71
   2   7  -1   19.31    1.66
  -2  -7   1   20.28    1.69
  -2   7   1   18.51    2.02
   2   7  -1   18.52    1.94
  -2   7   1   19.91    1.75
  -2  -7   1   18.45    1.68
   2  -7  -1   17.77    1.46
   2   7  -1   17.28    1.85
  -2   7   0  643.21   14.69
  -2   7   0  633.52   15.34
  -2   7   0  644.33   13.86
  -2  -7   0  590.70   13.35
   2   7   0  628.36   14.03
  -2   7   0  650.21   14.70
   2   7   0  637.84   13.39
   2  -7   0  601.76   13.16
   2   7   0  633.13   13.36
  -2  -7   0  633.34   13.37
   2   7   0  630.00   14.02
  -2  -7   0  650.13   13.97
  -2   7   0  600.93   12.75
   2  -7   1  675.28   14.47
  -2   7  -1  700.19   15.65
  -2   7  -1  701.72   15.63
  -2   7  -1  678.84   16.00
   2   7   1  697.95   14.24
  -2  -7  -1  679.15   14.77
   2   7   1  674.21   14.70
  -2   7  -1  697.26   14.83
  -2  -7  -1  644.00   14.06
   2   7   1  683.29   14.73
  -2  -7  -1  676.24   14.24
  -2   7  -1  669.81   14.73
  -2   7  -1  656.90   13.82
  -2   7  -2  149.58    5.74
  -2  -7  -2  144.34    5.21
   2   7   2  150.86    5.08
  -2  -7  -2  135.78    4.65
  -2   7  -2  165.43    6.13
   2   7   2  143.72    5.01
  -2   7  -2  156.53    5.41
   2   7   2  154.02    4.90
  -2   7  -2  158.99    5.46
   2  -7   2  151.46    5.35
  -2  -7  -2  148.44    4.96
  -2   7  -2  147.63    4.85
  -2  -7  -3    2.88    0.89
  -2  -7  -3    4.43    0.78
  -2  -7  -3    4.11    0.93
  -2   7  -3    4.54    1.15
  -2  -7  -3    2.57    0.62
  -2  -7  -3    2.74    0.71
  -2   7  -3    2.27    0.98
  -2   7  -3    5.56    1.18
  -2   7  -3    2.69    1.10
   2  -7   3    2.87    0.97
  -2   7  -3    2.68    0.85
  -2  -7  -4  310.58    7.79
  -2  -7  -4  316.39    7.63
  -2  -7  -4  339.30    8.79
   2  -7   4  334.30    9.59
  -2   7  -4  333.98    9.39
  -2   7  -4  335.08    9.61
  -2   7  -4  320.84    8.53
  -2  -7  -4  341.52    8.59
   2  -7   5  355.23   10.37
  -2  -7  -5  344.03    8.46
  -2   7  -5  351.98    9.72
  -2   7  -5  352.66    9.53
  -2   7  -5  345.01    9.46
  -2  -7  -5  341.13    9.15
  -2   7  -5  331.82    9.08
  -2  -7  -5  359.04    9.07
  -2   7  -6   29.27    2.48
  -2  -7  -6   30.14    2.33
  -2  -7  -6   29.74    2.12
  -2   7  -6   35.00    2.56
   2  -7   6   34.18    3.01
  -2   7  -6   30.03    2.41
  -2  -7  -6   35.75    2.45
  -2   7  -7  547.23   13.10
  -2  -7  -7  564.47   12.66
  -2   7  -7  538.27   13.33
  -2   7  -7  543.14   13.02
  -2  -7  -7  534.82   12.83
  -2  -7  -7  559.76   12.90
   2  -7   7  571.64   14.90
  -2   7  -7  531.35   13.06
  -2  -7  -8    4.14    1.16
  -2  -7  -8    2.00    0.94
  -2   7  -8    1.13    0.97
  -2  -7  -8    1.14    0.78
  -2   7  -8    1.40    1.08
  -2   7  -8    1.38    0.96
  -2   7  -8    2.53    1.16
   2  -7   8    3.03    1.48
  -2   7  -8    2.11    0.97
  -2  -7  -9   42.52    2.80
  -2  -7  -9   46.57    3.00
  -2   7  -9   40.91    3.27
  -2   7  -9   44.06    2.83
   2  -7   9   48.48    3.91
  -2   7  -9   42.99    2.81
  -2  -7  -9   46.40    3.08
  -2   7  -9   46.26    3.08
  -2   7  -9   45.93    3.23
   2  -7  10   48.26    3.98
  -2   7 -10   51.93    3.70
  -2  -7 -10   60.24    3.53
  -2   7 -10   49.60    3.22
  -2   7 -10   51.63    2.97
  -2   7 -10   51.54    2.96
  -2   7 -10   52.35    3.53
  -2  -7 -10   53.62    3.25
  -2  -7 -10   48.85    2.98
  -2   7 -11    0.40    0.60
  -2   7 -11    0.38    0.82
  -2  -7 -11    1.21    1.01
  -2  -7 -11    1.27    0.99
   2  -7  11    0.99    1.47
  -2   7 -11    0.72    1.21
  -2   7 -11   -0.31    1.00
  -2   7 -11    0.06    0.60
  -2   7 -12   92.43    4.88
  -2  -7 -12  110.21    4.89
   2  -7  12   97.30    5.50
  -2  -7 -12   96.92    4.50
  -2   7 -12   98.88    4.83
  -2  -7 -13   63.75    3.55
   2  -7  13   63.80    4.27
  -2   7 -13   66.78    3.77
  -2   7 -14   28.46    2.39
   2  -7  14   31.11    2.80
   2   7  14   28.21    3.21
  -2  -7 -14   26.74    2.19
  -2   7 -15  120.88    4.60
  -2  -7 -15  121.05    4.41
  -2  -7 -16   25.88    1.78
   2   7  16   25.49    2.27
  -2   7 -16   27.20    1.92
   2   8 -16  118.48    3.97
   2  -8 -16  123.36    4.11
   2  -8 -15  111.72    4.19
  -2  -8  15  106.94    3.92
   2   8 -15  109.27    4.08
  -2  -8  14    3.06    0.93
   2  -8 -14    2.39    1.04
  -2   8  14    2.31    0.79
   2  -8 -14    3.32    0.85
   2   8 -14    2.76    1.05
   2   8 -13   12.50    1.35
   2  -8 -13   15.12    1.79
  -2   8  13   12.66    1.54
   2  -8 -13   13.46    1.59
  -2  -8  13   14.67    1.83
   2   8 -13   12.23    1.35
   2   8 -13   15.49    1.78
   2   8 -12  523.08   12.19
   2   8 -12  516.04   13.77
   2  -8 -12  540.16   12.95
   2   8 -12  537.22   12.29
  -2  -8  12  552.52   13.44
   2   8 -12  513.25   12.65
   2   8 -11  269.41    9.03
  -2   8  11  238.95    8.00
  -2  -8  11  268.14    8.72
   2   8 -11  266.81    8.02
   2  -8 -11  254.75    7.96
   2   8 -11  272.01    8.04
   2   8 -11  272.38    8.12
   2   8 -10  224.43    8.10
   2  -8 -10  213.68    7.29
  -2   8  10  213.79    7.46
  -2  -8  10  233.46    8.07
  -2  -8  10  224.60    6.88
   2   8 -10  229.40    7.52
   2   8 -10  220.03    7.12
   2   8 -10  222.01    7.44
  -2  -8   9   -0.20    1.11
   2   8  -9    0.20    0.85
   2   8  -9    1.23    1.14
   2  -8  -9    1.45    0.94
   2   8  -9    1.14    1.12
  -2  -8   9    1.49    0.88
   2   8  -9    0.35    0.87
   2   8  -8   16.68    2.12
   2   8  -8   15.75    2.12
   2  -8  -8   16.27    2.04
   2   8  -8   16.17    1.75
   2   8  -8   15.15    2.03
  -2  -8   8   14.18    1.64
   2   8  -7  458.56   12.20
   2   8  -7  433.15   10.53
   2  -8  -7  449.24   11.44
   2  -8  -7  439.95   11.97
  -2  -8   7  454.69   10.96
  -2  -8   6 1080.71   23.25
   2  -8  -6 1112.66   22.42
  -2  -8   6 1095.04   21.90
   2   8  -6 1118.82   23.24
  -2   8   5  154.40    5.22
   2   8  -5  161.14    6.11
   2   8  -5  179.20    6.68
   2  -8  -5  164.17    6.63
  -2   8   5  159.98    5.26
  -2  -8   5  160.22    6.27
  -2  -8   5  168.34    5.59
   2   8  -5  172.11    6.53
   2   8  -4   31.32    2.48
   2   8  -4   31.50    2.78
  -2   8   4   33.14    2.27
  -2  -8   4   33.26    2.73
  -2  -8   4   33.05    2.29
   2   8  -4   36.71    2.95
  -2   8   4   33.64    2.30
  -2   8   3   12.20    1.88
   2   8  -3   17.95    1.86
   2   8  -3   13.60    1.93
  -2   8   3   16.17    1.70
  -2   8   3   16.10    2.06
   2   8  -3   14.95    1.98
  -2  -8   3   17.45    1.69
  -2  -8   3   14.82    1.83
  -2   8   3   14.28    1.57
  -2   8   2  209.50    7.46
   2   8  -2  210.65    6.58
  -2  -8   2  202.37    6.81
   2   8  -2  194.51    6.84
   2   8  -2  193.13    6.83
  -2   8   2  204.15    7.36
  -2   8   2  192.27    6.30
  -2   8   2  197.01    6.36
  -2  -8   2  202.67    6.13
  -2   8   1 1084.69   23.42
   2  -8  -1 1064.34   21.07
   2   8  -1 1118.33   22.02
  -2   8   1 1127.84   23.60
   2   8  -1 1104.97   22.73
  -2   8   1 1126.34   22.22
  -2   8   1 1152.34   22.33
   2   8  -1 1110.09   22.04
  -2  -8   1 1097.96   21.54
  -2  -8   1 1100.86   22.50
   2   8  -1 1085.90   22.63
  -2   8   0   15.81    2.04
  -2   8   0   16.09    1.80
   2   8   0   16.69    1.67
   2  -8   0   13.39    1.47
   2   8   0   13.95    1.79
   2   8   0   15.22    1.61
  -2   8   0   15.18    2.01
  -2  -8   0   16.28    1.82
  -2  -8   0   17.65    1.66
   2   8   0   14.02    1.79
  -2   8   0   16.58    1.85
   2   8   1  237.64    7.31
  -2   8  -1  242.66    8.24
  -2  -8  -1  248.84    7.58
  -2   8  -1  244.11    8.25
  -2   8  -1  235.03    8.50
   2   8   1  247.49    7.13
   2   8   1  242.48    7.37
  -2   8  -1  248.00    7.56
   2  -8   1  237.81    7.13
  -2   8  -1  249.45    7.59
  -2  -8  -1  243.53    6.98
  -2   8  -2  606.92   13.33
   2  -8   2  604.40   14.07
  -2   8  -2  639.28   15.40
  -2  -8  -2  619.61   14.21
  -2   8  -2  636.19   15.37
  -2   8  -2  646.87   15.74
   2   8   2  607.54   13.76
  -2   8  -2  621.29   14.38
   2   8   2  610.05   13.78
  -2  -8  -2  614.81   13.59
  -2  -8  -3    7.01    0.94
  -2   8  -3    6.10    1.46
  -2  -8  -3    7.51    1.08
  -2   8  -3    7.27    1.46
  -2   8  -3    7.18    1.52
   2  -8   3    8.18    1.47
  -2  -8  -3    9.31    1.44
  -2  -8  -3    6.73    1.20
   2   8   3    6.25    1.08
  -2   8  -3    7.34    1.18
   2   8   3    6.03    1.10
  -2  -8  -4   29.27    1.93
  -2   8  -4   31.41    2.83
  -2   8  -4   33.25    2.83
   2  -8   4   32.73    2.72
  -2   8  -4   32.65    2.37
  -2  -8  -4   36.66    2.62
  -2  -8  -4   32.06    2.31
  -2   8  -5   26.88    2.61
  -2  -8  -5   24.19    1.83
  -2   8  -5   24.58    2.43
  -2  -8  -5   23.56    2.06
   2  -8   5   27.76    2.61
  -2  -8  -5   25.99    2.30
  -2   8  -5   23.93    2.14
  -2  -8  -6   77.44    3.50
  -2  -8  -6   78.42    3.81
  -2   8  -6   81.18    4.32
  -2   8  -6   75.30    4.03
   2  -8   6   82.15    4.66
  -2  -8  -6   74.58    3.84
  -2   8  -6   80.76    4.17
  -2   8  -6   75.94    3.90
  -2   8  -7   20.19    2.14
  -2  -8  -7   17.73    1.76
   2  -8   7   18.84    2.47
  -2   8  -7   19.25    2.12
  -2   8  -7   18.57    2.05
  -2  -8  -7   17.99    1.91
  -2  -8  -7   19.44    1.99
  -2   8  -7   18.56    2.03
  -2  -8  -8   29.14    2.42
  -2   8  -8   28.66    2.44
  -2   8  -8   31.24    2.55
  -2  -8  -8   31.01    2.34
  -2   8  -8   29.68    2.57
   2  -8   8   30.30    3.10
  -2   8  -8   30.24    2.59
  -2  -8  -8   31.29    2.43
   2  -8   9  133.68    6.42
  -2  -8  -9  137.51    5.39
  -2  -8  -9  136.14    5.19
  -2   8  -9  129.11    5.15
  -2   8  -9  123.08    5.26
  -2  -8  -9  134.54    5.11
  -2   8  -9  126.64    5.11
  -2   8  -9  128.33    5.47
  -2   8  -9  124.94    5.94
  -2  -8 -10  442.93   10.86
   2  -8  10  483.15   13.40
  -2  -8 -10  464.10   11.38
  -2   8 -10  443.71   10.97
  -2  -8 -10  473.47   11.70
  -2   8 -10  442.11   10.97
  -2   8 -10  446.43   12.65
  -2   8 -10  428.40   11.72
  -2   8 -11   47.04    2.64
  -2   8 -11   42.94    3.31
  -2  -8 -11   49.92    3.18
  -2  -8 -11   48.35    2.98
   2  -8  11   50.43    3.79
  -2   8 -11   41.25    2.48
  -2   8 -11   44.75    3.15
  -2  -8 -12   45.41    2.98
   2  -8  12   45.63    3.48
  -2  -8 -12   51.03    2.99
  -2   8 -12   46.00    3.07
   2  -8  13   76.54    4.18
  -2  -8 -13   76.03    3.54
  -2   8 -13   75.68    3.78
  -2  -8 -14  106.81    4.00
   2   8  14  111.76    5.48
   2  -8  14  117.04    4.83
  -2   8 -14  106.88    4.30
   2   8  15   36.96    2.63
  -2  -8 -15   36.96    2.03
   2  -8  15   39.78    2.43
  -2   8 -15   40.13    2.30
   2  -9 -15  152.70    4.56
  -2  -9  15  144.21    4.24
  -2  -9  14   25.61    1.86
   2   9 -14   23.82    1.69
   2  -9 -13  190.41    5.48
   2   9 -13  191.47    5.72
   2   9 -13  180.26    5.16
   2   9 -13  175.89    5.13
   2   9 -12  131.32    4.69
  -2  -9  12  134.67    5.31
   2   9 -12  132.79    4.74
   2   9 -12  130.74    4.70
   2   9 -11   35.31    2.41
   2   9 -11   35.56    2.57
  -2  -9  11   36.20    2.83
   2   9 -11   37.80    2.63
   2   9 -10  107.11    5.24
  -2  -9  10  110.02    5.10
   2  -9 -10   95.00    4.43
   2   9 -10  106.49    4.77
   2  -9 -10  106.00    4.69
   2   9 -10  102.42    4.22
   2   9 -10  107.54    4.78
   2  -9  -9   25.34    2.34
   2   9  -9   23.68    1.97
   2  -9  -9   23.28    2.25
   2   9  -9   23.31    2.34
   2   9  -9   22.20    2.41
   2   9  -9   24.42    2.37
   2   9  -8   56.81    3.77
   2  -9  -8   61.14    3.69
   2   9  -8   57.19    3.68
   2   9  -8   59.92    3.72
   2  -9  -8   59.36    3.49
   2   9  -7   65.18    3.97
   2  -9  -7   62.06    3.54
   2  -9  -7   60.11    3.80
  -2  -9   7   60.43    3.89
   2   9  -6   13.45    2.03
  -2  -9   6   12.16    1.89
   2  -9  -6   15.14    1.86
   2  -9  -6   12.12    1.84
   2   9  -6   12.94    2.00
   2   9  -6   13.07    1.85
   2  -9  -5   13.32    1.67
  -2  -9   5   15.66    2.06
   2   9  -5   15.96    2.14
  -2   9   5   13.00    1.50
   2   9  -5   18.01    2.27
   2  -9  -5   14.58    2.08
   2   9  -5   13.62    1.85
  -2   9   5    9.93    1.34
  -2  -9   5   14.17    1.52
   2   9  -4  335.48    9.71
  -2   9   4  332.37    8.89
   2   9  -4  345.37   10.15
   2  -9  -4  330.48   10.47
  -2  -9   4  344.08    9.95
  -2  -9   4  323.75    8.54
   2   9  -4  332.63   10.02
  -2   9   4  333.93    8.93
   2   9  -3  511.05   12.76
  -2  -9   3  517.99   13.06
   2   9  -3  517.13   13.23
  -2   9   3  508.19   12.24
  -2  -9   3  510.69   11.75
   2   9  -3  525.24   13.29
  -2   9   3  505.60   12.24
   2   9  -2  279.14    8.32
   2   9  -2  272.04    8.22
   2   9  -2  261.91    8.52
  -2   9   2  282.70    9.40
  -2   9   2  274.60    8.11
  -2   9   2  275.86    9.34
  -2  -9   2  273.41    8.54
  -2   9   2  278.12    8.16
  -2  -9   2  278.67    7.62
   2   9  -2  274.07    8.66
   2   9  -1  335.45    9.24
  -2   9   1  342.75    9.38
   2   9  -1  328.07    9.19
  -2   9   1  326.87   10.40
   2   9  -1  329.54    9.59
  -2   9   1  326.93    9.26
  -2   9   1  351.48   10.59
  -2  -9   1  350.86    9.71
   2  -9  -1  306.60    8.25
   2   9  -1  321.23    9.49
  -2  -9   1  328.01    8.60
  -2  -9   0   19.21    2.07
  -2   9   0   22.65    2.56
   2   9   0   17.06    1.95
  -2   9   0   24.38    2.60
   2   9   0   16.43    1.93
  -2   9   0   19.07    2.08
   2  -9   0   13.64    1.53
  -2  -9   0   24.61    1.98
  -2   9   0   16.71    1.96
  -2   9  -1   81.38    4.19
  -2   9  -1   77.81    4.62
  -2  -9  -1   79.55    4.13
  -2   9  -1   81.82    4.73
   2   9   1   79.20    3.95
  -2   9  -1   83.21    4.20
   2   9   1   86.41    4.07
  -2  -9  -1   77.66    3.59
   2  -9   1   73.36    3.64
  -2   9  -2  185.87    7.50
  -2   9  -2  198.48    7.67
   2   9   2  193.73    6.37
  -2   9  -2  197.89    6.95
   2   9   2  186.83    6.27
  -2  -9  -2  196.73    6.75
   2  -9   2  200.64    6.65
  -2  -9  -2  195.25    6.18
  -2   9  -2  207.51    7.07
  -2   9  -3   24.46    2.70
  -2  -9  -3   25.17    2.09
   2  -9   3   30.06    2.50
  -2   9  -3   28.34    2.64
  -2   9  -3   27.01    2.75
   2   9   3   22.73    1.98
  -2  -9  -3   25.19    2.30
   2   9   3   26.62    2.08
  -2   9  -3   27.45    2.60
  -2   9  -4  277.03    7.93
  -2   9  -4  285.15    9.63
   2  -9   4  288.04    8.91
  -2   9  -4  302.34    9.04
  -2   9  -4  289.95    9.58
  -2   9  -4  288.27    8.89
  -2   9  -4  303.46    9.94
  -2  -9  -4  287.19    8.55
  -2  -9  -4  289.56    8.10
  -2  -9  -5  119.50    4.98
  -2   9  -5  120.67    5.89
  -2  -9  -5  109.06    4.04
  -2   9  -5  108.80    5.38
  -2   9  -5  111.97    4.67
   2  -9   5  116.14    5.38
  -2  -9  -5  121.62    4.74
  -2  -9  -6  304.22    8.04
  -2   9  -6  317.20   10.28
  -2   9  -6  312.18    9.74
  -2  -9  -6  316.22    8.74
  -2   9  -6  327.73    9.51
  -2   9  -6  319.59    8.96
   2  -9   6  319.84    9.96
  -2   9  -6  341.32    9.67
  -2  -9  -6  323.60    9.04
  -2  -9  -7  940.34   19.06
  -2  -9  -7  871.13   18.17
  -2   9  -7  916.57   19.67
   2  -9   7  931.85   20.74
  -2  -9  -7  923.40   19.18
  -2   9  -7  851.82   19.06
  -2   9  -7  942.29   19.80
  -2  -9  -8    8.84    1.40
  -2  -9  -8   10.16    1.51
  -2  -9  -8    9.37    1.34
  -2   9  -8    9.98    1.59
   2  -9   8    8.79    1.81
  -2   9  -8    8.30    1.54
  -2   9  -8    8.77    1.53
  -2  -9  -9  255.88    7.37
  -2  -9  -9  270.40    7.83
  -2   9  -9  249.74    8.84
  -2  -9  -9  254.30    7.32
   2  -9   9  266.15    8.96
  -2   9  -9  264.35    7.81
  -2   9  -9  266.61    7.81
  -2   9  -9  251.90    7.92
  -2  -9 -10   40.82    2.74
  -2   9 -10   41.25    2.90
  -2  -9 -10   41.25    2.56
   2  -9  10   46.72    3.44
  -2  -9 -10   45.14    2.53
  -2   9 -10   45.97    2.74
  -2   9 -10   41.46    2.63
  -2  -9 -11    1.11    0.82
  -2  -9 -11    0.79    0.68
  -2   9 -11    0.25    0.58
  -2   9 -11    0.77    0.94
  -2   9 -11   -0.15    0.63
   2  -9  11    2.30    1.13
  -2   9 -12  237.52    7.00
  -2  -9 -12  225.20    6.34
   2  -9  12  238.58    7.57
  -2  -9 -13    1.32    0.61
   2  -9  13    2.30    0.97
   2   9  13    3.63    1.26
  -2   9 -13    2.29    0.84
  -2   9 -14  272.82    7.04
   2  -9  14  273.38    7.16
  -2   9 -14  268.01    6.73
   2 -10 -13   32.27    1.99
  -2 -10  13   33.61    2.05
   2 -10 -12  323.38    8.08
  -2 -10  12  331.87    8.33
   2  10 -12  311.79    7.54
   2  10 -12  311.39    7.56
  -2 -10  11   54.24    3.09
   2  10 -11   49.07    2.77
   2 -10 -11   54.65    2.94
   2  10 -11   50.63    2.82
   2 -10 -10  280.03    7.91
   2  10 -10  274.00    7.96
   2  10 -10  276.18    7.99
   2 -10  -9   42.78    2.78
   2  10  -9   39.66    2.89
   2  10  -9   37.42    2.79
   2 -10  -8  519.20   12.45
  -2 -10   8  524.00   13.29
  -2 -10   7   77.24    4.26
   2 -10  -7   74.83    3.80
   2  10  -7   69.23    4.06
   2 -10  -7   72.23    4.03
  -2 -10   6   89.99    4.65
   2 -10  -6   81.26    4.01
   2  10  -6   79.92    4.37
   2  10  -6   86.15    4.55
   2 -10  -6   83.35    4.49
   2  10  -6   81.31    4.45
  -2  10   5   13.17    1.48
  -2 -10   5   12.51    1.93
   2 -10  -5   12.68    1.71
   2  10  -5   14.49    2.11
  -2  10   5   11.90    1.42
   2  10  -5   13.83    2.09
   2  10  -5   12.94    1.78
   2  10  -4 1646.83   31.62
  -2 -10   4 1625.52   31.86
   2 -10  -4 1587.05   30.66
   2 -10  -4 1620.67   32.77
   2  10  -4 1566.55   31.43
   2  10  -4 1618.62   31.87
  -2  10   4 1600.93   30.23
  -2  10   4 1608.79   30.30
   2  10  -4 1613.79   31.81
  -2 -10   3   29.82    2.76
   2  10  -3   31.90    2.66
   2 -10  -3   29.44    2.95
   2  10  -3   31.89    2.82
  -2  10   3   29.91    2.44
  -2  10   3   28.36    2.37
   2  10  -3   25.87    2.58
   2  10  -2 1684.93   31.46
   2  10  -2 1604.92   31.81
  -2  10   2 1628.28   31.06
  -2 -10   2 1620.63   31.83
  -2  10   2 1534.94   32.87
   2  10  -2 1613.42   31.80
  -2  10   2 1616.96   31.07
   2  10  -1  228.70    7.58
   2  10  -1  225.48    7.59
  -2  10   1  219.93    8.43
  -2  10   1  229.40    8.53
  -2 -10   1  226.89    7.67
  -2  10   1  221.02    7.32
  -2  10   1  226.42    7.42
   2  10   0 1009.95   21.43
   2 -10   0  999.00   20.31
  -2  10   0 1066.81   23.31
  -2  10   0 1049.08   23.32
   2  10   0 1023.51   21.52
  -2  10   0 1018.94   21.56
  -2  10   0 1026.07   21.59
  -2 -10   0 1015.43   20.06
  -2 -10   0 1035.95   21.80
  -2 -10  -1   23.16    2.28
  -2  10  -1   23.25    2.34
  -2  10  -1   19.41    2.45
   2  10   1   16.04    1.85
  -2  10  -1   17.99    2.41
  -2  10  -1   17.78    2.06
   2 -10   1   17.37    1.78
   2  10   1   18.75    1.98
  -2 -10  -1   20.01    1.76
  -2  10  -2  134.04    6.29
  -2  10  -2  133.06    5.58
  -2  10  -2  124.44    6.10
  -2  10  -2  134.44    5.61
   2  10   2  121.80    4.89
  -2 -10  -2  133.22    4.87
  -2 -10  -2  130.58    5.39
   2 -10   2  119.10    4.93
   2  10   2  128.02    4.97
  -2 -10  -3  333.65    9.43
  -2  10  -3  331.59   10.73
  -2  10  -3  341.62   10.87
   2 -10   3  328.39    9.26
   2  10   3  314.18    8.43
  -2  10  -3  334.37    9.79
  -2 -10  -3  331.86    8.55
  -2  10  -3  338.62    9.82
   2  10   3  318.57    8.49
  -2  10  -4   44.74    3.68
  -2  10  -4   51.96    3.42
  -2  10  -4   47.52    3.69
   2 -10   4   47.72    3.23
  -2 -10  -4   47.26    3.09
  -2 -10  -4   49.37    2.80
  -2  10  -4   48.08    3.33
  -2  10  -5   21.94    2.57
  -2 -10  -5   24.80    2.21
  -2 -10  -5   23.01    1.94
  -2  10  -5   21.80    2.64
   2 -10   5   24.78    2.39
  -2 -10  -6   49.34    3.00
  -2 -10  -6   54.17    2.94
  -2  10  -6   52.46    3.84
  -2  10  -6   46.99    3.64
  -2  10  -6   47.18    2.80
  -2  10  -6   51.53    3.36
   2 -10   6   50.84    3.40
  -2  10  -6   49.85    3.31
  -2 -10  -7  232.37    6.87
  -2  10  -7  226.59    8.41
  -2  10  -7  235.49    8.52
  -2  10  -7  242.20    7.64
  -2  10  -7  245.58    7.69
  -2 -10  -7  232.60    7.03
   2 -10   7  240.45    7.99
  -2  10  -7  233.11    6.97
  -2  10  -8  145.20    5.44
  -2 -10  -8  139.37    4.97
  -2  10  -8  144.94    6.27
  -2  10  -8  142.78    5.38
   2 -10   8  141.18    5.80
  -2 -10  -8  138.67    4.89
  -2  10  -8  140.55    5.08
  -2 -10  -9  171.24    5.49
   2 -10   9  180.87    6.39
  -2  10  -9  166.44    5.61
  -2 -10  -9  155.78    4.78
  -2 -10  -9  158.61    4.99
  -2  10  -9  161.68    5.47
  -2  10  -9  166.35    5.61
  -2  10 -10    0.89    0.70
  -2 -10 -10    1.76    0.77
  -2 -10 -10    1.55    0.58
  -2  10 -10    1.20    0.68
   2 -10  10    1.64    0.93
  -2  10 -10    0.51    0.72
  -2  10 -11    5.19    0.81
  -2  10 -11    5.33    0.82
   2 -10  11    6.61    1.25
  -2  10 -11    6.50    1.06
   2  10  12    2.74    0.92
  -2  10 -12    2.32    0.86
  -2  10 -12    2.96    0.80
   2 -10  12    2.85    0.83
   2 -11 -12    5.73    0.83
  -2 -11  12    6.46    0.92
   2  11 -11    4.47    0.87
   2  11 -11    6.67    1.05
   2  11 -11    4.44    0.86
   2 -11 -11    5.58    0.93
   2  11 -10    7.81    1.16
   2  11 -10    8.27    1.23
   2 -11 -10    7.50    1.12
   2  11 -10    8.18    1.21
   2  11  -9   38.54    2.59
   2 -11  -9   37.67    2.31
   2  11  -9   35.18    2.43
  -2 -11   9   35.00    2.52
   2  11  -9   36.41    2.46
  -2 -11   8  121.43    4.94
   2 -11  -8  108.23    4.24
   2  11  -8  114.37    4.75
   2 -11  -7    0.55    0.72
   2  11  -7    1.84    1.07
   2  11  -7    1.28    0.87
   2  11  -7    1.31    0.99
  -2 -11   7    0.54    0.93
   2  11  -6   36.41    2.68
   2 -11  -6   33.42    2.37
   2  11  -6   34.33    2.75
  -2 -11   6   32.03    2.65
   2  11  -6   34.56    2.78
  -2 -11   5   30.04    2.63
   2 -11  -5   34.83    2.42
   2  11  -5   31.24    2.52
   2  11  -5   35.39    2.84
   2  11  -5   35.46    2.82
  -2  11   4   73.65    3.39
   2  11  -4   69.32    3.95
   2  11  -4   72.82    3.84
   2 -11  -4   72.32    3.50
   2  11  -4   74.80    4.08
  -2  11   4   70.39    3.31
  -2 -11   4   74.85    4.05
   2 -11  -3   20.05    1.87
   2 -11  -3   21.09    2.43
   2  11  -3   25.67    2.45
  -2  11   3   20.74    1.93
  -2  11   3   21.74    1.98
  -2 -11   3   21.73    2.28
   2  11  -3   19.78    2.21
  -2  11   2  110.27    4.65
   2 -11  -2  107.06    4.34
   2  11  -2  108.73    4.95
  -2  11   2  117.08    4.74
   2 -11  -2  104.63    5.48
  -2 -11   2  114.45    5.06
   2  11  -2  114.11    5.01
   2  11  -1  162.50    6.05
  -2  11   1  160.36    5.90
  -2 -11   1  168.44    6.27
   2  11  -1  160.82    6.02
  -2  11   1  164.53    5.97
  -2  11   0  136.27    6.32
  -2  11   0  142.00    5.53
  -2  11   0  133.98    6.32
  -2 -11   0  146.43    5.69
   2  11   0  137.23    5.38
   2  11   0  131.67    5.29
  -2  11   0  140.81    5.55
  -2  11  -1    2.67    1.16
  -2  11  -1    0.97    0.97
   2  11   1    0.41    0.82
   2  11   1    1.70    0.91
  -2  11  -1    0.32    0.82
  -2  11  -1    3.03    1.38
  -2 -11  -1    0.86    0.97
   2  11   2    0.67    0.72
  -2  11  -2    1.07    1.08
  -2  11  -2    1.55    1.14
   2  11   2    1.44    0.78
  -2  11  -2    1.72    1.26
   2 -11   2    1.43    0.77
  -2  11  -2    1.14    0.97
  -2 -11  -2    0.98    0.97
  -2  11  -3  150.86    5.83
  -2 -11  -3  141.27    5.43
  -2  11  -3  143.20    6.48
   2 -11   3  139.21    5.14
  -2  11  -3  150.90    5.86
  -2  11  -3  150.84    6.57
   2 -11   4   20.58    1.96
  -2  11  -4   19.74    2.14
  -2  11  -4   21.90    2.55
  -2 -11  -4   20.37    1.95
  -2  11  -4   23.83    2.30
  -2  11  -5  285.43    9.28
   2 -11   5  265.52    7.86
  -2  11  -5  278.80    8.30
  -2 -11  -5  270.14    7.69
  -2  11  -5  267.44    8.21
  -2  11  -6    5.28    1.52
   2 -11   6    4.54    1.08
  -2 -11  -6    4.60    1.00
  -2  11  -7  102.40    4.99
  -2 -11  -7   97.59    3.76
  -2  11  -7  106.65    4.39
   2 -11   7  101.22    4.29
  -2  11  -7  104.64    4.38
  -2  11  -8  300.23    7.99
   2 -11   8  293.76    8.12
  -2  11  -8  301.96    9.01
  -2  11  -8  305.73    8.02
   2 -11   9   38.82    2.42
  -2  11  -9   43.52    2.90
  -2  11  -9   38.55    2.26
  -2  11  -9   41.47    2.31
  -2  11 -10   15.88    1.29
  -2  11 -10   14.77    1.23
   2 -11  10   16.17    1.48
   2 -11  11   67.19    2.76
   2  12  -9    2.03    0.72
   2  12  -9    2.46    0.76
  -2 -12   9    3.21    0.81
   2 -12  -8   75.61    2.89
  -2 -12   8   85.67    3.58
  -2 -12   7    0.83    0.83
   2 -12  -7    1.41    0.60
   2  12  -7    1.22    0.82
   2  12  -7    0.59    0.79
   2  12  -6    8.51    1.35
   2 -12  -6    7.95    1.04
  -2 -12   6    9.26    1.36
   2  12  -6    7.91    1.33
   2  12  -5   30.91    2.37
  -2 -12   5   30.68    2.36
   2  12  -5   31.16    2.34
   2 -12  -5   28.22    1.86
   2 -12  -4    1.91    0.65
   2  12  -4    2.19    1.01
   2  12  -4    1.02    0.90
  -2 -12   4    1.30    0.88
   2  12  -3   49.58    3.02
  -2  12   3   48.54    2.59
   2 -12  -3   43.73    2.32
  -2 -12   3   52.10    3.10
   2  12  -3   51.45    3.04
  -2  12   3   50.49    2.62
  -2 -12   2    0.48    0.83
   2  12  -2   -0.07    0.76
  -2  12   2    0.75    0.70
   2 -12  -2    0.22    0.51
  -2  12   2    0.46    0.63
   2  12  -2    0.40    0.74
   2 -12  -1   21.70    1.57
  -2 -12   1   25.97    2.18
   2  12  -1   26.11    2.09
  -2  12   1   25.64    2.06
   2  12  -1   27.53    2.15
  -2  12   1   26.08    2.08
  -2  12   0   33.58    2.41
  -2 -12   0   32.03    2.38
   2  12   0   31.80    2.21
  -2  12   0   30.27    2.29
   2  12   0   28.08    2.10
  -2  12  -1   11.81    1.55
  -2 -12  -1    8.68    1.32
  -2  12  -1    8.62    1.38
   2  12   1    9.53    1.23
   2  12   1    8.44    1.19
  -2  12  -2   33.50    2.44
  -2  12  -2   36.37    2.93
  -2 -12  -2   34.35    2.34
  -2  12  -2   30.51    2.38
  -2 -12  -3  129.31    4.63
  -2  12  -3  132.60    5.66
  -2  12  -3  129.93    4.97
  -2  12  -3  132.10    5.01
  -2  12  -4   81.35    3.77
  -2  12  -4   85.23    4.36
   2 -12   4   74.39    3.14
  -2  12  -4   76.72    3.66
  -2 -12  -4   81.88    3.41
  -2  12  -5    0.86    0.80
  -2  12  -5    1.38    0.94
  -2  12  -5    1.34    0.83
   2 -12   5    0.66    0.60
  -2 -12  -5    0.18    0.56
   2 -12   6    0.32    0.53
  -2  12  -6    0.23    0.74
   2 -12   7   47.92    2.34
  -2  12  -7   51.91    2.62
  -2  12  -7   54.25    2.68
  -2  12  -8   12.48    1.22
  -2  12  -8   11.98    1.47
  -2  12  -8   13.13    1.25
   2 -12   8   12.85    1.14
  -2 -13   6   39.38    2.10
   2  13  -6   39.68    2.10
   2  13  -6   38.76    2.08
  -2 -13   5   22.58    1.66
   2  13  -5   21.99    1.62
   2  13  -5   23.58    1.68
   2  13  -4   53.09    2.60
  -2 -13   4   58.57    2.74
   2  13  -4   59.45    2.72
  -2 -13   3    5.93    1.01
   2  13  -3    6.57    0.96
   2  13  -3    5.36    0.95
  -2  13   2   23.23    1.51
  -2 -13   2   28.81    1.91
   2  13  -2   28.91    1.85
  -2  13   2   23.63    1.52
   2  13  -2   27.75    1.82
  -2 -13   1   20.12    1.63
   2  13  -1   20.79    1.54
  -2  13   1   21.41    1.53
  -2  13   1   18.77    1.48
   2  13  -1   19.80    1.51
  -2 -13   0   65.90    2.88
  -2  13   0   63.47    2.81
  -2  13   0   66.25    2.89
  -2  13  -1    0.67    0.61
  -2 -13  -1    0.83    0.58
  -2  13  -1    0.85    0.64
  -2  13  -2    2.45    0.79
  -2 -13  -2    2.98    0.67
  -2  13  -2    3.28    0.82
  -2  13  -3   34.97    2.11
  -2  13  -3   36.76    2.14
  -2  13  -4   14.87    1.39
  -2  13  -4   13.95    1.35
  -2  13  -5    0.62    0.59
  -2  13  -5    0.20    0.55
  -3   0  20  374.53    8.91
  -3   0  19    0.49    0.83
   3   0 -19    0.45    0.57
  -3   0  18  610.52   14.66
   3   0 -18  586.18   13.03
   3   0 -17    9.09    1.47
  -3   0  17    1.42    1.14
  -3   0  16   82.88    4.90
   3   0 -16   79.84    4.10
   3   0 -15    0.08    1.08
  -3   0  15    1.14    1.34
   3   0 -14  591.23   14.67
  -3   0  14  581.29   15.31
   3   0 -14  561.70   14.33
   3   0 -14  580.63   13.97
   3   0 -13   -0.09    1.11
   3   0 -13    0.80    0.61
   3   0 -13    0.39    1.01
   3   0 -13    0.52    0.92
   3   0 -12  756.60   16.67
   3   0 -12  711.51   14.90
   3   0 -12  749.85   16.57
   3   0 -12  736.94   16.17
   3   0 -11    0.14    0.76
   3   0 -11   -0.07    0.82
   3   0 -11    1.12    0.92
   3   0 -10 7877.38  126.18
   3   0 -10 7844.46  126.00
   3   0  -9    2.16    0.83
   3   0  -9    0.17    0.41
   3   0  -9   -0.49    0.89
   3   0  -9    0.59    0.71
  -3   0   9    2.26    0.92
   3   0  -8  737.36   14.99
  -3   0   8  742.61   15.85
   3   0  -8  761.38   14.99
  -3   0   8  719.92   15.95
   3   0  -7    1.06    0.64
  -3   0   7    0.98    0.75
  -3   0   7    1.72    0.81
   3   0  -7    1.37    0.72
  -3   0   6 1997.35   36.44
   3   0  -6 2050.13   35.73
   3   0  -6 2052.76   35.28
  -3   0   6 2008.23   36.00
   3   0  -5    2.95    0.67
   3   0  -5    0.12    0.49
   3   0  -3    0.75    0.48
  -3   0   3    0.43    0.53
   3   0  -3    1.87    0.46
   3   0  -1    0.62    0.28
   3   0  -1    0.30    0.31
  -3   0   1    1.07    0.47
   3   0   1    1.68    0.27
   3   0   1    0.94    0.26
   3   0   2  261.08    4.67
  -3   0  -2  250.64    4.79
   3   0   2  256.59    4.61
   3   0   3    0.99    0.14
   3   0   3    1.10    0.16
  -3   0  -3    0.98    0.25
  -3   0  -4 3020.41   49.94
   3   0   5    0.25    0.16
  -3   0  -5    0.33    0.35
  -3   0  -5   -0.04    0.53
   3   0   5    0.56    0.19
  -3   0  -6  369.23    7.61
  -3   0  -6  370.80    7.86
   3   0   6  352.59    6.24
  -3   0  -6  358.09    7.12
  -3   0  -7    1.53    0.57
  -3   0  -7    0.12    0.37
  -3   0  -7    0.25    0.58
  -3   0  -7    0.88    0.21
  -3   0  -8   14.89    1.31
  -3   0  -8   13.70    1.53
  -3   0  -8   13.99    1.14
  -3   0  -8   15.05    1.39
  -3   0  -9    0.10    0.59
  -3   0  -9    0.28    0.43
  -3   0  -9   -0.26    0.71
  -3   0  -9    0.26    0.66
  -3   0 -10  802.45   16.78
  -3   0 -10  776.47   15.99
  -3   0 -10  769.88   15.84
  -3   0 -11    0.79    0.95
  -3   0 -11   -0.36    0.68
  -3   0 -12  203.39    7.18
   3   0  12  200.53    8.50
  -3   0 -12  202.57    6.29
   3   0  13    0.89    1.23
  -3   0 -13    0.26    0.91
  -3   0 -13   -0.36    1.19
  -3   0 -13    1.89    0.85
  -3   0 -14  187.10    6.85
   3   0  14  183.26    7.61
  -3   0 -14  177.58    6.52
  -3   0 -14  163.72    5.51
  -3   0 -15    0.61    0.92
   3   0  15    0.31    1.04
  -3   0 -15    0.16    0.83
  -3   0 -16   85.40    4.26
   3   0  16   84.02    4.28
  -3   0 -16   88.96    4.09
  -3   0 -17    0.27    0.79
   3   0  17    0.42    0.67
  -3   0 -17    0.35    0.63
  -3   0 -18   19.48    1.68
   3   0  18   15.11    1.65
  -3  -1  20    3.17    0.82
  -3  -1  19    0.80    0.88
   3   1 -19    1.08    0.67
   3  -1 -18    1.59    1.04
  -3  -1  18    0.42    0.93
   3  -1 -18    0.05    0.60
   3   1 -18    0.94    0.85
  -3  -1  17   89.84    4.78
   3  -1 -17   78.85    3.71
   3  -1 -17   88.54    4.48
   3   1 -17   78.03    3.98
   3   1 -16   32.16    2.95
   3   1 -16   33.96    2.75
   3  -1 -16   32.62    2.23
  -3  -1  16   34.43    3.18
   3  -1 -16   33.83    2.83
   3  -1 -16   30.22    2.46
   3   1 -15   51.09    3.46
   3   1 -15   52.81    3.73
  -3  -1  15   48.97    3.78
   3  -1 -15   47.11    2.80
   3   1 -15   46.62    3.44
   3  -1 -15   48.48    3.19
   3   1 -14  393.24   11.26
   3  -1 -14  387.00   10.32
   3  -1 -14  372.11    9.56
  -3  -1  14  398.24   11.82
   3   1 -14  381.65   11.11
   3   1 -14  388.20   10.74
   3  -1 -13  214.01    7.42
   3   1 -13  220.91    7.65
   3  -1 -13  216.40    6.46
   3  -1 -13  216.80    7.00
  -3  -1  13  226.23    8.19
   3   1 -13  208.90    7.43
   3   1 -13  214.45    7.23
   3   1 -12   39.37    2.92
   3  -1 -12   38.37    2.63
   3  -1 -12   29.50    2.11
   3  -1 -12   29.49    2.50
  -3   1  12   29.92    2.91
  -3  -1  12   29.49    2.86
   3  -1 -12   28.98    2.46
   3   1 -12   36.81    2.81
   3   1 -12   30.75    2.54
   3   1 -11   88.50    4.19
   3  -1 -11   83.23    3.45
  -3   1  11   92.51    4.74
  -3  -1  11   89.46    4.57
   3  -1 -11   92.60    4.15
   3  -1 -11   88.80    3.96
   3   1 -11   90.34    4.16
   3  -1 -11   90.04    4.13
   3  -1 -10  664.49   14.35
   3   1 -10  657.14   14.40
   3  -1 -10  623.77   13.18
  -3  -1  10  647.51   15.15
   3  -1 -10  662.15   14.25
   3   1 -10  666.24   14.40
   3  -1 -10  651.88   14.10
  -3   1  10  648.22   15.38
   3  -1  -9  198.54    5.84
   3  -1  -9  185.80    5.17
  -3  -1   9  202.14    5.64
   3   1  -9  193.59    5.98
  -3   1   9  209.66    6.80
   3  -1  -9  203.98    5.99
  -3  -1   9  192.55    6.49
   3   1  -9  201.06    5.97
  -3  -1   9  191.58    5.52
  -3   1   9  187.72    6.83
  -3  -1   9  190.19    6.53
   3   1  -8  995.82   19.37
  -3   1   8  972.12   20.55
  -3  -1   8  948.95   18.81
   3  -1  -8  976.91   18.38
  -3   1   8  986.22   20.29
   3  -1  -8 1033.05   19.39
   3   1  -8 1031.72   19.31
   3   1  -8  993.17   19.40
  -3  -1   8 1016.25   20.26
  -3  -1   8 1056.36   19.03
  -3   1   7 1152.07   22.78
   3   1  -7 1139.21   21.67
   3  -1  -7 1199.04   22.26
   3  -1  -7 1178.22   21.72
  -3   1   7 1176.78   22.53
   3   1  -7 1141.53   21.97
   3   1  -7 1196.54   21.63
  -3   1   7 1147.63   22.87
   3   1  -6  842.21   15.96
   3  -1  -6  825.12   16.40
   3  -1  -6  854.15   16.10
   3   1  -6  811.68   16.26
   3   1  -6  856.29   15.91
  -3   1   6  863.94   17.18
  -3   1   6  835.40   16.82
   3  -1  -4  124.68    3.85
   3  -1  -4  130.05    3.69
   3   1  -4  128.42    3.41
   3   1  -4  132.06    3.71
  -3  -1   4  134.57    3.90
   3   1  -3    5.02    0.66
   3   1  -3    6.22    0.62
   3  -1  -3    4.85    0.69
   3  -1  -3    5.19    0.74
  -3  -1   3    5.71    0.77
  -3   1   3    5.94    0.93
   3  -1  -2  263.18    5.83
   3  -1  -2  247.22    5.61
   3   1  -2  253.22    5.38
   3   1  -2  250.93    5.05
  -3   1   2  270.67    6.26
  -3  -1   2  254.15    5.58
  -3   1   0  952.50   17.05
   3   1   0  972.12   16.39
   3   1   0  968.97   15.97
   3  -1   0  986.25   17.04
  -3  -1   0  958.63   16.62
   3  -1   0  949.08   17.23
   3  -1   1  939.74   15.46
   3   1   1  833.92   14.09
   3   1   1  838.13   14.08
   3  -1   1  932.04   15.12
  -3   1  -1  889.33   15.17
   3  -1   2 1395.78   23.93
  -3   1  -2 1361.20   23.68
   3  -1   2 1391.20   23.52
   3  -1   4 2303.70   38.08
  -3   1  -4 2216.92   38.55
  -3   1  -4 2306.87   38.26
  -3  -1  -5 6267.60  107.32
  -3  -1  -5 6471.35  106.92
  -3  -1  -5 6534.59  107.35
  -3   1  -5 6590.01  107.36
  -3  -1  -6 1415.46   25.06
   3  -1   6 1444.61   24.05
  -3  -1  -6 1417.61   25.52
  -3   1  -6 1376.78   25.68
  -3   1  -6 1410.35   24.17
  -3  -1  -6 1400.38   25.47
  -3   1  -6 1395.00   25.41
  -3  -1  -6 1335.53   23.64
  -3   1  -6 1402.37   24.73
  -3   1  -7  149.25    4.18
   3  -1   7  164.01    3.87
  -3  -1  -7  142.04    4.15
  -3   1  -7  144.14    3.77
  -3  -1  -7  158.91    4.96
  -3   1  -7  147.30    4.82
  -3  -1  -7  145.61    4.43
  -3  -1  -7  132.24    3.48
  -3   1  -7  149.88    4.71
  -3   1  -7  148.07    4.27
  -3  -1  -8  420.36    9.45
  -3   1  -8  426.89   10.03
  -3  -1  -8  411.59    8.98
  -3   1  -8  416.24    9.15
  -3   1  -8  440.96    9.89
  -3   1  -8  414.38    9.10
  -3  -1  -9  345.05    8.44
  -3   1  -9  345.40    8.96
  -3  -1  -9  311.65    7.16
  -3   1  -9  344.65    8.16
  -3   1  -9  341.64    8.70
  -3  -1  -9  327.89    7.84
  -3  -1 -10    0.85    0.77
  -3  -1 -10    1.36    0.92
  -3   1 -10    0.37    0.85
   3  -1  10    0.21    0.95
  -3   1 -10    2.17    0.68
  -3  -1 -10    0.47    0.58
  -3  -1 -11    3.36    1.05
  -3  -1 -11    5.53    1.37
  -3   1 -11    2.57    1.10
  -3   1 -11    2.76    1.06
   3  -1  11    4.13    1.39
  -3   1 -11    2.79    0.77
  -3   1 -11    3.29    1.06
  -3  -1 -11    3.38    0.84
  -3   1 -12   91.50    4.55
  -3  -1 -12   94.11    4.59
   3  -1  12   91.21    5.07
  -3   1 -12   90.54    4.46
  -3   1 -12   86.79    4.09
  -3  -1 -12   79.11    3.39
  -3   1 -13    4.19    1.26
  -3  -1 -13    4.55    1.42
  -3   1 -13    3.69    1.32
   3   1  13    3.71    1.73
   3  -1  13    3.83    1.39
  -3   1 -13    3.62    1.13
  -3   1 -14    0.43    0.90
  -3  -1 -14    0.27    1.15
  -3   1 -14    1.89    1.29
  -3  -1 -14    0.84    0.97
   3   1  14    0.96    1.52
   3  -1  14    1.27    0.97
  -3   1 -14    2.09    0.95
  -3  -1 -15   56.15    3.60
  -3   1 -15   55.10    3.50
  -3  -1 -15   59.93    3.48
  -3   1 -15   51.43    3.33
   3   1  15   52.47    3.99
   3  -1  15   53.18    3.38
  -3   1 -15   50.99    2.91
  -3   1 -16  123.77    5.18
  -3   1 -16  119.48    4.23
  -3   1 -16  132.12    5.11
  -3  -1 -16  130.34    5.30
   3   1  16  122.71    5.58
  -3  -1 -16  123.79    4.90
  -3  -1 -17  110.05    4.49
  -3   1 -17  107.51    4.44
  -3  -1 -17  106.54    4.09
   3   1  17  100.56    4.41
  -3   1 -17  102.82    4.07
   3  -1  18    7.39    1.21
  -3  -1 -18    8.59    1.17
  -3   1 -18    6.96    1.08
   3   1  18    6.25    0.97
  -3   2  19   96.05    4.13
  -3  -2  19   94.67    4.02
   3   2 -19   93.20    3.60
  -3   2  18   16.95    2.01
  -3  -2  18   16.89    1.93
   3  -2 -18   15.68    1.82
   3   2 -18   17.28    1.82
   3  -2 -17   27.80    2.49
   3  -2 -17   25.11    1.92
  -3   2  17   27.00    2.69
  -3  -2  17   27.52    2.64
   3  -2 -17   26.89    1.91
   3   2 -17   24.31    2.29
   3  -2 -16   63.82    3.87
   3   2 -16   62.02    3.71
  -3   2  16   62.79    4.23
   3   2 -16   59.33    3.88
  -3  -2  16   64.14    4.17
   3  -2 -16   60.52    3.71
   3  -2 -16   60.44    3.19
   3  -2 -16   58.28    3.13
   3   2 -15  160.06    6.61
   3  -2 -15  138.47    5.24
  -3  -2  15  155.74    6.77
   3  -2 -15  145.05    6.04
   3   2 -15  147.37    6.10
   3  -2 -15  150.60    5.50
   3   2 -15  158.72    6.59
  -3   2  15  147.03    6.77
   3   2 -14   82.79    4.67
   3   2 -14   85.57    4.66
   3  -2 -14   79.82    3.85
  -3   2  14   85.62    5.03
  -3  -2  14   87.65    4.96
   3  -2 -14   89.01    4.14
   3   2 -13  263.64    8.72
   3  -2 -13  263.44    7.64
  -3   2  13  280.81    9.58
  -3  -2  13  272.11    9.14
   3  -2 -13  277.79    7.92
   3   2 -13  263.15    8.69
   3  -2 -12  342.72    8.76
  -3   2  12  340.37   10.60
  -3  -2  12  351.45   10.38
   3   2 -12  335.78    9.72
   3  -2 -12  347.51    9.05
   3   2 -12  356.43    9.93
   3   2 -11 1534.12   28.64
   3  -2 -11 1558.26   29.79
   3   2 -11 1567.76   30.05
   3  -2 -11 1503.57   28.63
  -3   2  11 1633.20   31.46
   3   2 -11 1541.21   28.64
   3  -2 -11 1584.94   29.66
  -3  -2  11 1555.59   30.66
   3   2 -11 1594.58   29.99
   3  -2 -11 1549.43   29.14
   3   2 -11 1601.42   29.69
   3  -2 -10  418.21    9.96
   3  -2 -10  393.48    9.42
  -3  -2  10  386.87    9.43
  -3  -2  10  392.33    9.83
  -3   2  10  435.53   11.47
   3  -2 -10  415.41   10.23
  -3  -2  10  410.22   10.89
   3   2 -10  408.65   10.30
   3   2 -10  414.51   10.23
   3   2 -10  409.61   10.43
  -3  -2  10  409.38    9.97
  -3  -2   9   10.62    1.51
  -3  -2   9   10.47    1.16
   3   2  -9   12.00    1.51
  -3  -2   9    9.91    1.29
  -3  -2   9    8.81    1.21
   3  -2  -9   10.75    1.38
  -3  -2   9    7.99    1.32
  -3   2   9    9.62    1.47
  -3   2   9   10.19    1.68
   3   2  -9    8.29    1.25
   3   2  -9    9.44    1.33
   3   2  -8   79.82    3.38
   3  -2  -8   77.56    2.98
  -3   2   8   73.44    3.75
   3  -2  -8   82.30    3.44
  -3   2   8   77.91    3.75
  -3  -2   8   70.14    3.52
   3   2  -8   83.68    3.40
  -3  -2   8   74.44    3.00
  -3  -2   8   78.56    3.35
  -3   2   8   71.91    3.95
   3   2  -8   78.12    3.36
  -3  -2   8   76.62    3.31
  -3   2   7    7.40    1.23
   3   2  -7    7.07    1.04
  -3  -2   7    9.43    1.14
   3  -2  -7    8.44    1.18
  -3   2   7    7.84    1.20
   3   2  -7    8.41    1.10
  -3   2   7    9.46    1.46
  -3  -2   7    7.65    1.23
   3   2  -7    9.69    1.26
   3   2  -6   77.15    2.99
  -3  -2   6   80.28    3.29
   3   2  -6   79.41    3.10
   3  -2  -6   92.20    3.36
  -3  -2   6   82.96    3.17
  -3  -2   6   81.33    3.36
   3   2  -6   84.09    3.04
   3   2  -6   80.73    3.22
   3  -2  -6   81.00    3.38
  -3   2   6   77.48    3.72
  -3   2   6   84.14    3.38
  -3  -2   6   79.71    3.11
   3  -2  -5 4059.52   67.79
  -3  -2   5 4089.36   67.45
  -3  -2   5 4009.21   67.26
  -3  -2   5 3943.78   67.58
   3   2  -5 4071.68   67.32
  -3  -2   5 3803.99   67.15
  -3   2   5 3948.48   68.53
  -3  -2   4  124.40    3.77
   3  -2  -4  126.42    3.90
   3  -2  -4  123.34    4.03
   3   2  -4  124.63    3.42
   3   2  -4  125.87    3.72
   3  -2  -3   38.71    2.07
   3   2  -3   40.78    1.61
   3   2  -3   42.80    1.82
  -3  -2   3   41.08    1.83
   3  -2  -3   40.93    2.02
  -3  -2   2  160.87    4.04
   3  -2  -2  166.13    4.48
   3   2  -2  169.23    4.03
   3   2  -2  164.28    3.69
  -3   2   2  169.85    4.53
   3  -2  -2  173.58    4.72
  -3   2   1 1561.71   27.83
  -3  -2   1 1632.68   27.08
   3  -2  -1 1583.66   27.76
   3   2  -1 1625.64   27.02
   3  -2  -1 1612.39   28.18
   3   2  -1 1554.17   26.52
   3   2   0  180.44    3.68
  -3   2   0  172.57    4.44
   3  -2   0  169.80    4.68
  -3  -2   0  180.61    3.72
   3  -2   0  182.46    4.44
   3  -2   1 4345.44   72.76
  -3   2  -2  692.56   13.20
   3  -2   2  716.56   13.07
   3  -2   2  701.00   13.68
  -3   2  -3 8116.13  134.07
  -3  -2  -4  822.05   16.01
  -3   2  -4  825.68   16.23
  -3   2  -4  857.74   15.61
  -3   2  -4  846.19   15.75
   3  -2   4  860.46   15.40
  -3  -2  -4  826.88   15.82
  -3   2  -5 3427.33   57.22
  -3  -2  -5 3316.09   57.57
  -3   2  -5 3278.38   58.03
  -3   2  -5 3359.53   57.98
  -3   2  -5 3397.03   57.48
   3  -2   5 3547.09   56.95
  -3  -2  -5 3318.30   57.48
  -3  -2  -5 3408.25   57.95
  -3   2  -5 3446.30   58.01
  -3   2  -6   11.92    1.08
  -3  -2  -6   14.61    1.34
  -3   2  -6   18.97    1.58
  -3  -2  -6   12.27    1.23
  -3   2  -6   14.72    1.29
   3  -2   6   14.82    1.09
  -3  -2  -6   21.88    1.63
  -3   2  -6   16.00    1.47
  -3   2  -6   14.49    1.43
  -3   2  -7  185.12    5.34
  -3   2  -7  192.03    5.76
   3  -2   7  182.42    4.83
  -3  -2  -7  184.83    5.37
  -3  -2  -7  183.52    5.61
  -3  -2  -7  191.87    5.63
  -3   2  -7  199.33    5.87
  -3   2  -7  202.60    5.93
  -3   2  -7  191.49    5.14
  -3  -2  -8  683.78   14.58
  -3  -2  -8  700.65   15.11
  -3   2  -8  708.04   15.17
  -3   2  -8  726.05   15.27
  -3   2  -8  704.17   15.18
  -3  -2  -8  725.71   14.98
  -3   2  -8  722.74   14.68
  -3   2  -9  603.98   13.87
  -3  -2  -9  620.13   13.38
  -3   2  -9  602.54   13.81
  -3  -2  -9  599.10   13.64
  -3   2  -9  638.20   13.94
  -3   2  -9  597.48   13.16
  -3   2 -10  547.96   12.93
  -3  -2 -10  539.28   12.33
  -3   2 -10  518.76   12.81
  -3   2 -10  527.95   12.12
  -3   2 -10  525.91   12.69
  -3   2 -11  401.08   10.65
   3  -2  11  363.83   10.54
  -3  -2 -11  400.26   10.17
  -3   2 -11  410.35   10.76
  -3   2 -11  399.75   10.41
  -3   2 -11  358.16    9.64
  -3  -2 -12    1.71    1.03
  -3   2 -12    1.05    1.04
  -3   2 -12    2.66    0.89
  -3   2 -12    1.34    1.03
  -3   2 -12    0.87    1.00
  -3  -2 -13  110.58    5.09
  -3   2 -13  107.55    5.10
  -3   2 -13  100.82    4.92
  -3   2 -13  101.84    4.70
  -3   2 -14    2.59    1.13
  -3  -2 -14    4.63    1.48
  -3   2 -14    4.85    1.44
   3   2  14    8.22    2.05
  -3   2 -14    3.78    1.12
  -3   2 -15   98.36    4.69
  -3  -2 -15  104.09    4.88
  -3   2 -15   98.63    4.77
   3   2  15  104.67    5.93
  -3  -2 -15  102.67    4.59
  -3   2 -15  103.10    4.46
  -3  -2 -16    0.99    0.98
  -3   2 -16    0.67    0.93
  -3   2 -16   -0.18    0.75
   3   2  16    0.10    1.02
  -3   2 -16    0.14    0.68
  -3  -2 -16    0.07    0.66
  -3   2 -17   11.07    1.45
  -3   2 -17   12.58    1.38
  -3  -2 -17   12.39    1.53
  -3   2 -17   10.71    1.16
   3  -2  17   10.89    1.71
   3   2  17   12.55    1.69
  -3  -2 -17   12.47    1.36
  -3  -2 -18  105.56    3.90
  -3   2 -18  100.49    3.64
   3   2  18   97.55    3.77
   3  -2  18   97.94    4.07
  -3   3  19   28.25    2.08
  -3  -3  19   24.74    1.90
   3   3 -19   26.83    1.87
   3   3 -18   31.10    2.31
   3  -3 -18   28.56    2.22
   3  -3 -18   25.66    1.77
  -3   3  18   31.90    2.52
  -3  -3  18   28.73    2.32
   3  -3 -17   22.65    2.20
   3  -3 -17   20.85    1.79
  -3   3  17   20.57    2.32
  -3  -3  17   24.67    2.41
   3  -3 -16    0.60    0.97
   3   3 -16    1.39    0.99
   3  -3 -16    0.53    0.73
  -3  -3  16    0.77    1.11
  -3   3  16    1.99    1.21
   3  -3 -16    0.51    0.84
   3   3 -15 1250.97   26.46
   3  -3 -15 1298.47   25.94
   3  -3 -15 1248.51   24.72
  -3   3  15 1281.17   27.30
  -3  -3  15 1253.90   26.64
   3  -3 -15 1201.25   25.53
   3  -3 -15 1238.35   23.92
   3   3 -14    6.37    1.53
   3  -3 -14    5.76    1.44
   3  -3 -14    5.78    1.25
  -3   3  14    5.72    1.62
   3  -3 -14    5.29    1.28
  -3  -3  14    5.05    1.59
   3  -3 -14    3.96    1.09
   3   3 -14    5.49    1.65
   3   3 -13   23.69    2.50
   3  -3 -13   22.43    2.05
   3   3 -13   24.01    2.52
  -3   3  13   27.50    2.87
   3  -3 -13   23.47    2.26
  -3  -3  13   24.72    2.63
  -3  -3  13   19.75    1.86
   3  -3 -13   22.88    2.00
   3   3 -13   23.38    2.45
   3   3 -12  833.61   18.44
   3  -3 -12  830.00   16.90
   3  -3 -12  785.63   16.97
  -3   3  12  807.39   19.25
  -3  -3  12  821.18   18.75
   3   3 -12  809.82   17.90
   3   3 -12  805.75   18.28
  -3  -3  12  771.35   16.93
   3   3 -12  809.20   16.63
   3   3 -12  790.65   16.52
   3   3 -11  853.31   17.98
   3  -3 -11  828.19   17.15
   3   3 -11  810.08   17.22
   3  -3 -11  811.89   17.12
  -3  -3  11  840.90   18.80
   3   3 -11  795.99   17.15
  -3  -3  11  824.58   17.32
   3   3 -11  842.37   18.32
   3   3 -11  833.33   18.32
  -3   3  11  870.67   19.49
   3   3 -10  258.49    7.83
   3  -3 -10  242.46    7.00
   3   3 -10  266.00    7.83
   3  -3 -10  250.64    7.06
  -3   3  10  267.50    8.61
   3  -3 -10  259.69    7.58
   3   3 -10  264.69    7.62
  -3  -3  10  256.86    8.13
  -3  -3  10  257.22    7.28
   3   3 -10  251.96    7.57
   3   3 -10  258.68    7.59
   3   3  -9  560.44   12.98
   3  -3  -9  541.33   12.24
  -3  -3   9  575.58   13.14
   3  -3  -9  593.80   13.00
  -3   3   9  573.76   13.91
  -3  -3   9  585.60   13.53
  -3  -3   9  564.54   12.54
   3   3  -9  565.18   12.84
   3   3  -9  583.16   13.01
  -3  -3   9  564.82   13.08
  -3   3   8  513.21   12.34
   3   3  -8  510.59   11.61
   3   3  -8  528.61   11.63
   3  -3  -8  492.12   10.98
  -3  -3   8  519.13   11.97
  -3  -3   8  503.50   11.30
   3  -3  -8  519.66   11.66
  -3   3   8  502.53   12.35
  -3   3   8  465.07   12.99
  -3  -3   8  510.41   12.06
   3   3  -8  518.73   11.52
  -3  -3   8  513.88   11.96
  -3  -3   7  102.45    3.77
   3   3  -7  101.62    3.88
  -3  -3   7  104.34    4.15
  -3   3   7  100.34    4.74
  -3  -3   7  103.52    4.12
   3   3  -7  102.44    3.82
   3  -3  -7  108.15    4.10
  -3   3   7  103.96    4.24
  -3  -3   7  103.86    4.16
  -3   3   7  104.18    4.20
   3   3  -7  104.42    3.86
  -3  -3   7  110.29    4.24
  -3   3   6 7133.29  119.10
   3   3  -6 7281.94  118.80
  -3   3   6 7170.01  117.99
  -3  -3   6 7232.17  119.30
  -3  -3   6 6690.38  119.18
  -3  -3   6 7313.14  119.48
  -3   3   6 7140.60  117.97
  -3  -3   6 6963.92  118.64
  -3   3   6 7143.03  120.90
   3   3  -6 7288.40  119.35
  -3  -3   6 7318.70  119.43
   3   3  -6 7120.97  118.76
  -3   3   5  365.17    8.54
   3   3  -5  375.55    8.36
   3  -3  -5  392.04    9.26
  -3  -3   5  379.35    8.72
  -3  -3   5  376.62    8.95
   3  -3  -5  391.25    9.01
  -3  -3   5  366.15    8.79
   3   3  -5  389.36    8.37
  -3  -3   5  367.40    8.87
   3   3  -5  382.01    8.77
   3   3  -5  383.31    8.43
  -3  -3   4 1447.64   26.22
  -3  -3   4 1456.77   26.67
   3  -3  -4 1449.05   26.75
   3   3  -4 1443.47   25.84
   3   3  -4 1443.66   26.30
  -3  -3   4 1423.66   26.60
   3  -3  -4 1486.89   26.93
   3  -3  -4 1462.71   27.14
  -3  -3   3  547.06   10.79
  -3  -3   3  539.39   11.32
  -3   3   3  524.19   11.74
   3  -3  -3  552.38   11.44
  -3  -3   3  533.77   11.11
   3   3  -3  535.37   10.39
  -3  -3   3  544.61   11.34
   3   3  -3  545.79   10.89
   3  -3  -3  524.14   11.68
   3  -3  -2 4057.17   67.03
   3   3  -2 3922.84   65.66
   3  -3  -2 3929.87   67.51
   3   3  -2 3985.18   66.21
   3   3  -1  721.25   13.21
  -3  -3   1  734.55   13.17
  -3   3   1  730.47   14.17
   3  -3  -1  716.46   14.62
   3   3  -1  704.03   12.68
   3  -3  -1  735.29   14.11
   3   3   0 1631.06   27.04
  -3  -3   0 1638.69   27.59
   3   3   0 1603.56   27.61
  -3   3   0 1650.02   28.90
   3  -3   0 1664.09   28.85
   3  -3   0 1618.47   29.52
  -3  -3  -1   20.45    0.82
   3   3   1   21.81    0.85
  -3   3  -1   20.44    1.43
  -3   3  -1   20.18    1.47
   3  -3   1   17.34    1.30
   3  -3   1   20.11    1.65
  -3   3  -1   19.63    1.38
  -3   3  -2  595.09   11.94
   3  -3   2  618.36   12.03
  -3   3  -2  617.41   12.41
  -3   3  -2  579.85   12.12
  -3   3  -2  599.40   12.21
  -3   3  -2  610.44   11.98
  -3   3  -2  624.44   12.22
  -3  -3  -3  800.21   15.96
  -3   3  -3  855.44   16.17
  -3   3  -3  854.57   16.14
  -3   3  -3  828.16   16.33
   3  -3   3  843.65   15.85
  -3   3  -3  823.82   15.87
  -3   3  -3  826.72   16.30
  -3   3  -3  890.35   16.35
  -3   3  -3  841.68   15.89
  -3   3  -4  419.68    9.20
  -3  -3  -4  417.65    8.74
  -3   3  -4  414.43    9.41
  -3  -3  -4  407.58    9.12
  -3   3  -4  416.42    9.16
  -3   3  -4  406.23    8.88
  -3   3  -4  403.76    8.86
   3  -3   4  412.76    8.85
  -3   3  -4  411.73    9.29
  -3  -3  -5  436.35    9.44
  -3   3  -5  431.33    9.64
  -3   3  -5  432.97    9.97
  -3   3  -5  425.93    9.27
  -3   3  -5  461.17    9.85
  -3   3  -5  422.25    9.24
   3  -3   5  444.07    9.35
  -3  -3  -5  427.49    9.73
  -3   3  -5  462.77   10.11
  -3   3  -5  404.94    9.79
  -3  -3  -6  596.25   12.54
  -3   3  -6  603.78   12.62
  -3   3  -6  598.04   12.99
   3  -3   6  600.12   12.17
  -3   3  -6  586.54   12.10
  -3   3  -6  595.17   12.14
  -3  -3  -6  613.46   12.83
  -3   3  -6  613.67   12.81
  -3   3  -6  609.54   13.10
   3  -3   7    6.58    0.90
  -3  -3  -7    7.61    1.12
  -3   3  -7    6.98    1.17
  -3   3  -7    6.43    1.04
  -3   3  -7    6.85    1.15
  -3  -3  -7    5.39    1.04
  -3   3  -7    5.82    0.92
  -3   3  -8   11.51    1.10
  -3   3  -8   18.73    1.85
  -3  -3  -8   14.12    1.54
  -3   3  -8   13.73    1.60
  -3   3  -8   13.50    1.16
  -3   3  -8   15.76    1.74
  -3  -3  -8   13.87    1.52
  -3   3  -8   14.00    1.51
  -3  -3  -9   13.60    1.57
  -3  -3  -9   14.15    1.64
  -3   3  -9   12.50    1.66
  -3  -3  -9   14.90    1.64
  -3   3  -9   13.44    1.72
  -3   3  -9   13.19    1.56
  -3   3  -9   14.35    1.78
  -3  -3 -10  763.58   16.38
  -3   3 -10  752.66   16.98
  -3  -3 -10  802.65   16.88
  -3   3 -10  757.50   17.05
  -3   3 -10  762.13   16.96
  -3   3 -10  721.71   16.37
  -3  -3 -11  280.67    8.22
  -3  -3 -11  277.81    8.43
  -3   3 -11  272.60    8.64
  -3   3 -11  284.37    8.83
  -3   3 -11  302.11    8.79
  -3   3 -11  269.94    8.19
  -3   3 -12  736.12   17.10
  -3  -3 -12  745.05   16.60
  -3   3 -12  741.98   17.08
  -3   3 -12  748.11   16.83
  -3   3 -13  129.38    5.25
  -3   3 -13  148.74    6.06
  -3   3 -13  149.52    6.13
  -3   3 -13  140.95    5.77
  -3   3 -14  249.04    8.15
   3   3  14  240.39   10.11
  -3   3 -14  247.61    8.24
  -3   3 -14  247.82    7.91
  -3   3 -15    9.20    1.59
   3   3  15    9.06    2.05
  -3   3 -15   10.30    1.68
  -3   3 -15   10.39    1.58
  -3  -3 -16  185.77    6.36
   3   3  16  180.23    7.29
  -3  -3 -16  177.57    5.85
  -3   3 -16  180.05    6.18
  -3   3 -16  187.03    5.92
  -3   3 -16  176.77    6.14
   3  -3  16  179.22    7.32
  -3  -3 -17   36.35    2.42
  -3   3 -17   33.57    2.19
   3   3  17   32.83    2.59
  -3  -3 -17   30.39    1.97
  -3   3 -17   30.74    2.04
   3  -3  17   31.51    2.61
  -3   3 -17   31.67    1.98
  -3  -3 -18   21.13    1.64
   3  -3  18   17.22    1.61
   3   3  18   16.68    1.54
   3   4 -19    5.13    0.93
  -3   4  19    5.51    0.94
  -3  -4  19    5.08    0.86
   3  -4 -18  463.34   10.59
   3  -4 -18  454.22    9.95
  -3   4  18  438.73   10.88
  -3  -4  18  447.54   10.69
   3  -4 -17    2.87    1.06
   3  -4 -17    1.66    0.76
  -3  -4  17    2.02    1.04
  -3   4  17    3.04    1.14
  -3  -4  16  529.37   13.30
  -3   4  16  524.32   13.65
   3  -4 -16  518.77   12.83
   3  -4 -16  508.66   12.21
   3   4 -16  527.29   13.07
   3  -4 -15  251.67    8.02
   3  -4 -15  224.35    7.24
  -3   4  15  240.84    8.57
   3  -4 -15  227.73    7.67
  -3  -4  15  241.33    8.23
   3   4 -15  228.55    8.25
   3   4 -15  232.78    7.88
   3  -4 -14  469.25   12.19
   3  -4 -14  468.50   11.65
  -3   4  14  464.06   13.15
   3  -4 -14  447.58   11.96
  -3  -4  14  463.87   12.66
  -3  -4  14  438.24   11.05
   3   4 -14  450.93   12.68
   3   4 -14  464.15   12.28
   3  -4 -13  177.17    6.49
   3  -4 -13  146.83    5.01
   3  -4 -13  153.61    5.74
  -3   4  13  168.30    7.08
   3  -4 -13  167.42    6.30
  -3  -4  13  158.16    6.60
   3   4 -13  149.39    6.44
  -3  -4  13  156.17    5.73
   3   4 -13  163.00    6.41
   3   4 -12    0.94    1.02
  -3  -4  12    0.86    1.14
   3  -4 -12    0.43    0.85
   3   4 -12    0.71    0.78
  -3   4  12    0.11    1.09
  -3  -4  12    1.33    0.90
   3  -4 -12    1.73    1.04
   3   4 -12    0.19    0.75
   3  -4 -12    0.61    0.70
   3   4 -12    4.11    1.50
   3  -4 -11  137.98    4.77
   3  -4 -11  137.73    5.20
  -3   4  11  145.35    6.31
   3   4 -11  142.22    5.32
  -3  -4  11  135.88    5.79
  -3  -4  11  138.71    5.34
   3   4 -11  137.37    5.72
   3   4 -11  147.35    5.72
   3   4 -11  137.04    5.26
  -3   4  10  225.12    7.88
   3  -4 -10  205.15    6.51
   3   4 -10  218.34    7.00
   3   4 -10  222.50    7.15
   3   4 -10  218.73    7.18
  -3  -4  10  229.77    7.56
  -3  -4  10  214.65    6.84
   3  -4 -10  213.49    6.20
   3   4 -10  202.58    6.87
   3  -4  -9 2357.60   42.15
  -3   4   9 2318.91   43.81
   3   4  -9 2350.91   43.02
  -3  -4   9 2357.36   42.60
  -3  -4   9 2353.14   43.30
   3   4  -9 2377.42   42.62
   3   4  -9 2408.54   43.00
   3   4  -9 2370.03   43.07
   3   4  -8    0.69    0.75
  -3  -4   8    1.93    0.87
  -3   4   8    1.15    0.83
   3  -4  -8    0.66    0.78
   3   4  -8    1.16    0.87
  -3  -4   7  522.84   12.46
  -3  -4   7  505.09   12.11
  -3  -4   7  512.46   11.74
   3  -4  -7  548.85   12.22
   3   4  -7  521.83   11.52
  -3  -4   7  514.88   12.09
  -3   4   7  520.31   11.96
  -3  -4   7  528.57   12.53
   3   4  -7  534.00   11.78
  -3   4   7  516.73   12.18
  -3   4   6  640.97   12.86
   3   4  -6  659.08   13.61
  -3  -4   6  657.36   14.01
  -3  -4   6  679.41   13.87
   3  -4  -6  662.32   14.24
  -3   4   6  675.80   13.76
  -3  -4   6  655.82   14.51
  -3   4   6  657.19   13.78
  -3  -4   6  655.97   14.53
  -3  -4   6  643.31   13.95
   3  -4  -6  631.13   14.34
  -3   4   6  644.20   12.87
   3   4  -6  631.11   13.33
  -3   4   5   22.68    1.53
  -3  -4   5   24.49    1.77
   3  -4  -5   26.36    2.05
  -3  -4   5   25.47    2.10
   3  -4  -5   22.51    1.90
  -3  -4   5   23.70    1.82
  -3   4   5   22.62    1.50
   3   4  -5   25.61    1.88
  -3  -4   5   22.50    1.98
   3   4  -5   22.90    1.61
   3   4  -5   22.92    1.64
  -3  -4   5   23.71    1.73
  -3   4   5   21.34    1.59
  -3   4   4  109.13    3.58
   3  -4  -4  110.80    4.23
  -3  -4   4  111.08    3.81
   3  -4  -4  114.24    4.21
  -3  -4   4  106.39    4.22
  -3   4   4  110.69    3.67
   3   4  -4  111.29    3.90
  -3   4   4  112.73    3.59
  -3  -4   4  107.68    3.88
  -3  -4   4  112.48    3.86
  -3  -4   4  104.16    4.18
   3   4  -4  105.59    3.44
   3   4  -4  110.71    3.59
   3   4  -3 1332.60   23.93
  -3  -4   3 1238.16   24.61
  -3  -4   3 1304.84   23.74
  -3   4   3 1316.51   23.66
  -3  -4   3 1291.78   24.10
   3   4  -3 1313.86   23.35
  -3   4   3 1324.92   23.77
   3  -4  -3 1322.19   24.60
  -3  -4   3 1268.57   24.64
  -3   4   3 1315.28   23.69
   3  -4  -3 1330.67   25.19
  -3  -4   3 1334.59   24.02
  -3   4   2 3995.36   68.48
  -3   4   2 4011.61   69.26
   3   4  -2 4156.44   68.37
  -3   4   2 4068.58   69.74
   3  -4  -2 4153.62   69.32
  -3   4   2 3997.82   68.46
  -3  -4   2 4009.50   68.72
  -3  -4   2 4201.47   68.72
  -3  -4   2 4117.59   68.22
   3   4  -2 4059.33   67.71
   3  -4  -2 4062.79   69.97
  -3   4   2 3999.79   68.39
  -3  -4   1 1077.61   20.55
  -3  -4   1 1077.99   20.57
   3  -4  -1 1095.33   21.36
  -3  -4   1 1105.38   19.37
  -3   4   1 1087.85   20.82
   3   4  -1 1073.88   18.90
   3   4  -1 1080.68   19.43
  -3   4   1 1061.34   20.55
  -3   4   1 1053.19   19.96
  -3  -4   1 1107.40   20.06
  -3  -4   1 1056.36   20.04
   3  -4  -1 1108.94   20.56
  -3   4   1 1031.28   19.82
  -3   4   1 1073.06   19.96
  -3  -4   0 7313.35  122.32
  -3   4   0 7478.34  122.52
  -3   4   0 7177.24  121.74
  -3   4   0 7383.60  122.42
   3  -4   0 7541.29  122.28
  -3   4   0 7347.18  121.82
   3  -4   0 7576.96  123.44
  -3  -4   0 7240.44  122.25
  -3   4   0 7259.83  121.84
  -3   4  -1  125.12    4.17
  -3  -4  -1  116.63    3.99
   3  -4   1  117.27    3.99
  -3  -4  -1  123.50    2.99
  -3   4  -1  119.22    4.13
  -3  -4  -1  111.95    3.79
   3   4   1  119.70    3.04
  -3  -4  -1  117.78    3.99
  -3   4  -1  118.53    3.85
   3  -4   1  119.51    4.61
  -3   4  -1  117.07    4.09
  -3   4  -1  121.09    3.92
  -3   4  -1  119.43    3.86
   3  -4   2  133.67    4.29
  -3   4  -2  132.12    4.40
  -3  -4  -2  130.75    4.16
  -3  -4  -2  134.11    2.92
  -3   4  -2  137.15    4.51
  -3  -4  -2  127.01    3.11
  -3  -4  -2  131.56    4.16
  -3   4  -2  122.74    4.17
  -3   4  -3    8.79    1.14
  -3   4  -3    7.90    1.03
  -3   4  -3    6.59    1.09
  -3   4  -3    8.71    1.19
  -3  -4  -3    7.06    1.01
  -3  -4  -3    7.98    1.03
  -3   4  -3   10.77    1.23
   3  -4   3    9.12    1.10
  -3   4  -3    8.42    1.07
  -3  -4  -4    2.33    0.77
  -3   4  -4    2.17    0.71
  -3  -4  -4    1.87    0.58
  -3   4  -4    2.79    0.86
  -3   4  -4    3.99    0.94
  -3   4  -4    1.95    0.70
  -3   4  -4    2.28    0.71
   3  -4   4    2.75    0.73
  -3   4  -4    0.92    0.75
  -3   4  -5   51.28    2.77
  -3  -4  -5   54.08    2.50
  -3   4  -5   53.72    2.87
  -3   4  -5   51.89    2.53
  -3   4  -5   51.91    2.77
   3  -4   5   51.79    2.59
  -3   4  -5   54.71    2.95
  -3  -4  -5   52.17    2.60
  -3   4  -5   53.64    2.57
  -3   4  -6  439.96   10.32
  -3  -4  -6  421.97    9.84
  -3  -4  -6  420.11    9.98
  -3   4  -6  416.89   10.48
  -3   4  -6  420.28    9.54
  -3  -4  -6  409.62    9.68
  -3   4  -6  430.50   10.34
   3  -4   6  408.72    9.65
  -3   4  -6  412.62   10.16
  -3   4  -6  421.55    9.52
  -3   4  -7    5.12    1.14
  -3  -4  -7    3.32    0.88
   3  -4   7    2.68    0.74
  -3   4  -7    5.40    1.14
  -3   4  -7    2.10    0.67
  -3   4  -7    3.28    0.93
  -3   4  -7    2.56    0.71
  -3  -4  -7    3.45    0.94
  -3   4  -7    3.16    1.03
  -3   4  -8  604.64   12.71
  -3   4  -8  626.63   14.40
  -3  -4  -8  608.25   13.56
  -3   4  -8  614.11   14.08
  -3   4  -8  626.04   14.01
  -3  -4  -8  590.62   13.43
  -3   4  -8  600.78   12.66
  -3  -4  -8  604.34   13.69
  -3   4  -8  595.47   13.97
  -3   4  -9  192.44    6.57
  -3   4  -9  183.54    5.35
  -3  -4  -9  207.12    6.51
  -3   4  -9  181.90    5.31
  -3   4  -9  190.60    6.69
  -3  -4  -9  192.23    6.32
  -3   4  -9  189.56    6.78
  -3  -4 -10    1.38    1.04
  -3   4 -10    0.17    0.91
  -3   4 -10    1.21    0.93
  -3   4 -10    0.91    1.00
  -3  -4 -11  800.92   17.73
  -3   4 -11  799.28   18.08
  -3   4 -11  786.30   17.73
  -3   4 -11  798.35   18.37
  -3   4 -12   45.76    3.15
  -3   4 -12   47.39    3.36
  -3   4 -12   53.35    3.69
  -3  -4 -12   51.12    3.37
  -3   4 -12   51.07    3.44
  -3  -4 -13  101.07    4.81
  -3   4 -13   94.31    4.76
  -3   4 -13   96.37    4.97
  -3   4 -13  102.91    4.90
  -3   4 -13   92.15    4.46
  -3   4 -14  566.45   13.95
  -3   4 -14  571.19   14.30
   3  -4  14  555.84   16.02
  -3   4 -14  575.65   13.92
  -3   4 -15   13.80    1.82
  -3   4 -15   17.01    1.90
   3   4  15   15.75    2.49
  -3   4 -15   17.32    1.94
  -3   4 -16   95.62    4.02
   3   4  16   92.48    5.02
  -3  -4 -16   97.99    3.95
  -3   4 -16   95.77    4.03
  -3   4 -17  315.70    7.89
   3   4  17  355.53    9.45
  -3  -4 -17  331.37    7.81
   3  -4  17  334.93    9.13
  -3   4 -17  353.44    8.13
   3  -5 -18  101.94    3.63
  -3   5  18   96.78    3.71
  -3  -5  18   94.27    3.55
   3  -5 -18   98.90    3.45
   3   5 -18   97.54    3.83
   3  -5 -17  264.85    7.38
   3  -5 -17  268.93    7.16
  -3   5  17  246.17    7.46
  -3  -5  17  264.54    7.45
   3   5 -17  257.64    7.54
   3  -5 -16   97.32    4.37
   3  -5 -16   93.58    4.08
  -3   5  16   91.50    4.48
  -3  -5  16   97.72    4.47
   3   5 -16   99.11    4.55
   3  -5 -15   50.13    3.27
   3  -5 -15   50.33    3.13
  -3  -5  15   45.38    2.65
  -3   5  15   51.68    3.55
  -3  -5  15   54.32    3.49
   3   5 -15   48.52    3.54
   3   5 -15   57.05    3.59
   3  -5 -14  775.83   16.89
   3   5 -14  778.80   17.55
  -3   5  14  770.99   18.19
   3  -5 -14  748.59   17.12
   3  -5 -14  753.18   17.22
  -3  -5  14  754.68   17.59
  -3  -5  14  760.19   16.48
   3   5 -14  732.05   18.03
   3  -5 -13    1.55    1.10
  -3  -5  13    2.45    1.22
   3  -5 -13    1.17    1.06
   3   5 -13    1.38    0.82
   3  -5 -13    0.94    0.84
  -3   5  13    2.03    1.29
   3   5 -13    1.87    1.26
  -3  -5  13    1.31    0.86
   3   5 -13    1.91    0.85
   3  -5 -12  766.26   16.63
   3   5 -12  716.91   15.95
  -3   5  12  756.26   17.97
   3  -5 -12  731.53   16.81
   3   5 -12  750.37   16.14
  -3  -5  12  719.71   17.22
   3   5 -12  751.71   17.64
   3   5 -12  731.54   16.96
  -3  -5  12  720.32   16.61
   3   5 -11  152.40    5.80
   3  -5 -11  157.99    6.05
  -3   5  11  156.44    6.56
   3   5 -11  157.18    5.85
  -3  -5  11  158.66    6.30
   3  -5 -11  152.89    5.71
  -3  -5  11  162.19    6.06
   3   5 -11  154.72    6.04
   3   5 -11  155.39    6.33
   3  -5 -10   18.61    1.56
   3  -5 -10   17.16    1.87
  -3   5  10   19.41    2.20
   3   5 -10   19.20    2.11
  -3  -5  10   19.32    2.16
  -3  -5  10   16.91    1.93
   3   5 -10   16.01    2.00
   3   5 -10   17.93    2.09
   3   5 -10   16.38    2.02
   3  -5  -9  750.77   16.15
  -3  -5   9  735.37   16.86
  -3   5   9  750.29   17.24
   3   5  -9  783.93   17.12
   3   5  -9  782.52   16.95
  -3  -5   9  757.66   16.64
   3  -5  -9  736.49   15.03
   3   5  -9  741.25   16.92
   3   5  -9  740.69   16.35
   3  -5  -8  443.72   10.83
   3   5  -8  462.93   11.76
   3   5  -8  448.87   10.93
   3   5  -8  451.15   11.68
   3   5  -8  463.52   11.35
  -3   5   8  447.80   11.48
  -3  -5   8  443.33   11.30
  -3  -5   8  463.63   11.28
   3  -5  -7  946.51   19.37
  -3  -5   7  966.49   19.13
  -3   5   7  914.14   18.90
   3   5  -7  896.70   19.53
  -3  -5   7  904.04   19.04
   3   5  -7  925.03   19.67
   3   5  -7  933.93   18.91
   3   5  -7  892.22   18.37
  -3  -5   6    3.85    0.99
   3   5  -6    3.25    0.90
  -3   5   6    4.42    0.81
  -3   5   6    4.83    0.84
  -3  -5   6    3.26    0.87
  -3  -5   6    2.59    0.92
   3   5  -6    4.25    0.93
  -3   5   5  290.50    7.44
   3  -5  -5  294.93    8.43
  -3   5   5  302.23    7.37
  -3  -5   5  329.51    8.27
   3   5  -5  306.32    7.70
   3  -5  -5  311.54    8.56
  -3   5   5  301.24    7.35
  -3  -5   5  297.96    7.96
  -3  -5   5  310.64    8.11
   3   5  -5  299.78    7.34
  -3   5   4    3.81    0.80
   3   5  -4    4.33    0.81
  -3  -5   4    1.13    1.02
  -3  -5   4    2.17    1.10
  -3   5   4    2.98    0.71
   3   5  -4    1.55    0.60
  -3   5   4    3.43    0.77
  -3  -5   4    1.13    0.70
  -3  -5   4    2.30    0.82
   3  -5  -4    0.94    0.70
  -3  -5   4    0.89    0.59
  -3  -5   3 1571.14   31.09
  -3  -5   3 1675.90   29.99
  -3   5   3 1675.05   32.01
  -3   5   3 1701.45   31.19
  -3   5   3 1696.59   29.87
   3  -5  -3 1676.27   31.02
  -3  -5   3 1639.87   30.21
  -3  -5   3 1715.03   30.42
   3   5  -3 1631.98   30.10
  -3   5   3 1688.65   29.73
  -3  -5   3 1589.17   31.11
  -3   5   3 1667.82   29.85
  -3   5   3 1656.17   31.05
   3   5  -3 1652.38   29.49
  -3   5   2    0.34    0.54
   3  -5  -2    1.02    0.71
  -3   5   2    1.36    0.65
  -3  -5   2    0.41    0.53
  -3   5   2    2.03    0.69
  -3  -5   2    2.71    0.84
  -3   5   2    1.58    0.89
  -3  -5   2    0.64    0.60
   3   5  -2    0.65    0.49
   3   5  -2    2.13    0.65
   3   5  -1  864.57   15.61
   3   5  -1  840.98   16.12
  -3  -5   1  829.21   17.34
  -3  -5   1  838.35   15.98
  -3   5   1  849.93   17.70
   3  -5  -1  816.91   17.13
  -3   5   1  842.78   16.51
  -3  -5   1  848.70   16.64
  -3   5   1  848.88   16.41
  -3  -5   1  812.30   17.29
  -3   5   1  847.15   16.55
  -3   5   0  415.73    9.47
   3   5   0  445.82    8.55
  -3  -5   0  392.06   10.02
  -3  -5   0  423.63    9.64
  -3   5   0  440.87   10.44
  -3  -5   0  430.71    8.85
  -3   5   0  429.22    9.68
   3  -5   0  426.00   10.14
  -3  -5   0  409.40   10.15
   3   5   0  423.95    8.94
  -3   5   0  412.93   10.18
  -3   5   0  432.39    9.70
   3  -5   1  682.30   14.31
  -3   5  -1  674.89   14.45
  -3  -5  -1  672.04   12.58
   3  -5   1  654.08   13.77
  -3   5  -1  678.11   13.87
  -3  -5  -1  665.39   13.73
   3   5   1  672.05   12.71
  -3   5  -1  672.14   13.72
  -3  -5  -1  711.30   14.00
  -3   5  -1  669.85   13.85
  -3  -5  -2  120.57    4.17
   3  -5   2  120.18    4.36
  -3   5  -2  121.46    4.48
  -3  -5  -2  103.90    2.60
  -3   5  -2  125.86    4.56
   3   5   2  113.60    4.11
  -3  -5  -2  115.11    3.03
  -3  -5  -2  114.25    3.35
   3  -5   2  116.82    4.42
  -3   5  -2  114.12    4.45
  -3  -5  -2  118.52    4.08
   3   5   2  117.14    4.18
  -3   5  -2  117.94    4.12
  -3   5  -3 1029.32   20.02
  -3  -5  -3  986.37   18.20
  -3  -5  -3 1105.87   19.68
  -3   5  -3 1011.14   19.99
  -3  -5  -3  964.81   17.05
   3   5   3 1027.05   19.18
   3  -5   3  972.05   19.64
  -3   5  -3 1039.20   19.53
   3   5   3  960.83   19.00
  -3  -5  -3 1029.74   19.36
  -3  -5  -3  942.15   17.25
  -3   5  -3  974.61   19.37
   3  -5   3 1008.94   20.44
  -3   5  -3 1031.77   19.51
  -3   5  -4   88.45    3.67
  -3  -5  -4   89.98    3.23
  -3   5  -4   91.65    3.98
  -3   5  -4  100.16    4.12
  -3   5  -4   89.06    3.68
  -3  -5  -4   90.70    3.72
   3  -5   4   95.11    3.89
  -3  -5  -4   97.74    3.76
  -3   5  -4   88.59    3.80
  -3   5  -4   97.69    4.26
  -3   5  -5 1863.29   33.89
  -3  -5  -5 1805.27   32.42
  -3   5  -5 1847.78   33.82
  -3  -5  -5 1814.34   33.23
  -3   5  -5 1851.50   33.14
  -3   5  -5 1841.50   33.10
   3  -5   5 1759.69   33.28
  -3   5  -5 1856.87   34.33
  -3  -5  -5 1832.11   33.09
  -3   5  -5 1720.89   33.34
  -3   5  -6 1004.61   20.30
  -3  -5  -6  959.09   19.06
  -3   5  -6  976.12   20.18
  -3   5  -6  943.35   19.28
  -3  -5  -6  964.51   19.73
  -3   5  -6  973.92   20.62
  -3   5  -6  966.71   19.92
  -3  -5  -6 1007.65   19.57
  -3   5  -6  991.50   19.41
  -3   5  -7  452.66   11.36
  -3  -5  -7  443.07   10.50
  -3   5  -7  417.90   11.11
  -3   5  -7  442.43   10.39
  -3   5  -7  436.18   11.58
  -3   5  -7  434.58   10.34
  -3   5  -7  448.05   11.20
  -3  -5  -7  447.80   10.74
  -3  -5  -7  428.00   10.80
  -3   5  -8    0.81    1.04
  -3  -5  -8    3.47    1.16
  -3  -5  -8    0.72    0.82
  -3   5  -8   -0.08    0.81
  -3   5  -8    0.34    0.65
  -3   5  -8    0.91    0.71
  -3  -5  -8    0.70    0.87
  -3   5  -8    0.95    1.06
  -3   5  -9 4929.80   85.81
  -3  -5  -9 5064.05   87.04
  -3   5  -9 5037.00   87.90
  -3   5  -9 5113.19   87.85
  -3  -5  -9 5273.41   87.17
  -3   5  -9 4894.77   85.76
  -3  -5  -9 5065.63   87.06
  -3   5  -9 4964.39   88.47
  -3   5 -10  167.54    6.48
  -3  -5 -10  177.52    6.28
  -3   5 -10  168.93    6.45
  -3  -5 -10  161.24    5.94
  -3   5 -10  156.42    5.00
  -3  -5 -10  176.02    6.21
  -3   5 -10  165.52    6.77
  -3   5 -10  155.88    5.01
  -3   5 -10  163.03    6.41
  -3  -5 -11 4528.19   76.45
  -3  -5 -11 4573.95   76.58
  -3   5 -11 4307.49   76.87
  -3   5 -11 4165.52   76.76
  -3   5 -11 4291.69   77.73
  -3  -5 -12  321.83    9.39
  -3  -5 -12  330.53    9.45
  -3   5 -12  333.77    9.77
   3  -5  12  323.90   11.57
  -3   5 -12  289.43    9.26
  -3   5 -12  323.05   10.10
  -3  -5 -13    3.39    1.29
  -3  -5 -13    2.89    1.21
  -3   5 -13    5.53    1.37
   3  -5  13    4.19    1.74
  -3   5 -13    2.57    0.98
  -3   5 -13    2.64    1.27
  -3  -5 -14  144.37    5.51
  -3   5 -14  119.91    5.08
  -3   5 -14  110.04    5.27
   3  -5  14  131.82    6.47
  -3   5 -14  130.56    5.38
  -3  -5 -15  772.99   16.15
   3   5  15  712.25   18.52
  -3   5 -15  709.76   15.61
   3  -5  15  714.60   17.47
  -3   5 -15  717.24   15.90
  -3  -5 -16   23.43    1.94
  -3   5 -16   21.14    1.68
   3   5  16   23.95    2.50
  -3   5 -16   24.68    1.95
   3  -5  17    2.00    0.81
  -3  -5 -17    3.37    0.79
   3   5  17    3.76    1.05
  -3   5 -17    3.30    0.76
   3   6 -18   15.19    1.37
   3  -6 -17   27.42    1.87
   3  -6 -17   27.25    1.88
  -3   6  17   24.17    1.77
  -3  -6  17   26.70    1.82
   3   6 -17   28.64    2.08
   3  -6 -16  478.89   11.07
  -3   6  16  441.73   11.00
  -3  -6  16  467.94   11.02
   3  -6 -16  469.59   11.11
   3   6 -16  484.18   11.55
   3  -6 -15    5.06    1.23
  -3  -6  15    5.62    1.26
   3  -6 -15    6.04    1.30
  -3  -6  15    6.79    1.09
  -3   6  15    6.50    1.32
   3   6 -15    5.81    1.35
   3  -6 -14  324.91    9.26
   3  -6 -14  332.00    9.17
  -3   6  14  308.81    9.35
   3  -6 -14  301.65    9.01
   3   6 -14  319.45    9.96
  -3  -6  14  324.30    9.35
  -3  -6  14  312.18    8.71
   3   6 -14  334.84    9.54
   3  -6 -13 1538.23   29.43
  -3   6  13 1491.64   29.84
   3  -6 -13 1462.45   29.13
   3   6 -13 1431.49   27.79
  -3  -6  13 1448.52   28.83
  -3  -6  13 1458.91   29.43
   3   6 -13 1551.25   29.64
   3   6 -13 1489.27   30.32
   3  -6 -13 1541.45   29.14
   3   6 -13 1450.04   27.81
   3   6 -12  105.11    4.56
  -3  -6  12  103.06    4.79
   3   6 -12  102.38    5.19
  -3   6  12   97.61    4.98
   3  -6 -12   98.37    4.73
  -3  -6  12  106.94    5.07
   3  -6 -12  109.08    4.83
   3   6 -12  101.39    4.87
   3   6 -12  100.75    4.46
   3   6 -11   76.43    4.39
  -3  -6  11   75.43    4.11
   3  -6 -11   74.56    3.93
   3  -6 -11   73.58    4.05
  -3   6  11   74.69    4.26
   3   6 -11   75.34    4.00
  -3  -6  11   69.97    4.04
   3   6 -11   74.35    4.08
   3   6 -11   73.86    3.94
   3  -6 -10  443.28   11.12
   3  -6 -10  413.76   11.26
  -3   6  10  416.44   11.44
   3   6 -10  422.32   11.36
  -3  -6  10  420.43   11.41
   3   6 -10  423.79   11.64
   3   6 -10  416.79   11.34
   3   6 -10  423.43   11.09
  -3  -6  10  419.55   11.30
   3  -6  -9   11.84    1.65
  -3  -6   9   10.56    1.68
   3   6  -9   11.25    1.82
  -3   6   9    9.84    1.55
   3  -6  -9    9.98    1.67
  -3  -6   9   10.22    1.58
   3   6  -9   10.19    1.81
   3   6  -9   13.63    1.82
   3   6  -9   12.67    1.69
  -3  -6   8  977.55   20.17
   3   6  -8  932.74   20.55
  -3   6   8  903.59   19.49
   3   6  -8  935.91   20.60
   3  -6  -8  938.57   19.46
  -3  -6   8  949.71   20.03
   3   6  -8  934.19   19.31
   3   6  -8  958.98   20.14
  -3  -6   7 1743.92   33.40
   3   6  -7 1795.28   34.38
  -3  -6   7 1774.83   33.34
   3   6  -7 1770.58   34.28
   3   6  -7 1717.25   32.46
   3   6  -7 1821.37   33.39
  -3   6   6  547.64   11.79
  -3  -6   6  552.93   12.87
  -3  -6   6  538.77   12.74
  -3   6   6  541.53   11.72
   3   6  -6  525.64   11.88
   3   6  -6  561.41   12.67
   3   6  -5  148.69    5.83
  -3   6   5  137.81    4.59
   3  -6  -5  146.01    5.77
   3   6  -5  133.86    4.45
  -3  -6   5  141.49    5.16
  -3  -6   5  153.14    5.41
   3   6  -5  145.30    5.78
  -3   6   5  140.38    4.60
   3   6  -5  142.70    4.98
  -3  -6   4  751.12   15.75
  -3   6   4  743.73   14.98
  -3  -6   4  692.34   15.38
   3   6  -4  736.36   16.41
  -3   6   4  733.48   14.91
  -3  -6   4  708.73   15.42
   3   6  -4  766.74   16.57
   3   6  -4  721.81   15.02
  -3   6   4  708.80   14.57
  -3   6   3  179.33    6.18
   3   6  -3  163.14    5.02
  -3  -6   3  159.84    5.27
   3   6  -3  166.12    6.08
  -3   6   3  169.00    6.11
  -3   6   3  170.61    5.26
   3   6  -3  165.02    6.08
  -3  -6   3  163.26    5.39
  -3   6   3  166.32    4.96
  -3   6   3  165.18    5.21
   3  -6  -2   16.01    1.74
   3   6  -2   14.66    1.29
  -3   6   2   12.19    1.65
  -3  -6   2   12.08    1.40
  -3   6   2   13.32    1.75
  -3  -6   2   11.47    1.26
  -3   6   2   13.02    1.85
   3   6  -2   14.95    1.85
  -3   6   2   14.19    1.47
   3   6  -2   13.84    1.85
  -3   6   2   12.35    1.27
  -3   6   2   12.44    1.39
  -3  -6   1 2357.20   41.82
   3   6  -1 2413.29   40.82
   3  -6  -1 2274.75   42.70
  -3   6   1 2429.43   43.74
  -3   6   1 2395.61   42.97
  -3  -6   1 2273.72   41.14
   3   6  -1 2331.50   42.81
  -3   6   1 2389.45   41.85
  -3   6   1 2315.98   41.34
   3   6  -1 2353.23   42.85
  -3   6   1 2415.90   41.93
  -3  -6   0 2528.31   43.36
   3  -6   0 2356.41   43.81
  -3  -6   0 2439.21   42.94
   3   6   0 2408.79   43.71
  -3   6   0 2492.69   44.50
   3   6   0 2372.09   43.67
  -3  -6   0 2360.71   41.96
  -3   6   0 2421.61   43.04
  -3   6   0 2460.42   42.73
  -3   6   0 2452.59   43.09
   3  -6   1  680.30   15.35
  -3   6  -1  699.59   15.71
   3   6   1  686.85   15.06
  -3  -6  -1  683.91   13.53
  -3   6  -1  728.14   14.95
   3  -6   1  691.29   14.56
  -3  -6  -1  732.74   15.01
  -3   6  -1  740.03   14.97
  -3  -6  -1  681.47   14.61
   3   6   1  682.79   15.03
  -3   6  -1  686.06   14.53
  -3  -6  -2   17.49    1.65
  -3   6  -2   18.17    1.90
  -3   6  -2   23.14    1.86
   3   6   2   16.62    1.66
  -3  -6  -2   16.15    1.13
  -3   6  -2   19.67    1.79
  -3   6  -2   18.10    1.73
  -3  -6  -2   17.89    1.72
   3   6   2   16.82    1.69
   3  -6   2   16.13    1.66
   3  -6   2   17.05    1.80
  -3   6  -3   23.55    2.14
  -3   6  -3   24.57    2.17
   3   6   3   21.30    1.75
   3  -6   3   23.51    2.15
  -3  -6  -3   22.36    1.90
   3   6   3   21.81    1.76
  -3  -6  -3   21.93    1.86
  -3   6  -3   21.42    1.85
  -3   6  -4    9.11    1.35
  -3  -6  -4   10.39    1.09
   3  -6   4   11.07    1.65
  -3   6  -4    9.70    1.51
  -3   6  -4   11.73    1.49
  -3   6  -4   11.41    1.61
  -3  -6  -4   10.75    1.36
  -3   6  -4   10.45    1.48
  -3  -6  -4   10.38    1.40
  -3   6  -5  308.63    8.96
  -3  -6  -5  302.57    7.57
  -3   6  -5  307.83    8.91
  -3   6  -5  297.00    9.12
  -3   6  -5  303.04    8.37
   3  -6   5  309.28    9.62
  -3  -6  -5  305.20    8.42
  -3  -6  -5  308.50    8.26
  -3   6  -5  303.36    8.49
  -3   6  -5  304.73    8.40
  -3   6  -6   72.59    3.94
  -3   6  -6   65.57    3.96
  -3  -6  -6   71.07    3.20
  -3   6  -6   67.29    3.79
  -3   6  -6   68.00    3.49
  -3  -6  -6   69.93    3.57
   3  -6   6   71.28    4.39
  -3   6  -6   74.48    3.81
  -3  -6  -6   69.87    3.48
  -3   6  -6   71.79    3.55
  -3   6  -7  611.43   14.55
  -3   6  -7  620.95   14.98
  -3  -6  -7  619.40   14.29
  -3   6  -7  617.67   15.32
  -3  -6  -7  619.64   13.69
  -3   6  -7  620.85   14.84
  -3   6  -7  616.45   13.94
  -3   6  -7  620.28   13.94
   3  -6   7  636.46   16.48
  -3  -6  -7  642.25   14.24
  -3   6  -8  173.48    6.60
  -3  -6  -8  166.83    5.72
   3  -6   8  174.36    7.61
  -3   6  -8  160.62    6.31
  -3   6  -8  167.95    5.71
  -3  -6  -8  165.88    5.98
  -3  -6  -8  163.58    6.02
  -3   6  -8  172.76    6.41
  -3   6  -8  165.50    6.79
  -3   6  -8  161.90    5.64
  -3  -6  -9   17.93    2.04
  -3   6  -9   13.48    1.56
  -3  -6  -9   14.46    1.73
  -3   6  -9   16.92    2.10
   3  -6   9   20.74    2.76
  -3   6  -9   13.73    1.56
  -3   6  -9   11.25    1.78
  -3  -6  -9   14.37    1.84
  -3   6  -9   11.12    1.90
  -3   6  -9   16.06    2.11
  -3   6 -10   76.94    3.49
  -3  -6 -10   84.10    4.20
  -3   6 -10   86.63    4.62
  -3   6 -10   79.78    4.73
  -3  -6 -10   84.81    4.17
  -3   6 -10   79.30    4.31
   3  -6  10   81.48    5.30
  -3   6 -10   80.36    3.54
  -3  -6 -10   79.35    4.02
  -3   6 -10   81.45    4.49
  -3   6 -11   53.74    3.61
  -3  -6 -11   59.76    3.49
  -3   6 -11   55.96    3.64
   3  -6  11   53.21    4.37
  -3  -6 -11   62.70    3.67
  -3   6 -11   55.16    3.94
  -3   6 -11   56.56    3.74
   3  -6  12  291.38   10.46
  -3   6 -12  267.42    8.75
  -3  -6 -12  300.05    8.83
  -3  -6 -12  279.36    8.47
  -3   6 -12  279.01    8.71
  -3   6 -12  310.31    9.26
  -3   6 -13   12.19    1.82
  -3  -6 -13   13.81    1.82
  -3  -6 -13   11.21    1.67
  -3   6 -13   14.98    1.82
  -3   6 -13   15.59    1.98
   3  -6  13   12.63    2.24
  -3  -6 -14    4.62    1.15
  -3   6 -14    3.77    1.00
   3  -6  14    4.55    1.49
  -3  -6 -15    1.89    0.89
   3   6  15    1.32    1.24
   3  -6  15    1.86    1.09
  -3  -6 -16   57.55    2.71
   3   6  16   58.54    3.46
   3  -6  16   52.42    3.04
  -3   6 -16   58.73    2.80
   3  -7 -17   35.94    1.98
   3   7 -17   35.70    2.02
   3  -7 -16  285.55    7.45
   3  -7 -16  283.47    7.24
   3   7 -16  286.29    7.58
   3  -7 -15    0.06    0.72
   3  -7 -15    0.82    0.79
  -3  -7  15    0.44    0.51
  -3  -7  15    0.66    0.75
   3   7 -15    0.26    0.86
   3   7 -14    6.39    1.36
   3  -7 -14    6.91    1.27
   3  -7 -14    7.82    1.40
  -3   7  14    6.40    1.12
  -3  -7  14    6.26    1.17
  -3  -7  14    6.91    1.26
   3   7 -13    1.42    0.79
   3  -7 -13    0.86    0.88
  -3  -7  13    1.05    0.85
   3   7 -13    2.61    1.12
  -3  -7  13    2.24    1.01
   3   7 -13    2.33    0.84
  -3   7  13    2.27    0.93
   3  -7 -13    1.56    0.88
   3   7 -13    2.36    1.21
   3  -7 -13    2.99    1.13
   3  -7 -12  373.25    9.97
   3  -7 -12  351.72    9.92
  -3   7  12  322.38    9.32
   3   7 -12  360.60    9.54
   3   7 -12  352.07    9.47
  -3  -7  12  344.99    9.85
   3   7 -12  349.11    9.87
  -3  -7  12  359.38    9.99
   3   7 -12  337.68   10.42
  -3  -7  11    3.64    1.16
  -3   7  11    2.86    0.97
   3  -7 -11    1.62    1.15
   3  -7 -11    2.52    1.05
  -3  -7  11    3.12    1.13
   3   7 -11    2.87    1.17
   3   7 -11    1.57    1.08
   3   7 -11    1.81    1.07
   3   7 -11    2.71    1.23
   3  -7 -10    4.19    1.34
   3  -7 -10    4.72    1.28
   3   7 -10    2.32    1.14
   3   7 -10    4.02    1.37
  -3  -7  10    4.76    1.37
  -3  -7  10    5.23    1.32
   3   7 -10    2.84    1.21
   3   7 -10    4.18    1.38
   3   7  -9  284.75    8.96
   3  -7  -9  284.73    8.54
   3  -7  -9  276.08    8.78
   3   7  -9  286.96    9.05
  -3  -7   9  277.32    8.60
   3   7  -9  274.12    8.19
  -3  -7   9  286.60    8.85
   3   7  -9  284.35    9.00
   3  -7  -8  147.85    5.64
   3   7  -8  147.25    6.16
   3  -7  -8  143.14    5.97
  -3  -7   8  146.07    5.94
  -3  -7   8  142.31    5.67
   3   7  -8  148.23    5.91
   3   7  -8  152.49    6.23
   3   7  -8  139.43    5.21
  -3  -7   7  229.25    7.38
  -3  -7   7  238.77    7.68
   3   7  -7  218.46    6.66
   3   7  -7  237.80    7.59
  -3   7   6    4.65    0.96
   3   7  -6    4.18    1.12
  -3   7   6    4.48    0.94
  -3  -7   6    4.34    1.30
  -3  -7   6    5.29    1.29
   3   7  -6    4.39    0.96
  -3   7   5  198.07    5.98
   3   7  -5  199.51    7.22
  -3  -7   5  193.41    6.46
   3   7  -5  192.97    7.13
  -3   7   5  199.12    5.97
  -3  -7   5  200.84    6.76
   3   7  -5  194.94    6.35
  -3   7   4    6.55    1.13
   3   7  -4    5.98    1.54
   3   7  -4    0.57    0.68
   3   7  -4    6.23    1.55
  -3   7   4    5.72    1.10
  -3  -7   4    1.13    0.80
  -3  -7   3    2.69    0.91
  -3   7   3    0.25    0.71
   3   7  -3    0.09    1.02
  -3   7   3   14.57    1.94
   3   7  -3    0.11    0.52
  -3   7   3   14.79    1.92
  -3   7   3    0.24    0.70
   3   7  -3    0.43    1.05
  -3  -7   2  683.20   15.04
  -3   7   2  671.69   15.91
   3   7  -2  658.93   14.07
  -3  -7   2  673.21   14.67
  -3  -7   2  620.26   14.29
   3   7  -2  685.08   15.67
  -3   7   2  709.22   16.09
  -3   7   2  675.02   14.65
   3   7  -2  684.89   15.69
  -3   7   2  662.79   13.90
  -3   7   2  693.89   14.74
  -3  -7   1  283.56    8.03
  -3   7   1  287.30    8.71
  -3  -7   1  259.44    7.22
  -3   7   1  280.42    9.25
  -3   7   1  274.85    8.62
   3   7  -1  270.40    8.28
  -3   7   1  270.90    7.70
  -3  -7   1  269.32    7.60
   3   7  -1  267.11    8.23
  -3   7   1  267.51    7.19
  -3   7   1  275.11    7.74
  -3   7   0  187.86    6.72
  -3   7   0  188.84    6.77
  -3   7   0  190.42    7.18
  -3  -7   0  177.40    5.39
   3   7   0  187.05    6.43
  -3  -7   0  194.27    6.28
  -3   7   0  182.35    6.03
  -3  -7   0  180.19    5.84
   3   7   0  183.13    6.38
  -3   7   0  161.06    5.41
  -3   7   0  184.72    6.07
   3   7   1   43.88    2.85
  -3   7  -1   42.45    2.57
  -3   7  -1   46.79    3.37
   3   7   1   41.14    2.76
  -3   7  -1   49.34    2.93
  -3  -7  -1   51.25    3.02
   3  -7   1   40.20    2.44
  -3  -7  -1   43.25    2.66
  -3   7  -1   48.92    2.93
  -3  -7  -2  970.85   19.94
  -3   7  -2  973.72   21.05
   3   7   2  929.16   19.51
  -3   7  -2  989.75   19.96
   3  -7   2  943.77   19.60
  -3   7  -2  964.31   19.44
  -3  -7  -2  953.43   19.54
   3   7   2  932.91   19.54
  -3   7  -2 1008.80   20.03
  -3  -7  -3  519.05   12.10
  -3   7  -3  518.76   13.27
   3   7   3  508.13   11.68
  -3  -7  -3  540.06   12.48
   3   7   3  500.78   11.65
   3  -7   3  519.00   12.69
  -3   7  -3  507.76   12.11
  -3  -7  -4   16.75    1.36
  -3   7  -4   12.00    1.61
  -3   7  -4   12.40    1.84
  -3   7  -4   12.01    1.65
   3  -7   4   12.95    1.82
  -3  -7  -4   11.33    1.59
  -3  -7  -4   12.25    1.56
  -3   7  -4   13.59    1.70
  -3   7  -5   47.83    3.32
  -3   7  -5   45.53    3.29
  -3  -7  -5   47.14    2.46
  -3   7  -5   47.36    3.09
  -3   7  -5   47.74    3.08
  -3   7  -5   46.15    3.04
  -3  -7  -5   51.21    3.15
  -3  -7  -5   52.73    3.07
   3  -7   5   45.65    3.37
  -3  -7  -6   11.97    1.67
  -3  -7  -6   13.43    1.40
  -3   7  -6   11.75    1.68
   3  -7   6   10.05    1.83
  -3   7  -6   12.63    1.84
  -3   7  -6   13.55    1.74
  -3   7  -6   11.95    1.85
  -3  -7  -6   16.06    1.88
  -3   7  -6   13.71    1.83
   3  -7   7  794.44   19.24
  -3  -7  -7  760.97   17.53
  -3   7  -7  808.28   18.59
  -3  -7  -7  793.07   16.57
  -3   7  -7  782.05   18.19
  -3   7  -7  813.53   17.48
  -3   7  -7  798.14   17.42
  -3   7  -7  796.40   17.80
  -3  -7  -7  823.11   17.47
  -3   7  -8  124.00    5.79
  -3  -7  -8  128.69    4.94
  -3   7  -8  130.17    5.70
  -3   7  -8  128.42    5.13
  -3  -7  -8  138.21    5.46
  -3  -7  -8  133.45    5.37
   3  -7   8  138.66    6.61
  -3   7  -8  140.48    5.81
  -3   7  -8  128.88    5.15
  -3   7  -9    7.35    1.27
  -3  -7  -9    3.95    1.26
  -3  -7  -9    3.64    1.13
  -3  -7  -9    4.50    1.10
  -3   7  -9    5.88    1.44
  -3   7  -9    4.88    1.34
  -3   7  -9    7.01    1.27
   3  -7   9    3.81    1.46
  -3   7  -9    5.44    1.48
  -3   7 -10  148.16    5.22
  -3  -7 -10  155.23    5.68
  -3  -7 -10  166.04    6.08
  -3   7 -10  148.91    6.08
   3  -7  10  161.93    7.32
  -3   7 -10  145.72    5.17
  -3  -7 -10  156.81    5.77
  -3   7 -10  150.69    6.40
  -3   7 -10  162.35    6.37
  -3  -7 -11   48.40    3.18
  -3   7 -11   51.47    3.50
  -3  -7 -11   51.87    3.11
  -3   7 -11   52.11    3.36
  -3   7 -11   45.18    2.45
   3  -7  11   53.93    4.10
  -3   7 -11   44.73    2.47
  -3   7 -11   48.65    3.41
  -3  -7 -12   98.92    4.56
  -3  -7 -12   94.80    4.23
   3  -7  12   98.92    5.36
  -3   7 -12   96.36    4.44
  -3   7 -12  101.31    4.79
  -3  -7 -13  335.06    9.16
  -3  -7 -13  335.28    8.87
  -3   7 -13  326.03    8.82
   3  -7  13  340.15   10.38
  -3   7 -13  348.68    9.53
  -3  -7 -14  134.77    4.71
   3  -7  14  136.02    5.67
  -3   7 -14  135.47    5.06
  -3  -7 -15  152.50    4.69
   3   7  15  147.44    6.05
   3  -7  15  155.48    5.46
  -3   7 -15  157.68    5.06
   3  -8 -16  278.92    6.70
   3   8 -16  255.10    6.38
   3  -8 -15    2.13    0.71
   3  -8 -15    3.83    0.95
  -3  -8  15    2.48    0.66
   3   8 -15    3.60    0.89
   3  -8 -14  100.18    4.00
   3  -8 -14   99.73    4.15
   3   8 -14   94.00    3.93
  -3  -8  14   94.35    3.77
   3  -8 -13   17.83    1.94
   3   8 -13   12.59    1.39
  -3  -8  13   13.44    1.63
  -3  -8  13   14.86    1.55
   3  -8 -13   11.35    1.52
   3   8 -13   12.17    1.37
   3   8 -13   11.10    1.50
   3  -8 -12  288.76    8.43
  -3  -8  12  280.12    7.94
   3   8 -12  279.02    7.98
  -3  -8  12  278.28    8.31
   3   8 -12  278.42    8.04
   3   8 -12  278.00    7.94
   3   8 -11  189.50    7.16
   3  -8 -11  201.86    6.77
   3  -8 -11  180.76    6.63
   3   8 -11  194.16    6.70
  -3  -8  11  194.49    6.49
  -3  -8  11  197.32    6.89
   3   8 -11  183.46    6.30
   3   8 -11  186.27    6.60
   3  -8 -10   11.54    1.73
   3   8 -10   11.13    1.74
  -3  -8  10   11.80    1.65
   3   8 -10    9.24    1.64
   3   8 -10   12.48    1.84
   3  -8 -10    9.41    1.56
  -3  -8  10    8.49    1.56
   3   8 -10    9.99    1.52
   3   8  -9  203.09    7.38
   3  -8  -9  207.03    7.04
   3   8  -9  206.29    7.44
  -3  -8   9  203.18    7.29
   3  -8  -9  183.14    7.05
  -3  -8   9  200.57    6.80
   3   8  -9  199.51    7.30
   3   8  -9  198.00    6.41
   3   8  -8   66.41    3.95
   3   8  -8   64.69    4.10
   3  -8  -8   63.80    3.70
   3  -8  -8   67.93    4.06
  -3  -8   8   68.56    4.03
   3   8  -8   63.22    4.09
  -3  -8   8   67.27    3.70
   3   8  -8   63.29    3.24
  -3  -8   7   11.41    1.75
   3  -8  -7   12.48    1.94
   3   8  -7   10.95    1.65
  -3  -8   7   16.91    1.91
   3   8  -6  566.90   13.75
   3  -8  -6  530.08   14.33
   3   8  -6  574.06   14.54
  -3   8   6  566.92   12.60
  -3  -8   6  572.79   13.47
  -3   8   6  575.68   12.69
   3   8  -6  574.74   14.52
  -3   8   5  405.63   10.10
   3   8  -5  410.17   10.68
  -3  -8   5  414.26   10.60
   3   8  -5  398.22   11.53
  -3   8   5  408.50   10.08
   3   8  -5  405.68   11.59
   3   8  -4  697.66   15.44
  -3   8   4  679.06   15.13
   3   8  -4  712.95   16.71
  -3   8   4  687.58   15.14
  -3  -8   4  689.06   15.44
   3   8  -4  719.35   16.77
  -3   8   3  353.98    9.37
  -3  -8   3  364.24   10.03
   3   8  -3  345.34    9.11
  -3   8   3  344.56    9.29
  -3   8   3  333.06   10.56
   3   8  -3  347.94   10.32
  -3  -8   3  354.72    9.42
   3   8  -3  351.64   10.36
  -3   8   2  293.19    9.63
   3   8  -2  299.18    9.19
  -3   8   2  307.42    9.76
  -3   8   2  303.34    8.52
  -3  -8   2  300.07    8.92
  -3  -8   2  292.27    8.33
   3   8  -2  309.73    9.31
  -3   8   2  297.42    8.50
  -3   8   1  853.53   19.32
   3   8  -1  808.74   18.42
  -3   8   1  841.72   19.35
  -3   8   1  842.96   17.95
  -3   8   1  844.37   17.97
  -3  -8   1  858.68   18.32
  -3  -8   1  817.94   17.55
   3   8  -1  793.01   18.35
  -3   8   0  150.31    6.39
  -3   8   0  160.04    6.58
   3   8   0  147.22    5.82
  -3   8   0  146.56    5.61
  -3   8   0  147.05    5.05
  -3  -8   0  149.62    5.77
  -3  -8   0  146.20    5.40
   3   8   0  144.02    5.77
  -3   8   0  155.68    5.77
  -3   8  -1  569.98   14.28
  -3   8  -1  567.71   14.37
  -3   8  -1  528.11   14.54
   3   8   1  551.90   13.07
  -3   8  -1  545.29   13.21
   3  -8   1  523.29   12.18
  -3  -8  -1  558.46   13.37
   3   8   1  532.57   12.93
  -3  -8  -1  546.34   12.71
  -3   8  -1  498.29   12.15
  -3   8  -1  543.86   13.20
  -3   8  -2  502.66   13.50
   3  -8   2  486.36   12.03
  -3   8  -2  500.89   13.95
   3   8   2  497.32   12.05
  -3   8  -2  522.24   12.76
  -3   8  -2  498.93   11.98
  -3  -8  -2  532.32   12.78
  -3  -8  -2  516.95   12.21
   3   8   2  511.84   12.13
  -3   8  -2  532.72   12.83
   3  -8   3  552.86   13.48
  -3   8  -3  547.78   13.12
  -3  -8  -3  578.27   13.74
  -3   8  -3  589.26   15.05
  -3  -8  -3  581.23   13.28
   3   8   3  548.03   12.62
  -3   8  -3  579.71   13.83
   3   8   3  551.62   12.64
  -3   8  -3  598.77   13.96
   3  -8   4   15.86    1.97
  -3   8  -4   14.43    2.13
  -3   8  -4   14.57    1.77
  -3  -8  -4   17.64    2.01
  -3  -8  -4   15.88    1.82
   3  -8   5  193.11    7.18
  -3  -8  -5  199.44    6.84
  -3   8  -5  187.02    7.37
  -3   8  -5  185.34    7.35
  -3   8  -5  194.95    6.89
  -3   8  -5  187.13    6.60
  -3  -8  -5  194.62    6.55
  -3   8  -5  187.37    6.79
  -3   8  -6  109.59    5.48
  -3  -8  -6  103.88    3.98
  -3  -8  -6  120.54    5.14
  -3   8  -6  112.16    5.49
  -3   8  -6  112.86    5.03
   3  -8   6  124.57    5.74
  -3   8  -6  111.32    5.00
  -3   8  -6  112.95    5.06
  -3  -8  -6  122.57    4.98
  -3   8  -7    9.22    1.54
  -3  -8  -7    8.59    1.56
  -3  -8  -7    7.34    1.12
  -3   8  -7    8.98    1.72
  -3  -8  -7    7.83    1.48
  -3   8  -7    7.03    1.57
  -3   8  -7    8.12    1.47
   3  -8   7    7.59    1.72
  -3   8  -7    7.56    1.51
  -3   8  -8   21.68    2.46
  -3  -8  -8   19.89    1.81
  -3   8  -8   20.64    2.31
  -3   8  -8   21.62    2.10
   3  -8   8   19.56    2.53
  -3  -8  -8   19.80    2.09
  -3   8  -8   21.67    2.32
  -3   8  -8   16.77    1.92
  -3   8  -9  217.87    8.02
  -3  -8  -9  213.59    6.61
  -3  -8  -9  215.53    7.02
  -3   8  -9  211.62    7.52
   3  -8   9  225.02    8.48
  -3   8  -9  215.40    6.85
  -3   8  -9  222.69    6.96
  -3   8  -9  232.11    7.68
  -3  -8  -9  237.46    7.41
  -3   8 -10    9.93    1.34
  -3   8 -10    7.71    1.60
  -3  -8 -10    9.42    1.53
  -3  -8 -10    8.50    1.30
  -3   8 -10   10.35    1.59
  -3   8 -10    7.58    1.52
  -3   8 -10    8.99    1.31
   3  -8  10    8.53    1.81
  -3  -8 -10    9.91    1.43
  -3   8 -11   45.96    2.42
  -3  -8 -11   50.90    3.15
  -3  -8 -11   48.76    2.77
  -3   8 -11   51.61    3.15
  -3   8 -11   46.77    2.43
   3  -8  11   48.02    3.58
  -3   8 -11   52.16    3.34
  -3  -8 -12  529.53   12.40
  -3  -8 -12  516.11   11.68
   3  -8  12  516.45   13.36
  -3   8 -12  533.33   12.70
  -3   8 -13  224.70    6.73
  -3  -8 -13  207.94    5.91
   3  -8  13  225.02    7.20
  -3   8 -14   33.75    2.04
  -3  -8 -14   31.41    1.80
   3   8  14   31.49    2.76
   3  -8  14   36.05    2.38
  -3   8 -14   37.11    2.27
   3  -9 -15  372.36    8.36
  -3  -9  14    0.66    0.52
   3  -9 -14    0.25    0.53
   3  -9 -14    0.55    0.67
   3   9 -14    1.91    0.61
  -3  -9  13  193.88    5.77
   3  -9 -13  195.89    5.72
   3  -9 -13  195.51    5.99
   3   9 -13  179.70    5.17
   3   9 -13  185.49    5.30
   3   9 -13  178.25    5.17
   3   9 -12  210.03    6.30
  -3  -9  12  223.41    6.74
   3  -9 -12  223.46    6.75
   3   9 -12  214.06    6.37
   3   9 -12  205.91    6.00
  -3  -9  11   48.16    3.07
   3  -9 -11   50.63    3.09
   3   9 -11   53.11    3.16
   3   9 -11   48.39    3.00
   3   9 -10  340.34    9.66
  -3  -9  10  343.56    9.69
  -3  -9  10  340.56    8.79
   3   9 -10  351.74    9.76
  -3  -9   9    0.86    1.05
   3   9  -9    1.15    1.07
   3   9  -9    0.45    0.78
  -3  -9   9    0.90    0.75
   3  -9  -9    0.97    0.91
   3   9  -9   -0.09    1.12
   3   9  -8   82.53    4.34
   3  -9  -8   83.92    4.53
  -3  -9   8   79.20    4.30
  -3  -9   8   81.95    3.87
   3  -9  -7   24.49    2.54
  -3  -9   7   20.96    2.00
   3   9  -7   22.02    2.21
  -3   9   6   65.38    3.24
   3  -9  -6   66.85    3.72
   3   9  -6   69.39    3.82
   3  -9  -6   62.91    4.13
  -3  -9   6   70.62    3.60
   3   9  -6   68.14    4.25
  -3   9   6   62.15    3.14
   3   9  -6   68.87    4.26
  -3   9   5    4.44    1.07
   3  -9  -5    4.61    1.51
   3   9  -5    6.90    1.75
  -3   9   5    4.91    1.08
  -3  -9   5    4.80    1.19
   3   9  -5    6.57    1.70
  -3   9   4  796.15   17.16
  -3  -9   4  812.49   18.16
   3   9  -4  776.72   18.42
  -3   9   4  797.35   17.10
  -3  -9   4  786.14   17.06
   3   9  -4  806.36   18.56
  -3   9   3    1.28    0.99
   3   9  -3    3.15    1.38
   3   9  -3    2.56    1.34
  -3   9   3    2.23    1.03
  -3  -9   3    0.53    1.10
  -3  -9   3    1.12    0.92
  -3   9   2    7.62    1.44
  -3   9   2   10.54    1.94
   3   9  -2   12.37    1.96
  -3   9   2    7.48    1.43
  -3   9   2    9.05    1.82
   3   9  -2   11.55    1.91
  -3  -9   2   10.46    1.53
  -3  -9   2   11.03    1.83
   3   9  -1 1890.56   36.17
  -3   9   1 1847.37   37.46
  -3   9   1 1903.29   35.72
  -3  -9   1 1892.58   36.21
  -3  -9   1 1890.65   35.10
   3   9  -1 1864.21   36.06
  -3   9   1 1887.92   37.57
  -3   9   1 1876.78   35.69
  -3  -9   0    1.27    0.91
  -3   9   0    1.43    1.15
  -3   9   0    2.23    1.42
  -3  -9   0    0.35    0.99
   3   9   0    1.24    1.00
  -3   9   0    1.36    1.15
  -3   9   0    1.25    1.10
   3   9   0    1.07    1.08
  -3   9  -1  963.13   22.16
  -3   9  -1  977.91   22.29
   3   9   1  959.77   20.34
  -3   9  -1  975.90   20.84
  -3  -9  -1  986.67   20.94
  -3  -9  -1  951.29   20.02
   3   9   1  964.63   20.35
  -3   9  -1  986.67   20.94
  -3  -9  -2   83.74    4.33
  -3   9  -2   84.23    4.91
  -3   9  -2   78.06    4.73
   3   9   2   79.54    3.85
  -3   9  -2   81.00    4.30
  -3   9  -2   80.29    3.73
   3  -9   2   78.33    3.77
  -3   9  -2   82.91    4.36
   3   9   2   75.80    3.75
  -3  -9  -2   82.55    3.99
   3  -9   3 1439.55   28.12
  -3   9  -3 1453.70   30.13
  -3   9  -3 1418.06   30.01
  -3  -9  -3 1455.04   28.70
  -3   9  -3 1425.29   30.49
  -3   9  -3 1408.51   28.65
  -3  -9  -3 1482.06   28.02
  -3   9  -3 1425.41   27.67
  -3   9  -3 1447.11   28.83
  -3   9  -4  157.24    7.01
  -3  -9  -4  173.17    6.42
   3  -9   4  170.44    6.29
  -3   9  -4  163.06    5.89
  -3  -9  -4  165.79    5.97
  -3   9  -5  673.92   15.31
  -3   9  -5  660.48   16.90
   3  -9   5  670.12   15.89
  -3  -9  -5  674.02   15.69
  -3  -9  -5  678.42   15.23
  -3  -9  -6  922.13   19.25
  -3   9  -6  863.47   20.76
  -3   9  -6  907.23   20.84
  -3   9  -6  941.21   19.97
   3  -9   6  893.16   20.10
  -3  -9  -6  902.43   19.60
  -3   9  -6  917.91   19.47
  -3   9  -6  923.50   19.88
  -3   9  -7  230.56    8.41
  -3  -9  -7  229.89    7.48
  -3   9  -7  237.45    8.26
  -3   9  -7  243.79    7.68
   3  -9   7  242.46    8.20
  -3  -9  -7  235.49    7.36
  -3   9  -7  244.27    8.67
  -3   9  -7  227.31    7.50
  -3   9  -7  236.76    7.64
  -3  -9  -8   19.32    2.00
  -3   9  -8   22.63    2.54
  -3   9  -8   21.30    2.38
  -3  -9  -8   20.08    1.99
  -3   9  -8   18.66    2.19
  -3   9  -8   21.24    2.10
  -3   9  -8   20.38    2.05
   3  -9   8   21.02    2.35
  -3   9  -8   19.97    2.14
  -3   9  -9   36.35    2.50
  -3  -9  -9   39.47    2.68
  -3   9  -9   38.03    3.10
  -3  -9  -9   32.88    2.03
  -3   9  -9   37.20    2.82
  -3   9  -9   34.26    2.45
   3  -9   9   37.96    3.02
  -3  -9  -9   37.59    2.51
  -3   9  -9   37.67    2.76
  -3   9 -10   48.16    2.64
   3  -9  10   50.90    3.35
  -3  -9 -10   44.21    2.32
  -3   9 -10   48.68    2.64
  -3  -9 -10   48.33    2.68
  -3  -9 -10   47.91    2.89
  -3   9 -10   50.23    3.38
  -3   9 -10   48.79    3.04
  -3   9 -11  115.83    3.84
  -3   9 -11  135.94    5.35
  -3  -9 -11  135.41    4.83
   3  -9  11  134.81    5.31
  -3  -9 -11  123.19    3.96
  -3   9 -11  136.40    5.01
  -3   9 -11  119.07    3.86
  -3   9 -12   21.90    1.95
  -3   9 -12   22.61    1.90
   3  -9  12   21.23    1.96
   3  -9  13  963.33   19.12
   3   9  13  949.90   20.61
  -3   9 -13  986.59   18.93
  -3   9 -13  999.46   18.92
  -3 -10  13  206.60    5.43
   3  10 -12    0.67    0.60
   3 -10 -12    0.36    0.55
   3  10 -12    0.40    0.56
  -3 -10  12    0.41    0.61
  -3 -10  11   14.99    1.61
   3  10 -11   13.37    1.52
   3  10 -11   12.44    1.46
   3 -10 -10   76.85    3.62
   3  10 -10   74.24    3.71
  -3 -10  10   81.23    3.85
   3  10 -10   72.87    3.67
   3 -10  -9   30.02    2.36
   3  10  -9   29.02    2.49
  -3 -10   9   25.33    2.29
   3  10  -9   29.89    2.49
   3 -10  -8    0.43    0.81
   3 -10  -7  169.90    6.05
   3 -10  -7  161.35    6.43
   3  10  -7  173.19    6.58
   3  10  -7  174.07    6.57
  -3 -10   6  202.74    6.18
   3 -10  -6  209.57    6.92
   3 -10  -6  202.02    7.57
   3  10  -6  217.38    7.57
   3  10  -6  208.52    7.44
  -3  10   5    0.57    0.74
   3 -10  -5   -0.23    1.05
   3 -10  -5    0.11    1.01
   3  10  -5    1.69    1.28
  -3 -10   5    0.09    1.03
  -3  10   5    0.50    0.74
  -3 -10   5    1.51    0.86
   3  10  -5    1.12    1.31
  -3 -10   4 2415.30   44.98
   3 -10  -4 2365.94   46.04
   3  10  -4 2398.75   45.14
  -3  10   4 2439.25   43.63
  -3 -10   4 2407.60   43.21
   3  10  -4 2410.98   45.15
  -3  10   4 2432.80   43.66
  -3  10   3  172.00    6.11
   3 -10  -3  165.25    7.22
   3  10  -3  174.85    6.73
  -3  10   3  167.68    6.02
  -3 -10   3  165.93    5.67
   3  10  -3  168.15    6.63
  -3 -10   3  173.43    6.62
  -3  10   2  606.61   14.51
  -3 -10   2  633.36   15.18
   3  10  -2  624.26   15.10
  -3  10   2  628.01   14.55
  -3 -10   2  618.39   13.84
   3  10  -2  615.02   15.05
  -3  10   1  210.46    7.09
  -3  10   1  209.85    8.16
   3  10  -1  189.31    6.92
  -3  10   1  204.60    6.97
  -3  10   1  201.81    8.10
  -3 -10   1  197.41    7.18
  -3 -10   1  198.11    6.36
   3  10  -1  192.88    6.96
  -3  10   0  756.09   18.53
  -3 -10   0  748.70   17.12
   3  10   0  732.21   16.65
  -3  10   0  740.98   18.48
  -3  10   0  748.74   16.90
   3  10   0  712.90   16.51
  -3 -10   0  737.96   15.95
  -3  10   0  756.83   16.98
  -3  10  -1   66.17    4.43
  -3  10  -1   65.49    3.86
  -3  10  -1   59.94    4.25
   3  10   1   62.03    3.48
  -3  10  -1   64.34    3.81
  -3 -10  -1   63.11    3.77
  -3 -10  -1   64.70    3.36
   3  10   1   65.15    3.53
  -3  10  -2   62.62    4.33
   3  10   2   62.99    3.33
  -3  10  -2   70.25    3.97
  -3 -10  -2   68.73    3.89
  -3  10  -2   71.23    4.58
   3  10   2   64.15    3.35
  -3 -10  -2   70.44    3.52
  -3  10  -2   67.98    3.92
  -3 -10  -3  169.05    6.31
  -3  10  -3  172.73    7.25
  -3  10  -3  159.03    7.05
  -3  10  -3  157.04    6.25
   3 -10   3  160.04    5.63
  -3 -10  -3  172.62    5.82
  -3  10  -3  170.96    6.48
  -3  10  -4  334.34   10.77
  -3  10  -4  336.99   10.91
  -3  10  -4  365.59   10.09
   3 -10   4  341.01    9.30
  -3 -10  -4  337.87    9.67
  -3 -10  -4  348.24    9.17
  -3  10  -4  347.71    9.96
  -3  10  -5    3.44    1.01
  -3 -10  -5    4.48    1.11
   3 -10   5    3.72    1.11
  -3 -10  -5    3.33    1.16
   3 -10   6  245.07    7.77
  -3 -10  -6  266.94    7.53
  -3  10  -6  267.42    8.09
  -3 -10  -6  254.98    7.78
  -3  10  -6  250.32    7.40
  -3  10  -6  261.72    8.05
  -3  10  -7   22.33    2.15
  -3 -10  -7   22.23    1.94
  -3  10  -7   19.60    2.01
   3 -10   7   21.22    2.06
  -3 -10  -7   23.20    2.03
  -3  10  -7   20.07    1.90
   3 -10   8   84.35    4.06
  -3  10  -8   88.71    3.94
  -3 -10  -8   90.02    3.81
  -3  10  -8   81.68    4.43
  -3  10  -8   84.65    3.83
  -3 -10  -8   85.24    3.71
  -3  10  -8   82.71    3.76
  -3 -10  -9  160.22    5.21
  -3  10  -9  158.35    6.05
   3 -10   9  156.96    5.58
  -3 -10  -9  158.55    4.96
  -3  10  -9  151.35    5.05
  -3  10  -9  152.04    5.08
  -3  10  -9  153.24    5.21
  -3  10 -10   18.42    1.93
  -3 -10 -10   19.58    1.66
  -3  10 -10   17.22    1.42
   3 -10  10   19.28    1.81
  -3  10 -10   16.43    1.41
  -3  10 -10   17.98    1.63
   3 -10  11   46.02    2.53
  -3  10 -11   46.24    2.69
  -3  10 -11   45.46    2.37
  -3  10 -12   20.20    1.55
   3 -10  12   17.82    1.43
   3 -11 -11   22.16    1.58
   3  11 -11   19.39    1.45
  -3 -11  11   23.70    1.66
   3  11 -10   79.05    3.33
  -3 -11  10   78.03    3.36
   3  11 -10   76.26    3.30
   3 -11 -10   75.16    3.18
   3 -11  -9  535.76   11.97
   3  11  -9  564.12   12.47
  -3 -11   9  545.19   12.37
   3  11  -9  541.19   12.33
   3 -11  -8    1.21    0.77
   3 -11  -7   32.45    2.30
   3  11  -7   32.67    2.60
   3  11  -7   34.61    2.62
   3 -11  -6   53.17    3.01
   3  11  -6   51.05    3.27
  -3 -11   6   54.46    3.36
   3  11  -6   55.74    3.35
   3 -11  -5   72.17    3.56
   3  11  -5   71.14    3.95
  -3 -11   5   78.32    4.06
   3  11  -5   74.07    3.97
  -3 -11   4  185.19    6.64
  -3  11   4  180.77    5.82
   3 -11  -4  177.82    6.03
   3  11  -4  185.32    6.64
  -3  11   4  184.61    5.83
   3  11  -4  178.54    6.50
  -3  11   3   61.37    3.28
   3 -11  -3   60.18    3.25
  -3 -11   3   62.60    3.69
   3  11  -3   61.66    3.63
  -3  11   3   61.05    3.25
   3  11  -3   61.80    3.63
  -3  11   2   96.68    4.34
   3  11  -2   99.59    4.62
  -3  11   2  102.09    4.43
  -3 -11   2  102.31    4.77
   3  11  -2  103.66    4.65
  -3  11   1  193.08    6.57
   3  11  -1  185.80    6.43
   3 -11  -1  188.07    7.61
   3  11  -1  194.01    6.58
  -3  11   1  187.56    6.45
  -3 -11   1  197.67    6.84
  -3  11   0  164.76    6.05
   3  11   0  167.12    5.86
  -3  11   0  163.64    6.01
  -3 -11   0  168.70    6.21
   3  11   0  168.39    5.84
  -3 -11   0  163.64    5.18
  -3  11  -1   29.57    2.50
  -3 -11  -1   32.80    2.62
   3  11   1   31.47    2.28
  -3  11  -1   30.70    2.55
   3  11   1   26.97    2.12
  -3  11  -1   30.18    2.98
  -3 -11  -1   31.36    2.10
  -3 -11  -2    5.87    1.33
  -3  11  -2    6.95    1.70
  -3  11  -2    5.90    1.37
  -3  11  -2    5.71    1.35
  -3 -11  -2    5.38    1.02
  -3  11  -3   46.12    3.10
  -3 -11  -3   46.14    2.54
  -3  11  -3   45.82    3.55
  -3  11  -3   47.17    3.12
  -3 -11  -3   46.12    2.97
  -3 -11  -4  583.20   12.82
  -3  11  -4  622.80   15.40
  -3  11  -4  617.61   14.23
  -3  11  -4  616.90   14.19
  -3 -11  -4  601.07   13.80
  -3 -11  -5   35.17    2.16
  -3 -11  -5   33.58    2.38
   3 -11   5   30.58    2.10
  -3  11  -5   35.78    2.98
  -3  11  -6    1.20    0.90
  -3  11  -6    1.24    1.06
  -3 -11  -6    0.52    0.66
  -3 -11  -6    1.45    0.71
  -3  11  -6    1.72    0.94
   3 -11   6    1.13    0.70
  -3  11  -7   30.30    2.18
  -3 -11  -7   30.47    1.91
   3 -11   7   29.24    2.01
  -3  11  -7   33.71    2.29
  -3 -11  -7   30.29    2.00
  -3 -11  -8   89.99    3.28
  -3  11  -8   90.75    3.57
   3 -11   8   86.90    3.43
  -3  11  -8   91.44    3.58
  -3 -11  -8   82.67    3.14
   3 -11   9    0.25    0.48
  -3  11  -9   -0.13    0.70
  -3  11  -9    0.08    0.49
  -3  11  -9    0.40    0.51
  -3  11 -10   18.46    1.62
   3  12  -9   15.79    1.33
   3 -12  -8  137.28    4.10
   3  12  -7   23.30    1.88
   3 -12  -7   23.62    1.63
   3  12  -7   23.01    1.87
  -3 -12   7   23.15    1.85
   3  12  -6    0.88    0.81
   3 -12  -6    1.12    0.63
   3  12  -6    0.41    0.70
  -3 -12   6    0.93    0.74
   3  12  -5    1.84    0.89
   3 -12  -5    2.98    0.78
   3  12  -5    2.08    0.94
  -3 -12   5    2.05    0.87
   3  12  -4    4.08    1.04
   3 -12  -4    3.44    0.80
   3  12  -4    2.51    0.88
  -3 -12   4    3.79    1.06
   3  12  -3    5.69    1.17
  -3  12   3    3.92    0.88
   3 -12  -3    3.37    0.83
  -3 -12   3    5.71    1.20
   3  12  -3    4.05    1.08
  -3  12   3    3.05    0.81
  -3  12   2    7.58    1.18
  -3  12   2    7.08    1.16
   3 -12  -2    7.78    1.08
   3  12  -2    6.17    1.20
   3  12  -2    8.32    1.30
  -3 -12   2    8.93    1.38
  -3  12   1  114.87    4.41
   3 -12  -1  111.43    3.93
   3  12  -1  115.65    4.34
  -3  12   1  111.18    4.33
  -3 -12   1  117.77    4.66
   3  12  -1  116.08    4.36
  -3  12   0  180.30    5.80
   3 -12   0  162.72    4.90
   3  12   0  167.65    5.23
  -3  12   0  181.33    5.79
  -3 -12   0  180.75    5.92
   3  12   0  164.41    5.24
  -3  12  -1  140.58    5.03
  -3  12  -1  139.39    4.98
  -3 -12  -1  138.85    4.98
  -3  12  -2   13.66    1.59
  -3  12  -2   12.81    1.55
  -3 -12  -2   14.43    1.55
  -3  12  -3   20.62    1.87
  -3  12  -3   20.75    1.86
  -3 -12  -3   20.03    1.75
  -3  12  -4   58.76    3.05
  -3  12  -4   58.45    3.45
  -3  12  -4   54.40    2.92
  -3 -12  -4   58.64    2.82
  -3  12  -5   45.51    2.95
  -3 -12  -5   43.18    2.26
  -3  12  -6    1.38    0.70
  -3 -12  -6    1.33    0.54
  -3  12  -6    0.47    0.77
  -3  12  -6    1.99    0.78
  -3  12  -7  350.42    8.13
  -3  12  -7  354.81    8.11
   3  13  -4    0.36    0.55
   3  13  -4    0.51    0.53
  -3 -13   4    0.95    0.55
   3  13  -3   32.58    1.86
   3  13  -3   31.91    1.83
  -3 -13   3   32.11    1.98
   3  13  -2  224.43    5.73
   3  13  -2  223.98    5.74
  -3 -13   1   83.35    3.22
  -3  13   1   75.81    2.87
  -3  13   1   73.62    2.83
  -3  13   0    7.94    1.03
  -3 -13   0    8.30    1.04
  -3  13   0    7.02    0.95
  -3  13  -1    0.47    0.58
  -3  13  -1    1.10    0.61
  -3 -13  -1    1.82    0.65
  -3  13  -2    1.46    0.67
  -3 -13  -2    1.17    0.52
  -3  13  -2    1.86    0.68
  -3  13  -3  106.92    3.67
  -3  13  -3  106.22    3.64
   4   0 -19    0.32    0.56
   4   0 -18   11.33    1.38
   4   0 -17    1.75    1.15
   4   0 -17    0.62    0.86
   4   0 -16 1250.17   25.45
   4   0 -16 1225.41   24.49
   4   0 -15    1.87    1.39
   4   0 -15    1.08    1.19
   4   0 -15    0.77    0.96
   4   0 -14  613.47   15.42
   4   0 -14  659.43   15.80
   4   0 -14  624.74   14.94
   4   0 -13    0.09    1.10
   4   0 -13    0.16    1.17
   4   0 -13    0.72    0.99
   4   0 -12  596.76   14.36
   4   0 -12  575.43   13.94
  -4   0  12  599.36   15.05
   4   0 -12  597.91   14.26
   4   0 -11    1.07    0.91
  -4   0  11   -0.18    0.91
   4   0 -11    1.79    0.94
   4   0 -11    2.35    1.11
  -4   0  10  385.95   10.60
   4   0 -10  400.21   10.04
   4   0 -10  390.64   10.06
   4   0  -9    4.64    1.03
  -4   0   9    0.78    0.53
  -4   0   9    2.56    1.00
  -4   0   9    1.54    0.63
   4   0  -9    4.23    0.98
  -4   0   8  235.09    6.22
  -4   0   8  243.80    6.32
   4   0  -8  233.12    6.47
  -4   0   8  226.99    6.94
   4   0  -8  224.46    6.47
  -4   0   7    0.55    0.55
   4   0  -7    0.68    0.76
  -4   0   7    1.55    1.00
  -4   0   7    0.43    0.81
  -4   0   7    0.39    0.52
  -4   0   7    0.97    0.72
  -4   0   6 9637.26  160.30
  -4   0   6 9999.00  158.92
   4   0  -6 9539.25  159.34
  -4   0   6 9527.28  160.26
  -4   0   6 9427.04  158.75
  -4   0   6 9614.94  159.37
   4   0  -5    1.55    0.60
  -4   0   5    2.54    0.90
  -4   0   5    0.59    0.57
   4   0  -5    1.88    0.68
  -4   0   5    0.74    0.63
  -4   0   4  744.06   14.76
  -4   0   4  767.40   14.76
   4   0  -4  770.46   14.84
   4   0  -4  769.19   14.35
  -4   0   4  781.11   15.48
  -4   0   3    0.52    0.61
  -4   0   3    0.72    0.54
  -4   0   3    0.93    0.57
   4   0  -3    0.65    0.51
  -4   0   2 2849.66   48.65
   4   0  -2 2882.63   48.24
   4   0  -2 2857.59   47.75
  -4   0   2 2875.02   48.93
  -4   0   2 2827.50   48.65
   4   0  -1    0.38    0.31
   4   0  -1    0.42    0.39
  -4   0   1    0.23    0.55
   4   0   0 2227.91   37.08
   4   0   0 2243.60   37.14
   4   0   0 2174.33   36.72
   4   0   1    0.16    0.20
   4   0   1    0.27    0.24
   4   0   1    0.36    0.23
   4   0   2   85.72    1.79
   4   0   2   88.13    1.80
  -4   0  -3    0.28    0.50
  -4   0  -3    0.57    0.52
  -4   0  -3    1.03    0.61
  -4   0  -4 2251.34   34.12
  -4   0  -4 2183.00   33.76
  -4   0  -4 2273.32   33.92
  -4   0  -5    0.10    0.42
  -4   0  -5    0.05    0.64
  -4   0  -5    1.18    0.62
  -4   0  -6 2882.86   49.47
  -4   0  -6 2813.81   50.01
  -4   0  -7    1.20    0.54
  -4   0  -7    0.60    0.78
  -4   0  -7    0.30    0.57
  -4   0  -8 1113.58   20.74
  -4   0  -8 1064.44   21.08
  -4   0  -9    4.52    0.92
  -4   0  -9    0.52    0.66
  -4   0 -10  116.22    4.42
  -4   0 -10  113.96    4.43
  -4   0 -11    0.61    1.17
  -4   0 -11   -0.06    0.69
  -4   0 -12 2295.85   41.41
   4   0  12 2121.10   42.89
  -4   0 -12 2279.80   41.49
  -4   0 -12 2087.21   39.22
   4   0  13    0.56    1.06
  -4   0 -13   -0.09    1.04
  -4   0 -13    0.29    0.63
  -4   0 -14  101.50    4.89
   4   0  14   85.45    4.65
  -4   0 -14   95.46    4.66
  -4   0 -15    0.55    0.85
  -4   0 -15   -0.25    1.10
  -4   0 -16  131.43    5.15
  -4   0 -16  127.28    4.89
  -4   0 -17   -0.64    0.78
  -4   0 -17    0.78    0.61
  -4   1  19   48.57    2.78
  -4  -1  19   53.82    2.93
   4   1 -19   51.65    2.49
   4  -1 -18  273.12    7.09
  -4   1  18  273.22    8.25
  -4  -1  18  279.20    8.35
   4   1 -18  282.48    7.65
   4  -1 -17  130.53    5.53
  -4   1  17  133.56    5.73
  -4  -1  17  134.44    5.77
   4  -1 -17  125.07    4.76
   4   1 -17  124.64    5.02
   4   1 -16    5.47    1.33
   4  -1 -16    5.58    1.47
   4   1 -16    5.77    1.64
   4  -1 -16    4.46    1.20
  -4   1  16    5.72    1.55
  -4  -1  16   10.00    1.87
   4   1 -16    5.06    1.38
   4  -1 -16    5.00    1.29
   4   1 -15 3884.77   69.72
   4  -1 -15 3980.39   69.74
  -4   1  15 3911.79   70.27
  -4  -1  15 4080.43   70.53
   4  -1 -15 3750.22   69.37
   4   1 -15 3937.63   69.00
   4   1 -15 3785.20   69.55
   4  -1 -15 3918.07   68.48
   4   1 -14 1572.28   31.23
  -4   1  14 1570.00   31.82
  -4  -1  14 1510.93   31.60
   4  -1 -14 1506.69   30.79
   4   1 -14 1523.03   31.03
   4   1 -14 1544.72   30.50
   4  -1 -14 1583.62   31.07
   4  -1 -14 1556.95   30.14
   4  -1 -13    5.53    1.57
   4   1 -13   12.14    1.93
  -4   1  13    6.44    1.67
   4  -1 -13    8.08    1.57
   4  -1 -13    8.04    1.58
   4   1 -13   12.89    1.88
   4   1 -12 1451.50   28.53
   4  -1 -12 1362.59   26.27
  -4   1  12 1447.10   29.26
   4  -1 -12 1471.97   28.32
   4   1 -12 1418.33   28.31
   4  -1 -12 1459.61   28.45
   4  -1 -12 1402.35   27.77
   4  -1 -11 1107.69   22.60
   4   1 -11 1097.66   22.62
   4  -1 -11 1055.01   20.71
  -4   1  11 1139.20   23.46
   4  -1 -11 1116.86   22.53
   4   1 -11 1116.02   22.56
   4  -1 -11 1096.97   22.24
   4  -1 -10  657.92   14.44
   4   1 -10  661.46   14.41
   4  -1 -10  615.70   12.87
  -4   1  10  635.21   14.92
   4  -1 -10  659.93   14.35
   4   1 -10  654.89   14.31
  -4  -1  10  620.76   13.69
   4  -1 -10  630.31   14.14
   4   1 -10  643.54   14.35
   4   1  -9  413.04   10.18
  -4   1   9  415.58    9.32
   4  -1  -9  398.73    9.03
  -4   1   9  405.36    9.28
  -4  -1   9  397.84    9.81
  -4  -1   9  441.62   10.03
   4  -1  -9  425.81   10.23
  -4   1   9  418.27   10.76
   4   1  -9  425.84   10.16
   4   1  -9  442.01   10.43
  -4  -1   8  527.19   11.67
  -4   1   8  508.69   12.99
   4   1  -8  540.91   11.83
   4  -1  -8  512.26   10.74
  -4   1   8  500.61   11.04
  -4  -1   8  506.66   11.58
   4  -1  -8  547.05   11.87
  -4   1   8  528.48   12.28
  -4  -1   8  552.75   12.53
   4   1  -8  552.82   11.76
  -4   1   8  566.97   11.31
  -4  -1   8  520.43   12.84
   4   1  -7   83.15    3.32
   4  -1  -7   78.82    2.79
  -4   1   7   85.02    3.19
  -4  -1   7   83.32    3.34
  -4   1   7   86.35    4.01
   4  -1  -7   85.93    3.41
  -4   1   7   82.31    3.54
  -4  -1   7   87.97    3.76
   4   1  -7   82.89    3.25
  -4  -1   7   83.74    3.34
  -4   1   7   81.81    3.14
  -4  -1   7   83.51    3.90
   4   1  -6 2122.76   37.07
  -4   1   6 2089.69   37.04
  -4  -1   6 2100.18   37.42
   4  -1  -6 2137.18   37.32
   4   1  -6 2138.31   37.65
  -4   1   6 2201.40   37.66
   4   1  -6 2147.96   37.02
  -4  -1   6 2149.34   37.92
  -4   1   6 2063.45   38.22
  -4   1   6 2203.42   37.13
  -4  -1   6 2002.72   37.26
  -4  -1   6 2135.75   38.35
  -4   1   6 2084.79   38.86
  -4   1   5 1887.76   33.23
  -4  -1   5 1898.45   33.50
   4  -1  -5 1852.16   33.74
   4  -1  -5 1891.96   33.30
   4   1  -5 1885.36   32.89
  -4  -1   5 1881.20   33.79
   4   1  -5 1887.67   33.54
  -4   1   5 1872.85   33.22
  -4  -1   5 1963.99   33.54
  -4   1   5 1885.74   34.05
  -4   1   5 1886.30   34.75
  -4  -1   5 1938.11   34.19
  -4   1   4 1134.45   21.62
  -4   1   4 1197.13   21.21
   4  -1  -4 1147.85   21.47
   4  -1  -4 1141.60   21.02
  -4  -1   4 1202.74   21.37
   4   1  -4 1142.56   21.10
  -4  -1   4 1120.27   21.83
   4   1  -4 1139.62   20.51
  -4  -1   4 1160.13   21.65
  -4  -1   4 1152.81   21.41
  -4   1   4 1181.37   21.21
  -4  -1   4 1139.91   21.25
  -4   1   4 1152.31   22.28
  -4  -1   3  135.19    4.30
  -4   1   3  133.67    4.55
  -4   1   3  140.11    4.09
   4  -1  -3  137.73    4.15
  -4  -1   3  133.32    4.09
  -4  -1   3  139.75    4.16
   4  -1  -3  137.11    3.91
   4   1  -3  138.28    3.88
   4   1  -3  150.50    3.56
  -4   1   3  130.53    4.06
  -4  -1   3  141.09    4.20
  -4   1   3  140.12    4.30
   4  -1  -2 3416.67   57.83
  -4   1   2 3422.50   57.91
  -4  -1   2 3349.05   57.97
   4   1  -2 3442.37   57.28
  -4   1   2 3416.68   57.94
  -4  -1   2 3535.74   57.80
  -4  -1   2 3448.22   58.00
   4  -1  -2 3418.01   57.49
  -4   1   2 3372.22   58.14
  -4   1   1  139.16    3.81
  -4  -1   1  104.92    3.11
   4  -1  -1  101.79    3.11
   4   1  -1  106.10    2.83
   4   1  -1  106.61    2.44
   4  -1  -1  106.13    3.23
   4  -1  -1  104.74    3.29
   4  -1   0  366.34    7.61
  -4   1   0  344.42    7.87
   4  -1   0  353.45    7.42
  -4   1   0  353.60    7.88
   4   1   0  369.20    6.76
   4  -1   0  373.95    7.50
  -4   1  -1  910.30   16.78
  -4   1  -1  883.08   16.95
  -4   1  -1  883.84   16.09
   4  -1   1  894.56   16.00
  -4   1  -1  896.82   16.75
   4  -1   1  920.75   16.29
  -4   1  -2  265.52    6.24
   4  -1   2  274.18    5.74
   4  -1   2  271.19    5.51
  -4   1  -2  255.06    6.42
  -4   1  -2  262.25    5.66
  -4   1  -2  272.37    6.54
  -4   1  -2  261.95    6.21
  -4  -1  -2  256.79    6.19
  -4  -1  -3  439.37    9.36
  -4   1  -3  450.60    9.80
  -4   1  -3  430.01    8.63
   4  -1   3  462.48    8.34
  -4  -1  -3  450.85    9.55
  -4   1  -3  436.98    9.31
  -4  -1  -3  426.72    9.17
   4  -1   3  468.10    8.64
  -4   1  -3  453.59    9.72
  -4   1  -3  445.82    9.36
  -4   1  -4 2163.81   38.29
  -4   1  -4 2138.07   37.56
  -4   1  -4 2222.46   38.31
  -4  -1  -4 2222.43   38.71
  -4   1  -4 2208.52   39.08
   4  -1   4 2243.46   36.96
  -4  -1  -4 2240.55   38.88
   4  -1   4 2323.78   37.35
  -4  -1  -4 2170.29   38.31
  -4   1  -4 2243.06   38.99
  -4   1  -5  801.67   15.20
  -4   1  -5  780.81   14.64
  -4  -1  -5  798.73   15.88
  -4   1  -5  807.43   16.22
  -4   1  -5  808.53   15.21
  -4  -1  -5  799.24   15.42
  -4  -1  -5  808.33   15.98
  -4   1  -5  809.88   16.00
  -4  -1  -5  807.70   15.35
  -4   1  -6  596.75   11.42
  -4   1  -6  563.49   11.47
  -4   1  -6  562.28   11.21
  -4  -1  -6  600.01   12.65
  -4   1  -6  569.45   11.52
  -4   1  -6  588.45   12.57
  -4  -1  -6  581.28   11.82
  -4  -1  -6  600.72   12.04
  -4  -1  -7   31.24    1.94
  -4   1  -7   29.42    1.68
  -4  -1  -7   28.66    2.13
  -4   1  -7   27.42    2.03
  -4   1  -7   32.42    1.65
  -4  -1  -7   25.79    1.71
  -4  -1  -8  583.48   12.40
  -4   1  -8  540.78   11.40
  -4   1  -8  567.12   11.87
  -4  -1  -8  599.20   13.25
  -4   1  -8  611.63   13.09
  -4  -1  -8  560.58   11.97
  -4  -1  -9 1863.54   33.59
  -4  -1  -9 1838.30   34.60
  -4   1  -9 1879.72   34.85
  -4   1  -9 1907.75   34.85
  -4   1  -9 1898.06   34.27
  -4  -1 -10 1260.41   23.72
  -4   1 -10 1236.52   24.80
   4  -1  10 1154.59   25.55
  -4   1 -10 1224.47   23.99
  -4  -1 -10 1121.35   22.59
  -4   1 -10 1311.62   24.97
  -4  -1 -11  249.38    7.40
  -4   1 -11  248.40    8.20
   4  -1  11  234.49    8.39
  -4   1 -11  244.42    8.10
  -4   1 -11  242.22    7.45
  -4   1 -12 2969.07   53.39
  -4   1 -12 3009.74   53.39
  -4  -1 -13 5849.90   98.51
  -4   1 -13 5725.38   98.78
  -4   1 -13 5724.62   98.71
  -4   1 -13 5792.01   97.17
  -4  -1 -14  111.69    5.07
  -4   1 -14   97.68    4.82
   4   1  14   94.17    5.34
  -4   1 -14   96.91    4.76
  -4  -1 -14   95.55    4.61
  -4   1 -14   91.26    3.96
  -4  -1 -15   28.21    2.51
  -4   1 -15   27.99    2.50
   4   1  15   26.97    2.60
  -4   1 -15   34.10    2.63
  -4  -1 -15   30.24    2.47
  -4   1 -15   26.55    1.87
  -4   1 -16  146.12    5.32
  -4  -1 -16  150.74    5.51
  -4   1 -16  148.04    5.51
   4   1  16  135.15    5.14
  -4  -1 -16  147.47    5.23
  -4  -1 -17  202.83    5.81
  -4  -1 -17  207.61    6.24
  -4   1 -17  205.22    6.15
  -4   1 -17  201.27    5.88
  -4   2  19   94.18    3.76
  -4  -2  19   94.48    3.83
   4   2 -19   88.93    3.43
  -4   2  18    2.44    0.98
  -4  -2  18    1.45    0.96
   4   2 -18    0.49    0.85
  -4   2  17  102.51    4.83
  -4  -2  17  109.97    5.05
   4  -2 -17   99.19    3.86
   4   2 -17   97.26    4.42
   4   2 -16    2.21    1.08
  -4   2  16    1.57    1.21
  -4  -2  16    4.61    1.47
   4  -2 -15 1538.04   29.71
   4   2 -15 1531.07   30.10
   4  -2 -15 1410.20   27.31
  -4   2  15 1479.83   30.10
  -4  -2  15 1492.51   30.26
   4  -2 -15 1441.88   29.32
   4   2 -15 1426.00   29.68
   4  -2 -15 1415.43   28.04
  -4   2  14    6.84    1.67
   4  -2 -14    7.04    1.64
   4   2 -14    7.96    1.69
   4   2 -14    8.04    1.78
  -4  -2  14    7.78    1.73
   4  -2 -14    9.64    1.58
   4  -2 -14    8.20    1.28
   4  -2 -14    8.58    1.63
   4  -2 -13 6288.31  104.27
   4   2 -13 6260.26  104.52
   4  -2 -13 5835.37  101.98
  -4   2  13 6172.00  105.12
   4  -2 -13 5993.84  103.90
  -4  -2  13 5986.40  105.04
   4   2 -13 6016.51  104.30
   4   2 -13 6034.49  103.88
   4  -2 -13 6011.35  103.00
   4  -2 -12  565.56   13.81
   4   2 -12  547.23   13.78
   4  -2 -12  540.13   12.28
   4   2 -12  549.04   13.67
   4   2 -12  505.32   12.36
  -4   2  12  578.34   14.42
   4  -2 -12  549.03   13.52
  -4  -2  12  586.86   14.48
   4   2 -12  519.01   12.48
   4  -2 -12  566.19   13.20
   4   2 -12  587.39   13.74
   4  -2 -11   93.49    4.42
   4   2 -11   97.31    4.58
   4  -2 -11   92.84    3.73
  -4  -2  11   98.11    4.28
  -4   2  11   87.11    4.61
   4  -2 -11   90.01    4.31
  -4  -2  11   90.26    4.72
   4   2 -11   90.26    4.37
   4  -2 -11   88.88    4.15
   4   2 -11   91.53    4.39
  -4  -2  11   86.91    4.08
   4   2 -10   11.98    1.60
   4  -2 -10    6.95    1.05
  -4  -2  10   11.03    1.48
   4   2 -10   12.92    1.61
  -4   2  10    8.15    1.45
  -4  -2  10   10.34    1.68
  -4  -2  10   12.30    1.58
   4  -2 -10   10.21    1.48
   4   2 -10    8.13    1.44
   4  -2 -10    8.93    1.48
   4   2  -9  317.10    8.61
   4  -2  -9  307.73    7.68
  -4  -2   9  314.48    8.58
   4  -2  -9  326.61    8.62
  -4   2   9  310.31    8.90
   4   2  -9  325.05    8.54
  -4  -2   9  322.88    8.61
   4   2  -9  320.03    8.62
  -4   2   8   29.99    2.56
   4   2  -8   45.04    2.54
   4  -2  -8   29.85    1.82
  -4   2   8   29.66    1.80
   4  -2  -8   29.37    2.16
   4   2  -8   29.83    2.22
  -4   2   8   31.25    2.29
   4   2  -8   48.91    2.59
  -4   2   8   29.04    1.79
  -4  -2   8   31.10    2.20
  -4   2   8   28.40    2.67
  -4  -2   8   34.74    2.61
  -4  -2   7 2167.95   40.74
  -4   2   7 2238.72   40.97
   4   2  -7 2222.80   39.76
  -4  -2   7 2353.75   40.40
   4  -2  -7 2259.12   40.08
  -4   2   7 2223.30   40.03
  -4   2   7 2322.29   39.32
   4   2  -7 2302.27   39.69
  -4   2   7 2225.76   39.19
  -4  -2   7 2140.26   40.00
   4   2  -7 2289.24   40.08
  -4  -2   6  197.95    6.10
   4   2  -6  200.02    5.52
  -4   2   6  210.14    5.53
  -4  -2   6  203.84    5.95
   4  -2  -6  208.28    5.92
  -4   2   6  208.26    5.71
   4   2  -6  204.84    5.54
  -4   2   6  198.36    5.43
  -4   2   6  212.52    6.29
  -4  -2   6  216.83    6.06
  -4   2   6  197.10    6.86
  -4   2   5 3053.34   52.47
  -4  -2   5 2881.69   53.09
   4   2  -5 2966.86   51.42
   4  -2  -5 2958.10   52.53
  -4   2   5 3136.82   51.76
  -4  -2   5 3007.84   52.26
   4  -2  -5 3030.65   52.11
  -4  -2   5 2924.75   52.28
   4   2  -5 3119.65   51.38
   4   2  -5 3017.05   51.98
  -4   2   5 2997.11   51.71
  -4   2   5 2997.04   53.67
  -4  -2   5 3119.59   52.32
  -4  -2   5 3057.70   52.41
  -4  -2   4 1171.02   21.42
  -4   2   4 1161.53   21.10
  -4   2   4 1132.16   21.10
  -4  -2   4 1117.36   21.43
   4  -2  -4 1136.68   21.33
  -4   2   4 1120.89   21.96
   4   2  -4 1163.39   20.47
   4  -2  -4 1129.20   21.70
  -4  -2   4 1152.25   21.53
   4   2  -4 1155.87   21.05
  -4  -2   4 1132.09   21.43
  -4   2   4 1138.38   22.61
  -4  -2   4 1131.29   21.99
  -4   2   4 1154.47   21.55
  -4   2   3  713.89   13.98
  -4  -2   3  688.96   14.41
   4  -2  -3  695.18   14.35
  -4   2   3  733.08   14.00
  -4  -2   3  699.32   14.22
  -4   2   3  706.88   14.45
   4   2  -3  731.13   13.06
  -4  -2   3  716.26   14.18
   4   2  -3  705.90   13.60
  -4  -2   3  682.90   14.11
   4  -2  -3  715.36   14.34
  -4   2   3  720.12   14.29
  -4  -2   3  718.21   13.89
  -4   2   2  913.93   17.27
   4   2  -2  915.83   15.94
   4  -2  -2  897.31   17.31
  -4   2   2  858.90   17.42
   4  -2  -2  958.10   17.49
  -4   2   2  913.01   17.27
  -4  -2   2  928.85   17.38
   4   2  -2  915.64   16.60
  -4  -2   2  924.65   16.87
  -4   2   2  921.14   17.50
   4  -2  -2  898.23   17.61
  -4  -2   1  781.69   14.91
  -4   2   1  760.91   14.84
   4  -2  -1  783.81   14.81
  -4  -2   1  780.07   14.93
  -4   2   1  758.22   15.01
  -4   2   1  739.73   14.87
  -4  -2   1  788.71   14.87
   4   2  -1  736.01   13.01
   4   2  -1  801.66   13.83
  -4  -2   1  774.67   14.04
   4  -2  -1  783.32   15.14
  -4   2   1  818.74   15.22
   4   2   0   97.95    2.32
  -4  -2   0   98.11    3.33
  -4   2   0   96.69    3.46
  -4   2   0   99.21    3.26
  -4  -2   0   96.85    3.29
  -4  -2   0  100.28    3.31
   4  -2   0  101.23    3.22
  -4  -2   0   96.83    2.48
   4  -2   0   99.14    3.43
  -4   2   0  103.24    3.55
  -4   2  -1 6632.41  111.94
  -4  -2  -1 6619.63  111.78
  -4   2  -1 6793.17  112.28
   4  -2   1 6860.36  111.46
  -4   2  -1 6735.36  111.93
  -4  -2  -1 6766.23  111.67
  -4  -2  -1 6677.07  111.76
   4  -2   1 6857.16  112.02
  -4  -2  -1 6793.23  111.76
  -4   2  -2  125.71    3.95
  -4  -2  -2  138.25    4.05
   4  -2   2  132.75    3.64
  -4   2  -2  127.41    4.03
  -4   2  -2  125.73    3.73
  -4   2  -2  129.80    4.24
  -4   2  -2  127.07    3.94
  -4  -2  -2  127.11    3.89
   4  -2   2  129.62    3.99
  -4   2  -3 7064.75  119.82
  -4  -2  -3 7180.51  119.38
  -4   2  -3 7262.32  120.38
  -4  -2  -3 7276.23  120.07
  -4   2  -3 7202.63  119.80
  -4   2  -3 7274.31  120.09
  -4  -2  -3 7110.95  119.74
   4  -2   3 7500.61  119.85
  -4   2  -4  399.47    8.84
  -4   2  -4  399.15    8.60
  -4  -2  -4  385.75    8.76
  -4   2  -4  405.47    8.84
   4  -2   4  411.50    8.18
  -4  -2  -4  402.94    9.20
   4  -2   4  416.73    8.91
  -4   2  -4  389.35    9.26
  -4  -2  -4  395.43    8.85
  -4   2  -4  382.39    9.22
  -4   2  -5  710.86   14.51
  -4   2  -5  732.23   14.34
  -4  -2  -5  764.31   14.89
   4  -2   5  741.82   13.69
  -4   2  -5  716.88   14.45
  -4   2  -5  740.60   15.27
  -4   2  -5  746.91   15.32
  -4  -2  -5  771.83   14.83
  -4   2  -6  108.50    3.66
  -4   2  -6  106.54    3.65
  -4  -2  -6  110.81    4.11
  -4   2  -6  111.20    4.39
  -4   2  -6  108.41    3.64
  -4   2  -6  115.76    4.34
  -4  -2  -6  114.22    3.97
  -4   2  -7  139.08    4.22
  -4   2  -7  138.22    4.43
  -4   2  -7  144.14    4.22
  -4  -2  -7  138.11    4.97
  -4   2  -7  135.70    5.14
  -4  -2  -7  148.09    5.11
  -4   2  -7  144.53    5.19
  -4   2  -7  146.16    5.18
  -4  -2  -7  156.06    4.89
  -4   2  -8  693.24   15.41
  -4  -2  -8  711.00   15.21
  -4   2  -8  698.21   15.45
  -4   2  -8  717.93   15.31
  -4  -2  -8  677.52   14.48
  -4  -2  -9 1690.46   30.73
  -4   2  -9 1692.57   31.90
  -4  -2  -9 1637.52   31.43
  -4   2  -9 1680.70   31.89
  -4   2  -9 1752.29   31.66
  -4  -2 -10  548.23   12.76
  -4  -2 -10  569.42   13.56
  -4   2 -10  545.05   13.69
  -4   2 -10  554.64   13.74
  -4   2 -10  550.79   13.29
  -4   2 -11 6698.61  113.96
  -4  -2 -11 6611.23  112.61
  -4  -2 -11 6747.63  113.60
  -4   2 -11 6689.90  113.91
  -4   2 -11 6538.21  113.04
  -4  -2 -12  258.05    7.88
  -4   2 -12  272.04    8.80
  -4   2 -12  254.23    8.53
  -4   2 -12  247.69    7.92
  -4   2 -13   30.61    2.84
  -4   2 -13   33.50    2.92
  -4   2 -13   28.33    2.42
  -4   2 -14    2.05    1.20
   4   2  14    0.27    1.31
  -4  -2 -14   -0.16    1.00
  -4   2 -14    0.80    1.01
  -4   2 -14    1.39    0.89
  -4  -2 -15   31.26    2.47
  -4   2 -15   33.58    2.67
   4   2  15   30.99    3.00
  -4   2 -15   33.83    2.65
  -4   2 -15   32.37    2.23
  -4   2 -16  430.78   10.48
   4   2  16  400.48   10.59
  -4  -2 -16  418.97   10.05
  -4   2 -16  415.76   10.29
  -4  -2 -17  390.31    9.12
  -4   2 -17  378.45    8.94
   4   2  17  326.19    8.46
   4  -2  17  348.55    9.63
  -4  -2 -17  361.57    8.47
  -4   2 -17  365.68    8.66
   4  -3 -19  184.46    5.34
  -4   3  19  169.45    5.11
  -4  -3  19  185.99    5.45
   4   3 -19  184.94    5.22
   4  -3 -18  201.40    6.29
  -4   3  18  195.94    6.26
  -4  -3  18  209.07    6.50
  -4   3  17  229.08    7.50
  -4  -3  17  238.07    7.66
   4  -3 -16  236.03    6.70
  -4   3  16  247.83    8.12
  -4  -3  16  242.31    8.09
   4  -3 -15  128.38    4.86
  -4   3  15  140.95    6.10
  -4  -3  15  142.47    6.20
   4   3 -15  144.17    5.89
   4  -3 -15  128.73    4.83
   4   3 -15  128.68    5.88
   4  -3 -14 1148.56   23.75
   4  -3 -14 1095.95   22.15
  -4   3  14 1118.26   24.18
  -4  -3  14 1138.21   24.38
   4   3 -14 1081.12   23.90
   4  -3 -14 1092.93   22.12
   4   3 -14 1126.96   23.57
   4  -3 -13  399.97   11.15
   4   3 -13  384.04   11.27
   4  -3 -13  378.08    9.96
   4   3 -13  382.30   11.22
  -4   3  13  418.28   11.75
   4  -3 -13  388.75   10.95
  -4  -3  13  410.22   11.72
   4  -3 -13  399.82   10.23
   4   3 -13  405.99   11.12
   4   3 -12 2931.42   53.37
   4  -3 -12 2875.01   51.44
   4  -3 -12 3011.75   53.04
  -4   3  12 2986.98   53.71
   4  -3 -12 3004.50   52.90
  -4  -3  12 2971.33   53.80
   4   3 -12 2901.05   53.13
   4   3 -12 2898.03   51.84
   4  -3 -12 2916.86   51.84
   4   3 -12 2957.45   52.94
   4   3 -11   51.49    3.34
   4  -3 -11   53.38    2.92
   4   3 -11   49.67    3.22
   4  -3 -11   50.66    3.05
   4   3 -11   49.45    3.18
   4  -3 -11   53.90    3.31
  -4   3  11   55.43    3.60
  -4  -3  11   54.58    3.68
   4   3 -11   51.03    3.33
   4   3 -11   54.56    3.39
   4   3 -10   50.08    3.15
   4  -3 -10   42.06    2.54
  -4  -3  10   57.40    3.43
   4  -3 -10   39.91    2.78
  -4   3  10   40.27    2.92
   4   3 -10   43.65    2.97
  -4  -3  10   39.91    3.04
   4   3 -10   48.17    3.02
  -4  -3  10   56.71    3.42
  -4  -3  10   39.05    2.26
  -4   3   9  413.00   11.46
   4   3  -9  411.98   10.47
   4  -3  -9  395.38    9.69
  -4  -3   9  414.76   10.79
   4  -3  -9  457.27   10.81
  -4   3   9  421.38   10.76
  -4  -3   9  412.52   11.06
   4   3  -9  432.43   10.52
  -4  -3   9  412.22    9.45
  -4  -3   9  381.73   10.62
   4   3  -9  427.13   10.57
  -4  -3   8  857.09   17.53
  -4   3   8  869.35   19.43
   4   3  -8  909.31   18.56
  -4   3   8  926.94   17.50
  -4  -3   8  928.55   19.30
   4  -3  -8  952.00   18.91
  -4   3   8  903.57   18.68
  -4  -3   8  935.64   19.35
   4   3  -8  932.53   18.51
  -4   3   8  939.31   17.53
   4   3  -8  899.32   18.59
  -4  -3   8  888.11   19.10
  -4   3   7  252.87    7.55
   4   3  -7  245.28    6.89
  -4   3   7  249.24    6.42
  -4  -3   7  266.12    7.65
  -4  -3   7  242.59    7.45
  -4   3   7  248.81    6.89
  -4  -3   7  253.53    7.46
   4   3  -7  252.06    6.87
  -4   3   7  260.71    6.53
  -4  -3   7  252.67    6.45
  -4  -3   7  247.95    7.45
   4   3  -7  254.33    7.07
   4  -3  -6    2.32    0.86
  -4   3   6    4.54    1.01
   4   3  -6    4.82    0.91
  -4   3   6    3.88    0.78
   4  -3  -6    3.54    0.91
  -4   3   6    4.86    0.82
  -4   3   6    3.98    0.78
  -4  -3   6    4.04    0.75
  -4  -3   6    5.15    1.07
  -4  -3   6    4.92    1.09
   4   3  -6    6.21    1.08
   4   3  -6    5.50    0.93
  -4   3   5   27.95    1.97
  -4  -3   5   34.46    2.14
  -4   3   5   28.42    1.81
   4   3  -5   26.26    1.68
  -4  -3   5   28.94    2.12
   4  -3  -5   29.37    2.09
  -4  -3   5   28.28    2.03
  -4   3   5   28.73    1.81
   4   3  -5   30.72    1.76
  -4  -3   5   28.45    2.08
   4   3  -5   27.39    1.88
   4  -3  -5   28.07    2.11
  -4  -3   5   28.42    1.69
  -4   3   4 4555.15   77.99
  -4  -3   4 4649.84   78.19
   4   3  -4 4656.32   78.08
  -4  -3   4 4615.89   78.76
  -4  -3   4 4685.45   78.79
  -4   3   4 4450.63   79.33
  -4   3   4 4657.20   78.03
   4  -3  -4 4621.49   78.93
  -4  -3   4 4743.44   77.59
   4   3  -4 4621.47   77.30
  -4   3   4 4675.41   78.42
  -4  -3   3   25.55    1.93
  -4   3   3   27.74    1.78
  -4  -3   3   33.29    1.82
  -4  -3   3   28.32    1.98
   4  -3  -3   31.51    2.08
   4  -3  -3   33.26    2.09
  -4   3   3   26.94    2.08
  -4   3   3   26.25    1.75
  -4  -3   3   27.89    1.63
   4   3  -3   29.69    1.44
  -4  -3   3   24.92    1.86
   4   3  -3   29.26    1.70
   4  -3  -3   28.20    2.07
  -4   3   3   24.86    1.77
  -4   3   2  145.32    4.47
  -4  -3   2  150.35    4.09
   4  -3  -2  148.75    4.71
  -4   3   2  137.78    4.80
  -4  -3   2  154.62    4.29
   4   3  -2  144.40    3.46
  -4   3   2  147.42    4.47
  -4   3   2  150.19    4.64
   4  -3  -2  146.64    4.93
   4   3  -2  148.65    4.02
  -4  -3   1  188.48    4.46
  -4   3   1  182.53    5.26
  -4   3   1  187.29    5.42
   4   3  -1  187.57    4.40
  -4  -3   1  186.03    5.39
  -4  -3   1  190.74    5.02
  -4   3   1  174.82    5.46
  -4   3   1  187.51    5.43
  -4   3   1  181.67    5.22
  -4  -3   1  185.34    5.38
   4  -3  -1  185.48    5.67
   4  -3  -1  195.03    5.37
  -4   3   1  192.63    5.38
  -4   3   0  161.18    4.88
  -4  -3   0  167.41    4.96
  -4   3   0  168.80    4.99
  -4  -3   0  170.65    5.00
  -4   3   0  172.86    5.25
  -4   3   0  175.78    5.06
   4   3   0  168.35    3.65
  -4   3   0  157.46    4.88
   4  -3   0  178.21    4.95
  -4   3   0  165.87    4.83
  -4  -3   0  170.18    4.72
   4  -3   0  171.40    5.32
  -4  -3   0  167.54    3.74
  -4   3   0  179.16    5.13
  -4   3  -1   72.33    3.02
  -4  -3  -1   87.70    3.27
  -4   3  -1   79.84    3.14
   4  -3   1   80.53    3.04
  -4   3  -1   85.47    3.33
  -4   3  -1   74.30    3.08
  -4  -3  -1   84.97    3.22
  -4  -3  -1   78.15    3.01
  -4  -3  -1   82.49    3.15
   4  -3   1   82.06    3.45
  -4   3  -2  995.12   18.81
  -4  -3  -2  955.80   18.69
  -4   3  -2  967.18   18.80
   4  -3   2  983.97   18.54
  -4  -3  -2  975.43   18.66
  -4   3  -2  993.37   18.77
  -4  -3  -2 1006.26   18.73
  -4   3  -2  994.20   18.79
  -4  -3  -2 1010.74   18.85
   4  -3   2  999.09   19.44
  -4   3  -2  979.13   19.03
  -4   3  -2  988.15   19.07
  -4   3  -3 1528.05   28.07
  -4  -3  -3 1527.07   28.13
  -4   3  -3 1521.12   27.99
  -4  -3  -3 1495.16   27.75
  -4  -3  -3 1570.43   27.38
   4  -3   3 1587.88   28.82
  -4   3  -3 1502.52   27.99
  -4   3  -3 1498.33   28.41
  -4  -3  -3 1532.33   28.04
  -4  -3  -3 1636.98   27.98
  -4   3  -3 1614.39   28.60
   4  -3   3 1591.66   27.73
  -4   3  -4   11.01    1.20
  -4   3  -4   13.10    1.30
  -4  -3  -4   13.15    1.21
  -4   3  -4   14.29    1.52
   4  -3   4   13.28    1.16
  -4   3  -4   14.00    1.32
  -4   3  -4   13.98    1.46
  -4  -3  -4   13.07    1.18
  -4  -3  -4   14.65    1.39
   4  -3   4   14.69    1.51
  -4   3  -5  211.27    5.90
  -4   3  -5  216.38    6.04
  -4  -3  -5  220.85    5.97
  -4   3  -5  219.20    6.55
  -4  -3  -5  212.02    6.28
  -4   3  -5  208.30    5.88
   4  -3   5  213.92    5.53
  -4  -3  -5  216.80    6.06
  -4   3  -6  658.49   13.91
  -4  -3  -6  709.27   14.33
  -4   3  -6  677.82   14.96
  -4   3  -6  679.65   14.25
  -4   3  -6  657.43   13.86
  -4  -3  -6  704.81   14.71
  -4  -3  -6  678.64   14.29
  -4   3  -7   32.28    1.99
  -4   3  -7   32.61    2.17
  -4  -3  -7   34.83    2.34
  -4   3  -7   30.88    2.45
  -4   3  -7   30.63    1.93
  -4  -3  -7   34.11    2.40
  -4   3  -7   35.43    2.57
  -4   3  -7   31.94    2.45
  -4  -3  -7   32.17    2.21
  -4  -3  -8   57.38    3.04
  -4   3  -8   49.46    2.46
  -4   3  -8   57.86    2.99
  -4  -3  -8   56.73    3.14
  -4   3  -8   56.87    3.42
  -4   3  -8   55.13    3.37
  -4   3  -8   52.80    2.51
  -4  -3  -8   61.48    3.32
  -4   3  -8   53.54    3.26
  -4  -3  -9   14.57    1.67
  -4   3  -9   13.21    1.49
  -4  -3  -9   13.95    1.71
  -4   3  -9    9.27    1.66
  -4   3  -9   12.44    1.77
  -4   3  -9   13.16    1.79
  -4   3 -10 3280.12   58.43
  -4  -3 -10 3256.43   57.06
  -4   3 -10 3011.24   56.31
  -4  -3 -10 3448.24   57.95
  -4   3 -10 3181.40   58.15
  -4   3 -10 3268.07   57.81
  -4  -3 -11  353.84    9.65
  -4  -3 -11  336.41    9.83
  -4   3 -11  351.52   10.42
  -4   3 -11  356.05   10.53
  -4   3 -11  355.78   10.17
  -4  -3 -12  989.83   20.81
  -4  -3 -12 1017.97   21.43
  -4   3 -12 1006.44   21.86
  -4   3 -12  990.01   21.85
  -4   3 -12  961.89   21.10
  -4   3 -13  173.68    6.85
  -4  -3 -13  188.63    6.77
  -4   3 -13  174.73    6.82
  -4   3 -13  179.83    6.52
  -4  -3 -14    0.90    1.07
  -4   3 -14    1.04    1.10
   4   3  14    0.96    1.42
  -4   3 -14    1.34    1.04
  -4   3 -14    3.18    1.08
  -4  -3 -15  597.39   13.78
  -4   3 -15  583.01   13.90
  -4  -3 -15  602.03   13.64
   4   3  15  562.15   15.19
  -4   3 -15  571.81   13.97
  -4   3 -15  597.89   13.23
  -4  -3 -16   91.55    3.77
  -4   3 -16   90.13    3.91
   4   3  16   89.57    4.36
  -4   3 -16   86.84    3.88
  -4   3 -16   83.29    3.35
  -4   3 -17    9.44    1.14
   4   3  17    8.73    1.16
  -4  -3 -17    9.35    1.07
   4  -4 -18  892.34   17.70
  -4  -4  18  924.06   17.92
   4   4 -18  875.88   17.64
   4  -4 -17    1.73    0.98
  -4  -4  17    0.36    0.81
   4  -4 -17    0.61    0.60
  -4   4  17    0.27    0.72
   4   4 -17    1.42    0.96
   4  -4 -16   16.67    1.65
  -4   4  16   17.50    1.97
  -4  -4  16   19.52    2.20
   4   4 -16   14.86    1.96
   4  -4 -15  356.08    9.35
  -4   4  15  361.93   10.41
   4  -4 -15  355.76   10.19
  -4  -4  15  365.56   10.61
   4   4 -15  349.80   10.60
   4   4 -15  380.50   10.45
   4  -4 -14  656.83   14.73
  -4   4  14  670.98   16.07
  -4  -4  14  676.40   16.26
   4   4 -14  637.32   16.05
   4  -4 -14  619.02   13.84
   4   4 -14  689.64   15.94
   4   4 -13  857.42   19.48
   4  -4 -13  843.33   18.03
  -4   4  13  893.98   19.61
   4   4 -13  832.62   17.59
  -4  -4  13  889.73   19.78
   4   4 -13  869.01   19.22
   4  -4 -13  855.57   17.51
   4   4 -13  794.63   17.45
   4  -4 -12    1.23    1.03
   4   4 -12    1.21    0.98
   4  -4 -12    1.94    0.95
   4   4 -12    3.35    1.24
  -4   4  12    0.76    0.97
  -4  -4  12    1.11    0.70
  -4  -4  12    0.89    1.16
   4  -4 -12    1.47    0.92
   4   4 -12    1.56    1.27
   4   4 -12    4.18    1.35
  -4  -4  11  410.53   10.37
   4  -4 -11  443.51   10.90
   4  -4 -11  448.04   11.68
   4   4 -11  431.04   11.48
  -4   4  11  449.50   11.88
  -4  -4  11  448.73   12.14
   4  -4 -11  458.36   10.81
   4   4 -11  441.51   11.55
   4   4 -11  442.32   11.61
   4   4 -11  430.81   11.67
   4   4 -10 1386.13   27.99
   4  -4 -10 1432.86   27.21
   4  -4 -10 1465.84   28.24
   4   4 -10 1390.51   28.25
  -4   4  10 1447.31   28.25
  -4  -4  10 1433.24   26.94
  -4  -4  10 1461.61   28.75
   4   4 -10 1387.32   28.33
   4   4 -10 1419.03   27.91
  -4   4   9 1183.27   24.78
   4  -4  -9 1175.54   23.07
  -4  -4   9 1158.73   24.49
   4  -4  -9 1225.68   24.12
   4   4  -9 1197.40   23.83
  -4   4   9 1214.68   23.79
  -4  -4   9 1211.01   24.46
  -4  -4   9 1170.98   22.87
  -4  -4   9 1134.31   24.46
   4   4  -9 1212.84   23.76
  -4   4   8 1144.40   23.70
  -4   4   8 1142.00   21.60
  -4  -4   8 1205.99   24.07
   4  -4  -8 1230.58   23.52
  -4   4   8 1118.39   22.46
  -4  -4   8 1138.52   22.29
  -4  -4   8 1167.16   23.48
  -4   4   8 1159.07   21.64
   4   4  -8 1188.79   22.90
  -4  -4   8 1133.99   23.84
   4   4  -8 1144.25   22.78
  -4   4   7  201.33    6.52
   4   4  -7  195.28    6.03
  -4   4   7  194.55    5.54
  -4  -4   7  193.12    6.76
   4  -4  -7  195.68    6.45
  -4   4   7  196.58    5.73
  -4  -4   7  191.95    5.78
  -4  -4   7  200.13    6.53
  -4   4   7  196.90    5.63
   4   4  -7  197.14    6.00
  -4  -4   7  190.10    6.75
  -4   4   6   26.59    2.07
  -4   4   6   26.06    1.83
  -4  -4   6   24.62    2.04
  -4  -4   6   30.14    2.49
   4  -4  -6   28.67    2.25
  -4  -4   6   28.92    2.41
  -4  -4   6   25.86    2.12
  -4   4   6   27.68    1.87
  -4  -4   6   27.77    1.90
   4   4  -6   28.66    2.00
   4   4  -6   25.62    1.83
  -4  -4   5  711.94   14.52
  -4   4   5  721.91   14.51
  -4  -4   5  679.10   14.92
   4  -4  -5  738.03   15.49
  -4  -4   5  718.65   15.79
   4  -4  -5  695.72   15.60
   4   4  -5  720.00   14.24
  -4  -4   5  709.79   15.18
  -4   4   5  714.97   14.52
  -4   4   5  696.03   14.84
  -4  -4   5  729.07   15.77
   4   4  -5  706.36   14.44
  -4   4   4 1405.81   25.47
   4   4  -4 1342.75   24.98
  -4  -4   4 1362.30   25.56
   4  -4  -4 1332.93   26.32
   4  -4  -4 1378.96   26.40
  -4  -4   4 1419.74   26.63
  -4   4   4 1396.08   25.44
  -4  -4   4 1383.05   25.28
  -4  -4   4 1384.35   25.99
   4   4  -4 1371.38   25.52
  -4  -4   4 1360.54   26.45
   4   4  -4 1367.69   24.74
  -4   4   4 1403.62   25.72
  -4   4   3  803.53   15.92
  -4  -4   3  809.92   15.65
   4   4  -3  796.40   15.59
   4  -4  -3  796.65   16.61
  -4   4   3  787.98   17.24
  -4   4   3  813.15   15.89
  -4  -4   3  776.41   16.13
  -4  -4   3  804.18   15.76
   4   4  -3  767.51   15.14
   4   4  -3  791.09   14.81
  -4   4   3  805.58   16.05
   4  -4  -3  789.83   16.58
  -4   4   2  100.88    3.71
  -4  -4   2  100.56    3.31
  -4   4   2   96.89    4.01
   4   4  -2  100.15    3.32
   4   4  -2   99.24    2.82
   4  -4  -2   97.09    3.97
  -4   4   2  101.64    4.11
  -4   4   2  101.04    3.70
  -4  -4   2  103.74    3.87
  -4  -4   2  105.72    3.68
  -4   4   2   97.13    3.75
  -4   4   1 4013.27   68.34
  -4  -4   1 4000.12   67.12
  -4   4   1 4022.64   69.01
  -4  -4   1 4053.08   69.08
  -4  -4   1 4144.48   68.30
  -4   4   1 4132.75   69.08
   4   4  -1 3984.71   67.11
  -4   4   1 3992.94   68.30
   4  -4  -1 3924.58   68.75
  -4  -4   1 3987.12   68.52
  -4  -4   1 4017.28   68.98
  -4   4   1 4048.10   68.55
  -4   4   0 3283.53   56.13
  -4  -4   0 3162.02   54.25
  -4   4   0 3331.85   56.62
  -4  -4   0 3365.77   56.04
  -4  -4   0 3340.20   56.74
  -4   4   0 3379.07   56.67
   4  -4   0 3291.71   56.38
  -4   4   0 3291.36   56.11
  -4  -4   0 3288.87   56.20
  -4  -4   0 3246.91   56.57
  -4   4   0 3315.70   56.31
  -4  -4  -1 1275.90   21.18
  -4   4  -1 1268.14   21.70
   4  -4   1 1280.42   22.54
  -4  -4  -1 1304.76   21.66
   4  -4   1 1288.26   21.41
  -4   4  -1 1334.09   21.74
  -4   4  -1 1277.21   21.99
  -4  -4  -1 1333.07   21.68
  -4  -4  -1 1225.35   21.12
  -4   4  -1 1274.48   21.72
  -4   4  -1 1340.86   21.65
  -4   4  -2  678.08   13.81
   4  -4   2  648.72   13.68
  -4   4  -2  644.03   13.98
  -4  -4  -2  671.92   13.98
  -4   4  -2  652.14   13.92
  -4   4  -2  677.91   14.38
  -4   4  -2  667.99   13.76
  -4   4  -2  622.14   14.10
  -4  -4  -2  639.57   13.80
  -4   4  -2  684.89   14.14
  -4   4  -3  132.47    4.50
  -4   4  -3  138.24    4.71
   4  -4   3  129.83    4.40
  -4  -4  -3  126.67    3.76
  -4   4  -3  132.41    4.88
  -4   4  -3  134.87    4.52
  -4  -4  -3  127.02    4.41
  -4   4  -3  135.86    4.84
  -4   4  -3  140.64    4.84
  -4   4  -4  638.15   13.65
  -4   4  -4  669.83   14.06
  -4  -4  -4  651.39   12.97
  -4  -4  -4  630.94   13.38
  -4   4  -4  668.07   14.48
  -4   4  -4  646.37   14.34
  -4   4  -4  638.87   13.65
  -4  -4  -4  666.02   13.97
  -4  -4  -4  623.36   13.33
   4  -4   4  634.41   13.46
  -4   4  -4  658.37   14.24
  -4   4  -5  360.54    8.90
  -4   4  -5  379.70    9.29
  -4  -4  -5  344.38    8.43
  -4   4  -5  356.43    9.56
  -4  -4  -5  363.77    9.23
  -4   4  -5  360.18    8.86
  -4   4  -5  376.36    9.59
  -4  -4  -6   21.75    1.96
  -4   4  -6   18.75    1.70
  -4   4  -6   20.50    1.85
  -4  -4  -6   24.97    1.87
  -4   4  -6   18.58    1.97
  -4   4  -6   19.39    1.70
  -4   4  -6   20.30    2.02
  -4   4  -7  160.95    5.71
  -4  -4  -7  169.05    5.60
  -4   4  -7  166.33    6.17
  -4  -4  -7  171.78    5.92
  -4   4  -7  162.54    5.25
  -4   4  -7  173.52    6.29
  -4   4  -7  165.55    5.30
  -4  -4  -8 1009.48   20.79
  -4   4  -8  997.48   19.56
  -4   4  -8 1002.36   20.66
  -4  -4  -8 1004.68   20.48
  -4   4  -8  998.98   21.41
  -4   4  -8 1013.95   19.57
  -4   4  -8 1000.58   21.51
  -4  -4  -9  210.13    6.80
  -4  -4  -9  197.78    6.46
  -4   4  -9  181.97    5.44
  -4   4  -9  187.28    6.41
  -4  -4  -9  193.39    6.49
  -4   4  -9  193.20    7.05
  -4   4  -9  173.89    5.36
  -4   4  -9  198.49    7.26
  -4  -4 -10 1451.48   27.87
  -4  -4 -10 1472.03   28.12
  -4   4 -10 1399.00   28.79
  -4   4 -10 1414.46   29.12
  -4   4 -10 1480.10   28.92
  -4  -4 -11  266.30    8.13
  -4  -4 -11  266.08    8.31
  -4   4 -11  260.70    8.78
  -4   4 -11  263.01    8.95
  -4   4 -11  272.45    8.68
  -4  -4 -12  385.23   10.36
  -4  -4 -12  370.92   10.39
  -4   4 -12  370.25   10.87
  -4   4 -12  374.29   11.19
  -4   4 -12  386.27   10.78
  -4  -4 -13  163.69    6.01
  -4   4 -13  158.95    6.63
  -4  -4 -13  160.23    6.12
  -4   4 -13  164.09    6.45
  -4   4 -13  163.02    6.22
  -4  -4 -14  510.96   12.29
  -4   4 -14  482.40   12.42
   4  -4  14  473.67   13.99
  -4   4 -14  490.78   12.77
  -4   4 -14  497.53   12.17
  -4  -4 -15  469.77   11.14
  -4   4 -15  435.84   11.03
   4   4  15  439.40   12.80
   4  -4  15  438.89   12.45
  -4   4 -15  431.10   11.30
  -4   4 -15  462.11   10.85
  -4  -4 -16  366.27    8.93
  -4   4 -16  351.57    8.77
   4   4  16  362.77    9.92
   4  -4  16  357.36    9.88
  -4  -4 -16  356.55    8.67
  -4   4 -16  352.59    8.44
   4  -5 -18    0.32    0.57
  -4  -5  18    0.44    0.58
   4   5 -18    0.42    0.66
   4  -5 -17  377.33    9.25
   4  -5 -17  358.89    8.42
  -4  -5  17  374.21    9.27
   4   5 -17  379.36    9.32
   4  -5 -16 1223.75   23.82
   4  -5 -16 1190.66   22.88
  -4   5  16 1125.21   23.08
  -4  -5  16 1171.62   23.90
   4   5 -16 1252.45   23.96
   4  -5 -15 1891.59   35.89
   4  -5 -15 1887.99   34.96
  -4   5  15 1869.15   35.44
  -4  -5  15 1941.73   36.25
   4   5 -15 1898.82   35.96
   4  -5 -14  246.80    7.49
  -4   5  14  244.42    7.86
   4  -5 -14  238.96    7.93
  -4  -5  14  253.13    8.30
   4   5 -14  240.86    8.36
   4   5 -14  249.36    8.11
   4   5 -13    0.78    0.92
   4  -5 -13    0.07    0.89
   4   5 -13    0.47    0.82
   4   5 -13    0.80    0.82
  -4   5  13    0.17    0.90
  -4  -5  13    1.15    1.19
  -4  -5  13    2.06    0.80
   4   5 -13    2.72    1.47
   4  -5 -12  412.97   10.61
  -4   5  12  391.10   10.90
   4   5 -12  417.33   10.82
  -4  -5  12  419.74   11.71
  -4  -5  12  396.20   10.07
   4  -5 -12  382.72    9.43
   4   5 -12  416.29   11.25
   4   5 -12  399.89   10.68
   4   5 -12  390.30   11.37
   4  -5 -11 1987.91   37.09
   4  -5 -11 1992.79   38.02
  -4   5  11 2014.71   37.68
   4   5 -11 2033.47   38.05
  -4  -5  11 2011.58   38.66
  -4  -5  11 1997.61   36.81
   4   5 -11 2012.91   38.32
   4   5 -11 2096.80   38.19
   4  -5 -11 1940.38   36.07
   4   5 -11 1971.85   37.81
  -4  -5  10 1769.19   32.77
   4  -5 -10 1788.48   32.86
   4  -5 -10 1799.68   33.76
  -4   5  10 1707.19   32.88
   4   5 -10 1688.44   33.82
  -4  -5  10 1696.30   33.91
   4   5 -10 1705.13   33.52
   4  -5 -10 1714.61   31.91
   4   5 -10 1756.86   34.01
   4   5 -10 1773.72   33.30
   4  -5  -9  665.50   14.73
   4   5  -9  643.66   15.10
   4  -5  -9  659.46   15.42
   4   5  -9  651.29   15.91
  -4   5   9  637.58   14.44
  -4  -5   9  670.94   15.66
  -4  -5   9  657.68   14.61
   4   5  -9  694.96   16.19
   4   5  -9  668.86   15.02
  -4   5   8  101.15    4.65
   4  -5  -8  101.65    4.65
   4   5  -8  103.88    5.03
  -4  -5   8  100.66    4.63
  -4  -5   8   92.48    4.11
   4   5  -8   91.27    4.76
   4   5  -8   93.12    4.13
   4   5  -8   92.56    4.21
  -4   5   7  386.15   10.06
  -4   5   7  386.90    9.09
   4  -5  -7  390.35   10.39
  -4  -5   7  366.47   10.70
  -4   5   7  389.40    9.13
  -4  -5   7  373.64   10.22
  -4  -5   7  377.36    9.63
   4   5  -7  383.40    9.66
   4   5  -7  373.31    9.47
  -4  -5   7  385.20   10.93
  -4   5   6 1243.49   24.37
  -4   5   6 1247.65   23.78
  -4  -5   6 1254.23   24.24
   4  -5  -6 1303.21   25.31
   4   5  -6 1235.74   23.75
  -4  -5   6 1247.42   25.87
  -4   5   6 1251.02   23.73
  -4  -5   6 1234.65   24.84
   4   5  -6 1280.49   24.02
  -4  -5   6 1281.84   25.99
  -4   5   5   36.19    2.37
  -4   5   5   40.04    2.36
  -4  -5   5   39.17    2.53
   4  -5  -5   38.37    2.79
  -4  -5   5   40.44    2.98
  -4  -5   5   36.80    2.36
  -4   5   5   39.78    2.34
  -4  -5   5   36.29    2.85
   4   5  -5   38.14    2.20
   4   5  -5   37.91    2.21
  -4  -5   5   38.19    2.60
  -4   5   4  866.85   17.38
  -4  -5   4  839.31   17.45
   4   5  -4  819.88   16.54
   4  -5  -4  890.58   18.63
  -4  -5   4  850.17   18.80
  -4   5   4  881.80   17.39
  -4  -5   4  878.58   17.94
  -4  -5   4  897.04   17.67
  -4  -5   4  871.83   18.82
   4   5  -4  874.27   16.72
  -4   5   4  859.00   17.45
  -4   5   3   62.40    3.03
  -4  -5   3   61.96    2.85
  -4   5   3   59.37    2.95
  -4  -5   3   60.97    3.12
  -4  -5   3   66.59    3.09
   4  -5  -3   60.55    3.37
   4   5  -3   65.07    2.55
  -4   5   3   60.15    2.96
  -4   5   2 2225.03   39.33
  -4   5   2 2181.82   40.42
  -4  -5   2 2169.34   38.52
  -4  -5   2 2178.60   40.55
  -4   5   2 2210.99   40.98
  -4   5   2 2279.66   40.46
  -4   5   2 2268.32   39.37
   4  -5  -2 2121.41   40.10
  -4  -5   2 2273.93   39.46
  -4  -5   2 2164.12   39.54
  -4  -5   2 2156.90   40.55
  -4   5   2 2240.23   39.46
  -4   5   1   15.03    1.54
  -4   5   1   17.68    1.80
  -4  -5   1   14.52    1.15
  -4  -5   1   16.66    1.58
  -4  -5   1   18.36    1.95
  -4   5   1   20.52    2.07
  -4   5   1   14.96    1.72
   4  -5  -1   17.76    1.74
  -4   5   1   20.05    1.71
  -4  -5   1   15.42    1.80
  -4  -5   1   14.53    1.54
  -4   5   1   15.74    1.56
  -4   5   0  173.07    5.53
  -4   5   0  180.99    5.98
  -4  -5   0  169.51    4.27
  -4  -5   0  175.53    6.00
   4  -5   0  160.63    5.61
  -4   5   0  176.77    6.14
  -4   5   0  176.17    5.91
  -4   5   0  171.10    5.47
  -4  -5   0  172.97    5.53
  -4  -5   0  173.96    6.00
  -4  -5   0  177.18    5.54
  -4   5   0  170.36    5.50
  -4   5  -1  593.59   12.47
  -4  -5  -1  497.44    9.81
  -4   5  -1  544.51   12.73
   4  -5   1  559.23   12.56
  -4   5  -1  563.73   12.38
  -4  -5  -1  547.29   12.71
  -4   5  -1  568.41   12.76
  -4   5  -1  567.88   13.02
  -4   5  -1  597.21   12.46
  -4  -5  -1  565.73   12.23
  -4  -5  -1  539.25   12.68
   4  -5   2  323.95    8.72
  -4   5  -2  349.68    9.17
  -4   5  -2  351.20    9.10
  -4  -5  -2  319.87    8.78
  -4   5  -2  361.87    9.41
   4  -5   2  339.91    8.90
  -4   5  -2  329.74    9.12
  -4  -5  -2  320.02    8.80
  -4  -5  -2  337.75    8.58
  -4   5  -2  345.66    8.86
  -4   5  -3 1727.92   31.47
  -4   5  -3 1738.37   31.94
  -4   5  -3 1698.41   32.26
  -4   5  -3 1709.47   31.41
   4  -5   3 1664.65   32.26
  -4   5  -3 1674.37   32.19
  -4  -5  -3 1732.95   31.34
  -4  -5  -3 1738.59   31.54
   4  -5   3 1593.76   31.28
  -4   5  -3 1676.27   31.64
  -4   5  -4 4941.28   83.33
  -4   5  -4 4552.99   84.08
  -4   5  -4 5052.50   83.98
  -4  -5  -4 4860.73   81.86
  -4   5  -4 4933.82   84.35
  -4   5  -4 4909.78   83.29
   4  -5   4 4647.47   83.12
  -4  -5  -4 4973.63   83.54
  -4  -5  -4 5019.17   83.33
  -4   5  -4 4972.30   83.87
  -4   5  -5   45.17    2.93
  -4  -5  -5   44.14    2.38
  -4   5  -5   46.05    3.09
  -4   5  -5   46.70    2.75
  -4  -5  -5   48.87    2.95
  -4  -5  -5   43.53    2.71
  -4   5  -5   45.72    2.74
  -4   5  -5   46.80    3.04
  -4   5  -6   67.51    3.31
  -4   5  -6   66.50    3.62
  -4  -5  -6   65.35    3.09
  -4   5  -6   58.42    3.63
  -4   5  -6   64.45    3.25
  -4  -5  -6   65.58    3.52
  -4   5  -6   62.71    3.83
  -4   5  -6   62.89    3.61
  -4  -5  -6   58.71    3.22
  -4   5  -7 1460.66   28.07
  -4  -5  -7 1551.87   29.11
  -4   5  -7 1483.19   29.18
  -4  -5  -7 1483.11   28.12
  -4   5  -7 1455.39   29.63
  -4   5  -7 1490.89   28.09
  -4   5  -7 1453.51   29.95
  -4   5  -7 1557.40   29.56
  -4  -5  -7 1495.38   28.61
  -4   5  -8 1553.78   29.09
  -4   5  -8 1518.29   30.30
  -4  -5  -8 1572.09   29.51
  -4   5  -8 1518.44   30.78
  -4   5  -8 1549.49   29.05
  -4  -5  -8 1598.38   30.26
  -4   5  -8 1536.79   31.35
  -4   5  -8 1574.72   30.77
  -4   5  -9 6791.90  117.83
  -4  -5  -9 7194.16  119.61
  -4   5  -9 6876.40  119.66
  -4  -5  -9 7252.39  119.14
  -4   5  -9 7024.41  120.57
  -4   5  -9 6950.99  117.87
  -4   5  -9 7200.91  121.18
  -4   5  -9 7273.47  120.47
  -4   5 -10 1294.63   26.69
  -4  -5 -10 1329.02   26.44
  -4   5 -10 1341.67   27.63
  -4   5 -10 1386.28   28.26
  -4  -5 -11  823.41   17.40
  -4   5 -11  762.30   18.03
  -4   5 -11  790.22   18.62
  -4  -5 -12   18.01    2.00
  -4   5 -12   15.08    2.03
  -4   5 -12   18.14    2.38
   4  -5  12   15.25    2.52
  -4   5 -13  922.06   20.88
  -4  -5 -13  967.32   20.01
  -4   5 -13  920.55   20.39
   4  -5  13  951.59   22.43
  -4   5 -13  992.02   20.60
  -4  -5 -14  471.10   11.41
   4  -5  14  484.00   13.26
  -4   5 -14  457.22   11.68
  -4   5 -14  453.51   12.01
  -4   5 -14  494.77   11.79
  -4  -5 -15   30.07    2.14
   4  -5  15   28.49    2.56
  -4   5 -15   31.62    2.22
   4   5  15   30.55    2.89
  -4   5 -15   29.12    2.14
  -4   5 -16    2.54    0.74
  -4  -5 -16    3.36    0.81
   4  -5  16    1.95    0.84
   4   5  16    2.05    0.94
  -4  -5 -16    3.07    0.75
   4  -6 -17  258.88    6.71
   4  -6 -17  246.85    6.23
  -4  -6  17  247.79    6.49
   4   6 -17  255.31    6.75
   4  -6 -16  175.98    5.69
   4  -6 -16  172.80    5.32
  -4  -6  16  166.12    5.56
   4   6 -16  169.46    5.68
   4  -6 -15  109.34    4.61
   4  -6 -15  110.84    4.33
  -4  -6  15  103.40    4.55
   4   6 -15  111.31    4.66
   4  -6 -14   11.16    1.72
   4  -6 -14    9.26    1.42
  -4   6  14    8.62    1.24
  -4  -6  14    7.44    1.05
  -4  -6  14    8.56    1.58
   4   6 -14    8.62    1.54
   4  -6 -13  723.56   15.65
   4  -6 -13  684.95   16.00
  -4   6  13  641.24   14.91
   4   6 -13  708.23   15.16
  -4  -6  13  719.94   16.40
  -4  -6  13  661.29   14.62
   4   6 -13  691.06   15.98
   4   6 -13  682.32   16.43
   4   6 -13  686.34   15.03
  -4  -6  12  367.72    9.67
   4  -6 -12  381.79   10.15
   4  -6 -12  354.43   10.39
  -4   6  12  345.08    9.54
   4   6 -12  368.52   10.12
  -4  -6  12  382.82   10.85
   4   6 -12  384.17   10.48
   4   6 -12  381.21   10.22
   4   6 -12  385.47   10.93
   4   6 -11 3295.36   59.66
   4  -6 -11 3276.89   59.01
   4   6 -11 3373.28   59.80
  -4  -6  11 3376.07   60.13
   4   6 -11 3362.45   59.39
   4   6 -11 3321.34   60.01
  -4  -6  11 3303.72   58.71
   4  -6 -10  108.69    4.79
   4   6 -10  123.20    5.58
  -4  -6  10  109.15    5.22
  -4  -6  10  110.23    4.77
   4   6 -10  115.48    5.43
   4   6 -10  112.04    4.91
   4   6 -10  112.38    5.18
   4  -6  -9    0.22    0.95
   4   6  -9    0.84    0.90
   4   6  -9    2.16    1.39
   4  -6  -9    0.82    0.95
  -4  -6   9    0.26    1.00
   4   6  -9    1.32    1.02
   4   6  -9    1.47    1.31
   4  -6  -8   68.38    3.99
   4   6  -8   71.27    4.36
   4   6  -8   74.20    4.43
  -4  -6   8   73.40    4.07
   4   6  -8   74.51    3.71
   4   6  -8   70.39    3.75
  -4  -6   8   69.04    3.67
  -4   6   7 1086.35   22.10
  -4   6   7 1078.64   21.04
   4  -6  -7 1110.93   23.05
  -4   6   7 1106.01   21.10
  -4  -6   7 1058.26   22.57
  -4  -6   7 1089.06   22.07
   4   6  -7 1061.65   21.38
   4   6  -7 1085.11   21.92
  -4   6   6    1.98    0.85
  -4   6   6    1.85    0.80
   4   6  -6    0.88    0.72
   4  -6  -6    1.06    1.02
  -4   6   6    1.55    0.79
  -4  -6   6    0.54    0.83
   4   6  -6    1.62    0.77
  -4  -6   6    1.18    0.79
  -4   6   5 1127.18   22.61
  -4   6   5 1162.19   22.69
   4  -6  -5 1208.52   24.40
   4   6  -5 1167.77   24.48
  -4   6   5 1165.32   22.63
  -4  -6   5 1151.75   23.48
  -4  -6   5 1166.66   23.10
   4   6  -5 1167.02   24.53
   4   6  -5 1163.11   22.42
   4   6  -4  383.17    9.08
  -4   6   4  391.37    9.67
   4  -6  -4  394.02   10.88
  -4   6   4  389.91    9.64
  -4  -6   4  401.55    9.98
  -4  -6   4  378.22    9.98
  -4   6   4  372.31    9.45
  -4   6   3   73.22    3.45
  -4  -6   3   65.47    3.17
  -4   6   3   70.41    3.37
  -4  -6   3   63.65    3.43
  -4  -6   3   72.73    3.54
  -4   6   3   68.24    3.30
  -4   6   2  656.52   13.82
  -4   6   2  587.96   14.47
  -4  -6   2  578.16   12.81
  -4   6   2  597.58   15.24
  -4   6   2  640.65   13.74
  -4  -6   2  639.65   13.86
  -4  -6   2  602.26   13.81
  -4   6   2  613.68   13.52
  -4   6   1  137.84    5.00
  -4   6   1  138.78    5.51
  -4   6   1  134.89    5.88
  -4   6   1  134.30    5.47
  -4   6   1  136.21    4.95
  -4  -6   1  128.64    4.91
  -4  -6   1  135.96    5.01
  -4   6   1  126.71    4.77
  -4   6   0 1181.89   23.10
  -4   6   0 1159.97   23.92
  -4   6   0 1158.61   24.47
  -4   6   0 1217.59   24.13
  -4   6   0 1202.00   23.12
  -4  -6   0 1144.40   22.90
  -4   6   0 1155.44   22.98
  -4   6  -1  822.73   17.29
  -4   6  -1  820.95   17.97
  -4   6  -1  844.43   18.10
  -4   6  -1  831.06   18.44
   4   6   1  792.89   17.55
  -4   6  -1  823.93   17.24
  -4  -6  -1  809.58   17.06
   4   6   1  783.64   17.55
  -4   6  -1  818.02   17.18
  -4   6  -2   16.75    1.80
  -4   6  -2   21.13    2.12
  -4   6  -2   20.24    2.09
  -4   6  -2   22.60    2.27
   4   6   2   19.27    1.93
   4  -6   2   19.73    1.83
   4   6   2   17.73    1.87
  -4  -6  -2   20.96    1.93
  -4  -6  -2   20.32    1.96
  -4   6  -3 2050.94   40.48
  -4   6  -3 2192.20   40.64
  -4   6  -3 2215.29   40.62
  -4   6  -3 2242.95   40.97
   4   6   3 2182.30   39.33
  -4   6  -3 2124.73   39.71
   4  -6   3 2167.43   40.21
  -4  -6  -3 2255.88   40.06
   4   6   3 2107.73   39.16
  -4  -6  -3 2207.39   39.68
  -4   6  -3 2236.07   40.09
  -4   6  -3 2167.32   39.80
  -4   6  -4  726.80   16.01
  -4   6  -4  732.44   16.62
  -4   6  -4  702.55   16.73
  -4   6  -4  716.53   15.94
   4  -6   4  713.21   16.77
  -4  -6  -4  737.46   16.11
  -4  -6  -4  740.66   15.86
  -4   6  -4  730.18   16.27
  -4   6  -5  513.54   12.45
  -4   6  -5  537.72   13.25
  -4  -6  -5  494.82   11.19
   4  -6   5  535.56   13.92
  -4   6  -5  504.36   13.44
  -4   6  -5  536.76   12.57
  -4  -6  -5  529.51   12.78
  -4  -6  -5  529.26   12.45
  -4   6  -5  554.13   13.15
  -4   6  -6   86.88    4.07
  -4  -6  -6   84.86    4.06
  -4  -6  -6   87.21    4.27
  -4   6  -6   83.71    4.36
  -4  -6  -6   86.21    3.56
  -4   6  -6   89.36    4.64
  -4   6  -6   86.91    4.07
   4  -6   6   79.73    4.76
  -4   6  -6   87.04    4.74
  -4   6  -6   82.47    4.29
   4  -6   7    9.80    1.98
  -4   6  -7   10.39    1.48
  -4  -6  -7   11.56    1.70
  -4  -6  -7   15.08    1.57
  -4   6  -7    8.67    1.71
  -4   6  -7   11.61    1.61
  -4   6  -7   10.92    1.68
  -4  -6  -7   11.42    1.72
  -4   6  -7    8.94    1.82
  -4   6  -7   10.16    1.75
  -4  -6  -8 1337.95   25.81
  -4   6  -8 1281.11   25.08
  -4   6  -8 1272.04   26.48
  -4  -6  -8 1293.27   25.00
  -4   6  -8 1251.18   26.71
  -4   6  -8 1264.70   24.99
   4  -6   8 1295.15   28.36
  -4  -6  -8 1327.08   26.08
  -4   6  -8 1248.45   27.27
  -4   6  -8 1286.00   26.55
  -4   6  -9 2647.94   47.46
  -4  -6  -9 2693.33   48.61
  -4   6  -9 2622.25   49.25
  -4  -6  -9 2691.70   47.91
  -4   6  -9 2709.60   49.79
  -4   6  -9 2644.03   47.44
   4  -6   9 2779.33   51.90
  -4  -6  -9 2736.36   48.82
  -4   6  -9 2575.90   50.30
  -4   6  -9 2692.92   49.57
  -4   6 -10    0.59    0.62
  -4  -6 -10    0.72    0.99
  -4  -6 -10    0.79    0.86
  -4   6 -10    0.87    1.07
  -4   6 -10    0.44    0.83
   4  -6  10    0.92    1.29
  -4   6 -10    0.85    0.64
  -4  -6 -10    1.67    1.02
  -4   6 -10    0.11    1.19
  -4   6 -10    2.55    1.39
  -4  -6 -11  620.85   14.35
  -4   6 -11  557.26   14.10
  -4  -6 -11  618.90   13.99
  -4   6 -11  609.59   14.94
   4  -6  11  625.66   16.60
  -4   6 -11  575.90   15.42
  -4   6 -11  607.67   14.94
   4  -6  12  239.27    8.89
  -4  -6 -12  239.19    7.50
  -4  -6 -12  233.43    7.14
  -4   6 -12  225.56    7.71
  -4  -6 -13 1069.72   20.78
  -4   6 -13 1062.36   21.44
   4  -6  13 1056.99   22.90
   4  -6  14    1.80    1.10
  -4  -6 -14    1.04    0.73
  -4   6 -14    0.13    0.64
  -4  -6 -15   59.77    2.68
  -4   6 -15   58.37    2.70
   4   6  15   54.79    3.58
   4  -6  15   58.71    3.22
  -4   6 -15   60.12    2.88
   4  -7 -16   10.73    1.27
   4  -7 -16   11.16    1.20
  -4  -7  16    9.06    1.08
   4   7 -16    9.63    1.21
   4  -7 -15   52.37    2.90
   4  -7 -15   53.84    2.82
  -4  -7  15   54.87    2.83
   4   7 -15   50.19    2.81
   4  -7 -14  256.78    7.42
   4  -7 -14  248.77    7.10
   4   7 -14  209.79    5.87
  -4  -7  14  243.35    7.19
  -4  -7  14  215.90    6.00
   4   7 -14  242.29    7.14
   4   7 -14  216.54    5.90
   4  -7 -13    0.85    0.92
   4   7 -13    0.06    0.72
  -4  -7  13    1.46    0.76
  -4  -7  13    1.00    0.94
   4   7 -13    0.51    0.97
   4   7 -13    0.43    0.78
   4  -7 -12 1698.14   31.51
   4  -7 -12 1614.67   31.85
   4   7 -12 1645.71   31.39
  -4  -7  12 1680.93   32.00
   4   7 -12 1644.84   31.40
   4   7 -12 1614.63   31.28
   4   7 -12 1577.12   32.09
  -4  -7  12 1635.68   30.88
   4  -7 -11  316.32    9.09
   4  -7 -11  309.27    9.43
   4   7 -11  310.79    9.33
  -4  -7  11  325.85    9.56
  -4  -7  11  320.59    8.89
   4   7 -11  306.43    9.26
   4   7 -11  303.39    8.82
   4   7 -11  286.26    9.22
   4   7 -10   90.80    4.79
   4  -7 -10   95.66    4.53
   4   7 -10   98.72    4.95
  -4  -7  10   91.40    4.70
  -4  -7  10   97.97    4.54
   4   7 -10  100.31    4.48
   4   7 -10   98.81    4.78
   4   7  -9    1.00    1.32
   4  -7  -9    0.56    1.02
   4   7  -9    0.60    0.80
   4   7  -9    2.40    1.42
  -4  -7   9    0.56    0.95
  -4  -7   9    3.97    1.29
   4   7  -9    0.91    0.91
   4   7  -8  981.71   20.99
   4  -7  -8  988.85   20.97
   4   7  -8  973.21   20.09
   4  -7  -8  996.92   21.88
   4   7  -8 1047.96   22.46
  -4  -7   8  988.41   21.40
  -4  -7   8 1006.75   21.09
   4   7  -8 1034.35   22.37
  -4  -7   7    1.43    1.05
  -4   7   7    3.71    0.93
   4   7  -7    2.12    0.92
   4  -7  -7    1.95    1.19
  -4   7   7    3.06    0.91
  -4  -7   7    2.10    1.16
   4   7  -7    1.17    0.77
   4   7  -6 2812.44   50.29
  -4   7   6 2819.19   49.95
   4  -7  -6 2806.83   52.16
   4   7  -6 2835.30   52.60
  -4   7   6 2858.31   49.97
  -4  -7   6 2785.73   50.87
  -4  -7   6 2805.07   51.13
   4   7  -6 2892.56   52.67
  -4   7   5  585.84   13.32
   4  -7  -5  600.26   15.04
   4   7  -5  593.48   15.09
  -4   7   5  588.88   13.28
  -4  -7   5  568.78   13.87
  -4  -7   5  578.31   13.78
   4   7  -5  570.20   14.90
  -4   7   4   28.42    2.15
   4  -7  -4   33.54    2.97
  -4   7   4   35.56    2.51
   4   7  -4   34.93    3.15
  -4   7   4   35.62    2.52
  -4  -7   4   33.33    2.57
  -4  -7   4   33.17    2.59
   4   7  -4   35.76    3.13
  -4   7   3   10.86    1.53
   4   7  -3    5.74    1.75
  -4   7   3    9.98    1.46
  -4  -7   3    7.41    1.41
  -4   7   3    8.71    1.27
   4   7  -3    7.33    1.74
  -4  -7   3    6.48    1.30
  -4   7   2  363.12    9.63
   4   7  -2  365.86   10.62
  -4   7   2  361.47    9.59
  -4  -7   2  360.19    9.70
   4   7  -2  362.79   10.58
  -4   7   2  361.77    9.33
  -4   7   1  286.01    8.24
  -4  -7   1  274.89    8.10
  -4   7   1  291.85    9.81
   4   7  -1  278.31    8.87
  -4   7   1  286.43    8.23
   4   7  -1  279.04    8.85
  -4   7   1  273.72    7.89
  -4   7   0  216.92    7.04
  -4   7   0  217.20    7.64
  -4   7   0  216.06    8.25
   4   7   0  215.26    7.38
  -4   7   0  205.97    7.56
  -4   7   0  223.87    7.10
  -4  -7   0  219.63    6.95
   4   7   0  212.56    7.33
  -4   7   0  219.72    6.83
  -4   7  -1  129.08    5.29
  -4   7  -1  134.03    5.81
  -4  -7  -1  150.04    5.58
  -4   7  -1  132.79    6.21
  -4   7  -1  136.12    5.88
   4   7   1  134.54    5.47
  -4   7  -1  134.19    5.35
  -4  -7  -1  135.15    5.24
   4   7   1  139.77    5.55
  -4   7  -1  135.93    5.22
  -4   7  -2   21.69    2.35
  -4   7  -2   22.16    2.35
   4   7   2   19.49    2.02
  -4   7  -2   19.65    2.45
   4   7   2   22.88    2.13
  -4   7  -2   23.55    2.25
  -4  -7  -2   23.43    2.22
  -4  -7  -2   21.37    2.07
  -4   7  -2   22.57    2.13
  -4   7  -2   25.55    2.29
  -4   7  -3   31.13    2.76
  -4   7  -3   27.64    2.61
  -4   7  -3   31.95    2.95
   4   7   3   28.90    2.22
  -4  -7  -3   30.99    2.54
   4  -7   3   26.45    2.30
   4   7   3   29.55    2.24
  -4  -7  -3   29.67    2.43
  -4   7  -3   32.81    2.57
  -4   7  -4    5.19    1.28
  -4  -7  -4    1.78    1.02
  -4   7  -4    5.11    1.40
  -4   7  -4    2.24    1.22
  -4   7  -4    6.57    1.45
  -4   7  -4    4.68    1.30
   4  -7   4    2.33    1.07
  -4  -7  -4    2.29    1.16
  -4   7  -4    2.42    1.10
  -4   7  -5  207.46    7.12
  -4   7  -5  219.56    7.88
  -4   7  -5  218.61    7.80
  -4   7  -5  213.59    7.92
  -4   7  -5  210.05    7.13
   4  -7   5  210.71    7.65
  -4  -7  -5  224.28    7.44
  -4  -7  -5  214.99    7.09
  -4   7  -5  218.12    7.38
  -4   7  -6   63.44    3.61
  -4   7  -6   59.11    3.83
  -4   7  -6   55.08    3.85
  -4  -7  -6   59.54    3.64
  -4   7  -6   58.96    3.49
   4  -7   6   56.14    3.90
  -4   7  -6   62.05    3.79
  -4  -7  -6   60.34    3.52
  -4   7  -7  178.86    6.28
  -4   7  -7  164.34    6.76
  -4  -7  -7  164.88    5.37
  -4   7  -7  164.14    6.85
  -4   7  -7  178.52    6.25
   4  -7   7  175.20    7.26
  -4  -7  -7  181.32    6.62
  -4   7  -7  189.34    6.95
  -4  -7  -7  180.08    6.37
  -4  -7  -8  819.12   17.65
  -4   7  -8  792.45   17.16
  -4  -7  -8  800.86   17.80
  -4   7  -8  786.98   18.45
  -4  -7  -8  766.33   16.32
  -4   7  -8  772.31   18.49
  -4   7  -8  794.48   17.10
   4  -7   8  796.78   19.26
  -4   7  -8  803.21   18.26
  -4  -7  -9  269.39    8.09
  -4   7  -9  261.39    8.64
  -4  -7  -9  239.17    7.18
  -4   7  -9  252.59    8.65
  -4   7  -9  254.68    7.42
   4  -7   9  260.02    9.33
  -4   7  -9  258.04    7.49
  -4  -7  -9  269.47    8.18
  -4   7  -9  267.39    8.65
  -4   7 -10  749.39   16.23
  -4  -7 -10  861.17   17.86
  -4   7 -10  770.54   18.10
  -4  -7 -10  803.81   16.82
  -4   7 -10  807.10   18.46
  -4   7 -10  766.87   16.25
   4  -7  10  842.99   19.63
  -4  -7 -10  833.09   17.62
  -4   7 -10  875.50   18.68
  -4  -7 -11  629.07   14.32
  -4  -7 -11  593.25   13.43
  -4   7 -11  608.05   14.79
   4  -7  11  625.49   15.81
  -4   7 -11  640.22   14.93
  -4   7 -12   56.34    3.13
  -4  -7 -12   57.26    3.24
  -4  -7 -12   57.37    2.91
  -4   7 -12   58.55    3.39
   4  -7  12   62.30    3.91
  -4   7 -12   59.03    3.48
  -4   7 -13   15.69    1.49
  -4  -7 -13   21.50    1.65
  -4   7 -13   19.13    1.80
   4  -7  13   18.70    2.08
  -4   7 -13   20.46    1.95
  -4  -7 -14   78.27    2.99
   4   7  14   90.87    4.80
   4  -7  14   89.64    3.97
  -4   7 -14   91.57    3.71
   4  -8 -15   34.77    2.07
   4   8 -15   31.35    1.85
   4  -8 -15   35.73    2.07
   4  -8 -14    1.05    0.73
   4  -8 -14    0.34    0.67
  -4  -8  14   -0.08    0.42
  -4  -8  14    1.34    0.66
   4   8 -14    0.15    0.62
   4  -8 -13   13.57    1.68
   4  -8 -13   13.96    1.62
  -4  -8  13   13.25    1.40
   4   8 -13   13.46    1.45
  -4  -8  13   11.70    1.46
   4   8 -13   14.07    1.54
   4   8 -13   13.81    1.45
   4  -8 -12  637.22   13.99
  -4  -8  12  606.85   13.45
   4   8 -12  591.45   13.63
   4   8 -12  590.80   13.28
   4   8 -12  601.51   13.66
  -4  -8  12  599.05   13.75
   4  -8 -11   47.17    3.03
   4  -8 -11   44.46    3.08
   4   8 -11   42.71    3.00
   4   8 -11   44.21    2.72
  -4  -8  11   44.24    2.86
  -4  -8  11   43.72    2.97
   4   8 -11   47.29    3.13
   4  -8 -10  156.14    5.83
  -4  -8  10  148.79    5.65
   4  -8 -10  143.69    5.94
   4   8 -10  142.97    6.01
  -4  -8  10  143.84    5.69
   4   8 -10  140.73    5.96
   4   8 -10  137.03    5.06
   4  -8  -9  663.02   15.34
  -4  -8   9  648.08   15.32
   4   8  -9  635.33   15.88
  -4  -8   9  658.09   15.23
   4   8  -9  659.87   16.01
   4  -8  -8  714.83   16.09
  -4  -8   8  697.22   16.07
  -4  -8   8  681.72   16.15
  -4   8   7  494.06   11.40
  -4   8   7  499.62   11.40
  -4  -8   7  504.50   12.69
  -4  -8   7  496.08   12.65
  -4   8   6  144.89    5.25
  -4  -8   6  143.78    5.85
   4  -8  -6  145.54    6.42
   4   8  -6  146.50    6.50
  -4   8   6  146.93    5.25
  -4  -8   6  148.98    5.84
   4   8  -6  152.44    6.62
  -4   8   5    2.20    0.92
   4  -8  -5    2.95    1.35
   4   8  -5    2.19    1.56
  -4   8   5    1.75    0.87
  -4  -8   5    2.97    1.26
  -4  -8   5    1.61    1.01
   4   8  -5    2.50    1.64
  -4   8   4   99.97    4.45
   4  -8  -4  100.04    5.36
  -4  -8   4   94.69    4.53
   4   8  -4   94.25    5.12
  -4   8   4   99.72    4.42
  -4  -8   4   93.46    4.59
   4   8  -4   96.22    5.15
  -4   8   3 1630.16   31.26
   4  -8  -3 1647.71   33.31
   4   8  -3 1633.54   32.61
  -4   8   3 1625.77   31.26
  -4  -8   3 1607.66   31.34
   4   8  -3 1632.61   32.59
  -4   8   2  869.23   18.31
   4   8  -2  818.91   18.97
  -4   8   2  859.80   18.23
  -4  -8   2  833.68   18.11
   4   8  -2  819.79   18.97
  -4   8   2  796.69   17.25
  -4   8   1    1.30    1.03
   4   8  -1    2.94    1.36
  -4   8   1    2.02    1.07
  -4   8   1    0.94    0.81
   4   8  -1    2.48    1.30
  -4  -8   1    1.90    1.03
  -4   8   0  875.20   18.99
  -4   8   0  849.38   21.13
   4   8   0  858.18   19.17
  -4   8   0  897.88   19.06
  -4  -8   0  898.13   19.29
  -4  -8   0  871.12   18.65
   4   8   0  859.54   19.17
  -4   8   0  843.35   18.23
  -4   8  -1  331.78    9.68
  -4  -8  -1  335.94    9.76
  -4   8  -1  347.45   11.27
  -4   8  -1  333.83   10.50
   4   8   1  326.60    9.48
  -4   8  -1  340.52    9.73
  -4  -8  -1  320.36    9.25
   4   8   1  340.29    9.61
  -4   8  -1  335.91    9.27
  -4   8  -2 2150.04   39.29
  -4   8  -2 2098.78   40.34
  -4   8  -2 2039.11   41.22
  -4   8  -2 2037.83   40.25
   4   8   2 2062.38   38.36
  -4   8  -2 2153.65   39.25
  -4  -8  -2 2150.83   39.35
   4   8   2 2021.11   38.25
  -4  -8  -2 2029.89   38.55
  -4   8  -2 2050.67   38.62
  -4   8  -3  408.06   11.87
  -4   8  -3  411.49   11.98
  -4   8  -3  411.05   12.52
   4  -8   3  394.61   10.36
  -4  -8  -3  426.82   11.30
  -4  -8  -3  413.10   10.74
  -4   8  -3  392.90   10.75
  -4   8  -4  101.79    5.28
  -4   8  -4   96.75    5.16
  -4   8  -4   98.00    5.42
   4  -8   4   93.85    4.48
  -4  -8  -4  100.15    4.81
  -4  -8  -4   92.15    4.41
  -4   8  -4   99.70    4.68
  -4   8  -5  322.61    9.48
  -4  -8  -5  323.19    9.62
  -4   8  -5  323.11   10.22
  -4   8  -5  321.31   10.20
  -4   8  -5  311.05   10.35
  -4   8  -5  334.21    9.55
  -4  -8  -5  332.79    9.27
   4  -8   5  308.88    9.44
  -4   8  -5  298.70    9.23
  -4   8  -6  199.38    6.96
   4  -8   6  195.57    7.25
  -4  -8  -6  206.15    7.20
  -4   8  -6  197.11    7.56
  -4   8  -6  184.06    7.37
  -4   8  -6  195.01    7.75
  -4   8  -6  196.58    6.90
  -4   8  -6  190.76    6.98
  -4  -8  -6  206.07    6.87
  -4  -8  -7 2637.69   47.06
  -4   8  -7 2606.03   47.01
  -4   8  -7 2612.42   48.48
  -4   8  -7 2485.00   48.25
  -4   8  -7 2547.80   48.62
  -4   8  -7 2574.09   46.94
   4  -8   7 2601.41   48.27
  -4  -8  -7 2679.58   47.53
  -4   8  -7 2481.82   47.38
  -4   8  -8   76.00    3.82
  -4  -8  -8   71.84    3.83
  -4   8  -8   74.76    4.34
  -4   8  -8   70.33    4.21
  -4   8  -8   76.58    4.49
  -4   8  -8   73.42    3.74
   4  -8   8   74.69    4.41
  -4  -8  -8   71.92    3.91
  -4   8  -8   77.22    4.20
  -4   8  -9    1.39    0.86
  -4   8  -9    0.55    0.96
  -4  -8  -9    1.18    1.03
  -4   8  -9    0.85    0.98
  -4   8  -9    1.44    0.85
   4  -8   9    0.29    1.02
  -4  -8  -9    0.81    0.87
  -4   8  -9    2.12    1.14
  -4   8 -10   12.42    1.34
  -4  -8 -10   16.70    1.90
  -4   8 -10   13.79    1.83
  -4  -8 -10   13.70    1.32
  -4   8 -10   12.21    1.76
  -4   8 -10   13.67    1.41
   4  -8  10   13.70    1.97
  -4   8 -10   14.89    1.93
  -4   8 -11  377.03    9.76
  -4  -8 -11  399.07    9.75
  -4   8 -11  379.78    9.93
  -4   8 -11  371.62    9.89
   4  -8  11  383.21   10.39
  -4   8 -12   58.82    2.95
  -4  -8 -12   60.73    3.09
   4  -8  12   64.06    3.46
  -4   8 -12   54.16    2.95
  -4   8 -12   60.96    3.23
   4  -8  13  141.28    4.95
  -4   8 -13  147.70    4.89
   4  -9 -14   70.93    2.89
   4  -9 -14   74.99    3.02
   4  -9 -13   36.95    2.27
   4  -9 -13   39.29    2.34
  -4  -9  13   36.87    2.00
   4   9 -13   34.30    1.94
   4   9 -13   34.50    1.93
   4  -9 -12  256.02    7.15
   4   9 -12  240.77    6.83
  -4  -9  12  243.80    6.49
  -4  -9  12  245.12    6.74
   4   9 -12  242.94    6.83
   4  -9 -11  458.33   10.90
   4   9 -11  448.57   10.94
  -4  -9  11  425.96   10.52
  -4  -9  11  420.61   10.24
   4   9 -11  431.64   10.79
   4  -9 -10  279.65    8.04
   4   9 -10  261.59    8.12
  -4  -9  10  272.15    7.66
  -4  -9  10  261.54    7.82
   4   9 -10  259.56    8.10
   4  -9  -9    1.97    1.10
  -4  -9   9    3.22    1.09
   4   9  -9    3.71    1.33
   4  -9  -9    3.21    1.17
  -4  -9   9    3.46    1.09
   4   9  -9    3.87    1.38
   4  -9  -8  945.92   19.71
   4  -9  -8  877.85   20.20
  -4  -9   8  914.95   19.31
  -4  -9   8  918.39   19.68
  -4  -9   7  696.90   15.70
   4   9  -7  686.95   16.84
  -4  -9   7  684.12   15.98
   4   9  -7  696.47   16.84
  -4   9   6  334.06    8.80
   4   9  -6  335.84   10.43
  -4   9   6  331.81    8.76
  -4  -9   6  334.36    9.77
   4   9  -6  327.51   10.30
  -4  -9   6  337.76    9.46
  -4   9   5 2754.80   49.50
   4  -9  -5 2681.74   51.82
   4   9  -5 2802.83   51.57
  -4   9   5 2768.47   49.46
  -4  -9   5 2752.39   50.54
  -4  -9   5 2813.95   49.99
   4   9  -5 2785.73   51.50
  -4   9   4  376.74   10.15
   4  -9  -4  390.67   11.85
   4   9  -4  375.73   11.26
  -4   9   4  381.75   10.16
  -4  -9   4  385.97   10.33
   4   9  -4  371.59   11.20
  -4   9   3  276.92    8.38
  -4  -9   3  269.23    8.25
   4  -9  -3  285.09    9.85
   4   9  -3  278.22    9.14
  -4   9   3  271.32    8.29
   4   9  -3  282.62    9.19
  -4   9   2  539.10   13.29
  -4  -9   2  534.59   13.61
  -4  -9   2  529.86   13.05
   4   9  -2  525.73   13.79
  -4   9   2  546.18   13.28
   4   9  -2  526.26   13.77
  -4   9   1  161.12    6.21
  -4   9   1  167.96    7.20
  -4  -9   1  158.85    6.35
   4   9  -1  157.64    6.37
  -4   9   1  156.25    7.01
  -4   9   1  162.79    6.21
  -4  -9   1  157.77    5.94
   4   9  -1  151.84    6.27
  -4   9   0 1626.71   31.21
   4   9   0 1531.48   30.84
  -4   9   0 1607.69   31.10
  -4  -9   0 1609.72   31.29
  -4  -9   0 1563.43   30.43
   4   9   0 1545.67   30.81
  -4   9   0 1572.28   29.81
  -4   9  -1   68.53    3.99
   4   9   1   57.26    3.45
  -4   9  -1   62.77    3.84
  -4  -9  -1   62.45    3.83
   4   9   1   60.35    3.51
  -4  -9  -1   59.81    3.53
  -4   9  -1   54.73    3.22
  -4   9  -2 2427.36   42.93
  -4   9  -2 2216.77   44.94
  -4   9  -2 2315.32   44.12
   4   9   2 2132.94   41.12
  -4   9  -2 2413.97   42.86
  -4  -9  -2 2374.51   42.88
   4   9   2 2174.36   41.18
  -4  -9  -2 2331.74   42.03
  -4   9  -2 2213.73   41.53
  -4   9  -3   10.98    1.61
  -4   9  -3   16.80    2.19
  -4   9  -3   14.72    2.32
  -4   9  -3    9.78    2.02
  -4   9  -3   16.20    2.18
  -4   9  -3   12.61    2.05
  -4  -9  -3   14.64    2.03
  -4  -9  -3   18.70    2.03
  -4   9  -4   76.32    4.65
  -4   9  -4   79.31    4.74
  -4   9  -4   73.93    4.83
  -4  -9  -4   78.73    3.97
   4  -9   4   68.99    3.62
  -4  -9  -4   78.25    4.22
  -4   9  -4   67.27    3.74
  -4   9  -5 1199.08   24.43
   4  -9   5 1134.79   23.65
  -4   9  -5 1183.35   25.48
  -4   9  -5 1133.84   25.40
  -4   9  -5 1144.01   25.88
  -4   9  -5 1199.92   24.40
  -4  -9  -5 1226.13   24.64
  -4   9  -5 1169.28   23.97
  -4  -9  -5 1217.11   23.91
  -4  -9  -6 1210.55   24.21
  -4   9  -6 1232.89   24.65
  -4   9  -6 1228.06   25.82
  -4   9  -6 1157.09   25.69
  -4   9  -6 1215.09   26.25
  -4   9  -6 1198.94   24.49
   4  -9   6 1200.84   24.42
  -4  -9  -6 1248.19   24.82
  -4   9  -6 1186.54   24.44
  -4   9  -7 1306.77   25.59
  -4   9  -7 1302.66   26.84
   4  -9   7 1265.68   25.77
  -4   9  -7 1238.86   26.90
  -4   9  -7 1320.19   25.56
  -4  -9  -7 1303.89   25.41
  -4   9  -7 1246.58   25.61
  -4  -9  -7 1299.59   25.77
  -4   9  -8  671.53   14.74
  -4  -9  -8  689.20   14.97
  -4   9  -8  666.03   15.92
   4  -9   8  629.05   15.11
  -4   9  -8  653.29   15.95
  -4   9  -8  671.26   14.68
  -4  -9  -8  671.71   14.99
  -4   9  -8  660.43   15.15
  -4   9  -9  150.89    5.17
  -4  -9  -9  159.29    5.53
  -4   9  -9  170.66    6.24
  -4   9  -9  163.04    6.18
  -4   9  -9  167.75    5.32
   4  -9   9  155.94    5.78
  -4  -9  -9  160.99    5.51
  -4   9  -9  158.50    5.74
  -4   9 -10  182.97    5.27
  -4  -9 -10  209.12    6.24
  -4   9 -10  214.97    6.72
   4  -9  10  207.52    6.49
  -4   9 -10  206.85    6.59
  -4   9 -10  180.16    5.24
  -4   9 -10  211.79    6.50
  -4   9 -11   26.75    2.03
  -4  -9 -11   28.92    2.04
   4  -9  11   25.13    1.99
  -4   9 -11   24.79    1.97
  -4   9 -12    3.43    0.89
   4  -9  12    3.88    0.86
  -4 -10  12   68.85    2.78
   4 -10 -12   77.37    3.09
   4 -10 -12   76.80    3.12
   4  10 -12   72.41    2.87
   4  10 -12   71.04    2.84
   4  10 -11  642.59   13.90
  -4 -10  11  671.14   13.81
   4  10 -11  643.67   13.87
   4  10 -10 1198.21   23.56
  -4 -10  10 1215.64   23.30
   4  10 -10 1204.69   23.56
   4  10  -9  450.70   11.38
  -4 -10   9  451.52   10.22
   4  10  -9  437.26   11.26
  -4 -10   8    9.33    1.51
  -4 -10   8    8.61    1.21
   4  10  -7    5.17    1.47
  -4 -10   7    5.48    1.31
   4  10  -7    4.37    1.39
  -4 -10   7    4.97    1.08
   4 -10  -6 2352.35   42.63
   4  10  -6 2316.63   43.65
  -4 -10   6 2352.76   43.10
  -4 -10   6 2319.02   41.97
   4  10  -6 2330.68   43.63
  -4  10   5  175.44    5.85
   4  10  -5  189.54    7.02
  -4  10   5  180.49    5.88
  -4 -10   5  177.92    5.98
   4  10  -5  180.02    6.88
  -4  10   4 1524.71   29.32
   4  10  -4 1551.00   30.64
  -4  10   4 1529.02   29.27
  -4 -10   4 1537.34   29.22
   4  10  -4 1530.89   30.56
  -4  10   3  471.61   11.72
   4 -10  -3  456.23   13.26
  -4 -10   3  466.37   12.23
   4  10  -3  453.40   12.30
  -4  10   3  484.86   11.78
   4  10  -3  448.83   12.24
  -4 -10   3  463.49   11.41
  -4 -10   2   75.90    4.18
  -4  10   2   71.16    3.89
   4 -10  -2   72.35    4.63
   4  10  -2   73.02    4.11
  -4  10   2   73.81    3.94
  -4 -10   2   73.07    3.70
   4  10  -2   76.88    4.19
  -4  10   1   27.98    2.52
   4  10  -1   27.16    2.53
  -4  10   1   27.98    2.48
  -4 -10   1   28.08    2.57
  -4 -10   1   25.18    2.21
   4  10  -1   25.56    2.43
   4  10   0    2.20    1.01
  -4 -10   0    2.19    0.99
  -4 -10   0    1.73    1.19
  -4  10   0    0.85    1.11
  -4  10   0    0.23    0.93
   4  10   0    1.99    1.08
  -4  10   0    4.36    1.30
  -4  10  -1  105.16    4.90
   4  10   1   99.23    4.37
  -4  10  -1  107.84    4.93
  -4 -10  -1  107.08    5.00
   4  10   1   99.05    4.36
  -4 -10  -1  108.30    4.53
  -4  10  -2   33.47    2.79
  -4  10  -2   33.48    2.76
  -4 -10  -2   30.97    2.67
  -4 -10  -2   29.43    2.38
  -4  10  -3  109.47    5.01
  -4  10  -3  100.40    5.40
  -4  10  -3  111.55    5.02
  -4 -10  -3  111.77    4.99
  -4 -10  -3  112.00    4.62
  -4  10  -3  104.77    4.31
  -4 -10  -4  168.31    6.16
  -4  10  -4  149.84    5.37
  -4 -10  -4  156.00    5.60
  -4 -10  -5  356.16    9.37
  -4  10  -5  346.71    9.75
  -4  10  -5  359.90   10.67
  -4  10  -5  364.20    9.90
  -4 -10  -5  364.46    9.87
  -4  10  -5  351.96    9.25
  -4  10  -6  425.97   10.71
  -4 -10  -6  417.51   10.23
  -4  10  -6  424.05   11.59
  -4  10  -6  427.07   10.69
   4 -10   6  382.91    9.71
  -4 -10  -6  414.70   10.57
  -4  10  -6  400.44   10.12
  -4  10  -7  365.09    9.22
  -4 -10  -7  357.52    8.95
  -4  10  -7  345.49    9.98
  -4  10  -7  361.03    9.14
  -4 -10  -7  344.33    9.09
  -4  10  -7  346.34    8.95
  -4  10  -8   41.14    2.46
  -4 -10  -8   40.95    2.45
  -4  10  -8   44.86    2.98
  -4  10  -8   41.12    2.46
   4 -10   8   37.17    2.32
  -4 -10  -8   41.27    2.46
  -4  10  -8   41.60    2.50
  -4  10  -9  204.51    5.68
  -4 -10  -9  221.40    6.08
  -4  10  -9  223.73    6.76
  -4  10  -9  199.95    5.63
   4 -10   9  207.54    5.88
  -4  10  -9  220.46    6.15
  -4  10 -10   89.18    3.60
  -4 -10 -10   86.33    3.28
  -4  10 -10   87.55    3.32
   4  11 -10    0.50    0.66
   4 -11 -10    0.09    0.55
   4  11 -10    0.87    0.65
  -4 -11  10    0.51    0.52
   4 -11  -9    8.19    1.15
  -4 -11   9    6.66    1.06
   4  11  -8    2.97    1.01
   4 -11  -8    2.10    0.80
   4  11  -8    1.56    0.94
  -4 -11   8    1.73    0.82
   4 -11  -7  428.59   10.31
   4  11  -7  439.62   10.90
  -4 -11   7  429.00   10.52
   4  11  -7  439.46   10.87
   4  11  -6   -0.07    0.94
   4 -11  -6    0.49    0.79
   4  11  -6    0.36    0.91
  -4  11   5  240.13    6.54
   4 -11  -5  254.94    7.33
   4  11  -5  256.19    7.79
  -4  11   5  240.93    6.51
   4  11  -5  260.05    7.81
  -4  11   4   60.56    3.05
   4 -11  -4   61.53    3.24
   4  11  -4   64.42    3.60
  -4  11   4   60.38    3.03
  -4 -11   4   64.34    3.56
  -4 -11   4   60.46    2.84
   4  11  -4   63.92    3.59
  -4  11   3  226.02    6.76
   4  11  -3  216.48    7.10
  -4  11   3  223.14    6.70
  -4 -11   3  217.31    7.15
  -4 -11   3  220.49    6.24
   4  11  -3  225.56    7.17
   4  11  -2    1.79    0.97
  -4 -11   2    1.24    0.73
  -4  11   2    0.55    0.80
   4  11  -2    1.08    0.87
  -4  11   2    1.56    0.92
  -4 -11   2    1.38    0.98
  -4  11   1   34.48    2.60
   4  11  -1   35.55    2.52
  -4  11   1   36.83    2.63
  -4 -11   1   38.49    2.81
   4  11  -1   31.86    2.41
  -4 -11   1   33.61    2.21
  -4  11   0  270.06    8.06
  -4 -11   0  273.03    8.30
   4  11   0  265.27    7.58
  -4  11   0  283.87    8.17
   4  11   0  267.43    7.57
  -4 -11   0  280.60    7.44
   4  11   1    0.42    0.60
  -4  11  -1    0.67    0.93
  -4 -11  -1    1.17    0.75
   4  11   1   -0.21    0.66
  -4  11  -1    0.44    0.93
  -4 -11  -1    2.10    1.01
  -4  11  -2   31.22    2.49
  -4 -11  -2   32.00    2.49
  -4  11  -2   30.90    2.46
  -4 -11  -2   29.69    2.08
  -4 -11  -3   49.56    3.02
  -4 -11  -3   43.60    2.49
  -4  11  -3   43.59    2.90
  -4  11  -3   45.91    2.96
  -4 -11  -4  221.76    6.24
  -4 -11  -4  219.02    6.83
  -4 -11  -5 1068.50   20.13
  -4 -11  -5 1072.52   20.81
  -4  11  -6  394.71    9.52
  -4 -11  -6  380.38    8.85
  -4  11  -6  386.79   10.26
  -4 -11  -6  378.31    9.22
  -4  11  -6  389.71    9.43
  -4  11  -7  315.53    7.70
  -4 -11  -7  298.75    7.23
  -4  11  -7  302.72    8.36
  -4  11  -7  299.05    7.59
  -4 -11  -7  293.76    7.34
  -4  11  -8   27.05    1.69
  -4  11  -8   30.30    2.14
  -4 -11  -8   26.21    1.61
  -4  11  -8   24.64    1.65
   4 -12  -7  152.98    4.47
   4  12  -7  159.06    4.89
  -4 -12   7  151.66    4.71
   4  12  -7  168.12    4.98
   4 -12  -6   59.77    2.62
   4  12  -6   59.55    2.90
   4  12  -6   59.45    2.86
   4  12  -5    3.46    0.92
   4 -12  -5    4.07    0.82
   4  12  -5    3.90    0.95
  -4 -12   5    4.24    0.97
   4 -12  -4  255.08    6.64
  -4 -12   4  261.56    7.19
   4  12  -4  251.55    7.00
   4  12  -4  258.57    7.05
  -4  12   3  106.04    3.73
   4 -12  -3  111.58    3.89
   4  12  -3  111.03    4.14
  -4  12   3  106.66    3.73
  -4 -12   3  110.76    4.34
   4  12  -3  110.43    4.14
  -4  12   2   17.35    1.56
   4 -12  -2   19.13    1.53
   4  12  -2   16.70    1.56
  -4  12   2   16.29    1.50
  -4 -12   2   18.43    1.74
   4  12  -2   16.58    1.55
  -4  12   1  192.91    5.80
   4 -12  -1  189.34    5.39
   4  12  -1  183.85    5.38
  -4  12   1  194.35    5.77
  -4 -12   1  197.83    6.04
   4  12  -1  182.65    5.40
  -4  12   0  179.84    5.63
   4 -12   0  174.39    5.04
  -4  12   0  174.99    5.54
  -4 -12   0  186.91    5.83
  -4  12  -1  164.52    5.39
  -4  12  -1  162.62    5.33
  -4 -12  -1  174.02    5.52
  -4  12  -2   23.58    1.91
  -4  12  -2   23.19    1.87
  -4 -12  -2   23.03    1.83
  -4  12  -3   10.20    1.31
  -4 -12  -3    9.01    1.18
  -4  12  -3    9.15    1.23
  -4  12  -4   41.05    2.38
  -4  12  -4   42.51    2.38
  -4 -12  -4   39.75    2.19
  -4 -12  -5  108.92    3.60
  -5   0  19    0.39    0.61
  -5   0  18    0.98    0.81
   5   0 -18    1.85    0.81
   5   0 -17   -0.24    0.86
  -5   0  17    0.08    0.93
   5   0 -17    0.65    0.85
   5   0 -16  261.45    8.47
  -5   0  16  265.58    8.57
   5   0 -16  249.30    7.81
   5   0 -15    0.09    1.15
  -5   0  15    2.97    1.33
   5   0 -15    1.96    1.15
   5   0 -15    0.84    0.92
   5   0 -14  635.41   15.44
  -5   0  14  620.21   15.71
   5   0 -14  600.26   15.21
   5   0 -14  627.83   14.89
   5   0 -13    0.56    1.08
  -5   0  13    1.52    1.17
   5   0 -13    0.09    1.28
   5   0 -13    0.09    0.89
   5   0 -12 2505.47   46.24
  -5   0  12 2494.46   46.97
   5   0 -12 2507.30   46.12
   5   0 -11    1.61    1.08
  -5   0  11    0.64    0.96
   5   0 -11    0.86    0.87
   5   0 -10   54.16    3.21
  -5   0  10   54.25    3.00
  -5   0  10   57.43    3.51
   5   0 -10   52.73    3.11
  -5   0  10   53.47    2.98
   5   0  -9    0.20    0.68
  -5   0   9    2.57    0.88
  -5   0   9    3.73    1.10
  -5   0   9    2.12    0.82
   5   0  -9    0.89    0.75
  -5   0   8  336.32   10.41
   5   0  -8  354.66    9.02
  -5   0   8  359.97    9.01
   5   0  -8  355.51    8.91
  -5   0   8  358.36    9.44
  -5   0   8  362.24    8.99
  -5   0   7    0.17    0.93
   5   0  -7    1.08    0.67
  -5   0   7    1.03    0.81
  -5   0   7    1.00    0.71
   5   0  -7    1.40    0.69
  -5   0   7    0.91    0.72
  -5   0   7    0.33    0.64
  -5   0   6 5259.39   90.07
  -5   0   6 5386.51   88.62
   5   0  -6 5241.91   87.94
  -5   0   6 5270.84   88.71
  -5   0   6 5199.04   88.58
  -5   0   6 5049.83   90.04
  -5   0   5    0.07    0.71
  -5   0   5    0.31    0.66
   5   0  -5    0.42    0.55
  -5   0   5    2.52    0.80
  -5   0   5    0.20    0.66
  -5   0   4 4848.62   82.76
   5   0  -4 4851.68   82.32
   5   0  -4 4949.24   81.55
  -5   0   4 4931.41   82.26
  -5   0   4 4867.39   82.65
  -5   0   4 4884.45   83.51
  -5   0   3    1.26    0.72
  -5   0   3    0.44    0.70
   5   0  -3   -0.20    0.47
  -5   0   3    1.95    0.73
   5   0  -3    0.34    0.39
  -5   0   3    1.18    0.63
  -5   0   3    0.16    0.51
  -5   0   2  434.99    9.88
   5   0  -2  436.66    9.22
   5   0  -2  451.35    8.66
  -5   0   2  444.62    9.32
  -5   0   2  434.06    9.88
  -5   0   2  445.07   10.13
   5   0  -1    1.06    0.43
  -5   0   1    0.54    0.63
   5   0  -1    0.12    0.35
   5   0  -1    0.74    0.32
  -5   0   0  596.03   12.53
   5   0   0  608.31   11.25
  -5   0   0  598.05   12.18
  -5   0   0  591.51   12.56
   5   0   0  614.62   11.35
  -5   0   0  637.28   12.86
  -5   0  -1    0.71    0.59
  -5   0  -1    0.70    0.57
  -5   0  -1    1.19    0.61
  -5   0  -1    0.66    0.55
   5   0   1    0.59    0.23
  -5   0  -1    0.53    0.47
  -5   0  -2 6648.17  110.96
  -5   0  -2 6719.28  111.08
  -5   0  -2 6700.30  111.00
  -5   0  -2 6495.61  110.55
  -5   0  -2 6548.83  110.06
  -5   0  -3    0.49    0.61
  -5   0  -3    0.55    0.46
  -5   0  -3    1.92    0.64
  -5   0  -3    0.83    0.62
  -5   0  -3    1.97    0.67
  -5   0  -4 3419.60   57.89
  -5   0  -4 3406.94   58.76
  -5   0  -4 3442.72   57.88
  -5   0  -4 3465.68   57.38
  -5   0  -5    0.95    0.70
  -5   0  -5    0.12    0.42
  -5   0  -5    1.19    0.51
  -5   0  -5   -0.04    0.46
  -5   0  -5   -0.06    0.64
  -5   0  -6   57.96    2.53
  -5   0  -6   65.78    3.36
  -5   0  -6   59.18    2.97
  -5   0  -7    1.40    0.76
  -5   0  -7    0.98    0.55
  -5   0  -7    0.36    0.76
  -5   0  -8  223.15    6.16
  -5   0  -8  226.11    7.33
  -5   0  -8  218.89    6.60
  -5   0  -9    0.33    0.61
  -5   0  -9    0.85    0.94
  -5   0  -9    0.19    0.70
  -5   0 -10  308.80    9.46
  -5   0 -10  327.32    9.57
  -5   0 -10  304.73    8.30
  -5   0 -11    0.18    0.70
  -5   0 -11    0.91    1.08
  -5   0 -12  111.59    5.20
  -5   0 -13   -0.09    0.98
  -5   0 -14  273.24    8.47
  -5   0 -14  274.56    8.42
  -5   0 -15    0.22    0.79
  -5   0 -15    0.21    0.78
  -5   0 -16  575.22   12.85
  -5   0 -16  577.03   12.64
  -5   1  19    4.75    0.91
   5   1 -19    4.28    0.80
   5  -1 -18   16.24    1.77
  -5   1  18   15.21    1.65
   5  -1 -18   14.00    1.35
   5   1 -18   17.57    1.64
   5  -1 -17   24.99    2.34
  -5   1  17   23.84    2.24
   5  -1 -17   25.20    2.01
   5   1 -17   24.96    2.16
   5  -1 -16  164.88    6.41
   5   1 -16  164.85    6.43
  -5   1  16  152.95    6.25
   5  -1 -16  161.33    5.79
   5   1 -16  168.12    6.12
   5  -1 -15   34.10    2.93
   5   1 -15   32.00    2.92
   5   1 -15   30.19    2.74
  -5   1  15   32.60    2.90
   5  -1 -15   32.12    2.79
   5  -1 -15   32.00    2.63
   5  -1 -14  209.32    7.58
   5   1 -14  211.54    7.59
  -5   1  14  209.57    7.75
   5  -1 -14  204.61    7.43
   5  -1 -14  203.20    7.04
   5   1 -14  201.98    7.48
[truncated: 242,634 more chars]
