# Supplementary material for: Structural (XRD) Characterization and an Analysis of H-Bonding Motifs in Some Tetrahydroxidohexaoxidopentaborate(1-) Salts of N-Substituted Guanidinium Cations
Source: Molecules. 2023 Apr 6;28(7):3273. doi: 10.3390/molecules28073273 (PMC10096507; doi:10.3390/molecules28073273)
Supplement: Supplementary file 1 [file molecules-28-03273-s001.zip › MAB6.cif]

data_MAB6

#2019ncs0282_2b

_audit_creation_date               2023-03-16
_audit_creation_method
;
Olex2 1.5
(compiled 2023.03.06 svn.rbb2c1857 for OlexSys, GUI svn.r6748)
;
_shelx_SHELXL_version_number       '2018/3'
loop_
  _audit_author_name
  _audit_author_email
  _audit_author_address
 'Beckett, M.A.' ''
;
Bangor University
School of Chemistry
Bangor
LL57 2UW
UK
;
 'Horton, P.N.' pnh@soton.ac.uk
;
University of Southampton
Chemistry
Southampton
SO17 1BJ
UK
;

_audit_contact_author_address      ?
_audit_contact_author_email        ?
_audit_contact_author_name         ''
_audit_contact_author_phone        ?
_publ_contact_author_id_orcid      ?
_publ_section_references
;
Dolomanov, O.V., Bourhis, L.J., Gildea, R.J, Howard, J.A.K. & Puschmann, H.
 (2009), J. Appl. Cryst. 42, 339-341.

Sheldrick, G.M. (2015). Acta Cryst. C71, 3-8.
;
_chemical_name_common              ?
_chemical_name_systematic          ?
_chemical_formula_moiety           'B5 H4 O10, C7 H14 N3'
_chemical_formula_sum              'C7 H18 B5 N3 O10'
_chemical_formula_weight           358.29
_chemical_melting_point            ?
_chemical_oxdiff_formula           'C7 H20 N3 B5 O10'
_chemical_oxdiff_usercomment       MAB/TR/TABCDEB5
loop_
  _atom_type_symbol
  _atom_type_description
  _atom_type_scat_dispersion_real
  _atom_type_scat_dispersion_imag
  _atom_type_scat_source
 'C' 'C' 0.0181 0.0091 'International Tables Vol C Tables 4.2.6.8 and 6.1.1.4'
 'H' 'H' 0.0000 0.0000 'International Tables Vol C Tables 4.2.6.8 and 6.1.1.4'
 'B' 'B' 0.0090 0.0039 'International Tables Vol C Tables 4.2.6.8 and 6.1.1.4'
 'N' 'N' 0.0311 0.0180 'International Tables Vol C Tables 4.2.6.8 and 6.1.1.4'
 'O' 'O' 0.0492 0.0322 'International Tables Vol C Tables 4.2.6.8 and 6.1.1.4'

_shelx_space_group_comment
;
The symmetry employed for this shelxl refinement is uniquely defined
by the following loop, which should always be used as a source of
symmetry information in preference to the above space-group names.
They are only intended as comments.
;
_space_group_crystal_system        'triclinic'
_space_group_IT_number             2
_space_group_name_H-M_alt          'P -1'
_space_group_name_Hall             '-P 1'
loop_
  _space_group_symop_operation_xyz
 'x, y, z'
 '-x, -y, -z'

_cell_length_a                     9.3096(6)
_cell_length_b                     9.3175(3)
_cell_length_c                     9.3733(6)
_cell_angle_alpha                  76.598(5)
_cell_angle_beta                   85.611(5)
_cell_angle_gamma                  79.947(4)
_cell_volume                       778.22(8)
_cell_formula_units_Z              2
_cell_measurement_reflns_used      6687
_cell_measurement_temperature      99.9(7)
_cell_measurement_theta_max        70.0890
_cell_measurement_theta_min        4.9090
_shelx_estimated_absorpt_T_max     0.978
_shelx_estimated_absorpt_T_min     0.797
_exptl_absorpt_coefficient_mu      1.133
_exptl_absorpt_correction_T_max    1.00000
_exptl_absorpt_correction_T_min    0.80292
_exptl_absorpt_correction_type     multi-scan
_exptl_absorpt_process_details
;
CrysAlisPro 1.171.40.45a (Rigaku Oxford Diffraction, 2019)
Empirical absorption correction using spherical harmonics,
 implemented in SCALE3 ABSPACK scaling algorithm.
;
_exptl_absorpt_special_details     ?
_exptl_crystal_colour              colourless
_exptl_crystal_colour_primary      colourless
_exptl_crystal_density_diffrn      1.529
_exptl_crystal_density_meas        ?
_exptl_crystal_density_method      ?
_exptl_crystal_description         plate
_exptl_crystal_F_000               372
_exptl_crystal_recrystallization_method  'The material was crystallised'
_exptl_crystal_size_max            0.21
_exptl_crystal_size_mid            0.11
_exptl_crystal_size_min            0.02
_exptl_transmission_factor_max     ?
_exptl_transmission_factor_min     ?
_diffrn_reflns_av_R_equivalents    0.0443
_diffrn_reflns_av_unetI/netI       0.0301
_diffrn_reflns_Laue_measured_fraction_full  0.993
_diffrn_reflns_Laue_measured_fraction_max  0.992
_diffrn_reflns_limit_h_max         11
_diffrn_reflns_limit_h_min         -11
_diffrn_reflns_limit_k_max         11
_diffrn_reflns_limit_k_min         -11
_diffrn_reflns_limit_l_max         11
_diffrn_reflns_limit_l_min         -11
_diffrn_reflns_number              13382
_diffrn_reflns_point_group_measured_fraction_full  0.993
_diffrn_reflns_point_group_measured_fraction_max  0.992
_diffrn_reflns_theta_full          67.679
_diffrn_reflns_theta_max           68.221
_diffrn_reflns_theta_min           4.828
_diffrn_ambient_environment        N~2~
_diffrn_ambient_temperature        99.9(7)
_diffrn_detector                   'hybrid pixel array detector'
_diffrn_detector_area_resol_mean   10
_diffrn_detector_dtime             0.000
_diffrn_detector_type              'Rigaku, HyPix 6000HE'
_diffrn_measured_fraction_theta_full  0.993
_diffrn_measured_fraction_theta_max  0.992
_diffrn_measurement_details
;
List of Runs (angles in degrees, time in seconds):

  # Type    Start    End  Width  t~exp~   \w     \q     \k     \f   Frames
--------------------------------------------------------------------------
  1  \w    -84.00  94.00   0.50    0.50    --    5.00  10.00-150.00  356
  2  \w    -84.00  94.00   0.50    0.50    --    5.00  30.00  90.00  356
  3  \w   -179.00  -1.00   0.50    1.20    --  -90.00  58.00 -89.24  356
  4  \w   -179.00  -1.00   0.50    1.20    --  -90.00  59.00 178.56  356
  5  \w   -179.00  -1.00   0.50    1.20    --  -90.00  58.00  -0.54  356
  6  \w   -179.00  -1.00   0.50    1.20    --  -90.00  59.00 135.76  356
  7  \w   -179.00  -1.00   0.50    1.20    --  -90.00  57.00 104.06  356
  8  \w   -179.00  -1.00   0.50    1.20    --  -90.00  39.00 -90.00  356
  9  \w   -179.00  -1.00   0.50    1.20    --  -90.00  57.00  53.21  356
 10  \w   -179.00 -13.00   0.50    1.20    --  -90.00  10.00-150.00  332
 11  \w   -179.00-132.00   0.50    1.20    --  -90.00  59.00 178.56   94
 12  \w   -175.00-136.00   0.50    1.20    --  -90.00  59.00-142.44   78
 13  \w    -84.00 -58.00   0.50    1.20    --  -90.00  59.00-142.44   52
 14  \w   -164.00-107.00   0.50    1.20    --  -90.00  58.00 -46.68  114
 15  \w    -53.00 -27.00   0.50    1.20    --  -90.00  58.00 -46.68   52
 16  \w   -177.00 -45.00   0.50    1.20    --  -90.00  59.00  15.60  264
 17  \w   -179.00  -1.00   0.50    1.20    --  -90.00  20.00  90.00  356
;
_diffrn_measurement_device         'four-circle diffractometer'
_diffrn_measurement_device_details  'Rigaku, AFC11 quarter \c goniometer'
_diffrn_measurement_device_type
;
Rigaku 007HF equipped with HF Varimax confocal mirrors and an AFC11 goniometer and HyPix 6000HE detector
;
_diffrn_measurement_method         'profile data from \w-scans'
_diffrn_measurement_specimen_support  'MiTeGen loops'
_diffrn_orient_matrix_type        
 'CrysAlisPro convention (1999,Acta A55,543-557)'
_diffrn_orient_matrix_UB_11        -0.0144231000
_diffrn_orient_matrix_UB_12        0.1512495000
_diffrn_orient_matrix_UB_13        0.0443112000
_diffrn_orient_matrix_UB_21        0.1674281000
_diffrn_orient_matrix_UB_22        -0.0181544000
_diffrn_orient_matrix_UB_23        0.0039355000
_diffrn_orient_matrix_UB_31        0.0066855000
_diffrn_orient_matrix_UB_32        0.0803669000
_diffrn_orient_matrix_UB_33        -0.1631192000
_diffrn_radiation_collimation      'HF Varimax focusing mirrors'
_diffrn_radiation_monochromator    mirror
_diffrn_radiation_probe            x-ray
_diffrn_radiation_type             'Cu K\a'
_diffrn_radiation_wavelength       1.54178
_diffrn_source                     'Rotating anode'
_diffrn_source_current             30.0
_diffrn_source_power               1.2
_diffrn_source_target              Cu
_diffrn_source_type                'Rigaku 007 HF'
_diffrn_source_voltage             40.0
_reflns_Friedel_coverage           0.000
_reflns_Friedel_fraction_full      .
_reflns_Friedel_fraction_max       .
_reflns_number_gt                  2429
_reflns_number_total               2836
_reflns_special_details
;
 Reflections were merged by SHELXL according to the crystal
 class for the calculation of statistics and refinement.
 
 _reflns_Friedel_fraction is defined as the number of unique
 Friedel pairs measured divided by the number that would be
 possible theoretically, ignoring centric projections and
 systematic absences.
;
_reflns_threshold_expression       'I > 2\s(I)'
_computing_cell_refinement         'CrysAlisPro 1.171.40.45a (Rigaku OD, 2019)'
_computing_data_collection         'CrysAlisPro 1.171.40.45a (Rigaku OD, 2019)'
_computing_data_reduction          'CrysAlisPro 1.171.40.45a (Rigaku OD, 2019)'
_computing_molecular_graphics      'Olex2 1.5 (Dolomanov et al., 2009)'
_computing_publication_material    'Olex2 1.5 (Dolomanov et al., 2009)'
_computing_structure_refinement    'SHELXL 2018/3 (Sheldrick, 2015)'
_computing_structure_solution      'SHELXT 2018/2 (Sheldrick, 2018)'
_refine_diff_density_max           0.349
_refine_diff_density_min           -0.307
_refine_diff_density_rms           0.059
_refine_ls_extinction_coef         .
_refine_ls_extinction_method       none
_refine_ls_goodness_of_fit_ref     1.076
_refine_ls_hydrogen_treatment      constr
_refine_ls_matrix_type             full
_refine_ls_number_parameters       459
_refine_ls_number_reflns           2836
_refine_ls_number_restraints       1234
_refine_ls_R_factor_all            0.0616
_refine_ls_R_factor_gt             0.0561
_refine_ls_restrained_S_all        1.005
_refine_ls_shift/su_max            0.000
_refine_ls_shift/su_mean           0.000
_refine_ls_structure_factor_coef   Fsqd
_refine_ls_weighting_details      
 'w=1/[\s^2^(Fo^2^)+(0.1164P)^2^+0.1587P] where P=(Fo^2^+2Fc^2^)/3'
_refine_ls_weighting_scheme        calc
_refine_ls_wR_factor_gt            0.1677
_refine_ls_wR_factor_ref           0.1747
_refine_special_details           
 'All crystals attempted were modulated. This was not taken into consideration during the integration which just used the sub-cell. The structure can be reasonably modelled as two components of whole molecule disorder using both geometrical (SADI, DFIX, FLAT) and displacement (RIGU, SIMU) restraints.'
_olex2_refinement_description
;
1. Fixed Uiso
 At 1.2 times of:
  All C(H,H) groups, All N(H) groups
 At 1.5 times of:
  All O(H) groups
2. Restrained distances
 C6-C5
 -1.5 with sigma of 0.02
 N13-C11 \\sim N3-C1
 with sigma of 0.03
 N13-C15 \\sim N3-C5
 with sigma of 0.03
 N12-C11 \\sim N2-C1
 with sigma of 0.03
 N12-C12 \\sim N2-C2
 with sigma of 0.03
 N11-C11 \\sim N1-C1
 with sigma of 0.03
 N11-C17 \\sim N1-C7
 with sigma of 0.03
 N11-C14 \\sim N1-C4
 with sigma of 0.03
 C14-C13 \\sim C4-C3
 with sigma of 0.03
 C12-C13 \\sim C2-C3
 with sigma of 0.03
 N13-N12 \\sim N3-N2
 with sigma of 0.06
 N13-N11 \\sim N3-N1
 with sigma of 0.06
 N12-N11 \\sim N2-N1
 with sigma of 0.06
 N12-C13 \\sim N2-C3
 with sigma of 0.06
 N11-C13 \\sim N1-C3
 with sigma of 0.06
 C11-C15 \\sim C1-C5
 with sigma of 0.06
 C11-C17 \\sim C1-C7
 with sigma of 0.06
 C11-C14 \\sim C1-C4
 with sigma of 0.06
 C11-C12 \\sim C1-C2
 with sigma of 0.06
 C15-C17 \\sim C5-C7
 with sigma of 0.06
 C17-C14 \\sim C7-C4
 with sigma of 0.06
 C14-C12 \\sim C4-C2
 with sigma of 0.06
 C15-C16 \\sim C5-C6
 with sigma of 0.03
 C17-C16 \\sim C7-C6
 with sigma of 0.03
 N13-C16 \\sim N3-C6
 with sigma of 0.06
 N11-C16 \\sim N1-C6
 with sigma of 0.06
 C4-C3 \\sim C14-C13 \\sim C3-C2 \\sim C13-C12 \\sim C6-C5 \\sim C16-C15 \\sim
C17-C16 \\sim C7-C6
 with sigma of 0.03
 C3-C2 \\sim C13-C12 \\sim C6-C5 \\sim C16-C15
 with sigma of 0.02
3. Restrained planarity
 C11, N11, N13, N12
 with sigma of 0.01
 C1, N3, N2, N1
 with sigma of 0.01
4. Uiso/Uaniso restraints and constraints
All non-hydrogen atoms have similar U: within 2A with sigma of 0.04 and sigma
for terminal atoms of 0.08 within 2A
5. Rigid body (RIGU) restrains
 All non-hydrogen atoms
 with sigma for 1-2 distances of 0.004 and sigma for 1-3 distances of 0.004
6. Others
 Fixed Sof: O1(0.5) O2(0.5) O3(0.5) O4(0.5) O5(0.5) O6(0.5) O7(0.5) H7(0.5)
 O8(0.5) H8(0.5) O9(0.5) H9(0.5) O10(0.5) H10(0.5) B1(0.5) B2(0.5) B3(0.5)
 B4(0.5) B5(0.5) N11(0.5) N12(0.5) H12(0.5) N13(0.5) H13(0.5) C11(0.5) C12(0.5)
 H12A(0.5) H12B(0.5) C13(0.5) H13A(0.5) H13B(0.5) C14(0.5) H14A(0.5) H14B(0.5)
 C15(0.5) H15A(0.5) H15B(0.5) C16(0.5) H16A(0.5) H16B(0.5) C17(0.5) H17A(0.5)
 H17B(0.5) O11(0.5) O12(0.5) O13(0.5) O14(0.5) O15(0.5) O16(0.5) O17(0.5)
 H17(0.5) O18(0.5) H18(0.5) O19(0.5) H19(0.5) O20(0.5) H20(0.5) B11(0.5)
 B12(0.5) B13(0.5) B14(0.5) B15(0.5) N1(0.5) N2(0.5) H2(0.5) N3(0.5) H3(0.5)
 C1(0.5) C2(0.5) H2A(0.5) H2B(0.5) C3(0.5) H3A(0.5) H3B(0.5) C4(0.5) H4A(0.5)
 H4B(0.5) C5(0.5) H5A(0.5) H5B(0.5) C6(0.5) H6A(0.5) H6B(0.5) C7(0.5) H7A(0.5)
 H7B(0.5)
7.a Secondary CH2 refined with riding coordinates:
 C12(H12A,H12B), C13(H13A,H13B), C14(H14A,H14B), C15(H15A,H15B), C16(H16A,
 H16B), C17(H17A,H17B), C2(H2A,H2B), C3(H3A,H3B), C4(H4A,H4B), C5(H5A,H5B),
 C6(H6A,H6B), C7(H7A,H7B)
7.b Aromatic/amide H refined with riding coordinates:
 N12(H12), N13(H13), N2(H2), N3(H3)
7.c Idealised tetrahedral OH refined as rotating group:
 O7(H7), O8(H8), O9(H9), O10(H10), O17(H17), O18(H18), O19(H19), O20(H20)
;
_atom_sites_solution_hydrogens     geom
_atom_sites_solution_primary       ?
_atom_sites_solution_secondary     ?
loop_
  _atom_site_label
  _atom_site_type_symbol
  _atom_site_fract_x
  _atom_site_fract_y
  _atom_site_fract_z
  _atom_site_U_iso_or_equiv
  _atom_site_adp_type
  _atom_site_occupancy
  _atom_site_site_symmetry_order
  _atom_site_calc_flag
  _atom_site_refinement_flags_posn
  _atom_site_refinement_flags_adp
  _atom_site_refinement_flags_occupancy
  _atom_site_disorder_assembly
  _atom_site_disorder_group
 O1 O 0.4376(3) 0.9307(3) 0.9166(3) 0.0286(6) Uani 0.5 1 d . U P A 1
 O2 O 0.1823(4) 0.9649(3) 0.9775(3) 0.0336(6) Uani 0.5 1 d . U P A 1
 O3 O 0.2723(3) 0.8275(3) 0.7953(3) 0.0280(5) Uani 0.5 1 d . U P A 1
 O4 O 0.4957(3) 0.6800(3) 0.8826(3) 0.0281(6) Uani 0.5 1 d . U P A 1
 O5 O 0.6996(4) 0.6973(4) 0.7150(4) 0.0301(8) Uani 0.5 1 d . U P A 1
 O6 O 0.4952(3) 0.8908(3) 0.6739(3) 0.0282(6) Uani 0.5 1 d . U P A 1
 O7 O 0.3374(3) 1.0660(4) 1.0966(3) 0.0388(6) Uani 0.5 1 d . U P A 1
 H7 H 0.425305 1.075892 1.097300 0.058 Uiso 0.5 1 calc R U P A 1
 O8 O 0.0221(4) 0.8637(3) 0.8552(3) 0.0339(6) Uani 0.5 1 d . U P A 1
 H8 H -0.039488 0.921773 0.894143 0.051 Uiso 0.5 1 calc R U P A 1
 O9 O 0.7042(4) 0.4898(4) 0.9101(4) 0.0350(8) Uani 0.5 1 d . U P A 1
 H9 H 0.654573 0.453572 0.984089 0.052 Uiso 0.5 1 calc R U P A 1
 O10 O 0.7029(5) 0.8917(5) 0.5082(5) 0.0311(9) Uani 0.5 1 d . U P A 1
 H10 H 0.651069 0.970169 0.464091 0.047 Uiso 0.5 1 calc R U P A 1
 B1 B 0.4216(5) 0.8327(5) 0.8173(5) 0.0272(9) Uani 0.5 1 d . U P A 1
 B2 B 0.3222(5) 0.9861(6) 0.9969(6) 0.0299(8) Uani 0.5 1 d . U P A 1
 B3 B 0.1591(5) 0.8847(6) 0.8770(7) 0.0288(8) Uani 0.5 1 d . U P A 1
 B4 B 0.6296(5) 0.6216(6) 0.8390(5) 0.0290(10) Uani 0.5 1 d . U P A 1
 B5 B 0.6297(6) 0.8298(6) 0.6325(6) 0.0280(10) Uani 0.5 1 d . U P A 1
 N11 N 0.2207(4) 0.5331(4) 0.5768(4) 0.0334(8) Uani 0.5 1 d D U P B 2
 N12 N 0.0222(12) 0.7212(10) 0.5228(10) 0.0423(17) Uani 0.5 1 d D U P B 2
 H12 H -0.073672 0.741254 0.522016 0.051 Uiso 0.5 1 calc R U P B 2
 N13 N 0.0085(12) 0.5248(10) 0.7188(9) 0.0448(18) Uani 0.5 1 d D U P B 2
 H13 H -0.087399 0.545467 0.717859 0.054 Uiso 0.5 1 calc R U P B 2
 C11 C 0.0848(10) 0.5937(11) 0.6052(10) 0.0376(18) Uani 0.5 1 d D U P B 2
 C12 C 0.1070(8) 0.8305(10) 0.4325(8) 0.073(2) Uani 0.5 1 d D U P B 2
 H12A H 0.155688 0.879604 0.493835 0.087 Uiso 0.5 1 calc R U P B 2
 H12B H 0.044887 0.907710 0.362107 0.087 Uiso 0.5 1 calc R U P B 2
 C13 C 0.2213(5) 0.7283(6) 0.3512(5) 0.0553(10) Uani 0.5 1 d D U P B 2
 H13A H 0.169970 0.676624 0.294455 0.066 Uiso 0.5 1 calc R U P B 2
 H13B H 0.284233 0.789983 0.282160 0.066 Uiso 0.5 1 calc R U P B 2
 C14 C 0.3122(5) 0.6160(5) 0.4634(5) 0.0413(9) Uani 0.5 1 d D U P B 2
 H14A H 0.378071 0.544906 0.414638 0.050 Uiso 0.5 1 calc R U P B 2
 H14B H 0.373311 0.667827 0.510092 0.050 Uiso 0.5 1 calc R U P B 2
 C15 C 0.0742(6) 0.4186(9) 0.8430(6) 0.0633(18) Uani 0.5 1 d D U P B 2
 H15A H 0.001359 0.361596 0.901979 0.076 Uiso 0.5 1 calc R U P B 2
 H15B H 0.118074 0.469317 0.906521 0.076 Uiso 0.5 1 calc R U P B 2
 C16 C 0.1946(4) 0.3133(5) 0.7724(5) 0.0517(9) Uani 0.5 1 d D U P B 2
 H16A H 0.247813 0.236605 0.850392 0.062 Uiso 0.5 1 calc R U P B 2
 H16B H 0.148762 0.261729 0.711110 0.062 Uiso 0.5 1 calc R U P B 2
 C17 C 0.2991(4) 0.4065(5) 0.6793(5) 0.0407(9) Uani 0.5 1 d D U P B 2
 H17A H 0.356721 0.443580 0.743502 0.049 Uiso 0.5 1 calc R U P B 2
 H17B H 0.367694 0.343714 0.623853 0.049 Uiso 0.5 1 calc R U P B 2
 O11 O 0.3892(3) 0.8904(3) 0.8896(3) 0.0281(6) Uani 0.5 1 d . U P C 2
 O12 O 0.1345(3) 0.9123(4) 0.9508(4) 0.0375(7) Uani 0.5 1 d . U P C 2
 O13 O 0.2311(3) 0.7848(3) 0.7616(3) 0.0287(6) Uani 0.5 1 d . U P C 2
 O14 O 0.4566(3) 0.6407(3) 0.8544(3) 0.0280(6) Uani 0.5 1 d . U P C 2
 O15 O 0.6667(4) 0.6618(4) 0.6923(4) 0.0299(7) Uani 0.5 1 d . U P C 2
 O16 O 0.4566(3) 0.8533(3) 0.6480(3) 0.0271(6) Uani 0.5 1 d . U P C 2
 O17 O 0.2826(3) 1.0216(3) 1.0701(4) 0.0369(6) Uani 0.5 1 d . U P C 2
 H17 H 0.366319 1.045410 1.062549 0.055 Uiso 0.5 1 calc R U P C 2
 O18 O -0.0219(3) 0.8274(3) 0.8102(3) 0.0361(6) Uani 0.5 1 d . U P C 2
 H18 H -0.083720 0.871980 0.861919 0.054 Uiso 0.5 1 calc R U P C 2
 O19 O 0.6672(4) 0.4525(4) 0.8837(4) 0.0346(8) Uani 0.5 1 d . U P C 2
 H19 H 0.621735 0.419881 0.962080 0.052 Uiso 0.5 1 calc R U P C 2
 O20 O 0.6701(5) 0.8588(5) 0.4891(6) 0.0327(9) Uani 0.5 1 d . U P C 2
 H20 H 0.616681 0.933498 0.440720 0.049 Uiso 0.5 1 calc R U P C 2
 B11 B 0.3794(6) 0.7921(5) 0.7881(4) 0.0264(9) Uani 0.5 1 d . U P C 2
 B12 B 0.2714(8) 0.9404(5) 0.9693(5) 0.0297(8) Uani 0.5 1 d . U P C 2
 B13 B 0.1155(7) 0.8416(5) 0.8412(5) 0.0294(8) Uani 0.5 1 d . U P C 2
 B14 B 0.5937(5) 0.5861(5) 0.8147(5) 0.0276(9) Uani 0.5 1 d . U P C 2
 B15 B 0.5950(6) 0.7969(6) 0.6101(6) 0.0275(10) Uani 0.5 1 d . U P C 2
 N1 N 0.2066(5) 0.5835(4) 0.6067(4) 0.0348(9) Uani 0.5 1 d D U P D 1
 N2 N -0.0058(12) 0.7323(12) 0.5153(12) 0.055(3) Uani 0.5 1 d D U P D 1
 H2 H -0.100537 0.759821 0.526539 0.066 Uiso 0.5 1 calc R U P D 1
 N3 N -0.0192(12) 0.5382(11) 0.7119(11) 0.052(2) Uani 0.5 1 d D U P D 1
 H3 H -0.112580 0.573464 0.721950 0.062 Uiso 0.5 1 calc R U P D 1
 C1 C 0.0623(9) 0.6165(10) 0.6127(9) 0.0333(18) Uani 0.5 1 d D U P D 1
 C2 C 0.0725(8) 0.8136(11) 0.3921(11) 0.090(3) Uani 0.5 1 d D U P D 1
 H2A H 0.056909 0.777340 0.304078 0.108 Uiso 0.5 1 calc R U P D 1
 H2B H 0.027698 0.920324 0.374635 0.108 Uiso 0.5 1 calc R U P D 1
 C3 C 0.2195(7) 0.8050(8) 0.4033(7) 0.0773(16) Uani 0.5 1 d D U P D 1
 H3A H 0.235108 0.892996 0.438848 0.093 Uiso 0.5 1 calc R U P D 1
 H3B H 0.264861 0.814383 0.303223 0.093 Uiso 0.5 1 calc R U P D 1
 C4 C 0.3005(5) 0.6699(6) 0.4988(5) 0.0439(10) Uani 0.5 1 d D U P D 1
 H4A H 0.353960 0.604334 0.436244 0.053 Uiso 0.5 1 calc R U P D 1
 H4B H 0.373570 0.700792 0.551888 0.053 Uiso 0.5 1 calc R U P D 1
 C5 C 0.0415(7) 0.3934(8) 0.8064(8) 0.0650(16) Uani 0.5 1 d D U P D 1
 H5A H -0.017935 0.374858 0.899011 0.078 Uiso 0.5 1 calc R U P D 1
 H5B H 0.038810 0.311583 0.755955 0.078 Uiso 0.5 1 calc R U P D 1
 C6 C 0.1865(6) 0.3959(7) 0.8373(6) 0.0698(13) Uani 0.5 1 d D U P D 1
 H6A H 0.232449 0.291578 0.877462 0.084 Uiso 0.5 1 calc R U P D 1
 H6B H 0.183228 0.450873 0.916414 0.084 Uiso 0.5 1 calc R U P D 1
 C7 C 0.2850(5) 0.4622(6) 0.7167(5) 0.0440(10) Uani 0.5 1 d D U P D 1
 H7A H 0.360082 0.501475 0.759078 0.053 Uiso 0.5 1 calc R U P D 1
 H7B H 0.335592 0.382820 0.667926 0.053 Uiso 0.5 1 calc R U P D 1

loop_
  _atom_site_aniso_label
  _atom_site_aniso_U_11
  _atom_site_aniso_U_22
  _atom_site_aniso_U_33
  _atom_site_aniso_U_23
  _atom_site_aniso_U_13
  _atom_site_aniso_U_12
 O1 0.0312(14) 0.0309(13) 0.0263(12) -0.0119(10) 0.0029(9) -0.0064(10)
 O2 0.0302(18) 0.0436(15) 0.0319(13) -0.0207(11) 0.0002(11) -0.0030(14)
 O3 0.0289(16) 0.0301(13) 0.0260(12) -0.0100(10) 0.0028(10) -0.0036(11)
 O4 0.0300(14) 0.0258(14) 0.0267(13) -0.0058(10) 0.0039(9) -0.0018(10)
 O5 0.0318(18) 0.0276(18) 0.0272(15) -0.0042(12) 0.0053(12) -0.0006(12)
 O6 0.0297(15) 0.0288(14) 0.0247(13) -0.0068(10) 0.0045(10) -0.0028(10)
 O7 0.0328(14) 0.0538(16) 0.0379(15) -0.0289(12) 0.0026(10) -0.0057(12)
 O8 0.0269(16) 0.0430(15) 0.0354(14) -0.0187(11) 0.0007(11) -0.0030(12)
 O9 0.0341(18) 0.0304(17) 0.0320(17) 0.0015(12) 0.0067(12) 0.0029(12)
 O10 0.032(2) 0.029(2) 0.0281(16) -0.0031(13) 0.0068(13) -0.0014(13)
 B1 0.033(2) 0.025(2) 0.022(2) -0.0032(16) 0.0008(16) -0.0050(16)
 B2 0.032(2) 0.034(2) 0.025(2) -0.0114(17) -0.0010(17) -0.0041(18)
 B3 0.030(2) 0.030(2) 0.026(2) -0.0072(18) -0.0016(18) -0.0043(17)
 B4 0.032(2) 0.030(2) 0.025(2) -0.0072(16) -0.0013(16) -0.0035(16)
 B5 0.033(3) 0.029(3) 0.024(2) -0.0085(16) -0.0011(16) -0.0060(16)
 N11 0.0319(17) 0.038(2) 0.0341(19) -0.0164(15) 0.0037(13) -0.0066(15)
 N12 0.038(4) 0.048(3) 0.042(3) -0.018(3) -0.002(2) 0.001(2)
 N13 0.041(4) 0.051(3) 0.047(3) -0.026(3) 0.013(2) -0.005(2)
 C11 0.035(3) 0.043(3) 0.039(3) -0.017(2) 0.002(2) -0.007(2)
 C12 0.043(3) 0.086(4) 0.070(4) 0.039(3) -0.033(2) -0.022(3)
 C13 0.054(2) 0.065(3) 0.048(2) 0.002(2) 0.0025(17) -0.033(2)
 C14 0.038(2) 0.049(2) 0.044(2) -0.0224(19) 0.0091(16) -0.0144(18)
 C15 0.043(3) 0.110(4) 0.035(3) 0.013(2) -0.0100(19) -0.045(3)
 C16 0.049(2) 0.055(2) 0.044(2) 0.0072(18) -0.0091(16) -0.0110(17)
 C17 0.0347(19) 0.042(2) 0.046(2) -0.0156(18) -0.0056(16) 0.0016(17)
 O11 0.0338(15) 0.0284(13) 0.0246(13) -0.0122(11) 0.0036(11) -0.0050(10)
 O12 0.0326(16) 0.0488(17) 0.0394(17) -0.0286(14) 0.0087(13) -0.0083(11)
 O13 0.0289(14) 0.0290(12) 0.0280(12) -0.0085(10) 0.0035(9) -0.0034(9)
 O14 0.0316(15) 0.0254(13) 0.0256(13) -0.0053(10) 0.0043(10) -0.0037(10)
 O15 0.0331(18) 0.0251(17) 0.0284(16) -0.0043(11) 0.0064(12) -0.0019(11)
 O16 0.0299(15) 0.0275(14) 0.0219(13) -0.0041(10) 0.0038(10) -0.0034(10)
 O17 0.0361(15) 0.0440(15) 0.0384(15) -0.0259(12) 0.0075(13) -0.0092(11)
 O18 0.0311(14) 0.0417(14) 0.0406(14) -0.0196(11) 0.0050(10) -0.0086(10)
 O19 0.0340(18) 0.0290(17) 0.0348(18) -0.0018(11) 0.0086(12) -0.0006(11)
 O20 0.034(2) 0.029(2) 0.0305(18) -0.0018(13) 0.0062(14) -0.0013(13)
 B11 0.032(3) 0.026(2) 0.0218(18) -0.0084(15) 0.0028(15) -0.0025(17)
 B12 0.031(3) 0.030(2) 0.029(2) -0.0112(16) 0.0025(18) -0.004(2)
 B13 0.029(3) 0.030(2) 0.028(2) -0.0066(16) 0.0011(17) -0.0034(18)
 B14 0.032(2) 0.029(2) 0.023(2) -0.0093(16) 0.0016(16) -0.0054(16)
 B15 0.033(3) 0.027(2) 0.024(2) -0.0086(16) 0.0018(17) -0.0042(17)
 N1 0.0310(19) 0.041(2) 0.0351(19) -0.0174(15) 0.0001(13) -0.0005(16)
 N2 0.030(3) 0.066(4) 0.054(4) 0.012(3) -0.005(2) 0.002(2)
 N3 0.029(3) 0.058(3) 0.055(3) 0.009(2) 0.0099(19) -0.002(2)
 C1 0.037(3) 0.043(3) 0.024(3) -0.020(2) 0.004(2) -0.002(2)
 C2 0.058(4) 0.073(4) 0.110(7) 0.030(4) -0.003(4) -0.004(3)
 C3 0.074(4) 0.083(4) 0.070(3) 0.019(3) -0.023(3) -0.037(3)
 C4 0.045(2) 0.053(3) 0.041(2) -0.0230(19) 0.0107(16) -0.016(2)
 C5 0.054(3) 0.067(3) 0.066(4) -0.005(3) 0.000(3) -0.003(3)
 C6 0.061(3) 0.071(3) 0.068(3) 0.011(3) -0.024(2) -0.012(2)
 C7 0.039(2) 0.047(3) 0.046(2) -0.0192(18) -0.0067(16) 0.0057(18)

_geom_special_details
;
 All esds (except the esd in the dihedral angle between two l.s. planes)
 are estimated using the full covariance matrix.  The cell esds are taken
 into account individually in the estimation of esds in distances, angles
 and torsion angles; correlations between esds in cell parameters are only
 used when they are defined by crystal symmetry.  An approximate (isotropic)
 treatment of cell esds is used for estimating esds involving l.s. planes.
;
loop_
  _geom_bond_atom_site_label_1
  _geom_bond_atom_site_label_2
  _geom_bond_distance
  _geom_bond_site_symmetry_2
  _geom_bond_publ_flag
 O1 B1 1.478(6) . ?
 O1 B2 1.360(6) . ?
 O2 B2 1.383(5) . ?
 O2 B3 1.381(8) . ?
 O3 B1 1.432(5) . ?
 O3 B3 1.360(7) . ?
 O4 B1 1.481(5) . ?
 O4 B4 1.344(6) . ?
 O5 B4 1.392(6) . ?
 O5 B5 1.378(6) . ?
 O6 B1 1.491(5) . ?
 O6 B5 1.349(6) . ?
 O7 H7 0.8400 . ?
 O7 B2 1.352(7) . ?
 O8 H8 0.8400 . ?
 O8 B3 1.361(6) . ?
 O9 H9 0.8400 . ?
 O9 B4 1.352(6) . ?
 O10 H10 0.8400 . ?
 O10 B5 1.364(7) . ?
 N11 C11 1.327(10) . ?
 N11 C14 1.470(6) . ?
 N11 C17 1.459(6) . ?
 N12 H12 0.8800 . ?
 N12 C11 1.323(11) . ?
 N12 C12 1.468(11) . ?
 N13 H13 0.8800 . ?
 N13 C11 1.333(12) . ?
 N13 C15 1.440(10) . ?
 C12 H12A 0.9900 . ?
 C12 H12B 0.9900 . ?
 C12 C13 1.574(9) . ?
 C13 H13A 0.9900 . ?
 C13 H13B 0.9900 . ?
 C13 C14 1.495(6) . ?
 C14 H14A 0.9900 . ?
 C14 H14B 0.9900 . ?
 C15 H15A 0.9900 . ?
 C15 H15B 0.9900 . ?
 C15 C16 1.568(8) . ?
 C16 H16A 0.9900 . ?
 C16 H16B 0.9900 . ?
 C16 C17 1.509(6) . ?
 C17 H17A 0.9900 . ?
 C17 H17B 0.9900 . ?
 O11 B11 1.483(5) . ?
 O11 B12 1.354(6) . ?
 O12 B12 1.376(8) . ?
 O12 B13 1.379(5) . ?
 O13 B11 1.438(6) . ?
 O13 B13 1.362(6) . ?
 O14 B11 1.484(5) . ?
 O14 B14 1.348(5) . ?
 O15 B14 1.396(6) . ?
 O15 B15 1.399(6) . ?
 O16 B11 1.488(5) . ?
 O16 B15 1.358(6) . ?
 O17 H17 0.8400 . ?
 O17 B12 1.360(6) . ?
 O18 H18 0.8400 . ?
 O18 B13 1.368(7) . ?
 O19 H19 0.8400 . ?
 O19 B14 1.354(6) . ?
 O20 H20 0.8400 . ?
 O20 B15 1.350(7) . ?
 N1 C1 1.324(9) . ?
 N1 C4 1.472(6) . ?
 N1 C7 1.470(6) . ?
 N2 H2 0.8800 . ?
 N2 C1 1.339(11) . ?
 N2 C2 1.448(12) . ?
 N3 H3 0.8800 . ?
 N3 C1 1.320(11) . ?
 N3 C5 1.478(10) . ?
 C2 H2A 0.9900 . ?
 C2 H2B 0.9900 . ?
 C2 C3 1.368(7) . ?
 C3 H3A 0.9900 . ?
 C3 H3B 0.9900 . ?
 C3 C4 1.485(7) . ?
 C4 H4A 0.9900 . ?
 C4 H4B 0.9900 . ?
 C5 H5A 0.9900 . ?
 C5 H5B 0.9900 . ?
 C5 C6 1.407(6) . ?
 C6 H6A 0.9900 . ?
 C6 H6B 0.9900 . ?
 C6 C7 1.488(7) . ?
 C7 H7A 0.9900 . ?
 C7 H7B 0.9900 . ?

loop_
  _geom_angle_atom_site_label_1
  _geom_angle_atom_site_label_2
  _geom_angle_atom_site_label_3
  _geom_angle
  _geom_angle_site_symmetry_1
  _geom_angle_site_symmetry_3
  _geom_angle_publ_flag
 B2 O1 B1 121.8(4) . . ?
 B3 O2 B2 119.8(4) . . ?
 B3 O3 B1 123.0(5) . . ?
 B4 O4 B1 123.6(3) . . ?
 B5 O5 B4 120.2(4) . . ?
 B5 O6 B1 123.2(3) . . ?
 B2 O7 H7 109.5 . . ?
 B3 O8 H8 109.5 . . ?
 B4 O9 H9 109.5 . . ?
 B5 O10 H10 109.5 . . ?
 O1 B1 O4 108.0(3) . . ?
 O1 B1 O6 107.6(4) . . ?
 O3 B1 O1 112.8(3) . . ?
 O3 B1 O4 109.0(4) . . ?
 O3 B1 O6 109.6(3) . . ?
 O4 B1 O6 109.7(3) . . ?
 O1 B2 O2 120.8(6) . . ?
 O7 B2 O1 122.3(4) . . ?
 O7 B2 O2 116.9(4) . . ?
 O3 B3 O2 120.7(4) . . ?
 O3 B3 O8 118.5(7) . . ?
 O8 B3 O2 120.8(5) . . ?
 O4 B4 O5 120.3(4) . . ?
 O4 B4 O9 123.5(4) . . ?
 O9 B4 O5 116.2(4) . . ?
 O6 B5 O5 120.6(4) . . ?
 O6 B5 O10 123.1(5) . . ?
 O10 B5 O5 116.2(5) . . ?
 C11 N11 C14 120.3(6) . . ?
 C11 N11 C17 122.0(6) . . ?
 C17 N11 C14 115.5(4) . . ?
 C11 N12 H12 118.8 . . ?
 C11 N12 C12 122.4(9) . . ?
 C12 N12 H12 118.8 . . ?
 C11 N13 H13 118.2 . . ?
 C11 N13 C15 123.7(9) . . ?
 C15 N13 H13 118.2 . . ?
 N11 C11 N13 119.6(9) . . ?
 N12 C11 N11 121.5(9) . . ?
 N12 C11 N13 118.9(9) . . ?
 N12 C12 H12A 111.5 . . ?
 N12 C12 H12B 111.5 . . ?
 N12 C12 C13 101.6(7) . . ?
 H12A C12 H12B 109.3 . . ?
 C13 C12 H12A 111.5 . . ?
 C13 C12 H12B 111.5 . . ?
 C12 C13 H13A 110.0 . . ?
 C12 C13 H13B 110.0 . . ?
 H13A C13 H13B 108.4 . . ?
 C14 C13 C12 108.6(4) . . ?
 C14 C13 H13A 110.0 . . ?
 C14 C13 H13B 110.0 . . ?
 N11 C14 C13 111.4(4) . . ?
 N11 C14 H14A 109.4 . . ?
 N11 C14 H14B 109.4 . . ?
 C13 C14 H14A 109.4 . . ?
 C13 C14 H14B 109.4 . . ?
 H14A C14 H14B 108.0 . . ?
 N13 C15 H15A 111.0 . . ?
 N13 C15 H15B 111.0 . . ?
 N13 C15 C16 104.0(5) . . ?
 H15A C15 H15B 109.0 . . ?
 C16 C15 H15A 111.0 . . ?
 C16 C15 H15B 111.0 . . ?
 C15 C16 H16A 109.9 . . ?
 C15 C16 H16B 109.9 . . ?
 H16A C16 H16B 108.3 . . ?
 C17 C16 C15 108.7(4) . . ?
 C17 C16 H16A 109.9 . . ?
 C17 C16 H16B 109.9 . . ?
 N11 C17 C16 111.0(3) . . ?
 N11 C17 H17A 109.4 . . ?
 N11 C17 H17B 109.4 . . ?
 C16 C17 H17A 109.4 . . ?
 C16 C17 H17B 109.4 . . ?
 H17A C17 H17B 108.0 . . ?
 B12 O11 B11 121.8(4) . . ?
 B12 O12 B13 119.1(4) . . ?
 B13 O13 B11 122.4(4) . . ?
 B14 O14 B11 123.8(3) . . ?
 B14 O15 B15 118.9(4) . . ?
 B15 O16 B11 123.6(3) . . ?
 B12 O17 H17 109.5 . . ?
 B13 O18 H18 109.5 . . ?
 B14 O19 H19 109.5 . . ?
 B15 O20 H20 109.5 . . ?
 O11 B11 O14 107.6(3) . . ?
 O11 B11 O16 107.1(4) . . ?
 O13 B11 O11 112.5(3) . . ?
 O13 B11 O14 109.9(4) . . ?
 O13 B11 O16 110.2(3) . . ?
 O14 B11 O16 109.5(3) . . ?
 O11 B12 O12 121.3(4) . . ?
 O11 B12 O17 121.7(6) . . ?
 O17 B12 O12 117.0(5) . . ?
 O13 B13 O12 121.5(6) . . ?
 O13 B13 O18 118.5(5) . . ?
 O18 B13 O12 120.0(4) . . ?
 O14 B14 O15 121.2(4) . . ?
 O14 B14 O19 123.3(4) . . ?
 O19 B14 O15 115.3(4) . . ?
 O16 B15 O15 120.7(4) . . ?
 O20 B15 O15 115.1(5) . . ?
 O20 B15 O16 124.0(5) . . ?
 C1 N1 C4 123.6(6) . . ?
 C1 N1 C7 121.2(6) . . ?
 C7 N1 C4 115.0(4) . . ?
 C1 N2 H2 119.1 . . ?
 C1 N2 C2 121.7(9) . . ?
 C2 N2 H2 119.1 . . ?
 C1 N3 H3 119.0 . . ?
 C1 N3 C5 122.0(9) . . ?
 C5 N3 H3 119.0 . . ?
 N1 C1 N2 119.9(9) . . ?
 N3 C1 N1 122.4(9) . . ?
 N3 C1 N2 117.7(8) . . ?
 N2 C2 H2A 108.0 . . ?
 N2 C2 H2B 108.0 . . ?
 H2A C2 H2B 107.2 . . ?
 C3 C2 N2 117.4(8) . . ?
 C3 C2 H2A 108.0 . . ?
 C3 C2 H2B 108.0 . . ?
 C2 C3 H3A 107.7 . . ?
 C2 C3 H3B 107.7 . . ?
 C2 C3 C4 118.5(6) . . ?
 H3A C3 H3B 107.1 . . ?
 C4 C3 H3A 107.7 . . ?
 C4 C3 H3B 107.7 . . ?
 N1 C4 C3 113.8(4) . . ?
 N1 C4 H4A 108.8 . . ?
 N1 C4 H4B 108.8 . . ?
 C3 C4 H4A 108.8 . . ?
 C3 C4 H4B 108.8 . . ?
 H4A C4 H4B 107.7 . . ?
 N3 C5 H5A 109.8 . . ?
 N3 C5 H5B 109.8 . . ?
 H5A C5 H5B 108.2 . . ?
 C6 C5 N3 109.4(7) . . ?
 C6 C5 H5A 109.8 . . ?
 C6 C5 H5B 109.8 . . ?
 C5 C6 H6A 107.6 . . ?
 C5 C6 H6B 107.6 . . ?
 C5 C6 C7 118.9(5) . . ?
 H6A C6 H6B 107.0 . . ?
 C7 C6 H6A 107.6 . . ?
 C7 C6 H6B 107.6 . . ?
 N1 C7 C6 112.7(4) . . ?
 N1 C7 H7A 109.1 . . ?
 N1 C7 H7B 109.1 . . ?
 C6 C7 H7A 109.1 . . ?
 C6 C7 H7B 109.1 . . ?
 H7A C7 H7B 107.8 . . ?

loop_
  _geom_hbond_atom_site_label_D
  _geom_hbond_atom_site_label_H
  _geom_hbond_atom_site_label_A
  _geom_hbond_distance_DH
  _geom_hbond_distance_HA
  _geom_hbond_distance_DA
  _geom_hbond_angle_DHA
  _geom_hbond_site_symmetry_A
  _geom_hbond_publ_flag
 O7 H7 O1 0.84 1.27 2.094(4) 168.0 2_677 yes
 O8 H8 O2 0.84 2.05 2.876(4) 169.8 2_577 yes
 O9 H9 O4 0.84 2.16 2.965(4) 159.2 2_667 yes
 O10 H10 O6 0.84 2.02 2.828(6) 160.9 2_676 yes
 N12 H12 O20 0.88 2.45 3.315(12) 165.9 1_455 yes
 N13 H13 O15 0.88 2.36 3.221(11) 165.8 1_455 yes
 O17 H17 O11 0.84 2.55 3.368(4) 165.3 2_677 yes
 O18 H18 O17 0.84 2.07 2.873(4) 159.4 2_577 yes
 O19 H19 O14 0.84 1.82 2.653(5) 171.3 2_667 yes
 O20 H20 O16 0.84 1.99 2.787(6) 158.8 2_676 yes
 N2 H2 O10 0.88 2.01 2.853(12) 159.2 1_455 yes
 N3 H3 O5 0.88 1.92 2.775(11) 165.1 1_455 yes

loop_
  _geom_torsion_atom_site_label_1
  _geom_torsion_atom_site_label_2
  _geom_torsion_atom_site_label_3
  _geom_torsion_atom_site_label_4
  _geom_torsion
  _geom_torsion_site_symmetry_1
  _geom_torsion_site_symmetry_2
  _geom_torsion_site_symmetry_3
  _geom_torsion_site_symmetry_4
  _geom_torsion_publ_flag
 B1 O1 B2 O2 -6.5(5) . . . . ?
 B1 O1 B2 O7 174.7(3) . . . . ?
 B1 O3 B3 O2 6.4(5) . . . . ?
 B1 O3 B3 O8 -174.9(3) . . . . ?
 B1 O4 B4 O5 -8.2(7) . . . . ?
 B1 O4 B4 O9 171.7(4) . . . . ?
 B1 O6 B5 O5 8.0(7) . . . . ?
 B1 O6 B5 O10 -173.2(4) . . . . ?
 B2 O1 B1 O3 11.0(4) . . . . ?
 B2 O1 B1 O4 -109.5(4) . . . . ?
 B2 O1 B1 O6 132.1(3) . . . . ?
 B2 O2 B3 O3 -0.7(5) . . . . ?
 B2 O2 B3 O8 -179.4(3) . . . . ?
 B3 O2 B2 O1 0.9(5) . . . . ?
 B3 O2 B2 O7 179.8(3) . . . . ?
 B3 O3 B1 O1 -11.0(4) . . . . ?
 B3 O3 B1 O4 109.0(4) . . . . ?
 B3 O3 B1 O6 -130.9(4) . . . . ?
 B4 O4 B1 O1 -100.5(4) . . . . ?
 B4 O4 B1 O3 136.6(4) . . . . ?
 B4 O4 B1 O6 16.5(6) . . . . ?
 B4 O5 B5 O6 2.6(7) . . . . ?
 B4 O5 B5 O10 -176.3(4) . . . . ?
 B5 O5 B4 O4 -2.6(7) . . . . ?
 B5 O5 B4 O9 177.6(4) . . . . ?
 B5 O6 B1 O1 100.8(4) . . . . ?
 B5 O6 B1 O3 -136.1(4) . . . . ?
 B5 O6 B1 O4 -16.4(6) . . . . ?
 N12 C12 C13 C14 -61.9(6) . . . . ?
 N13 C15 C16 C17 58.5(6) . . . . ?
 C11 N11 C14 C13 -25.3(6) . . . . ?
 C11 N11 C17 C16 27.4(6) . . . . ?
 C11 N12 C12 C13 48.7(7) . . . . ?
 C11 N13 C15 C16 -46.1(7) . . . . ?
 C12 N12 C11 N11 -22.9(7) . . . . ?
 C12 N12 C11 N13 157.4(7) . . . . ?
 C12 C13 C14 N11 53.6(6) . . . . ?
 C14 N11 C11 N12 7.7(5) . . . . ?
 C14 N11 C11 N13 -172.6(4) . . . . ?
 C14 N11 C17 C16 -169.6(4) . . . . ?
 C15 N13 C11 N11 22.5(7) . . . . ?
 C15 N13 C11 N12 -157.8(7) . . . . ?
 C15 C16 C17 N11 -51.7(5) . . . . ?
 C17 N11 C11 N12 169.9(5) . . . . ?
 C17 N11 C11 N13 -10.4(5) . . . . ?
 C17 N11 C14 C13 171.5(4) . . . . ?
 B11 O11 B12 O12 -5.4(5) . . . . ?
 B11 O11 B12 O17 175.2(3) . . . . ?
 B11 O13 B13 O12 1.2(5) . . . . ?
 B11 O13 B13 O18 -178.9(3) . . . . ?
 B11 O14 B14 O15 -9.1(7) . . . . ?
 B11 O14 B14 O19 174.7(4) . . . . ?
 B11 O16 B15 O15 9.6(7) . . . . ?
 B11 O16 B15 O20 -174.4(4) . . . . ?
 B12 O11 B11 O13 12.5(4) . . . . ?
 B12 O11 B11 O14 -108.6(4) . . . . ?
 B12 O11 B11 O16 133.7(3) . . . . ?
 B12 O12 B13 O13 7.1(5) . . . . ?
 B12 O12 B13 O18 -172.7(3) . . . . ?
 B13 O12 B12 O11 -4.9(5) . . . . ?
 B13 O12 B12 O17 174.5(3) . . . . ?
 B13 O13 B11 O11 -10.4(4) . . . . ?
 B13 O13 B11 O14 109.4(4) . . . . ?
 B13 O13 B11 O16 -129.8(3) . . . . ?
 B14 O14 B11 O11 -99.9(4) . . . . ?
 B14 O14 B11 O13 137.3(4) . . . . ?
 B14 O14 B11 O16 16.1(6) . . . . ?
 B14 O15 B15 O16 -0.3(6) . . . . ?
 B14 O15 B15 O20 -176.5(4) . . . . ?
 B15 O15 B14 O14 0.0(6) . . . . ?
 B15 O15 B14 O19 176.5(4) . . . . ?
 B15 O16 B11 O11 100.0(4) . . . . ?
 B15 O16 B11 O13 -137.4(4) . . . . ?
 B15 O16 B11 O14 -16.4(6) . . . . ?
 N2 C2 C3 C4 27.2(14) . . . . ?
 N3 C5 C6 C7 -42.9(9) . . . . ?
 C1 N1 C4 C3 4.2(7) . . . . ?
 C1 N1 C7 C6 -5.6(6) . . . . ?
 C1 N2 C2 C3 -22.0(15) . . . . ?
 C1 N3 C5 C6 33.5(10) . . . . ?
 C2 N2 C1 N1 7.1(10) . . . . ?
 C2 N2 C1 N3 -172.5(10) . . . . ?
 C2 C3 C4 N1 -18.8(10) . . . . ?
 C4 N1 C1 N2 1.3(6) . . . . ?
 C4 N1 C1 N3 -179.1(5) . . . . ?
 C4 N1 C7 C6 170.1(4) . . . . ?
 C5 N3 C1 N1 -11.0(9) . . . . ?
 C5 N3 C1 N2 168.6(9) . . . . ?
 C5 C6 C7 N1 31.0(8) . . . . ?
 C7 N1 C1 N2 176.7(5) . . . . ?
 C7 N1 C1 N3 -3.8(6) . . . . ?
 C7 N1 C4 C3 -171.4(4) . . . . ?

_shelx_res_file
;
TITL 2019ncs0282_2b_a.res in P-1
    2019ncs0282_2b.res
    created by SHELXL-2018/3 at 09:39:34 on 16-Mar-2023
REM Old TITL 2019ncs0282_2b in P-1
REM SHELXT solution in P-1: R1 0.493, Rweak 0.138, Alpha 0.135
REM <I/s> 0.000 for 0 systematic absences, Orientation as input
REM Formula found by SHELXT: C11 N12 O12
CELL 1.54178 9.3096 9.3175 9.3733 76.598 85.611 79.947
ZERR 2 0.0006 0.0003 0.0006 0.005 0.005 0.004
LATT 1
SFAC C H B N O
UNIT 14 36 10 6 20
EQIV $1 1-X,2-Y,2-Z
EQIV $2 1-X,1-Y,2-Z
EQIV $3 1-X,2-Y,1-Z
EQIV $4 -1+X,+Y,+Z
EQIV $5 -X,2-Y,2-Z
DFIX -1.5 C6 C5
SADI 0.03 N13 C11 N3 C1
SADI 0.03 N13 C15 N3 C5
SADI 0.03 N12 C11 N2 C1
SADI 0.03 N12 C12 N2 C2
SADI 0.03 N11 C11 N1 C1
SADI 0.03 N11 C17 N1 C7
SADI 0.03 N11 C14 N1 C4
SADI 0.03 C14 C13 C4 C3
SADI 0.03 C12 C13 C2 C3
SADI 0.06 N13 N12 N3 N2
SADI 0.06 N13 N11 N3 N1
SADI 0.06 N12 N11 N2 N1
SADI 0.06 N12 C13 N2 C3
SADI 0.06 N11 C13 N1 C3
SADI 0.06 C11 C15 C1 C5
SADI 0.06 C11 C17 C1 C7
SADI 0.06 C11 C14 C1 C4
SADI 0.06 C11 C12 C1 C2
SADI 0.06 C15 C17 C5 C7
SADI 0.06 C17 C14 C7 C4
SADI 0.06 C14 C12 C4 C2
SADI 0.03 C15 C16 C5 C6
SADI 0.03 C17 C16 C7 C6
SADI 0.06 N13 C16 N3 C6
SADI 0.06 N11 C16 N1 C6
SADI 0.03 C4 C3 C14 C13 C3 C2 C13 C12 C6 C5 C16 C15 C17 C16 C7 C6
RIGU
FLAT 0.01 C11 N11 N13 N12
FLAT 0.01 C1 N3 N2 N1
SIMU
SADI C3 C2 C13 C12 C6 C5 C16 C15

L.S. 11 0 0
PLAN  5
SIZE 0.02 0.11 0.21
TEMP -173(2)
HTAB O7 O1_$1
HTAB O8 O2_$5
HTAB O9 O4_$2
HTAB O10 O6_$3
HTAB N12 O20_$4
HTAB N13 O15_$4
HTAB O17 O11_$1
HTAB O18 O17_$5
HTAB O19 O14_$2
HTAB O20 O16_$3
HTAB N2 O10_$4
HTAB N3 O5_$4
CONF
BOND $H
MORE -1
fmap 2 53
acta
REM <olex2.extras>
REM <HklSrc "%.\\2019ncs0282_2b.hkl">
REM </olex2.extras>

WGHT    0.116400    0.158700
FVAR       1.06295
PART 1
O1    5    0.437555    0.930663    0.916640    10.50000    0.03117    0.03089 =
         0.02630   -0.01185    0.00295   -0.00645
O2    5    0.182281    0.964902    0.977531    10.50000    0.03015    0.04356 =
         0.03195   -0.02068    0.00015   -0.00297
O3    5    0.272272    0.827452    0.795340    10.50000    0.02886    0.03010 =
         0.02599   -0.01001    0.00279   -0.00356
O4    5    0.495718    0.679956    0.882633    10.50000    0.03001    0.02585 =
         0.02665   -0.00578    0.00392   -0.00180
O5    5    0.699642    0.697271    0.714997    10.50000    0.03183    0.02763 =
         0.02720   -0.00415    0.00535   -0.00058
O6    5    0.495245    0.890802    0.673870    10.50000    0.02974    0.02881 =
         0.02472   -0.00681    0.00454   -0.00277
O7    5    0.337399    1.066025    1.096596    10.50000    0.03281    0.05383 =
         0.03785   -0.02886    0.00264   -0.00566
AFIX 147
H7    2    0.425305    1.075892    1.097300    10.50000   -1.50000
AFIX   0
O8    5    0.022076    0.863684    0.855240    10.50000    0.02691    0.04300 =
         0.03544   -0.01872    0.00065   -0.00305
AFIX 147
H8    2   -0.039488    0.921773    0.894143    10.50000   -1.50000
AFIX   0
O9    5    0.704157    0.489842    0.910052    10.50000    0.03405    0.03040 =
         0.03202    0.00153    0.00671    0.00289
AFIX 147
H9    2    0.654573    0.453572    0.984089    10.50000   -1.50000
AFIX   0
O10   5    0.702895    0.891694    0.508201    10.50000    0.03194    0.02903 =
         0.02810   -0.00311    0.00679   -0.00135
AFIX 147
H10   2    0.651069    0.970169    0.464091    10.50000   -1.50000
AFIX   0
B1    3    0.421647    0.832702    0.817340    10.50000    0.03330    0.02466 =
         0.02237   -0.00322    0.00075   -0.00499
B2    3    0.322227    0.986141    0.996887    10.50000    0.03240    0.03410 =
         0.02509   -0.01140   -0.00104   -0.00405
B3    3    0.159074    0.884674    0.877002    10.50000    0.03019    0.03034 =
         0.02627   -0.00719   -0.00157   -0.00431
B4    3    0.629649    0.621644    0.839040    10.50000    0.03175    0.03044 =
         0.02479   -0.00722   -0.00133   -0.00354
B5    3    0.629681    0.829794    0.632532    10.50000    0.03269    0.02879 =
         0.02409   -0.00845   -0.00107   -0.00595

PART 2
N11   4    0.220742    0.533145    0.576801    10.50000    0.03188    0.03806 =
         0.03407   -0.01639    0.00372   -0.00658
N12   4    0.022244    0.721198    0.522764    10.50000    0.03791    0.04828 =
         0.04172   -0.01822   -0.00151    0.00112
AFIX  43
H12   2   -0.073672    0.741254    0.522016    10.50000   -1.20000
AFIX   0
N13   4    0.008488    0.524834    0.718802    10.50000    0.04086    0.05079 =
         0.04690   -0.02578    0.01283   -0.00490
AFIX  43
H13   2   -0.087399    0.545467    0.717859    10.50000   -1.20000
AFIX   0
C11   1    0.084757    0.593691    0.605209    10.50000    0.03508    0.04263 =
         0.03864   -0.01694    0.00184   -0.00697
C12   1    0.107014    0.830494    0.432452    10.50000    0.04345    0.08628 =
         0.06994    0.03911   -0.03252   -0.02206
AFIX  23
H12A  2    0.155688    0.879604    0.493835    10.50000   -1.20000
H12B  2    0.044887    0.907710    0.362107    10.50000   -1.20000
AFIX   0
C13   1    0.221265    0.728268    0.351189    10.50000    0.05399    0.06456 =
         0.04775    0.00236    0.00249   -0.03289
AFIX  23
H13A  2    0.169970    0.676624    0.294455    10.50000   -1.20000
H13B  2    0.284233    0.789983    0.282160    10.50000   -1.20000
AFIX   0
C14   1    0.312180    0.616028    0.463418    10.50000    0.03753    0.04892 =
         0.04438   -0.02240    0.00915   -0.01436
AFIX  23
H14A  2    0.378071    0.544906    0.414638    10.50000   -1.20000
H14B  2    0.373311    0.667827    0.510092    10.50000   -1.20000
AFIX   0
C15   1    0.074232    0.418567    0.842977    10.50000    0.04314    0.11048 =
         0.03537    0.01291   -0.01004   -0.04521
AFIX  23
H15A  2    0.001359    0.361596    0.901979    10.50000   -1.20000
H15B  2    0.118074    0.469317    0.906521    10.50000   -1.20000
AFIX   0
C16   1    0.194564    0.313298    0.772429    10.50000    0.04850    0.05539 =
         0.04427    0.00719   -0.00911   -0.01104
AFIX  23
H16A  2    0.247813    0.236605    0.850392    10.50000   -1.20000
H16B  2    0.148762    0.261729    0.711110    10.50000   -1.20000
AFIX   0
C17   1    0.299073    0.406500    0.679299    10.50000    0.03469    0.04176 =
         0.04632   -0.01557   -0.00561    0.00159
AFIX  23
H17A  2    0.356721    0.443580    0.743502    10.50000   -1.20000
H17B  2    0.367694    0.343714    0.623853    10.50000   -1.20000
AFIX   0

O11   5    0.389158    0.890404    0.889644    10.50000    0.03380    0.02840 =
         0.02457   -0.01221    0.00359   -0.00502
O12   5    0.134548    0.912319    0.950755    10.50000    0.03259    0.04877 =
         0.03945   -0.02856    0.00870   -0.00825
O13   5    0.231064    0.784756    0.761631    10.50000    0.02887    0.02896 =
         0.02804   -0.00852    0.00350   -0.00340
O14   5    0.456558    0.640655    0.854438    10.50000    0.03165    0.02543 =
         0.02558   -0.00530    0.00428   -0.00367
O15   5    0.666691    0.661837    0.692348    10.50000    0.03309    0.02507 =
         0.02845   -0.00435    0.00639   -0.00193
O16   5    0.456560    0.853323    0.648031    10.50000    0.02990    0.02750 =
         0.02188   -0.00406    0.00376   -0.00343
O17   5    0.282649    1.021595    1.070122    10.50000    0.03607    0.04399 =
         0.03845   -0.02595    0.00751   -0.00916
AFIX 147
H17   2    0.366319    1.045410    1.062549    10.50000   -1.50000
AFIX   0
O18   5   -0.021928    0.827363    0.810239    10.50000    0.03113    0.04175 =
         0.04056   -0.01962    0.00505   -0.00855
AFIX 147
H18   2   -0.083720    0.871980    0.861919    10.50000   -1.50000
AFIX   0
O19   5    0.667227    0.452475    0.883666    10.50000    0.03402    0.02897 =
         0.03481   -0.00176    0.00864   -0.00060
AFIX 147
H19   2    0.621735    0.419881    0.962080    10.50000   -1.50000
AFIX   0
O20   5    0.670145    0.858759    0.489121    10.50000    0.03392    0.02860 =
         0.03054   -0.00176    0.00621   -0.00125
AFIX 147
H20   2    0.616681    0.933498    0.440720    10.50000   -1.50000
AFIX   0
B11   3    0.379429    0.792080    0.788060    10.50000    0.03156    0.02603 =
         0.02176   -0.00839    0.00279   -0.00248
B12   3    0.271432    0.940448    0.969285    10.50000    0.03124    0.03048 =
         0.02884   -0.01125    0.00250   -0.00432
B13   3    0.115478    0.841569    0.841229    10.50000    0.02905    0.03016 =
         0.02822   -0.00663    0.00106   -0.00343
B14   3    0.593729    0.586070    0.814705    10.50000    0.03168    0.02944 =
         0.02322   -0.00931    0.00159   -0.00541
B15   3    0.595038    0.796880    0.610099    10.50000    0.03260    0.02675 =
         0.02393   -0.00858    0.00184   -0.00423

PART 1
N1    4    0.206601    0.583480    0.606676    10.50000    0.03100    0.04067 =
         0.03510   -0.01738    0.00015   -0.00047
N2    4   -0.005767    0.732339    0.515337    10.50000    0.02960    0.06557 =
         0.05403    0.01231   -0.00467    0.00210
AFIX  43
H2    2   -0.100537    0.759821    0.526539    10.50000   -1.20000
AFIX   0
N3    4   -0.019212    0.538248    0.711852    10.50000    0.02865    0.05752 =
         0.05525    0.00925    0.00991   -0.00150
AFIX  43
H3    2   -0.112580    0.573464    0.721950    10.50000   -1.20000
AFIX   0
C1    1    0.062326    0.616472    0.612715    10.50000    0.03655    0.04300 =
         0.02427   -0.02015    0.00361   -0.00183
C2    1    0.072499    0.813581    0.392083    10.50000    0.05843    0.07344 =
         0.10981    0.03022   -0.00282   -0.00368
AFIX  23
H2A   2    0.056909    0.777340    0.304078    10.50000   -1.20000
H2B   2    0.027698    0.920324    0.374635    10.50000   -1.20000
AFIX   0
C3    1    0.219530    0.804979    0.403310    10.50000    0.07392    0.08267 =
         0.06981    0.01884   -0.02293   -0.03689
AFIX  23
H3A   2    0.235108    0.892996    0.438848    10.50000   -1.20000
H3B   2    0.264861    0.814383    0.303223    10.50000   -1.20000
AFIX   0
C4    1    0.300475    0.669858    0.498838    10.50000    0.04517    0.05267 =
         0.04114   -0.02297    0.01071   -0.01641
AFIX  23
H4A   2    0.353960    0.604334    0.436244    10.50000   -1.20000
H4B   2    0.373570    0.700792    0.551888    10.50000   -1.20000
AFIX   0
C5    1    0.041511    0.393355    0.806390    10.50000    0.05387    0.06734 =
         0.06594   -0.00455    0.00007   -0.00347
AFIX  23
H5A   2   -0.017935    0.374858    0.899011    10.50000   -1.20000
H5B   2    0.038810    0.311583    0.755955    10.50000   -1.20000
AFIX   0
C6    1    0.186500    0.395943    0.837282    10.50000    0.06069    0.07102 =
         0.06850    0.01069   -0.02355   -0.01201
AFIX  23
H6A   2    0.232449    0.291578    0.877462    10.50000   -1.20000
H6B   2    0.183228    0.450873    0.916414    10.50000   -1.20000
AFIX   0
C7    1    0.284962    0.462156    0.716741    10.50000    0.03947    0.04715 =
         0.04593   -0.01920   -0.00670    0.00575
AFIX  23
H7A   2    0.360082    0.501475    0.759078    10.50000   -1.20000
H7B   2    0.335592    0.382820    0.667926    10.50000   -1.20000
AFIX   0
HKLF 4


REM  2019ncs0282_2b_a.res in P-1
REM wR2 = 0.1747, GooF = S = 1.076, Restrained GooF = 1.005 for all data
REM R1 = 0.0561 for 2429 Fo > 4sig(Fo) and 0.0616 for all 2836 data
REM 459 parameters refined using 1234 restraints

END

WGHT      0.1164      0.1587

REM Highest difference peak  0.349,  deepest hole -0.307,  1-sigma level  0.059
Q1    1   0.0621  0.8816  0.4602  11.00000  0.05    0.35
Q2    1  -0.0039  0.8970  0.3382  11.00000  0.05    0.34
Q3    1   0.0258  0.4784  0.8625  11.00000  0.05    0.31
Q4    1   0.3038  0.8587  0.3305  11.00000  0.05    0.28
Q5    1   0.3094  0.9173  0.6945  11.00000  0.05    0.27
;
_shelx_res_checksum                12018
_shelx_hkl_file
;
   0   0   1    1.85    0.30
   0   0   2    8.97    0.58
   0   0   2    8.48    0.75
   0   0   2    9.55    0.71
   0   0  -2    9.04    0.70
   0   0   3  791.05   37.23
   0   0  -4  340.23   16.22
   0   0  -4  318.02   16.16
   0   0   4  354.03   16.10
   0   0  -5  470.15   22.03
   0   0  -5  414.75   21.91
   0   0  -5  446.74   21.93
   0   0  -5  465.93   22.07
   0   0  -5  478.40   22.11
   0   0  -5  467.69   22.06
   0   0  -5  514.47   22.17
   0   0  -6   92.09    4.83
   0   0  -6   89.53    4.66
   0   0  -6   92.87    4.80
   0   0  -6   81.45    4.59
   0   0  -6   93.02    4.88
   0   0  -6   86.85    4.86
   0   0  -6   94.58    4.91
   0   0  -6   77.67    4.59
   0   0  -7   12.91    1.54
   0   0  -7   15.76    1.52
   0   0  -7   13.35    1.24
   0   0  -7   12.74    1.36
   0   0  -7   13.01    1.53
   0   0  -7   11.84    1.51
   0   0  -8   40.44    2.42
   0   0  -8   32.65    2.69
   0   0  -8   38.13    2.77
   0   0  -8   33.25    2.69
   0   0  -8   31.98    2.43
   0   0  -9   13.28    1.65
   0   0  -9   13.47    1.38
   0   0  -9   13.00    1.40
   0   0  -9   20.32    1.86
   0   0  -9   19.73    1.76
   0   0 -10   88.47    4.54
   0   0 -10   71.05    4.34
   0   1 -10    5.14    0.76
   0   1  -9   31.63    2.26
   0   1  -9   30.63    2.15
   0   1  -9   31.10    2.19
   0   1  -8    4.96    1.02
   0   1  -8    5.32    1.00
   0   1  -8    5.02    0.97
   0   1  -8    5.50    1.18
   0   1  -8    6.66    1.17
   0   1  -8    5.06    1.19
   0   1  -7  201.05    9.78
   0   1  -7  198.34    9.73
   0   1  -7  192.91    9.73
   0   1  -7  161.93    9.40
   0   1  -7  182.53    9.49
   0   1  -7  207.27    9.68
   0   1  -7  183.54    9.55
   0   1  -6   22.69    1.76
   0   1  -6   25.79    1.85
   0   1  -6   28.65    1.99
   0   1  -6   26.36    1.88
   0   1  -6   24.65    1.65
   0   1  -6   24.82    1.76
   0   1  -6   26.94    2.00
   0   1  -6   25.78    1.87
   0   1  -6   27.32    1.95
   0   1  -5   17.13    1.35
   0   1  -5   16.71    1.36
   0   1  -5   16.26    1.37
   0   1  -5   17.43    1.39
   0   1  -5   18.99    1.35
   0   1  -5   15.61    1.15
   0   1  -5   16.87    1.31
   0   1  -5   17.64    1.35
   0   1  -5   15.96    1.27
   0   1  -4   94.55    4.94
   0   1  -4   93.15    4.96
   0  -1   4   99.93    5.36
   0   1  -4  100.43    5.02
   0  -1   4  102.40    5.04
   0   1  -4   96.18    4.98
   0  -1   3  165.72    8.08
   0  -1   3  144.04    7.54
   0  -1   2 5438.47  254.51
   0   1   0   20.83    1.34
   0  -1   0   22.87    1.32
   0  -1  -1  883.60   41.57
   0  -1  -2  363.19   17.27
   0  -1  -2  356.13   17.64
   0  -1  -2  388.13   17.37
   0   1   2  352.50   17.67
   0  -1  -3    0.37    0.61
   0  -1  -4   64.78    3.53
   0  -1  -4   56.11    3.19
   0   1   4   62.05    3.66
   0  -1  -5   94.86    5.00
   0  -1  -5   95.17    5.05
   0  -1  -5   96.74    5.09
   0  -1  -5   90.66    4.92
   0  -1  -5   94.65    4.96
   0   1   5  100.87    5.39
   0  -1  -6   39.24    2.70
   0  -1  -6   41.33    2.66
   0  -1  -6   41.22    2.50
   0  -1  -6   38.83    2.62
   0  -1  -6   38.70    2.51
   0  -1  -7  292.42   15.43
   0  -1  -7  332.30   15.55
   0  -1  -7  305.64   15.25
   0  -1  -7  324.61   15.27
   0  -1  -7  294.33   15.48
   0  -1  -8   -0.05    1.01
   0  -1  -8    0.41    1.08
   0  -1  -8   -0.06    1.05
   0  -1  -8    0.13    0.78
   0  -1  -8    0.53    0.74
   0  -1  -9   32.68    2.24
   0  -1  -9   36.98    2.69
   0  -1  -9   33.73    2.53
   0  -1 -10    1.18    0.85
   0  -1 -11   24.60    1.72
   0   2  -9    6.93    0.88
   0   2  -9    6.12    0.89
   0   2  -8  178.67    9.92
   0   2  -8  194.40    9.96
   0   2  -8  192.92    9.98
   0   2  -8  215.08   10.12
   0   2  -8  192.10   10.11
   0   2  -8  179.13    9.88
   0   2  -8  217.72   10.01
   0   2  -8  206.51   10.22
   0   2  -7  167.23    8.21
   0   2  -7  143.65    7.94
   0   2  -7  138.47    8.02
   0   2  -7  153.55    7.95
   0   2  -7  150.40    7.94
   0   2  -7  164.27    8.10
   0   2  -7  152.86    7.99
   0   2  -7  149.67    7.97
   0   2  -7  156.12    8.03
   0   2  -7  150.89    7.87
   0   2  -6    3.16    0.93
   0   2  -6    4.17    0.91
   0   2  -6    3.36    0.95
   0   2  -6    1.84    0.82
   0   2  -6    2.67    0.92
   0   2  -6    5.33    1.08
   0   2  -6    1.67    0.83
   0   2  -6    1.95    0.75
   0   2  -6    3.24    0.87
   0   2  -5  196.79   10.01
   0   2  -5  206.25   10.17
   0   2  -5  204.35   10.20
   0   2  -5  206.19   10.16
   0   2  -5  201.03   10.15
   0   2  -5  216.37   10.18
   0   2  -5  202.90   10.13
   0   2  -5  196.92   10.16
   0   2  -4   -0.15    0.54
   0   2  -4    0.63    0.49
   0   2  -4    0.61    0.58
   0   2  -4    0.40    0.41
   0   2  -4    0.37    0.55
   0   2  -4    0.25    0.60
   0  -2   4    0.80    1.09
   0   2  -4    1.05    0.61
   0   2  -4    0.23    0.56
   0  -2   4    0.52    0.57
   0  -2   3  682.04   32.22
   0   2  -3  665.64   31.70
   0  -2   2 5866.46  259.20
   0   2  -2 5622.39  257.81
   0  -2   2 5143.08  258.23
   0  -2   0  103.90    5.40
   0   2   1  130.99    6.89
   0  -2  -1  133.60    6.86
   0  -2  -2  886.18   44.47
   0   2   2  858.89   44.37
   0  -2  -2 1008.43   44.07
   0  -2  -3  321.33   15.67
   0  -2  -3  326.59   16.27
   0  -2  -3  347.78   15.96
   0  -2  -4  493.39   22.24
   0  -2  -4  491.62   22.82
   0  -2  -4  437.20   22.12
   0  -2  -4  469.80   22.18
   0   2   4  477.89   22.94
   0  -2  -4  453.87   22.20
   0  -2  -5   53.09    3.14
   0   2   5   53.45    3.70
   0  -2  -5   45.80    3.40
   0  -2  -5   49.29    2.92
   0  -2  -5   47.67    2.90
   0  -2  -5   49.01    3.10
   0  -2  -5   49.41    3.00
   0  -2  -5   55.19    2.99
   0  -2  -6  493.41   24.68
   0  -2  -6  505.44   24.44
   0  -2  -6  537.95   24.53
   0  -2  -6  470.15   24.59
   0  -2  -6  531.80   24.49
   0  -2  -7    1.80    0.89
   0  -2  -7    0.43    1.01
   0  -2  -7    1.51    0.81
   0  -2  -7    1.12    0.84
   0  -2  -8   87.71    4.96
   0  -2  -8   89.40    4.86
   0  -2  -9    7.43    1.38
   0  -2  -9    4.98    0.97
   0  -2  -9    7.21    1.14
   0  -2  -9    6.86    1.41
   0  -2 -10    1.55    0.70
   0  -2 -11   18.52    1.42
   0  -2 -11   12.71    1.25
   0   3  -8   16.15    1.56
   0   3  -8   15.08    1.62
   0   3  -8   14.28    1.43
   0   3  -8   12.81    1.43
   0   3  -8   11.97    1.38
   0   3  -7   12.07    1.56
   0   3  -7   10.45    1.58
   0   3  -7   14.02    1.74
   0   3  -7    6.52    1.33
   0   3  -7   13.09    1.57
   0   3  -7   13.36    1.59
   0   3  -7   10.68    1.46
   0   3  -7    9.19    1.29
   0   3  -6   74.09    4.21
   0   3  -6   74.63    4.34
   0   3  -6   80.30    4.65
   0   3  -6   76.74    4.51
   0   3  -6   86.76    4.61
   0   3  -6   80.01    4.59
   0   3  -6   75.93    4.39
   0   3  -6   83.52    4.57
   0   3  -6   73.92    4.53
   0   3  -6   82.43    4.62
   0   3  -5  125.92    6.37
   0   3  -5  114.09    6.17
   0   3  -5  109.39    5.99
   0   3  -5  115.61    6.36
   0   3  -5  126.05    6.34
   0   3  -5  123.61    6.35
   0   3  -5  108.67    6.12
   0   3  -5  124.76    6.36
   0   3  -5  125.97    6.43
   0   3  -5  128.55    6.46
   0   3  -4  551.77   27.41
   0   3  -4  572.97   27.26
   0   3  -4  577.98   27.39
   0  -3   4  610.49   28.25
   0   3  -4  571.76   27.47
   0   3  -4  534.05   27.19
   0   3  -4  586.09   27.35
   0   3  -4  573.48   27.39
   0   3  -4  579.92   27.45
   0   3  -4  610.16   27.41
   0   3  -3 1213.79   56.33
   0   3  -3 1241.41   56.27
   0   3  -3 1123.63   56.30
   0   3  -3 1156.65   56.27
   0  -3   3 1259.87   57.15
   0   3  -3 1211.03   56.31
   0  -3   2  291.26   13.73
   0   3  -2  263.74   13.72
   0   3  -2  278.37   13.73
   0   3  -2  315.00   14.07
   0  -3   2  285.67   14.48
   0   3  -2  277.46   13.74
   0  -3   1 1185.11   56.41
   0  -3   1 1149.51   56.80
   0   3  -1 1202.50   56.59
   0  -3   1 1314.35   58.17
   0   3   0  629.93   30.44
   0  -3   0  615.57   30.47
   0  -3   0  648.08   30.32
   0  -3  -1    1.49    0.96
   0  -3  -2  336.61   15.95
   0  -3  -2  302.99   15.56
   0  -3  -2  319.44   16.40
   0  -3  -3  593.91   28.92
   0  -3  -3  622.47   29.10
   0  -3  -3  593.75   28.37
   0   3   3  565.02   28.98
   0  -3  -4  125.86    5.84
   0  -3  -4  105.16    5.87
   0  -3  -4  120.20    6.77
   0  -3  -4  113.00    5.81
   0   3   4  124.56    6.98
   0  -3  -4  107.68    5.83
   0  -3  -4  117.25    5.93
   0  -3  -4  116.39    5.92
   0  -3  -4  106.48    5.89
   0  -3  -4  126.62    6.17
   0  -3  -5   23.43    1.62
   0  -3  -5   21.06    1.63
   0  -3  -5   19.34    1.63
   0  -3  -5   17.05    2.10
   0   3   5   18.38    2.35
   0  -3  -5   20.57    1.64
   0  -3  -5   20.17    1.59
   0  -3  -5   19.11    1.49
   0  -3  -6   48.50    2.96
   0  -3  -6   51.05    3.03
   0  -3  -6   48.50    3.06
   0  -3  -6   46.33    3.13
   0  -3  -7  117.20    6.41
   0  -3  -7  118.89    6.39
   0  -3  -7  120.39    6.60
   0  -3  -7  112.97    6.36
   0  -3  -8   28.58    2.29
   0  -3  -8   26.10    2.24
   0  -3  -8   28.55    2.56
   0   3   9    1.82    0.95
   0  -3  -9    2.01    0.89
   0  -3  -9    4.40    1.16
   0  -3  -9    3.30    1.17
   0  -3 -10    1.96    0.80
   0  -3 -10    0.66    0.67
   0  -3 -10    2.15    0.98
   0  -3 -11    0.62    0.64
   0   4  -8    0.16    0.74
   0   4  -8    0.31    0.73
   0   4  -8    1.01    0.70
   0   4  -8    1.00    0.67
   0   4  -7    1.08    0.92
   0   4  -7    1.84    0.91
   0   4  -7    2.71    0.98
   0   4  -7    1.31    0.79
   0   4  -7    1.30    0.93
   0   4  -6 1061.54   48.05
   0   4  -6 1013.02   47.84
   0   4  -6 1034.94   47.93
   0   4  -6 1088.32   47.97
   0   4  -6  940.24   47.83
   0   4  -6 1037.77   48.08
   0   4  -6  897.98   47.84
   0   4  -5   23.83    2.08
   0   4  -5   24.55    1.81
   0   4  -5   29.43    2.15
   0   4  -5   28.38    2.25
   0   4  -5   27.21    2.27
   0   4  -5   23.58    2.08
   0   4  -5   31.27    2.22
   0   4  -5   26.68    2.07
   0   4  -4 1348.98   66.82
   0   4  -4 1359.46   67.12
   0   4  -4 1481.29   67.27
   0   4  -4 1406.49   67.19
   0   4  -4 1454.90   67.06
   0   4  -4 1459.74   67.12
   0   4  -4 1498.98   67.22
   0   4  -3 1762.30   80.33
   0   4  -3 1682.23   80.37
   0   4  -3 1768.59   80.30
   0   4  -3 1677.89   80.27
   0  -4   3 1723.26   81.47
   0   4  -3 1681.95   80.40
   0   4  -3 1686.02   80.39
   0   4  -3 1677.88   80.34
   0   4  -2  478.92   22.66
   0  -4   2  469.15   23.69
   0   4  -2  459.97   22.62
   0  -4   2  497.83   22.77
   0   4  -2  471.96   22.77
   0   4  -2  457.47   22.65
   0   4  -2  508.76   23.22
   0   4  -2  446.61   22.66
   0   4  -2  481.57   22.76
   0  -4   1  100.72    6.97
   0   4  -1   80.01    4.55
   0   4  -1   78.74    4.55
   0   4  -1   82.11    4.46
   0   4  -1   81.11    4.61
   0   4  -1   92.80    5.25
   0   4  -1   81.71    4.47
   0   4  -1   87.04    4.52
   0   4  -1   86.18    4.49
   0  -4   1   90.42    4.94
   0  -4   1   83.74    5.34
   0   4   0 1058.72   50.00
   0   4   0 1087.83   49.96
   0   4   0 1017.16   49.86
   0   4   0 1087.34   50.82
   0  -4   0 1105.40   50.60
   0  -4   0 1043.95   50.78
   0   4   1   42.95    3.38
   0  -4  -1   44.47    3.24
   0  -4  -1   44.55    2.70
   0   4   1   41.38    2.63
   0   4   1   44.76    2.63
   0   4   2  358.65   17.56
   0  -4  -2  359.46   16.43
   0  -4  -2  325.88   16.38
   0   4   2  309.40   16.39
   0  -4  -2  346.51   17.06
   0  -4  -2  390.96   17.50
   0   4   2  338.17   16.44
   0  -4  -3   85.12    4.52
   0  -4  -3   88.47    4.49
   0   4   3   77.44    4.65
   0   4   3   85.73    4.63
   0   4   3   90.35    5.78
   0  -4  -3   92.96    4.69
   0  -4  -4  153.28    8.51
   0   4   4  155.57    7.51
   0   4   4  145.11    8.83
   0  -4  -4  143.94    7.44
   0  -4  -4  147.92    7.36
   0  -4  -4  143.82    7.76
   0  -4  -4  144.22    7.59
   0  -4  -4  144.56    7.54
   0  -4  -4  156.38    7.57
   0   4   4  143.03    7.64
   0  -4  -5   62.52    3.67
   0  -4  -5   65.65    3.68
   0  -4  -5   63.88    3.68
   0   4   5   67.86    3.83
   0  -4  -5   64.69    3.51
   0   4   5   60.67    4.89
   0  -4  -5   50.25    3.58
   0  -4  -5   60.04    3.55
   0  -4  -6    4.52    1.04
   0  -4  -6    4.91    1.05
   0  -4  -6    3.86    0.93
   0  -4  -6    4.37    0.90
   0  -4  -6    3.41    0.92
   0   4   6    5.26    1.14
   0  -4  -7    0.17    0.99
   0  -4  -7    0.54    0.72
   0   4   7   -0.17    0.94
   0  -4  -7    0.72    0.91
   0  -4  -7    0.14    0.79
   0   4   8    0.41    1.01
   0  -4  -8    1.22    1.00
   0  -4  -8    0.56    0.99
   0  -4  -9    3.55    1.12
   0  -4  -9    1.95    1.03
   0   4   9    2.97    0.99
   0  -4  -9    1.97    0.88
   0  -4 -10    1.88    0.72
   0  -4 -10    3.84    0.93
   0  -4 -10    2.65    0.96
   0  -4 -11    4.53    0.70
   0  -4 -11    4.28    0.80
   0   5  -8    6.25    0.89
   0   5  -8    8.02    1.05
   0   5  -8    7.57    0.98
   0   5  -7    0.45    0.84
   0   5  -7    0.29    0.64
   0   5  -7    0.97    0.88
   0   5  -7    0.04    0.79
   0   5  -7   -0.22    0.75
   0   5  -6   13.83    1.60
   0   5  -6   15.24    1.66
   0   5  -6   21.99    1.94
   0   5  -6   20.81    2.12
   0   5  -6   19.42    1.82
   0   5  -6   24.22    2.14
   0   5  -6   21.36    1.78
   0   5  -5 2737.89  124.68
   0   5  -5 2644.07  124.43
   0   5  -5 2820.74  124.66
   0   5  -5 2384.45  124.39
   0   5  -5 2550.09  124.31
   0   5  -5 2838.96  124.53
   0   5  -4    6.98    1.66
   0   5  -4    9.22    1.38
   0   5  -4    4.96    1.00
   0   5  -4    8.09    1.40
   0   5  -4    6.85    1.41
   0   5  -3   10.24    1.39
   0   5  -3    8.39    1.20
   0   5  -3    7.28    1.29
   0   5  -3    9.44    1.40
   0   5  -3    8.10    1.37
   0   5  -3    6.19    1.17
   0   5  -2  310.64   15.48
   0   5  -2  310.46   15.56
   0   5  -2  308.95   15.62
   0   5  -2  347.54   15.53
   0   5  -2  308.12   15.43
   0   5  -2  315.02   16.17
   0   5  -2  300.54   15.55
   0   5  -2  313.27   15.63
   0   5  -1  297.25   15.35
   0   5  -1  332.35   15.21
   0   5  -1  332.92   15.27
   0  -5   1  284.50   16.31
   0   5  -1  305.51   15.17
   0   5  -1  306.51   15.20
   0   5  -1  315.26   15.34
   0   5  -1  289.34   15.32
   0   5   0   48.66    3.82
   0  -5   0   41.66    2.67
   0  -5   0   49.31    3.00
   0   5   0   47.39    2.77
   0   5   0   44.42    2.84
   0  -5   0   49.94    3.53
   0   5   0   42.46    2.71
   0  -5  -1  208.24   10.64
   0   5   1  213.59   10.79
   0   5   1  202.20   10.51
   0   5   1  222.41   10.84
   0   5   1  221.52   10.55
   0  -5  -1  204.10   11.63
   0   5   1  224.18   12.01
   0   5   1  222.90   10.72
   0   5   1  205.06   10.46
   0  -5  -1  222.45   10.80
   0   5   1  223.36   10.77
   0   5   2    3.73    1.53
   0   5   2    2.91    0.59
   0   5   2    3.86    0.92
   0  -5  -2    3.20    1.08
   0  -5  -2    6.20    1.06
   0  -5  -2    3.82    0.89
   0   5   2    4.81    0.95
   0   5   3   68.65    4.01
   0   5   3   78.50    5.44
   0  -5  -3   71.75    4.03
   0   5   3   68.33    4.04
   0  -5  -3   68.29    3.72
   0  -5  -3   62.13    3.74
   0  -5  -3   81.31    4.07
   0  -5  -3   66.63    3.78
   0  -5  -4  101.61    6.87
   0  -5  -4  101.56    5.24
   0   5   4  107.87    5.48
   0   5   4   93.84    5.51
   0  -5  -4   91.47    5.82
   0  -5  -4   93.49    5.08
   0  -5  -4  103.57    5.35
   0   5   5  129.71    7.05
   0  -5  -5  130.89    6.91
   0  -5  -5  125.46    6.78
   0  -5  -5  133.24    7.02
   0  -5  -6    8.36    1.10
   0   5   6    9.70    1.52
   0  -5  -6   10.14    1.41
   0  -5  -6   11.86    1.37
   0  -5  -6   11.80    1.51
   0  -5  -7    0.30    0.95
   0  -5  -7    0.66    0.81
   0  -5  -7    0.05    0.85
   0  -5  -7    0.11    0.97
   0   5   7    0.06    1.01
   0  -5  -8    0.77    0.91
   0  -5  -8    1.76    0.88
   0  -5  -8    2.06    1.14
   0  -5  -8    3.00    1.19
   0   5   8    3.27    1.19
   0  -5  -9    3.69    1.04
   0  -5  -9    4.06    1.14
   0  -5  -9    6.55    1.13
   0   5   9    4.18    1.09
   0  -5 -10    1.72    0.69
   0  -5 -10    2.47    0.81
   0   6  -7    0.81    0.64
   0   6  -7    2.38    0.90
   0   6  -7    0.48    0.76
   0   6  -7    0.58    0.70
   0   6  -6   88.04    5.03
   0   6  -6   80.71    4.69
   0   6  -6   83.84    4.78
   0   6  -6   76.57    4.93
   0   6  -6   78.39    4.53
   0   6  -5   25.71    2.08
   0   6  -5   24.98    2.16
   0   6  -5   25.12    2.48
   0   6  -4    2.05    1.28
   0   6  -4    2.40    1.67
   0   6  -4    2.20    1.34
   0   6  -4    0.83    0.86
   0   6  -4   -0.12    1.35
   0   6  -4    2.77    1.12
   0   6  -3    2.74    1.06
   0   6  -3    2.79    1.08
   0   6  -3    3.30    1.27
   0   6  -3    3.14    1.17
   0   6  -3    2.37    1.08
   0   6  -2    7.17    1.16
   0   6  -2    6.47    1.25
   0   6  -2    7.29    1.14
   0   6  -2    5.75    1.20
   0  -6   2    7.53    1.39
   0   6  -2    5.88    1.41
   0   6  -1    1.27    0.86
   0   6  -1    2.20    0.95
   0   6  -1    1.38    1.13
   0   6  -1    2.19    0.86
   0  -6   1    2.82    1.14
   0   6  -1    1.62    0.82
   0   6  -1    1.97    0.93
   0  -6   0   71.22    4.12
   0   6   0   72.35    4.21
   0   6   0   59.82    5.28
   0   6   0   77.17    4.20
   0  -6   0   73.14    4.38
   0   6   0   77.51    4.38
   0   6   1    0.88    0.81
   0   6   1    0.52    0.64
   0   6   1    0.90    0.50
   0  -6  -1    0.95    0.75
   0   6   1   -0.13    1.32
   0   6   1    1.26    1.04
   0   6   1    1.19    0.94
   0   6   2  530.23   24.21
   0  -6  -2  491.87   24.07
   0   6   2  440.32   23.71
   0   6   2  515.41   24.07
   0  -6  -2  538.01   24.15
   0   6   2  522.36   24.30
   0  -6  -3   32.52    2.06
   0  -6  -3   29.26    2.17
   0   6   3   30.27    2.45
   0   6   3   34.56    2.55
   0  -6  -3   36.15    2.48
   0  -6  -3   33.07    2.46
   0  -6  -3   31.65    2.13
   0  -6  -4    2.44    0.67
   0  -6  -4    2.88    1.05
   0  -6  -4    2.00    0.77
   0  -6  -4    4.08    1.08
   0  -6  -4    3.45    0.77
   0   6   4    3.07    1.11
   0   6   4    2.45    0.97
   0   6   5    7.73    1.22
   0  -6  -5    7.34    1.15
   0   6   5    6.74    1.39
   0  -6  -5    8.53    1.17
   0  -6  -6  109.11    6.33
   0  -6  -6  109.89    5.86
   0   6   6  113.04    6.42
   0  -6  -6  110.14    6.10
   0  -6  -7   70.10    4.07
   0  -6  -7   63.89    4.36
   0  -6  -7   69.66    4.43
   0   6   7   71.36    4.52
   0  -6  -7   72.77    4.31
   0   6   8    0.06    1.02
   0  -6  -8    0.83    1.01
   0  -6  -8    0.21    0.99
   0  -6  -8    0.34    0.81
   0  -6  -8    1.05    0.78
   0   6   9    0.59    0.83
   0  -6  -9    0.52    0.91
   0  -6  -9    0.13    0.79
   0  -6  -9   -0.27    0.66
   0  -6 -10    1.82    0.64
   0  -6 -10    2.66    0.65
   0  -6 -10    2.52    0.81
   0   7  -6  102.22    5.01
   0   7  -6  111.31    5.39
   0   7  -6  108.81    5.16
   0   7  -5    0.34    0.68
   0   7  -5   -0.17    0.78
   0   7  -4    2.19    1.05
   0   7  -4    2.35    0.94
   0  -7   4    3.22    0.96
   0   7  -4    1.00    1.19
   0   7  -4    2.73    1.09
   0   7  -3   94.44    5.18
   0   7  -3   72.97    4.90
   0   7  -3   88.54    5.19
   0   7  -3   89.32    5.31
   0   7  -3   85.97    5.50
   0   7  -2    1.21    1.51
   0   7  -2    0.82    1.16
   0   7  -2   -0.66    1.07
   0  -7   2    2.50    1.24
   0   7  -2    0.83    1.21
   0   7  -2    1.64    1.20
   0   7  -1   10.50    1.50
   0   7  -1    8.52    1.68
   0   7  -1    9.22    1.32
   0   7  -1    8.22    1.40
   0   7  -1    7.93    1.38
   0  -7   1   10.07    1.58
   0   7  -1    9.21    1.62
   0   7   0   13.65    1.50
   0   7   0   15.25    1.62
   0   7   0   13.54    1.65
   0  -7   0   15.65    1.47
   0   7   0   12.69    1.88
   0   7   1  280.91   14.27
   0   7   1  281.29   14.00
   0   7   1  279.61   13.85
   0  -7  -1  279.17   13.89
   0   7   1  254.46   13.68
   0  -7  -1  295.41   14.05
   0  -7  -2   -0.46    1.01
   0   7   2    0.35    0.96
   0   7   2   -0.03    0.53
   0   7   2    0.06    1.15
   0   7   2   -0.11    1.11
   0   7   2    0.14    0.61
   0  -7  -3   28.13    2.45
   0   7   3   26.12    2.46
   0   7   3   29.27    2.55
   0  -7  -3   22.11    2.00
   0  -7  -3   26.78    2.43
   0  -7  -4    0.28    0.62
   0   7   4   -0.66    1.00
   0   7   4    0.42    1.15
   0   7   4    0.12    1.02
   0  -7  -4    0.44    0.63
   0  -7  -4    0.47    1.15
   0  -7  -4   -0.98    0.69
   0  -7  -4    0.43    1.16
   0  -7  -5    3.56    0.93
   0  -7  -5    4.40    0.93
   0   7   5    4.06    1.10
   0  -7  -5    3.55    1.27
   0   7   5    4.18    1.30
   0   7   5    2.93    1.02
   0  -7  -6   84.18    5.00
   0   7   6   71.35    4.82
   0  -7  -6   79.08    4.63
   0  -7  -7   62.19    4.24
   0  -7  -7   72.16    4.17
   0  -7  -7   69.27    4.35
   0   7   7   63.52    4.29
   0   7   8    4.09    1.15
   0  -7  -8    2.26    1.11
   0  -7  -8    4.09    1.03
   0  -7  -8    3.25    1.02
   0  -7  -9    5.83    1.08
   0   7   9    4.46    0.97
   0  -7 -10    0.91    0.57
   0   8  -5   36.03    2.34
   0   8  -5   40.40    2.54
   0   8  -5   44.78    2.65
   0   8  -5   44.53    2.90
   0   8  -4   11.24    1.54
   0   8  -4   11.66    1.35
   0   8  -4    9.68    1.24
   0   8  -4    9.69    1.16
   0   8  -3   -0.05    0.88
   0   8  -3    1.72    1.39
   0  -8   3    0.94    0.82
   0   8  -3    1.43    0.96
   0   8  -3    0.61    0.78
   0   8  -3    0.66    1.09
   0   8  -2   47.05    3.43
   0   8  -2   49.71    3.49
   0   8  -2   43.06    3.17
   0  -8   2   41.89    3.10
   0   8  -2   53.98    3.29
   0   8  -1   21.15    2.14
   0   8  -1   22.97    2.41
   0   8  -1   23.23    2.26
   0  -8   1   22.33    2.13
   0   8  -1   23.66    2.28
   0   8  -1   21.10    1.99
   0   8   0    9.97    1.61
   0  -8   0    9.31    1.54
   0   8   0    8.19    1.23
   0   8   0    7.13    1.48
   0   8   0    8.20    1.43
   0  -8  -1    3.52    0.99
   0   8   1    4.33    1.51
   0   8   1    4.24    1.29
   0   8   1    3.99    1.09
   0  -8  -1    2.66    1.29
   0   8   1    3.66    0.92
   0  -8  -2    9.79    1.64
   0   8   2    7.19    1.60
   0   8   2    7.16    1.48
   0  -8  -2    8.19    1.42
   0   8   2   12.76    1.93
   0  -8  -2   10.32    1.54
   0   8   3   36.94    2.96
   0  -8  -3   31.53    2.50
   0   8   3   32.78    2.78
   0  -8  -3   41.99    2.99
   0  -8  -3   47.99    3.13
   0   8   4    9.18    1.66
   0   8   4   10.46    1.48
   0  -8  -4   12.97    1.79
   0   8   4   13.99    1.80
   0  -8  -4   10.89    1.70
   0  -8  -4    7.34    1.07
   0   8   4    8.89    1.12
   0   8   5    2.12    1.10
   0  -8  -5    2.05    1.37
   0   8   5    1.55    1.19
   0   8   5    1.27    0.96
   0  -8  -5    1.71    1.26
   0   8   6    0.95    1.08
   0   8   6    0.41    0.81
   0  -8  -6    0.67    0.67
   0  -8  -7    2.99    0.89
   0   8   7    2.95    1.10
   0   8   7    2.99    0.84
   0  -8  -7    3.59    1.15
   0  -8  -8    0.85    0.80
   0  -8  -8    0.22    0.66
   0  -8  -8   -0.04    0.78
   0   8   8    0.75    0.80
   0  -8  -9    0.60    0.61
   0   8   9    0.42    0.51
   0  -8  -9   -0.03    0.53
   0   9  -4    1.27    0.57
   0   9  -4    0.74    0.52
   0   9  -4    0.55    0.73
   0   9  -3    2.50    0.70
   0   9  -3    2.32    0.77
   0   9  -3    2.50    0.81
   0   9  -3    1.93    0.99
   0   9  -2    5.35    1.29
   0   9  -2    4.96    1.03
   0   9  -2    6.72    1.05
   0  -9   2    3.74    0.89
   0   9  -2    5.51    1.18
   0   9  -1    0.89    1.17
   0   9  -1    0.77    0.82
   0   9  -1    0.61    1.08
   0   9  -1    0.23    0.93
   0   9  -1    0.45    1.03
   0  -9   0    2.26    1.14
   0   9   0    4.63    0.97
   0   9   0    3.56    1.29
   0   9   0    2.56    1.54
   0   9   0    3.23    1.31
   0   9   0    2.93    1.14
   0   9   1    1.01    1.15
   0  -9  -1   -0.21    1.13
   0  -9  -1    1.21    1.08
   0   9   1    0.43    1.40
   0  -9  -1   -0.70    0.92
   0   9   1   -0.11    0.68
   0  -9  -2    0.53    1.10
   0   9   2    0.29    1.44
   0  -9  -2    0.35    0.85
   0   9   2    0.06    1.12
   0  -9  -2    1.13    0.99
   0   9   2    0.26    1.09
   0  -9  -3    8.60    1.43
   0  -9  -3    8.18    1.43
   0   9   3    8.81    1.69
   0   9   3    7.03    1.30
   0   9   3    7.81    1.45
   0  -9  -3    4.92    0.99
   0   9   4    4.51    1.31
   0  -9  -4    3.50    1.26
   0   9   4    4.16    1.13
   0  -9  -4    2.92    0.72
   0   9   4    3.33    1.26
   0  -9  -4    4.78    1.30
   0   9   5   25.43    2.21
   0  -9  -5   20.45    2.04
   0   9   5   18.71    1.82
   0   9   5   20.19    2.08
   0  -9  -5   27.45    2.29
   0  -9  -6   -0.59    1.05
   0   9   6   -0.44    0.67
   0   9   6   -0.14    0.92
   0  -9  -6    0.56    0.93
   0  -9  -7    0.59    0.78
   0   9   7    0.60    0.81
   0  -9  -8    2.13    0.74
   0  -9  -8    2.76    0.68
   0   9   8    2.52    0.66
   0  10  -2    1.62    0.51
   0  10  -2    1.69    0.52
   0  10  -1    0.41    0.83
   0  10  -1   -0.55    0.62
   0  10  -1   -0.07    0.67
   0  10  -1    0.38    0.50
   0 -10   1    0.07    0.70
   0 -10   0    7.14    1.03
   0  10   0    7.98    1.17
   0 -10   0    7.76    1.14
   0  10   0    9.18    1.22
   0  10   1    7.57    1.40
   0  10   1    3.61    1.00
   0 -10  -1    4.48    0.93
   0 -10  -1    4.10    0.97
   0  10   1    6.80    1.12
   0  10   2   -0.48    1.09
   0 -10  -2    0.54    0.65
   0 -10  -2    0.28    0.58
   0  10   2   -0.78    0.81
   0 -10  -2    0.08    0.81
   0 -10  -3    0.33    0.79
   0  10   3   -0.64    1.05
   0  10   3    0.04    0.71
   0 -10  -3   -0.04    0.71
   0  10   3    1.09    0.85
   0 -10  -3   -0.07    0.48
   0  10   4    6.42    1.13
   0  10   4    8.65    1.35
   0  10   4    4.91    0.96
   0 -10  -4    9.35    1.27
   0 -10  -4    6.99    1.14
   0  10   5    2.40    0.75
   0  10   5    3.09    0.96
   0 -10  -5    3.39    1.01
   0  10   5    3.45    0.97
   0 -10  -5    4.43    1.07
   0 -10  -6    0.95    0.76
   0  10   6    0.75    0.67
   0 -10  -6    1.58    0.75
   0  11   2    5.80    0.99
   0  11   2    2.44    0.63
   0 -11  -3    0.52    0.50
   0  11   3    0.69    0.47
   0  11   3    1.20    0.72
  -1  10   6    2.94    0.69
   1 -10  -6    3.86    0.85
   1 -10  -6    4.60    0.88
   1 -10  -5    5.64    1.06
   1 -10  -5    7.82    1.16
  -1  10   5    6.10    1.03
   1 -10  -4    2.10    0.82
  -1  10   4    0.55    0.80
   1 -10  -4    0.32    0.75
  -1  10   4    0.79    0.95
  -1  10   4    0.52    0.56
   1 -10  -3    0.23    0.53
  -1  10   3    1.45    0.66
  -1  10   3    1.78    1.08
   1 -10  -3    2.41    0.82
  -1  10   3    1.88    0.86
   1 -10  -3    2.64    0.79
   1 -10  -2    0.33    0.58
  -1  10   2    0.52    1.06
   1 -10  -2   -0.30    0.71
  -1  10   2    0.59    0.84
  -1  10   2    0.03    0.70
   1 -10  -1    1.16    0.72
  -1  10   1    1.02    0.80
  -1  10   1    1.24    1.06
  -1  10   1    1.70    0.74
   1 -10  -1    1.26    0.62
  -1  10   0    8.40    1.07
  -1  10   0    9.71    1.37
  -1  10  -1    5.38    0.87
  -1  10  -1    7.33    1.15
  -1  10  -1    7.04    0.91
   1  -9  -8   -0.16    0.51
  -1   9   7    0.93    0.49
  -1   9   7    0.53    0.60
   1  -9  -7    2.03    0.83
   1  -9  -6    0.88    0.92
  -1   9   6    0.18    0.52
   1  -9  -6    0.94    0.95
  -1   9   6    1.03    0.78
   1  -9  -5    4.21    1.32
  -1   9   5    2.56    0.71
  -1   9   5    4.47    1.19
   1  -9  -5    3.64    1.26
  -1   9   5    2.18    1.16
  -1   9   5    3.39    0.86
  -1   9   4    5.20    1.43
   1  -9  -4    5.63    1.34
  -1   9   4    4.55    0.99
   1  -9  -4    3.88    0.85
  -1   9   4    5.34    1.23
   1  -9  -4    4.77    1.20
  -1   9   3    0.16    1.19
  -1   9   3    0.72    0.93
  -1   9   3   -0.07    1.43
   1  -9  -3    0.43    1.07
   1  -9  -3    0.10    1.10
   1  -9  -3    1.05    0.92
  -1   9   2    2.22    1.51
  -1   9   2    1.95    1.06
   1  -9  -2    4.56    1.17
   1  -9  -2    3.33    1.11
  -1   9   2    3.02    1.27
   1  -9  -2    4.98    1.22
  -1   9   1   12.37    1.70
   1  -9  -1   11.54    1.59
  -1   9   1   16.25    2.11
  -1   9   1   15.49    1.66
   1  -9  -1   14.25    1.45
   1  -9  -1   12.74    1.50
  -1   9   0   48.77    3.14
   1  -9   0   43.83    2.89
  -1   9   0   42.87    2.75
  -1   9  -1   12.62    1.28
  -1   9  -1   12.52    1.51
  -1   9  -1   13.30    1.80
   1  -9   2    5.19    1.29
  -1   9  -2    8.66    1.37
  -1   9  -2    9.74    1.25
  -1   9  -2    8.10    1.06
  -1   9  -2    5.87    1.11
  -1   9  -2    8.37    1.41
  -1   9  -3    2.19    0.76
  -1   9  -3    2.63    0.70
  -1   9  -3    1.73    0.67
   1  -9   3    1.08    0.85
  -1   9  -4    1.12    0.55
   1  -9   4    0.52    0.53
   1  -8  -9   -0.12    0.46
   1  -8  -9    0.14    0.53
   1  -8  -8    0.78    0.72
  -1   8   8    1.04    0.62
   1  -8  -8    0.84    0.65
   1  -8  -7    0.84    0.97
   1  -8  -7    2.68    0.82
  -1   8   7    1.94    0.86
   1  -8  -7    0.69    1.00
  -1   8   6    2.64    1.06
   1  -8  -6    1.80    0.77
   1  -8  -6    2.91    1.15
  -1   8   5    3.04    0.90
   1  -8  -5    1.82    1.19
  -1   8   5    1.20    0.78
  -1   8   5    3.27    1.17
  -1   8   5    1.70    1.11
   1  -8  -5    2.27    1.26
   1  -8  -5    1.16    0.65
  -1   8   4   12.20    1.91
  -1   8   4   11.70    1.89
  -1   8   4   11.06    1.57
  -1   8   4   10.31    1.39
   1  -8  -4   11.83    1.90
   1  -8  -4    8.86    1.36
   1  -8  -4    9.71    1.95
  -1   8   3  146.86    7.93
  -1   8   3  171.61    8.41
  -1   8   3  136.89    7.63
  -1   8   3  116.50    7.28
   1  -8  -3  129.14    7.47
   1  -8  -3  155.76    7.85
   1  -8  -3  168.10    8.05
   1  -8  -2    0.89    1.13
  -1   8   2    1.49    1.21
   1  -8  -2    1.30    1.07
   1  -8  -2    1.43    1.08
  -1   8   2    0.81    1.36
  -1   8   2    0.88    1.04
   1  -8  -1   18.42    1.83
  -1   8   1   13.08    1.37
   1  -8  -1   11.74    1.86
   1  -8  -1   16.89    1.71
  -1   8   1   14.03    1.75
  -1   8   1   16.27    1.97
  -1   8   1   19.84    2.29
  -1   8   0   26.69    2.44
  -1   8   0   26.96    2.46
   1  -8   0   23.23    2.10
  -1   8   0   23.42    2.29
  -1   8   0   25.58    2.02
  -1   8  -1   59.61    3.72
  -1   8  -1   58.20    3.92
  -1   8  -1   64.51    4.35
  -1   8  -1   60.57    4.14
  -1   8  -2    3.10    1.13
  -1   8  -2    4.03    1.01
  -1   8  -2    4.01    1.19
  -1   8  -2    3.94    1.29
  -1   8  -2    2.88    1.36
  -1   8  -3    1.57    0.88
  -1   8  -3    1.36    0.95
  -1   8  -3    1.10    0.95
  -1   8  -3    1.07    0.87
  -1   8  -3    1.37    1.26
  -1   8  -4    7.36    1.10
  -1   8  -4    7.85    1.45
  -1   8  -4    5.82    1.02
  -1   8  -5   44.72    2.89
  -1   8  -5   60.31    3.16
  -1   8  -5   55.35    3.35
  -1   8  -5   48.51    3.01
   1  -7  -9    0.82    0.73
   1  -7  -9    0.63    0.73
  -1   7   8    2.91    0.86
   1  -7  -8    2.99    0.97
   1  -7  -8    2.13    0.88
   1  -7  -7    3.08    1.02
   1  -7  -7    1.63    1.11
  -1   7   7    0.94    0.91
   1  -7  -6    7.38    1.52
  -1   7   6    3.32    0.90
   1  -7  -6    5.65    1.42
   1  -7  -6    5.43    1.15
  -1   7   6    4.92    1.25
   1  -7  -5    3.04    0.80
  -1   7   5    3.86    1.25
   1  -7  -5    4.29    1.37
  -1   7   5    3.28    1.17
   1  -7  -5    3.82    1.35
   1  -7  -5    3.36    0.94
  -1   7   5    4.21    0.97
   1  -7  -4   58.87    3.56
  -1   7   4   63.13    4.04
   1  -7  -4   62.68    4.19
   1  -7  -4   51.91    3.58
   1  -7  -4   69.27    4.11
  -1   7   4   63.56    4.16
  -1   7   4   55.56    3.71
   1  -7  -3    0.73    1.18
  -1   7   3    1.42    0.94
  -1   7   3    2.05    0.87
   1  -7  -3    0.56    0.90
  -1   7   3    1.97    1.24
   1  -7  -3    2.46    1.21
  -1   7   3    2.34    1.33
  -1   7   2   30.59    2.57
  -1   7   2   22.52    1.92
   1  -7  -2   28.32    2.26
   1  -7  -2   21.52    2.10
   1  -7  -2   25.52    2.22
  -1   7   2   26.92    2.33
  -1   7   2   25.06    2.15
  -1   7   1    0.11    0.59
   1  -7  -1    0.38    0.86
  -1   7   1    0.95    1.03
  -1   7   1   -0.16    1.07
  -1   7   1   -0.20    1.22
  -1   7   1   -0.17    0.59
  -1   7   1    0.05    0.91
  -1   7   0    9.95    1.50
   1  -7   0    9.34    1.22
  -1   7   0   10.91    1.26
   1  -7   0    9.18    1.35
  -1   7   0   10.15    1.55
  -1   7   0   11.61    1.54
  -1   7  -1   13.98    1.86
  -1   7  -1   16.93    2.00
  -1   7  -1   15.84    1.60
   1  -7   1   13.28    1.58
  -1   7  -1   16.04    1.79
  -1   7  -2    4.22    1.27
  -1   7  -2    2.37    1.01
  -1   7  -2    3.73    1.25
  -1   7  -2    0.29    1.38
   1  -7   2    2.32    0.96
  -1   7  -2    3.20    1.28
  -1   7  -3    3.74    1.15
  -1   7  -3    1.84    1.47
  -1   7  -3    3.33    1.32
  -1   7  -3    1.78    1.17
  -1   7  -3    5.08    1.48
  -1   7  -4   18.68    1.83
  -1   7  -4   18.79    2.14
  -1   7  -4   20.70    1.90
  -1   7  -4   16.82    2.18
  -1   7  -5   91.06    5.42
  -1   7  -5   92.37    5.36
  -1   7  -6   54.88    3.24
  -1   7  -6   57.46    3.63
  -1   7  -6   57.99    3.40
   1  -6 -10    8.25    1.07
   1  -6 -10   10.34    1.01
   1  -6  -9   11.80    1.45
   1  -6  -9   11.35    1.45
   1  -6  -9   11.07    1.24
   1  -6  -8    2.94    1.10
  -1   6   8    4.26    1.05
   1  -6  -8    3.62    1.26
   1  -6  -8    4.26    0.93
   1  -6  -8    2.83    0.95
  -1   6   7    0.89    1.00
   1  -6  -7    0.34    0.73
   1  -6  -7    0.69    1.01
   1  -6  -7    1.30    1.06
   1  -6  -6  146.08    7.99
   1  -6  -6  163.14    8.26
   1  -6  -6  144.99    8.20
  -1   6   6  145.81    8.15
   1  -6  -6  151.91    7.81
  -1   6   5    4.29    0.97
  -1   6   5    6.72    1.28
   1  -6  -5    4.89    0.89
  -1   6   5    5.96    1.16
   1  -6  -5    6.68    1.33
   1  -6  -5    6.46    1.09
   1  -6  -4  160.35    8.64
   1  -6  -4  191.36    9.02
  -1   6   4  173.40    9.07
   1  -6  -4  187.62    9.11
   1  -6  -4  172.21    8.71
  -1   6   4  170.17    8.99
  -1   6   4  150.98    8.69
   1  -6  -3   22.87    1.90
  -1   6   3   22.23    1.95
   1  -6  -3   18.97    1.69
   1  -6  -3   21.99    1.98
   1  -6  -3   20.29    1.58
  -1   6   2   11.36    1.32
   1  -6  -2   14.31    1.52
  -1   6   2    9.22    1.20
  -1   6   2   12.44    1.52
   1  -6  -2   11.86    1.44
  -1   6   2   11.82    1.60
   1  -6  -2   10.47    1.42
   1  -6  -1  547.87   25.50
  -1   6   1  496.15   25.30
  -1   6   1  550.38   25.81
   1  -6  -1  545.24   25.48
  -1   6   1  527.43   25.58
  -1   6   1  535.20   25.49
  -1   6   1  540.70   25.53
  -1   6   1  505.43   25.20
  -1   6   0   89.84    4.92
   1  -6   0   90.90    5.10
   1  -6   0   92.18    4.99
  -1   6   0   92.04    5.14
  -1   6   0   94.84    5.21
  -1   6   0   85.55    5.39
  -1   6   0   87.48    5.15
  -1   6  -1    0.74    0.71
  -1   6  -1    0.36    0.86
  -1   6  -1    0.45    0.96
   1  -6   1    0.09    0.84
   1  -6   2   36.10    2.69
  -1   6  -2   40.71    3.01
  -1   6  -2   41.20    2.78
  -1   6  -2   40.10    2.88
  -1   6  -2   43.36    3.01
  -1   6  -3  111.97    6.18
  -1   6  -3  117.11    6.32
  -1   6  -3  103.45    6.05
  -1   6  -3  118.98    6.20
  -1   6  -3  119.35    6.10
  -1   6  -4  314.98   16.12
  -1   6  -4  291.53   15.67
  -1   6  -4  327.48   16.11
  -1   6  -4  306.53   15.75
  -1   6  -4  347.06   15.89
  -1   6  -5   11.87    1.82
  -1   6  -5   13.93    1.65
  -1   6  -5   12.38    1.50
  -1   6  -5   13.74    1.66
  -1   6  -6    0.13    0.78
  -1   6  -6    0.27    0.86
  -1   6  -6   -0.05    0.97
  -1   6  -6    0.51    1.06
  -1   6  -7   20.57    1.81
  -1   6  -7   23.05    1.74
  -1   6  -7   23.91    1.78
   1  -5 -10    0.51    0.87
   1  -5 -10   -0.04    0.84
   1  -5  -9    1.68    1.06
   1  -5  -9   -0.95    1.09
   1  -5  -9   -1.02    0.93
   1  -5  -8    1.56    1.00
   1  -5  -8    1.70    0.83
  -1   5   8    1.93    0.95
   1  -5  -8    1.27    1.07
   1  -5  -8    0.86    1.06
   1  -5  -7   15.68    1.67
  -1   5   7   17.17    1.81
   1  -5  -7   18.98    1.89
   1  -5  -7   16.90    1.79
   1  -5  -6    1.97    1.00
  -1   5   6    1.51    0.96
   1  -5  -6    1.35    0.75
   1  -5  -6    1.98    0.91
  -1   5   5   23.85    2.05
   1  -5  -5   22.49    2.01
   1  -5  -5   21.78    1.84
   1  -5  -5   26.24    2.04
   1  -5  -5   22.60    1.73
   1  -5  -4  474.28   23.64
  -1   5   4  532.48   23.93
   1  -5  -4  472.03   23.58
   1  -5  -4  535.98   23.87
   1  -5  -4  421.23   24.27
  -1   5   4  492.43   23.89
   1  -5  -4  512.96   23.69
  -1   5   3   17.62    2.65
   1  -5  -3   23.90    1.79
   1  -5  -3   27.46    1.99
  -1   5   3   28.16    2.07
   1  -5  -3   14.71    2.12
   1  -5  -3   25.40    1.69
   1  -5  -3   25.08    1.92
  -1   5   3   25.55    1.95
   1  -5  -3   27.71    1.74
   1  -5  -2   31.47    2.21
   1  -5  -2   35.93    2.27
  -1   5   2   31.41    2.32
  -1   5   2   27.61    2.08
  -1   5   2   33.61    2.29
  -1   5   2   32.03    3.22
   1  -5  -2   30.42    1.92
  -1   5   1  349.90   16.32
  -1   5   1  332.85   16.28
   1  -5  -1  324.64   16.26
   1  -5  -1  330.00   17.47
   1  -5  -1  357.11   16.33
  -1   5   1  311.95   16.05
  -1   5   1  334.54   17.65
  -1   5   1  342.40   16.38
  -1   5   1  335.56   16.21
  -1   5   1  335.71   16.49
  -1   5   0    0.42    0.54
  -1   5   0    0.91    0.58
   1  -5   0    0.41    0.61
  -1   5   0    0.24    0.66
  -1   5   0   -0.19    1.17
  -1   5   0    1.30    0.75
   1  -5   0    0.28    0.77
  -1   5   0    1.16    0.75
   1  -5   0   -0.61    0.91
  -1   5  -1  499.29   24.20
   1  -5   1  467.58   24.54
  -1   5  -1  480.63   23.16
  -1   5  -1  461.14   23.34
  -1   5  -1  526.68   23.24
  -1   5  -1  471.93   23.04
  -1   5  -1  473.73   23.30
  -1   5  -1  477.10   23.19
   1  -5   1  466.00   23.12
  -1   5  -2  287.65   13.98
  -1   5  -2  285.71   13.87
   1  -5   2  254.56   13.74
  -1   5  -2  280.44   13.90
  -1   5  -2  289.02   13.78
  -1   5  -3  148.89    8.27
  -1   5  -3  156.44    8.37
  -1   5  -3  165.56    8.38
  -1   5  -3  153.20    8.41
  -1   5  -3  162.74    8.55
  -1   5  -3  166.88    8.32
  -1   5  -4   39.26    2.88
  -1   5  -4   42.98    3.31
  -1   5  -4   46.60    3.07
  -1   5  -4   46.14    3.09
  -1   5  -5   23.16    1.87
  -1   5  -5   27.37    2.34
  -1   5  -5   29.44    2.52
  -1   5  -5   27.99    2.30
  -1   5  -5   30.28    2.54
  -1   5  -6   45.38    3.47
  -1   5  -6   51.25    3.46
  -1   5  -6   54.43    3.52
  -1   5  -6   53.69    3.65
  -1   5  -6   53.89    3.43
  -1   5  -7    4.66    1.05
  -1   5  -7    5.87    1.28
  -1   5  -7    7.81    1.22
  -1   5  -7    6.62    1.09
  -1   5  -7    5.65    1.11
  -1   5  -8    9.60    1.11
  -1   5  -8    8.70    1.04
   1  -4 -10    3.76    0.93
   1  -4 -10    5.62    1.08
   1  -4  -9    0.56    1.06
   1  -4  -9    0.30    1.00
   1  -4  -9   -0.56    1.15
   1  -4  -8   20.80    1.95
  -1   4   8   20.77    1.88
   1  -4  -8   17.68    1.99
   1  -4  -7  256.21   12.71
   1  -4  -7  250.77   12.80
   1  -4  -7  251.38   12.69
   1  -4  -7  244.03   12.60
   1  -4  -6  273.06   12.36
   1  -4  -6  263.85   12.29
  -1   4   6  245.16   12.38
   1  -4  -6  273.36   12.45
   1  -4  -5  642.59   32.60
   1  -4  -5  680.29   32.90
  -1   4   5  684.61   32.91
   1  -4  -5  719.58   32.83
   1  -4  -5  727.82   32.75
   1  -4  -4  670.88   30.82
  -1   4   4  678.33   31.06
   1  -4  -4  636.95   30.88
   1  -4  -4  628.17   30.90
   1  -4  -4  704.79   32.10
   1  -4  -4  711.44   31.05
  -1   4   4  619.67   30.96
   1  -4  -4  628.14   31.02
   1  -4  -4  620.51   30.80
  -1   4   3  177.52    9.74
   1  -4  -3  168.07    8.47
   1  -4  -3  154.50    8.24
  -1   4   3  165.89    8.51
   1  -4  -3  170.14    8.31
   1  -4  -3  186.52    8.47
  -1   4   3  162.97    8.46
   1  -4  -3  158.89    8.98
   1  -4  -3  166.76    8.27
   1  -4  -3  173.70   10.00
  -1   4   2  102.77    5.31
   1  -4  -2  103.38    6.16
   1  -4  -2   99.58    5.28
   1  -4  -2   91.03    5.20
   1  -4  -2  105.39    5.26
  -1   4   2   99.02    5.35
   1  -4  -2  114.71    7.14
  -1   4   1   40.40    2.61
   1  -4  -1   41.06    3.17
   1  -4  -1   39.94    2.48
   1  -4  -1   41.98    2.54
  -1   4   1   45.05    2.59
  -1   4   1   44.46    3.43
   1  -4  -1   44.87    4.18
  -1   4   0 1223.26   56.62
   1  -4   0 1257.28   57.32
  -1   4   0 1138.13   56.48
  -1   4   0 1253.54   57.54
   1  -4   0 1203.20   56.62
  -1   4   0 1212.21   56.66
   1  -4   0 1353.86   59.23
  -1   4   0 1200.13   56.61
  -1   4   0 1188.03   56.75
   1  -4   1 2145.25   95.55
  -1   4  -1 1947.62   93.03
   1  -4   1 2065.74   93.45
  -1   4  -1 1931.96   93.07
  -1   4  -1 2069.23   93.70
  -1   4  -1 2038.71   92.94
  -1   4  -1 1994.33   92.87
  -1   4  -1 2083.19   92.98
   1  -4   1 1820.75   92.89
  -1   4  -1 1939.86   92.93
  -1   4  -2 1011.06   47.34
  -1   4  -2 1071.35   47.23
  -1   4  -2 1053.61   47.27
  -1   4  -2  988.41   47.61
   1  -4   2  986.14   48.44
  -1   4  -2 1009.33   47.28
  -1   4  -2  974.53   47.25
  -1   4  -2  877.56   47.18
  -1   4  -2 1087.57   48.92
  -1   4  -3  257.64   12.68
  -1   4  -3  267.40   12.69
  -1   4  -3  236.96   12.60
  -1   4  -3  269.66   12.67
  -1   4  -3  247.45   12.75
   1  -4   3  255.29   13.87
  -1   4  -4  181.05    9.59
  -1   4  -4  199.33    9.72
  -1   4  -4  202.56    9.79
  -1   4  -4  192.47    9.79
  -1   4  -4  175.90    9.55
  -1   4  -5    8.06    1.31
  -1   4  -5    5.93    1.32
  -1   4  -5    8.09    1.37
  -1   4  -5    6.83    1.28
  -1   4  -5    5.32    1.05
  -1   4  -5    7.86    1.10
  -1   4  -5    6.45    1.28
  -1   4  -6   51.16    3.43
  -1   4  -6   56.52    3.79
  -1   4  -6   62.84    3.82
  -1   4  -6   58.83    3.90
  -1   4  -6   54.17    3.82
  -1   4  -6   60.63    3.83
  -1   4  -7   31.57    2.38
  -1   4  -7   25.68    2.13
  -1   4  -7   28.39    2.30
  -1   4  -7   26.01    2.26
  -1   4  -7   22.81    1.86
  -1   4  -7   28.49    2.25
  -1   4  -8    0.17    0.78
  -1   4  -8    0.52    0.71
  -1   4  -8    0.12    0.71
  -1   4  -8    0.26    0.79
   1  -3 -11    9.74    1.06
   1  -3 -11    6.48    0.97
   1  -3 -10    1.32    0.73
   1  -3 -10    1.24    0.75
   1  -3 -10    1.93    0.92
   1  -3  -9   27.12    2.19
   1  -3  -9   28.37    2.31
   1  -3  -8  126.38    6.49
   1  -3  -8  127.85    6.48
   1  -3  -8  106.28    6.36
  -1   3   8  100.70    6.20
   1  -3  -7  146.29    7.62
   1  -3  -7  157.00    7.64
   1  -3  -7  140.75    7.31
  -1   3   6    4.07    0.90
   1  -3  -6    3.13    0.83
   1  -3  -6    3.15    0.68
   1  -3  -6    3.55    1.03
   1  -3  -5    3.45    0.76
   1  -3  -5    3.31    0.73
   1  -3  -5    2.41    0.69
   1  -3  -5    3.64    0.90
  -1   3   5    2.26    0.76
   1  -3  -4  180.99    9.34
   1  -3  -4  164.42    9.07
   1  -3  -4  173.99    8.98
  -1   3   4  187.26    9.14
  -1   3   4  167.46   10.04
   1  -3  -4  201.48    9.15
   1  -3  -4  171.82    9.91
   1  -3  -4  189.55    9.12
   1  -3  -4  191.38    8.96
   1  -3  -4  181.38    9.02
   1  -3  -4  179.95    9.15
   1  -3  -3  182.56    8.67
  -1   3   3  178.88    9.61
   1  -3  -3  172.58    8.56
   1  -3  -3  168.29    8.66
   1  -3  -3  169.52    9.42
   1  -3  -3  180.94    9.54
   1  -3  -2   84.94    5.41
  -1   3   2   77.44    5.05
   1  -3  -2   84.05    4.96
   1  -3  -1   53.51    4.01
   1  -3  -1   44.96    3.17
   1  -3   0  309.57   15.43
   1  -3   0  327.12   16.65
  -1   3   0  308.42   15.53
   1  -3   1 1791.46   81.98
   1  -3   1 1676.58   80.45
  -1   3  -1 1716.65   80.61
  -1   3  -2  545.42   25.20
  -1   3  -2  511.53   24.20
  -1   3  -2  518.56   24.14
  -1   3  -2  471.52   24.12
  -1   3  -2  488.87   24.31
   1  -3   2  575.98   26.24
  -1   3  -2  514.10   24.11
  -1   3  -3  124.36    6.28
   1  -3   3  128.14    7.19
  -1   3  -3  115.97    6.32
  -1   3  -3  121.07    6.29
   1  -3   3  129.72    8.02
  -1   3  -4  138.69    7.12
  -1   3  -4  141.97    7.25
  -1   3  -4  134.91    7.24
  -1   3  -4  137.49    7.24
   1  -3   4  156.81    8.18
  -1   3  -4  147.03    7.24
  -1   3  -4  132.00    7.10
  -1   3  -5   12.76    1.37
  -1   3  -5   13.74    1.34
  -1   3  -5   16.41    1.58
  -1   3  -5   18.56    1.55
  -1   3  -5   14.52    1.22
  -1   3  -5   15.00    1.58
  -1   3  -5   18.29    1.65
  -1   3  -5   18.14    1.66
  -1   3  -5   19.11    1.61
  -1   3  -6  239.12   11.28
  -1   3  -6  243.26   11.25
  -1   3  -6  230.64   11.28
  -1   3  -6  199.20   11.06
  -1   3  -6  190.77   10.73
  -1   3  -6  242.13   11.17
  -1   3  -6  219.82   11.21
  -1   3  -7  836.68   39.06
  -1   3  -7  872.15   39.17
  -1   3  -7  844.80   39.04
  -1   3  -7  910.10   39.11
  -1   3  -7  770.52   38.83
  -1   3  -7  708.87   38.77
  -1   3  -8   31.57    2.24
  -1   3  -8   33.77    2.49
  -1   3  -8   28.61    2.28
  -1   3  -8   33.51    2.48
  -1   3  -8   32.80    2.56
  -1   3  -9    4.78    0.99
  -1   3  -9    4.24    0.89
   1  -2 -11    1.69    0.67
   1  -2 -11    1.24    0.63
   1  -2 -10    0.50    0.71
   1  -2 -10    0.94    0.66
   1  -2  -9  192.19    9.46
   1  -2  -9  189.61    9.27
   1  -2  -8  191.47    9.65
   1  -2  -8  194.95    9.77
   1  -2  -8  171.10    9.62
   1  -2  -8  183.74    9.84
   1  -2  -7  245.36   11.22
   1  -2  -7  249.76   11.16
   1  -2  -7  242.79   11.36
   1  -2  -6   15.36    1.27
   1  -2  -6   14.43    1.27
   1  -2  -6   15.85    1.52
   1  -2  -6   19.20    1.62
   1  -2  -6   15.97    1.52
   1  -2  -5   47.43    2.70
   1  -2  -5   42.07    2.59
   1  -2  -5   43.81    2.57
   1  -2  -4   73.66    4.61
  -1   2   4   81.39    4.83
   1  -2  -4   72.92    3.94
   1  -2  -3  182.75    9.93
   1  -2  -3  206.23    9.71
  -1   2   3  182.32    9.99
   1  -2  -2  156.88    8.33
  -1   2   2  160.30    8.68
  -1   2   2  156.54    8.26
  -1   2   1 1188.66   56.85
   1  -2  -1 1215.51   56.80
  -1   2   0  684.92   34.86
   1  -2   0  783.07   35.65
   1  -2   0  717.67   34.83
  -1   2  -1  838.73   40.93
   1  -2   1  944.17   41.97
  -1   2  -2  803.79   38.87
  -1   2  -2  811.65   39.29
   1  -2   3   37.82    3.15
  -1   2  -3   33.87    2.07
  -1   2  -3   32.82    2.06
   1  -2   4  160.52    9.24
  -1   2  -4  162.62    8.06
  -1   2  -4  162.86    8.23
  -1   2  -4  166.09    8.20
  -1   2  -4  161.78    8.21
  -1   2  -4  173.05    8.25
  -1   2  -4  151.48    8.15
   1  -2   4  179.59    8.81
  -1   2  -5  122.70    6.24
  -1   2  -5  117.78    6.36
  -1   2  -5  132.79    6.51
  -1   2  -5  129.84    6.40
  -1   2  -5  114.37    6.21
  -1   2  -5  124.89    6.43
  -1   2  -5  111.68    6.32
  -1   2  -5  119.69    6.27
  -1   2  -5  129.67    6.49
  -1   2  -6   43.78    2.88
  -1   2  -6   53.44    3.02
  -1   2  -6   54.10    3.25
  -1   2  -6   49.06    3.09
  -1   2  -6   46.61    2.94
  -1   2  -6   47.02    3.09
  -1   2  -6   49.12    3.03
  -1   2  -6   53.75    3.21
  -1   2  -6   50.21    3.25
  -1   2  -7   78.96    4.59
  -1   2  -7   80.03    4.26
  -1   2  -7   79.08    4.47
  -1   2  -7   74.47    4.59
  -1   2  -7   74.19    4.41
  -1   2  -7   62.19    4.10
  -1   2  -7   71.82    4.29
  -1   2  -8  753.94   35.81
  -1   2  -8  717.17   36.01
  -1   2  -8  789.93   36.08
  -1   2  -8  745.07   36.15
  -1   2  -8  751.75   36.19
  -1   2  -9    1.13    0.90
  -1   2  -9    1.97    0.75
  -1   2  -9    1.47    0.95
   1  -1 -11   24.61    1.68
   1  -1 -10    8.43    1.15
   1  -1 -10    9.09    1.10
   1  -1  -9  120.34    6.35
   1  -1  -9  134.29    6.74
   1  -1  -8   19.73    1.97
   1  -1  -8   23.87    2.16
   1  -1  -8   24.16    1.91
   1  -1  -7    0.74    0.65
   1  -1  -7    1.04    0.75
   1  -1  -7    1.06    0.91
   1  -1  -7    1.12    0.90
   1  -1  -7    1.07    0.87
   1  -1  -6  197.47    9.38
   1  -1  -6  168.99    9.42
   1  -1  -6  171.82    9.36
   1  -1  -6  200.92    9.51
   1  -1  -6  203.93    9.58
   1  -1  -6  182.05    9.28
   1  -1  -5  621.03   29.39
   1  -1  -5  660.09   29.51
   1  -1  -5  591.15   29.51
   1  -1  -5  613.56   29.42
   1  -1  -5  579.22   29.47
   1  -1  -5  659.59   29.55
   1  -1  -4   65.31    3.57
   1  -1  -4   65.42    3.54
  -1   1   4   72.36    4.15
   1  -1  -4   71.11    3.68
   1  -1  -4   65.94    3.61
  -1   1   3   17.30    1.36
   1  -1  -3   17.06    1.04
  -1   1   3   17.12    1.58
   1  -1  -2  938.92   41.79
  -1   1   2  869.19   41.93
  -1   1   2  834.33   41.92
  -1   1   1 2766.49  126.69
   1  -1  -1 2684.68  126.45
  -1   1   1 2673.73  126.45
   1  -1   0 2017.25   96.06
  -1   1   0 2075.63   96.20
  -1   1  -1  210.82   10.24
   1  -1   1  219.64   10.85
  -1   1  -2  444.15   19.91
  -1   1  -2  389.31   19.78
   1  -1   2  470.91   20.72
  -1   1  -2  530.20   21.25
  -1   1  -3  344.34   16.47
   1  -1   3  297.73   15.59
  -1   1  -4   84.85    4.45
   1  -1   4   84.49    4.87
  -1   1  -4   81.63    4.38
   1  -1   4   89.06    4.65
  -1   1  -4   85.95    4.46
  -1   1  -4   83.83    4.41
  -1   1  -5   15.13    1.41
  -1   1  -5   17.52    1.27
  -1   1  -5   19.82    1.53
  -1   1  -5   19.42    1.50
  -1   1  -5   15.66    1.32
  -1   1  -5   16.89    1.28
  -1   1  -5   16.86    1.21
  -1   1  -5   16.30    1.30
  -1   1  -5   19.65    1.43
  -1   1  -6   43.64    2.78
  -1   1  -6   48.27    2.97
  -1   1  -6   45.60    2.94
  -1   1  -6   47.94    2.80
  -1   1  -6   38.91    2.58
  -1   1  -6   49.45    2.95
  -1   1  -6   44.34    2.66
  -1   1  -6   44.21    2.54
  -1   1  -6   39.83    2.59
  -1   1  -7  296.34   14.40
  -1   1  -7  295.64   14.40
  -1   1  -7  298.06   14.21
  -1   1  -7  296.29   14.37
  -1   1  -7  251.15   14.08
  -1   1  -8    6.84    1.16
  -1   1  -8    6.92    1.42
  -1   1  -8    5.97    1.20
  -1   1  -8    6.28    1.23
  -1   1  -8    7.51    1.43
  -1   1  -9    2.22    0.94
  -1   1  -9    2.38    1.23
  -1   1  -9    2.73    1.18
  -1   1  -9    4.14    1.13
  -1   1 -10    1.94    0.60
  -1   1 -10    0.77    0.60
   1   0 -10  106.74    6.11
   1   0 -10  122.98    6.19
   1   0  -9  168.17    9.31
   1   0  -9  168.08    9.38
   1   0  -8   30.18    2.30
   1   0  -8   23.66    1.92
   1   0  -8   30.09    2.36
   1   0  -8   20.02    2.03
   1   0  -8   25.62    2.17
   1   0  -8   33.85    2.07
   1   0  -7   35.97    2.26
   1   0  -7   29.49    2.35
   1   0  -7   27.65    2.27
   1   0  -7   34.91    2.31
   1   0  -7   38.25    2.54
   1   0  -7   35.03    2.49
   1   0  -6  254.46   12.46
   1   0  -6  264.32   12.62
   1   0  -6  250.17   12.53
   1   0  -6  255.71   12.64
   1   0  -6  235.98   12.55
   1   0  -6  253.32   12.54
   1   0  -6  269.58   12.67
   1   0  -5  212.94   10.30
   1   0  -5  183.35   10.22
   1   0  -5  214.14   10.34
   1   0  -5  216.26   10.41
   1   0  -5  215.10   10.39
   1   0  -5  226.15   10.47
   1   0  -5  211.87   10.36
   1   0  -5  221.70   10.47
  -1   0   4 1385.33   64.32
   1   0  -4 1316.30   64.09
  -1   0   4 1355.69   64.96
   1   0  -4 1411.99   64.16
  -1   0   3   27.07    1.88
  -1   0   3   29.34    1.72
  -1   0   3   27.81    2.71
   1   0  -2  249.87   11.91
  -1   0   2  243.49   11.97
  -1   0   2  254.00   12.05
  -1   0   2  249.64   12.81
  -1   0   1 1692.16   79.26
   1   0   0    0.21    1.18
  -1   0   0    0.11    0.54
   1   0   0    0.41    0.42
  -1   0   0   -0.25    0.84
   1   0   1    3.79    1.03
   1   0   1    2.16    0.62
  -1   0  -2  224.00   11.04
   1   0   2  231.50   10.87
   1   0   2  210.67   10.78
  -1   0  -2  223.10   10.70
  -1   0  -3  537.67   24.94
  -1   0  -3  517.93   25.48
   1   0   3  551.96   25.17
   1   0   3  501.40   25.06
   1   0   4    1.72    0.31
   1   0   4    1.68    0.33
  -1   0  -4    2.61    0.66
  -1   0  -4    1.70    0.59
  -1   0  -4    1.46    0.56
  -1   0  -5  545.05   25.95
  -1   0  -5  563.11   26.13
  -1   0  -5  547.41   26.11
  -1   0  -5  553.48   26.14
  -1   0  -5  522.56   25.88
  -1   0  -5  530.61   25.98
  -1   0  -5  578.44   26.09
  -1   0  -6  173.27    7.99
  -1   0  -6  143.60    7.67
  -1   0  -6  159.93    8.05
  -1   0  -6  151.16    7.74
  -1   0  -6  134.74    7.76
  -1   0  -6  160.46    8.02
  -1   0  -6  167.19    8.04
  -1   0  -7  102.64    5.62
  -1   0  -7   84.02    5.08
  -1   0  -7  100.98    5.22
  -1   0  -7  108.41    5.62
  -1   0  -7   97.36    5.57
  -1   0  -7   90.06    5.29
  -1   0  -7  106.72    5.49
  -1   0  -8   21.13    2.02
  -1   0  -8   17.43    1.87
  -1   0  -8   19.64    2.13
  -1   0  -8   17.02    2.01
  -1   0  -8   17.77    1.53
  -1   0  -9   13.10    1.76
  -1   0  -9   17.19    1.83
  -1   0  -9   14.39    1.80
  -1   0 -10   21.52    1.67
  -1   0 -10   17.41    1.70
   1   1 -10  106.70    5.13
   1   1 -10   87.85    5.09
   1   1  -9   26.52    2.18
   1   1  -9   25.59    2.10
   1   1  -9   23.21    2.07
   1   1  -8   47.83    2.95
   1   1  -8   42.49    2.94
   1   1  -8   45.84    2.92
   1   1  -7    2.84    0.85
   1   1  -7    1.35    0.79
   1   1  -7    1.22    0.78
   1   1  -7    2.10    0.82
   1   1  -7    1.50    0.64
   1   1  -7    3.20    0.98
   1   1  -7    2.58    0.85
   1   1  -6    1.55    0.65
   1   1  -6    1.12    0.53
   1   1  -6    1.51    0.66
   1   1  -6    0.75    0.62
   1   1  -6    1.43    0.75
   1   1  -6    0.83    0.46
   1   1  -6    1.30    0.71
   1   1  -6    0.60    0.58
   1   1  -5  782.61   39.12
   1   1  -5  847.32   39.25
   1   1  -5  826.36   39.25
   1   1  -5  829.07   39.20
   1   1  -5  796.54   39.07
   1   1  -5  812.47   39.25
   1   1  -5  863.67   39.36
   1   1  -5  878.45   39.36
   1   1  -5  872.37   39.23
   1   1  -4  617.67   30.48
   1   1  -4  658.27   30.54
  -1  -1   4  644.57   30.59
   1   1  -4  642.48   30.45
  -1  -1   4  714.59   31.19
   1   1  -4  631.29   30.54
  -1  -1   3  520.65   24.61
  -1  -1   3  507.39   24.76
  -1  -1   3  538.40   24.88
   1   1  -2  190.98    9.70
  -1  -1   2  178.96    9.07
   1   1  -2  177.29    9.08
  -1  -1   2  192.95    9.17
  -1  -1   1  113.28    5.94
  -1  -1   1  124.56    6.10
  -1  -1   0   -0.47    0.73
   1   1   0    1.08    0.53
  -1  -1   0    0.04    0.49
   1   1   0   -0.33    0.86
   1   1   1 2774.50  131.73
  -1  -1  -1 2849.89  131.70
  -1  -1  -3  350.88   15.39
   1   1   3  304.19   14.88
  -1  -1  -4  132.57    6.70
  -1  -1  -4  133.91    6.91
  -1  -1  -4  130.37    6.64
   1   1   4  134.84    7.14
  -1  -1  -4  134.59    6.69
  -1  -1  -5  143.84    7.79
  -1  -1  -5  154.13    7.76
  -1  -1  -5  159.10    8.00
  -1  -1  -5  162.48    7.98
  -1  -1  -5  174.43    8.04
  -1  -1  -5  153.35    7.84
  -1  -1  -5  153.76    7.98
   1   1   5  167.02    8.35
  -1  -1  -6    7.64    0.93
  -1  -1  -6    6.43    1.25
  -1  -1  -6    4.41    0.92
  -1  -1  -6    6.42    0.97
  -1  -1  -6    6.82    1.24
  -1  -1  -7   53.44    3.50
  -1  -1  -7   53.50    3.18
  -1  -1  -7   46.75    3.02
  -1  -1  -7   52.78    3.50
  -1  -1  -8   14.42    1.88
  -1  -1  -8   17.69    1.87
  -1  -1  -8   15.40    1.91
  -1  -1  -8   16.95    1.54
  -1  -1  -8   10.62    1.27
  -1  -1  -9   56.75    3.32
  -1  -1  -9   60.53    3.84
  -1  -1  -9   53.38    3.56
  -1  -1 -10    0.29    0.88
  -1  -1 -10    1.64    0.84
  -1  -1 -10    1.22    0.88
  -1  -1 -11    1.20    0.55
   1   2  -9    5.42    0.92
   1   2  -9    3.97    0.86
   1   2  -9    5.34    0.91
   1   2  -9    5.46    0.81
   1   2  -8   96.10    5.24
   1   2  -8   87.24    5.09
   1   2  -8  101.39    5.13
   1   2  -8   82.46    4.94
   1   2  -8   88.80    5.20
   1   2  -8   93.22    5.30
   1   2  -7  169.90    9.65
   1   2  -7  188.69    9.73
   1   2  -7  195.00   10.02
   1   2  -7  198.42    9.74
   1   2  -7  180.27    9.59
   1   2  -7  216.74   10.00
   1   2  -7  184.82    9.72
   1   2  -7  193.73    9.71
   1   2  -7  195.75    9.93
   1   2  -7  200.42    9.94
   1   2  -6    9.90    1.14
   1   2  -6   10.73    1.11
   1   2  -6   11.72    1.13
   1   2  -6    9.77    1.15
   1   2  -6   10.39    1.12
   1   2  -6   11.17    1.35
   1   2  -6   11.84    1.33
   1   2  -6   10.76    1.24
   1   2  -5   44.29    2.77
   1   2  -5   43.17    2.63
   1   2  -5   46.55    2.65
   1   2  -5   43.96    2.67
   1   2  -5   43.92    2.65
   1   2  -5   46.09    2.83
   1   2  -5   43.40    2.79
   1   2  -4  384.89   18.48
   1   2  -4  412.10   18.63
   1   2  -4  349.96   18.38
   1   2  -4  361.16   18.39
   1   2  -4  374.12   18.50
   1   2  -4  395.75   18.61
   1   2  -4  404.06   18.66
  -1  -2   4  405.90   18.98
   1   2  -4  405.27   18.46
   1   2  -3   49.34    2.13
  -1  -2   3   44.27    2.48
   1   2  -3   48.94    2.15
   1   2  -3   46.13    2.11
   1   2  -2  792.37   37.90
  -1  -2   2  782.99   37.74
  -1  -2   2  763.38   37.41
   1   2  -1 1248.45   53.95
  -1  -2   1 1112.32   53.68
  -1  -2   1 1081.24   53.76
   1   2   0  410.69   20.46
  -1  -2   0  442.60   20.53
  -1  -2   0  422.81   20.45
  -1  -2  -1 1955.27   91.16
   1   2   1 1998.31   91.22
   1   2   1 1882.95   90.98
  -1  -2  -3 2974.14  137.09
   1   2   3 2834.09  137.13
  -1  -2  -3 3161.43  136.56
  -1  -2  -4  536.49   25.46
  -1  -2  -4  561.73   25.61
   1   2   4  531.28   26.25
  -1  -2  -4  506.89   25.40
  -1  -2  -4  568.26   26.12
  -1  -2  -5  311.59   14.62
  -1  -2  -5  284.71   14.39
  -1  -2  -5  293.26   14.61
   1   2   5  301.56   15.31
  -1  -2  -5  299.88   14.42
  -1  -2  -5  292.27   15.00
  -1  -2  -5  290.48   14.32
  -1  -2  -5  304.66   14.50
  -1  -2  -6   78.38    4.31
  -1  -2  -6   79.80    4.36
  -1  -2  -6   71.70    4.18
  -1  -2  -6   79.64    4.61
  -1  -2  -6   74.12    4.54
  -1  -2  -6   78.19    4.44
  -1  -2  -7  126.15    7.13
  -1  -2  -7  134.90    6.90
  -1  -2  -7  140.97    7.06
  -1  -2  -7  133.87    7.14
  -1  -2  -7  132.02    6.80
  -1  -2  -8   29.54    2.21
  -1  -2  -8   32.09    2.44
  -1  -2  -8   25.51    2.55
  -1  -2  -9    0.36    0.81
  -1  -2 -10   14.88    1.37
  -1  -2 -10   16.05    1.76
  -1  -2 -11   10.59    1.09
  -1  -2 -11    7.77    0.90
   1   3  -8   73.59    4.15
   1   3  -8   78.94    4.30
   1   3  -8   66.07    4.20
   1   3  -8   73.99    4.25
   1   3  -8   64.60    4.04
   1   3  -7   64.56    3.96
   1   3  -7   64.23    4.18
   1   3  -7   68.14    4.09
   1   3  -7   67.53    4.06
   1   3  -7   73.53    4.20
   1   3  -7   64.20    4.22
   1   3  -7   77.40    4.12
   1   3  -7   70.98    4.29
   1   3  -6   38.82    2.62
   1   3  -6   48.16    2.92
   1   3  -6   42.41    2.77
   1   3  -6   44.87    3.10
   1   3  -6   44.70    3.04
   1   3  -6   44.22    2.89
   1   3  -6   46.12    2.88
   1   3  -6   46.47    3.09
   1   3  -6   44.22    2.67
   1   3  -6   44.90    3.01
   1   3  -5  188.20    9.87
   1   3  -5  184.18    9.76
   1   3  -5  207.46   10.06
   1   3  -5  196.00   10.00
   1   3  -5  209.39   10.19
   1   3  -5  181.40    9.73
   1   3  -5  216.08   10.29
   1   3  -5  216.07   10.20
   1   3  -5  209.48   10.00
   1   3  -5  214.55   10.23
   1   3  -4    2.65    0.81
   1   3  -4    3.64    1.06
  -1  -3   4    1.80    0.99
   1   3  -4    2.96    1.04
   1   3  -4    3.01    0.88
   1   3  -4    3.43    1.06
   1   3  -4    3.74    1.00
   1   3  -4    4.00    1.07
   1   3  -4    3.30    0.86
   1   3  -3    3.80    0.77
   1   3  -3    3.81    0.84
  -1  -3   3    3.22    0.97
   1   3  -3    3.49    0.69
   1   3  -3    3.29    0.67
   1   3  -3    4.06    0.75
   1   3  -3    3.95    0.85
  -1  -3   2   99.07    6.56
  -1  -3   2   73.42    4.40
   1   3  -2   87.92    5.03
   1   3  -2   89.29    4.41
  -1  -3   2   77.62    4.88
   1   3  -2   81.96    4.34
   1   3  -2   84.01    4.32
   1   3  -2   75.33    4.33
  -1  -3   1   97.32    5.45
  -1  -3   1   97.52    5.63
   1   3  -1  104.12    5.77
  -1  -3   0  187.46   10.35
   1   3   0  201.86   10.57
  -1  -3   0  210.63   10.45
  -1  -3  -1  418.64   20.57
   1   3   2 2438.79  110.49
  -1  -3  -2 2282.48  109.96
  -1  -3  -3 2741.48  126.55
  -1  -3  -3 2720.53  127.18
   1   3   3 2593.18  127.23
  -1  -3  -4   50.60    3.01
   1   3   4   60.97    4.11
  -1  -3  -4   58.09    3.91
  -1  -3  -4   52.38    3.04
  -1  -3  -4   52.60    2.97
  -1  -3  -4   58.43    3.16
  -1  -3  -4   58.21    3.07
  -1  -3  -4   54.10    3.53
  -1  -3  -4   50.44    3.07
  -1  -3  -4   53.28    3.05
  -1  -3  -5   20.86    1.61
  -1  -3  -5   21.68    1.65
   1   3   5   25.30    2.61
  -1  -3  -5   22.41    1.65
  -1  -3  -5   20.43    1.68
  -1  -3  -5   23.65    1.76
  -1  -3  -5   22.83    2.01
  -1  -3  -5   23.37    1.70
  -1  -3  -5   21.50    1.98
  -1  -3  -5   23.99    2.36
  -1  -3  -6   33.44    2.22
  -1  -3  -6   32.15    2.20
  -1  -3  -6   29.10    2.29
  -1  -3  -6   26.60    2.48
  -1  -3  -6   34.53    2.59
  -1  -3  -6   30.88    2.10
  -1  -3  -7   27.55    2.34
  -1  -3  -7   26.88    2.21
  -1  -3  -7   22.98    1.98
  -1  -3  -7   24.90    2.13
  -1  -3  -8    6.98    1.26
  -1  -3  -8    7.27    1.48
  -1  -3  -8    9.87    1.44
  -1  -3  -9   26.37    2.14
  -1  -3  -9   29.83    2.36
  -1  -3  -9   24.63    2.42
  -1  -3 -10    4.50    1.13
  -1  -3 -10    4.76    0.95
   1   3  10    3.07    0.97
  -1  -3 -11    1.66    0.74
   1   4  -8    0.08    0.76
   1   4  -8    0.38    0.58
   1   4  -8    0.70    0.69
   1   4  -7    3.69    0.92
   1   4  -7    4.03    1.01
   1   4  -7    2.89    1.00
   1   4  -7    3.35    0.91
   1   4  -7    2.27    0.92
   1   4  -7    3.12    1.09
   1   4  -6  847.40   38.18
   1   4  -6  824.61   38.24
   1   4  -6  828.95   37.96
   1   4  -6  876.06   38.07
   1   4  -6  730.95   37.76
   1   4  -6  809.39   38.16
   1   4  -6  834.02   38.24
   1   4  -6  690.04   37.75
   1   4  -5  426.69   19.82
   1   4  -5  348.34   19.37
   1   4  -5  417.13   19.43
   1   4  -5  419.98   19.62
   1   4  -5  400.70   19.73
   1   4  -5  399.96   19.50
   1   4  -5  417.13   19.74
   1   4  -5  393.83   19.75
   1   4  -3  377.63   17.99
   1   4  -3  342.09   17.96
   1   4  -3  366.74   18.05
   1   4  -3  374.88   18.09
   1   4  -3  379.85   18.24
   1   4  -3  391.06   18.19
   1   4  -3  391.01   18.31
  -1  -4   3  376.75   19.13
  -1  -4   2  153.82    8.08
   1   4  -2  144.88    7.74
   1   4  -2  154.36    7.98
   1   4  -2  165.98    7.92
   1   4  -2  157.20    7.78
   1   4  -2  170.02    8.81
   1   4  -2  154.61    7.92
  -1  -4   2  162.55    8.84
   1   4  -2  165.93    8.04
   1   4  -2  151.76    7.86
   1   4  -2  146.12    7.84
   1   4  -2  152.53    7.83
   1   4  -1  167.01    8.67
  -1  -4   1  173.41    9.23
   1   4  -1  164.99    8.84
   1   4  -1  166.35    8.76
   1   4  -1  189.65    8.76
   1   4  -1  179.29    8.74
   1   4  -1  180.43    8.88
   1   4  -1  180.00    9.65
  -1  -4   1  169.63    9.53
   1   4  -1  175.80    8.66
   1   4  -1  175.62    8.75
  -1  -4   0   10.80    1.49
   1   4   0   10.84    1.72
   1   4   0    9.79    1.04
  -1  -4   0    9.91    2.72
   1   4   0    8.05    0.97
  -1  -4   0    8.79    1.48
   1   4   1    0.45    0.62
   1   4   1    1.30    1.34
  -1  -4  -1    0.79    0.80
  -1  -4  -1    0.40    1.01
   1   4   2  254.23   13.18
  -1  -4  -2  236.33   12.02
  -1  -4  -2  275.54   13.10
  -1  -4  -2  255.77   12.62
   1   4   2  236.50   12.01
  -1  -4  -3   16.51    1.26
  -1  -4  -3   18.09    1.52
   1   4   3   19.58    2.41
   1   4   3   14.48    1.47
   1   4   3   16.52    1.35
  -1  -4  -4  399.36   18.33
   1   4   4  373.31   17.95
  -1  -4  -4  358.93   17.82
  -1  -4  -4  382.38   18.06
  -1  -4  -4  369.56   19.27
  -1  -4  -4  362.79   17.92
  -1  -4  -4  380.56   18.11
  -1  -4  -4  374.39   17.98
   1   4   4  365.39   19.38
  -1  -4  -4  392.45   18.04
   1   4   4  347.37   18.12
  -1  -4  -5  136.54    7.42
   1   4   5  128.84    8.75
  -1  -4  -5  149.72    7.55
  -1  -4  -5  142.29    7.40
  -1  -4  -5  146.94    7.51
  -1  -4  -5  149.79    7.33
  -1  -4  -5  142.38    7.39
  -1  -4  -6   74.93    4.21
  -1  -4  -6   71.37    4.06
  -1  -4  -6   64.47    4.00
  -1  -4  -6   67.88    4.11
  -1  -4  -6   69.92    3.96
  -1  -4  -6   65.18    3.97
  -1  -4  -7   12.55    1.51
  -1  -4  -7   11.56    1.42
  -1  -4  -7   11.84    1.32
  -1  -4  -7   14.71    1.68
  -1  -4  -8   21.84    2.09
  -1  -4  -8   18.68    1.83
  -1  -4  -8   17.13    2.12
   1   4   8   18.07    2.17
  -1  -4  -9    6.13    1.40
  -1  -4  -9    7.59    1.32
   1   4   9    6.01    1.37
  -1  -4  -9    4.93    0.97
  -1  -4 -10    1.05    0.84
   1   4  10    1.24    0.84
  -1  -4 -10    0.88    0.83
  -1  -4 -11    2.80    0.63
  -1  -4 -11    1.98    0.70
   1   5  -8   14.42    1.31
   1   5  -8   12.21    1.26
   1   5  -7    0.52    0.77
   1   5  -7    1.16    0.75
   1   5  -7    0.69    0.69
   1   5  -7    0.79    0.67
   1   5  -7    1.72    0.93
   1   5  -7    0.67    0.93
   1   5  -6   30.34    2.59
   1   5  -6   26.27    2.06
   1   5  -6   28.01    2.46
   1   5  -6   32.38    2.54
   1   5  -6   35.47    2.45
   1   5  -6   28.31    2.45
   1   5  -6   31.23    2.26
   1   5  -4   10.78    1.43
   1   5  -4   11.73    1.58
   1   5  -4    9.36    1.30
   1   5  -4    9.31    1.19
   1   5  -4    9.83    1.48
   1   5  -3  343.99   17.17
   1   5  -3  351.63   17.05
   1   5  -3  341.89   16.82
   1   5  -3  357.23   17.16
   1   5  -3  332.52   16.95
   1   5  -3  334.93   17.19
   1   5  -3  353.40   16.96
  -1  -5   2    3.60    1.11
   1   5  -2    2.62    0.97
   1   5  -2    2.70    0.91
   1   5  -2    3.51    0.91
   1   5  -2    4.01    1.04
   1   5  -2    2.62    1.19
   1   5  -2    1.71    0.75
   1   5  -2    3.42    0.92
   1   5  -2    2.80    0.86
   1   5  -2    2.53    0.99
   1   5  -1    7.72    1.12
  -1  -5   1    9.69    1.43
   1   5  -1    7.54    1.10
   1   5  -1    9.23    1.13
  -1  -5   1    8.14    1.55
   1   5  -1    7.71    1.64
   1   5  -1    8.43    1.36
   1   5  -1    8.47    1.13
   1   5  -1    8.64    1.04
   1   5  -1    8.22    1.05
  -1  -5   0  302.96   14.45
   1   5   0  271.77   13.43
   1   5   0  266.83   13.39
  -1  -5   0  256.83   13.29
  -1  -5   0  267.85   14.46
   1   5   0  279.68   13.39
   1   5   0  290.02   14.83
   1   5   0  273.39   13.30
  -1  -5  -1    5.72    1.32
   1   5   1    5.91    1.01
  -1  -5  -1    3.64    1.15
   1   5   1    5.04    0.85
   1   5   1    5.77    0.77
   1   5   1    5.85    0.97
   1   5   1    5.75    1.02
   1   5   1    4.22    1.56
  -1  -5  -1    3.83    0.87
  -1  -5  -2  212.65   10.74
  -1  -5  -2  240.33   10.86
   1   5   2  220.16   10.80
   1   5   2  213.72   10.67
   1   5   2  196.76   10.49
  -1  -5  -3    0.02    0.49
  -1  -5  -3   -0.48    1.66
   1   5   3    0.23    0.70
   1   5   3    0.29    0.47
  -1  -5  -3    0.33    0.51
  -1  -5  -3   -0.08    0.79
  -1  -5  -3   -0.29    0.71
   1   5   3   -0.16    0.77
   1   5   3   -0.12    1.37
  -1  -5  -4  157.53    7.94
  -1  -5  -4  153.71    7.71
  -1  -5  -4  154.70    7.85
   1   5   4  162.34    9.63
   1   5   4  139.37    7.97
  -1  -5  -4  141.50    8.33
   1   5   4  153.67    7.87
  -1  -5  -5    7.72    0.91
   1   5   5    6.55    1.26
  -1  -5  -5    7.82    1.07
  -1  -5  -5    8.58    1.19
  -1  -5  -5    6.83    1.10
  -1  -5  -5    6.41    1.17
  -1  -5  -6   13.32    1.30
  -1  -5  -6   12.51    1.44
  -1  -5  -6   12.01    1.50
  -1  -5  -6   14.23    1.56
  -1  -5  -6   13.38    1.59
  -1  -5  -6   11.94    1.47
   1   5   6   12.80    1.67
  -1  -5  -7    5.08    1.19
  -1  -5  -7    3.00    1.09
   1   5   7    3.45    1.32
  -1  -5  -7    4.49    1.09
  -1  -5  -7    4.74    1.01
   1   5   8   10.84    1.71
  -1  -5  -8    8.85    1.23
  -1  -5  -8    8.56    1.38
  -1  -5  -8   11.65    1.60
   1   5   9    2.80    1.15
  -1  -5  -9    3.57    1.01
  -1  -5  -9    2.85    0.90
   1   5  10   13.11    1.50
  -1  -5 -10   16.16    1.49
   1   6  -7    7.48    1.19
   1   6  -7    6.33    0.97
   1   6  -7    7.54    1.18
   1   6  -6    0.63    0.84
   1   6  -6    0.12    1.04
   1   6  -6    0.04    0.72
   1   6  -6    1.56    1.09
   1   6  -5   12.19    1.31
   1   6  -5   15.67    1.68
   1   6  -5   11.19    1.66
   1   6  -5   11.03    1.62
   1   6  -5   14.13    1.51
   1   6  -5   14.15    1.92
   1   6  -4  973.23   43.65
   1   6  -4  870.64   43.66
   1   6  -4  887.28   43.19
   1   6  -4  900.48   43.68
   1   6  -4  918.22   43.38
   1   6  -3   37.97    2.84
   1   6  -3   37.56    3.07
   1   6  -3   44.32    3.03
   1   6  -3   39.73    3.11
   1   6  -3   38.68    2.86
   1   6  -3   39.10    2.71
   1   6  -3   38.38    3.08
   1   6  -3   41.80    2.92
   1   6  -2  288.41   14.62
   1   6  -2  293.71   14.50
   1   6  -2  294.11   14.58
   1   6  -2  283.44   14.41
   1   6  -2  272.76   14.65
   1   6  -2  292.46   14.74
   1   6  -2  307.87   14.50
   1   6  -2  276.60   14.30
   1   6  -1   15.75    1.71
   1   6  -1   16.99    1.61
   1   6  -1   17.30    1.62
   1   6  -1   17.96    1.64
   1   6  -1   16.19    1.80
   1   6   0    4.40    0.99
   1   6   0    4.52    0.88
   1   6   0    3.15    0.89
  -1  -6   0    4.46    0.88
   1   6   0    4.17    1.07
   1   6   0    4.52    1.60
  -1  -6   0    4.38    1.22
   1   6   1    0.20    0.84
   1   6   1    0.91    0.88
   1   6   1    1.77    0.63
  -1  -6  -1    1.02    1.03
   1   6   1    0.80    0.67
   1   6   1    0.78    0.91
  -1  -6  -1    0.77    0.80
   1   6   2   92.57    5.14
  -1  -6  -2   89.39    5.09
   1   6   2   79.87    4.66
  -1  -6  -2   86.47    4.96
  -1  -6  -3   42.37    2.46
   1   6   3   42.90    2.94
  -1  -6  -3   36.78    2.49
  -1  -6  -3   45.25    2.95
  -1  -6  -3   39.05    3.42
  -1  -6  -3   45.53    2.91
   1   6   3   36.97    2.46
   1   6   3   44.66    2.98
   1   6   4   39.32    2.89
   1   6   4   36.89    2.68
  -1  -6  -4   35.20    2.55
  -1  -6  -4   40.23    2.81
  -1  -6  -4   40.40    3.22
  -1  -6  -4   36.58    2.40
  -1  -6  -5    8.07    1.40
  -1  -6  -5    7.34    1.21
   1   6   5    7.32    1.18
  -1  -6  -5    6.68    1.09
  -1  -6  -5    5.87    1.32
   1   6   5    5.64    1.36
  -1  -6  -6   23.80    2.22
  -1  -6  -6   25.55    1.87
  -1  -6  -6   28.99    2.18
  -1  -6  -6   26.33    2.28
   1   6   6   27.78    2.50
  -1  -6  -6   26.79    2.35
  -1  -6  -7   24.63    2.15
  -1  -6  -7   21.10    2.12
  -1  -6  -7   23.05    1.85
  -1  -6  -7   23.60    2.22
   1   6   7   24.98    2.41
  -1  -6  -8    0.90    0.96
  -1  -6  -8    2.24    0.82
  -1  -6  -8    0.81    0.80
   1   6   8    1.84    1.20
  -1  -6  -8    2.65    1.13
  -1  -6  -9    2.76    1.05
  -1  -6  -9    2.27    0.79
   1   6   9    3.42    1.12
  -1  -6  -9    2.30    0.84
  -1  -6 -10   -0.41    0.70
   1   6  10   -0.46    0.70
  -1  -6 -10    0.03    0.55
   1   7  -6    9.79    1.15
   1   7  -6    7.47    0.97
   1   7  -6    9.69    1.38
   1   7  -5   22.81    2.06
   1   7  -5   18.21    1.62
  -1  -7   5   13.88    1.61
   1   7  -5   20.71    1.81
   1   7  -5   16.08    1.41
   1   7  -4    6.01    1.00
   1   7  -4    5.61    1.42
  -1  -7   4    4.19    1.33
   1   7  -4    5.63    1.15
   1   7  -3  636.77   30.37
  -1  -7   3  567.47   30.34
   1   7  -3  660.08   30.46
   1   7  -3  585.04   30.03
   1   7  -3  632.25   30.29
   1   7  -3  686.22   30.39
   1   7  -3  631.22   30.66
   1   7  -2  145.15    7.83
  -1  -7   2  137.94    7.98
   1   7  -2  141.05    7.98
   1   7  -2  145.39    8.11
   1   7  -2  139.54    7.65
   1   7  -2  144.89    7.87
   1   7  -2  147.16    7.80
   1   7  -1   37.36    3.03
   1   7  -1   35.11    2.76
   1   7  -1   37.35    2.78
   1   7  -1   41.52    2.94
  -1  -7   1   36.24    3.05
   1   7   0   99.34    6.05
   1   7   0  111.41    6.06
   1   7   0  109.98    6.21
  -1  -7   0  110.95    5.98
  -1  -7   0  116.89    6.39
   1   7   1    8.93    1.30
   1   7   1    8.40    1.19
   1   7   1    9.07    1.49
   1   7   1    4.88    1.54
   1   7   1    7.74    1.63
  -1  -7  -1    9.29    1.40
   1   7   1    9.34    1.47
   1   7   2   -0.06    1.14
   1   7   2    0.78    0.73
  -1  -7  -2    0.05    1.03
  -1  -7  -2    0.71    1.23
  -1  -7  -3   35.30    2.50
  -1  -7  -3   31.03    2.44
   1   7   3   39.97    2.91
   1   7   3   45.62    3.14
  -1  -7  -3   38.18    2.92
  -1  -7  -4    9.16    1.25
   1   7   4   11.68    1.63
  -1  -7  -4   12.22    1.17
  -1  -7  -4    9.15    1.59
   1   7   4   11.13    1.56
  -1  -7  -5    0.36    0.71
  -1  -7  -5    0.30    0.83
   1   7   5    0.13    1.22
   1   7   5   -0.28    0.85
  -1  -7  -6   48.40    3.12
  -1  -7  -6   51.29    3.54
  -1  -7  -6   45.34    3.24
  -1  -7  -6   43.74    3.31
   1   7   6   46.19    3.53
  -1  -7  -7   18.02    1.74
  -1  -7  -7   19.61    1.97
  -1  -7  -7   15.01    1.81
   1   7   7   16.06    1.96
   1   7   8    0.81    1.08
  -1  -7  -8    1.69    0.91
  -1  -7  -8    0.05    0.89
   1   7   9    3.51    1.00
  -1  -7  -9    2.88    0.82
  -1  -7  -9    4.58    0.97
   1   7  10    0.03    0.52
  -1  -7 -10   -0.09    0.59
   1   8  -5   18.14    1.66
   1   8  -5   13.34    1.25
   1   8  -4    7.35    1.14
   1   8  -4    5.34    0.83
   1   8  -4    5.96    1.02
  -1  -8   4    4.50    1.02
   1   8  -3   19.54    1.86
   1   8  -3   19.30    2.26
  -1  -8   3   18.65    1.89
   1   8  -3   18.87    2.01
   1   8  -3   18.47    1.83
   1   8  -3   19.67    1.86
   1   8  -3   15.45    1.57
   1   8  -2   16.75    2.24
   1   8  -2   19.42    1.96
   1   8  -2   16.42    1.93
   1   8  -2   14.62    1.71
  -1  -8   2   17.79    2.02
   1   8  -2   21.75    2.08
   1   8  -2   19.05    2.11
   1   8  -1    0.21    0.97
   1   8  -1    0.14    1.17
   1   8  -1    0.41    0.92
  -1  -8   1    0.24    1.22
   1   8  -1    0.56    0.94
   1   8   0    1.70    1.03
   1   8   0    0.84    1.35
  -1  -8   0    1.97    0.89
   1   8   0    1.34    1.13
   1   8   0    1.25    1.22
   1   8   0    1.86    1.01
  -1  -8  -1    5.21    1.52
   1   8   1    3.65    1.00
   1   8   1    3.34    0.97
  -1  -8  -1    3.32    1.05
   1   8   1    4.60    1.54
   1   8   1    3.84    1.28
   1   8   1    2.78    1.19
  -1  -8  -2    8.22    1.78
   1   8   2    7.80    1.20
  -1  -8  -2   10.36    1.57
   1   8   2    8.27    1.67
   1   8   2   11.82    1.87
  -1  -8  -3    0.61    1.10
  -1  -8  -3   -0.24    1.25
   1   8   3   -0.21    1.22
   1   8   3   -0.12    1.02
  -1  -8  -3    0.30    0.70
  -1  -8  -4    8.40    1.66
   1   8   4    8.31    1.67
  -1  -8  -4    5.72    1.04
  -1  -8  -4    8.72    1.65
   1   8   4    8.59    1.60
   1   8   5    0.11    1.00
   1   8   5   -0.58    1.24
   1   8   5   -0.61    1.04
  -1  -8  -5    0.71    0.77
  -1  -8  -5   -0.07    1.32
  -1  -8  -6    2.68    1.23
   1   8   6    3.13    1.36
   1   8   6    2.06    1.06
  -1  -8  -6    2.55    0.86
   1   8   7   -0.12    1.06
  -1  -8  -7    0.72    0.78
  -1  -8  -7    0.65    0.95
   1   8   7    0.18    0.81
  -1  -8  -7    0.11    1.05
  -1  -8  -8   26.08    1.96
  -1  -8  -8   27.77    2.12
   1   8   8   23.28    2.11
  -1  -8  -9    1.69    0.66
  -1  -8  -9    4.53    0.78
   1   8   9    3.28    0.81
   1   9  -4    1.81    0.65
   1   9  -4    3.21    0.94
   1   9  -4    1.31    0.54
   1   9  -3    5.35    0.94
   1   9  -3    2.30    0.63
  -1  -9   3    2.81    0.77
   1   9  -3    5.67    0.94
   1   9  -3    3.91    1.09
   1   9  -2    0.32    0.82
   1   9  -2   -0.04    0.69
   1   9  -2   -0.10    0.84
   1   9  -2    0.04    0.76
   1   9  -2    0.10    0.86
  -1  -9   2   -0.26    0.89
   1   9  -1   49.51    3.32
   1   9  -1   52.86    3.21
   1   9  -1   52.82    3.59
   1   9   0   19.42    1.71
   1   9   0   17.76    1.79
  -1  -9   0   17.66    1.95
   1   9   0   14.66    1.74
   1   9   0   20.18    2.00
   1   9   1    0.22    1.33
  -1  -9  -1    0.36    0.84
   1   9   1    1.17    1.01
   1   9   1   -0.12    0.72
   1   9   1    0.45    1.09
   1   9   2    8.16    1.50
  -1  -9  -2   10.42    1.46
  -1  -9  -2    7.96    1.22
  -1  -9  -2    9.21    1.60
   1   9   2   10.73    1.81
   1   9   2   10.04    1.57
   1   9   2    7.97    1.09
  -1  -9  -3   12.87    1.76
  -1  -9  -3    9.61    1.19
  -1  -9  -3   14.65    1.74
   1   9   3   15.08    1.80
  -1  -9  -4    0.78    1.14
   1   9   4    0.44    1.06
   1   9   4    1.99    1.17
  -1  -9  -4    0.78    1.22
   1   9   4    0.66    1.12
   1   9   5    0.92    1.04
   1   9   5   -0.35    0.90
   1   9   5   -0.45    0.94
  -1  -9  -5    0.06    1.05
   1   9   6    0.53    0.83
   1   9   6    0.21    0.96
   1   9   7    3.17    1.02
  -1  -9  -7    4.15    1.00
   1   9   7    2.79    0.76
  -1  -9  -7    4.09    1.04
  -1  -9  -8    5.86    0.94
  -1  -9  -8    8.58    1.04
   1   9   8    5.57    1.00
   1  10  -2   -0.28    0.54
   1  10  -2    0.51    0.63
  -1 -10   2   -0.23    0.65
   1  10  -2    0.31    0.49
   1  10  -1    2.81    0.70
   1  10  -1    3.80    1.03
  -1 -10   1    2.14    0.84
  -1 -10   1    2.88    0.75
   1  10  -1    2.79    0.68
   1  10   0    4.67    0.84
   1  10   0    5.13    1.01
  -1 -10   0    7.32    1.12
   1  10   0    6.74    1.15
  -1 -10   0    5.59    1.04
   1  10   0    6.81    1.33
   1  10   1   10.63    1.63
   1  10   1   10.38    1.36
  -1 -10  -1   10.36    1.34
  -1 -10  -1    6.55    1.04
   1  10   1    6.55    1.18
   1  10   2    1.11    1.10
   1  10   2    1.01    0.82
  -1 -10  -2    0.06    0.57
   1  10   2    0.86    0.86
  -1 -10  -2   -0.09    0.90
  -1 -10  -2    0.90    0.73
   1  10   3    0.40    0.85
  -1 -10  -3   -0.05    0.98
   1  10   3    1.73    1.14
  -1 -10  -3    0.72    0.82
   1  10   4    0.04    0.78
  -1 -10  -4    0.80    0.86
   1  10   4    0.22    0.93
  -1 -10  -4   -0.52    0.89
   1  10   5    2.68    0.93
  -1 -10  -5    2.02    0.94
  -1 -10  -5    3.93    1.02
   1  10   5    1.56    0.82
   1  10   5    3.06    0.92
   1  10   6    1.59    0.64
   1  10   6    1.55    0.81
  -1 -10  -6    1.59    0.81
   1  10   7    1.91    0.66
  -1 -10  -7    1.52    0.65
   1  11   1    5.18    0.74
  -1 -11  -1    5.41    0.78
   1  11   1    6.87    0.87
   1  11   2    9.29    1.04
   1  11   2   10.71    1.12
  -1 -11  -2   10.84    1.11
   1  11   3    0.96    0.60
   1  11   3    1.04    0.60
   1  11   3    1.27    0.78
  -1 -11  -3    0.73    0.59
   1  11   4    0.02    0.47
   1  11   4    1.62    0.69
  -1 -11  -4    1.10    0.52
  -1 -11  -4    0.65    0.57
  -2  10   5    7.94    0.94
   2 -10  -5   11.87    1.17
  -2  10   4    2.09    0.89
  -2  10   4    1.44    0.65
   2 -10  -4    1.77    0.64
   2 -10  -4    2.77    0.73
  -2  10   3    3.16    0.78
   2 -10  -3    2.73    0.67
   2 -10  -3    2.18    0.63
   2 -10  -3    2.48    0.71
  -2  10   3    4.16    1.12
   2 -10  -2    5.24    0.88
  -2  10   2    9.23    1.09
  -2  10   2   11.07    1.50
  -2  10   2    6.69    0.86
  -2  10   1   -0.42    0.51
  -2  10   1    0.61    0.65
  -2  10   1    0.51    0.95
   2 -10  -1    0.11    0.59
  -2  10   0   15.04    1.59
  -2  10   0   13.95    1.15
  -2  10   0   11.52    1.22
  -2  10  -1    2.03    0.53
   2  -9  -7    0.73    0.65
   2  -9  -7    0.59    0.65
  -2   9   6    2.23    0.66
   2  -9  -6    3.02    0.94
  -2   9   6    1.48    0.59
  -2   9   5    2.25    0.66
   2  -9  -5    4.69    1.14
   2  -9  -5    2.63    0.95
  -2   9   5    3.25    1.05
  -2   9   5    1.44    0.77
   2  -9  -5    1.90    0.63
  -2   9   4   91.24    5.02
   2  -9  -4   89.94    4.74
   2  -9  -4   73.69    4.38
  -2   9   4   74.35    4.41
   2  -9  -4   63.70    4.13
  -2   9   3  174.89    8.27
  -2   9   3  144.76    7.54
   2  -9  -3  165.95    7.71
  -2   9   3  122.61    7.19
   2  -9  -3  125.10    7.25
   2  -9  -3  141.93    7.39
   2  -9  -2    2.35    0.90
  -2   9   2    2.10    0.98
  -2   9   2    0.51    0.75
  -2   9   2    2.11    1.36
   2  -9  -2    1.96    0.81
   2  -9  -2    1.59    0.87
   2  -9  -1    0.98    0.60
  -2   9   1    2.10    1.44
   2  -9  -1    0.88    0.73
   2  -9  -1    0.13    0.89
  -2   9   1    2.65    1.08
  -2   9   1    1.37    0.89
  -2   9   0    0.92    0.82
  -2   9   0    0.27    0.86
  -2   9  -1   25.73    2.11
  -2   9  -1   25.84    2.04
  -2   9  -1   28.48    2.49
  -2   9  -2    9.03    1.34
   2  -9   2    7.11    1.14
  -2   9  -2   10.87    1.17
  -2   9  -2    9.51    1.03
  -2   9  -3   11.47    1.05
  -2   9  -3   14.30    1.20
   2  -8  -8    1.16    0.59
  -2   8   8    0.77    0.63
   2  -8  -8    1.60    0.76
   2  -8  -8    0.92    0.65
  -2   8   7    1.62    0.65
   2  -8  -7    2.09    0.95
   2  -8  -7    0.84    0.90
  -2   8   7    2.78    0.83
   2  -8  -7    1.13    0.66
  -2   8   6    0.74    0.81
   2  -8  -6    0.91    0.69
   2  -8  -6    1.00    1.00
  -2   8   6    1.26    0.81
   2  -8  -5    8.60    1.15
  -2   8   5    8.26    1.34
  -2   8   5    9.57    1.35
  -2   8   5   12.08    1.66
   2  -8  -5   11.20    1.73
   2  -8  -5   10.96    1.55
   2  -8  -4  177.80    9.86
  -2   8   4  233.63   10.81
   2  -8  -4  224.22   10.24
   2  -8  -4  234.04   10.59
  -2   8   4  182.52    9.99
  -2   8   4  164.12    9.72
  -2   8   4  202.46   10.18
  -2   8   3   57.81    3.66
   2  -8  -3   58.67    3.79
   2  -8  -3   54.59    3.75
   2  -8  -3   63.98    4.10
  -2   8   3   54.91    3.66
  -2   8   3   61.35    3.95
  -2   8   2   18.33    1.93
   2  -8  -2   11.14    1.29
  -2   8   2   14.16    1.57
   2  -8  -2   12.32    1.68
  -2   8   2   17.17    2.33
   2  -8  -2   17.07    1.85
   2  -8  -2   16.47    1.70
  -2   8   1    2.63    1.16
   2  -8  -1    3.91    1.03
   2  -8  -1    3.60    0.95
  -2   8   1    5.32    1.62
   2  -8  -1    3.23    1.30
  -2   8   1    3.37    1.05
  -2   8   0    0.29    0.65
  -2   8   0    1.57    1.11
   2  -8   0    1.59    0.79
  -2   8   0    1.10    0.97
  -2   8  -1   17.14    1.59
   2  -8   1   15.68    1.93
  -2   8  -1   17.38    2.21
  -2   8  -1   16.56    1.92
  -2   8  -1   17.35    1.84
  -2   8  -2   62.67    3.83
  -2   8  -2   62.81    4.17
  -2   8  -2   49.75    4.02
  -2   8  -2   63.64    3.71
   2  -8   3   19.44    1.99
  -2   8  -3   22.97    2.34
  -2   8  -3   22.30    2.11
  -2   8  -3   26.80    2.07
  -2   8  -3   28.63    2.02
  -2   8  -4    8.74    1.15
  -2   8  -4   11.27    1.25
  -2   8  -4   12.13    1.26
   2  -8   4    7.40    1.12
  -2   8  -5    6.82    0.82
  -2   8  -5    7.51    0.92
   2  -7  -9   -0.23    0.61
   2  -7  -8    2.52    0.89
   2  -7  -8    2.12    0.99
   2  -7  -8    3.96    0.93
   2  -7  -7    1.88    0.95
  -2   7   7    0.90    0.73
   2  -7  -7    0.48    1.05
   2  -7  -7    1.32    1.01
   2  -7  -6   71.34    4.17
   2  -7  -6   73.13    4.51
   2  -7  -6   70.12    4.35
   2  -7  -5   42.30    3.04
  -2   7   5   41.86    3.17
   2  -7  -5   43.99    3.30
   2  -7  -5   39.81    2.76
  -2   7   5   41.22    2.93
   2  -7  -5   31.34    2.58
  -2   7   4   82.44    5.03
  -2   7   4   65.84    4.28
   2  -7  -4   88.23    5.00
   2  -7  -4   77.12    4.39
   2  -7  -4   74.46    4.46
  -2   7   4   75.47    4.64
   2  -7  -4   83.97    4.75
  -2   7   3   20.07    2.36
   2  -7  -3   14.59    1.78
  -2   7   3   16.17    1.82
   2  -7  -3   16.71    2.14
  -2   7   3   18.26    1.74
  -2   7   3   18.49    2.03
   2  -7  -3   15.33    1.89
  -2   7   2  101.86    5.77
   2  -7  -2   90.12    5.80
  -2   7   2   96.82    5.76
   2  -7  -2  108.11    5.85
   2  -7  -2  112.56    6.05
  -2   7   2  108.44    5.98
  -2   7   2  119.61    6.47
  -2   7   1   -0.14    0.87
  -2   7   1    0.07    1.31
  -2   7   1    0.26    1.04
   2  -7  -1    0.53    0.84
   2  -7  -1    0.64    0.90
   2  -7   0    9.55    1.25
  -2   7   0   11.23    1.59
   2  -7   0   10.77    1.29
  -2   7   0   10.90    1.42
  -2   7   0   12.01    1.24
  -2   7   0    9.79    1.65
  -2   7  -1    4.63    0.98
  -2   7  -1    4.00    1.25
   2  -7   1    3.82    0.89
  -2   7  -1    4.43    1.50
  -2   7  -1    5.10    1.59
  -2   7  -1    6.13    1.26
  -2   7  -2   87.94    5.35
  -2   7  -2   90.95    5.18
  -2   7  -2   92.96    5.74
  -2   7  -2   93.63    5.37
  -2   7  -2   85.85    5.59
  -2   7  -3   64.95    4.09
  -2   7  -3   62.96    4.49
  -2   7  -3   59.88    4.20
  -2   7  -3   67.51    4.04
  -2   7  -4    2.48    0.98
  -2   7  -4    1.09    0.93
  -2   7  -4    0.93    1.35
  -2   7  -4    1.49    0.92
  -2   7  -5    0.40    0.75
  -2   7  -5   -0.52    0.89
  -2   7  -6    1.01    0.70
  -2   7  -6    1.70    0.64
  -2   7  -6    2.63    0.76
   2  -6 -10    7.89    1.02
   2  -6 -10   13.55    1.14
   2  -6  -9    7.99    1.18
   2  -6  -9    6.37    0.95
   2  -6  -8    2.20    1.03
   2  -6  -8    0.64    0.74
   2  -6  -8    1.16    0.82
   2  -6  -7   97.22    5.53
   2  -6  -7   98.20    5.63
   2  -6  -7  110.84    5.77
   2  -6  -6  244.82   11.44
   2  -6  -6  229.29   11.45
   2  -6  -6  231.03   11.23
   2  -6  -6  201.60   10.90
  -2   6   6  197.28   11.06
  -2   6   5    6.62    1.28
   2  -6  -5   12.20    1.65
  -2   6   5    9.53    1.51
   2  -6  -5    7.10    1.17
   2  -6  -5   10.54    1.39
   2  -6  -4   10.20    1.47
   2  -6  -4   10.63    1.27
   2  -6  -4    9.90    1.52
  -2   6   4    7.90    1.09
   2  -6  -4   10.05    1.23
  -2   6   4   11.66    1.59
  -2   6   4    7.86    1.32
   2  -6  -3   63.92    3.72
  -2   6   3   58.92    3.72
  -2   6   3   70.56    4.31
   2  -6  -3   66.42    3.94
   2  -6  -3   72.11    4.17
   2  -6  -3   60.07    3.83
  -2   6   3   66.28    4.02
  -2   6   2    4.72    1.26
   2  -6  -2    3.96    1.06
  -2   6   2    3.80    0.88
   2  -6  -2    7.70    1.12
  -2   6   2    3.32    1.02
  -2   6   2    3.15    0.93
   2  -6  -2    5.04    1.10
  -2   6   1   60.93    4.23
   2  -6  -1   65.67    4.03
  -2   6   1   72.37    4.13
   2  -6  -1   74.33    4.20
  -2   6   1   71.98    4.10
  -2   6   1   75.41    4.55
  -2   6   1   69.36    4.20
  -2   6   0   13.99    1.59
  -2   6   0   14.90    1.33
  -2   6   0   15.56    1.78
   2  -6   0   14.85    1.45
  -2   6   0   15.33    1.51
   2  -6   1  184.60    9.93
  -2   6  -1  200.02   10.51
  -2   6  -1  200.43   10.06
  -2   6  -1  198.34   10.21
  -2   6  -1  203.69   10.54
  -2   6  -1  210.98   10.32
  -2   6  -2   52.81    3.78
  -2   6  -2   57.24    3.61
  -2   6  -2   54.17    3.64
  -2   6  -2   53.75    3.83
  -2   6  -2   54.08    3.44
  -2   6  -3   44.38    3.38
  -2   6  -3   42.67    3.03
  -2   6  -3   40.04    3.13
  -2   6  -3   42.48    2.93
  -2   6  -4   11.81    1.63
  -2   6  -4   16.38    2.18
  -2   6  -4   17.23    1.90
  -2   6  -4   18.86    1.86
  -2   6  -5    0.79    0.92
  -2   6  -5    1.27    1.02
  -2   6  -6    7.41    1.19
  -2   6  -6    8.34    1.45
  -2   6  -7    0.45    0.59
  -2   6  -7    0.38    0.64
  -2   6  -7   -0.37    0.73
   2  -5 -10   97.43    4.84
   2  -5 -10   93.70    4.87
   2  -5  -9   13.42    1.48
   2  -5  -9   11.47    1.54
   2  -5  -9   10.54    1.54
   2  -5  -8   13.15    1.64
   2  -5  -8    9.37    1.38
   2  -5  -8    9.98    1.36
   2  -5  -7   53.05    3.34
   2  -5  -7   50.97    3.34
   2  -5  -7   60.01    3.56
   2  -5  -7   56.50    3.29
   2  -5  -6   31.16    2.45
   2  -5  -6   30.02    2.30
   2  -5  -6   32.40    2.59
   2  -5  -6   36.81    2.69
  -2   5   6   28.30    2.31
   2  -5  -5    3.95    0.94
  -2   5   5    2.78    0.93
   2  -5  -5    2.30    1.03
   2  -5  -5    2.82    0.84
   2  -5  -5    4.19    1.16
   2  -5  -5    2.09    0.75
  -2   5   4    8.96    1.27
  -2   5   4    7.52    1.13
   2  -5  -4    8.65    1.10
   2  -5  -4    7.53    1.08
   2  -5  -4    8.37    1.24
   2  -5  -4    8.20    0.97
  -2   5   3    9.22    1.16
   2  -5  -3    7.98    0.98
  -2   5   3    5.79    0.87
   2  -5  -3    7.16    1.20
  -2   5   3    8.67    1.29
   2  -5  -3    7.58    1.08
   2  -5  -3   10.59    1.21
   2  -5  -3    6.98    0.81
   2  -5  -2   87.88    4.70
   2  -5  -2   82.56    4.85
  -2   5   2   82.34    4.73
   2  -5  -2   95.11    5.01
  -2   5   2   95.29    5.16
   2  -5  -2   91.07    4.85
  -2   5   2   89.20    6.34
  -2   5   2   90.21    4.94
   2  -5  -1    5.45    0.91
  -2   5   1    3.98    1.44
  -2   5   1    5.93    1.00
  -2   5   1    5.20    0.92
  -2   5   1    6.53    1.12
  -2   5   1    6.05    1.18
  -2   5   1    5.60    0.88
   2  -5  -1    5.00    0.93
  -2   5   0    9.50    1.12
   2  -5   0   10.13    1.09
  -2   5   0    8.74    1.30
   2  -5   0    9.77    1.10
  -2   5   0   10.09    1.23
  -2   5   0    8.87    0.94
  -2   5   0    9.30    1.12
   2  -5   1   68.52    4.14
  -2   5  -1   87.38    4.71
  -2   5  -1   75.25    4.50
  -2   5  -1   63.80    5.13
  -2   5  -1   80.81    4.28
  -2   5  -1   82.27    4.39
  -2   5  -1   77.51    4.45
  -2   5  -2   15.76    1.56
  -2   5  -2   16.18    1.49
  -2   5  -2   12.94    1.66
  -2   5  -2   15.13    1.73
  -2   5  -2   13.87    1.56
  -2   5  -3   68.62    4.09
  -2   5  -3   73.65    4.21
  -2   5  -3   62.36    4.33
  -2   5  -3   65.73    4.23
  -2   5  -4    0.24    0.90
  -2   5  -4    0.46    0.99
  -2   5  -4    0.61    1.19
  -2   5  -4    0.56    0.87
  -2   5  -5   13.23    1.66
  -2   5  -5   12.93    1.40
  -2   5  -5   12.34    1.82
  -2   5  -5   14.86    1.75
  -2   5  -6    1.68    0.97
  -2   5  -6    1.96    0.69
  -2   5  -6    1.67    1.24
  -2   5  -7   -0.04    0.79
  -2   5  -7   -0.10    0.87
  -2   5  -7    0.19    0.86
  -2   5  -7    0.18    0.88
  -2   5  -8    0.71    0.76
  -2   5  -8    0.54    0.57
  -2   5  -8    0.53    0.67
   2  -4 -10    4.08    0.96
   2  -4 -10    4.61    1.01
   2  -4 -10    6.07    0.99
   2  -4  -9   74.57    4.29
   2  -4  -9   71.45    4.26
   2  -4  -8  429.96   21.21
   2  -4  -7   64.25    3.75
   2  -4  -7   64.01    3.81
   2  -4  -7   65.15    3.82
  -2   4   6    5.54    1.04
   2  -4  -6    5.58    0.95
   2  -4  -6    7.51    1.20
   2  -4  -6    7.79    1.25
   2  -4  -6    8.47    1.19
   2  -4  -5    8.23    1.04
   2  -4  -5   10.94    1.34
  -2   4   5    6.37    1.02
   2  -4  -5    6.96    1.15
   2  -4  -5    6.74    1.07
   2  -4  -5    9.93    1.12
   2  -4  -4  526.00   26.44
   2  -4  -4  553.69   26.50
   2  -4  -4  565.57   26.45
   2  -4  -4  606.72   26.63
   2  -4  -4  558.25   26.64
  -2   4   4  541.38   26.62
  -2   4   4  539.52   26.51
   2  -4  -4  534.22   27.54
  -2   4   4  559.25   28.29
   2  -4  -3  339.52   16.38
   2  -4  -3  344.54   18.15
   2  -4  -3  367.24   16.50
   2  -4  -3  360.40   16.58
  -2   4   3  353.09   17.99
   2  -4  -3  342.49   16.41
   2  -4  -3  350.62   16.35
  -2   4   3  290.07   16.22
  -2   4   3  335.11   16.45
  -2   4   3  357.10   16.63
   2  -4  -2   20.77    2.78
   2  -4  -2   19.93    1.40
   2  -4  -2   16.38    1.51
  -2   4   2   16.93    1.33
  -2   4   2   21.00    1.55
   2  -4  -2   21.92    1.52
   2  -4  -2   17.89    1.55
  -2   4   2   18.81    1.62
  -2   4   1  860.39   42.17
   2  -4  -1  945.44   44.56
  -2   4   1  848.15   42.37
   2  -4  -1  890.68   42.29
  -2   4   1  922.25   42.48
   2  -4  -1  909.42   42.19
  -2   4   1  912.95   42.29
  -2   4   1  938.08   43.48
   2  -4   0  472.75   23.07
  -2   4   0  480.63   23.06
  -2   4   0  515.88   23.20
  -2   4   0  481.00   23.25
  -2   4   0  447.98   22.95
  -2   4   0  511.42   23.18
  -2   4   0  521.56   24.23
   2  -4   0  481.32   23.01
  -2   4  -1 1893.52   81.65
  -2   4  -1 1727.43   78.61
  -2   4  -1 1700.07   78.40
   2  -4   1 1568.92   78.24
  -2   4  -1 1723.03   78.46
  -2   4  -1 1662.93   78.54
  -2   4  -1 1613.66   79.20
  -2   4  -1 1669.34   78.30
  -2   4  -2  329.72   18.85
  -2   4  -2  320.77   17.71
  -2   4  -2  377.07   17.36
  -2   4  -2  350.39   17.50
  -2   4  -2  351.06   17.43
  -2   4  -2  360.41   17.46
  -2   4  -2  363.40   17.26
  -2   4  -2  364.50   17.36
  -2   4  -3    0.80    0.71
  -2   4  -3    0.97    0.76
  -2   4  -3   -0.12    0.76
  -2   4  -3    1.06    0.70
  -2   4  -3    0.51    0.83
  -2   4  -4   39.18    2.67
  -2   4  -4   31.93    2.52
  -2   4  -4   37.80    2.75
  -2   4  -4   38.50    2.81
  -2   4  -4   42.10    2.71
  -2   4  -5   16.77    1.88
  -2   4  -5   14.71    1.72
  -2   4  -5   13.76    1.67
  -2   4  -6    1.00    1.09
  -2   4  -6    0.69    1.04
  -2   4  -6    1.11    1.06
  -2   4  -6    0.09    0.74
  -2   4  -7   88.54    4.94
  -2   4  -7   83.45    4.97
  -2   4  -7   77.23    4.91
  -2   4  -7   76.50    4.58
  -2   4  -7   85.37    4.95
  -2   4  -8   27.23    2.11
  -2   4  -8   27.66    2.22
  -2   4  -8   24.57    2.16
   2  -3 -10    2.56    0.88
   2  -3 -10    2.98    0.79
   2  -3 -10    3.66    0.97
   2  -3  -9  180.62   10.32
   2  -3  -9  208.42   10.39
   2  -3  -9  212.66   10.52
   2  -3  -8  113.00    6.37
   2  -3  -8  104.17    6.35
   2  -3  -8  110.50    6.25
   2  -3  -7    9.60    1.23
   2  -3  -7   14.15    1.38
   2  -3  -7   13.37    1.58
   2  -3  -6   39.75    2.63
  -2   3   6   37.90    2.64
   2  -3  -6   44.33    2.84
   2  -3  -6   45.55    2.81
   2  -3  -5   44.26    2.86
   2  -3  -5   44.75    2.79
   2  -3  -5   48.65    2.87
   2  -3  -5   42.92    2.81
   2  -3  -5   50.30    3.01
  -2   3   5   48.72    4.11
  -2   3   5   43.22    2.76
  -2   3   4  475.05   24.15
   2  -3  -4  500.35   24.17
   2  -3  -4  496.09   24.19
   2  -3  -4  545.59   24.33
   2  -3  -4  502.55   24.74
   2  -3  -4  509.55   24.31
  -2   3   4  499.81   25.55
   2  -3  -4  526.74   24.20
   2  -3  -3    6.35    0.83
   2  -3  -3    5.85    0.82
  -2   3   3    9.18    1.69
  -2   3   3    6.86    0.95
  -2   3   3    7.86    2.13
   2  -3  -3    7.99    0.94
   2  -3  -3    7.42    0.84
   2  -3  -3    6.83    1.51
   2  -3  -2  141.88    8.04
   2  -3  -2  134.20    6.73
  -2   3   2  137.88    8.64
   2  -3  -2  139.83    6.81
  -2   3   2  121.23    7.61
   2  -3  -2  130.76    6.71
  -2   3   1  656.93   30.55
   2  -3  -1  601.42   29.70
  -2   3   1  599.40   28.24
   2  -3  -1  576.77   28.09
  -2   3   0  302.16   15.20
   2  -3   0  298.62   14.46
  -2   3   0  270.40   13.32
  -2   3  -1 1064.21   51.27
  -2   3  -1 1122.63   51.87
  -2   3  -1 1104.01   51.23
  -2   3  -1 1207.85   51.34
  -2   3  -1 1080.53   51.38
  -2   3  -1 1043.37   51.33
  -2   3  -1 1064.17   51.17
   2  -3   1 1258.30   53.43
  -2   3  -1 1009.43   51.36
  -2   3  -2   11.09    1.27
  -2   3  -2   13.08    1.31
  -2   3  -2   12.59    1.43
  -2   3  -2   15.82    2.29
  -2   3  -2   14.01    1.32
  -2   3  -2   14.37    1.23
   2  -3   2   11.87    2.18
  -2   3  -2   13.87    1.19
  -2   3  -2   15.20    1.28
  -2   3  -3 1496.12   69.87
  -2   3  -3 1455.00   69.96
  -2   3  -3 1520.53   69.91
  -2   3  -3 1493.05   69.92
  -2   3  -3 1535.61   70.01
  -2   3  -3 1414.51   69.91
  -2   3  -4    9.17    0.90
  -2   3  -4   11.22    1.22
  -2   3  -4    9.95    1.21
  -2   3  -4   10.13    1.23
   2  -3   4   12.95    1.79
  -2   3  -4   10.35    1.27
  -2   3  -5   15.68    1.54
  -2   3  -5   15.95    1.28
  -2   3  -5   15.88    1.65
  -2   3  -6  161.37    8.12
  -2   3  -6  157.75    8.10
  -2   3  -6  131.86    7.76
  -2   3  -6  132.78    7.49
  -2   3  -6  164.67    8.07
  -2   3  -6  150.03    8.03
  -2   3  -6  165.01    8.08
  -2   3  -7   18.16    1.95
  -2   3  -7   17.88    2.01
  -2   3  -7   15.45    1.83
  -2   3  -7   18.51    1.76
  -2   3  -7   15.60    1.75
  -2   3  -8   21.84    2.07
  -2   3  -8   24.15    2.19
  -2   3  -8   20.70    1.78
  -2   3  -8   18.21    1.94
  -2   3  -9    0.82    0.85
  -2   3  -9    1.29    0.77
   2  -2 -10   10.90    1.29
   2  -2 -10    8.83    1.05
   2  -2  -9   49.84    3.23
   2  -2  -9   51.07    3.44
   2  -2  -9   44.88    3.31
   2  -2  -8   46.48    3.09
   2  -2  -8   46.15    2.94
   2  -2  -8   42.03    3.00
   2  -2  -7    9.43    1.28
   2  -2  -7   12.35    1.51
   2  -2  -7   17.49    1.68
   2  -2  -7   15.35    1.73
   2  -2  -6  142.54    7.15
   2  -2  -6  130.37    7.01
   2  -2  -6  130.82    6.98
   2  -2  -6  140.06    7.17
   2  -2  -5  307.49   13.80
   2  -2  -5  278.95   13.62
   2  -2  -5  263.68   13.59
   2  -2  -5  270.04   13.62
  -2   2   5  278.84   14.77
   2  -2  -4   14.26    1.24
   2  -2  -4   15.33    1.27
   2  -2  -4   15.48    1.27
   2  -2  -4   16.09    1.37
  -2   2   4   16.13    1.97
   2  -2  -4   15.98    1.26
   2  -2  -4   14.93    1.28
  -2   2   3  188.27   10.56
   2  -2  -3  164.51    7.51
   2  -2  -3  125.89    6.77
   2  -2  -3  136.33    6.79
   2  -2  -3  143.54    6.84
   2  -2  -3  135.90    6.79
  -2   2   3  155.14    7.85
   2  -2  -3  121.54    6.83
  -2   2   2 6591.10  320.22
   2  -2  -2 6673.85  319.76
  -2   2   2 7144.37  319.69
  -2   2   1  347.27   17.56
  -2   2   1  363.52   18.44
   2  -2  -1  362.76   18.00
  -2   2   0 1173.58   52.24
   2  -2   0 1105.01   51.73
  -2   2   0 1019.86   50.93
  -2   2  -1   23.43    2.90
   2  -2   1   22.58    2.49
  -2   2  -1   19.07    1.70
  -2   2  -2 3071.96  142.99
   2  -2   2 3278.02  143.64
  -2   2  -2 3143.27  142.35
  -2   2  -2 2961.41  142.08
  -2   2  -2 2995.08  142.11
  -2   2  -3 2095.22   99.55
  -2   2  -3 2078.10   99.59
  -2   2  -3 2108.90   99.54
  -2   2  -3 2153.46   99.56
   2  -2   3 2187.89  101.02
  -2   2  -3 2162.31   99.55
  -2   2  -4    2.88    0.79
  -2   2  -4    2.25    0.74
   2  -2   4    3.81    1.19
  -2   2  -4    3.20    0.70
  -2   2  -5    6.04    1.01
  -2   2  -5    7.58    0.94
  -2   2  -5    5.02    0.79
  -2   2  -5    6.43    1.01
  -2   2  -6    1.39    0.63
  -2   2  -6    1.50    0.94
  -2   2  -6    1.61    0.83
  -2   2  -6    0.14    0.63
  -2   2  -6    1.12    0.79
  -2   2  -6    1.04    0.86
  -2   2  -6    0.63    0.98
  -2   2  -7   10.63    1.48
  -2   2  -7   10.54    1.65
  -2   2  -7   10.95    1.24
  -2   2  -7   11.47    1.62
  -2   2  -7   10.74    1.54
  -2   2  -7    8.78    1.31
  -2   2  -8   73.39    4.34
  -2   2  -8   59.59    3.76
  -2   2  -8   73.87    4.19
  -2   2  -8   54.74    4.05
  -2   2  -8   67.79    4.33
  -2   2  -9   15.08    1.64
  -2   2  -9   13.58    1.68
  -2   2  -9   13.85    1.41
   2  -1 -10    2.71    0.90
   2  -1 -10    2.70    0.95
   2  -1 -10    2.49    0.85
   2  -1  -9   13.15    1.33
   2  -1  -9   13.20    1.65
   2  -1  -9    9.88    1.47
   2  -1  -8   44.05    2.72
   2  -1  -8   39.54    2.86
   2  -1  -7  101.14    5.31
   2  -1  -7   96.83    5.45
   2  -1  -7   88.84    5.21
   2  -1  -7   92.04    5.42
   2  -1  -6    2.74    0.79
   2  -1  -6    1.64    0.86
   2  -1  -5   76.39    4.13
   2  -1  -5   74.40    4.01
   2  -1  -5   73.22    4.15
   2  -1  -5   76.19    4.22
   2  -1  -5   75.74    4.13
  -2   1   5   73.67    4.81
   2  -1  -4  757.68   35.27
   2  -1  -4  758.09   35.29
   2  -1  -4  800.58   35.38
   2  -1  -4  743.45   35.33
   2  -1  -4  754.07   35.31
   2  -1  -4  740.03   35.22
  -2   1   4  850.55   36.23
   2  -1  -3  461.86   21.65
  -2   1   3  458.23   22.11
  -2   1   3  424.57   22.07
  -2   1   2  529.29   24.91
  -2   1   2  452.40   23.43
   2  -1  -2  504.07   23.17
  -2   1   2  457.94   23.21
  -2   1   1   44.35    3.35
  -2   1   1   46.92    2.93
   2  -1   0  415.07   20.37
  -2   1   0  412.19   20.56
   2  -1   1   88.00    5.26
  -2   1  -2  332.62   15.82
  -2   1  -2  313.89   14.86
   2  -1   2  298.04   15.11
  -2   1  -2  280.12   14.38
  -2   1  -3    5.31    0.83
  -2   1  -3    6.89    0.80
   2  -1   3    5.29    1.31
  -2   1  -3    4.40    0.64
  -2   1  -4    7.73    0.97
  -2   1  -4    8.62    0.93
  -2   1  -4    7.26    0.99
  -2   1  -4    6.49    0.86
  -2   1  -4    5.61    0.93
   2  -1   4    9.02    1.33
  -2   1  -5  139.81    6.92
  -2   1  -5  124.33    6.82
  -2   1  -5  131.25    6.70
  -2   1  -5  140.62    6.94
  -2   1  -6   40.00    2.75
  -2   1  -6   35.24    2.30
  -2   1  -6   42.87    2.82
  -2   1  -6   40.95    2.60
  -2   1  -6   40.70    2.78
  -2   1  -6   35.34    2.46
  -2   1  -6   40.13    2.68
  -2   1  -7    3.88    1.06
  -2   1  -7    1.39    1.02
  -2   1  -7    1.58    1.19
  -2   1  -7    0.44    1.10
  -2   1  -7    1.41    0.85
  -2   1  -8   51.71    3.47
  -2   1  -8   59.60    3.94
  -2   1  -8   54.86    3.88
  -2   1  -8   50.38    3.62
  -2   1  -8   64.68    3.87
  -2   1  -9  266.68   13.46
  -2   1  -9  244.13   13.43
  -2   1  -9  276.84   13.37
  -2   1 -10    1.54    0.67
  -2   1 -10    1.46    0.51
  -2   1 -10    0.88    0.78
   2   0 -10    1.58    0.72
   2   0 -10    1.94    0.76
   2   0 -10    1.91    0.73
   2   0 -10    2.07    0.83
   2   0  -9    9.17    1.53
   2   0  -9   11.78    1.52
   2   0  -9   12.57    1.51
   2   0  -8   83.71    4.96
   2   0  -8   78.41    4.58
   2   0  -8   75.82    4.67
   2   0  -7   45.66    2.96
   2   0  -7   45.28    3.10
   2   0  -7   53.59    3.26
   2   0  -7   45.98    3.08
   2   0  -7   51.27    3.29
   2   0  -6   91.19    4.92
   2   0  -6   99.63    5.12
   2   0  -6   90.73    5.06
   2   0  -6   91.35    5.09
   2   0  -6   81.58    4.83
   2   0  -6  101.77    5.25
   2   0  -5    1.83    0.69
   2   0  -5    2.91    0.65
   2   0  -5    2.15    0.62
   2   0  -5    4.06    0.75
   2   0  -5    3.25    0.75
  -2   0   4  879.22   43.17
   2   0  -4  903.72   41.67
  -2   0   4  740.18   41.88
   2   0  -4  869.64   41.72
  -2   0   4  955.17   42.29
   2   0  -4  883.81   41.73
   2   0  -4  945.05   41.79
   2   0  -4  899.73   41.72
   2   0  -3  952.54   44.05
  -2   0   3  856.76   45.29
  -2   0   3  965.60   44.31
  -2   0   3  903.09   44.28
  -2   0   2 1186.00   56.50
   2   0  -2 1205.91   56.23
  -2   0   2 1182.62   56.38
  -2   0   1  497.82   24.03
  -2   0   0  330.15   16.39
   2   0   0  335.42   16.22
   2   0   1  575.15   27.58
   2   0   2    0.24    1.50
  -2   0  -2   -0.24    0.98
   2   0   2    1.09    0.74
  -2   0  -2    0.11    1.02
   2   0   3    1.66    1.34
  -2   0  -3    2.68    0.84
  -2   0  -3    2.58    1.28
   2   0   3    1.70    0.69
  -2   0  -4  411.69   19.97
  -2   0  -4  375.81   20.94
  -2   0  -4  426.41   20.00
  -2   0  -4  430.54   20.07
   2   0   4  405.72   20.21
  -2   0  -4  435.80   20.07
  -2   0  -4  416.60   20.08
  -2   0  -5    4.63    0.76
  -2   0  -5    3.84    0.83
  -2   0  -5    4.02    0.82
  -2   0  -6  165.43    8.86
  -2   0  -6  164.67    8.60
  -2   0  -6  186.90    8.83
  -2   0  -6  169.97    8.94
  -2   0  -6  167.79    8.81
  -2   0  -7    4.87    1.24
  -2   0  -7    6.58    0.93
  -2   0  -7    5.57    1.29
  -2   0  -7    6.36    1.40
  -2   0  -7    8.08    1.23
  -2   0  -8   57.12    4.08
  -2   0  -8   56.76    3.47
  -2   0  -8   66.39    3.91
  -2   0  -8   55.60    4.13
  -2   0  -8   66.87    4.11
  -2   0  -9   -0.06    1.15
  -2   0  -9    0.75    0.85
  -2   0  -9    0.50    0.97
  -2   0  -9    0.88    1.17
  -2   0 -10   42.49    2.70
  -2   0 -10   44.04    2.58
   2   1 -10    9.01    0.89
   2   1 -10    6.64    0.91
   2   1 -10    8.46    1.03
   2   1  -9    7.55    1.31
   2   1  -9    9.46    1.22
   2   1  -9    9.12    1.37
   2   1  -9    8.40    1.27
   2   1  -8   68.94    4.13
   2   1  -8   73.83    4.33
   2   1  -8   60.88    4.00
   2   1  -8   65.93    4.20
   2   1  -7   11.48    1.49
   2   1  -7   10.29    1.31
   2   1  -7   11.12    1.26
   2   1  -7   10.31    1.40
   2   1  -7   10.29    1.17
   2   1  -6  126.29    6.36
   2   1  -6  113.45    6.23
   2   1  -6  115.41    6.29
   2   1  -6  127.78    6.52
   2   1  -6  111.06    6.09
   2   1  -6  127.64    6.48
   2   1  -5  523.72   25.88
   2   1  -5  561.77   26.04
   2   1  -5  498.20   25.95
   2   1  -5  591.61   26.21
   2   1  -5  582.96   26.21
   2   1  -5  546.18   26.08
  -2  -1   4 1405.39   64.31
  -2  -1   4 1309.79   63.22
  -2  -1   4 1239.86   63.50
   2   1  -4 1393.86   63.11
   2   1  -4 1317.57   62.98
   2   1  -4 1433.86   63.09
  -2  -1   4 1260.77   63.36
  -2  -1   3 2647.26  122.62
  -2  -1   3 2525.26  122.95
   2   1  -3 2554.84  122.20
  -2  -1   3 2631.61  122.52
   2   1  -3 2723.61  122.60
   2   1  -2    1.03    1.92
  -2  -1   2    1.98    0.79
   2   1  -2    2.13    0.67
  -2  -1   2    1.80    1.23
  -2  -1   1   14.87    1.42
  -2  -1   1   17.56    1.99
   2   1   0  540.30   26.38
  -2  -1   0  543.77   26.09
   2   1   0  519.90   25.68
  -2  -1   0  551.94   25.76
   2   1   1 9999.00  467.37
  -2  -1  -2    5.25    1.22
   2   1   2    5.48    1.50
  -2  -1  -2    4.75    1.02
   2   1   2    4.75    0.83
   2   1   3   90.11    5.18
  -2  -1  -3   98.88    4.96
   2   1   3   83.04    4.48
  -2  -1  -4    6.75    0.83
  -2  -1  -4    5.90    1.08
  -2  -1  -4    6.07    0.80
  -2  -1  -4    5.32    0.84
   2   1   4    5.29    0.68
  -2  -1  -4    4.15    0.84
  -2  -1  -4    6.08    0.83
   2   1   4    5.81    1.48
  -2  -1  -5  274.85   13.31
  -2  -1  -5  290.29   13.45
  -2  -1  -5  277.12   13.49
  -2  -1  -5  242.29   13.30
  -2  -1  -5  279.59   13.31
   2   1   5  277.69   14.11
  -2  -1  -6   36.47    2.45
  -2  -1  -6   39.26    2.65
  -2  -1  -6   36.10    2.75
  -2  -1  -6   35.19    2.54
  -2  -1  -7    3.55    0.86
  -2  -1  -7    3.46    1.25
  -2  -1  -7    4.32    1.11
  -2  -1  -7    4.19    1.32
  -2  -1  -8    5.56    1.56
  -2  -1  -8    5.94    1.60
  -2  -1  -8    6.47    1.05
  -2  -1  -8    8.74    1.38
  -2  -1  -9    5.99    1.55
  -2  -1  -9    6.86    1.00
  -2  -1  -9    6.57    1.28
  -2  -1  -9    5.20    1.53
  -2  -1 -10    8.83    1.21
  -2  -1 -10    9.80    1.35
  -2  -1 -11    1.00    0.53
   2   2  -9   28.68    2.22
   2   2  -9   30.49    2.23
   2   2  -9   29.65    2.22
   2   2  -8   50.78    3.36
   2   2  -8   52.45    3.32
   2   2  -8   42.00    2.91
   2   2  -8   49.39    3.40
   2   2  -8   46.35    3.18
   2   2  -8   51.68    3.09
   2   2  -7    9.75    1.53
   2   2  -7    9.29    1.20
   2   2  -7   11.92    1.58
   2   2  -7    9.33    1.38
   2   2  -7    9.14    1.40
   2   2  -7    9.65    1.19
   2   2  -6    1.24    0.61
   2   2  -6    3.72    0.81
   2   2  -6    1.67    0.82
   2   2  -6    0.67    0.98
   2   2  -6    1.96    0.93
   2   2  -6    1.34    0.59
   2   2  -6    2.57    1.02
   2   2  -5  155.41    7.79
   2   2  -5  151.78    7.88
   2   2  -5  161.96    8.12
   2   2  -5  139.13    7.76
   2   2  -5  164.05    7.90
   2   2  -5  165.66    8.17
   2   2  -5  172.06    8.21
  -2  -2   4  479.42   24.24
   2   2  -4  463.04   23.60
   2   2  -4  546.37   23.89
   2   2  -4  492.68   23.83
   2   2  -4  541.01   23.90
   2   2  -4  482.85   23.68
   2   2  -3 1101.77   50.51
  -2  -2   3 1040.65   49.55
   2   2  -3 1046.21   49.04
  -2  -2   3  966.18   49.33
   2   2  -3 1066.47   49.06
  -2  -2   2 1323.63   64.00
   2   2  -2 1393.85   64.09
   2   2  -2 1330.98   64.97
   2   2  -1  429.00   21.66
  -2  -2   1  449.85   21.16
  -2  -2   1  415.90   20.90
  -2  -2   0    6.45    1.32
  -2  -2   0    4.00    0.94
   2   2   0    5.49    1.02
   2   2   1    4.86    1.43
  -2  -2  -1    3.94    1.20
   2   2   1    3.02    0.88
   2   2   2  328.08   17.08
   2   2   2  346.09   16.61
  -2  -2  -2  340.40   16.56
   2   2   3  194.90   10.27
  -2  -2  -3  191.33    9.71
   2   2   3  187.71    9.60
  -2  -2  -4   89.80    4.89
  -2  -2  -4   92.18    4.74
   2   2   4   93.99    5.83
  -2  -2  -4  105.37    5.59
  -2  -2  -4   95.69    4.81
   2   2   4   89.01    4.75
  -2  -2  -4   97.54    4.79
  -2  -2  -5   55.44    3.23
  -2  -2  -5   57.92    3.38
   2   2   5   61.22    4.29
  -2  -2  -5   50.89    3.16
  -2  -2  -5   62.54    3.91
  -2  -2  -5   51.34    2.97
  -2  -2  -5   50.82    3.42
  -2  -2  -5   56.14    3.25
  -2  -2  -5   57.26    3.22
  -2  -2  -6   17.67    1.55
  -2  -2  -6   16.34    1.52
  -2  -2  -6   17.47    1.83
  -2  -2  -6   13.47    1.21
  -2  -2  -6   17.84    1.58
  -2  -2  -6   19.58    1.66
  -2  -2  -7   10.34    1.42
  -2  -2  -7   11.95    1.39
  -2  -2  -7   10.18    1.74
  -2  -2  -7   11.42    1.56
  -2  -2  -7   11.13    1.81
  -2  -2  -8    7.18    1.24
  -2  -2  -8    5.79    1.68
  -2  -2  -8    5.91    1.67
  -2  -2  -8    5.53    1.41
  -2  -2  -8    8.10    1.46
  -2  -2  -9    1.04    1.37
  -2  -2  -9    0.53    0.83
  -2  -2  -9    0.30    1.18
  -2  -2 -10   16.57    1.34
  -2  -2 -10    9.10    1.67
  -2  -2 -11    0.21    0.54
   2   3  -9    0.51    0.62
   2   3  -9    0.22    0.61
   2   3  -8   13.78    1.36
   2   3  -8   11.18    1.39
   2   3  -8   13.28    1.55
   2   3  -8   12.43    1.52
   2   3  -8   13.64    1.52
   2   3  -7  157.62    8.40
   2   3  -7  153.17    8.29
   2   3  -7  155.91    8.15
   2   3  -7  167.64    8.41
   2   3  -7  146.11    8.16
   2   3  -7  146.69    7.84
   2   3  -6  171.96    8.88
   2   3  -6  183.13    9.21
   2   3  -6  188.84    9.10
   2   3  -6  155.74    8.50
   2   3  -6  177.18    9.08
   2   3  -6  175.52    8.68
   2   3  -6  185.20    8.98
   2   3  -6  146.99    8.48
   2   3  -5   43.82    2.77
   2   3  -5   49.83    3.19
   2   3  -5   46.11    3.03
   2   3  -5   47.68    3.20
   2   3  -5   42.67    2.71
   2   3  -5   50.59    3.28
   2   3  -5   47.18    3.10
   2   3  -5   49.54    2.94
   2   3  -4  135.93    6.90
   2   3  -4  139.13    7.21
   2   3  -4  123.70    6.78
   2   3  -4  147.52    7.32
   2   3  -4  138.26    7.10
   2   3  -4  144.90    7.21
   2   3  -4  140.28    7.07
   2   3  -3  570.06   28.20
  -2  -3   3  600.83   29.02
   2   3  -3  576.08   29.47
   2   3  -3  635.62   28.32
   2   3  -3  573.20   28.07
   2   3  -3  602.88   28.22
   2   3  -2  768.03   37.02
   2   3  -2  740.67   35.55
   2   3  -2  760.20   35.54
   2   3  -2  708.85   35.57
  -2  -3   2  741.83   36.26
   2   3  -2  769.62   35.58
  -2  -3   2  744.98   36.06
   2   3  -2  753.65   35.65
   2   3  -2  772.78   35.56
  -2  -3   1   37.04    2.89
  -2  -3   1   40.93    3.03
  -2  -3   0    3.05    1.17
   2   3   0    3.39    1.42
  -2  -3   0    3.33    0.89
   2   3   0    2.76    0.99
   2   3   1  107.52    6.34
   2   3   1  101.20    5.85
   2   3   2  174.58    9.15
  -2  -3  -2  158.59    8.37
   2   3   2  153.74    8.44
  -2  -3  -3  283.00   14.06
  -2  -3  -3  263.82   13.83
  -2  -3  -3  312.73   14.36
   2   3   3  288.63   15.10
   2   3   3  315.58   14.44
  -2  -3  -3  309.28   15.00
  -2  -3  -4   86.09    5.86
   2   3   4   84.61    6.11
  -2  -3  -4   78.07    4.94
  -2  -3  -4   83.13    4.98
  -2  -3  -4   79.95    4.90
  -2  -3  -4   98.69    5.29
  -2  -3  -5  409.30   18.55
  -2  -3  -5  385.80   18.24
   2   3   5  406.01   19.84
  -2  -3  -5  368.59   18.07
  -2  -3  -5  394.84   18.24
  -2  -3  -5  396.16   18.26
   2   3   5  333.09   18.07
  -2  -3  -5  360.68   18.22
  -2  -3  -5  423.55   19.53
  -2  -3  -5  361.35   18.57
  -2  -3  -6    0.18    0.77
  -2  -3  -6    0.59    0.73
  -2  -3  -6    0.09    0.56
  -2  -3  -6    0.90    0.76
  -2  -3  -6    0.69    0.58
  -2  -3  -6    1.35    1.09
  -2  -3  -7    9.14    1.41
  -2  -3  -7    7.00    1.05
  -2  -3  -7    8.82    1.49
  -2  -3  -7   10.27    1.39
  -2  -3  -8    4.42    1.34
  -2  -3  -8    6.75    1.59
  -2  -3  -8    5.05    1.45
  -2  -3  -9   10.04    1.65
  -2  -3  -9    8.82    1.39
  -2  -3  -9   12.62    1.60
   2   3  10   10.20    1.49
  -2  -3 -10   14.65    1.39
  -2  -3 -10   13.79    1.67
  -2  -3 -11   -0.68    0.65
   2   4  -8   12.02    1.45
   2   4  -8   13.24    1.47
   2   4  -8   14.39    1.48
   2   4  -8   14.44    1.37
   2   4  -7    4.64    0.86
   2   4  -7    4.62    1.22
   2   4  -7    5.57    1.17
   2   4  -7    2.86    1.07
   2   4  -7    4.68    1.19
   2   4  -7    3.64    0.90
   2   4  -6  121.49    6.39
   2   4  -6  103.19    5.88
   2   4  -6  115.79    6.45
   2   4  -6  101.47    6.12
   2   4  -6  114.46    6.44
   2   4  -6  115.86    6.49
   2   4  -6  116.60    6.12
   2   4  -5  276.98   13.30
   2   4  -5  256.56   13.36
   2   4  -5  253.37   12.87
   2   4  -5  280.00   13.39
   2   4  -5  264.21   13.34
   2   4  -5  235.27   13.04
   2   4  -5  270.33   13.09
   2   4  -4   30.49    2.41
   2   4  -4   31.34    2.46
   2   4  -4   27.24    1.91
   2   4  -4   28.98    2.07
   2   4  -4   35.83    2.34
   2   4  -4   27.65    2.18
   2   4  -3   66.73    4.07
  -2  -4   3   77.90    5.12
   2   4  -3   69.74    3.92
   2   4  -3   76.65    4.37
   2   4  -3   71.44    4.08
   2   4  -3   80.56    4.32
   2   4  -3   80.30    4.27
   2   4  -3   70.50    4.16
   2   4  -3   77.18    4.32
   2   4  -3   77.26    4.38
   2   4  -2   19.57    1.62
   2   4  -2   23.46    2.78
   2   4  -2   17.78    1.56
  -2  -4   2   21.54    2.20
   2   4  -2   19.76    1.58
   2   4  -2   18.81    1.51
   2   4  -2   22.33    1.71
  -2  -4   2   20.17    1.95
   2   4  -2   19.66    1.42
   2   4  -1   71.01    4.04
   2   4  -1   78.64    5.25
   2   4  -1   72.53    3.89
   2   4  -1   70.15    3.87
  -2  -4   1   70.89    4.68
   2   4  -1   68.20    4.04
   2   4  -1   64.11    3.86
  -2  -4   1   73.29    4.66
   2   4  -1   71.16    3.92
   2   4  -1   71.11    3.92
   2   4   0  276.97   13.27
   2   4   0  233.06   11.70
   2   4   0  245.50   11.88
   2   4   0  219.13   11.58
   2   4   0  249.99   11.91
  -2  -4   0  234.51   11.73
   2   4   0  238.84   11.67
  -2  -4   0  244.24   12.51
  -2  -4   0  272.84   12.82
  -2  -4  -1   10.40    1.85
   2   4   1   11.97    1.24
   2   4   1   11.58    1.25
   2   4   1   10.85    2.06
  -2  -4  -1    9.44    1.15
   2   4   1    9.33    1.01
   2   4   1   10.13    1.11
  -2  -4  -2   75.94    4.47
  -2  -4  -2   67.11    3.99
   2   4   2   66.79    3.87
  -2  -4  -2   65.28    3.93
   2   4   2   81.56    5.28
   2   4   2   69.40    3.81
   2   4   2   70.73    3.88
  -2  -4  -2   81.71    5.04
  -2  -4  -3   72.63    3.84
   2   4   3   71.73    5.27
  -2  -4  -3   76.35    4.00
  -2  -4  -3   67.36    4.39
   2   4   3   68.57    3.85
  -2  -4  -4 3283.70  158.27
  -2  -4  -4 3323.00  157.95
  -2  -4  -4 3345.15  157.84
   2   4   4 3328.31  157.97
   2   4   4 3509.27  159.78
  -2  -4  -4 3438.45  158.14
  -2  -4  -4 3641.09  158.53
  -2  -4  -4 3385.51  157.98
   2   4   4 3325.82  157.90
  -2  -4  -4 3390.91  157.91
  -2  -4  -5  197.17    9.89
  -2  -4  -5  196.87    9.97
  -2  -4  -5  197.72    9.88
   2   4   5  196.17   11.72
  -2  -4  -5  209.79   10.13
  -2  -4  -5  196.26    9.96
  -2  -4  -5  192.97   10.06
  -2  -4  -6    1.34    0.78
  -2  -4  -6    0.47    0.83
  -2  -4  -6    1.59    0.83
  -2  -4  -6    0.59    0.84
  -2  -4  -6    1.57    0.73
  -2  -4  -6    0.80    0.75
  -2  -4  -7    1.85    1.05
  -2  -4  -7    0.64    0.96
  -2  -4  -7    0.60    0.73
  -2  -4  -7    0.42    0.84
  -2  -4  -8    3.23    1.29
  -2  -4  -8    2.29    0.87
  -2  -4  -8    3.97    1.22
   2   4   9    6.81    1.68
  -2  -4  -9    5.83    1.43
  -2  -4  -9    6.86    1.61
  -2  -4  -9    6.24    1.43
   2   4  10    3.85    1.09
  -2  -4 -10    6.71    1.07
  -2  -4 -10    6.72    1.13
  -2  -4 -11    2.40    0.69
  -2  -4 -11    1.94    0.56
   2   5  -8   27.45    2.06
   2   5  -8   30.43    2.01
   2   5  -7    7.78    1.03
   2   5  -7    6.66    1.26
   2   5  -7    7.08    1.20
   2   5  -7    6.64    1.25
   2   5  -7    7.88    1.41
   2   5  -6   46.11    3.17
   2   5  -6   39.51    3.17
   2   5  -6   44.48    3.30
   2   5  -6   39.25    2.69
   2   5  -6   50.39    3.40
   2   5  -6   46.32    2.97
   2   5  -5  243.46   11.82
   2   5  -5  237.51   12.35
   2   5  -5  239.88   12.30
   2   5  -5  264.24   12.11
   2   5  -4  119.54    6.43
   2   5  -4  111.50    5.99
   2   5  -4  117.97    6.39
   2   5  -4   92.40    5.91
   2   5  -4  119.19    6.45
   2   5  -4  119.77    6.22
   2   5  -4  115.70    6.27
   2   5  -4  102.66    5.73
   2   5  -3  244.32   11.77
   2   5  -3  199.73   11.41
   2   5  -3  223.20   11.54
   2   5  -3  234.60   11.83
   2   5  -3  236.82   11.81
   2   5  -3  243.08   11.70
   2   5  -3  230.65   11.46
   2   5  -3  247.06   11.66
   2   5  -3  218.05   11.26
   2   5  -2   25.24    3.14
   2   5  -2   31.90    2.19
   2   5  -2   31.89    2.32
   2   5  -2   29.37    2.30
   2   5  -2   32.07    2.27
   2   5  -2   29.53    2.03
   2   5  -1   14.75    1.51
   2   5  -1   16.03    1.55
   2   5  -1   15.72    1.43
   2   5  -1   15.84    1.49
   2   5  -1   16.16    1.36
   2   5  -1   17.49    2.55
  -2  -5   1   14.34    1.32
  -2  -5   1   14.30    1.98
   2   5  -1   14.80    1.50
  -2  -5   0   65.30    4.88
   2   5   0   70.35    4.10
   2   5   0   73.17    4.38
   2   5   0   77.74    4.44
   2   5   0   71.20    4.08
   2   5   0   71.16    4.05
   2   5   0   76.16    5.57
  -2  -5   0   76.50    4.13
   2   5   0   71.77    4.13
   2   5   0   70.55    3.99
   2   5   1   47.14    2.90
   2   5   1   44.80    2.69
  -2  -5  -1   44.41    3.58
   2   5   1   45.29    4.13
   2   5   1   49.57    3.04
  -2  -5  -1   47.28    2.97
   2   5   1   49.73    2.86
   2   5   1   47.76    2.91
  -2  -5  -2   40.80    2.83
  -2  -5  -2   45.53    3.35
   2   5   2   38.46    2.57
   2   5   2   41.43    2.74
   2   5   2   43.27    2.72
  -2  -5  -3  281.53   13.91
   2   5   3  286.30   14.23
  -2  -5  -3  306.54   14.23
  -2  -5  -3  264.90   14.80
  -2  -5  -3  308.15   14.35
   2   5   3  305.39   16.06
   2   5   3  289.73   14.24
   2   5   3  270.69   13.98
  -2  -5  -4  137.82    6.62
  -2  -5  -4  135.58    6.76
  -2  -5  -4  121.65    7.23
  -2  -5  -4  119.93    6.50
   2   5   4  131.05    6.80
   2   5   4  116.70    6.47
   2   5   5    9.78    1.49
  -2  -5  -5   11.27    1.25
  -2  -5  -5   10.26    1.06
  -2  -5  -5   10.46    1.17
  -2  -5  -5    9.89    1.24
  -2  -5  -5    9.21    1.32
  -2  -5  -5   11.24    1.42
  -2  -5  -6   69.29    3.91
  -2  -5  -6   65.09    3.71
  -2  -5  -6   58.40    3.75
  -2  -5  -6   67.84    4.07
  -2  -5  -6   55.16    3.75
  -2  -5  -6   63.21    3.98
   2   5   6   63.00    4.16
  -2  -5  -7   43.26    2.82
  -2  -5  -7   39.50    2.95
  -2  -5  -7   34.48    2.70
  -2  -5  -7   45.02    3.03
  -2  -5  -7   39.94    2.91
   2   5   7   36.81    3.17
  -2  -5  -7   46.44    3.19
  -2  -5  -8   13.01    1.42
  -2  -5  -8   15.37    1.59
  -2  -5  -8   13.58    1.74
  -2  -5  -8   16.84    1.80
   2   5   8   12.79    1.93
   2   5   9    6.23    1.41
  -2  -5 -10    5.53    1.05
  -2  -5 -10    6.76    1.03
   2   5  10    4.12    1.10
   2   6  -7   16.36    1.63
   2   6  -7   17.08    1.58
   2   6  -7   14.69    1.29
   2   6  -6    0.04    0.78
   2   6  -6    1.13    0.95
   2   6  -6    0.52    0.57
   2   6  -6    0.36    0.94
   2   6  -6   -0.23    1.08
   2   6  -6    0.88    0.95
   2   6  -5   11.76    1.46
   2   6  -5   10.96    1.24
   2   6  -5    9.60    1.65
   2   6  -4 1071.31   46.58
   2   6  -4  970.02   46.82
   2   6  -4 1015.96   46.74
   2   6  -4 1060.39   46.67
   2   6  -4  957.05   46.76
   2   6  -4  964.62   46.28
   2   6  -4  877.62   45.97
   2   6  -3  113.30    6.39
   2   6  -3  119.36    6.50
   2   6  -3  112.28    6.28
   2   6  -3  120.21    6.83
   2   6  -3  119.91    6.77
   2   6  -3  120.92    6.66
   2   6  -3  104.34    6.04
   2   6  -2   35.63    2.95
   2   6  -2   35.52    2.57
   2   6  -2   35.10    2.74
   2   6  -2   34.13    2.68
   2   6  -2   39.53    2.72
   2   6  -2   35.69    2.73
   2   6  -2   33.34    2.38
   2   6  -1    9.75    1.32
   2   6  -1   10.61    1.36
   2   6  -1   10.97    1.50
   2   6  -1    8.85    1.14
   2   6  -1    9.20    1.46
   2   6  -1    9.93    1.28
   2   6   0    3.40    0.88
   2   6   0    3.63    1.03
  -2  -6   0    3.85    0.91
   2   6   0    3.10    0.98
   2   6   0    3.45    0.84
   2   6   0    3.81    1.79
   2   6   0    3.76    0.98
   2   6   1  259.49   13.33
   2   6   1  286.76   13.63
   2   6   1  279.86   13.82
  -2  -6  -1  282.24   13.84
  -2  -6  -1  277.66   13.62
   2   6   1  266.53   13.55
   2   6   1  264.56   13.56
   2   6   2    3.18    0.97
   2   6   2    3.47    1.04
  -2  -6  -2    1.37    0.90
   2   6   2    2.03    0.75
   2   6   3   -0.19    0.86
  -2  -6  -3    0.41    0.97
   2   6   3    0.10    0.80
  -2  -6  -3    0.51    0.53
  -2  -6  -3   -0.46    1.01
   2   6   3    0.43    0.63
  -2  -6  -4    1.72    0.68
   2   6   4    2.01    0.89
  -2  -6  -4    1.19    0.96
   2   6   4    1.15    0.60
  -2  -6  -5   54.15    3.31
  -2  -6  -5   51.27    3.43
   2   6   5   49.48    3.43
   2   6   5   50.38    3.60
  -2  -6  -5   53.09    3.68
  -2  -6  -5   54.30    3.43
  -2  -6  -6   72.72    4.41
  -2  -6  -6   75.63    4.18
  -2  -6  -6   78.56    4.69
  -2  -6  -6   67.92    4.41
  -2  -6  -6   79.60    4.71
   2   6   6   76.35    4.82
  -2  -6  -7   21.30    1.93
  -2  -6  -7   19.30    1.62
  -2  -6  -7   16.78    2.00
  -2  -6  -7   14.74    1.71
  -2  -6  -7   16.32    1.86
   2   6   7   18.32    2.14
  -2  -6  -8    0.88    0.86
  -2  -6  -8    1.00    0.86
  -2  -6  -8    0.63    1.04
   2   6   8   -0.53    1.31
  -2  -6  -9   22.57    1.82
   2   6   9   18.73    1.92
  -2  -6  -9   19.16    1.55
   2   6  10    0.84    0.78
  -2  -6 -10    2.03    0.81
  -2  -6 -10    1.21    0.59
   2   7  -6   11.23    1.38
  -2  -7   6    8.41    1.16
   2   7  -6   11.98    1.18
   2   7  -6   10.19    1.46
   2   7  -5    1.31    0.84
   2   7  -5    1.19    0.63
   2   7  -5    1.81    1.05
   2   7  -4    3.62    0.93
   2   7  -4    4.66    1.53
   2   7  -4    3.50    1.27
   2   7  -3    4.26    2.04
   2   7  -3   10.39    2.00
   2   7  -3    7.55    1.76
   2   7  -3    6.02    1.60
   2   7  -3    7.80    1.42
   2   7  -3   12.93    2.20
   2   7  -3    9.35    2.30
   2   7  -3    9.08    2.41
   2   7  -2    3.30    1.29
   2   7  -2    1.70    1.14
   2   7  -2    3.29    0.98
   2   7  -2    1.82    1.18
   2   7  -2    1.00    1.13
   2   7  -2    3.08    1.51
   2   7  -1   17.97    2.14
   2   7  -1   17.45    1.82
   2   7  -1   15.97    1.90
   2   7  -1   15.46    1.69
   2   7  -1   14.71    2.03
   2   7  -1   18.89    2.03
  -2  -7   1   15.22    2.22
   2   7   0    2.46    0.99
   2   7   0    0.57    1.12
   2   7   0    1.44    0.87
   2   7   0    1.49    0.84
   2   7   0    1.73    1.11
  -2  -7   0    2.62    0.91
  -2  -7   0   -0.06    1.38
   2   7   1    1.10    0.93
  -2  -7  -1    1.26    0.98
   2   7   1    0.04    0.65
   2   7   1    0.72    0.84
  -2  -7  -1    0.60    1.25
   2   7   1   -0.38    0.96
   2   7   1    1.28    1.14
   2   7   2    6.92    1.34
   2   7   2   10.26    1.60
   2   7   2    6.29    1.15
  -2  -7  -2    7.81    1.44
   2   7   2    7.79    1.41
  -2  -7  -3   19.48    1.71
  -2  -7  -3   28.14    2.39
   2   7   3   28.73    2.41
   2   7   3   23.37    1.91
   2   7   3   25.27    2.29
   2   7   4    2.68    1.07
  -2  -7  -4    3.35    1.29
  -2  -7  -4    1.40    0.65
  -2  -7  -4    2.16    1.20
  -2  -7  -4    2.66    0.95
   2   7   5    8.77    1.62
  -2  -7  -5    9.24    1.22
   2   7   5    8.77    1.39
  -2  -7  -5    7.92    1.32
  -2  -7  -5    8.21    1.43
   2   7   6   10.10    1.77
  -2  -7  -6    9.91    1.34
  -2  -7  -6    9.83    1.52
  -2  -7  -6    7.39    1.42
  -2  -7  -6   11.98    1.74
  -2  -7  -7   54.52    3.36
  -2  -7  -7   55.38    3.61
   2   7   7   52.86    3.72
  -2  -7  -7   54.05    3.56
   2   7   8    3.34    1.24
  -2  -7  -8    4.41    1.08
  -2  -7  -8    2.29    0.98
   2   7   9   12.52    1.49
  -2  -7  -9   15.23    1.39
   2   7  10    0.34    0.61
  -2  -7 -10    0.90    0.58
   2   8  -5    0.17    0.61
   2   8  -5    0.56    0.44
   2   8  -5    0.21    0.76
  -2  -8   5   -0.30    0.65
   2   8  -4   10.23    1.19
   2   8  -4   14.47    1.58
  -2  -8   4    9.76    1.43
   2   8  -4   10.17    1.67
   2   8  -3    0.76    0.62
   2   8  -3    1.04    0.86
   2   8  -3    0.25    0.95
   2   8  -3    1.37    0.86
  -2  -8   3    1.12    1.23
   2   8  -3    1.32    1.10
   2   8  -3    0.99    1.34
   2   8  -2   89.26    5.32
   2   8  -2   94.59    5.60
  -2  -8   2   92.66    5.62
   2   8  -2   96.04    5.43
   2   8  -2   89.64    5.73
   2   8  -2   92.60    5.44
   2   8  -2   78.41    4.97
   2   8  -1    0.41    0.81
   2   8  -1    0.84    1.06
   2   8  -1    1.32    1.28
   2   8  -1    1.05    1.10
   2   8  -1   -0.47    0.96
  -2  -8   1    0.40    1.44
   2   8  -1   -0.48    1.27
   2   8   0   72.82    4.18
   2   8   0   63.53    4.27
  -2  -8   0   67.74    4.07
  -2  -8   0   71.46    4.61
   2   8   0   66.39    4.24
   2   8   0   60.76    4.08
   2   8   1    1.28    0.99
   2   8   1    1.91    1.34
   2   8   1    0.72    0.92
  -2  -8  -1    1.38    0.98
   2   8   2    6.77    1.21
   2   8   2    7.89    1.57
   2   8   2    8.81    1.69
   2   8   2    7.23    1.43
  -2  -8  -2    9.96    1.80
  -2  -8  -2    7.48    1.44
   2   8   3   -0.04    0.73
   2   8   3    0.48    1.09
   2   8   3   -1.43    1.41
  -2  -8  -3   -0.22    0.65
  -2  -8  -3   -0.41    0.76
  -2  -8  -3   -0.25    1.23
   2   8   4    0.66    1.25
   2   8   4   -0.61    1.23
  -2  -8  -4    0.20    0.88
  -2  -8  -4   -1.05    1.43
   2   8   5   20.68    2.06
  -2  -8  -5   17.50    1.82
  -2  -8  -5   17.66    1.99
  -2  -8  -5   22.86    2.32
  -2  -8  -6    6.57    1.36
  -2  -8  -6    7.47    1.33
  -2  -8  -6    7.42    1.06
   2   8   6    7.32    1.60
   2   8   7    4.18    1.31
  -2  -8  -7    5.45    0.99
  -2  -8  -7    4.70    1.13
  -2  -8  -7    7.37    1.35
  -2  -8  -8   99.26    5.21
  -2  -8  -8   98.35    5.36
   2   8   8   85.14    5.40
  -2  -8  -9   27.31    1.84
   2   8   9   23.98    1.97
   2   9  -4    0.32    0.56
   2   9  -4    0.40    0.69
   2   9  -3   -0.26    1.03
   2   9  -3    1.76    0.75
   2   9  -3    0.92    0.67
  -2  -9   3    0.80    0.80
   2   9  -3    1.31    0.84
   2   9  -2    1.01    0.81
   2   9  -2    0.24    0.54
   2   9  -2   -0.62    0.90
   2   9  -2    0.15    0.84
   2   9  -2    0.06    1.14
   2   9  -2    0.21    0.75
   2   9  -1   56.37    3.76
   2   9  -1   63.74    3.81
  -2  -9   1   59.88    3.93
   2   9  -1   69.08    4.20
   2   9  -1   64.20    3.80
   2   9  -1   49.22    3.48
  -2  -9   0   18.42    2.08
   2   9   0   20.59    2.22
   2   9   0   19.82    1.77
   2   9   0   19.54    1.85
   2   9   0   13.56    1.66
   2   9   1    0.10    0.93
   2   9   1   -0.44    1.46
  -2  -9  -1   -0.24    0.85
  -2  -9  -1   -0.84    1.37
   2   9   1    0.57    0.87
   2   9   2   -0.59    1.01
  -2  -9  -2    0.34    0.73
   2   9   2    1.34    1.19
  -2  -9  -2    1.37    1.00
   2   9   2    0.26    0.75
   2   9   2    0.52    1.34
   2   9   3    2.89    1.19
   2   9   3    3.37    1.53
   2   9   3    3.91    1.34
  -2  -9  -3    2.04    1.39
  -2  -9  -3    3.92    1.32
   2   9   4    4.16    1.28
  -2  -9  -4    4.69    0.90
   2   9   4    3.55    1.31
   2   9   4    6.27    1.41
  -2  -9  -4    6.34    1.43
  -2  -9  -5    2.54    0.77
  -2  -9  -5    1.39    1.12
   2   9   5    1.19    1.04
  -2  -9  -5    2.06    1.14
  -2  -9  -6   18.01    1.83
   2   9   6   19.32    2.02
  -2  -9  -7   16.87    1.67
  -2  -9  -7   21.31    1.90
   2   9   7   18.30    1.84
  -2  -9  -8   26.67    1.75
   2   9   8   19.85    1.69
   2  10  -2    4.44    0.74
   2  10  -2    4.20    0.74
   2  10  -2    4.58    0.81
   2  10  -1    6.99    0.94
   2  10  -1    4.45    0.74
   2  10  -1    5.79    1.00
   2  10   0    1.33    0.69
   2  10   0    0.41    0.60
   2  10   0    0.66    0.94
   2  10   0    0.86    0.85
  -2 -10   0    0.40    0.71
  -2 -10  -1    8.58    1.11
  -2 -10  -1   13.73    1.55
   2  10   1   12.10    1.19
   2  10   1   10.02    1.26
   2  10   2    1.13    0.84
  -2 -10  -2   -0.43    1.06
  -2 -10  -2    2.26    0.85
   2  10   2    0.88    0.94
   2  10   3    0.09    0.78
  -2 -10  -3    1.36    1.00
  -2 -10  -3    0.60    0.83
   2  10   3    0.75    0.90
   2  10   3   -0.78    1.15
   2  10   4    2.84    0.97
   2  10   4    3.87    1.15
   2  10   4    2.61    0.98
  -2 -10  -4    4.69    1.12
   2  10   5   30.97    2.28
  -2 -10  -5   32.59    2.36
  -2 -10  -6    6.94    1.07
   2  10   6    5.90    1.01
   2  10   7    0.52    0.52
   2  10   7    0.40    0.63
  -2 -10  -7    0.81    0.55
  -2 -10  -7    0.88    0.65
  -2 -11  -1    8.74    0.98
   2  11   2    4.92    0.77
   2  11   2    6.06    0.94
   2  11   3    3.63    0.73
   2  11   3    4.65    0.84
  -2 -11  -3    4.64    0.85
   2  11   4    6.28    0.87
   2  11   4    8.91    1.09
   2  11   4    7.05    0.92
  -2 -11  -4    6.90    0.97
  -3  10   3    0.04    0.45
  -3  10   2    1.25    0.53
   3 -10  -2    0.60    0.49
  -3  10   1    5.57    0.75
   3 -10  -1    4.08    0.70
  -3   9   6    1.88    0.52
   3  -9  -6    3.03    0.72
  -3   9   5    1.29    0.60
   3  -9  -5    2.41    0.62
   3  -9  -5    0.88    0.70
   3  -9  -5    0.89    0.55
   3  -9  -5    2.42    0.87
  -3   9   4   -0.03    0.78
   3  -9  -4    0.98    0.84
  -3   9   4    1.26    1.15
   3  -9  -4    1.59    0.85
   3  -9  -4    0.92    1.02
   3  -9  -3   11.76    1.23
   3  -9  -3   11.75    1.32
   3  -9  -3   15.42    1.52
  -3   9   3   14.24    1.88
  -3   9   3   14.29    1.40
  -3   9   2    0.94    0.73
   3  -9  -2    0.49    0.75
  -3   9   2    0.07    1.18
   3  -9  -2    0.11    0.68
  -3   9   1    6.69    1.08
  -3   9   1    7.89    1.59
  -3   9   1    5.90    0.89
  -3   9   0   12.51    1.18
   3  -9   0   10.90    1.32
   3  -9   0    8.69    1.05
  -3   9   0    9.98    1.26
  -3   9  -1    3.77    0.77
  -3   9  -1    4.34    0.90
  -3   9  -1    4.89    1.14
   3  -9   1    2.73    0.75
   3  -9   1    3.67    0.87
   3  -9   2    6.54    0.94
   3  -9   2    6.85    0.96
   3  -9   2    7.22    0.92
  -3   9  -2    8.78    1.02
  -3   8   8    3.43    0.65
   3  -8  -8    4.84    0.79
  -3   8   7    7.23    1.02
   3  -8  -7    6.05    1.04
   3  -8  -7    7.45    1.13
   3  -8  -6    0.13    0.84
  -3   8   6    0.08    0.73
   3  -8  -6    0.12    0.58
  -3   8   5    3.03    0.98
  -3   8   5    3.63    0.89
   3  -8  -5    3.35    0.94
  -3   8   5    4.16    1.03
   3  -8  -5    4.61    1.11
   3  -8  -5    5.87    1.40
   3  -8  -4   37.14    2.62
  -3   8   4   32.65    2.58
   3  -8  -4   42.56    2.98
  -3   8   4   38.57    3.14
   3  -8  -4   35.18    2.56
  -3   8   4   33.71    2.51
  -3   8   3  190.65    9.73
   3  -8  -3  167.42    8.80
   3  -8  -3  192.46    9.22
   3  -8  -3  166.84    8.86
  -3   8   3  150.39    8.79
  -3   8   3  171.36    8.92
   3  -8  -2    1.31    0.66
  -3   8   2    1.50    0.72
  -3   8   2    1.92    1.40
  -3   8   2    1.66    1.02
   3  -8  -2    3.07    0.86
   3  -8  -2    2.25    1.09
   3  -8  -2    1.40    0.97
  -3   8   1    8.67    1.33
   3  -8  -1    6.61    1.08
  -3   8   1    7.88    1.76
   3  -8  -1    8.68    1.23
  -3   8   1    7.01    1.11
  -3   8   0    0.40    0.97
  -3   8   0    0.26    0.79
   3  -8   0    0.74    1.04
  -3   8  -1   81.51    4.91
  -3   8  -1   84.34    5.40
  -3   8  -1   84.10    4.79
  -3   8  -1   83.77    4.62
  -3   8  -2  100.65    5.32
  -3   8  -2   89.87    5.68
  -3   8  -2   92.27    5.18
  -3   8  -2   96.00    5.37
  -3   8  -3    0.79    0.70
  -3   8  -3   -0.31    0.76
  -3   8  -3   -0.11    0.75
   3  -8   3   -0.89    0.79
  -3   8  -4    0.32    0.65
  -3   8  -4    0.80    0.62
   3  -8   4   -0.31    0.57
   3  -7  -8   16.85    1.54
   3  -7  -8   16.61    1.62
   3  -7  -8   18.26    1.56
   3  -7  -7   28.64    2.23
   3  -7  -7   29.18    2.35
   3  -7  -7   27.53    2.30
   3  -7  -6    0.32    0.78
  -3   7   6   -0.61    0.70
  -3   7   5    0.90    0.75
  -3   7   5    1.63    1.06
  -3   7   5    1.97    1.13
   3  -7  -5    1.15    0.86
   3  -7  -5    1.46    1.05
   3  -7  -5    0.81    1.17
   3  -7  -5    1.51    0.83
  -3   7   4    0.06    0.98
  -3   7   4    0.56    0.82
   3  -7  -4    0.65    0.93
   3  -7  -4    0.24    0.67
  -3   7   4    0.93    1.23
   3  -7  -4    0.59    0.93
   3  -7  -4   -0.06    1.13
   3  -7  -3   25.03    2.04
   3  -7  -3   20.32    2.06
   3  -7  -3   22.86    2.25
  -3   7   3   22.57    2.01
  -3   7   3   18.67    2.03
  -3   7   3   27.51    2.61
  -3   7   2  484.80   21.05
  -3   7   2  410.54   20.24
   3  -7  -2  377.87   19.95
  -3   7   2  391.88   19.94
   3  -7  -2  390.15   19.95
   3  -7  -2  461.12   20.47
  -3   7   2  430.14   20.25
  -3   7   1   70.78    4.21
   3  -7  -1   62.35    4.03
  -3   7   1   87.27    5.15
   3  -7  -1   75.70    4.44
  -3   7   1   75.48    4.46
   3  -7   0   43.50    3.07
  -3   7   0   48.62    3.17
  -3   7   0   51.72    3.34
   3  -7   1   21.65    2.33
  -3   7  -1   28.84    2.24
  -3   7  -1   28.13    2.10
  -3   7  -1   25.95    2.30
  -3   7  -1   29.99    2.81
  -3   7  -2    5.93    1.21
   3  -7   2    6.30    1.52
  -3   7  -2   10.66    1.70
  -3   7  -2    4.60    1.64
  -3   7  -2    7.60    1.44
  -3   7  -3  117.56    6.11
  -3   7  -3  100.26    6.27
   3  -7   3   91.81    5.92
  -3   7  -3  113.84    6.10
  -3   7  -3  121.82    6.19
  -3   7  -4   37.21    2.70
  -3   7  -4   38.64    2.70
  -3   7  -5    6.11    1.08
  -3   7  -5    5.77    0.99
   3  -7   5    2.92    0.72
  -3   7  -6   13.84    1.21
   3  -7   6    9.46    1.00
  -3   7  -6   12.91    1.11
  -3   7  -6   10.38    1.22
   3  -6  -9    0.54    0.73
   3  -6  -9    0.54    0.75
   3  -6  -8    2.41    0.97
   3  -6  -8    1.74    0.99
   3  -6  -8    1.86    0.82
   3  -6  -7    0.48    0.69
   3  -6  -7   -0.15    0.92
   3  -6  -7    0.33    0.65
   3  -6  -7   -0.94    0.96
   3  -6  -7    0.37    1.05
   3  -6  -6   16.35    1.74
   3  -6  -6   14.02    1.54
   3  -6  -6   14.96    1.89
   3  -6  -5   69.51    4.06
  -3   6   5   60.46    4.18
   3  -6  -5   55.83    3.85
   3  -6  -5   72.73    4.12
  -3   6   5   56.32    3.72
   3  -6  -4   43.89    2.97
   3  -6  -4   40.89    2.97
  -3   6   4   38.02    2.84
   3  -6  -4   43.29    2.98
  -3   6   4   48.89    3.49
   3  -6  -4   51.37    3.40
   3  -6  -3    0.39    0.68
   3  -6  -3    0.06    0.54
  -3   6   3    0.27    1.17
  -3   6   3    0.45    0.79
   3  -6  -3   -0.36    0.90
   3  -6  -3   -0.28    0.99
   3  -6  -3    0.35    0.82
  -3   6   3   -0.80    0.95
  -3   6   2  133.36    6.97
  -3   6   2  113.41    6.32
   3  -6  -2  115.95    6.21
   3  -6  -2  109.66    6.19
   3  -6  -2  126.35    6.57
  -3   6   2  118.77    6.46
  -3   6   2  108.36    6.10
  -3   6   1    5.66    1.01
  -3   6   1    3.99    1.09
  -3   6   1    6.77    1.59
  -3   6   1    5.56    1.20
   3  -6  -1    6.16    1.00
   3  -6  -1    6.28    1.33
   3  -6  -1    6.37    1.24
   3  -6   0  146.87    8.02
  -3   6   0  157.78    7.91
   3  -6   0  141.42    7.85
  -3   6   0  150.68    7.69
  -3   6   0  153.62    8.02
  -3   6  -1    8.38    1.08
  -3   6  -1    6.64    1.54
  -3   6  -1    8.54    1.35
  -3   6  -1    8.50    1.22
   3  -6   1    5.67    1.45
  -3   6  -1    6.40    1.61
  -3   6  -2    0.98    0.87
  -3   6  -2    0.93    0.98
  -3   6  -2   -0.07    1.14
  -3   6  -2    1.69    0.94
  -3   6  -2    0.22    1.31
  -3   6  -3   72.65    4.34
  -3   6  -3   65.62    4.54
  -3   6  -3   68.46    4.35
  -3   6  -3   65.37    4.77
  -3   6  -3   74.70    4.34
  -3   6  -4   67.64    4.18
  -3   6  -4   66.02    4.19
  -3   6  -4   66.51    4.20
  -3   6  -5   56.50    3.37
  -3   6  -5   57.70    3.45
  -3   6  -6    4.52    1.12
  -3   6  -6    4.37    0.98
  -3   6  -6    5.42    1.04
  -3   6  -7   -0.27    0.55
   3  -5 -10    6.96    0.90
   3  -5 -10    7.54    1.00
   3  -5 -10    7.40    0.97
   3  -5  -9   17.17    1.67
   3  -5  -9   15.18    1.54
   3  -5  -8   -0.62    0.91
   3  -5  -8   -0.09    0.77
   3  -5  -8    0.05    1.05
   3  -5  -8   -1.10    1.13
   3  -5  -7    0.73    1.19
   3  -5  -7    0.65    0.86
   3  -5  -7    1.08    0.75
   3  -5  -7    1.04    0.89
   3  -5  -7    0.22    1.07
   3  -5  -6  104.90    5.96
   3  -5  -6  102.68    6.06
   3  -5  -6  107.09    6.20
   3  -5  -6  115.42    6.23
   3  -5  -5  281.34   13.93
   3  -5  -5  292.59   13.84
   3  -5  -5  304.39   14.05
   3  -5  -5  268.43   13.79
   3  -5  -5  268.71   14.09
  -3   5   5  254.51   13.66
   3  -5  -4   94.16    5.32
   3  -5  -4  105.22    5.39
   3  -5  -4   88.10    5.10
   3  -5  -4  103.38    5.61
  -3   5   4  102.53    5.71
   3  -5  -4   93.74    5.27
  -3   5   4   82.81    5.12
   3  -5  -3   17.39    1.54
   3  -5  -3   15.58    1.35
  -3   5   3   17.91    1.88
   3  -5  -3   16.09    1.52
   3  -5  -3   16.86    1.58
   3  -5  -3   17.18    1.76
  -3   5   3   16.73    1.51
   3  -5  -2    2.32    0.74
  -3   5   2    2.87    0.80
   3  -5  -2    1.92    0.70
   3  -5  -2    1.72    0.65
  -3   5   2    2.39    0.89
  -3   5   2    3.47    1.14
  -3   5   2    1.53    0.60
   3  -5  -2    2.44    0.93
  -3   5   1  246.39   13.68
   3  -5  -1  276.50   13.78
  -3   5   1  300.67   13.88
  -3   5   1  268.93   13.68
  -3   5   1  308.32   14.21
  -3   5   1  281.82   13.57
   3  -5  -1  297.84   13.84
   3  -5  -1  261.12   13.50
  -3   5   0   83.93    4.51
  -3   5   0   75.90    4.17
  -3   5   0   77.87    4.30
  -3   5   0   70.95    4.69
   3  -5   0   72.97    4.44
   3  -5   0   75.64    4.37
  -3   5   0   79.90    4.43
  -3   5  -1   44.95    3.27
  -3   5  -1   44.67    3.28
  -3   5  -1   43.70    2.89
  -3   5  -1   43.42    2.76
  -3   5  -1   47.05    3.01
  -3   5  -2   55.24    3.47
  -3   5  -2   54.01    3.78
  -3   5  -2   54.34    3.81
  -3   5  -2   54.73    3.38
  -3   5  -2   55.44    3.52
  -3   5  -3    1.79    0.87
  -3   5  -3    1.57    0.98
  -3   5  -3    0.91    0.98
  -3   5  -3    1.98    0.96
  -3   5  -3    4.48    1.46
  -3   5  -4   93.26    5.50
  -3   5  -4   96.72    5.52
  -3   5  -4   96.61    5.54
  -3   5  -5   67.86    4.77
  -3   5  -5   72.10    4.56
  -3   5  -5   77.41    4.58
  -3   5  -6    7.84    1.37
  -3   5  -6    5.21    1.28
  -3   5  -6    4.46    0.90
  -3   5  -7   13.12    1.46
  -3   5  -8    0.45    0.67
  -3   5  -8    1.19    0.60
  -3   5  -8    1.06    0.62
   3  -4 -10    0.41    0.62
   3  -4 -10   -0.19    0.62
   3  -4 -10    0.47    0.63
   3  -4 -10    0.13    0.66
   3  -4  -9   64.96    4.07
   3  -4  -9   68.71    4.14
   3  -4  -8   58.48    3.45
   3  -4  -8   59.54    3.35
   3  -4  -7   28.98    2.50
   3  -4  -7   29.12    2.41
   3  -4  -7   25.55    2.25
   3  -4  -7   29.81    2.41
   3  -4  -7   23.78    2.06
   3  -4  -6   87.92    4.91
   3  -4  -6   73.83    4.78
   3  -4  -6   80.17    4.72
   3  -4  -6   86.94    4.99
   3  -4  -6   82.68    4.93
   3  -4  -5  118.91    6.28
   3  -4  -5  113.68    6.31
   3  -4  -5  120.55    6.32
   3  -4  -5  117.10    6.44
   3  -4  -5   98.85    5.98
   3  -4  -4  187.28    9.36
  -3   4   4  182.98    9.52
   3  -4  -4  186.47    9.29
   3  -4  -4  194.96    9.38
   3  -4  -4  185.70    9.31
  -3   4   4  165.50    9.12
   3  -4  -3  347.90   16.68
  -3   4   3  369.61   17.03
   3  -4  -3  356.97   16.69
   3  -4  -3  326.03   16.50
   3  -4  -3  342.52   16.60
   3  -4  -3  354.76   16.65
   3  -4  -3  359.75   16.85
  -3   4   3  306.13   16.51
  -3   4   2   40.92    2.48
  -3   4   2   47.20    5.28
   3  -4  -2   39.39    2.49
   3  -4  -2   41.60    2.47
   3  -4  -2   38.07    2.64
  -3   4   2   40.30    2.84
   3  -4  -2   37.93    2.44
   3  -4  -1   43.53    2.83
  -3   4   1   52.70    5.64
  -3   4   1   41.50    3.72
   3  -4  -1   43.93    2.67
  -3   4   1   44.51    2.59
   3  -4  -1   48.09    2.82
  -3   4   1   47.56    3.08
   3  -4  -1   44.56    2.61
  -3   4   1   49.21    2.78
  -3   4   1   43.78    2.73
  -3   4   0   86.58    4.83
  -3   4   0   90.19    5.93
  -3   4   0   98.17    4.85
  -3   4   0   91.78    5.17
  -3   4   0   90.78    4.71
  -3   4   0   85.37    5.08
  -3   4   0   93.98    4.96
   3  -4   0   82.94    4.83
   3  -4   0   83.02    4.79
  -3   4   0   86.80    4.63
  -3   4  -1    0.31    0.51
  -3   4  -1    0.31    0.73
  -3   4  -1    0.68    0.94
  -3   4  -1    0.61    0.86
   3  -4   1    0.87    0.60
  -3   4  -1    0.49    0.61
  -3   4  -2   11.01    1.70
  -3   4  -2   11.70    1.49
  -3   4  -2   13.12    1.64
  -3   4  -2   11.99    1.28
  -3   4  -2   11.74    1.24
  -3   4  -2   14.43    1.42
  -3   4  -3   65.94    4.33
  -3   4  -3   75.25    4.18
  -3   4  -3   69.36    4.10
  -3   4  -3   70.93    4.19
  -3   4  -4    8.13    1.33
  -3   4  -4    8.32    1.34
  -3   4  -4    9.47    1.38
  -3   4  -4    6.21    1.26
  -3   4  -4    7.82    1.56
  -3   4  -5   10.06    1.56
  -3   4  -5    8.93    1.49
  -3   4  -5    9.13    1.47
  -3   4  -5    7.99    1.64
  -3   4  -6    0.39    1.09
  -3   4  -6    0.81    0.83
  -3   4  -6    1.13    1.09
  -3   4  -7   26.99    2.30
  -3   4  -7   28.66    2.44
  -3   4  -7   23.26    1.99
  -3   4  -8   15.96    1.56
  -3   4  -8   14.27    1.62
  -3   4  -8   13.25    1.19
  -3   4  -8   13.39    1.57
   3  -3 -10    2.76    0.89
   3  -3 -10    4.01    0.79
   3  -3 -10    5.18    1.00
   3  -3 -10    3.75    0.92
   3  -3  -9   20.43    1.87
   3  -3  -9   21.34    1.98
   3  -3  -9   18.98    1.95
   3  -3  -8  201.11    9.16
   3  -3  -8  213.62    9.30
   3  -3  -7  280.05   12.61
   3  -3  -7  229.23   12.18
   3  -3  -7  206.58   12.10
   3  -3  -7  285.84   12.64
   3  -3  -6   35.81    2.62
   3  -3  -6   32.74    2.51
   3  -3  -6   38.46    2.70
   3  -3  -6   33.17    2.47
   3  -3  -5   13.73    1.43
   3  -3  -5    9.98    1.29
   3  -3  -5   10.89    1.29
   3  -3  -5   11.03    1.31
   3  -3  -5   12.36    1.35
  -3   3   4  301.68   17.23
   3  -3  -4  324.41   15.78
   3  -3  -4  301.22   15.54
   3  -3  -4  356.31   15.87
   3  -3  -4  341.00   15.79
   3  -3  -4  321.80   15.86
   3  -3  -4  328.57   15.78
   3  -3  -4  299.49   16.42
  -3   3   3  342.74   19.18
   3  -3  -3  375.11   17.81
  -3   3   3  382.42   18.16
   3  -3  -3  353.95   17.87
   3  -3  -3  375.01   17.88
   3  -3  -3  375.72   17.91
   3  -3  -3  374.80   17.93
   3  -3  -2   -0.23    0.54
  -3   3   2    0.53    0.51
   3  -3  -2    0.83    0.56
   3  -3  -2   -0.02    0.52
   3  -3  -2    0.42    0.67
  -3   3   2    0.26    0.76
   3  -3  -2    0.03    0.57
  -3   3   2   -0.62    1.88
   3  -3  -2    0.72    0.66
   3  -3  -2    0.10    1.10
  -3   3   2    0.27    1.16
  -3   3   1  188.36    9.52
  -3   3   1  206.77   12.30
   3  -3  -1  212.05   11.41
  -3   3   1  200.88    9.88
  -3   3   1  213.67   10.82
   3  -3  -1  189.44    9.61
   3  -3  -1  193.83    9.58
   3  -3  -1  191.97    9.67
  -3   3   0  588.42   26.60
  -3   3   0  559.90   28.45
  -3   3   0  567.21   25.76
   3  -3   0  622.32   27.70
  -3   3   0  507.13   25.31
   3  -3   0  522.67   25.46
   3  -3   0  535.79   25.48
  -3   3   0  526.50   25.41
  -3   3  -1  294.77   16.99
  -3   3  -1  299.36   15.37
  -3   3  -1  299.32   14.83
  -3   3  -1  309.90   14.83
  -3   3  -1  304.75   14.50
   3  -3   1  282.49   14.48
  -3   3  -1  301.79   14.48
  -3   3  -1  308.58   14.57
  -3   3  -2    9.57    1.28
  -3   3  -2    9.52    1.07
  -3   3  -2   10.37    1.12
  -3   3  -2   10.57    2.15
  -3   3  -2   10.09    1.41
  -3   3  -2    9.36    1.06
  -3   3  -2   11.54    0.97
  -3   3  -3   13.48    1.14
  -3   3  -3   14.40    1.52
  -3   3  -3   14.33    1.58
  -3   3  -3   16.60    1.49
  -3   3  -3   13.84    1.44
  -3   3  -3   14.69    1.37
  -3   3  -3   15.52    1.43
  -3   3  -4    3.95    0.97
  -3   3  -4    3.85    0.95
  -3   3  -4    2.56    1.03
  -3   3  -4    3.25    0.94
  -3   3  -4    2.02    0.82
  -3   3  -5  109.12    5.95
  -3   3  -5   98.02    5.49
  -3   3  -5  105.47    6.07
  -3   3  -5  112.05    5.94
  -3   3  -5  105.28    5.90
  -3   3  -6   21.45    1.67
  -3   3  -6   27.07    2.26
  -3   3  -6   22.79    2.21
  -3   3  -6   21.31    2.18
  -3   3  -7    1.06    1.14
  -3   3  -7   -0.06    1.05
  -3   3  -7    0.31    0.86
  -3   3  -8   14.68    1.82
  -3   3  -8   17.96    1.84
  -3   3  -8   16.49    1.58
  -3   3  -8   15.05    1.85
  -3   3  -9    2.69    0.87
  -3   3  -9    3.88    1.00
  -3   3  -9    3.32    0.62
   3  -2 -10    4.21    0.98
   3  -2 -10    3.27    0.85
   3  -2  -9   35.60    2.49
   3  -2  -9   36.85    2.70
   3  -2  -9   30.27    2.56
   3  -2  -8  226.70   10.61
   3  -2  -8  241.01   10.83
   3  -2  -7  508.06   23.67
   3  -2  -7  535.21   23.64
   3  -2  -6  279.43   13.04
   3  -2  -6  256.26   12.90
   3  -2  -6  249.75   12.85
   3  -2  -6  243.41   12.75
   3  -2  -6  261.63   12.95
  -3   2   5    5.24    1.47
   3  -2  -5    2.49    0.58
   3  -2  -5    2.49    0.80
   3  -2  -5    4.62    0.92
   3  -2  -5    4.44    0.93
   3  -2  -5    3.72    0.81
   3  -2  -4   71.75    4.29
   3  -2  -4   67.68    3.90
  -3   2   4   79.28    5.20
   3  -2  -4   65.92    3.75
   3  -2  -4   80.36    4.05
   3  -2  -4   72.38    3.98
   3  -2  -4   66.31    3.78
   3  -2  -4   69.14    4.00
   3  -2  -4   75.07    4.01
   3  -2  -3   40.09    2.68
   3  -2  -3   47.17    2.73
   3  -2  -3   49.90    2.67
  -3   2   3   40.11    3.50
   3  -2  -3   48.69    2.72
   3  -2  -3   50.74    2.84
   3  -2  -3   42.23    3.29
  -3   2   2 4088.81  194.52
   3  -2  -2 4074.31  192.62
   3  -2  -2 4113.99  192.63
  -3   2   2 4317.79  193.71
   3  -2  -2 4181.32  192.61
   3  -2  -2 4176.40  192.70
  -3   2   2 3970.16  192.81
  -3   2   1  142.18    8.83
  -3   2   1  133.16    7.09
   3  -2  -1  148.71    6.92
   3  -2  -1  129.42    6.95
   3  -2  -1  145.19    8.11
  -3   2   0   37.84    4.21
   3  -2   0   39.86    3.28
  -3   2   0   37.79    3.94
  -3   2   0   31.16    2.22
  -3   2   0   40.05    2.84
  -3   2   0   31.60    2.08
  -3   2  -1  345.21   18.64
   3  -2   1  388.24   18.34
  -3   2  -1  358.02   16.93
  -3   2  -1  302.76   16.81
  -3   2  -1  362.29   17.39
  -3   2  -1  367.14   16.79
  -3   2  -2  122.35    7.18
  -3   2  -2  114.56    5.70
  -3   2  -2  105.57    5.92
  -3   2  -2  112.70    6.18
   3  -2   2  119.08    7.29
  -3   2  -2  107.49    5.70
  -3   2  -2  107.46    5.68
  -3   2  -3 1196.74   50.09
  -3   2  -3  907.06   46.60
  -3   2  -3  986.75   46.45
  -3   2  -3  834.14   46.54
   3  -2   3  971.68   48.04
  -3   2  -3  997.46   46.66
  -3   2  -3  955.14   46.49
  -3   2  -3  983.39   47.00
  -3   2  -3 1051.15   46.51
  -3   2  -3 1045.84   46.54
  -3   2  -3 1064.19   46.53
  -3   2  -4  257.83   12.39
  -3   2  -4  259.84   12.25
  -3   2  -4  263.76   12.38
  -3   2  -4  223.47   12.21
  -3   2  -4  246.70   12.47
  -3   2  -4  249.00   12.37
  -3   2  -5    2.34    0.93
  -3   2  -5    0.78    0.84
  -3   2  -5    0.59    0.89
  -3   2  -5    1.16    0.64
  -3   2  -5    0.90    0.62
  -3   2  -6   71.41    4.28
  -3   2  -6   64.04    3.90
  -3   2  -6   78.23    4.40
  -3   2  -6   57.28    4.04
  -3   2  -6   73.46    4.35
  -3   2  -7   59.71    3.66
  -3   2  -7   61.65    4.09
  -3   2  -7   61.56    4.01
  -3   2  -8    0.57    0.92
  -3   2  -8    2.24    1.19
  -3   2  -8    1.55    1.17
  -3   2  -8    0.66    1.16
  -3   2  -8    0.82    0.62
  -3   2  -9    6.05    1.02
  -3   2  -9    6.70    1.24
  -3   2  -9    4.83    1.29
   3  -1 -10   43.65    2.75
   3  -1 -10   41.17    2.71
   3  -1 -10   41.04    2.79
   3  -1  -9   70.50    4.08
   3  -1  -9   70.57    3.78
   3  -1  -9   69.01    4.07
   3  -1  -9   80.37    4.28
   3  -1  -8   29.66    2.24
   3  -1  -8   30.01    2.56
   3  -1  -8   26.19    2.20
   3  -1  -7  149.50    7.51
   3  -1  -7  128.83    7.39
   3  -1  -6    0.34    0.80
   3  -1  -6   -0.12    0.53
   3  -1  -6    0.46    0.95
   3  -1  -6    0.64    0.75
   3  -1  -5  227.90   10.92
  -3   1   5  200.95   11.81
   3  -1  -5  223.79   10.88
   3  -1  -5  236.35   10.94
   3  -1  -5  244.54   11.00
   3  -1  -5  212.48   10.77
   3  -1  -5  186.25   10.64
   3  -1  -4    0.72    0.64
   3  -1  -4    1.11    0.64
  -3   1   4    1.05    1.06
  -3   1   4   -0.18    1.77
   3  -1  -4    1.54    0.69
  -3   1   4   -0.16    1.10
   3  -1  -4    1.32    0.61
   3  -1  -4    1.56    0.56
   3  -1  -4    0.51    0.64
   3  -1  -4    0.39    0.49
  -3   1   3  216.02   12.68
   3  -1  -3  228.26   11.60
  -3   1   3  253.86   12.56
   3  -1  -3  248.76   11.58
   3  -1  -3  232.77   11.59
   3  -1  -3  238.78   11.64
   3  -1  -3  242.99   12.12
  -3   1   2   24.62    2.83
  -3   1   2   30.46    3.97
   3  -1  -2   34.37    2.46
  -3   1   2   25.24    2.45
  -3   1   1  511.27   26.42
  -3   1   1  491.39   25.40
  -3   1   1  519.29   24.88
  -3   1   0  749.10   37.47
   3  -1   0  774.19   36.99
  -3   1  -1  182.98   10.42
  -3   1  -2   15.74    2.12
   3  -1   2   15.44    1.94
  -3   1  -2   15.95    2.51
  -3   1  -2   16.82    1.26
  -3   1  -3  673.46   30.94
   3  -1   3  572.69   29.56
  -3   1  -3  575.87   28.65
  -3   1  -3  666.85   29.30
  -3   1  -3  595.99   28.54
  -3   1  -3  604.61   28.61
  -3   1  -3  613.08   28.56
  -3   1  -3  563.27   28.74
  -3   1  -3  614.26   28.62
  -3   1  -4    2.39    0.59
  -3   1  -4    1.88    0.77
  -3   1  -4    1.75    0.95
  -3   1  -4    1.70    0.95
  -3   1  -4    3.09    0.96
  -3   1  -4    0.14    1.90
  -3   1  -4    2.75    0.89
   3  -1   4    0.96    1.12
  -3   1  -5  610.93   27.78
  -3   1  -5  535.59   27.72
  -3   1  -5  582.95   27.83
  -3   1  -5  592.92   27.84
  -3   1  -5  556.75   27.55
  -3   1  -5  609.86   27.87
  -3   1  -6   14.03    1.28
  -3   1  -6   15.80    1.72
  -3   1  -6   12.51    1.46
  -3   1  -7    9.69    1.55
  -3   1  -7    8.26    1.44
  -3   1  -7    5.91    1.16
  -3   1  -8   14.84    2.00
  -3   1  -8   19.46    2.19
  -3   1  -8   17.10    1.71
  -3   1  -8   18.42    2.24
  -3   1  -8   20.31    2.04
  -3   1  -9   43.16    3.21
  -3   1  -9   42.42    2.71
  -3   1  -9   37.95    3.16
  -3   1  -9   43.78    2.99
  -3   1 -10    8.84    1.03
  -3   1 -10    6.61    1.16
   3   0 -10  194.79    9.38
   3   0 -10  181.52    9.25
   3   0 -10  180.70    9.18
   3   0 -10  177.84    9.28
   3   0  -9   40.96    2.81
   3   0  -9   36.36    2.63
   3   0  -9   38.34    2.73
   3   0  -8   16.39    1.46
   3   0  -8   14.91    1.62
   3   0  -8   15.88    1.74
   3   0  -8   13.35    1.72
   3   0  -7    3.78    0.90
   3   0  -7    2.36    1.07
   3   0  -7    4.38    1.17
   3   0  -6  156.60    8.07
   3   0  -6  147.82    8.01
   3   0  -6  166.77    8.26
   3   0  -6  158.94    8.26
   3   0  -5  209.56   10.09
   3   0  -5  201.72    9.94
   3   0  -5  189.70    9.93
   3   0  -5  190.74   10.00
   3   0  -5  203.96   10.10
   3   0  -4   24.65    1.66
  -3   0   4   15.85    2.08
   3   0  -4   22.81    1.66
   3   0  -4   25.13    1.78
  -3   0   4   33.32    2.52
   3   0  -4   24.57    1.79
  -3   0   4   18.31    2.89
   3   0  -4   22.59    1.87
   3   0  -4   23.45    1.62
  -3   0   3 1916.94   93.78
   3   0  -3 1905.35   91.69
  -3   0   3 1979.34   92.71
   3   0  -3 1940.72   91.72
   3   0  -3 2011.57   92.23
   3   0  -3 1957.85   91.74
  -3   0   3 2074.58   92.57
  -3   0   2  256.59   15.15
   3   0  -2  298.56   14.06
  -3   0   2  268.76   14.43
  -3   0   1  590.88   30.73
  -3   0   1  624.90   30.08
   3   0  -1  618.80   29.63
  -3   0   0 3751.82  179.64
  -3   0   0 3844.66  179.22
   3   0   0 3824.30  178.82
  -3   0  -1   94.02    5.91
   3   0   1   92.24    5.42
  -3   0  -2  522.25   26.23
  -3   0  -2  552.20   25.96
   3   0   2  505.75   25.62
  -3   0  -3    0.13    0.62
   3   0   3    0.65    1.84
  -3   0  -3    0.14    0.58
  -3   0  -3    0.34    0.52
  -3   0  -3    0.22    0.55
  -3   0  -3    0.05    0.61
  -3   0  -3    1.61    1.54
   3   0   3    0.81    0.74
  -3   0  -4 1010.73   46.14
  -3   0  -4  940.78   46.09
  -3   0  -4  866.51   47.64
   3   0   4  931.34   46.59
  -3   0  -4 1019.25   46.19
  -3   0  -4 1020.27   46.52
  -3   0  -4  975.17   46.16
  -3   0  -4  972.68   46.24
  -3   0  -5 1101.59   51.67
  -3   0  -5 1075.87   51.54
  -3   0  -5 1082.73   51.62
  -3   0  -5 1041.76   51.69
  -3   0  -5 1163.99   51.76
  -3   0  -6   -0.39    0.98
  -3   0  -6    0.21    0.64
  -3   0  -6    0.47    0.94
  -3   0  -6   -0.60    0.87
  -3   0  -6    0.34    0.88
  -3   0  -7   22.54    1.78
  -3   0  -7   25.45    2.10
  -3   0  -7   20.72    2.17
  -3   0  -8    4.65    0.83
  -3   0  -8    4.93    1.54
  -3   0  -8    5.56    1.18
  -3   0  -8    3.20    1.50
  -3   0  -9   21.59    2.30
  -3   0  -9   18.65    2.32
  -3   0  -9   20.20    2.05
  -3   0 -10   26.75    1.82
  -3   0 -10   26.08    2.00
   3   1 -10    2.19    0.68
   3   1 -10    2.58    0.67
   3   1  -9    1.81    0.79
   3   1  -9    1.25    0.93
   3   1  -9    1.09    0.89
   3   1  -9    0.61    0.91
   3   1  -9    1.16    0.68
   3   1  -8   58.43    3.70
   3   1  -8   62.09    3.90
   3   1  -8   52.54    3.64
   3   1  -8   59.93    3.88
   3   1  -7    0.16    0.67
   3   1  -7   -0.11    0.98
   3   1  -7    0.05    1.04
   3   1  -7   -0.05    1.01
   3   1  -7    0.62    0.86
   3   1  -6   16.39    1.36
   3   1  -6   12.33    1.46
   3   1  -6   13.47    1.42
   3   1  -6   16.37    1.71
   3   1  -5    8.45    0.93
   3   1  -5    8.43    1.08
   3   1  -5    8.38    1.17
   3   1  -5    7.26    1.02
  -3  -1   4  544.66   29.04
   3   1  -4  574.91   28.21
   3   1  -4  572.64   28.81
   3   1  -4  630.58   28.43
  -3  -1   4  570.79   28.91
   3   1  -4  647.19   28.43
   3   1  -4  590.24   28.32
  -3  -1   3 1530.22   68.74
   3   1  -3 1458.86   68.07
   3   1  -3 1529.04   68.09
  -3  -1   3 1391.26   69.39
  -3  -1   3 1411.27   68.84
   3   1  -3 1392.00   68.01
   3   1  -3 1405.96   68.04
   3   1  -3 1475.91   68.67
  -3  -1   2  205.29   11.31
   3   1  -2  200.31   10.44
  -3  -1   2  202.96   10.67
  -3  -1   1   94.25    5.43
  -3  -1   1   95.07    5.99
   3   1  -1   88.77    5.21
   3   1   0   88.45    5.14
  -3  -1   0   94.24    5.35
  -3  -1   0   88.24    5.76
   3   1   1    2.23    1.93
   3   1   1    3.64    0.89
   3   1   2  749.15   36.80
  -3  -1  -2  811.17   36.24
  -3  -1  -2  707.27   36.04
   3   1   2  726.94   35.70
  -3  -1  -3   52.23    3.18
  -3  -1  -3   63.82    3.26
  -3  -1  -3   52.43    3.17
   3   1   3   66.21    4.83
   3   1   3   57.70    3.61
  -3  -1  -3   67.78    4.10
  -3  -1  -4    2.26    0.58
  -3  -1  -4    2.31    0.91
  -3  -1  -4    1.88    0.74
  -3  -1  -4    2.94    0.78
  -3  -1  -4    2.73    0.78
  -3  -1  -4    4.15    1.35
   3   1   4    3.16    1.82
  -3  -1  -4    4.36    1.21
  -3  -1  -4    1.96    0.84
   3   1   4    3.60    0.82
  -3  -1  -5    7.67    1.28
  -3  -1  -5    8.87    1.13
  -3  -1  -5   10.04    1.25
  -3  -1  -5   11.43    1.36
  -3  -1  -5    8.22    1.26
  -3  -1  -5    9.56    1.25
  -3  -1  -5    9.46    1.03
  -3  -1  -5    6.38    1.42
  -3  -1  -6   20.93    2.01
  -3  -1  -6   21.61    1.78
  -3  -1  -6   18.99    1.97
  -3  -1  -6   25.07    1.98
  -3  -1  -7    3.27    0.89
  -3  -1  -7    1.32    1.04
  -3  -1  -8    3.40    0.95
  -3  -1  -8    3.86    1.30
  -3  -1  -8    5.33    1.26
  -3  -1  -8    3.13    1.53
  -3  -1  -9    1.84    1.37
  -3  -1  -9    2.35    0.75
  -3  -1  -9    2.79    1.11
  -3  -1  -9    1.13    1.43
  -3  -1 -10   11.91    1.32
   3   2  -9   15.75    1.52
   3   2  -9   12.53    1.44
   3   2  -9   13.37    1.44
   3   2  -9   11.90    1.25
   3   2  -8   10.66    1.23
   3   2  -8   11.02    1.48
   3   2  -8   10.90    1.58
   3   2  -8   11.20    1.46
   3   2  -8    7.45    1.08
   3   2  -8    9.75    1.56
   3   2  -7    1.65    0.91
   3   2  -7    3.15    1.25
   3   2  -7    1.40    1.30
   3   2  -7    2.55    1.34
   3   2  -7    2.61    1.19
   3   2  -7    1.89    0.89
   3   2  -6   77.70    4.35
   3   2  -6   61.91    4.07
   3   2  -6   71.53    4.40
   3   2  -6   70.31    4.42
   3   2  -6   79.22    4.47
   3   2  -5  473.19   22.02
   3   2  -5  462.58   21.98
   3   2  -5  429.23   21.55
   3   2  -5  494.24   21.99
   3   2  -5  424.82   21.71
   3   2  -4  935.05   43.25
   3   2  -4  857.96   43.03
   3   2  -4  895.06   43.01
   3   2  -4  989.18   43.30
   3   2  -3    4.13    2.34
  -3  -2   3    1.78    1.14
   3   2  -3    4.83    0.87
   3   2  -3    4.58    0.73
   3   2  -3    4.86    0.86
   3   2  -3    4.31    0.87
  -3  -2   3    3.05    1.02
   3   2  -3    2.91    0.67
   3   2  -3    3.91    1.04
   3   2  -2   46.70    4.72
   3   2  -2   38.63    2.42
  -3  -2   2   44.23    3.12
  -3  -2   2   46.04    3.49
   3   2  -2   39.87    2.44
   3   2  -2   39.27    2.45
   3   2  -2   39.86    2.42
   3   2  -1  395.69   21.20
  -3  -2   1  391.18   19.73
  -3  -2   1  407.38   20.19
   3   2  -1  400.90   19.76
   3   2   0  684.39   32.90
  -3  -2   0  678.70   32.88
   3   2   1  663.79   31.00
   3   2   1  597.16   29.93
   3   2   2   19.44    2.72
   3   2   2   22.37    1.96
  -3  -2  -2   21.95    2.32
  -3  -2  -2   24.22    2.13
  -3  -2  -3  320.26   15.85
  -3  -2  -3  340.93   15.87
   3   2   3  333.16   17.35
   3   2   3  340.45   16.40
  -3  -2  -3  297.53   16.60
  -3  -2  -3  317.27   15.96
  -3  -2  -3  332.23   15.84
  -3  -2  -3  356.05   16.99
  -3  -2  -4   -0.03    0.64
  -3  -2  -4    0.69    0.88
  -3  -2  -4    0.03    0.56
  -3  -2  -4    0.06    0.70
  -3  -2  -4   -0.21    0.86
  -3  -2  -4    0.49    0.65
   3   2   4    0.74    1.46
   3   2   4   -0.05    0.55
  -3  -2  -4   -0.16    1.06
  -3  -2  -5   76.51    4.81
  -3  -2  -5   79.12    4.19
  -3  -2  -5   74.17    4.02
  -3  -2  -5   67.52    3.95
   3   2   5   75.46    5.53
  -3  -2  -5   77.78    4.06
  -3  -2  -5   72.76    3.90
  -3  -2  -5   78.36    4.03
  -3  -2  -5   79.56    4.29
  -3  -2  -6    2.78    0.96
  -3  -2  -6    3.31    1.01
  -3  -2  -6    4.70    0.94
  -3  -2  -6    3.03    1.13
  -3  -2  -6    3.90    0.98
  -3  -2  -7    8.49    1.30
   3   2   7    6.88    1.14
  -3  -2  -7    6.54    1.73
  -3  -2  -7   10.30    1.49
  -3  -2  -7    9.96    1.48
  -3  -2  -7    7.41    1.61
  -3  -2  -8   17.66    1.78
  -3  -2  -8   20.19    2.05
  -3  -2  -8   13.98    2.31
  -3  -2  -8   19.67    2.08
  -3  -2  -9   13.92    1.46
  -3  -2  -9   11.30    1.99
  -3  -2  -9   14.86    1.80
  -3  -2 -10   18.51    1.49
  -3  -2 -10   19.85    1.94
  -3  -2 -11    0.50    0.51
   3   3  -9   -0.26    0.50
   3   3  -9    0.32    0.62
   3   3  -9   -0.22    0.53
   3   3  -9    0.41    0.66
   3   3  -8    0.36    0.65
   3   3  -8    1.33    0.91
   3   3  -8    0.87    0.93
   3   3  -8    1.90    0.94
   3   3  -8    1.29    1.01
   3   3  -7   23.92    2.11
   3   3  -7   26.13    2.42
   3   3  -7   24.47    2.31
   3   3  -7   23.90    2.42
   3   3  -7   25.12    2.26
   3   3  -6   11.07    1.25
   3   3  -6   15.30    1.67
   3   3  -6   15.05    1.83
   3   3  -6   14.23    1.66
   3   3  -6   15.14    1.87
   3   3  -6   16.50    1.88
   3   3  -6   14.81    1.32
   3   3  -5  133.68    7.67
   3   3  -5  159.00    8.11
   3   3  -5  163.73    8.15
   3   3  -5  160.68    7.88
   3   3  -4    0.28    0.60
   3   3  -4    0.17    0.71
   3   3  -4    0.74    0.75
   3   3  -4    0.53    0.85
   3   3  -4    0.41    0.48
   3   3  -3  121.82    8.81
   3   3  -3  136.76    6.80
   3   3  -3  134.08    6.74
  -3  -3   3  125.35    7.50
   3   3  -3  113.67    6.39
   3   3  -3  135.97    6.87
   3   3  -3  137.41    6.77
   3   3  -3  132.16    6.66
   3   3  -3  122.91    6.56
   3   3  -2 1153.53   55.67
   3   3  -2 1114.32   53.13
  -3  -3   2 1101.77   54.02
   3   3  -2 1147.63   53.21
  -3  -3   2 1114.16   54.07
   3   3  -2 1066.37   53.12
   3   3  -2 1115.89   53.19
   3   3  -2 1157.71   53.27
   3   3  -2 1145.59   53.18
   3   3  -2 1152.86   54.20
   3   3  -2 1149.76   53.16
  -3  -3   1 1948.50   87.73
   3   3  -1 1851.29   86.52
   3   3  -1 2036.57   88.95
   3   3  -1 1784.51   86.56
   3   3  -1 1948.46   87.56
   3   3  -1 1833.99   86.56
   3   3  -1 1812.48   86.48
   3   3  -1 1858.76   86.60
  -3  -3   1 1903.91   87.42
   3   3  -1 1800.12   86.53
   3   3   0   30.09    2.48
   3   3   0   26.07    3.21
  -3  -3   0   30.06    2.69
  -3  -3   0   29.83    2.37
   3   3   0   20.91    1.69
   3   3   1    6.79    0.88
  -3  -3  -1    9.19    1.78
   3   3   1    9.18    2.18
   3   3   1    7.55    0.90
   3   3   1    9.97    1.45
   3   3   2  248.83   12.46
  -3  -3  -2  233.89   11.39
   3   3   2  226.68   11.45
   3   3   2  197.97   10.65
   3   3   2  220.57   10.71
  -3  -3  -3 1189.47   58.97
  -3  -3  -3 1280.33   58.87
   3   3   3 1256.03   58.88
  -3  -3  -3 1223.45   58.79
  -3  -3  -3 1385.28   59.69
  -3  -3  -3 1174.32   59.09
   3   3   3 1340.15   60.71
   3   3   3 1381.30   59.69
  -3  -3  -3 1399.11   60.36
  -3  -3  -3 1164.94   59.00
   3   3   3 1257.18   58.91
  -3  -3  -4   47.58    3.13
  -3  -3  -4   51.93    2.97
  -3  -3  -4   46.74    2.82
  -3  -3  -4   53.58    2.93
  -3  -3  -4   46.00    3.50
   3   3   4   47.50    2.84
  -3  -3  -4   41.67    3.22
   3   3   4   52.08    3.39
  -3  -3  -4   46.38    3.05
   3   3   4   50.20    2.96
  -3  -3  -4   59.12    4.24
   3   3   4   54.02    4.44
  -3  -3  -5    2.38    0.81
  -3  -3  -5    0.87    1.10
  -3  -3  -5    2.12    0.71
  -3  -3  -5    1.36    0.76
  -3  -3  -5    2.91    0.81
  -3  -3  -5    2.31    1.03
  -3  -3  -5    0.44    0.71
   3   3   5    2.10    0.71
  -3  -3  -6    0.63    1.16
  -3  -3  -6    1.16    0.81
  -3  -3  -6    1.22    0.81
  -3  -3  -6    0.96    0.79
  -3  -3  -6    0.32    0.63
   3   3   6    0.40    0.64
  -3  -3  -7    5.05    1.20
  -3  -3  -7    4.36    1.60
  -3  -3  -7    5.15    1.19
  -3  -3  -7    5.12    1.12
  -3  -3  -7    3.92    1.17
   3   3   7    3.89    0.89
  -3  -3  -8    4.20    1.21
  -3  -3  -8    3.79    1.82
  -3  -3  -8    4.07    1.38
  -3  -3  -8    3.57    1.34
  -3  -3  -9    1.64    0.99
  -3  -3  -9    0.23    1.09
  -3  -3  -9    0.75    1.08
  -3  -3 -10    0.07    0.66
  -3  -3 -10    0.93    0.88
  -3  -3 -10    0.17    0.82
   3   3  11    0.88    0.62
  -3  -3 -11    2.57    0.63
   3   4  -8   -0.23    0.59
   3   4  -8    0.56    0.60
   3   4  -8    0.04    0.73
   3   4  -8   -0.04    0.82
   3   4  -8    0.65    0.82
   3   4  -7    4.58    1.03
   3   4  -7    7.67    1.21
   3   4  -7    5.27    1.27
   3   4  -7    6.83    1.36
   3   4  -7    6.63    1.34
   3   4  -6  255.75   12.54
   3   4  -6  244.39   13.04
   3   4  -6  248.84   12.97
   3   4  -6  224.08   12.72
   3   4  -6  272.78   13.06
   3   4  -6  261.74   12.90
   3   4  -5   22.41    2.09
   3   4  -5   23.34    2.21
   3   4  -5   21.08    2.15
   3   4  -5   19.48    1.97
   3   4  -5   22.94    1.87
   3   4  -4   14.68    1.66
   3   4  -4   14.65    1.28
   3   4  -4   16.27    1.76
   3   4  -4   18.03    1.61
   3   4  -3   23.37    1.85
  -3  -4   3   19.67    2.46
   3   4  -3   25.13    1.74
   3   4  -3   27.27    2.08
   3   4  -3   26.41    2.15
   3   4  -3   26.22    2.05
   3   4  -3   23.52    1.98
   3   4  -3   25.10    2.14
   3   4  -3   26.46    1.99
   3   4  -2  244.89   12.16
   3   4  -2  248.20   12.19
   3   4  -2  241.95   11.96
  -3  -4   2  231.78   13.12
   3   4  -2  251.89   12.19
   3   4  -2  237.96   12.24
   3   4  -2  242.10   12.20
   3   4  -2  251.29   12.35
   3   4  -2  218.27   14.22
   3   4  -2  249.57   12.18
   3   4  -1  710.13   35.05
   3   4  -1  678.50   32.70
   3   4  -1  675.40   32.79
   3   4  -1  681.19   32.63
   3   4  -1  701.66   32.90
   3   4  -1  706.37   32.86
   3   4  -1  661.92   32.78
   3   4  -1  716.50   32.70
  -3  -4   1  672.57   32.75
  -3  -4   1  690.56   33.84
  -3  -4   1  689.87   33.76
   3   4   0  628.06   29.25
  -3  -4   0  567.90   27.99
   3   4   0  580.24   27.19
   3   4   0  581.25   27.23
  -3  -4   0  538.22   27.13
  -3  -4   0  603.46   28.40
   3   4   0  532.72   26.93
   3   4   0  606.15   27.14
   3   4   0  553.29   26.95
   3   4   1   13.91    1.39
   3   4   1   17.82    1.58
   3   4   1   17.31    1.55
  -3  -4  -1   14.84    1.55
   3   4   1   17.17    2.06
   3   4   1   16.52    1.42
  -3  -4  -1   16.15    2.28
   3   4   2   -0.08    0.92
  -3  -4  -2    0.35    0.81
   3   4   2    0.60    0.64
   3   4   2    1.11    0.71
  -3  -4  -2    1.25    0.54
   3   4   2    0.49    1.58
   3   4   2    0.71    0.66
  -3  -4  -2    0.63    0.86
  -3  -4  -2    0.70    0.83
  -3  -4  -3   25.08    1.72
  -3  -4  -3   21.82    1.52
  -3  -4  -3   23.48    1.76
  -3  -4  -3   22.60    2.22
   3   4   3   22.89    3.05
   3   4   3   19.67    2.21
   3   4   3   23.04    1.77
   3   4   3   24.50    1.82
  -3  -4  -4   73.60    4.15
  -3  -4  -4   76.25    4.06
   3   4   4   76.45    5.93
  -3  -4  -4   69.01    4.05
  -3  -4  -4   77.79    4.85
  -3  -4  -4   70.00    4.00
   3   4   4   74.56    4.18
  -3  -4  -4   80.92    4.43
   3   4   4   79.28    4.21
   3   4   5   37.45    4.02
  -3  -4  -5   35.39    2.38
  -3  -4  -5   31.52    2.12
  -3  -4  -5   37.29    2.31
  -3  -4  -5   30.53    2.21
  -3  -4  -5   31.59    2.41
   3   4   5   31.04    2.23
  -3  -4  -6    9.25    1.31
  -3  -4  -6    6.94    1.20
  -3  -4  -6    8.12    1.13
  -3  -4  -6    5.82    0.90
  -3  -4  -6    8.94    1.19
   3   4   6    8.93    1.09
  -3  -4  -7   24.77    2.12
  -3  -4  -7   22.75    1.97
  -3  -4  -7   19.15    1.78
  -3  -4  -7   21.59    2.00
  -3  -4  -7   19.38    2.02
  -3  -4  -8    8.68    1.41
  -3  -4  -8    9.06    1.49
  -3  -4  -9   11.33    1.52
  -3  -4  -9   10.01    1.55
  -3  -4  -9   10.49    1.45
   3   4  10    0.72    1.01
  -3  -4 -10   -0.50    0.84
  -3  -4 -10    0.75    0.92
  -3  -4 -10   -0.54    0.88
   3   4  11   -0.15    0.58
  -3  -4 -11    1.21    0.54
   3   5  -8   57.63    3.62
   3   5  -8   65.67    3.55
   3   5  -8   57.76    3.61
   3   5  -7   42.58    2.86
   3   5  -7   39.44    2.99
   3   5  -7   43.91    3.01
   3   5  -7   40.80    3.03
   3   5  -6   28.49    2.38
   3   5  -6   26.82    2.52
   3   5  -6   27.12    2.57
   3   5  -6   27.76    2.08
   3   5  -5   21.24    2.25
   3   5  -5   18.97    2.16
   3   5  -5   16.38    1.77
   3   5  -5   18.27    1.76
   3   5  -4   26.34    1.98
   3   5  -4   25.96    2.25
   3   5  -4   30.55    2.53
   3   5  -4   31.33    2.50
   3   5  -4   27.66    2.29
   3   5  -3   47.73    3.20
   3   5  -3   55.57    3.42
   3   5  -3   45.74    2.99
   3   5  -3   48.32    3.26
   3   5  -3   52.79    3.42
   3   5  -3   49.20    3.31
   3   5  -2   14.26    1.53
   3   5  -2   13.10    1.56
   3   5  -2   16.07    1.40
   3   5  -2   15.19    1.73
   3   5  -2   16.12    1.56
   3   5  -2   13.57    1.68
   3   5  -1  298.02   16.81
   3   5  -1  283.85   14.49
   3   5  -1  300.27   14.31
   3   5  -1  306.06   14.64
   3   5  -1  301.17   14.66
  -3  -5   1  283.63   14.32
   3   5  -1  307.31   14.42
   3   5  -1  303.88   14.49
   3   5  -1  258.10   14.04
   3   5  -1  299.30   14.36
   3   5   0  177.30   11.06
   3   5   0  175.46    8.84
   3   5   0  166.97    8.73
   3   5   0  179.13    9.13
   3   5   0  178.79    9.14
  -3  -5   0  175.54    8.95
   3   5   0  172.39    8.78
  -3  -5   0  151.33    9.76
   3   5   0  178.80    8.94
   3   5   0  170.02    8.69
   3   5   1   11.80    1.13
   3   5   1   11.45    1.20
  -3  -5  -1    9.97    1.46
   3   5   1   11.24    2.46
   3   5   1   13.52    1.40
   3   5   1   15.30    1.54
   3   5   1   12.15    1.25
  -3  -5  -1   12.76    1.87
   3   5   1   12.31    1.59
   3   5   1   14.41    1.65
  -3  -5  -2   26.02    1.74
  -3  -5  -2   28.25    2.22
  -3  -5  -2   29.27    2.68
  -3  -5  -2   25.19    2.16
   3   5   2   28.24    2.03
   3   5   2   26.41    2.00
   3   5   2   27.52    2.12
  -3  -5  -3   11.50    1.07
  -3  -5  -3   10.05    1.30
  -3  -5  -3   12.99    1.49
   3   5   3   10.52    1.22
   3   5   3    9.49    1.29
  -3  -5  -3    7.25    1.40
   3   5   3    9.58    2.32
  -3  -5  -4   56.98    3.27
  -3  -5  -4   50.94    3.04
   3   5   4   56.17    3.42
  -3  -5  -4   46.91    3.88
  -3  -5  -4   55.87    3.35
   3   5   4   53.69    3.26
   3   5   5   42.57    2.81
  -3  -5  -5   47.25    2.90
  -3  -5  -5   45.15    3.09
  -3  -5  -5   46.47    2.72
  -3  -5  -5   38.73    2.73
  -3  -5  -5   40.86    2.70
   3   5   5   42.65    2.76
  -3  -5  -6   22.91    2.14
  -3  -5  -6   27.74    2.11
  -3  -5  -6   26.85    1.92
  -3  -5  -6   17.78    1.69
  -3  -5  -6   20.61    1.86
  -3  -5  -6   22.15    2.11
   3   5   6   22.79    2.27
  -3  -5  -7  104.55    5.56
  -3  -5  -7  102.45    5.41
  -3  -5  -7   83.51    5.32
  -3  -5  -7   91.09    5.40
   3   5   7   87.87    5.72
   3   5   8    0.07    1.26
  -3  -5  -8   -0.33    1.01
  -3  -5  -8   -0.39    0.94
  -3  -5  -8    0.34    0.86
   3   5   9    1.25    1.24
  -3  -5  -9    3.63    1.15
  -3  -5  -9    3.67    1.04
   3   5  10    8.28    1.37
  -3  -5 -10    7.55    1.14
  -3  -5 -10    6.44    1.06
   3   6  -7   23.59    1.73
   3   6  -7   17.00    1.67
   3   6  -7   16.46    1.63
   3   6  -7   24.88    1.88
   3   6  -6    3.92    0.85
   3   6  -6    4.58    1.10
   3   6  -6    2.24    1.14
   3   6  -5    6.92    1.19
   3   6  -5    5.53    1.50
   3   6  -5    5.22    1.45
   3   6  -5    5.15    1.49
   3   6  -4    8.18    1.13
   3   6  -4   10.30    1.58
   3   6  -4   10.28    1.49
   3   6  -4    9.27    1.73
   3   6  -4    9.98    1.77
   3   6  -4   11.95    1.92
   3   6  -3  303.56   14.57
   3   6  -3  270.61   14.16
   3   6  -3  294.16   14.62
   3   6  -3  272.32   14.40
   3   6  -3  297.91   14.56
   3   6  -2    3.11    1.16
   3   6  -2    1.63    0.61
   3   6  -2    1.52    0.95
   3   6  -2    2.30    1.04
   3   6  -2    1.80    1.23
   3   6  -2    2.15    1.33
   3   6  -2    1.76    0.79
   3   6  -1    5.45    0.86
   3   6  -1    5.28    1.06
   3   6  -1    6.08    1.08
   3   6  -1    6.27    1.31
   3   6  -1    6.59    1.49
  -3  -6   1    4.91    0.99
   3   6  -1    5.06    1.19
   3   6  -1    5.83    1.21
   3   6   0    0.18    0.70
   3   6   0    1.29    1.28
   3   6   0   -0.09    0.84
   3   6   0    0.19    1.13
   3   6   0   -0.04    0.72
   3   6   0    0.34    0.83
   3   6   0   -0.28    0.88
   3   6   1    1.16    0.63
   3   6   1    0.77    0.78
   3   6   1    1.31    1.03
   3   6   1    0.85    0.86
   3   6   1    0.69    0.76
   3   6   1    0.90    0.89
   3   6   2    1.01    0.78
   3   6   2    1.03    0.93
  -3  -6  -2    0.85    0.98
   3   6   2    0.82    0.77
   3   6   3    2.74    0.99
  -3  -6  -3    2.16    0.66
   3   6   3    2.42    0.99
  -3  -6  -3    1.44    0.98
  -3  -6  -3    2.05    1.12
   3   6   3    1.68    0.81
   3   6   4    6.39    1.27
  -3  -6  -4    6.67    1.00
  -3  -6  -4    9.17    1.32
   3   6   4    4.98    0.99
   3   6   4    5.82    1.14
  -3  -6  -5   36.80    2.52
   3   6   5   36.45    2.63
  -3  -6  -5   38.17    2.75
  -3  -6  -5   32.75    2.48
  -3  -6  -5   39.44    2.90
  -3  -6  -6   94.71    5.16
  -3  -6  -6   88.34    4.85
  -3  -6  -6   80.02    4.94
  -3  -6  -6   90.95    5.39
  -3  -6  -6   91.13    5.38
   3   6   7    6.19    1.64
  -3  -6  -7    6.51    1.31
  -3  -6  -7    4.71    1.40
  -3  -6  -7    3.49    0.95
  -3  -6  -7    5.67    1.30
  -3  -6  -7    6.07    1.00
   3   6   8    3.87    1.44
  -3  -6  -8    4.67    1.23
  -3  -6  -8    2.30    0.74
  -3  -6  -8    3.78    0.99
  -3  -6  -8    4.02    0.94
   3   6   9   -0.63    1.02
  -3  -6  -9    0.14    0.85
   3   6  10    0.77    0.77
  -3  -6 -10   -0.07    0.67
  -3  -6 -10    0.08    0.50
  -3  -7   6   13.88    1.56
   3   7  -6   20.57    1.44
   3   7  -5    6.46    1.39
   3   7  -5    7.01    1.10
   3   7  -5    7.07    1.25
   3   7  -5    5.05    1.28
   3   7  -5    6.73    1.43
   3   7  -4   67.48    4.08
   3   7  -4   59.05    4.24
   3   7  -4   59.10    4.22
   3   7  -4   62.63    4.17
   3   7  -4   56.75    3.50
   3   7  -4   58.64    3.84
   3   7  -3  121.92    6.82
   3   7  -3  115.47    7.21
   3   7  -3  128.69    6.94
   3   7  -3  120.17    6.58
   3   7  -3  115.58    7.22
   3   7  -3  126.71    7.10
   3   7  -2   29.09    2.35
   3   7  -2   25.73    2.11
   3   7  -2   27.89    2.51
   3   7  -2   27.95    2.43
   3   7  -2   28.77    2.44
   3   7  -2   19.96    1.76
   3   7  -1   52.56    3.84
   3   7  -1   51.39    3.53
   3   7  -1   53.84    3.78
   3   7  -1   59.07    3.79
   3   7  -1   56.66    3.58
   3   7   0    2.62    0.91
   3   7   0    2.67    0.92
  -3  -7   0    3.06    1.04
  -3  -7   0    1.50    1.51
   3   7   0    1.18    1.02
   3   7   0    2.45    1.01
   3   7   0    2.59    1.18
   3   7   1    4.04    1.03
   3   7   1    2.91    1.09
   3   7   1    1.71    1.14
   3   7   1    3.01    0.79
  -3  -7  -1    3.32    1.12
   3   7   1    3.81    1.05
   3   7   1    3.34    1.08
   3   7   2   11.02    1.46
   3   7   2   11.08    1.67
  -3  -7  -2   11.94    1.68
   3   7   2    8.72    1.40
   3   7   3    0.72    1.13
   3   7   3   -0.06    1.22
  -3  -7  -3   -0.49    1.17
  -3  -7  -3   -0.56    1.37
   3   7   3    1.08    0.95
   3   7   4   10.71    1.64
  -3  -7  -4   11.64    1.19
   3   7   4   13.00    1.66
  -3  -7  -4    9.41    1.52
   3   7   4    8.34    1.24
  -3  -7  -4   11.26    1.78
  -3  -7  -5   59.95    3.65
   3   7   5   60.30    3.93
  -3  -7  -5   61.10    3.98
  -3  -7  -5   55.83    3.80
   3   7   5   57.97    4.02
  -3  -7  -6    2.36    0.98
  -3  -7  -6    2.61    1.02
  -3  -7  -6    1.82    1.27
  -3  -7  -6    0.67    1.08
   3   7   7    2.92    1.31
  -3  -7  -7    3.07    1.06
  -3  -7  -7    1.94    1.11
  -3  -7  -7    3.75    1.24
  -3  -7  -7    2.56    0.90
   3   7   8    1.63    1.17
  -3  -7  -8    0.73    0.90
  -3  -7  -8    0.56    0.63
  -3  -7  -8    0.77    0.77
  -3  -7  -9   22.93    1.77
   3   7   9   16.91    1.87
   3   7  10    5.11    0.91
  -3  -7 -10    8.05    0.89
   3   8  -5    0.45    0.53
   3   8  -5    0.38    0.70
  -3  -8   5    0.24    0.68
   3   8  -5   -0.13    0.86
   3   8  -4    0.33    0.77
   3   8  -4    0.63    0.50
  -3  -8   4    0.61    1.05
   3   8  -4    0.99    0.93
   3   8  -4    0.50    1.04
   3   8  -3    2.96    0.82
   3   8  -3    4.03    1.13
  -3  -8   3    3.83    1.42
   3   8  -3    1.75    1.29
   3   8  -2  195.37   10.40
  -3  -8   2  177.13   10.44
   3   8  -2  202.45   10.25
   3   8  -2  186.87   10.04
   3   8  -2  197.40   10.49
   3   8  -2  211.22   10.36
   3   8  -1   53.48    3.67
  -3  -8   1   45.41    3.69
   3   8  -1   49.14    3.26
   3   8  -1   44.93    3.23
   3   8  -1   49.11    3.53
   3   8  -1   51.39    3.46
   3   8  -1   40.09    2.91
   3   8   0    4.44    1.37
   3   8   0    4.05    1.06
   3   8   0    3.64    1.51
   3   8   0    3.71    1.26
   3   8   0    4.75    1.04
  -3  -8   0    4.01    1.77
  -3  -8   0    3.45    1.05
   3   8   0    4.82    1.33
   3   8   1    2.15    0.94
   3   8   1    1.51    1.11
   3   8   1    3.78    1.47
  -3  -8  -1    2.58    1.55
  -3  -8  -1    3.63    1.13
   3   8   1    2.90    1.11
   3   8   2    0.87    1.05
   3   8   2   -0.52    1.30
  -3  -8  -2   -0.25    1.14
   3   8   2    0.21    0.94
   3   8   3    5.19    1.39
   3   8   3    4.75    1.51
  -3  -8  -3    4.07    1.52
  -3  -8  -3    2.14    1.39
   3   8   3    3.33    1.08
   3   8   4    0.92    1.27
   3   8   4   -0.07    1.19
  -3  -8  -4    0.27    1.00
  -3  -8  -4    1.29    1.25
  -3  -8  -4    0.67    1.40
   3   8   4    1.22    0.88
   3   8   5    1.26    1.18
   3   8   5    0.55    1.07
  -3  -8  -5    0.17    0.96
  -3  -8  -5   -0.53    1.03
  -3  -8  -5    0.20    1.34
  -3  -8  -6    3.94    0.89
  -3  -8  -6    3.38    1.13
  -3  -8  -6    2.94    1.02
  -3  -8  -6    3.75    1.38
   3   8   7    0.18    1.10
  -3  -8  -7    0.11    0.87
  -3  -8  -7    0.58    0.70
  -3  -8  -7    1.00    0.75
  -3  -8  -7    0.66    0.98
  -3  -8  -8   17.92    1.46
  -3  -8  -8   19.59    1.65
   3   8   8   17.83    1.75
   3   8   9    1.92    0.79
  -3  -8  -9    2.16    0.62
   3   8   9    1.22    0.60
   3   9  -4    0.69    0.64
  -3  -9   4    1.20    0.65
   3   9  -4    2.05    0.80
   3   9  -3    0.41    0.67
   3   9  -3    0.10    0.49
   3   9  -3    0.12    0.76
  -3  -9   3    0.66    0.88
   3   9  -2    9.83    1.28
   3   9  -2    7.01    1.08
   3   9  -2    8.81    1.23
  -3  -9   2    8.20    1.46
   3   9  -1    0.60    1.21
   3   9  -1    0.24    0.73
   3   9  -1    0.86    1.39
   3   9  -1   -0.36    1.11
   3   9  -1    1.20    1.01
  -3  -9   1    1.90    1.51
   3   9  -1   -0.29    1.21
   3   9   0    0.98    0.96
   3   9   0    1.17    0.72
   3   9   0    1.65    1.24
   3   9   0    0.25    0.93
   3   9   1    0.15    0.89
   3   9   1    0.40    0.79
   3   9   1    0.58    1.33
   3   9   1   -0.05    0.98
  -3  -9  -1   -1.27    1.37
  -3  -9  -1    0.58    0.84
   3   9   2    3.07    0.99
   3   9   2    3.20    1.02
   3   9   2    4.75    1.55
  -3  -9  -2    5.56    1.25
   3   9   3   -0.17    0.72
   3   9   3    0.90    0.98
   3   9   3   -0.43    1.29
   3   9   3   -0.23    1.16
  -3  -9  -3    0.18    0.72
  -3  -9  -3    0.85    1.10
   3   9   4   10.97    1.87
   3   9   4   11.66    1.98
   3   9   4   11.80    1.95
  -3  -9  -4    9.15    1.56
  -3  -9  -4   11.93    2.07
  -3  -9  -4   12.07    2.04
   3   9   5   -0.33    1.02
   3   9   5    1.13    0.95
  -3  -9  -5    1.63    1.18
  -3  -9  -5    1.73    0.82
  -3  -9  -5    1.78    1.02
  -3  -9  -6   14.89    1.52
   3   9   6   13.62    1.65
  -3  -9  -6   15.43    1.53
   3   9   7    8.25    1.28
  -3  -9  -7    8.27    1.11
   3   9   8   -0.04    0.68
  -3  -9  -8    0.41    0.61
   3  10  -2    2.91    0.66
  -3 -10   2    2.48    0.72
   3  10  -1    2.71    0.72
   3  10  -1    3.12    0.88
   3  10  -1    1.89    0.68
  -3 -10   1    2.91    0.92
   3  10   0    0.32    0.68
   3  10   0    0.37    0.48
   3  10   0   -0.53    0.77
  -3 -10   0    0.35    0.90
  -3 -10   0    0.95    0.61
   3  10   1    2.40    0.77
   3  10   1    1.67    0.68
   3  10   1    1.39    0.84
   3  10   2    0.48    0.61
   3  10   2   -0.07    0.66
   3  10   2    0.12    1.10
  -3 -10  -2    0.65    0.74
  -3 -10  -2    0.56    1.01
  -3 -10  -3    2.76    0.98
   3  10   3    1.84    0.81
   3  10   3    2.47    1.16
   3  10   3    1.76    0.99
   3  10   4    0.57    0.74
   3  10   4    0.64    0.94
   3  10   4    0.99    0.87
  -3 -10  -4    1.60    0.87
  -3 -10  -4    0.90    0.88
   3  10   5   10.89    1.35
   3  10   5   15.19    1.49
  -3 -10  -5   11.39    1.34
  -3 -10  -5   16.26    1.59
   3  10   5   11.34    1.42
   3  10   6    3.51    0.85
   3  10   6    2.89    0.85
  -3 -10  -6    2.33    0.73
  -3 -10  -6    5.40    1.02
   3  10   7    2.23    0.63
  -3 -10  -7    2.37    0.71
   3  11   1    0.42    0.49
  -3 -11  -1    0.32    0.56
   3  11   2   -0.20    0.71
  -3 -11  -2    0.26    0.59
   3  11   3    0.57    0.71
   3  11   4    3.55    0.67
   3  11   4    8.06    0.98
  -3 -11  -4    4.86    0.79
   3  11   4    6.46    0.88
  -3 -11  -4    9.05    0.91
   4  -9  -5    0.32    0.61
   4  -9  -4    2.31    0.74
   4  -9  -4    1.92    0.63
   4  -9  -4    1.32    0.64
   4  -9  -3    6.23    0.98
  -4   9   3    4.30    0.71
   4  -9  -3    5.40    0.88
   4  -9  -3    5.74    0.92
  -4   9   2    1.58    0.61
   4  -9  -2    1.45    0.72
  -4   9   1    9.93    1.06
  -4   9   0    2.02    0.65
   4  -9   0    1.52    0.71
   4  -9   0    1.16    0.47
   4  -9   0    1.11    0.66
   4  -9   1   13.18    1.15
   4  -9   1    9.17    1.03
   4  -9   1    7.89    0.94
  -4   9  -1   14.55    1.14
  -4   8   7   10.66    1.09
   4  -8  -7   11.52    1.10
   4  -8  -7   12.54    1.19
   4  -8  -6    0.28    0.50
  -4   8   6    0.04    0.61
   4  -8  -6   -0.03    0.59
   4  -8  -5   10.02    1.20
   4  -8  -5   10.02    1.10
  -4   8   5   10.01    1.26
   4  -8  -5   10.61    1.22
   4  -8  -5   11.40    1.45
   4  -8  -4   17.09    1.55
  -4   8   4   21.20    1.79
   4  -8  -4   18.64    1.72
  -4   8   4   17.55    1.47
  -4   8   3   14.30    1.97
   4  -8  -3   13.81    1.58
   4  -8  -3   10.32    1.43
  -4   8   3   10.69    1.21
  -4   8   2   -0.12    0.73
  -4   8   2   -0.07    1.29
   4  -8  -2   -0.03    0.54
   4  -8  -2    0.37    0.78
   4  -8  -1    9.63    1.20
  -4   8   1   11.90    2.03
   4  -8  -1   11.66    1.30
  -4   8   1   11.49    1.34
   4  -8  -1   12.36    1.47
  -4   8   0   -0.25    0.75
   4  -8   0    0.47    0.67
  -4   8   0   -0.22    0.57
   4  -8   0   -0.04    0.87
  -4   8  -1    3.59    0.77
  -4   8  -1    2.50    0.90
   4  -8   1    1.97    0.86
   4  -8   1    1.65    0.87
  -4   8  -2    3.44    0.85
   4  -8   2    3.41    0.81
   4  -8   2    3.19    0.87
  -4   8  -2    3.95    0.79
   4  -8   2    2.15    0.79
  -4   8  -3   20.76    1.48
   4  -8   3   13.33    1.21
  -4   8  -3   18.98    1.39
  -4   8  -3   11.21    1.27
  -4   7   8   22.42    1.86
   4  -7  -8   21.33    1.69
  -4   7   8   23.74    1.74
   4  -7  -7    1.72    0.87
   4  -7  -7    0.35    0.53
   4  -7  -7    1.85    0.82
   4  -7  -6    8.54    1.20
   4  -7  -6    8.29    1.26
  -4   7   5    1.65    1.01
   4  -7  -5    0.71    0.85
   4  -7  -5    0.53    0.71
   4  -7  -5   -0.13    0.83
   4  -7  -5    0.76    1.07
  -4   7   4    0.06    0.98
  -4   7   4    0.44    0.64
  -4   7   4   -0.44    0.94
   4  -7  -4   -0.38    0.88
   4  -7  -4    0.56    0.80
   4  -7  -4   -0.54    1.11
  -4   7   3   -0.70    0.79
  -4   7   3   -0.16    1.47
  -4   7   3    0.71    1.06
   4  -7  -3    0.76    0.83
   4  -7  -3    0.48    1.03
   4  -7  -3   -0.12    1.08
  -4   7   2  243.12   12.51
   4  -7  -2  221.81   12.16
   4  -7  -2  262.09   12.66
  -4   7   2  236.93   12.32
  -4   7   1  106.12    6.17
   4  -7  -1   91.85    5.32
  -4   7   1   83.09    4.87
   4  -7  -1   83.63    5.08
   4  -7  -1   86.06    5.22
  -4   7   1  100.02    5.25
  -4   7   0    7.94    1.27
   4  -7   0    8.60    1.36
  -4   7   0    7.26    1.11
   4  -7   0    9.66    1.49
  -4   7  -1   13.32    2.07
  -4   7  -1   11.73    1.34
   4  -7   1   11.74    1.55
  -4   7  -1   12.41    1.33
  -4   7  -1   13.64    1.55
  -4   7  -2   72.23    5.05
  -4   7  -2   84.91    4.65
  -4   7  -2   78.85    4.60
  -4   7  -2   81.90    4.73
   4  -7   3   56.08    3.63
  -4   7  -3   69.15    3.79
   4  -7   3   52.66    3.57
  -4   7  -3   65.23    3.82
  -4   7  -3   69.33    3.88
  -4   7  -4    0.65    0.80
  -4   7  -4    1.97    0.82
   4  -7   4    0.65    0.60
  -4   7  -4   -0.04    0.72
  -4   7  -5    2.29    0.85
  -4   7  -5    4.93    0.84
   4  -7   5    2.06    0.71
  -4   7  -5    5.65    0.84
  -4   6   9    1.42    0.57
   4  -6  -9    0.57    0.55
   4  -6  -8    1.95    0.71
  -4   6   8    1.23    0.76
   4  -6  -8    2.28    0.85
   4  -6  -8    3.35    0.89
   4  -6  -7   39.32    2.67
   4  -6  -7   36.73    2.66
   4  -6  -7   41.22    2.76
   4  -6  -6   97.53    5.41
   4  -6  -6   91.91    5.31
   4  -6  -6   94.07    5.54
   4  -6  -6   85.41    5.18
   4  -6  -5   68.35    3.92
   4  -6  -5   57.66    3.62
   4  -6  -5   62.91    3.84
   4  -6  -5   57.80    3.74
   4  -6  -4   37.14    2.88
   4  -6  -4   30.14    2.40
   4  -6  -4   34.68    2.49
   4  -6  -4   30.96    2.54
  -4   6   4   34.11    2.97
  -4   6   4   28.85    2.18
  -4   6   3  100.73    5.89
   4  -6  -3   93.84    5.11
   4  -6  -3  105.87    5.62
   4  -6  -3   84.89    4.95
  -4   6   3   81.31    4.97
  -4   6   2  102.74    6.22
   4  -6  -2  102.60    5.90
  -4   6   2  109.55    6.34
   4  -6  -2  132.90    6.37
   4  -6  -2  120.90    6.42
  -4   6   2  132.41    7.01
  -4   6   2  105.74    6.06
   4  -6  -2  105.58    6.05
  -4   6   1 1314.35   58.71
  -4   6   1 1125.22   57.61
   4  -6  -1 1401.67   58.13
   4  -6  -1 1252.94   58.05
   4  -6  -1 1167.73   57.91
  -4   6   1 1202.25   57.87
  -4   6   1 1209.11   58.04
  -4   6   0    5.13    1.12
  -4   6   0    5.55    0.97
   4  -6   0    5.10    1.30
   4  -6   0    4.88    1.08
  -4   6  -1  120.12    6.76
  -4   6  -1  108.79    5.91
   4  -6   1  104.07    6.03
  -4   6  -1  103.39    5.81
  -4   6  -1  105.66    6.03
  -4   6  -2   10.29    1.84
   4  -6   2    8.30    1.45
  -4   6  -2   12.42    1.43
  -4   6  -2    9.73    1.35
  -4   6  -2   13.61    1.53
  -4   6  -3   28.33    2.30
  -4   6  -3   29.86    2.38
  -4   6  -3   30.35    2.41
  -4   6  -4   21.73    1.91
  -4   6  -4   22.73    2.06
  -4   6  -4   24.88    2.06
  -4   6  -5   14.45    1.47
  -4   6  -5   11.27    1.50
  -4   6  -5   12.87    1.44
   4  -6   6   15.87    1.42
  -4   6  -6   18.52    1.75
   4  -5  -9   20.57    1.78
   4  -5  -9   20.63    1.54
   4  -5  -8   26.61    2.02
   4  -5  -8   24.42    1.98
   4  -5  -7    0.33    0.77
   4  -5  -7    0.80    0.87
   4  -5  -7    0.74    0.79
   4  -5  -7    0.31    1.00
   4  -5  -7    1.65    1.03
   4  -5  -6  122.51    6.55
   4  -5  -6  120.47    6.49
   4  -5  -6  108.53    6.31
   4  -5  -6  113.35    6.56
   4  -5  -6  109.23    6.30
   4  -5  -5    1.94    1.01
   4  -5  -5    2.59    1.10
   4  -5  -5    1.70    1.06
   4  -5  -5    2.03    0.76
   4  -5  -4   13.75    1.58
   4  -5  -4   11.01    1.21
   4  -5  -4   13.73    1.56
   4  -5  -4   15.78    1.84
   4  -5  -4   12.09    1.63
  -4   5   4   14.27    1.92
  -4   5   3    0.59    0.62
  -4   5   3    1.02    1.03
   4  -5  -3    1.15    0.64
   4  -5  -3    0.09    0.72
   4  -5  -3    1.48    1.04
  -4   5   3    0.41    1.16
  -4   5   3   -0.10    0.82
   4  -5  -3    0.59    0.76
  -4   5   2   49.67    3.17
  -4   5   2   60.51    3.96
   4  -5  -2   49.74    3.13
   4  -5  -2   56.32    3.33
   4  -5  -2   63.66    3.55
   4  -5  -2   58.66    3.64
  -4   5   2   45.38    3.19
  -4   5   1    5.03    1.09
  -4   5   1    6.00    1.00
  -4   5   1    5.83    1.51
   4  -5  -1    5.32    1.11
   4  -5  -1    6.68    1.22
   4  -5  -1    5.62    1.17
   4  -5   0   52.94    3.54
  -4   5   0   63.58    4.19
  -4   5   0   56.34    3.35
   4  -5   0   55.05    3.52
  -4   5   0   57.41    3.47
   4  -5   1  243.70   12.48
  -4   5  -1  271.83   13.16
  -4   5  -1  247.81   12.38
   4  -5   1  230.76   12.33
  -4   5  -1  247.84   12.34
  -4   5  -1  259.45   12.53
  -4   5  -2    1.10    0.84
  -4   5  -2    0.19    0.87
  -4   5  -2    0.85    1.12
  -4   5  -2   -0.55    0.85
   4  -5   2    0.68    0.97
   4  -5   3   10.18    1.45
  -4   5  -3   11.85    1.79
  -4   5  -3   13.58    1.52
  -4   5  -3   12.88    1.60
  -4   5  -3   16.58    1.68
  -4   5  -4   67.46    4.28
  -4   5  -4   67.19    4.40
  -4   5  -4   75.29    4.43
  -4   5  -5   35.58    2.64
  -4   5  -5   32.26    2.59
  -4   5  -5   32.47    2.65
  -4   5  -6  155.02    8.07
  -4   5  -6  156.91    8.10
  -4   5  -6  140.94    7.84
  -4   5  -6  158.58    8.24
   4  -5   7    4.93    0.73
  -4   5  -7    7.39    1.14
   4  -4  -9   75.95    4.56
   4  -4  -9   83.26    4.68
   4  -4  -9   83.05    4.67
   4  -4  -9   83.65    4.74
   4  -4  -8    0.10    0.91
   4  -4  -8   -0.20    1.06
   4  -4  -8    0.45    0.68
   4  -4  -8    0.18    0.62
   4  -4  -7    4.01    1.16
   4  -4  -7    5.50    1.31
   4  -4  -7    4.37    1.07
   4  -4  -7    3.39    1.32
   4  -4  -7    5.79    1.14
   4  -4  -6   37.50    2.76
   4  -4  -6   36.66    2.79
   4  -4  -6   38.80    2.78
   4  -4  -6   34.07    2.72
   4  -4  -6   27.68    2.54
   4  -4  -5   24.66    2.16
   4  -4  -5   21.70    1.83
   4  -4  -5   28.98    2.23
   4  -4  -5   23.91    2.16
   4  -4  -5   28.65    2.35
   4  -4  -4    7.35    1.10
   4  -4  -4    7.61    1.18
   4  -4  -4    5.32    0.87
   4  -4  -4    5.17    1.15
   4  -4  -3    0.31    0.60
   4  -4  -3    0.25    0.78
  -4   4   3    0.47    1.00
   4  -4  -3    0.72    0.70
   4  -4  -3    0.29    0.81
   4  -4  -2  178.84    9.00
  -4   4   2  182.44    9.49
  -4   4   2  196.64    9.23
   4  -4  -2  170.71    8.82
   4  -4  -2  179.65    8.96
   4  -4  -2  194.14    9.09
   4  -4  -2  177.55    9.19
  -4   4   2  156.80    8.73
  -4   4   2  167.71    9.14
  -4   4   1  229.57   11.77
   4  -4  -1  215.04   11.50
  -4   4   1  232.94   11.95
  -4   4   1  250.95   11.71
   4  -4  -1  256.19   11.57
   4  -4  -1  223.17   11.60
  -4   4   1  221.97   11.34
  -4   4   1  219.58   11.50
  -4   4   0  399.81   19.27
  -4   4   0  384.02   19.44
  -4   4   0  410.45   19.83
  -4   4   0  404.79   19.17
   4  -4   0  403.43   19.37
   4  -4   0  379.84   19.38
  -4   4   0  386.88   19.17
  -4   4   0  422.55   19.31
  -4   4  -1   35.99    2.42
  -4   4  -1   42.29    2.48
   4  -4   1   32.87    2.49
   4  -4   1   39.20    2.51
  -4   4  -1   43.19    3.08
  -4   4  -1   39.73    2.46
  -4   4  -1   39.11    2.53
  -4   4  -2   17.34    1.96
  -4   4  -2   16.88    1.53
   4  -4   2   14.39    1.51
  -4   4  -2   17.97    1.57
  -4   4  -2   17.60    1.60
  -4   4  -3   -0.05    0.80
  -4   4  -3    0.67    0.82
  -4   4  -3    0.86    1.05
  -4   4  -3   -0.21    0.82
   4  -4   3    0.08    0.83
   4  -4   4   19.54    1.78
  -4   4  -4   26.08    2.11
  -4   4  -4   24.58    2.17
  -4   4  -4   25.06    2.14
  -4   4  -5  333.60   16.36
  -4   4  -5  332.80   16.35
  -4   4  -5  310.24   16.38
  -4   4  -6   76.46    4.68
  -4   4  -6   75.41    4.63
  -4   4  -6   76.51    4.72
  -4   4  -6   77.81    4.82
  -4   4  -7   24.99    2.15
  -4   4  -7   22.85    1.91
  -4   4  -8    0.68    0.71
  -4   4  -8    0.78    0.46
   4  -3 -10    0.12    0.57
   4  -3 -10   -0.56    0.65
   4  -3  -9    0.41    0.79
   4  -3  -9   -0.44    0.73
   4  -3  -9    0.17    0.78
   4  -3  -9   -0.35    0.92
   4  -3  -8   88.51    4.80
   4  -3  -8   77.24    4.76
   4  -3  -8   85.23    4.84
   4  -3  -7   29.14    2.46
   4  -3  -7   24.28    2.20
   4  -3  -7   24.53    2.12
   4  -3  -7   30.59    2.51
   4  -3  -6   43.13    3.11
   4  -3  -6   46.03    3.18
   4  -3  -6   44.91    3.15
   4  -3  -6   45.77    3.14
   4  -3  -5    6.38    1.20
   4  -3  -5    5.32    0.82
   4  -3  -5    7.42    1.21
   4  -3  -5    7.91    1.25
   4  -3  -5    5.62    1.13
   4  -3  -4   11.22    1.37
   4  -3  -4   10.92    1.20
   4  -3  -4   11.57    1.19
   4  -3  -4   11.14    1.31
   4  -3  -4   11.42    1.31
   4  -3  -4   13.97    1.51
   4  -3  -3  204.83   10.10
   4  -3  -3  196.38    9.95
   4  -3  -3  203.41    9.97
   4  -3  -3  202.91   10.12
  -4   3   2 1484.08   75.99
   4  -3  -2 1535.69   72.81
   4  -3  -2 1616.75   72.78
  -4   3   2 1495.60   73.12
   4  -3  -2 1461.99   72.61
  -4   3   2 1456.83   74.29
   4  -3  -2 1680.10   72.81
   4  -3  -2 1541.96   72.90
  -4   3   1   57.86    6.07
  -4   3   1   63.98    4.00
   4  -3  -1   66.73    3.72
  -4   3   1   60.63    4.74
  -4   3   1   73.45    3.82
   4  -3  -1   67.82    3.64
   4  -3  -1   64.02    3.75
  -4   3   1   56.46    3.42
  -4   3   0  164.55    7.77
  -4   3   0  154.42    8.87
  -4   3   0  151.33    7.86
  -4   3   0  150.88   10.85
  -4   3   0  151.56    8.05
  -4   3   0  169.59    7.82
  -4   3   0  140.34    7.37
   4  -3   0  149.28    7.60
   4  -3   0  147.79    7.68
  -4   3   0  139.92    7.49
  -4   3   0  146.30    7.49
  -4   3  -1    0.70    0.58
  -4   3  -1    1.49    1.05
  -4   3  -1    0.55    0.69
  -4   3  -1    1.00    0.59
   4  -3   1   -0.03    0.62
  -4   3  -1   -0.05    0.94
  -4   3  -1    0.61    0.51
  -4   3  -1    1.31    0.61
   4  -3   1    0.54    0.59
  -4   3  -2   12.58    1.23
  -4   3  -2   15.02    1.27
   4  -3   2   11.41    1.26
  -4   3  -2   13.09    1.68
  -4   3  -2   14.68    1.27
  -4   3  -2   12.71    1.83
  -4   3  -2   13.89    1.38
  -4   3  -2   15.32    1.38
  -4   3  -3    2.86    0.88
  -4   3  -3    1.90    0.78
  -4   3  -3    1.37    0.59
  -4   3  -3    1.39    1.09
  -4   3  -3    2.22    0.76
   4  -3   3    1.20    0.72
  -4   3  -4   31.62    2.24
   4  -3   4   35.97    2.38
  -4   3  -4   36.80    2.59
  -4   3  -4   33.40    2.82
  -4   3  -4   37.63    2.74
  -4   3  -4   35.50    2.58
  -4   3  -5  199.98    9.81
  -4   3  -5  206.06    9.81
  -4   3  -5  201.54    9.91
  -4   3  -6   21.11    2.03
  -4   3  -6   20.04    2.04
  -4   3  -7   19.64    2.03
  -4   3  -7   21.00    1.98
  -4   3  -7   21.55    2.14
  -4   3  -7   16.84    2.12
  -4   3  -8    1.60    1.12
  -4   3  -8    2.63    0.80
  -4   3  -9    0.95    0.64
  -4   3  -9    0.78    0.72
   4  -2 -10   11.37    1.18
   4  -2 -10    9.78    1.15
   4  -2  -9    9.54    1.33
   4  -2  -9   10.72    1.32
   4  -2  -8    4.28    1.32
   4  -2  -8    2.93    0.96
   4  -2  -8    3.97    1.08
   4  -2  -8    2.46    1.19
   4  -2  -7  663.04   29.39
   4  -2  -7  648.17   29.48
   4  -2  -7  688.84   29.55
   4  -2  -7  573.99   29.24
   4  -2  -7  525.85   28.93
   4  -2  -6   60.34    3.98
   4  -2  -6   62.24    3.98
   4  -2  -6   69.06    4.13
   4  -2  -6   66.45    4.06
   4  -2  -6   60.53    3.88
   4  -2  -5    1.65    0.91
   4  -2  -5    0.91    0.58
   4  -2  -5    1.04    0.91
   4  -2  -5    1.74    0.81
   4  -2  -5    0.59    0.86
   4  -2  -4  172.65    9.11
   4  -2  -4  165.33    8.94
   4  -2  -4  174.96    9.02
   4  -2  -4  201.99    9.26
   4  -2  -4  188.71    9.13
   4  -2  -4  179.12    9.19
   4  -2  -3 1652.08   80.20
   4  -2  -3 1658.02   80.19
   4  -2  -3 1819.95   80.20
   4  -2  -3 1630.61   80.22
   4  -2  -3 1720.75   80.13
  -4   2   3 1575.46   81.57
   4  -2  -3 1863.96   80.26
   4  -2  -3 1637.10   80.29
  -4   2   2 1532.63   80.50
   4  -2  -2 1662.22   78.20
   4  -2  -2 1543.78   78.03
   4  -2  -2 1690.75   78.23
   4  -2  -2 1737.32   78.31
   4  -2  -2 1788.30   78.20
  -4   2   2 1714.13   79.56
   4  -2  -2 1632.46   78.18
  -4   2   1  163.65   10.98
   4  -2  -1  177.14    8.73
  -4   2   1  164.11    8.98
  -4   2   1  184.07    8.81
   4  -2  -1  181.46    8.67
   4  -2  -1  163.38    8.76
  -4   2   0   61.74    3.75
  -4   2   0   50.86    5.44
  -4   2   0   59.91    5.63
  -4   2   0   66.30    3.57
   4  -2   0   64.87    3.41
   4  -2   0   60.13    3.52
  -4   2   0   59.83    3.75
  -4   2   0   58.71    4.31
  -4   2   0   61.46    3.68
  -4   2  -1    0.13    0.55
  -4   2  -1    0.34    0.74
  -4   2  -1    0.73    0.46
  -4   2  -1    0.88    0.98
  -4   2  -1    0.09    0.90
  -4   2  -1   -0.15    1.73
  -4   2  -1   -0.36    0.42
  -4   2  -1    0.55    0.68
   4  -2   1   -0.05    0.53
   4  -2   1   -0.17    0.54
  -4   2  -2    6.06    0.90
  -4   2  -2    5.36    0.80
   4  -2   2    4.44    0.78
  -4   2  -2    6.27    0.79
  -4   2  -2    6.94    0.93
  -4   2  -2    6.18    1.89
  -4   2  -2    6.01    2.52
  -4   2  -2    5.66    1.24
   4  -2   2    5.11    0.79
  -4   2  -2    7.61    1.03
  -4   2  -3  890.27   39.97
  -4   2  -3  794.48   43.36
  -4   2  -3  847.78   39.91
  -4   2  -3  863.94   39.98
   4  -2   3  822.76   39.94
  -4   2  -3  869.59   40.08
  -4   2  -3  917.85   39.99
  -4   2  -4   56.35    3.24
  -4   2  -4   46.58    2.90
  -4   2  -4   51.73    3.08
   4  -2   4   46.32    2.97
  -4   2  -4   49.25    3.18
  -4   2  -4   54.73    3.32
  -4   2  -5   27.77    2.31
  -4   2  -5   27.17    2.28
  -4   2  -5   27.91    2.07
  -4   2  -5   31.80    2.50
  -4   2  -6    1.86    1.16
  -4   2  -6    1.12    0.78
  -4   2  -6    0.56    1.17
  -4   2  -7   11.06    1.91
  -4   2  -7   10.98    1.27
  -4   2  -7   12.10    1.69
  -4   2  -7   11.42    1.63
  -4   2  -7   13.77    1.84
  -4   2  -8    3.74    1.05
  -4   2  -8    2.46    0.69
  -4   2  -9    5.33    1.18
  -4   2  -9    8.28    1.36
  -4   2  -9    7.52    1.03
   4  -1 -10   28.14    2.08
   4  -1 -10   30.21    2.18
   4  -1  -9    7.19    1.05
   4  -1  -9   10.41    1.39
   4  -1  -8   21.76    1.81
   4  -1  -8   15.96    1.75
   4  -1  -8   20.31    2.06
   4  -1  -7   17.87    1.80
   4  -1  -7   21.20    2.12
   4  -1  -7   15.85    1.88
   4  -1  -6  682.72   33.38
   4  -1  -6  745.27   33.56
   4  -1  -6  800.37   33.64
   4  -1  -6  662.50   33.42
   4  -1  -6  635.43   33.18
   4  -1  -5   29.74    2.26
   4  -1  -5   28.15    2.13
   4  -1  -5   33.04    2.34
   4  -1  -5   34.11    2.40
   4  -1  -5   31.21    2.37
   4  -1  -5   32.21    2.26
   4  -1  -4  182.87    9.17
   4  -1  -4  172.67    8.95
   4  -1  -4  181.68    9.11
   4  -1  -4  175.27    9.16
  -4   1   4  178.82   10.42
   4  -1  -4  187.98    9.16
   4  -1  -4  185.38    9.22
  -4   1   3  119.63    8.63
   4  -1  -3  140.67    7.17
   4  -1  -3  140.82    7.17
   4  -1  -3  152.00    7.29
   4  -1  -3  134.25    7.27
  -4   1   3  133.11    8.31
   4  -1  -3  157.65    7.31
   4  -1  -3  140.16    7.31
   4  -1  -3  131.82    7.91
   4  -1  -2  160.97    8.45
  -4   1   2  166.41   10.22
   4  -1  -2  163.69    8.46
   4  -1  -2  177.15    8.47
   4  -1  -2  162.54    8.33
   4  -1  -2  175.85    9.40
   4  -1  -2  161.55    8.47
   4  -1  -2  185.54    8.47
  -4   1   2  178.16    9.61
  -4   1   1    1.55    0.58
   4  -1  -1    1.29    0.60
  -4   1   1   -0.63    1.99
   4  -1  -1    1.83    0.61
  -4   1   1    1.21    1.13
  -4   1   1    0.36    1.59
   4  -1  -1    0.82    0.65
   4  -1  -1    0.23    0.95
  -4   1   0  103.65    5.70
  -4   1   0  114.79    6.46
  -4   1   0   96.79    7.44
  -4   1   0  107.21    7.34
   4  -1   0  106.87    5.45
  -4   1   0  104.96    5.45
   4  -1   0  101.89    5.33
   4  -1   0  102.87    5.49
   4  -1   0  107.13    5.50
   4  -1   0  114.57    6.61
  -4   1   0  108.46    5.74
  -4   1  -1   29.71    2.05
   4  -1   1   27.04    1.84
  -4   1  -1   29.07    2.05
   4  -1   1   27.50    1.85
  -4   1  -1   30.13    3.40
   4  -1   1   28.27    1.87
   4  -1   1   33.43    2.83
  -4   1  -1   22.92    1.85
  -4   1  -2  159.48    7.54
  -4   1  -2  154.75    7.49
  -4   1  -2  152.74    8.11
  -4   1  -2  146.01    8.84
  -4   1  -2  147.85    9.52
   4  -1   2  142.01    7.34
   4  -1   2  139.53    8.50
  -4   1  -2  140.51    7.20
   4  -1   2  140.39    7.31
  -4   1  -2  150.19    7.46
  -4   1  -2  136.93    7.19
  -4   1  -3    3.72    0.89
  -4   1  -3    2.33    1.23
  -4   1  -3    3.55    0.78
  -4   1  -3    2.03    0.87
  -4   1  -3    3.91    0.74
   4  -1   3    4.18    0.72
  -4   1  -3    3.67    0.81
  -4   1  -3    4.10    0.76
  -4   1  -3    1.87    2.01
  -4   1  -4  137.95    7.17
  -4   1  -4  138.16    7.11
  -4   1  -4  140.23    7.22
  -4   1  -4  134.17    7.20
  -4   1  -5    0.68    0.85
  -4   1  -5   -0.07    0.59
  -4   1  -5    0.74    0.85
  -4   1  -5    0.04    0.69
  -4   1  -6    0.83    1.20
  -4   1  -6   -0.78    1.16
  -4   1  -6   -0.20    0.62
  -4   1  -6    0.95    1.10
  -4   1  -6    0.41    0.79
  -4   1  -7    8.31    1.72
  -4   1  -7    8.83    1.64
  -4   1  -7    7.20    1.67
  -4   1  -7    8.92    1.29
  -4   1  -8   16.17    1.60
  -4   1  -9    4.02    1.32
  -4   1  -9    5.68    1.12
  -4   1  -9    4.97    0.83
  -4   1 -10    2.27    0.64
  -4   1 -10    1.58    0.80
   4   0 -10   -0.31    0.59
   4   0 -10    0.62    0.55
   4   0 -10    0.03    0.59
   4   0  -9    1.50    0.78
   4   0  -9    0.28    0.69
   4   0  -9    0.56    0.90
   4   0  -8   26.61    2.29
   4   0  -8   29.37    2.47
   4   0  -8   25.86    2.24
   4   0  -7   15.30    1.50
   4   0  -7   20.81    1.97
   4   0  -7   11.10    1.33
   4   0  -7   18.01    1.86
   4   0  -7   16.61    1.92
   4   0  -7   13.94    1.72
   4   0  -6   28.04    2.13
   4   0  -6   27.58    2.32
   4   0  -6   32.11    2.48
   4   0  -6   28.18    2.31
   4   0  -6   24.93    2.08
   4   0  -5    0.08    0.68
   4   0  -5   -0.20    0.67
   4   0  -5    0.70    0.91
   4   0  -5    1.05    0.61
   4   0  -5   -0.04    0.77
   4   0  -4  504.01   24.72
   4   0  -4  542.95   24.83
  -4   0   4  501.02   25.93
   4   0  -4  506.17   24.74
   4   0  -4  518.51   24.78
   4   0  -3  294.06   15.32
   4   0  -3  309.43   16.10
  -4   0   3  305.09   16.81
   4   0  -3  340.93   15.45
   4   0  -3  327.80   15.35
   4   0  -3  299.62   15.27
   4   0  -3  345.14   15.44
   4   0  -3  298.83   15.39
  -4   0   3  338.89   16.59
   4   0  -2    4.10    0.70
  -4   0   2    3.73    1.98
   4   0  -2    3.98    0.67
   4   0  -2    3.13    0.74
   4   0  -2    2.92    0.65
  -4   0   2    3.20    1.49
   4   0  -2    4.02    0.79
   4   0  -2    3.10    0.71
   4   0  -2    4.02    1.05
  -4   0   1  258.09   13.82
   4   0  -1  273.72   13.64
  -4   0   1  283.69   15.70
   4   0  -1  287.62   13.65
  -4   0   1  281.58   15.17
   4   0  -1  285.75   14.50
   4   0  -1  295.92   13.59
  -4   0   0  928.10   44.43
   4   0   0  960.87   44.23
  -4   0   0  931.52   45.80
   4   0   0  923.08   44.26
   4   0   0  941.40   45.18
   4   0   0  937.12   44.30
  -4   0  -1 1538.15   72.38
   4   0   1 1509.27   71.58
   4   0   1 1448.28   70.59
   4   0   1 1505.09   70.62
   4   0   1 1539.85   70.53
  -4   0  -2 1057.59   46.66
  -4   0  -2 1029.22   48.46
   4   0   2  962.25   46.40
   4   0   2  926.49   46.46
   4   0   2  989.73   47.50
  -4   0  -2 1087.64   48.18
  -4   0  -3  262.15   12.84
  -4   0  -3  266.11   13.03
  -4   0  -3  286.18   13.03
   4   0   3  254.85   12.79
  -4   0  -3  274.14   14.97
   4   0   3  262.79   13.80
  -4   0  -3  281.97   14.30
  -4   0  -3  248.94   12.89
  -4   0  -3  274.12   13.10
   4   0   3  258.99   12.86
  -4   0  -4   13.90    1.33
  -4   0  -4   15.99    1.41
  -4   0  -4   17.41    1.49
   4   0   4   11.60    1.11
  -4   0  -4   12.42    1.35
  -4   0  -4   14.77    1.85
  -4   0  -5  148.85    7.99
  -4   0  -5  151.78    7.92
  -4   0  -5  155.75    8.02
  -4   0  -5  154.54    8.04
  -4   0  -6   98.47    5.56
  -4   0  -6   93.62    5.27
  -4   0  -6   88.17    5.59
  -4   0  -6  108.39    5.73
  -4   0  -6   87.80    5.65
  -4   0  -7    1.35    0.75
  -4   0  -7    0.97    1.23
  -4   0  -7    0.58    1.32
  -4   0  -7    1.18    1.09
  -4   0  -7    1.96    1.00
  -4   0  -8   16.79    1.51
  -4   0  -8   20.79    1.92
  -4   0  -8   17.88    2.23
  -4   0  -8   22.25    2.16
  -4   0  -9    3.72    1.55
  -4   0  -9    5.61    1.05
  -4   0 -10    1.08    0.94
  -4   0 -10    0.68    0.66
  -4   0 -10    0.76    0.92
   4   1  -9    4.43    1.05
   4   1  -9    2.92    0.82
   4   1  -9    4.19    1.09
   4   1  -9    5.97    1.09
   4   1  -8   36.96    2.76
   4   1  -7    1.09    0.77
   4   1  -7    2.04    1.11
   4   1  -7    0.61    0.89
   4   1  -6   27.26    2.22
   4   1  -6   28.93    2.39
   4   1  -6   28.03    2.36
   4   1  -6   26.04    2.35
   4   1  -6   26.49    2.16
   4   1  -5  385.38   20.54
   4   1  -5  429.70   20.75
   4   1  -5  454.32   20.93
   4   1  -5  460.68   20.91
   4   1  -4    3.79    0.72
   4   1  -4    5.04    0.93
   4   1  -4    4.23    0.89
   4   1  -4    3.41    0.94
   4   1  -4    3.40    0.91
   4   1  -4    3.61    0.72
   4   1  -4    3.72    0.81
  -4  -1   3   37.11    3.15
   4   1  -3   39.20    2.49
  -4  -1   3   33.82    3.76
   4   1  -3   34.23    2.39
   4   1  -3   39.34    2.43
   4   1  -3   36.27    3.03
  -4  -1   3   33.16    3.29
   4   1  -3   39.90    2.43
   4   1  -3   38.54    2.34
   4   1  -3   43.31    2.51
   4   1  -3   36.80    2.44
  -4  -1   2   30.32    3.40
   4   1  -2   30.15    1.89
   4   1  -2   27.21    1.83
   4   1  -2   26.33    1.84
   4   1  -2   31.54    2.56
   4   1  -2   27.71    1.87
   4   1  -2   26.36    1.88
   4   1  -2   27.54    1.88
  -4  -1   2   26.45    2.84
  -4  -1   1   99.68    5.71
   4   1  -1  110.43    5.59
  -4  -1   1  105.60    6.77
   4   1  -1  117.82    5.61
   4   1  -1  103.31    6.28
   4   1  -1  105.24    5.48
   4   1  -1  104.59    5.61
   4   1  -1  111.79    5.57
  -4  -1   1  104.79    7.11
  -4  -1   0 1259.29   58.52
   4   1   0 1252.21   58.31
   4   1   0 1240.10   59.21
  -4  -1   0 1262.48   59.69
   4   1   0 1150.02   58.39
  -4  -1   0 1316.11   58.58
  -4  -1  -1  357.81   16.39
  -4  -1  -1  358.06   16.38
   4   1   1  328.21   16.23
   4   1   1  330.72   17.03
   4   1   1  333.96   16.29
   4   1   1  319.24   16.26
  -4  -1  -2    1.75    1.44
  -4  -1  -2    1.80    1.50
  -4  -1  -2    3.83    0.89
  -4  -1  -2    2.86    0.83
   4   1   2    3.41    2.51
   4   1   2    4.54    0.76
   4   1   2    5.35    0.84
   4   1   2    1.61    0.97
  -4  -1  -3   27.45    1.84
  -4  -1  -3   33.07    2.10
   4   1   3   31.34    4.10
  -4  -1  -3   25.11    3.00
   4   1   3   26.19    1.86
   4   1   3   29.81    2.50
   4   1   3   27.19    1.91
  -4  -1  -3   26.73    1.96
  -4  -1  -4    2.40    0.82
  -4  -1  -4    1.59    0.73
   4   1   4    1.76    1.88
  -4  -1  -4    1.39    1.08
  -4  -1  -4    2.99    0.60
  -4  -1  -4    1.82    0.78
  -4  -1  -4    0.60    1.22
  -4  -1  -4    2.98    0.89
   4   1   4    2.10    0.87
  -4  -1  -5  149.73    7.74
  -4  -1  -5  151.42    7.73
  -4  -1  -5  153.36    7.90
  -4  -1  -5  137.33    7.42
  -4  -1  -6    3.45    1.05
  -4  -1  -6    0.10    1.21
  -4  -1  -6    2.20    1.12
  -4  -1  -6    0.34    1.35
  -4  -1  -7   83.23    5.12
  -4  -1  -7   77.29    4.73
  -4  -1  -7   76.81    5.19
  -4  -1  -7   90.51    5.09
  -4  -1  -8   10.62    1.36
  -4  -1  -8   14.49    1.69
  -4  -1  -8   11.12    1.94
  -4  -1  -8   13.95    1.76
   4   1   8    8.73    1.38
  -4  -1  -9    0.65    1.08
  -4  -1  -9    0.48    0.59
  -4  -1  -9    0.41    1.36
  -4  -1  -9    0.91    0.91
  -4  -1 -10    3.94    1.00
  -4  -1 -10    4.66    0.90
   4   2  -9   38.74    2.60
   4   2  -9   40.16    2.65
   4   2  -9   31.85    2.33
   4   2  -9   41.89    2.63
   4   2  -8  246.04   11.24
   4   2  -8  243.22   11.26
   4   2  -8  236.43   11.33
   4   2  -8  220.19   11.02
   4   2  -7  370.51   19.35
   4   2  -7  373.78   19.31
   4   2  -7  421.41   19.68
   4   2  -7  434.60   19.75
   4   2  -6    6.74    1.11
   4   2  -6    6.22    1.22
   4   2  -6    8.09    1.47
   4   2  -6    7.39    1.49
   4   2  -5   57.69    3.60
   4   2  -5   52.44    3.38
   4   2  -5   56.50    3.66
   4   2  -4    6.54    0.95
   4   2  -4    6.48    0.82
   4   2  -4    7.18    1.14
   4   2  -4    6.83    1.10
   4   2  -4    7.47    1.13
   4   2  -4    5.33    0.80
   4   2  -4    7.33    1.14
   4   2  -3 1175.03   53.57
  -4  -2   3  905.03   49.15
   4   2  -3 1091.46   49.18
   4   2  -3 1016.29   49.12
  -4  -2   3  959.73   50.59
   4   2  -3 1101.65   49.26
   4   2  -3 1160.90   49.35
   4   2  -3 1133.75   49.30
   4   2  -3 1017.66   49.13
   4   2  -3  997.00   49.06
  -4  -2   3  975.11   50.47
   4   2  -2  661.74   31.99
  -4  -2   2  520.84   27.71
  -4  -2   2  558.08   29.28
   4   2  -2  607.50   27.83
   4   2  -2  582.16   28.77
   4   2  -2  606.16   27.74
   4   2  -2  559.47   27.72
  -4  -2   2  586.68   28.95
   4   2  -2  586.56   27.74
   4   2  -2  604.39   27.74
   4   2  -2  575.34   27.67
   4   2  -2  597.01   27.81
  -4  -2   1    0.32    1.45
  -4  -2   1    1.21    0.75
   4   2  -1    0.56    2.32
   4   2  -1    1.82    0.65
   4   2  -1    1.54    0.68
   4   2  -1    1.74    0.72
   4   2  -1    1.11    0.57
   4   2  -1    0.99    0.62
   4   2  -1    0.70    0.60
  -4  -2   1    1.33    1.06
   4   2  -1    0.23    0.84
   4   2  -1    1.95    0.63
  -4  -2   0  690.74   33.90
   4   2   0  695.71   33.81
  -4  -2   0  736.99   35.53
   4   2   0  760.31   34.86
   4   2   0  731.77   33.93
   4   2   0  715.64   33.88
  -4  -2   0  734.99   35.02
  -4  -2  -1   59.01    2.98
  -4  -2  -1   49.77    2.88
   4   2   1   43.25    2.80
   4   2   1   40.06    2.81
   4   2   1   51.71    3.59
  -4  -2  -1   58.63    4.37
  -4  -2  -2 1084.90   48.86
  -4  -2  -2 1104.67   48.86
   4   2   2 1074.03   51.25
  -4  -2  -2 1070.16   50.30
  -4  -2  -2  942.88   48.81
   4   2   2 1014.91   48.80
   4   2   2 1084.63   49.66
   4   2   2 1002.98   48.83
   4   2   2 1022.67   48.85
  -4  -2  -3  314.01   15.77
  -4  -2  -3  367.64   15.91
  -4  -2  -3  357.98   15.91
   4   2   3  361.07   18.47
   4   2   3  319.29   15.81
  -4  -2  -3  292.61   15.90
   4   2   3  322.24   16.54
  -4  -2  -3  286.36   16.91
  -4  -2  -3  346.79   17.32
   4   2   3  311.39   15.88
  -4  -2  -4   14.57    1.46
  -4  -2  -4   15.27    1.45
  -4  -2  -4   16.31    1.62
   4   2   4   15.19    2.76
   4   2   4   16.14    1.35
  -4  -2  -4   18.15    1.42
   4   2   4   15.31    1.75
  -4  -2  -4   14.30    2.18
  -4  -2  -4   10.72    2.05
  -4  -2  -5   13.16    1.52
  -4  -2  -5   14.64    1.45
  -4  -2  -5   12.87    1.28
  -4  -2  -5   10.87    1.57
  -4  -2  -5   15.18    1.42
  -4  -2  -5   11.26    1.30
  -4  -2  -6   76.78    4.41
  -4  -2  -6   71.85    4.54
  -4  -2  -6   77.88    4.43
  -4  -2  -6   76.92    4.42
  -4  -2  -6   69.11    4.21
  -4  -2  -6   64.61    4.58
  -4  -2  -7  139.39    8.13
  -4  -2  -7  150.70    7.92
  -4  -2  -7  143.86    7.97
  -4  -2  -7  135.93    8.24
  -4  -2  -7  159.68    8.08
  -4  -2  -8   23.65    2.60
  -4  -2  -8   23.34    2.09
  -4  -2  -8   23.45    2.28
  -4  -2  -8   24.40    2.29
   4   2   8   18.65    1.91
  -4  -2  -9    0.86    0.80
  -4  -2  -9   -0.36    1.53
  -4  -2  -9   -0.11    1.02
  -4  -2 -10    7.25    0.86
  -4  -2 -10    8.91    1.26
   4   3  -9    0.98    0.64
   4   3  -9    0.89    0.66
   4   3  -8   92.69    5.19
   4   3  -8   94.35    5.11
   4   3  -8   95.94    5.26
   4   3  -8   92.49    5.08
   4   3  -7   33.69    2.72
   4   3  -7   31.50    2.52
   4   3  -7   35.09    2.90
   4   3  -7   33.82    2.90
   4   3  -7   35.34    2.80
   4   3  -6   23.28    2.17
   4   3  -6   23.68    2.23
   4   3  -5    8.01    1.10
   4   3  -5   11.02    1.54
   4   3  -5   11.51    1.53
   4   3  -5   11.72    1.70
   4   3  -5   12.31    1.69
   4   3  -5   10.06    1.12
   4   3  -4    3.84    0.82
   4   3  -4    3.39    0.73
   4   3  -4    3.66    1.09
   4   3  -4    4.67    1.11
   4   3  -4    2.51    1.06
   4   3  -3  142.69    7.30
   4   3  -3  141.08    7.42
   4   3  -3  146.26    7.52
   4   3  -3  144.44    7.41
   4   3  -3  139.49    7.30
   4   3  -2   -0.85    2.26
   4   3  -2    2.12    0.82
   4   3  -2    1.42    0.86
   4   3  -2    0.53    0.76
   4   3  -2    1.42    0.75
   4   3  -2    0.40    0.72
   4   3  -2    0.98    0.67
   4   3  -2    0.57    0.80
  -4  -3   2   -0.10    0.99
   4   3  -2    0.97    0.72
  -4  -3   1    9.96    2.00
   4   3  -1   14.15    1.33
   4   3  -1   14.93    1.34
   4   3  -1   14.86    1.37
   4   3  -1   15.03    1.39
   4   3  -1   14.22    1.29
   4   3  -1   13.34    1.21
   4   3  -1   14.10    3.21
   4   3  -1   13.21    1.28
   4   3  -1   13.10    1.28
  -4  -3   1   12.03    1.85
  -4  -3   1   11.75    1.26
  -4  -3   0  403.78   19.34
   4   3   0  409.29   22.40
   4   3   0  406.47   19.46
  -4  -3   0  409.25   20.52
   4   3   0  385.96   19.35
  -4  -3   0  411.17   20.97
   4   3   0  419.69   20.59
   4   3   0  404.62   19.48
   4   3   0  409.77   19.49
  -4  -3  -1    6.95    0.88
   4   3   1    5.73    2.36
   4   3   1    6.93    0.96
   4   3   1    5.38    0.75
  -4  -3  -1    3.98    1.60
   4   3   1    4.41    0.91
   4   3   1    4.59    1.26
  -4  -3  -1    5.03    0.83
  -4  -3  -2  307.24   14.70
  -4  -3  -2  302.03   14.74
   4   3   2  277.82   16.94
   4   3   2  297.09   14.81
   4   3   2  291.54   15.68
  -4  -3  -2  299.06   15.73
   4   3   2  315.36   14.84
  -4  -3  -3    0.51    0.73
  -4  -3  -3    0.23    0.45
   4   3   3    2.11    1.95
  -4  -3  -3    0.77    0.64
  -4  -3  -3    0.17    0.94
   4   3   3    0.67    0.65
  -4  -3  -3    0.54    0.94
   4   3   3   -0.04    0.69
  -4  -3  -3    0.24    0.74
   4   3   3    0.70    0.81
  -4  -3  -4  123.00    6.66
  -4  -3  -4  128.42    6.57
  -4  -3  -4  134.31    6.55
  -4  -3  -4  105.53    7.54
   4   3   4  126.09    8.89
   4   3   4  127.07    6.50
  -4  -3  -4  109.44    6.79
  -4  -3  -4  120.78    6.38
  -4  -3  -4  127.93    6.76
   4   3   4  124.71    6.63
  -4  -3  -5   18.44    1.87
  -4  -3  -5   18.44    1.68
  -4  -3  -5   19.17    1.64
  -4  -3  -5   16.19    1.97
  -4  -3  -5   17.69    1.53
  -4  -3  -5   16.92    1.63
   4   3   5   15.03    3.10
  -4  -3  -5   17.50    1.70
   4   3   5   16.36    1.63
  -4  -3  -6    1.62    0.82
  -4  -3  -6    0.69    0.71
  -4  -3  -6    0.66    0.75
  -4  -3  -6    0.59    1.15
  -4  -3  -6    2.02    1.44
   4   3   6    1.21    0.80
  -4  -3  -7   12.11    1.67
  -4  -3  -7   12.37    2.01
  -4  -3  -7   12.66    1.60
  -4  -3  -7   12.49    1.58
  -4  -3  -7    7.37    1.51
   4   3   7   12.11    1.47
  -4  -3  -8    1.70    1.05
  -4  -3  -8    2.92    1.68
  -4  -3  -8    1.14    1.09
  -4  -3  -8    2.79    1.21
   4   3   8    1.96    0.82
  -4  -3  -9   -0.83    0.91
  -4  -3  -9    0.22    0.98
  -4  -3  -9   -0.77    1.04
  -4  -3 -10   14.25    1.33
  -4  -3 -10   16.93    1.57
  -4  -3 -10   14.57    1.56
   4   4  -8    3.10    0.67
   4   4  -8    3.97    0.98
   4   4  -8    3.64    0.90
   4   4  -8    3.28    0.97
   4   4  -7    4.97    1.06
   4   4  -7    6.21    1.35
   4   4  -7    4.16    1.21
   4   4  -7    4.60    1.28
   4   4  -7    3.55    1.00
   4   4  -6   11.34    1.53
   4   4  -6    9.88    1.50
   4   4  -6   10.04    1.09
   4   4  -5   17.57    2.01
   4   4  -5   17.31    2.07
   4   4  -5   14.42    1.49
   4   4  -5   14.25    1.82
   4   4  -4  109.87    5.98
   4   4  -4  101.92    5.99
   4   4  -4  102.66    5.91
   4   4  -4  103.29    6.06
   4   4  -4   97.64    5.69
   4   4  -3    6.93    1.23
   4   4  -3    5.86    1.19
   4   4  -3    7.93    1.30
   4   4  -3    5.69    1.14
   4   4  -3    7.13    1.29
   4   4  -3    5.73    1.06
   4   4  -2    6.62    2.58
   4   4  -2   10.41    1.25
   4   4  -2    9.06    1.19
   4   4  -2    8.83    1.28
   4   4  -2    9.06    1.19
   4   4  -2    7.83    1.25
   4   4  -2    9.80    1.21
   4   4  -1  409.60   23.99
   4   4  -1  434.68   20.99
   4   4  -1  428.73   20.80
  -4  -4   1  384.31   22.03
   4   4  -1  444.74   21.12
   4   4  -1  440.96   21.13
   4   4  -1  440.21   21.18
   4   4  -1  437.68   20.93
   4   4  -1  442.15   21.05
   4   4   0    7.74    1.08
   4   4   0    3.78    2.56
   4   4   0    5.36    1.22
   4   4   0    5.66    0.96
  -4  -4   0    5.18    1.51
   4   4   0    6.01    1.23
  -4  -4  -1   45.37    2.63
   4   4   1   42.99    2.88
   4   4   1   40.57    2.61
   4   4   1   46.96    2.93
   4   4   1   51.88    2.99
   4   4   2    0.37    0.59
  -4  -4  -2    0.29    0.55
   4   4   2    0.24    0.73
  -4  -4  -2    0.02    0.52
  -4  -4  -2    0.80    0.78
   4   4   2   -0.99    1.79
  -4  -4  -2    0.36    0.91
   4   4   2    0.04    0.72
  -4  -4  -3   71.98    3.88
  -4  -4  -3   63.63    3.71
   4   4   3   72.08    4.05
   4   4   3   61.42    5.93
  -4  -4  -3   58.26    4.70
  -4  -4  -3   60.65    3.74
   4   4   3   78.01    4.06
  -4  -4  -4  125.63    6.42
  -4  -4  -4  122.57    6.30
   4   4   4  128.76    6.47
  -4  -4  -4  109.12    6.10
  -4  -4  -4  110.68    6.13
  -4  -4  -4  133.17    6.73
   4   4   4  126.38    6.50
  -4  -4  -5   13.30    1.54
  -4  -4  -5   14.10    1.37
  -4  -4  -5   11.44    1.23
  -4  -4  -5   12.57    1.54
   4   4   5   11.43    1.40
  -4  -4  -6   29.64    2.33
  -4  -4  -6   26.86    2.17
  -4  -4  -6   26.87    2.10
  -4  -4  -6   27.72    2.31
  -4  -4  -6   24.21    2.22
   4   4   6   24.66    2.11
  -4  -4  -7    1.48    1.11
  -4  -4  -7    0.92    0.88
  -4  -4  -7    2.05    1.04
  -4  -4  -7    1.03    0.92
  -4  -4  -7    1.57    0.79
   4   4   7    0.51    0.76
  -4  -4  -8    5.97    1.27
  -4  -4  -8    6.36    1.34
  -4  -4  -9   14.18    1.58
  -4  -4  -9   10.29    1.48
  -4  -4  -9   12.29    1.52
   4   4  10   -0.29    0.90
  -4  -4 -10    0.76    0.66
  -4  -4 -10    1.01    0.75
  -4  -4 -10    0.07    0.70
   4   5  -8   14.78    1.30
   4   5  -7    3.26    0.88
   4   5  -7    2.40    1.01
   4   5  -7    2.09    0.95
   4   5  -7    2.15    1.03
   4   5  -6    0.57    0.60
   4   5  -6    0.64    0.99
   4   5  -6    0.06    1.11
   4   5  -6    1.00    1.25
   4   5  -5    3.92    0.98
   4   5  -5    4.15    1.23
   4   5  -5    5.41    1.55
   4   5  -4    7.13    1.25
   4   5  -4    5.70    1.28
   4   5  -4    6.79    1.39
   4   5  -4    7.82    1.64
   4   5  -4    6.93    1.50
   4   5  -4    8.09    1.67
   4   5  -3   48.75    3.23
   4   5  -3   47.82    3.37
   4   5  -3   46.68    3.51
   4   5  -3   44.24    3.31
   4   5  -3   48.34    3.58
   4   5  -3   50.94    3.41
   4   5  -3   46.79    3.30
   4   5  -2   43.21    2.90
   4   5  -2   37.81    2.53
   4   5  -2   41.39    2.91
   4   5  -2   39.15    3.01
   4   5  -2   38.04    3.04
   4   5  -2   41.74    2.87
   4   5  -2   42.77    2.92
   4   5  -1    1.16    1.02
   4   5  -1    0.99    0.77
   4   5  -1    0.93    1.07
   4   5  -1    1.82    0.90
  -4  -5   1    1.60    1.02
   4   5  -1    0.82    0.96
   4   5  -1    1.95    1.23
   4   5   0   94.63    5.37
   4   5   0   92.69    5.36
   4   5   0  107.54    5.80
  -4  -5   0   95.22    5.62
   4   5   0  101.91    5.39
   4   5   0  110.59    5.81
   4   5   0   97.93    5.59
   4   5   1  386.02   18.46
   4   5   1  330.04   18.00
   4   5   1  401.95   18.53
   4   5   1  384.22   18.49
  -4  -5  -1  390.49   18.55
   4   5   1  374.54   18.33
   4   5   1  380.94   18.09
   4   5   2    1.03    0.69
  -4  -5  -2    1.20    0.57
   4   5   2    0.67    0.83
  -4  -5  -2    0.98    0.99
  -4  -5  -2    1.18    1.04
   4   5   2    1.55    0.77
   4   5   3    1.14    0.86
  -4  -5  -3    0.64    0.62
  -4  -5  -3    1.35    0.82
  -4  -5  -3    1.11    1.02
   4   5   3    1.14    0.79
   4   5   4    7.53    1.32
  -4  -5  -4    7.70    0.97
  -4  -5  -4    8.65    1.16
   4   5   4    8.34    1.26
  -4  -5  -4    8.25    1.10
  -4  -5  -4    7.78    1.51
   4   5   4    9.35    1.28
  -4  -5  -5   84.88    4.60
  -4  -5  -5   80.02    4.39
  -4  -5  -5   72.68    4.27
  -4  -5  -5   86.85    4.92
   4   5   5   79.84    4.58
  -4  -5  -5   67.49    4.23
   4   5   5   81.16    4.57
  -4  -5  -6    8.17    1.40
  -4  -5  -6    7.50    1.11
  -4  -5  -6    9.29    1.20
  -4  -5  -6    8.40    1.46
   4   5   6    6.06    1.12
  -4  -5  -7   46.97    3.14
  -4  -5  -7   48.21    2.99
  -4  -5  -7   34.90    3.01
  -4  -5  -7   39.22    2.83
  -4  -5  -7   33.71    2.84
  -4  -5  -8   22.51    2.05
  -4  -5  -8   18.84    1.83
  -4  -5  -8   18.40    1.78
   4   5   9    9.15    1.61
  -4  -5  -9   13.38    1.39
  -4  -5  -9   10.86    1.38
   4   5  10   -0.04    0.88
  -4  -5 -10    0.14    0.72
   4   6  -7    2.11    0.69
   4   6  -7    0.90    0.70
   4   6  -7    3.20    0.84
   4   6  -7    1.95    0.80
   4   6  -6    7.03    0.88
   4   6  -6    8.20    1.24
   4   6  -6    7.90    1.43
   4   6  -5    8.65    1.19
   4   6  -5    6.82    1.52
   4   6  -4    2.11    0.98
   4   6  -4    1.86    1.19
   4   6  -4    1.25    1.21
   4   6  -3   27.28    2.27
   4   6  -3   23.20    1.86
   4   6  -3   26.22    2.69
   4   6  -3   25.96    2.62
   4   6  -3   24.11    2.46
   4   6  -3   26.57    2.36
   4   6  -3   27.79    2.39
   4   6  -2    4.91    0.95
   4   6  -2    5.84    1.28
   4   6  -2    5.71    1.30
   4   6  -2    3.99    1.51
   4   6  -2    5.02    1.27
   4   6  -2    5.73    1.62
   4   6  -2    4.97    1.32
   4   6  -1    0.58    0.72
   4   6  -1   -0.05    0.82
   4   6  -1    0.36    0.97
  -4  -6   1    1.01    0.88
   4   6  -1    0.29    0.91
   4   6  -1    0.07    1.31
   4   6   0  101.81    5.62
   4   6   0  105.88    6.13
   4   6   0  106.03    6.13
   4   6   0   97.66    5.57
  -4  -6   0  107.48    5.87
   4   6   0  103.06    5.64
   4   6   0  108.09    5.90
   4   6   0   89.96    5.31
   4   6   1   20.91    1.69
   4   6   1   20.73    1.93
  -4  -6  -1   26.93    2.24
   4   6   1   24.03    2.07
   4   6   1   19.61    1.74
  -4  -6  -2   12.10    1.68
  -4  -6  -2   12.45    1.72
   4   6   2   11.39    1.52
   4   6   2   12.01    1.40
   4   6   3    2.61    0.95
  -4  -6  -3    1.81    0.69
  -4  -6  -3    1.97    0.99
  -4  -6  -3    1.41    1.24
   4   6   3    2.15    0.92
   4   6   3    4.45    1.21
  -4  -6  -4   27.89    2.09
  -4  -6  -4   26.51    2.18
   4   6   4   26.69    2.22
   4   6   4   24.44    2.26
   4   6   4   33.16    2.48
   4   6   5   -0.06    1.09
  -4  -6  -5    0.69    0.88
   4   6   5    0.91    0.89
  -4  -6  -5    0.72    0.77
  -4  -6  -5    1.48    1.19
   4   6   5    0.38    0.84
  -4  -6  -6  123.57    6.34
  -4  -6  -6  109.66    5.99
  -4  -6  -6  122.89    6.63
  -4  -6  -6  117.97    6.65
   4   6   6  118.38    6.66
  -4  -6  -7   14.21    1.63
  -4  -6  -7   10.19    1.24
  -4  -6  -7   11.41    1.58
  -4  -6  -8    1.21    1.02
  -4  -6  -8    0.78    0.74
  -4  -6  -8    0.48    0.67
   4   6   9    4.64    1.24
  -4  -6  -9    5.02    1.04
  -4  -6  -9    4.13    0.82
   4   6  10    6.46    1.07
  -4  -6 -10    9.70    1.04
  -4  -6 -10    7.55    0.83
   4   7  -6    8.32    1.19
   4   7  -5    2.54    0.77
   4   7  -5    3.07    1.00
   4   7  -5    1.79    1.08
   4   7  -5    2.58    1.12
   4   7  -5    1.88    1.13
   4   7  -4    5.47    1.15
   4   7  -4    7.37    1.39
   4   7  -4    5.22    1.42
   4   7  -3    2.20    1.14
   4   7  -3    2.25    0.98
   4   7  -3    1.76    0.67
   4   7  -3    3.73    1.21
   4   7  -3    1.38    1.34
   4   7  -3    2.28    1.28
   4   7  -3    0.45    1.44
   4   7  -2   14.45    1.76
   4   7  -2   12.52    1.43
   4   7  -2   14.51    2.13
   4   7  -2   13.00    1.77
   4   7  -2   11.66    1.75
   4   7  -2   10.70    2.08
   4   7  -1    2.38    0.98
   4   7  -1    1.85    0.88
   4   7  -1    2.23    1.42
  -4  -7   1    1.66    0.86
   4   7  -1    2.06    1.08
   4   7  -1    2.04    1.20
   4   7  -1    0.99    1.53
   4   7  -1    2.30    1.14
   4   7   0    1.58    0.70
   4   7   0    1.26    0.93
   4   7   0    2.60    0.91
  -4  -7   0    3.63    1.11
   4   7   0    2.64    1.04
   4   7   0    4.18    1.26
   4   7   1   23.80    2.31
  -4  -7  -1   20.25    2.31
   4   7   1   20.57    1.71
  -4  -7  -1   21.16    2.19
   4   7   1   22.00    2.12
   4   7   1   18.68    1.74
   4   7   2    6.22    1.17
   4   7   2    3.69    1.51
   4   7   2    4.98    1.38
  -4  -7  -2    5.59    1.58
  -4  -7  -2    2.93    1.41
   4   7   2    3.67    1.28
   4   7   3   29.68    2.58
  -4  -7  -3   29.60    2.62
  -4  -7  -3   24.09    2.34
   4   7   3   25.41    2.28
   4   7   3   27.37    2.29
   4   7   4    1.21    1.05
  -4  -7  -4    0.56    0.66
   4   7   4    1.17    1.02
  -4  -7  -4    1.65    1.02
  -4  -7  -4    1.64    1.42
   4   7   4    0.10    0.83
  -4  -7  -5   47.32    3.06
   4   7   5   50.26    3.39
  -4  -7  -5   43.99    3.08
   4   7   5   42.44    3.05
   4   7   5   50.53    3.48
   4   7   6    2.64    1.25
  -4  -7  -6    2.89    0.97
  -4  -7  -6    3.28    1.29
  -4  -7  -6    2.89    0.88
  -4  -7  -6    2.93    1.35
  -4  -7  -7   15.61    1.57
  -4  -7  -7   16.00    1.75
  -4  -7  -7   12.91    1.68
  -4  -7  -8    2.12    0.92
  -4  -7  -8    0.92    0.78
  -4  -7  -9   19.22    1.59
   4   7   9   17.60    1.75
   4   8  -5    0.38    0.47
   4   8  -5    1.45    0.66
  -4  -8   5    0.83    0.76
   4   8  -5   -0.08    0.73
   4   8  -4    2.45    0.77
   4   8  -4    1.62    0.85
  -4  -8   4   -0.34    1.05
   4   8  -4    1.28    0.93
   4   8  -3   12.80    1.53
   4   8  -3   13.39    1.44
  -4  -8   3   10.92    1.83
   4   8  -3   11.76    1.70
   4   8  -2    4.12    1.26
   4   8  -2    4.38    1.22
   4   8  -2    5.09    1.18
   4   8  -2    2.52    0.90
  -4  -8   2    5.05    1.70
   4   8  -2    2.90    1.28
   4   8  -1   49.86    3.61
  -4  -8   1   50.16    3.78
   4   8  -1   47.66    3.21
   4   8  -1   40.69    3.06
   4   8  -1   47.47    3.39
   4   8  -1   52.58    3.56
   4   8   0    2.02    0.69
   4   8   0    2.84    1.37
   4   8   0    2.21    0.99
   4   8   0    3.08    0.88
  -4  -8   0    3.56    1.03
   4   8   0    2.85    1.07
   4   8   0    2.82    1.22
   4   8   1    0.45    0.72
   4   8   1    0.30    1.25
   4   8   1    0.72    1.05
  -4  -8  -1    0.70    1.03
   4   8   1   -0.35    1.07
   4   8   2   24.64    2.47
   4   8   2   22.26    2.19
  -4  -8  -2   18.74    2.25
  -4  -8  -2   25.58    2.39
   4   8   2   20.49    2.07
   4   8   2   18.85    1.84
   4   8   3   27.64    2.54
  -4  -8  -3   24.43    2.35
   4   8   3   24.20    2.35
  -4  -8  -3   24.04    2.45
   4   8   3   23.92    2.14
   4   8   3   20.45    2.07
   4   8   4    1.42    1.09
   4   8   4    1.51    1.23
  -4  -8  -4    1.52    1.10
  -4  -8  -4    0.61    1.35
   4   8   4    0.78    0.89
  -4  -8  -5   13.69    1.56
   4   8   5   14.88    1.75
  -4  -8  -5   15.77    1.82
   4   8   5   12.15    1.38
   4   8   5   15.11    1.81
  -4  -8  -6    8.23    1.19
   4   8   6    7.13    1.49
  -4  -8  -6    8.92    1.14
  -4  -8  -6   12.28    1.56
  -4  -8  -6   10.15    1.67
   4   8   7    3.40    1.20
  -4  -8  -7    4.54    0.89
  -4  -8  -7    2.81    1.07
  -4  -8  -7    2.97    0.72
  -4  -8  -7    4.96    1.19
  -4  -8  -8    2.44    0.72
  -4  -8  -8    3.32    0.80
  -4  -8  -9    1.49    0.53
   4   9  -3    3.35    0.82
  -4  -9   3    1.37    0.93
   4   9  -2   15.72    1.56
   4   9  -2   15.34    1.45
   4   9  -2   12.57    1.20
  -4  -9   2   13.33    1.66
   4   9  -2   13.86    1.57
   4   9  -2   13.92    1.51
   4   9  -1   29.01    2.37
  -4  -9   1   22.08    2.30
   4   9  -1   24.69    1.91
   4   9  -1   20.55    1.84
   4   9  -1   22.46    2.10
   4   9   0    8.02    1.38
   4   9   0   10.28    1.69
   4   9   0    5.93    1.20
   4   9   1   27.05    2.47
   4   9   1   18.96    1.86
  -4  -9  -1   21.55    1.91
   4   9   1   22.52    2.02
   4   9   1   14.37    1.51
   4   9   2   -0.15    0.85
   4   9   2   -0.04    0.68
   4   9   2    1.14    1.29
   4   9   2    1.07    1.03
  -4  -9  -2   -0.23    1.11
  -4  -9  -2   -0.22    1.01
   4   9   3    0.68    0.79
   4   9   3   -0.28    1.18
   4   9   3    0.94    1.05
  -4  -9  -3   -0.53    1.11
  -4  -9  -3   -0.84    1.16
   4   9   3    0.37    0.83
   4   9   4    8.77    1.35
   4   9   4   14.85    1.79
  -4  -9  -4    9.52    1.36
  -4  -9  -4   11.14    1.49
  -4  -9  -4   13.44    1.78
   4   9   4    8.07    1.17
   4   9   5   14.87    1.74
  -4  -9  -5   13.57    1.53
   4   9   5   14.09    1.81
  -4  -9  -5   12.19    1.56
  -4  -9  -5   17.28    1.96
   4   9   5   14.27    1.69
   4   9   6    7.60    1.24
   4   9   6    5.93    1.24
  -4  -9  -6    7.75    1.20
  -4  -9  -6    6.15    0.97
   4   9   7    5.65    1.09
   4   9   7    5.52    1.09
  -4  -9  -7    3.55    0.70
   4   9   8    0.03    0.60
   4   9   8    0.45    0.60
  -4  -9  -8    0.46    0.52
   4  10  -2   -0.12    0.50
  -4 -10   2    0.16    0.56
   4  10  -1    1.37    0.64
   4  10  -1    1.83    0.75
   4  10  -1    1.09    0.50
  -4 -10   1    0.70    0.76
   4  10   0    3.05    0.86
   4  10   0    4.40    1.14
   4  10   0    2.28    0.75
  -4 -10   0    3.45    1.06
   4  10   1    1.80    0.75
   4  10   1    0.81    0.75
   4  10   2   22.49    2.01
   4  10   2   16.40    1.60
  -4 -10  -2   22.18    1.64
   4  10   2   14.66    1.40
   4  10   2    9.67    1.17
   4  10   3    1.97    0.64
   4  10   3    1.73    0.68
   4  10   3    4.54    1.15
   4  10   3    2.76    0.94
  -4 -10  -3    1.72    0.93
  -4 -10  -3    3.33    0.96
   4  10   4    9.75    1.18
   4  10   4   14.75    1.63
  -4 -10  -4   12.03    1.36
  -4 -10  -4   10.18    1.13
  -4 -10  -4   14.43    1.55
  -4 -10  -5   14.08    1.33
   4  10   5   14.01    1.53
  -4 -10  -5   12.96    1.24
   4  10   5   12.75    1.34
   4  10   6    8.16    0.99
   4  10   6    6.38    1.07
  -4 -10  -6    6.08    0.83
   4  11   2    0.53    0.61
   4  11   2    0.14    0.42
   4  11   3    0.27    0.61
   4  11   3    0.02    0.51
  -4 -11  -3    0.46    0.52
   5  -9  -2    1.15    0.54
   5  -8  -5    3.78    0.74
   5  -8  -5    3.42    0.86
   5  -8  -4   26.22    1.94
   5  -8  -4   27.09    1.99
   5  -8  -4   27.02    2.12
   5  -8  -3    0.81    0.74
   5  -8  -3    0.45    0.79
   5  -8  -2    0.67    0.78
   5  -8  -2    1.84    0.75
   5  -8  -1   55.89    3.26
   5  -8  -1   53.69    3.07
  -5   8   1   50.83    2.85
  -5   8   0    6.85    0.91
   5  -8   0    7.11    1.14
   5  -8   0    5.75    0.90
   5  -8   0    6.92    1.05
  -5   8  -1    7.19    0.90
   5  -8   1    5.28    0.85
   5  -8   1    5.60    0.88
   5  -8   1    5.15    0.94
   5  -8   2   24.96    1.73
   5  -8   2   23.53    1.72
   5  -8   2   20.71    1.59
  -5   7   7    0.28    0.57
  -5   7   7    1.38    0.68
   5  -7  -7    0.54    0.49
   5  -7  -7    0.87    0.60
  -5   7   6   19.22    1.75
  -5   7   6   20.05    1.70
   5  -7  -6   16.00    1.43
   5  -7  -6   15.51    1.49
  -5   7   5    0.64    0.90
   5  -7  -5    1.16    0.59
   5  -7  -5    1.05    0.80
   5  -7  -5    1.30    0.64
   5  -7  -5    1.27    0.97
  -5   7   4    3.49    0.97
   5  -7  -4    3.21    1.05
   5  -7  -4    4.16    1.25
   5  -7  -4    2.08    0.91
   5  -7  -3    1.07    0.95
  -5   7   3    0.20    0.92
   5  -7  -3   -0.27    1.00
   5  -7  -2  147.44    8.36
   5  -7  -2  173.90    8.77
  -5   7   2  157.08    8.32
   5  -7  -1   10.05    1.27
   5  -7  -1   12.73    1.48
   5  -7  -1   11.54    1.42
  -5   7   1   10.74    1.26
  -5   7   0    1.43    0.76
   5  -7   0    2.01    0.90
   5  -7   0    2.91    1.01
  -5   7  -1    0.19    0.72
   5  -7   1    0.20    0.81
   5  -7   1   -0.23    0.79
  -5   7  -1   -0.18    0.54
   5  -7   1    0.84    0.81
   5  -7   2   29.90    2.30
  -5   7  -2   31.45    2.11
   5  -7   2   28.24    2.12
  -5   7  -2   33.35    2.28
  -5   7  -3    1.33    0.73
   5  -7   3    0.15    0.54
  -5   7  -3   -0.14    0.67
   5  -7   3    0.53    0.73
  -5   7  -3    1.60    0.64
   5  -7   3    0.68    0.56
  -5   7  -4    1.43    0.76
  -5   7  -4    4.15    0.75
   5  -7   4    2.80    0.75
  -5   7  -4    3.83    0.71
  -5   6   8   16.25    1.66
   5  -6  -8   17.12    1.42
  -5   6   8   19.02    1.47
  -5   6   7   52.82    3.65
   5  -6  -7   53.29    3.27
  -5   6   7   60.63    3.44
   5  -6  -7   46.45    3.15
   5  -6  -7   60.50    3.46
  -5   6   6    1.31    0.74
  -5   6   6    1.44    0.92
   5  -6  -6    1.76    0.87
   5  -6  -6    0.40    0.72
   5  -6  -6    1.43    0.98
  -5   6   5  104.49    6.58
   5  -6  -5  106.62    6.10
   5  -6  -5  120.81    6.37
   5  -6  -5  108.47    6.09
  -5   6   4   46.73    3.46
   5  -6  -4   46.76    3.10
   5  -6  -4   36.42    2.76
  -5   6   4   51.12    3.35
   5  -6  -4   43.83    3.11
   5  -6  -4   49.14    3.45
  -5   6   3  185.97    9.73
   5  -6  -3  193.84    9.66
   5  -6  -3  161.97    9.18
   5  -6  -3  199.72    9.83
  -5   6   2   47.49    3.30
   5  -6  -2   50.50    3.25
   5  -6  -2   55.65    3.48
   5  -6  -2   53.39    3.56
  -5   6   2   45.06    2.99
   5  -6  -1  135.09    7.53
  -5   6   1  158.05    8.49
   5  -6  -1  149.30    7.64
   5  -6  -1  133.34    7.62
  -5   6   1  136.87    7.35
   5  -6   0   88.04    5.08
   5  -6   0   90.35    5.06
   5  -6   0   79.11    4.92
  -5   6   0   86.23    4.88
   5  -6   1   14.06    1.80
  -5   6  -1   17.49    1.49
   5  -6   1   14.56    1.64
  -5   6  -1   16.18    1.61
   5  -6   2   30.39    2.40
  -5   6  -2   30.24    2.13
   5  -6   2   25.53    2.15
  -5   6  -2   25.73    2.21
  -5   6  -2   30.36    2.28
  -5   6  -3   -0.24    0.88
  -5   6  -3    0.28    0.73
  -5   6  -3    0.31    0.83
   5  -6   3    0.70    0.76
   5  -6   3    2.03    1.07
   5  -6   3    0.43    0.71
  -5   6  -4   27.80    2.03
  -5   6  -4   30.19    2.03
   5  -6   4   25.00    2.02
  -5   6  -4   23.74    2.12
  -5   6  -5    1.26    0.87
  -5   6  -5    0.91    0.68
   5  -6   5    0.30    0.64
  -5   6  -5    1.10    0.72
  -5   6  -5    0.88    0.55
  -5   5   8    0.56    0.77
  -5   5   8    0.70    0.68
   5  -5  -8    0.39    0.52
   5  -5  -8    0.47    0.72
   5  -5  -8    0.80    0.54
  -5   5   7   -0.19    0.85
   5  -5  -7    0.16    0.75
   5  -5  -7    0.17    0.82
   5  -5  -7    0.90    0.82
   5  -5  -6  141.61    7.74
   5  -5  -6  142.82    7.81
   5  -5  -6  166.04    8.13
  -5   5   6  137.30    7.88
   5  -5  -5    1.37    0.71
  -5   5   5   -0.24    1.07
  -5   5   5    1.86    1.09
   5  -5  -5    0.48    1.01
   5  -5  -5    1.06    0.88
   5  -5  -4    0.45    0.81
   5  -5  -4    0.04    0.60
  -5   5   4    1.04    1.03
  -5   5   4    1.17    1.04
   5  -5  -4    0.89    0.79
   5  -5  -4   -0.12    1.09
  -5   5   3    6.27    1.58
   5  -5  -3    7.56    1.30
   5  -5  -3    7.44    1.10
  -5   5   3    7.03    1.30
  -5   5   3    8.00    1.40
   5  -5  -3    9.38    1.42
   5  -5  -3    6.66    1.05
   5  -5  -3    7.58    1.51
  -5   5   2   11.49    1.45
  -5   5   2   13.38    1.82
   5  -5  -2   15.58    1.57
  -5   5   2   17.10    1.86
   5  -5  -2   18.52    1.78
   5  -5  -2   15.27    1.83
  -5   5   1   98.36    5.46
   5  -5  -1   91.86    5.34
  -5   5   1  104.16    6.11
   5  -5  -1  101.65    5.39
   5  -5  -1   89.10    5.42
  -5   5   1   82.89    5.02
  -5   5   0  224.13   12.26
   5  -5   0  257.99   12.57
  -5   5   0  268.45   13.26
   5  -5   0  245.98   12.49
   5  -5   0  262.01   12.46
  -5   5   0  237.41   12.28
  -5   5  -1   77.81    5.30
  -5   5  -1   76.90    4.41
   5  -5   1   81.76    4.64
   5  -5   1   72.66    4.51
  -5   5  -1   78.64    4.56
  -5   5  -1   84.41    4.59
  -5   5  -2   38.35    2.56
   5  -5   2   31.25    2.50
  -5   5  -2   39.16    2.76
  -5   5  -2   40.48    2.71
  -5   5  -3   11.12    1.55
   5  -5   3    9.73    1.32
  -5   5  -3   10.52    1.31
   5  -5   3    8.13    1.17
  -5   5  -3   12.04    1.47
  -5   5  -4    3.60    1.25
  -5   5  -4    5.26    1.14
  -5   5  -4    5.46    1.11
   5  -5   4    3.77    0.82
  -5   5  -5    0.49    1.06
  -5   5  -5    1.12    0.87
   5  -5   5    1.47    0.88
  -5   5  -5    0.81    0.91
  -5   5  -6   28.71    2.03
   5  -5   6   22.21    1.73
  -5   5  -6   25.48    2.01
  -5   5  -6   26.05    1.86
  -5   5  -6   20.62    2.12
  -5   4   9   32.29    2.27
   5  -4  -9   29.27    1.95
   5  -4  -8   40.98    2.61
   5  -4  -8   35.34    2.33
   5  -4  -7   16.14    1.72
   5  -4  -7   13.99    1.64
   5  -4  -7   12.03    1.36
   5  -4  -7   13.83    1.59
   5  -4  -7   13.85    1.58
   5  -4  -6   59.37    3.86
   5  -4  -6   61.29    3.75
   5  -4  -6   50.88    3.39
   5  -4  -6   56.84    3.75
   5  -4  -6   61.16    3.89
   5  -4  -5    0.55    0.98
   5  -4  -5    0.75    0.63
   5  -4  -5    0.57    0.87
   5  -4  -5    1.27    1.05
   5  -4  -4  368.14   17.41
   5  -4  -4  338.91   17.08
   5  -4  -4  328.98   17.09
   5  -4  -4  368.63   17.30
   5  -4  -3   51.08    3.44
   5  -4  -3   50.37    3.30
   5  -4  -3   47.43    3.17
  -5   4   3   58.97    3.65
   5  -4  -3   60.67    3.57
   5  -4  -3   55.40    3.68
  -5   4   3   50.19    3.67
  -5   4   2    1.20    1.19
   5  -4  -2    0.47    0.72
  -5   4   2    0.89    0.96
  -5   4   2    0.26    0.95
   5  -4  -2    0.26    0.87
   5  -4  -2    1.11    0.96
  -5   4   1    2.60    1.07
  -5   4   1    2.63    0.68
  -5   4   1    3.45    1.37
   5  -4  -1    3.27    0.94
  -5   4   1    2.36    0.90
  -5   4   1    1.81    0.99
   5  -4  -1    3.47    0.97
   5  -4  -1    3.53    1.03
  -5   4   0   36.91    2.55
  -5   4   0   33.82    2.65
  -5   4   0   35.26    3.19
   5  -4   0   39.03    2.59
   5  -4   0   38.44    2.72
  -5   4   0   38.48    2.43
  -5   4  -1 1944.63  102.16
   5  -4   1 2345.14  102.51
  -5   4  -1 2156.92  102.06
   5  -4   1 2231.71  102.25
   5  -4   1 2143.13  102.30
  -5   4  -1 2198.64  102.28
  -5   4  -1 2281.63  102.22
   5  -4   2   78.34    4.71
  -5   4  -2   80.39    4.45
   5  -4   2   72.66    4.42
  -5   4  -2   77.92    4.64
  -5   4  -2   84.24    4.57
  -5   4  -3    9.50    1.50
   5  -4   3   10.23    1.33
  -5   4  -3   10.47    1.34
   5  -4   3    8.01    1.13
  -5   4  -3   10.93    1.41
  -5   4  -4   52.11    3.46
   5  -4   4   51.11    3.30
  -5   4  -4   54.11    3.46
  -5   4  -4   51.61    3.63
  -5   4  -5   70.61    4.21
  -5   4  -5   67.99    4.19
  -5   4  -5   60.14    4.27
  -5   4  -6   12.37    1.54
  -5   4  -6    8.49    1.62
   5  -4   6    7.51    1.12
  -5   4  -6   11.63    1.53
  -5   4  -6   11.19    1.48
  -5   4  -7   25.99    2.08
  -5   4  -7   25.43    2.11
  -5   4  -7   26.12    1.95
  -5   3   9   32.57    2.59
   5  -3  -9   34.07    2.46
   5  -3  -9   40.10    2.41
   5  -3  -8   20.54    1.82
   5  -3  -8   17.14    1.73
   5  -3  -7   14.47    1.82
   5  -3  -7   15.74    1.83
   5  -3  -7   14.28    1.63
   5  -3  -7   14.59    1.58
   5  -3  -7   12.97    1.66
   5  -3  -6  280.18   13.48
   5  -3  -6  256.83   13.39
   5  -3  -6  251.56   13.29
   5  -3  -6  263.65   13.19
   5  -3  -6  248.38   13.37
   5  -3  -6  277.24   13.44
   5  -3  -5   15.56    1.74
   5  -3  -5   13.24    1.68
   5  -3  -5   15.77    1.65
   5  -3  -5   14.65    1.78
   5  -3  -5   13.77    1.71
   5  -3  -5   11.80    1.33
   5  -3  -4   89.44    5.31
   5  -3  -4   93.34    5.19
   5  -3  -4   88.45    5.14
   5  -3  -4   90.59    5.16
   5  -3  -4  105.43    5.56
   5  -3  -3   17.02    1.70
   5  -3  -3   19.12    1.69
   5  -3  -3   17.95    1.61
   5  -3  -3   15.06    1.44
   5  -3  -3   18.56    1.72
   5  -3  -3   18.54    1.86
   5  -3  -2    5.03    1.02
   5  -3  -2    7.28    1.03
  -5   3   2    4.73    1.18
  -5   3   2    4.98    1.04
   5  -3  -2    4.56    0.98
   5  -3  -2    3.07    0.70
   5  -3  -2    4.10    1.07
  -5   3   1   26.78    2.53
   5  -3  -1   31.04    2.25
  -5   3   1   32.41    2.37
   5  -3  -1   32.96    2.19
   5  -3  -1   29.70    2.33
  -5   3   1   32.76    2.50
  -5   3   0   53.21    3.41
  -5   3   0   53.20    3.57
  -5   3   0   59.83    3.50
   5  -3   0   58.59    3.29
   5  -3   0   53.93    3.41
  -5   3   0   51.89    3.09
  -5   3  -1   51.73    3.22
  -5   3  -1   50.47    3.32
   5  -3   1   52.37    3.36
  -5   3  -1   53.21    2.98
   5  -3   1   50.43    3.08
   5  -3   1   54.70    3.27
  -5   3  -1   50.38    3.19
  -5   3  -1   50.70    3.03
  -5   3  -2   95.93    5.37
  -5   3  -2   96.04    5.40
   5  -3   2   98.42    5.55
  -5   3  -2  101.43    5.31
   5  -3   2   91.06    5.23
  -5   3  -2  102.01    5.59
  -5   3  -2  109.28    5.41
  -5   3  -3    0.71    1.05
  -5   3  -3    0.91    0.64
  -5   3  -3    3.20    0.88
   5  -3   3    0.31    0.81
  -5   3  -3    0.99    0.76
  -5   3  -3    1.78    0.71
   5  -3   3    1.16    0.66
  -5   3  -4   81.81    4.60
  -5   3  -4   70.05    4.20
   5  -3   4   70.01    4.31
  -5   3  -4   81.27    4.54
  -5   3  -5    7.55    1.77
  -5   3  -5    9.32    1.47
  -5   3  -5    7.84    1.43
  -5   3  -5    7.94    1.03
  -5   3  -6   54.04    3.39
  -5   3  -6   53.12    3.45
  -5   3  -6   47.14    3.62
  -5   3  -7   16.42    1.79
  -5   3  -7   19.19    1.93
  -5   3  -7   15.28    1.65
  -5   3  -8   11.70    1.41
  -5   3  -8   12.88    1.25
  -5   3  -8   10.56    1.46
  -5   2   9    7.98    1.21
   5  -2  -9   10.01    1.17
   5  -2  -9    5.86    0.88
   5  -2  -9    9.17    1.20
   5  -2  -8    5.02    1.24
   5  -2  -8    7.62    1.24
   5  -2  -8    5.48    1.15
   5  -2  -8    7.72    1.34
   5  -2  -7  822.83   37.30
   5  -2  -7  860.84   37.49
   5  -2  -7  844.71   37.37
   5  -2  -7  771.99   37.24
   5  -2  -7  710.90   37.16
   5  -2  -7  703.56   36.94
   5  -2  -6   11.98    1.61
   5  -2  -6   12.10    1.56
   5  -2  -6    6.03    1.05
   5  -2  -6   11.11    1.41
   5  -2  -6    9.00    1.53
   5  -2  -6   11.10    1.55
   5  -2  -6    8.89    1.33
   5  -2  -5   46.52    3.30
   5  -2  -5   48.14    3.21
   5  -2  -5   53.27    3.39
   5  -2  -5   45.92    3.07
   5  -2  -4    8.55    1.28
   5  -2  -4    8.51    1.06
   5  -2  -4    8.05    1.11
   5  -2  -4    7.90    1.27
   5  -2  -4    7.94    1.05
   5  -2  -4    7.58    1.12
   5  -2  -4    9.14    1.33
   5  -2  -3    4.35    0.86
   5  -2  -3    5.04    0.92
   5  -2  -3    3.51    0.96
   5  -2  -3    3.29    0.70
   5  -2  -3    4.40    0.99
   5  -2  -3    3.71    0.77
  -5   2   2  181.98   14.02
   5  -2  -2  250.65   11.62
   5  -2  -2  196.85   11.24
   5  -2  -2  236.24   11.66
  -5   2   2  253.18   11.66
   5  -2  -2  253.00   11.57
   5  -2  -2  242.80   11.75
  -5   2   1    6.52    1.37
  -5   2   1    7.73    1.09
   5  -2  -1    8.32    1.02
   5  -2  -1   12.05    1.27
  -5   2   1    9.86    2.66
  -5   2   0  100.69    5.80
  -5   2   0  104.32    5.90
  -5   2   0   84.85    8.02
   5  -2   0  103.75    5.69
   5  -2   0  106.70    5.64
  -5   2   0  109.74    5.68
   5  -2   0  107.31    5.44
  -5   2   0   92.59    6.64
   5  -2   0  103.26    5.66
  -5   2  -1   21.65    1.79
  -5   2  -1   21.53    1.84
  -5   2  -1   17.50    2.29
   5  -2   1   19.67    1.70
   5  -2   1   18.76    1.43
   5  -2   1   20.16    1.67
   5  -2   1   21.25    1.67
  -5   2  -1   17.32    1.62
  -5   2  -1   17.64    1.38
  -5   2  -2   16.11    1.52
  -5   2  -2   16.20    1.54
   5  -2   2   16.84    1.53
  -5   2  -2   15.09    1.28
   5  -2   2   14.80    1.22
  -5   2  -2    9.47    1.82
   5  -2   2   16.41    1.44
   5  -2   2   14.66    1.48
  -5   2  -2   12.76    1.55
  -5   2  -2   15.05    1.32
  -5   2  -3  130.76    7.02
  -5   2  -3  134.91    7.07
  -5   2  -3  135.40    7.11
   5  -2   3  132.91    7.10
  -5   2  -3  135.05    7.01
  -5   2  -4   57.84    3.37
  -5   2  -4   46.50    3.08
  -5   2  -4   52.08    3.25
   5  -2   4   49.70    3.17
  -5   2  -4   51.56    3.33
  -5   2  -4   50.90    3.60
  -5   2  -5    0.31    1.30
  -5   2  -5    0.75    0.94
   5  -2   5    1.19    0.81
  -5   2  -5    0.62    1.02
  -5   2  -5    0.94    0.75
  -5   2  -6    2.81    1.41
  -5   2  -6    1.27    1.12
   5  -2   6    1.90    0.76
  -5   2  -6    2.40    1.21
  -5   2  -6    3.52    0.89
  -5   2  -7   19.62    2.09
  -5   2  -7   18.56    1.67
  -5   2  -7   24.20    2.27
  -5   2  -8    0.79    0.98
  -5   2  -8    1.74    1.12
  -5   2  -8    0.93    0.84
  -5   2  -9    7.02    0.89
   5  -1  -9   21.08    1.82
   5  -1  -9   25.80    1.86
   5  -1  -8   61.47    3.87
   5  -1  -8   62.46    3.88
   5  -1  -8   53.51    3.66
   5  -1  -7   36.70    2.79
   5  -1  -7   33.77    2.72
   5  -1  -7   33.77    2.76
   5  -1  -6   91.92    5.37
   5  -1  -6  103.70    5.64
   5  -1  -6  104.80    5.55
   5  -1  -6   97.48    5.46
   5  -1  -6   98.83    5.53
   5  -1  -6   87.85    5.20
   5  -1  -5   20.37    1.93
   5  -1  -5   26.01    2.15
   5  -1  -5   24.11    2.08
   5  -1  -5   21.64    1.90
   5  -1  -5   22.27    1.98
   5  -1  -5   22.17    1.96
   5  -1  -4    4.72    1.05
   5  -1  -4    3.55    0.77
   5  -1  -4    5.36    0.96
   5  -1  -4    3.63    0.87
   5  -1  -4    4.34    0.99
   5  -1  -4    3.46    1.06
   5  -1  -4    3.19    0.89
   5  -1  -4    4.66    1.03
   5  -1  -3    7.66    1.09
   5  -1  -3    5.90    0.98
   5  -1  -3    5.27    0.83
   5  -1  -3    5.48    0.91
  -5   1   3    4.61    1.92
   5  -1  -3    6.19    0.92
   5  -1  -3    5.50    1.02
   5  -1  -2   11.69    1.24
   5  -1  -2   12.40    1.27
   5  -1  -2   10.39    1.01
  -5   1   2   11.70    1.15
   5  -1  -2   14.62    1.29
   5  -1  -2   10.82    1.04
  -5   1   2    8.98    2.38
  -5   1   2   13.18    2.03
  -5   1   1  764.14   44.02
  -5   1   1  851.89   41.58
   5  -1  -1  912.45   41.55
   5  -1  -1  891.30   41.72
   5  -1  -1  887.27   41.74
  -5   1   1  865.52   42.99
  -5   1   0  437.30   25.57
   5  -1   0  473.80   23.11
   5  -1   0  490.87   23.06
   5  -1   0  485.11   22.88
  -5   1   0  471.16   23.01
   5  -1   0  481.04   23.13
  -5   1   0  513.95   24.47
  -5   1   0  469.79   23.31
  -5   1  -1  186.62    8.65
  -5   1  -1  169.45    8.63
   5  -1   1  171.73    8.42
   5  -1   1  165.94    8.32
   5  -1   1  150.26    8.07
   5  -1   1  167.99    8.40
  -5   1  -1  146.63    8.38
  -5   1  -1  182.69    9.62
  -5   1  -2    2.26    0.91
  -5   1  -2    1.44    0.83
  -5   1  -2    1.43    0.55
   5  -1   2    2.27    0.75
   5  -1   2    2.42    0.76
  -5   1  -2    2.18    0.86
  -5   1  -2    1.02    0.96
  -5   1  -2    3.60    2.10
   5  -1   2    2.55    0.72
  -5   1  -2    2.52    0.62
  -5   1  -3   21.19    1.64
  -5   1  -3   22.81    1.85
  -5   1  -3   21.33    1.79
   5  -1   3   21.92    1.73
  -5   1  -3   22.59    1.69
   5  -1   3   19.44    1.64
  -5   1  -3   22.61    2.01
  -5   1  -4   78.99    4.31
  -5   1  -4   68.54    4.24
  -5   1  -4   84.84    4.45
   5  -1   4   65.14    4.11
   5  -1   4   68.17    4.12
  -5   1  -4   68.15    4.31
  -5   1  -5    2.61    1.37
  -5   1  -5    2.64    0.81
  -5   1  -5    3.53    1.07
   5  -1   5    3.55    0.82
  -5   1  -5    3.76    1.11
  -5   1  -5    2.37    0.93
  -5   1  -6    3.76    0.84
  -5   1  -6    5.92    1.36
  -5   1  -6    5.69    1.42
  -5   1  -7   18.97    2.05
  -5   1  -7   17.26    1.72
  -5   1  -7   16.84    2.13
  -5   1  -7   17.13    1.96
  -5   1  -8   21.79    2.23
  -5   1  -8   20.45    1.78
  -5   1  -8   23.05    2.34
  -5   1  -9    4.42    1.09
  -5   1  -9    3.00    0.61
   5   0  -9    1.06    0.73
   5   0  -9    0.70    0.59
   5   0  -8    0.71    0.87
   5   0  -8    0.31    0.91
   5   0  -8    1.39    0.93
   5   0  -8    1.38    1.04
  -5   0   7   14.51    1.95
   5   0  -7   18.21    1.66
   5   0  -7   19.84    2.02
   5   0  -7   24.61    2.21
   5   0  -7   24.75    2.21
   5   0  -7   22.46    2.15
   5   0  -6    0.16    1.00
   5   0  -6    0.09    0.75
   5   0  -6    0.78    1.00
   5   0  -6   -0.28    1.14
   5   0  -6    1.88    1.19
   5   0  -5  667.05   33.18
   5   0  -5  712.93   33.24
   5   0  -5  722.88   33.33
   5   0  -5  669.81   33.11
   5   0  -4    2.00    0.88
   5   0  -4    3.63    0.98
   5   0  -4    1.44    0.66
   5   0  -4    2.93    1.01
   5   0  -4    2.92    0.96
   5   0  -4    3.00    0.86
   5   0  -3   88.37    4.84
   5   0  -3   90.26    4.99
   5   0  -3   83.88    4.77
   5   0  -3   90.27    4.88
   5   0  -3   98.14    4.98
   5   0  -3   93.37    5.01
  -5   0   2  154.36    8.62
  -5   0   2  150.27   10.23
   5   0  -2  169.52    8.33
   5   0  -2  150.48    8.08
  -5   0   2  151.81    8.08
   5   0  -2  158.72    8.22
   5   0  -2  187.76    8.33
   5   0  -2  173.97    8.44
  -5   0   2  180.25    9.78
  -5   0   1  401.65   19.47
  -5   0   1  358.41   18.94
  -5   0   1  377.02   21.24
   5   0  -1  403.23   19.21
   5   0  -1  422.06   19.20
   5   0  -1  437.95   19.09
   5   0  -1  389.65   19.05
   5   0  -1  418.85   19.25
   5   0  -1  379.79   18.99
  -5   0   1  379.92   19.47
   5   0   0   50.64    6.20
  -5   0   0   41.78    2.78
   5   0   0   39.31    2.52
  -5   0   0   30.22    3.87
   5   0   0   38.91    2.48
   5   0   0   39.04    2.33
   5   0   0   41.56    2.59
   5   0   0   39.35    2.47
  -5   0   0   43.64    2.87
   5   0   1  459.48   21.80
   5   0   1  428.68   21.44
   5   0   1  472.33   21.84
   5   0   1  468.88   21.69
  -5   0  -2   35.68    2.26
  -5   0  -2   42.57    2.72
  -5   0  -2   38.34    4.35
   5   0   2   38.84    2.49
   5   0   2   42.63    2.44
  -5   0  -2   34.52    2.37
   5   0   2   39.57    2.55
  -5   0  -3    9.73    1.10
  -5   0  -3   10.95    1.48
  -5   0  -3   14.14    1.43
   5   0   3   11.87    1.22
  -5   0  -3   13.05    1.28
   5   0   3   11.31    1.21
   5   0   3   11.21    1.09
  -5   0  -3    8.99    2.47
  -5   0  -4   18.36    1.61
  -5   0  -4   18.84    1.72
  -5   0  -4   19.04    1.71
   5   0   4   17.66    1.51
   5   0   4   16.26    1.39
  -5   0  -4   15.93    1.94
  -5   0  -5  102.28    6.03
  -5   0  -5  108.58    5.99
  -5   0  -5  115.13    6.12
  -5   0  -5  109.07    6.14
  -5   0  -6   21.66    2.19
  -5   0  -6   21.46    1.91
  -5   0  -6   22.04    2.08
  -5   0  -6   23.15    2.31
  -5   0  -6   24.65    2.30
  -5   0  -7    5.42    1.63
  -5   0  -7    5.76    1.03
  -5   0  -7    7.28    1.53
  -5   0  -7    6.48    1.41
  -5   0  -7    6.59    1.30
  -5   0  -8    0.90    0.60
  -5   0  -8    1.39    1.10
  -5   0  -8    0.71    0.88
  -5   0  -8    1.15    1.42
  -5   0  -8    1.67    1.32
  -5   0  -9   -0.45    0.86
  -5   0  -9   -0.11    1.04
  -5   0  -9    0.53    0.69
   5   0   9    0.44    0.70
  -5  -1   9    8.80    1.24
   5   1  -9   19.00    1.41
   5   1  -8  105.73    5.78
   5   1  -8  106.11    5.75
   5   1  -8  106.72    5.85
   5   1  -7    0.75    0.89
   5   1  -7    1.14    0.71
   5   1  -7    0.70    1.09
   5   1  -7    0.97    1.06
   5   1  -7    0.17    1.18
   5   1  -6    7.29    1.30
  -5  -1   6    6.63    1.32
   5   1  -6    6.53    1.22
   5   1  -6    8.26    1.43
   5   1  -6    9.73    1.59
   5   1  -5    4.55    1.09
  -5  -1   5    5.61    1.29
   5   1  -5    3.58    1.16
   5   1  -5    5.11    1.23
   5   1  -5    4.42    1.31
   5   1  -5    3.33    0.83
   5   1  -5    2.89    1.17
   5   1  -4  768.98   40.65
   5   1  -4  904.73   40.99
   5   1  -4  811.64   40.86
   5   1  -4  922.36   40.92
   5   1  -4  879.80   40.96
   5   1  -4  948.89   41.03
   5   1  -4  827.87   40.81
  -5  -1   3  110.73    6.96
  -5  -1   3  104.58    8.30
   5   1  -3  129.43    6.92
   5   1  -3  131.93    6.88
   5   1  -3  133.24    6.79
   5   1  -3  146.78    6.96
   5   1  -3  132.67    6.91
   5   1  -3  133.12    6.82
  -5  -1   3  124.33    8.06
   5   1  -2    9.48    3.49
  -5  -1   2    5.35    1.18
   5   1  -2    7.39    0.97
   5   1  -2    7.34    1.01
   5   1  -2    6.69    0.92
  -5  -1   2    6.85    1.92
   5   1  -2    6.48    1.04
   5   1  -2    5.76    0.86
   5   1  -2    6.09    0.78
  -5  -1   1   68.74    4.19
   5   1  -1   72.16    4.02
   5   1  -1   72.66    4.00
   5   1  -1   64.03    3.74
   5   1  -1   74.11    4.00
   5   1  -1   75.83    3.88
   5   1  -1   71.67    3.90
  -5  -1   1   66.21    4.20
  -5  -1   0  384.30   18.30
  -5  -1   0  343.01   19.85
   5   1   0  378.26   18.08
   5   1   0  348.20   17.87
   5   1   0  343.67   18.03
   5   1   0  382.69   18.20
   5   1   0  414.77   18.17
  -5  -1   0  410.66   18.38
  -5  -1  -1   27.66    2.11
  -5  -1  -1   30.59    2.18
   5   1   1   24.37    4.50
   5   1   1   28.11    2.01
   5   1   1   28.62    1.90
   5   1   1   27.02    2.04
   5   1   1   28.14    2.01
  -5  -1  -2  126.78    6.05
  -5  -1  -2  119.61    5.99
  -5  -1  -2  100.02    7.51
   5   1   2  110.27    5.84
  -5  -1  -2   96.77    5.70
   5   1   2  104.97    5.65
   5   1   2  114.47    5.91
  -5  -1  -3   94.38    5.35
  -5  -1  -3  102.89    5.51
  -5  -1  -3   89.07    7.25
   5   1   3  109.72    5.52
   5   1   3  100.94    5.25
   5   1   3  104.81    5.55
  -5  -1  -4    4.80    1.00
  -5  -1  -4    3.20    0.87
   5   1   4    3.88    0.78
  -5  -1  -4    3.16    0.98
  -5  -1  -4    4.26    0.68
  -5  -1  -4    2.17    1.71
  -5  -1  -5   53.42    3.31
  -5  -1  -5   55.89    3.33
  -5  -1  -5   47.17    3.37
  -5  -1  -5   43.50    2.84
  -5  -1  -6    6.11    1.18
  -5  -1  -6    2.98    1.26
  -5  -1  -6    2.11    1.44
  -5  -1  -6    4.94    1.35
  -5  -1  -7    7.62    1.30
  -5  -1  -7   11.04    1.61
  -5  -1  -7    8.81    1.69
  -5  -1  -7    9.98    1.96
  -5  -1  -8    3.85    0.94
  -5  -1  -8    3.12    1.48
  -5  -1  -8    1.61    1.54
  -5  -1  -8    2.61    1.16
  -5  -1  -8    2.27    1.12
  -5  -1  -9    0.85    0.57
  -5  -1  -9    0.70    1.27
  -5  -1  -9    1.11    1.01
  -5  -1  -9    1.45    0.94
   5   1   9    1.70    0.81
  -5  -1 -10    1.67    0.75
  -5  -1 -10    0.95    0.60
   5   2  -9    5.16    0.86
   5   2  -9    4.62    0.87
   5   2  -9    4.68    0.87
   5   2  -8    0.49    0.79
   5   2  -7    6.40    1.15
   5   2  -7    9.76    1.69
   5   2  -7    9.10    1.56
   5   2  -7    8.64    1.67
   5   2  -6    0.55    0.96
   5   2  -6    1.87    1.13
   5   2  -6    1.75    1.26
   5   2  -6    1.36    1.27
   5   2  -5    3.06    0.94
   5   2  -5    4.23    1.14
   5   2  -5    4.77    1.24
   5   2  -5    3.45    1.22
   5   2  -5    2.24    1.15
  -5  -2   4   10.98    1.38
   5   2  -4   11.18    1.21
   5   2  -4   12.17    1.53
   5   2  -4   12.76    1.53
   5   2  -4   11.82    1.49
   5   2  -4   12.87    1.55
   5   2  -4   11.38    1.23
  -5  -2   3   12.89    1.46
   5   2  -3   16.05    1.46
   5   2  -3   15.34    1.48
   5   2  -3   15.34    1.56
   5   2  -3   15.86    1.52
   5   2  -3   16.37    1.49
   5   2  -3   13.75    1.29
   5   2  -2    5.92    3.30
  -5  -2   2    8.06    1.19
   5   2  -2   12.10    1.22
   5   2  -2    9.22    1.26
   5   2  -2    9.10    1.08
   5   2  -2    8.75    1.21
   5   2  -2    8.63    1.10
   5   2  -2    8.72    1.17
  -5  -2   2    6.23    1.75
   5   2  -2    9.39    1.04
  -5  -2   1    5.48    1.06
   5   2  -1    7.57    1.05
   5   2  -1    7.91    1.13
   5   2  -1    8.32    0.97
   5   2  -1    8.89    1.10
   5   2  -1    7.62    0.93
   5   2  -1    7.88    1.09
  -5  -2   1    4.63    1.64
   5   2  -1    7.01    0.92
   5   2  -1    8.80    1.03
  -5  -2   0   12.70    1.34
   5   2   0   11.29    1.16
   5   2   0   10.32    0.98
  -5  -2   0   10.36    2.08
   5   2   0   12.44    1.23
  -5  -2   0   10.75    1.32
  -5  -2  -1  171.69    8.17
  -5  -2  -1  163.87    8.11
   5   2   1  144.79    7.86
   5   2   1  147.30    8.04
   5   2   1  166.05    8.08
   5   2   1  151.39    8.05
  -5  -2  -2  368.01   16.30
  -5  -2  -2  346.89   16.26
   5   2   2  300.39   15.92
   5   2   2  338.32   16.23
   5   2   2  327.07   16.26
  -5  -2  -3   65.85    3.66
  -5  -2  -3   68.92    3.71
   5   2   3   57.89    6.29
  -5  -2  -3   44.49    4.76
   5   2   3   63.36    3.59
   5   2   3   52.22    3.21
  -5  -2  -3   62.55    3.74
  -5  -2  -4   14.44    1.48
   5   2   4   16.73    1.43
   5   2   4   17.92    3.72
  -5  -2  -4    9.55    2.42
   5   2   4   15.13    1.61
  -5  -2  -4   11.98    1.60
  -5  -2  -5    5.18    1.43
  -5  -2  -5    7.29    1.13
  -5  -2  -5    6.85    1.00
  -5  -2  -5    7.92    1.29
  -5  -2  -5    5.88    1.16
   5   2   5    9.20    1.32
  -5  -2  -5    7.25    1.28
  -5  -2  -6    3.13    1.44
  -5  -2  -6    2.97    1.14
  -5  -2  -6    0.77    1.12
  -5  -2  -6    1.44    0.90
  -5  -2  -6    2.24    0.73
  -5  -2  -6    1.83    1.05
  -5  -2  -7   49.07    3.81
  -5  -2  -7   48.62    3.41
  -5  -2  -7   47.65    3.54
  -5  -2  -7   41.51    3.77
  -5  -2  -7   50.80    3.49
   5   2   7   50.89    3.51
  -5  -2  -8    2.80    1.02
  -5  -2  -8    3.69    1.55
  -5  -2  -8    0.69    1.61
  -5  -2  -8    1.67    1.09
  -5  -2  -8    3.40    1.25
   5   2   8    2.93    1.04
  -5  -2  -9    4.64    0.89
  -5  -2  -9    3.36    1.34
  -5  -2  -9    2.45    1.07
   5   2   9    2.56    0.79
  -5  -2 -10    1.93    0.74
   5   3  -8    2.78    0.63
   5   3  -8    4.57    1.00
   5   3  -8    3.83    0.96
   5   3  -7   79.20    5.02
   5   3  -7   97.78    5.47
   5   3  -7   95.11    5.38
   5   3  -7   91.76    5.43
   5   3  -7   85.87    5.28
   5   3  -6    3.36    1.19
   5   3  -6    2.09    1.29
   5   3  -6    3.14    1.39
   5   3  -5    2.86    1.19
   5   3  -5    2.04    1.21
   5   3  -5    3.56    1.32
   5   3  -5    1.91    1.24
   5   3  -4    0.88    0.62
   5   3  -4    0.28    0.64
   5   3  -4    0.62    0.96
   5   3  -4    1.56    1.07
   5   3  -4    1.13    1.05
   5   3  -4    1.19    1.10
   5   3  -3    4.88    0.99
   5   3  -3    5.56    1.18
   5   3  -3    6.91    1.26
   5   3  -3    6.13    1.17
   5   3  -3    7.60    1.22
   5   3  -3    4.98    0.92
   5   3  -3    6.83    1.19
   5   3  -3    6.06    0.96
   5   3  -2   83.46    8.75
  -5  -3   2   79.51    4.76
   5   3  -2   99.11    5.10
   5   3  -2   94.53    5.07
   5   3  -2   89.30    5.00
   5   3  -2   94.55    5.14
   5   3  -2   92.73    5.06
   5   3  -2   92.61    4.96
   5   3  -2   83.71    4.93
   5   3  -2   95.51    4.99
  -5  -3   2   67.07    4.85
  -5  -3   1    1.61    0.71
   5   3  -1    0.79    2.45
  -5  -3   1    1.66    0.82
   5   3  -1    1.78    0.76
   5   3  -1    0.69    0.80
   5   3  -1    1.76    0.72
   5   3  -1    1.35    0.68
   5   3  -1    1.35    0.80
   5   3  -1    1.17    0.76
  -5  -3   1    0.60    1.04
   5   3  -1    2.03    0.75
   5   3  -1    1.37    0.73
  -5  -3   0   95.24    5.44
  -5  -3   0  101.55    5.43
   5   3   0  104.80    9.09
   5   3   0   96.99    5.38
   5   3   0  106.26    5.41
   5   3   0  102.50    5.41
   5   3   0   94.83    5.22
   5   3   0  111.95    5.56
  -5  -3  -1  158.73    8.31
  -5  -3  -1  167.72    8.32
   5   3   1  154.42   11.62
   5   3   1  172.08    8.45
   5   3   1  154.70    8.16
  -5  -3  -2   78.70    4.27
  -5  -3  -2   77.15    4.25
   5   3   2   66.61    6.99
   5   3   2   74.55    4.31
   5   3   2   64.73    3.93
   5   3   2   79.69    4.36
  -5  -3  -3    7.37    1.10
  -5  -3  -3    6.19    1.03
   5   3   3    6.79    1.05
   5   3   3    6.08    2.66
  -5  -3  -3    7.18    1.06
  -5  -3  -3    4.71    1.64
   5   3   3    6.23    1.06
  -5  -3  -4   21.76    1.99
  -5  -3  -4   27.86    2.06
  -5  -3  -4   26.56    1.97
   5   3   4   24.32    1.92
  -5  -3  -4   20.65    1.69
  -5  -3  -4   22.14    2.12
  -5  -3  -4   17.20    2.87
   5   3   4   23.71    2.08
  -5  -3  -5   11.17    1.36
  -5  -3  -5   10.66    1.42
  -5  -3  -5    9.24    1.52
  -5  -3  -5    8.34    1.70
  -5  -3  -5   10.31    1.19
  -5  -3  -5    8.19    1.41
   5   3   5   11.61    1.44
  -5  -3  -6   10.22    1.30
  -5  -3  -6    8.57    1.24
  -5  -3  -6    8.41    1.37
  -5  -3  -6    7.45    1.59
   5   3   6    7.07    1.35
  -5  -3  -7    7.59    1.41
  -5  -3  -7    5.97    1.68
  -5  -3  -7    7.94    1.31
  -5  -3  -7    7.04    1.16
  -5  -3  -7    8.13    1.42
   5   3   7    6.58    1.28
  -5  -3  -8    7.07    1.59
  -5  -3  -8    8.71    2.26
  -5  -3  -8    7.45    1.69
  -5  -3  -8    2.51    1.53
   5   3   8    6.87    1.35
  -5  -3  -9   -0.92    0.86
  -5  -3  -9    0.05    0.86
  -5  -3  -9   -0.28    0.96
  -5  -3 -10    3.00    0.65
  -5  -3 -10    3.23    0.81
  -5  -3 -10    4.35    0.84
   5   4  -8    1.05    0.69
   5   4  -8    0.90    0.61
   5   4  -8    0.96    0.72
   5   4  -7    8.13    1.17
   5   4  -7    8.49    1.27
   5   4  -6  134.18    7.31
   5   4  -6  132.41    7.47
   5   4  -6  124.03    7.30
   5   4  -6  130.02    7.50
   5   4  -6  141.66    7.49
   5   4  -5  246.88   12.41
   5   4  -5  254.25   12.56
   5   4  -5  236.51   12.42
   5   4  -5  247.68   12.56
   5   4  -5  263.15   12.55
   5   4  -5  211.91   11.82
   5   4  -4   14.55    1.91
   5   4  -4   16.35    1.87
   5   4  -4   12.97    1.89
   5   4  -4   14.99    1.54
   5   4  -3    1.02    0.81
   5   4  -3    0.93    1.04
   5   4  -3    0.06    1.02
   5   4  -3    1.43    1.02
   5   4  -3    0.67    1.08
   5   4  -3    0.23    0.81
   5   4  -2    1.54    0.86
   5   4  -2    0.32    0.88
   5   4  -2    0.83    0.82
   5   4  -2    0.26    0.77
   5   4  -2   -0.20    0.97
   5   4  -2   -0.18    0.74
   5   4  -1  845.51   40.39
   5   4  -1  839.02   40.28
   5   4  -1  859.47   40.34
   5   4  -1  837.90   40.35
   5   4  -1  800.10   40.11
   5   4  -1  899.51   40.36
  -5  -4   0  159.15    8.45
  -5  -4   0  153.88    8.41
   5   4   0  165.13    8.58
   5   4   0  191.45    8.81
   5   4   0  176.89    8.77
   5   4   0  163.84    8.45
   5   4   0  182.87    8.81
  -5  -4  -1    3.91    0.81
   5   4   1    3.61    0.98
   5   4   1    4.53    0.82
  -5  -4  -1    5.20    0.83
   5   4   1    4.52    0.92
   5   4   1    5.05    1.01
  -5  -4  -2   11.02    1.16
  -5  -4  -2   11.32    1.22
  -5  -4  -2    8.96    1.25
   5   4   2    8.96    1.00
   5   4   2   10.93    1.38
   5   4   2   13.11    1.41
   5   4   2   11.21    1.11
  -5  -4  -3   18.62    1.74
   5   4   3   23.13    1.93
   5   4   3   20.60    1.92
  -5  -4  -4  143.69    7.49
  -5  -4  -4  135.89    7.33
  -5  -4  -4  150.81    7.91
   5   4   4  142.02    7.58
   5   4   4  134.59    7.51
  -5  -4  -5   13.02    1.57
  -5  -4  -5   12.17    1.43
   5   4   5   11.12    1.36
  -5  -4  -5   10.24    1.17
  -5  -4  -5   10.89    1.67
   5   4   5   11.18    1.54
  -5  -4  -6    0.92    1.09
  -5  -4  -6   -0.13    0.72
  -5  -4  -6   -0.27    0.89
  -5  -4  -6    0.16    0.90
   5   4   6    0.76    0.93
  -5  -4  -7   11.72    1.72
  -5  -4  -7    9.64    1.38
  -5  -4  -7   10.55    1.53
  -5  -4  -7    9.40    1.51
  -5  -4  -7    7.42    1.25
   5   4   7   12.75    1.49
  -5  -4  -8    2.12    0.95
  -5  -4  -8    4.57    1.25
   5   4   8    3.17    0.91
  -5  -4  -9    4.47    1.05
  -5  -4  -9    3.50    0.93
  -5  -4  -9    4.25    1.02
   5   4  10    6.42    1.15
  -5  -4 -10    9.18    0.97
  -5  -4 -10    7.48    0.97
  -5  -4 -10    7.98    1.01
   5   5  -7   15.31    1.44
   5   5  -7   17.12    1.71
   5   5  -7   16.87    1.71
   5   5  -6   64.54    4.16
   5   5  -6   72.28    4.34
   5   5  -5    2.46    0.76
   5   5  -5    2.49    1.28
   5   5  -5    3.55    1.39
   5   5  -5    4.39    1.48
   5   5  -4   76.84    4.91
   5   5  -4   72.17    5.01
   5   5  -4   70.91    5.02
   5   5  -4   80.45    4.93
   5   5  -4   78.48    4.61
   5   5  -3    5.89    1.26
   5   5  -3    6.13    1.57
   5   5  -3    7.78    1.63
   5   5  -3    6.48    1.49
   5   5  -3    7.14    1.64
   5   5  -3    6.41    1.39
   5   5  -2    3.29    1.03
   5   5  -2    2.47    1.07
   5   5  -2    3.21    1.21
  -5  -5   2    3.22    1.07
   5   5  -2    2.74    1.08
   5   5  -2    2.60    1.24
   5   5  -2    2.08    1.01
   5   5  -1   30.20    2.31
   5   5  -1   27.14    1.96
   5   5  -1   29.54    2.53
   5   5  -1   29.67    2.53
   5   5  -1   31.08    2.23
  -5  -5   1   27.69    2.45
   5   5  -1   26.52    2.35
   5   5   0   18.62    1.70
   5   5   0   18.70    1.62
   5   5   0   20.28    2.05
   5   5   0   18.09    1.95
  -5  -5   0   18.37    2.09
   5   5   0   18.73    1.61
  -5  -5  -1    9.10    1.03
   5   5   1    7.79    1.14
   5   5   1    9.10    1.52
   5   5   1   11.70    1.48
  -5  -5  -1   10.47    1.70
   5   5   1   11.38    1.56
   5   5   1   10.45    1.51
  -5  -5  -2    9.28    1.07
   5   5   2    7.40    1.02
   5   5   2    8.49    1.34
  -5  -5  -2    6.11    1.24
  -5  -5  -2    8.98    1.62
   5   5   2    8.44    1.33
   5   5   3    2.23    0.88
  -5  -5  -3    2.88    0.84
   5   5   3    3.50    1.04
  -5  -5  -3    1.62    0.80
  -5  -5  -3    2.13    0.67
   5   5   3    3.33    1.00
   5   5   4    5.51    1.15
  -5  -5  -4    5.13    1.11
  -5  -5  -4    3.80    0.86
  -5  -5  -4    4.28    0.81
  -5  -5  -4    5.26    1.52
   5   5   4    5.06    1.25
   5   5   5    9.93    1.48
  -5  -5  -5    9.29    1.42
  -5  -5  -5    7.73    1.59
   5   5   5    8.38    1.41
   5   5   6   -0.06    1.10
  -5  -5  -6    0.81    1.15
  -5  -5  -6    0.29    0.98
  -5  -5  -6    0.74    0.80
  -5  -5  -6    0.71    1.04
   5   5   6    1.34    0.93
   5   5   7   14.81    2.07
  -5  -5  -7   24.28    2.15
  -5  -5  -7   22.95    1.95
  -5  -5  -7   17.53    1.70
  -5  -5  -7   18.43    2.01
  -5  -5  -7   20.51    1.93
   5   5   7   19.16    1.83
   5   5   8    5.80    1.46
  -5  -5  -8    7.23    1.34
  -5  -5  -8    5.18    1.01
  -5  -5  -8    6.81    1.16
  -5  -5  -9    6.80    1.02
  -5  -5  -9    7.86    1.11
  -5  -5 -10    7.22    0.87
  -5  -5 -10    6.14    0.80
   5   6  -6    3.13    0.91
   5   6  -6    4.36    1.05
   5   6  -5   21.75    2.07
   5   6  -5   21.09    2.25
   5   6  -5   21.63    2.25
   5   6  -5   20.91    2.12
   5   6  -5   20.05    1.66
   5   6  -4   18.18    1.97
   5   6  -4   17.26    2.19
   5   6  -4   19.39    2.05
   5   6  -4   16.61    1.74
   5   6  -4   17.51    2.19
   5   6  -3    1.22    1.04
   5   6  -3    1.38    0.92
   5   6  -3    2.56    1.19
   5   6  -3    1.49    1.35
   5   6  -3    2.01    1.15
   5   6  -3    1.95    1.49
   5   6  -2   55.20    3.73
   5   6  -2   53.79    3.79
   5   6  -2   55.61    4.06
   5   6  -2   56.61    4.06
   5   6  -2   54.72    3.71
   5   6  -2   54.24    3.77
   5   6  -1    6.91    1.42
   5   6  -1    4.32    0.86
   5   6  -1    5.66    1.21
  -5  -6   1    5.13    1.29
   5   6  -1    5.69    1.15
   5   6  -1    5.74    1.51
   5   6   0    1.41    0.82
   5   6   0    2.07    0.89
   5   6   0    1.74    1.30
  -5  -6   0    1.22    1.12
   5   6   0    2.37    0.85
   5   6   0    1.92    1.31
   5   6   0    2.92    1.20
   5   6   1   36.53    2.82
   5   6   1   27.78    2.25
   5   6   1   32.67    2.46
  -5  -6  -1   33.28    2.82
   5   6   1   34.90    2.69
   5   6   2   34.68    2.81
  -5  -6  -2   28.20    2.56
  -5  -6  -2   35.47    2.91
   5   6   2   34.77    2.64
   5   6   2   31.34    2.31
  -5  -6  -3   27.34    2.09
   5   6   3   30.88    2.63
  -5  -6  -3   26.86    2.30
  -5  -6  -3   31.51    2.80
   5   6   3   28.00    2.49
   5   6   3   32.64    2.34
   5   6   4    7.24    1.29
  -5  -6  -4    7.27    1.18
   5   6   4   10.74    1.52
  -5  -6  -4    6.10    1.12
   5   6   4    7.84    1.39
   5   6   5    4.59    1.26
  -5  -6  -5    4.76    1.12
   5   6   5    6.28    1.23
  -5  -6  -5    2.72    0.78
  -5  -6  -5    4.98    1.49
   5   6   5    5.35    1.19
  -5  -6  -6   85.38    4.76
  -5  -6  -6   74.69    4.40
  -5  -6  -6   88.41    5.06
   5   6   6   68.22    4.56
   5   6   6   79.12    4.95
   5   6   7    6.66    1.43
  -5  -6  -7    6.41    1.27
  -5  -6  -7    5.02    1.30
  -5  -6  -7    5.16    1.27
  -5  -6  -7    5.98    0.99
   5   6   7    4.40    0.96
   5   6   8   11.48    1.63
  -5  -6  -8   13.25    1.53
  -5  -6  -8   11.61    1.25
  -5  -6  -8    9.71    1.47
  -5  -6  -9    2.26    0.81
  -5  -6  -9    1.65    0.61
   5   7  -5    1.80    0.57
   5   7  -5    1.94    0.86
   5   7  -5    2.13    0.93
   5   7  -4    0.37    0.71
   5   7  -4   -0.15    0.88
   5   7  -4   -0.45    1.14
   5   7  -4    0.63    0.98
   5   7  -4   -0.19    1.19
   5   7  -3    2.32    1.06
   5   7  -3    3.60    1.01
   5   7  -3    3.01    1.18
   5   7  -3    2.55    1.39
   5   7  -3    4.09    1.20
   5   7  -3    4.07    1.60
   5   7  -2    0.29    1.09
   5   7  -2    1.63    1.07
   5   7  -2    0.39    1.00
   5   7  -2   -0.84    1.39
   5   7  -2    0.11    1.00
   5   7  -2    0.15    1.43
   5   7  -1    7.91    1.55
   5   7  -1    5.59    1.02
   5   7  -1    7.95    1.33
   5   7  -1    8.51    1.70
  -5  -7   1    7.39    1.27
   5   7  -1    8.13    1.36
   5   7  -1    7.07    1.76
   5   7   0    0.68    0.79
   5   7   0    0.52    0.77
  -5  -7   0   -0.48    1.44
   5   7   0    0.84    0.82
   5   7   0    0.56    1.08
   5   7   1   11.89    1.83
   5   7   1    9.32    1.39
   5   7   1    7.91    1.13
  -5  -7  -1    8.24    1.77
  -5  -7  -1    8.33    1.60
   5   7   1    7.95    1.52
   5   7   2   37.28    3.23
  -5  -7  -2   30.00    2.95
   5   7   2   34.86    2.84
   5   7   2   41.69    3.03
   5   7   2   32.17    2.49
   5   7   3   14.77    2.06
  -5  -7  -3   10.71    1.60
  -5  -7  -3   15.29    2.11
   5   7   3   15.01    1.59
   5   7   3   12.70    1.79
  -5  -7  -4   18.90    1.63
   5   7   4   21.43    2.20
  -5  -7  -4   16.44    1.76
  -5  -7  -4   20.99    2.39
   5   7   4   17.43    1.91
   5   7   4   18.33    1.88
  -5  -7  -5   23.56    2.00
   5   7   5   28.08    2.36
   5   7   5   23.57    2.14
   5   7   5   25.68    2.30
   5   7   6    0.53    1.03
  -5  -7  -6   -0.36    0.86
  -5  -7  -6    1.21    1.12
  -5  -7  -6    0.19    1.18
   5   7   6   -0.63    0.77
   5   7   7    9.96    1.53
  -5  -7  -7   11.79    1.40
  -5  -7  -7    9.94    1.52
  -5  -7  -8   28.84    2.05
  -5  -7  -8   24.91    1.93
   5   7   8   23.76    2.15
  -5  -7  -9   16.26    1.33
   5   7   9   12.03    1.38
   5   8  -4    3.50    0.72
   5   8  -4    4.39    0.90
  -5  -8   4    2.64    1.03
   5   8  -4    4.47    1.01
   5   8  -3    2.24    0.87
   5   8  -3    3.26    0.96
  -5  -8   3    3.95    1.31
   5   8  -3    3.36    1.04
   5   8  -2    2.67    1.02
   5   8  -2    2.43    0.93
  -5  -8   2    1.33    1.38
   5   8  -2    2.47    1.04
   5   8  -1    0.17    1.10
   5   8  -1   -0.20    1.09
   5   8  -1    0.39    0.65
   5   8  -1    0.42    0.86
   5   8  -1    0.71    0.88
   5   8   0   -0.07    1.18
   5   8   0   -0.35    0.76
   5   8   0    0.63    0.70
  -5  -8   0   -0.13    1.43
  -5  -8   0    0.20    0.88
   5   8   0   -0.42    1.17
   5   8   1   10.00    1.77
   5   8   1    7.72    1.30
  -5  -8  -1    6.79    1.54
  -5  -8  -1    9.94    1.58
   5   8   1    7.08    1.48
   5   8   2    6.41    1.10
   5   8   2   16.25    2.10
   5   8   2   12.60    1.59
  -5  -8  -2    8.15    1.63
  -5  -8  -2   12.69    1.79
   5   8   2    9.80    1.64
   5   8   3   37.12    3.05
  -5  -8  -3   30.79    2.64
   5   8   3   33.67    2.73
  -5  -8  -3   41.67    3.09
   5   8   3   32.08    2.66
   5   8   3   30.30    2.40
   5   8   4   80.95    4.59
  -5  -8  -4   77.70    4.62
   5   8   4   63.58    4.07
   5   8   4   60.75    3.98
  -5  -8  -4   54.61    3.86
   5   8   5   28.27    2.34
  -5  -8  -5   21.49    1.86
  -5  -8  -5   28.14    2.35
   5   8   5   20.65    1.94
   5   8   5   26.46    2.18
   5   8   6    6.58    1.25
  -5  -8  -6    6.59    0.97
  -5  -8  -6    5.35    1.25
  -5  -8  -6    5.37    1.37
  -5  -8  -7   17.03    1.45
  -5  -8  -7   14.20    1.69
  -5  -8  -7   18.62    1.80
   5   8   7   14.46    1.65
  -5  -8  -8   78.47    4.14
  -5  -8  -8   76.58    4.20
   5   8   8   72.43    4.33
   5   9  -3    0.65    0.52
   5   9  -3    0.66    0.52
  -5  -9   3    0.61    0.73
   5   9  -2   -0.07    0.64
   5   9  -2   -0.35    0.58
  -5  -9   2   -0.87    0.99
   5   9  -1    5.00    1.10
   5   9  -1    6.50    1.20
   5   9  -1    3.04    0.66
   5   9  -1    4.77    0.87
   5   9   0    1.03    0.96
   5   9   0   -0.18    1.07
   5   9   0    0.10    0.67
  -5  -9  -1   15.45    1.86
   5   9   1   15.77    1.60
  -5  -9  -1   18.68    1.72
   5   9   1   16.00    1.77
   5   9   2   27.74    2.48
   5   9   2   21.03    1.95
  -5  -9  -2   27.16    2.23
  -5  -9  -2   19.92    2.02
   5   9   2   19.62    1.97
   5   9   3   48.43    3.23
  -5  -9  -3   39.16    2.69
   5   9   3   36.39    2.72
  -5  -9  -3   47.26    3.05
   5   9   3   32.67    2.59
   5   9   3   28.08    2.27
   5   9   4   28.20    2.28
  -5  -9  -4   18.35    1.74
  -5  -9  -4   21.27    1.93
  -5  -9  -4   26.69    2.24
   5   9   4   16.99    1.72
   5   9   4   18.64    1.70
   5   9   5    1.06    0.74
   5   9   5    0.10    0.87
  -5  -9  -5   -0.19    0.80
  -5  -9  -5    0.48    0.64
  -5  -9  -5    0.11    1.05
   5   9   6    0.07    0.67
  -5  -9  -6   -0.08    0.68
   5   9   7   10.65    1.24
  -5  -9  -7    9.53    1.18
  -5  -9  -7   12.31    1.27
   5   9   7    9.09    1.09
   5  10  -1   -0.24    0.53
   5  10   0   20.82    1.70
   5  10   0   13.90    1.41
   5  10   1    9.77    1.08
   5  10   1   10.58    1.21
  -5 -10  -2   50.23    2.92
   5  10   2   43.82    2.75
  -5 -10  -2   34.36    2.56
  -5 -10  -2   57.06    2.95
   5  10   2   66.35    3.43
   5  10   2   36.56    2.69
   5  10   3   24.17    1.97
  -5 -10  -3   20.61    1.59
   5  10   3   15.02    1.53
  -5 -10  -3   16.67    1.43
  -5 -10  -3   24.41    1.79
   5  10   3   13.67    1.39
   5  10   4    0.79    0.80
   5  10   4    0.71    0.70
  -5 -10  -4    0.28    0.56
  -5 -10  -4    1.05    0.60
  -5 -10  -4    0.81    0.76
   5  10   5   18.12    1.38
  -5 -10  -5    8.80    0.98
   5  10   5   12.38    1.31
  -5 -10  -5   14.28    1.22
  -5 -10  -5   21.83    1.58
   5  10   5    9.09    1.02
  -5 -10  -6    6.35    0.80
   6  -8  -3   74.53    3.78
   6  -8  -3   60.64    3.65
   6  -8  -2   43.33    2.55
   6  -8  -2   34.61    2.35
   6  -8  -1    2.26    0.69
   6  -8  -1    1.47    0.61
   6  -8   0   13.45    1.18
   6  -8   0    7.45    0.95
   6  -7  -5    4.37    0.87
   6  -7  -5    5.93    0.98
   6  -7  -4   12.07    1.23
   6  -7  -4   13.31    1.46
   6  -7  -3   49.50    3.08
   6  -7  -3   43.79    2.98
   6  -7  -3   45.69    3.07
   6  -7  -2    8.10    1.19
   6  -7  -2    4.84    0.85
   6  -7  -2    7.59    1.17
   6  -7  -2    7.64    1.11
   6  -7  -1   13.49    1.51
   6  -7  -1   11.16    1.23
   6  -7  -1   10.90    1.33
   6  -7  -1   10.57    1.22
   6  -7   0   54.17    3.26
   6  -7   0   46.51    2.98
   6  -7   0   46.12    3.00
  -6   7  -1    5.40    0.79
   6  -7   1    5.18    1.00
   6  -7   1    4.64    0.97
   6  -7   1    4.64    0.85
  -6   7  -2   14.27    1.14
   6  -7   2   13.07    1.25
   6  -7   2   10.36    1.05
  -6   7  -3   -0.31    0.45
   6  -7   3    0.05    0.50
  -6   6   7   43.60    2.82
  -6   6   7   45.01    2.66
   6  -6  -7   43.07    2.69
  -6   6   6   12.37    1.47
   6  -6  -6    9.72    1.07
  -6   6   6   13.59    1.37
   6  -6  -6   13.30    1.32
   6  -6  -6   13.04    1.40
  -6   6   5   83.95    4.90
  -6   6   5   79.45    4.71
   6  -6  -5   78.47    4.70
   6  -6  -5   84.27    4.89
  -6   6   4   51.62    3.43
  -6   6   4   50.72    3.36
   6  -6  -4   48.01    3.19
   6  -6  -4   49.32    3.46
  -6   6   3   51.72    3.54
   6  -6  -3   59.37    3.62
   6  -6  -3   45.56    3.21
  -6   6   3   59.35    3.66
   6  -6  -3   58.36    3.56
   6  -6  -3   57.67    3.75
  -6   6   2   18.54    1.76
   6  -6  -2   20.39    2.07
   6  -6  -2   19.96    1.81
   6  -6  -2   24.54    2.06
   6  -6  -2   20.46    2.06
   6  -6  -1   79.12    4.51
   6  -6  -1   67.38    4.13
   6  -6  -1   68.78    4.15
   6  -6  -1   64.10    4.19
   6  -6   0   61.07    3.79
   6  -6   0   54.01    3.51
   6  -6   0   56.71    3.46
   6  -6   0   50.78    3.37
  -6   6   0   53.57    3.21
   6  -6   1   36.19    2.68
   6  -6   1   32.07    2.52
   6  -6   1   30.90    2.32
  -6   6  -1   36.48    2.34
  -6   6  -2   24.46    1.82
   6  -6   2   24.12    2.01
   6  -6   2   20.60    1.72
  -6   6  -3   -0.03    0.63
   6  -6   3    0.21    0.60
   6  -6   3    0.04    0.73
  -6   6  -3    0.03    0.58
   6  -6   3    0.07    0.48
  -6   6  -4   20.95    1.59
   6  -6   4   18.11    1.55
  -6   6  -4   19.97    1.53
  -6   5   7    0.99    0.76
  -6   5   7    0.21    0.64
   6  -5  -7    0.60    0.64
   6  -5  -7    0.57    0.61
   6  -5  -7    0.62    0.67
  -6   5   6  103.01    6.10
   6  -5  -6   92.97    5.41
  -6   5   6  106.25    5.71
   6  -5  -6   95.99    5.64
   6  -5  -6  113.75    5.88
  -6   5   6  103.48    5.74
  -6   5   5   94.88    5.74
   6  -5  -5   91.52    4.99
   6  -5  -5   80.95    4.91
  -6   5   5   87.05    5.26
  -6   5   4    7.18    1.59
   6  -5  -4    5.72    0.99
  -6   5   4    5.84    1.21
   6  -5  -4    5.96    1.12
  -6   5   4    7.44    1.41
   6  -5  -4    5.07    1.38
  -6   5   3   22.36    2.08
  -6   5   3   27.67    2.57
   6  -5  -3   27.32    2.30
   6  -5  -3   24.34    2.05
  -6   5   3   27.27    2.35
   6  -5  -3   27.38    2.32
   6  -5  -3   28.32    2.50
  -6   5   2  155.10    8.14
   6  -5  -2  151.02    8.04
   6  -5  -2  149.29    7.86
  -6   5   2  165.02    8.13
   6  -5  -2  155.14    7.92
   6  -5  -2  156.96    8.14
  -6   5   1  142.73    8.13
   6  -5  -1  152.71    8.19
   6  -5  -1  159.87    8.15
   6  -5  -1  155.89    8.31
  -6   5   0  411.26   22.06
   6  -5   0  501.17   22.65
   6  -5   0  475.72   22.24
   6  -5   0  456.26   22.36
   6  -5   0  473.27   22.39
  -6   5   0  453.06   21.99
  -6   5  -1    2.90    0.82
   6  -5   1    2.10    1.12
   6  -5   1    3.03    0.98
  -6   5  -2   13.49    1.77
   6  -5   2   19.72    1.91
  -6   5  -2   19.09    1.57
   6  -5   2   16.89    1.57
   6  -5   2   21.31    1.96
  -6   5  -2   19.13    1.66
  -6   5  -3    0.42    1.00
  -6   5  -3    0.65    0.80
   6  -5   3   -0.05    0.93
  -6   5  -3    1.14    0.73
   6  -5   3    0.64    0.57
   6  -5   3    0.82    0.83
  -6   5  -4    5.47    1.34
  -6   5  -4    5.42    1.03
   6  -5   4    5.07    1.08
  -6   5  -4    5.56    1.01
  -6   5  -5    2.73    0.81
  -6   5  -5    1.57    0.76
   6  -5   5    1.62    0.66
  -6   5  -6    6.68    0.87
  -6   5  -6    5.31    0.86
  -6   5  -6    5.35    0.76
   6  -4  -8   21.90    1.62
  -6   4   8   21.00    1.50
   6  -4  -8   16.66    1.48
  -6   4   8   15.69    1.68
  -6   4   7    0.62    1.16
  -6   4   7    0.06    0.98
  -6   4   7   -0.35    0.70
   6  -4  -7    0.24    0.76
   6  -4  -7   -0.83    0.77
   6  -4  -7   -0.04    0.72
  -6   4   6   62.09    4.45
   6  -4  -6   56.78    3.69
  -6   4   6   65.32    3.90
   6  -4  -6   61.29    3.93
   6  -4  -6   69.55    4.08
  -6   4   6   57.26    4.13
   6  -4  -5   24.47    1.97
  -6   4   5   27.78    2.25
   6  -4  -5   31.88    2.52
   6  -4  -5   26.55    1.92
  -6   4   5   24.10    2.43
  -6   4   4    0.85    1.40
   6  -4  -4    0.15    0.71
   6  -4  -4    0.22    0.74
  -6   4   4   -0.39    0.95
   6  -4  -4    0.92    1.11
   6  -4  -4   -0.31    0.65
  -6   4   3    3.37    1.55
   6  -4  -3    4.62    1.13
   6  -4  -3    3.96    1.01
  -6   4   3    4.82    1.28
  -6   4   3    5.89    1.24
   6  -4  -3    5.55    1.32
   6  -4  -3    4.62    1.33
  -6   4   2    3.68    1.35
   6  -4  -2    4.62    1.18
   6  -4  -2    3.18    1.00
  -6   4   2    4.68    1.19
  -6   4   2    3.63    1.17
   6  -4  -2    5.73    1.22
   6  -4  -2    5.41    1.29
  -6   4   1   94.22    5.72
  -6   4   1   97.76    5.98
   6  -4  -1  103.04    5.82
  -6   4   1  107.24    5.93
   6  -4  -1  103.77    5.69
   6  -4  -1  106.79    5.95
  -6   4   0    5.52    1.20
   6  -4   0    4.98    1.33
  -6   4   0    4.77    1.05
   6  -4   0    4.25    1.09
   6  -4   0    4.24    1.15
  -6   4  -1  237.61   12.37
   6  -4   1  284.18   12.84
   6  -4   1  275.71   12.70
   6  -4   1  255.25   12.32
   6  -4   1  258.56   12.52
  -6   4  -1  263.08   12.28
  -6   4  -2   83.45    5.44
   6  -4   2  117.49    6.09
   6  -4   2  124.39    6.11
  -6   4  -2  114.18    5.68
   6  -4   2  100.28    5.58
  -6   4  -2   93.83    5.89
  -6   4  -2  115.09    5.75
  -6   4  -3   26.13    2.09
   6  -4   3   27.21    2.19
   6  -4   3   29.71    2.33
  -6   4  -3   26.70    2.02
   6  -4   3   20.31    1.74
  -6   4  -3   21.90    2.35
  -6   4  -4   17.57    1.71
  -6   4  -4   13.35    2.03
  -6   4  -4   16.47    1.68
   6  -4   4   16.45    1.74
   6  -4   4   17.35    1.57
  -6   4  -5    1.29    1.26
  -6   4  -5    1.04    0.91
   6  -4   5    1.43    0.78
  -6   4  -5    2.62    0.98
  -6   4  -6   22.39    1.73
  -6   4  -6   18.61    1.71
  -6   4  -6   18.42    1.66
  -6   4  -7    4.69    0.88
  -6   4  -7    5.37    0.93
  -6   4  -7    5.82    0.77
  -6   3   8   24.49    2.10
   6  -3  -8   23.32    1.80
  -6   3   8   17.62    1.51
   6  -3  -8   22.90    1.65
   6  -3  -8   21.35    1.69
  -6   3   7   14.34    2.08
   6  -3  -7   16.82    1.65
  -6   3   7   15.45    1.50
   6  -3  -7   16.07    1.47
   6  -3  -7   16.73    1.70
   6  -3  -7   16.59    1.54
   6  -3  -6   25.74    2.10
  -6   3   6   24.37    2.06
   6  -3  -6   23.30    1.87
   6  -3  -6   23.36    2.21
   6  -3  -6   24.96    2.18
   6  -3  -5   15.02    1.59
  -6   3   5   17.14    1.75
   6  -3  -5   18.46    1.95
   6  -3  -5   13.41    1.48
   6  -3  -4    1.97    0.81
   6  -3  -4    2.72    0.92
  -6   3   4    1.04    0.91
   6  -3  -4    2.84    0.84
   6  -3  -3  155.74    8.02
   6  -3  -3  147.80    7.91
  -6   3   3  159.56    8.03
   6  -3  -3  167.47    8.07
   6  -3  -3  165.20    8.26
  -6   3   3  142.85    8.28
  -6   3   2   12.70    2.00
   6  -3  -2   14.24    1.68
   6  -3  -2   13.82    1.60
  -6   3   2   13.57    1.85
  -6   3   2   14.48    1.66
   6  -3  -2   15.87    1.62
   6  -3  -2   14.67    1.78
  -6   3   1    1.62    1.21
   6  -3  -1    0.61    0.86
  -6   3   1    0.67    0.98
  -6   3   1    0.79    0.87
   6  -3  -1    1.84    0.84
   6  -3  -1    1.41    0.98
  -6   3   0  116.90    6.67
  -6   3   0  121.12    6.83
   6  -3   0  134.81    6.86
   6  -3   0  115.04    6.40
   6  -3   0  121.60    6.70
  -6   3  -1  127.29    7.48
  -6   3  -1  146.24    7.70
   6  -3   1  156.76    7.79
   6  -3   1  152.25    7.65
   6  -3   1  138.83    7.32
   6  -3   1  151.84    7.66
  -6   3  -1  132.17    7.21
  -6   3  -2  100.90    5.97
  -6   3  -2  107.74    6.01
   6  -3   2  123.84    6.37
   6  -3   2  119.91    6.23
  -6   3  -2  113.81    5.85
   6  -3   2   98.75    5.72
   6  -3   2  108.92    6.01
  -6   3  -2   97.21    6.16
  -6   3  -2  114.90    5.89
  -6   3  -3  125.98    6.49
  -6   3  -3  108.46    6.25
  -6   3  -3  108.85    6.31
   6  -3   3  129.47    6.67
   6  -3   3  128.37    6.63
  -6   3  -3  123.88    6.43
  -6   3  -3  109.00    6.77
  -6   3  -4   56.69    3.36
  -6   3  -4   41.41    2.98
   6  -3   4   46.90    3.17
  -6   3  -4   52.22    3.29
   6  -3   4   49.75    3.26
  -6   3  -5   25.02    2.04
  -6   3  -5   15.60    1.49
   6  -3   5   19.69    1.78
  -6   3  -5   24.35    2.05
  -6   3  -5   19.50    2.34
  -6   3  -6   33.77    2.43
   6  -3   6   25.53    1.99
  -6   3  -6   31.65    2.50
  -6   3  -7    7.98    1.21
  -6   3  -7    7.42    1.29
  -6   3  -7    7.29    1.12
  -6   2   8    0.70    0.97
   6  -2  -8    2.19    0.76
   6  -2  -8    0.84    0.75
   6  -2  -8    2.41    0.86
  -6   2   7    0.74    1.25
  -6   2   7    1.02    0.66
   6  -2  -7    2.41    0.83
   6  -2  -7    1.24    0.97
   6  -2  -7    0.98    0.66
   6  -2  -7    0.84    0.93
   6  -2  -6   80.89    5.18
   6  -2  -6  105.21    5.58
  -6   2   6   89.43    5.33
   6  -2  -6  107.27    5.53
   6  -2  -6  111.50    5.67
   6  -2  -5  248.65   13.12
   6  -2  -5  267.83   13.20
  -6   2   5  239.73   13.09
   6  -2  -5  271.20   13.15
   6  -2  -5  292.85   13.52
   6  -2  -4    3.36    1.02
  -6   2   4    3.07    0.90
   6  -2  -4    2.85    0.86
   6  -2  -4    3.16    0.80
   6  -2  -4    3.33    1.19
   6  -2  -4    2.28    0.82
   6  -2  -4    3.70    1.15
  -6   2   3   33.01    3.03
   6  -2  -3   34.20    2.49
   6  -2  -3   34.52    2.55
   6  -2  -3   29.36    2.16
  -6   2   3   33.28    2.42
   6  -2  -3   40.10    2.63
  -6   2   3   26.83    2.84
   6  -2  -2   34.84    2.55
   6  -2  -2   32.27    2.50
  -6   2   2   33.02    2.42
   6  -2  -2   35.05    2.49
   6  -2  -2   36.51    2.73
  -6   2   1    0.49    1.10
  -6   2   1    2.63    1.18
  -6   2   1    0.86    0.73
   6  -2  -1    1.64    0.75
   6  -2  -1    1.01    0.90
  -6   2   0   43.93    3.10
  -6   2   0   40.95    3.09
   6  -2   0   39.77    2.92
   6  -2   0   47.64    2.91
   6  -2   0   42.86    2.66
   6  -2   0   40.99    2.92
   6  -2   0   38.35    2.62
  -6   2  -1    3.49    1.12
   6  -2   1    5.60    1.08
   6  -2   1    5.39    1.05
  -6   2  -1    5.31    1.16
   6  -2   1    4.58    0.79
   6  -2   1    4.66    1.00
  -6   2  -2   35.94    2.35
  -6   2  -2   38.61    2.72
  -6   2  -2   34.72    2.67
   6  -2   2   38.52    2.69
   6  -2   2   39.72    2.84
  -6   2  -2   35.01    2.37
   6  -2   2   32.44    2.22
   6  -2   2   37.23    2.64
  -6   2  -2   34.51    2.78
  -6   2  -3 1298.92   61.22
  -6   2  -3 1259.24   61.33
  -6   2  -3 1288.87   61.38
   6  -2   3 1359.93   61.46
  -6   2  -3 1255.09   61.24
   6  -2   3 1349.10   61.40
  -6   2  -3 1265.25   61.63
  -6   2  -4   61.27    3.76
  -6   2  -4   55.11    3.57
  -6   2  -4   61.28    3.74
   6  -2   4   58.24    3.66
  -6   2  -4   60.56    3.77
   6  -2   4   60.40    3.69
  -6   2  -5    0.55    1.50
  -6   2  -5    0.54    0.90
   6  -2   5    0.54    0.75
  -6   2  -5   -1.11    1.09
  -6   2  -5   -0.18    0.73
  -6   2  -6    0.05    0.95
   6  -2   6    0.48    0.61
  -6   2  -6   -0.33    1.09
  -6   2  -6   -0.12    0.70
  -6   2  -7    3.99    1.08
  -6   2  -7    3.25    1.16
  -6   2  -7    2.03    0.67
  -6   2  -8    1.89    0.84
  -6   2  -8    1.97    1.03
   6  -2   8    1.81    0.80
   6  -1  -9   10.28    1.03
   6  -1  -9    9.65    1.09
   6  -1  -9    8.52    1.03
  -6   1   8    8.25    1.23
   6  -1  -8    9.48    1.26
   6  -1  -8    8.32    1.23
   6  -1  -8   10.33    1.30
  -6   1   7   45.92    3.54
   6  -1  -7   51.60    3.36
   6  -1  -7   51.55    3.33
   6  -1  -7   45.21    3.31
  -6   1   6  595.65   28.42
   6  -1  -6  613.67   27.96
   6  -1  -6  627.73   28.01
   6  -1  -6  574.70   27.83
   6  -1  -5  292.59   15.16
   6  -1  -5  307.34   15.21
  -6   1   5  252.64   14.88
   6  -1  -5  312.74   15.23
   6  -1  -5  372.28   15.62
   6  -1  -5  341.45   15.42
   6  -1  -4  151.25    8.15
   6  -1  -4  147.56    8.12
  -6   1   4  146.14    8.08
   6  -1  -4  165.77    8.40
   6  -1  -4  152.85    8.18
   6  -1  -4  180.30    8.49
   6  -1  -4  164.41    8.47
  -6   1   3    0.34    1.25
   6  -1  -3   -0.58    0.88
  -6   1   3   -0.15    0.64
   6  -1  -3    0.15    0.59
   6  -1  -3   -0.18    0.85
   6  -1  -3    0.56    0.64
   6  -1  -3    0.53    0.89
   6  -1  -3    1.57    0.77
  -6   1   2    3.51    1.38
   6  -1  -2    4.06    0.91
   6  -1  -2    3.73    0.98
  -6   1   2    3.12    0.81
   6  -1  -2    3.97    0.92
   6  -1  -2    3.96    1.08
  -6   1   1   70.16    4.29
   6  -1  -1   66.25    3.95
  -6   1   1   63.34    3.79
   6  -1  -1   67.78    3.80
   6  -1  -1   61.79    3.99
   6  -1   0    4.34    0.96
  -6   1   0    4.75    1.22
   6  -1   0    5.36    1.06
   6  -1   0    5.60    0.84
   6  -1   0    3.63    1.03
   6  -1   0    5.28    0.85
  -6   1  -1   13.55    1.64
  -6   1  -1   13.20    1.64
   6  -1   1   12.20    1.41
   6  -1   1   13.65    1.38
   6  -1   1   10.53    1.07
   6  -1   1   14.05    1.48
  -6   1  -2   36.62    2.50
  -6   1  -2   43.95    3.00
  -6   1  -2   44.06    3.01
   6  -1   2   43.33    2.90
   6  -1   2   42.60    2.77
   6  -1   2   43.72    2.86
  -6   1  -3   34.89    2.49
  -6   1  -3   38.24    2.86
  -6   1  -3   40.18    2.84
   6  -1   3   41.44    2.76
   6  -1   3   41.45    2.66
  -6   1  -3   39.67    2.64
   6  -1   3   40.10    2.67
  -6   1  -4   12.86    1.47
  -6   1  -4   12.95    1.52
  -6   1  -4   13.75    1.65
   6  -1   4   10.87    1.34
   6  -1   4   14.17    1.47
  -6   1  -4   15.38    1.63
  -6   1  -5   35.79    2.73
  -6   1  -5   37.48    2.62
  -6   1  -5   39.79    2.82
   6  -1   5   33.19    2.44
  -6   1  -5   42.39    2.97
  -6   1  -6   21.33    2.02
  -6   1  -6   14.97    1.52
  -6   1  -6   18.74    1.82
  -6   1  -6   20.04    2.14
  -6   1  -7    6.32    1.38
  -6   1  -7    8.91    1.59
  -6   1  -7    8.23    1.42
  -6   1  -7    7.11    1.16
  -6   1  -8    1.60    1.00
  -6   1  -8    2.23    1.23
  -6   1  -8    3.04    0.96
  -6   1  -8    2.12    0.66
   6  -1   8    1.07    0.85
  -6   1  -9    0.58    0.74
   6  -1   9    0.85    0.54
   6   0  -8   37.88    2.56
   6   0  -8   34.63    2.50
   6   0  -8   35.91    2.58
   6   0  -8   27.79    2.34
  -6   0   7  114.27    6.63
   6   0  -7   97.52    6.24
   6   0  -7  148.67    6.89
   6   0  -7  144.67    6.90
   6   0  -7  123.66    6.77
  -6   0   6  186.32   10.28
   6   0  -6  187.89    9.97
   6   0  -6  221.37   10.21
   6   0  -6  222.07   10.29
   6   0  -6  166.07    9.71
  -6   0   5  971.16   49.75
   6   0  -5 1008.20   49.49
   6   0  -5 1035.84   49.42
   6   0  -5 1016.94   49.48
   6   0  -5 1193.48   49.75
   6   0  -5 1021.89   49.43
  -6   0   4  119.49    7.27
   6   0  -4  121.48    6.79
   6   0  -4  126.92    7.02
   6   0  -4  128.41    6.94
   6   0  -4  147.85    7.19
   6   0  -4  133.12    7.06
   6   0  -4  120.83    6.80
  -6   0   3   11.47    1.69
   6   0  -3   10.37    1.28
   6   0  -3    8.72    1.38
   6   0  -3    9.50    1.21
   6   0  -3   10.34    1.37
   6   0  -3    8.48    1.32
   6   0  -3    7.82    1.10
  -6   0   2   14.85    1.93
   6   0  -2   19.56    1.69
   6   0  -2   15.82    1.34
  -6   0   2   14.06    1.29
   6   0  -2   15.54    1.46
   6   0  -2   18.22    1.59
  -6   0   2   17.17    2.04
  -6   0   1   14.63    1.81
   6   0  -1   14.25    1.49
   6   0  -1   12.13    1.45
  -6   0   1   11.77    1.17
   6   0  -1   15.55    1.37
   6   0  -1   16.61    1.38
   6   0  -1   13.98    1.56
   6   0  -1   14.27    1.28
  -6   0   1   15.77    1.85
  -6   0   0  452.54   20.40
  -6   0   0  455.25   20.31
   6   0   0  421.09   20.07
   6   0   0  431.16   19.99
   6   0   0  364.32   19.68
   6   0   0  427.18   20.13
   6   0   0  386.51   19.87
   6   0   1    0.47    0.74
   6   0   1    0.22    0.64
  -6   0  -1   -0.59    0.98
   6   0   1   -0.17    0.49
   6   0   1   -0.22    0.74
  -6   0  -2   40.50    2.94
   6   0   2   42.20    2.85
   6   0   2   41.93    2.65
   6   0   2   40.69    2.82
  -6   0  -3    1.70    0.95
  -6   0  -3    0.95    0.63
   6   0   3    1.19    0.79
   6   0   3    1.61    0.69
  -6   0  -3    0.67    0.69
   6   0   3    2.42    0.84
  -6   0  -4    1.37    0.95
  -6   0  -4    0.90    0.78
   6   0   4    0.97    0.64
  -6   0  -4    0.43    0.86
   6   0   4    1.49    0.76
  -6   0  -5   51.43    3.52
  -6   0  -5   57.94    3.57
  -6   0  -5   55.96    3.64
   6   0   5   48.86    3.13
  -6   0  -5   55.98    3.71
  -6   0  -6   26.51    2.43
  -6   0  -6   25.97    2.17
  -6   0  -6   28.79    2.39
  -6   0  -6   27.41    2.56
  -6   0  -6   26.11    2.46
  -6   0  -7    3.85    0.90
  -6   0  -7    5.56    1.42
  -6   0  -7    4.96    1.66
  -6   0  -7    5.20    1.34
  -6   0  -7    4.81    1.16
  -6   0  -8    6.04    1.33
  -6   0  -8    4.32    1.44
  -6   0  -8    6.41    1.20
  -6   0  -8    5.04    1.02
  -6   0  -9    2.63    1.05
  -6   0  -9    5.30    0.91
  -6   0  -9    4.50    0.75
   6   0   9    4.25    0.86
   6   1  -8    9.13    1.22
   6   1  -8    7.85    1.19
   6   1  -8    6.19    1.08
   6   1  -8    8.34    1.21
   6   1  -7    6.53    1.06
   6   1  -7    9.09    1.42
   6   1  -7    9.13    1.46
   6   1  -7    7.05    1.37
  -6  -1   6   -0.05    0.89
   6   1  -6   -0.16    0.86
   6   1  -6    1.06    1.07
   6   1  -6    0.50    1.06
  -6  -1   5    1.38    1.11
   6   1  -5    0.79    0.97
   6   1  -5    1.25    1.08
   6   1  -5    0.34    1.12
   6   1  -5    1.09    0.79
   6   1  -5    0.79    1.04
  -6  -1   4   77.35    5.23
   6   1  -4   87.41    5.20
   6   1  -4   96.21    5.14
   6   1  -4   80.88    4.90
   6   1  -4   87.06    5.19
   6   1  -4   98.41    5.30
   6   1  -4   86.14    5.07
  -6  -1   3  237.80   12.41
   6   1  -3  234.21   12.19
   6   1  -3  223.15   12.02
   6   1  -3  257.61   12.31
   6   1  -3  251.04   12.24
   6   1  -3  252.10   12.33
  -6  -1   2    3.90    1.15
   6   1  -2    4.25    0.94
  -6  -1   2    3.06    1.19
   6   1  -2    2.93    0.99
   6   1  -2    3.72    0.90
   6   1  -2    3.33    0.86
   6   1  -2    2.31    0.90
   6   1  -2    2.29    0.70
  -6  -1   1    0.20    0.95
   6   1  -1    0.35    0.77
   6   1  -1    0.70    0.77
  -6  -1   1    1.44    0.99
   6   1  -1    1.02    0.71
   6   1  -1    0.13    0.59
   6   1  -1    0.28    0.56
  -6  -1   0   27.92    2.30
  -6  -1   0   27.28    2.30
   6   1   0   26.49    2.12
   6   1   0   27.56    2.05
   6   1   0   24.71    1.79
   6   1   0   28.04    2.20
   6   1   0   28.37    2.02
  -6  -1  -1  312.41   15.71
  -6  -1  -1  310.23   15.67
   6   1   1  306.17   15.56
   6   1   1  309.69   15.35
   6   1   1  319.10   15.60
   6   1   1  326.61   15.55
  -6  -1  -2  231.55   10.60
  -6  -1  -2  204.73   10.52
   6   1   2  197.25   10.40
   6   1   2  190.28   10.13
   6   1   2  196.68   10.42
   6   1   2  209.51   10.45
  -6  -1  -3    6.03    0.94
   6   1   3    8.00    1.16
   6   1   3    6.86    0.94
  -6  -1  -3    7.39    1.18
   6   1   3    8.27    1.19
  -6  -1  -4   -0.10    0.90
  -6  -1  -4    0.57    0.75
   6   1   4    0.66    0.74
   6   1   4    0.15    0.54
  -6  -1  -4    0.35    0.94
  -6  -1  -4    1.13    1.03
  -6  -1  -5   10.15    1.48
  -6  -1  -5    7.99    1.39
  -6  -1  -5    7.94    1.56
  -6  -1  -6    1.24    1.23
  -6  -1  -6    3.27    1.57
  -6  -1  -6    0.60    1.63
  -6  -1  -6    0.16    1.32
   6   1   6    1.53    1.48
  -6  -1  -7    2.12    0.98
  -6  -1  -7    2.28    1.34
  -6  -1  -7    1.85    1.59
  -6  -1  -7    2.31    1.16
  -6  -1  -8   24.12    2.36
  -6  -1  -8   22.09    1.85
  -6  -1  -8   26.77    2.18
  -6  -1  -8   20.45    2.51
  -6  -1  -8   26.33    2.21
   6   1   8   23.31    2.13
  -6  -1  -9    0.11    1.06
  -6  -1  -9    0.19    0.71
  -6  -1  -9   -0.31    0.61
   6   1   9    0.45    0.59
  -6  -1  -9   -0.19    0.96
   6   2  -8   49.11    3.05
   6   2  -8   46.84    3.01
   6   2  -8   50.71    3.10
   6   2  -8   39.23    2.83
   6   2  -7   19.32    1.72
   6   2  -7   24.04    2.09
   6   2  -7   24.90    2.11
   6   2  -7   22.69    2.07
   6   2  -6    0.59    0.97
   6   2  -6    0.92    1.13
   6   2  -6   -0.49    1.24
   6   2  -6   -0.18    1.14
   6   2  -6    0.92    1.19
   6   2  -5    2.68    1.18
   6   2  -5    1.59    1.16
   6   2  -5    1.83    1.11
   6   2  -5    3.60    1.30
   6   2  -5    1.81    1.12
  -6  -2   4   10.53    1.48
   6   2  -4   13.94    1.78
   6   2  -4   13.16    1.67
   6   2  -4   15.29    1.80
   6   2  -4   14.11    1.68
   6   2  -4   16.01    1.79
   6   2  -4   12.54    1.38
   6   2  -4   10.80    1.39
  -6  -2   3  238.53   12.49
   6   2  -3  255.14   12.52
   6   2  -3  254.07   12.46
   6   2  -3  258.76   12.68
   6   2  -3  247.93   12.54
   6   2  -3  264.42   12.53
   6   2  -3  237.81   12.49
  -6  -2   3  211.48   12.61
  -6  -2   2   19.41    1.90
   6   2  -2   24.29    1.98
   6   2  -2   23.12    2.01
   6   2  -2   20.42    1.77
   6   2  -2   21.29    1.95
   6   2  -2   21.21    1.82
   6   2  -2   21.15    1.80
   6   2  -2   19.37    1.89
   6   2  -2   22.35    1.73
  -6  -2   1   87.42    5.08
   6   2  -1   92.84    5.09
   6   2  -1   91.33    5.05
   6   2  -1   90.88    4.82
   6   2  -1   91.42    5.04
   6   2  -1   81.47    4.74
   6   2  -1   77.74    4.74
   6   2  -1   89.54    5.09
   6   2  -1   89.45    4.92
  -6  -2   1   91.47    5.22
  -6  -2   0   10.98    1.43
   6   2   0   10.55    1.23
  -6  -2   0   10.72    1.38
   6   2   0    9.53    1.01
   6   2   0    8.72    1.29
   6   2   0   10.58    1.25
  -6  -2  -1  128.66    6.87
  -6  -2  -1  118.96    6.79
   6   2   1  121.88    6.76
   6   2   1  114.07    6.50
  -6  -2  -2    2.32    0.99
   6   2   2    3.45    0.90
   6   2   2    2.78    0.73
  -6  -2  -2    2.46    0.94
   6   2   2    3.13    0.98
   6   2   2    2.97    0.94
  -6  -2  -3   40.71    2.89
  -6  -2  -3   55.28    3.33
  -6  -2  -3   59.75    3.36
   6   2   3   50.58    3.21
   6   2   3   44.26    2.82
  -6  -2  -3   42.63    3.19
   6   2   4    8.50    1.21
  -6  -2  -4    6.85    1.41
  -6  -2  -4    7.71    1.22
   6   2   4   11.05    1.45
  -6  -2  -5   11.53    1.58
  -6  -2  -5    9.57    1.48
   6   2   5   10.37    1.25
  -6  -2  -5    9.93    1.78
  -6  -2  -5   10.76    1.34
  -6  -2  -5    8.74    1.09
  -6  -2  -5    9.02    1.46
   6   2   5   13.12    1.67
  -6  -2  -6   19.54    2.28
  -6  -2  -6   21.63    2.18
  -6  -2  -6   19.97    2.28
  -6  -2  -6   24.41    2.69
  -6  -2  -6   22.94    2.12
  -6  -2  -6   17.52    1.66
   6   2   6   28.23    2.46
  -6  -2  -7   16.81    1.84
  -6  -2  -7   17.09    2.03
  -6  -2  -7   13.10    2.09
  -6  -2  -7   15.27    2.40
  -6  -2  -7   15.92    1.85
   6   2   7   14.70    1.92
  -6  -2  -8   24.20    2.59
  -6  -2  -8   31.82    2.33
  -6  -2  -8   31.01    2.48
  -6  -2  -8   28.58    2.92
  -6  -2  -8   33.18    2.45
   6   2   8   30.97    2.44
  -6  -2  -9    2.10    0.67
  -6  -2  -9    3.00    0.85
   6   2   9    2.94    0.76
   6   3  -8   14.45    1.34
   6   3  -8   12.50    1.33
   6   3  -8   10.30    1.18
   6   3  -7   -0.08    0.67
   6   3  -7   -0.05    0.89
   6   3  -7    0.39    0.94
   6   3  -6   45.93    3.34
   6   3  -6   51.05    3.57
   6   3  -6   50.41    3.57
   6   3  -6   50.60    3.60
   6   3  -6   54.42    3.58
   6   3  -5    9.86    1.53
   6   3  -5    8.51    1.58
   6   3  -5    8.28    1.58
   6   3  -5    9.34    1.65
   6   3  -5    7.67    1.54
   6   3  -4   13.19    1.83
   6   3  -4   14.51    1.79
   6   3  -4   12.96    1.74
   6   3  -4   12.28    1.72
   6   3  -3    3.84    1.02
   6   3  -3    5.05    1.24
   6   3  -3    2.34    1.18
   6   3  -3    3.21    1.13
   6   3  -3    4.21    1.16
   6   3  -3    3.06    0.93
   6   3  -3    3.15    1.10
   6   3  -3    2.43    0.79
  -6  -3   2  162.63    9.37
   6   3  -2  199.95    9.74
   6   3  -2  206.13    9.80
   6   3  -2  193.49    9.59
   6   3  -2  195.09    9.78
   6   3  -2  189.05    9.63
   6   3  -2  182.00    9.53
   6   3  -2  172.96    9.57
   6   3  -2  190.25    9.51
  -6  -3   2  164.15    9.55
  -6  -3   1  131.37    7.55
  -6  -3   1  137.90    7.46
   6   3  -1  151.73    7.76
   6   3  -1  144.60    7.50
   6   3  -1  159.11    7.63
   6   3  -1  145.90    7.52
   6   3  -1  131.83    7.34
   6   3  -1  134.93    7.63
   6   3  -1  146.49    7.58
  -6  -3   0    5.00    0.99
   6   3   0    4.64    0.98
  -6  -3   0    5.01    1.07
   6   3   0    4.98    0.87
   6   3   0    3.74    0.77
   6   3   0    6.19    0.96
   6   3   0    6.98    1.09
  -6  -3  -1    6.83    1.12
   6   3   1    6.29    1.18
   6   3   1    5.94    0.94
  -6  -3  -1    6.24    1.09
   6   3   1    5.20    1.15
   6   3   1    6.78    1.13
  -6  -3  -2   30.48    2.25
  -6  -3  -2   28.50    2.24
   6   3   2   23.57    1.89
   6   3   2   26.99    2.29
  -6  -3  -3   37.92    2.78
  -6  -3  -3   40.73    2.90
   6   3   3   42.34    2.90
   6   3   3   41.99    2.92
  -6  -3  -4    4.99    1.24
  -6  -3  -4    2.95    1.04
   6   3   4    4.91    1.05
  -6  -3  -4    3.88    0.77
  -6  -3  -4    3.72    1.09
   6   3   4    4.88    1.17
  -6  -3  -5   30.60    2.61
  -6  -3  -5   35.45    2.68
  -6  -3  -5   37.61    2.68
   6   3   5   31.07    2.41
  -6  -3  -5   25.60    2.77
  -6  -3  -5   32.90    2.32
  -6  -3  -5   34.11    2.43
  -6  -3  -5   29.92    2.69
   6   3   5   32.98    2.71
  -6  -3  -6   18.72    2.29
  -6  -3  -6   22.71    2.17
  -6  -3  -6   17.79    2.47
  -6  -3  -6   24.91    1.97
  -6  -3  -6   19.58    1.82
   6   3   6   24.80    2.25
  -6  -3  -7   34.73    3.26
  -6  -3  -7   47.63    3.22
  -6  -3  -7   44.49    3.18
  -6  -3  -7   41.42    2.96
   6   3   7   46.45    3.22
  -6  -3  -8   -0.05    0.87
  -6  -3  -8    0.92    0.83
  -6  -3  -8    0.40    0.98
   6   3   8    0.15    0.82
  -6  -3  -9    2.16    0.76
  -6  -3  -9    1.17    1.10
  -6  -3  -9    3.02    0.82
  -6  -3  -9    3.16    0.92
   6   4  -7    0.20    0.58
   6   4  -7   -0.78    0.83
   6   4  -7   -0.35    0.83
   6   4  -6    2.25    0.95
   6   4  -6    1.10    1.02
   6   4  -6    1.63    1.10
   6   4  -6    0.88    1.08
   6   4  -5    4.18    1.32
   6   4  -5    4.58    1.29
   6   4  -5    3.80    1.32
   6   4  -4    6.23    1.07
   6   4  -4    8.48    1.59
   6   4  -4    8.95    1.68
   6   4  -4   10.66    1.64
   6   4  -4   11.10    1.63
   6   4  -4    9.29    1.59
   6   4  -3    0.18    1.10
   6   4  -3   -0.13    1.18
   6   4  -3    0.24    1.08
   6   4  -3    0.81    1.01
   6   4  -3    0.06    1.06
   6   4  -3    0.23    0.79
   6   4  -2   39.03    2.85
   6   4  -2   38.43    2.85
   6   4  -2   34.58    2.75
   6   4  -2   38.46    2.86
   6   4  -2   34.50    2.62
   6   4  -2   33.90    2.64
  -6  -4   1   16.79    1.75
  -6  -4   1   18.77    1.67
   6   4  -1   21.61    2.17
   6   4  -1   22.34    2.07
   6   4  -1   21.70    2.05
   6   4  -1   22.79    2.08
   6   4  -1   21.12    1.88
   6   4  -1   22.45    2.10
  -6  -4   0    5.04    0.93
   6   4   0    4.05    0.97
  -6  -4   0    3.51    0.89
   6   4   0    5.12    1.02
   6   4   0    3.89    0.80
   6   4   0    4.73    1.07
   6   4   0    4.20    1.13
  -6  -4  -1    0.61    0.77
   6   4   1    1.50    0.98
   6   4   1    0.81    0.70
  -6  -4  -1    0.51    0.68
  -6  -4  -2    2.00    0.86
   6   4   2    1.33    0.91
   6   4   2    1.57    0.62
  -6  -4  -2    1.01    0.73
   6   4   2    1.54    0.99
   6   4   3    8.11    1.14
  -6  -4  -3   11.96    1.45
  -6  -4  -3   12.73    1.37
   6   4   3   12.31    1.56
   6   4   3   12.09    1.59
  -6  -4  -4   26.64    2.19
  -6  -4  -4   24.95    2.06
   6   4   4   25.23    2.19
  -6  -4  -4   22.55    2.42
   6   4   4   25.25    2.28
  -6  -4  -5   83.23    4.77
  -6  -4  -5   74.84    4.60
   6   4   5   70.43    4.56
  -6  -4  -5   70.85    4.87
   6   4   5   87.44    4.95
  -6  -4  -6   77.61    4.73
  -6  -4  -6   70.96    4.40
  -6  -4  -6   72.53    4.62
   6   4   6   82.70    4.88
  -6  -4  -7   30.32    2.37
  -6  -4  -7   24.28    2.05
  -6  -4  -7   24.15    2.12
   6   4   7   25.78    2.29
  -6  -4  -8    2.71    0.84
  -6  -4  -8    1.99    0.93
   6   4   8    2.33    0.85
   6   4   9    4.43    1.13
  -6  -4  -9    5.85    1.02
  -6  -4  -9    5.01    0.88
  -6  -4  -9    4.42    0.95
   6   5  -7    3.36    0.79
   6   5  -7    2.32    0.77
   6   5  -6    2.25    0.83
   6   5  -6    1.84    0.98
   6   5  -6    2.73    1.00
   6   5  -6    2.07    1.03
   6   5  -5   27.50    2.59
   6   5  -5   28.39    2.58
   6   5  -5   30.99    2.52
   6   5  -4   15.15    1.93
   6   5  -4   17.89    2.14
   6   5  -4   18.62    2.10
   6   5  -4   19.03    2.06
   6   5  -4   13.04    1.53
   6   5  -3    6.04    1.21
   6   5  -3    5.84    1.22
   6   5  -3    5.95    1.44
   6   5  -3    5.66    1.49
   6   5  -3    6.93    1.42
   6   5  -3    9.27    1.65
   6   5  -2    0.23    1.02
   6   5  -2    1.28    1.03
   6   5  -2   -0.26    1.10
  -6  -5   2    0.18    1.03
   6   5  -2    0.15    0.91
   6   5  -2   -0.06    1.14
   6   5  -2    0.33    0.91
   6   5  -1   -0.25    1.01
   6   5  -1   -0.11    0.93
   6   5  -1    0.87    1.03
  -6  -5   1   -0.78    1.19
   6   5  -1    0.45    0.81
   6   5  -1    0.24    1.09
   6   5  -1   -0.06    0.90
   6   5   0   14.56    1.66
   6   5   0   15.80    1.95
   6   5   0   16.94    1.92
  -6  -5  -1    1.07    0.71
  -6  -5  -1    0.77    1.43
   6   5   1    1.89    1.21
  -6  -5  -2    3.00    0.90
   6   5   2    1.50    1.16
  -6  -5  -2    2.89    0.96
  -6  -5  -2    3.23    1.53
   6   5   2    3.83    1.18
  -6  -5  -3   37.89    2.64
  -6  -5  -3   33.18    2.43
   6   5   3   40.23    3.02
   6   5   3   38.60    2.93
   6   5   3   37.57    2.52
  -6  -5  -4   48.97    3.22
  -6  -5  -4   42.03    2.93
   6   5   4   50.13    3.42
  -6  -5  -4   42.52    3.58
   6   5   4   51.01    3.42
   6   5   4   43.57    3.06
  -6  -5  -5  134.99    6.89
  -6  -5  -5  116.39    6.57
   6   5   5  123.04    6.83
  -6  -5  -5  115.94    7.08
   6   5   5  122.08    6.91
  -6  -5  -6   97.34    5.40
  -6  -5  -6   88.59    5.09
  -6  -5  -6   80.03    5.22
  -6  -5  -6   81.78    5.36
   6   5   6   94.68    5.38
   6   5   7    2.79    1.16
  -6  -5  -7    3.67    1.18
  -6  -5  -7    3.96    1.07
  -6  -5  -7    4.67    1.03
  -6  -5  -7    1.93    0.91
   6   5   7    4.77    1.07
   6   5   8    1.37    1.01
  -6  -5  -8    0.84    0.92
  -6  -5  -8    1.45    0.81
   6   5   8    1.22    0.71
   6   5   9    2.82    0.89
  -6  -5  -9    2.89    0.74
   6   6  -6    0.50    0.62
   6   6  -6    0.53    0.74
   6   6  -6    1.30    0.71
   6   6  -6   -0.28    0.77
   6   6  -5   15.94    1.65
   6   6  -5   15.65    1.86
   6   6  -5   16.26    1.84
   6   6  -5   16.31    1.69
   6   6  -4   51.20    3.31
   6   6  -4   45.09    3.45
   6   6  -4   44.80    3.41
   6   6  -4   47.25    3.25
   6   6  -4   41.18    2.92
   6   6  -3   37.07    2.87
   6   6  -3   41.49    3.17
   6   6  -3   42.18    3.38
   6   6  -3   42.45    3.39
   6   6  -3   45.13    3.11
   6   6  -3   37.46    2.87
   6   6  -2    4.15    1.24
   6   6  -2    5.12    1.29
   6   6  -2    5.20    1.46
   6   6  -2    4.93    1.20
   6   6  -2    5.05    1.53
   6   6  -2    4.89    1.22
   6   6  -1    0.16    0.94
   6   6  -1   -0.42    1.13
  -6  -6   1   -0.49    1.00
   6   6  -1   -0.14    0.83
   6   6  -1   -0.34    1.28
   6   6  -1    1.02    1.03
   6   6   0    0.14    0.64
   6   6   0    0.39    0.89
   6   6   0    0.13    1.12
  -6  -6   0    0.74    1.26
   6   6   0    0.71    1.15
   6   6   1   70.49    4.44
   6   6   1   54.11    3.64
   6   6   1   57.15    3.72
  -6  -6  -1   66.01    4.45
   6   6   1   70.68    4.29
  -6  -6  -2   19.75    1.62
  -6  -6  -2   15.53    1.90
  -6  -6  -2   18.92    2.40
   6   6   2   19.60    2.11
  -6  -6  -3   92.32    5.14
   6   6   3  107.00    5.82
  -6  -6  -3   84.48    5.10
   6   6   3  110.52    5.74
   6   6   3   82.01    5.05
  -6  -6  -4  146.57    8.12
   6   6   4  156.66    8.53
   6   6   4  165.23    8.50
   6   6   4  150.29    8.13
  -6  -6  -5  139.80    7.27
  -6  -6  -5  115.63    6.85
   6   6   5  139.54    7.44
   6   6   5  141.09    7.41
   6   6   5  137.52    7.30
  -6  -6  -6   24.45    2.10
  -6  -6  -6   23.46    1.82
  -6  -6  -6   20.16    2.11
  -6  -6  -6   22.42    2.30
   6   6   6   21.84    2.03
   6   6   6   23.60    2.14
   6   6   7    8.84    1.42
  -6  -6  -7   10.40    1.41
  -6  -6  -7    7.48    1.33
  -6  -6  -7    8.99    1.36
  -6  -6  -7    8.51    1.10
   6   6   7    7.22    1.18
   6   6   8    6.17    1.19
  -6  -6  -8    6.86    0.95
   6   6   9   -0.24    0.63
  -6  -6  -9    0.12    0.56
  -6  -6  -9    0.31    0.43
   6   7  -5    1.03    0.63
   6   7  -5    0.98    0.67
   6   7  -4   15.12    1.52
   6   7  -4   12.41    1.65
   6   7  -4   13.94    1.50
   6   7  -4   11.59    1.21
   6   7  -4   11.57    1.66
   6   7  -3    5.56    1.09
   6   7  -3    5.48    1.04
   6   7  -3    4.96    1.12
   6   7  -3    6.56    1.43
   6   7  -3    8.77    1.26
   6   7  -3    5.71    1.46
   6   7  -2    5.79    1.28
   6   7  -2    6.80    1.29
   6   7  -2    5.39    1.22
   6   7  -2    5.82    1.48
   6   7  -2    6.14    1.18
   6   7  -2    3.29    1.44
   6   7  -1    9.61    1.62
   6   7  -1    9.81    1.35
   6   7  -1    7.98    1.23
   6   7  -1    7.03    1.45
   6   7   0    0.22    1.26
   6   7   0   -0.53    0.63
   6   7   0    0.28    0.79
  -6  -7   0    0.51    1.30
  -6  -7   0    1.04    1.09
   6   7   1   -0.22    1.26
   6   7   1    0.04    0.75
  -6  -7  -1   -1.27    1.26
  -6  -7  -1    1.09    1.26
   6   7   1    0.31    1.13
   6   7   2  156.46    8.21
   6   7   2  126.77    7.50
  -6  -7  -2  143.84    8.15
   6   7   2  141.87    7.88
   6   7   3   65.66    4.22
  -6  -7  -3   66.31    4.34
   6   7   3   60.22    3.95
  -6  -7  -4   27.44    2.03
   6   7   4   32.61    2.65
  -6  -7  -4   22.36    1.89
  -6  -7  -4   32.44    2.84
   6   7   4   26.08    2.38
   6   7   4   25.88    2.09
   6   7   5   -0.57    0.79
  -6  -7  -5    0.93    0.76
   6   7   5   -0.06    0.89
  -6  -7  -5   -0.13    1.22
   6   7   5    0.43    0.85
  -6  -7  -6   19.15    1.67
  -6  -7  -6   19.15    2.04
   6   7   6   13.77    1.63
   6   7   6   16.72    1.74
  -6  -7  -7   45.03    2.82
  -6  -7  -7   38.39    2.91
  -6  -7  -7   39.83    2.93
   6   7   7   43.79    2.91
   6   7   8   10.15    1.27
  -6  -7  -8   13.67    1.28
   6   8  -4    1.01    0.58
  -6  -8   4    0.40    0.68
   6   8  -4    0.55    0.57
   6   8  -3    0.20    0.60
   6   8  -3    0.39    0.67
   6   8  -3   -0.29    0.70
   6   8  -2   10.73    1.42
   6   8  -2   15.15    1.52
   6   8  -2   12.04    1.35
  -6  -8   2    9.24    1.61
   6   8  -2   12.60    1.38
   6   8  -1   12.43    1.60
   6   8  -1    9.87    1.27
  -6  -8   1    9.39    1.60
   6   8   0    4.71    1.35
   6   8   0    3.08    0.82
  -6  -8   0    3.11    1.26
  -6  -8   0    3.32    1.07
   6   8   0    2.93    1.14
   6   8   1   25.97    2.44
  -6  -8  -1   20.11    2.11
   6   8   1   17.10    1.70
  -6  -8  -1   23.54    2.19
   6   8   1   21.99    2.16
   6   8   2   75.15    4.55
  -6  -8  -2   55.06    3.87
   6   8   2   58.93    3.84
  -6  -8  -2   70.04    4.34
   6   8   2   64.07    4.16
   6   8   3   50.17    3.48
  -6  -8  -3   45.18    3.42
   6   8   3   42.84    3.11
   6   8   4   24.35    2.32
  -6  -8  -4   16.49    1.64
   6   8   4   22.53    2.07
  -6  -8  -4   24.01    2.42
   6   8   4   21.74    2.07
   6   8   4   21.64    1.77
   6   8   5    4.03    0.90
   6   8   5    4.93    1.11
  -6  -8  -5    4.04    1.17
   6   8   5    5.11    1.05
  -6  -8  -6   10.64    1.10
  -6  -8  -6   11.94    1.48
  -6  -8  -6   10.97    1.54
   6   8   6   11.92    1.26
   6   8   6    8.22    1.10
  -6  -8  -7    7.94    0.92
   6   8   7    7.16    1.01
  -6  -8  -7    7.26    1.11
  -6  -8  -8   10.43    0.93
   6   8   8    9.86    1.00
   6   9  -2    0.96    0.58
   6   9  -1    1.20    0.82
   6   9   0   19.81    1.89
  -6  -9   0   15.83    1.65
   6   9   0   15.67    1.66
  -6  -9  -1   41.12    2.79
   6   9   1   34.62    2.46
  -6  -9  -1   45.84    2.81
   6   9   1   42.80    2.91
   6   9   2   24.23    1.96
  -6  -9  -2   28.35    2.29
   6   9   2   27.07    2.25
   6   9   3   17.35    1.88
  -6  -9  -3   13.29    1.42
   6   9   3   15.08    1.51
  -6  -9  -3   15.75    1.75
   6   9   3   13.55    1.53
   6   9   4    7.25    1.28
   6   9   4    3.89    0.97
  -6  -9  -4    3.85    1.01
  -6  -9  -4    3.11    0.73
  -6  -9  -4    5.28    1.30
   6   9   4    3.34    0.90
   6   9   5    4.43    0.92
  -6  -9  -5    2.61    0.86
   6   9   5    2.09    0.69
   6   9   6    0.35    0.44
   6   9   6    0.62    0.66
  -6  -9  -6   -0.44    0.67
  -6  -9  -6    0.12    0.75
   6   9   7    0.03    0.53
  -6  -9  -7    0.81    0.50
  -6  -9  -7   -0.03    0.51
   6  10   0   18.83    1.44
   6  10   0   11.80    1.20
  -6 -10  -1   70.38    3.66
   6  10   1   59.77    3.62
   6  10   2    0.18    0.56
   6  10   2    0.46    0.77
  -6 -10  -2   -0.15    0.46
  -6 -10  -2    0.43    0.54
  -6 -10  -2    0.37    0.52
   6  10   3    6.23    0.93
   6  10   3   14.57    1.36
  -6 -10  -3    8.74    0.89
   6  10   3    8.72    0.93
  -6 -10  -3    8.08    0.95
  -6 -10  -3   12.13    1.17
   6  10   4    0.67    0.63
   6  10   4    0.38    0.49
  -6 -10  -4    0.17    0.47
  -6 -10  -4    0.88    0.66
   6  10   5    2.95    0.64
  -6 -10  -5    3.34    0.61
   7  -7  -3    4.06    0.70
   7  -7  -3    3.23    0.71
   7  -7  -2   33.70    2.18
   7  -7  -2   35.51    2.29
   7  -7  -2   30.74    2.11
   7  -7  -1   40.81    2.83
   7  -7  -1   51.97    2.96
   7  -7   0    2.87    0.71
   7  -7   0    2.94    0.62
   7  -7   0    1.94    0.58
   7  -7   1    4.53    0.72
   7  -7   1    2.81    0.63
  -7   6   5    3.20    0.74
   7  -6  -5    2.37    0.80
  -7   6   4   54.84    3.41
   7  -6  -4   55.52    3.35
   7  -6  -4   63.81    3.56
   7  -6  -4   60.17    3.61
  -7   6   3   78.53    4.32
   7  -6  -3   91.12    4.57
   7  -6  -3   88.04    4.54
   7  -6  -3   86.73    4.63
   7  -6  -2   74.16    4.15
   7  -6  -2   58.92    3.79
   7  -6  -2   70.31    4.02
   7  -6  -2   70.70    4.10
   7  -6  -1   44.01    2.97
   7  -6  -1   49.27    3.02
   7  -6  -1   49.18    3.06
   7  -6   0    0.46    0.78
   7  -6   0    0.77    0.73
   7  -6   0    0.24    0.65
   7  -6   1    3.05    0.89
   7  -6   1    3.30    0.85
   7  -6   1    2.98    0.70
   7  -6   2   60.60    3.47
   7  -6   2   56.39    3.42
   7  -6   3   17.26    1.47
  -7   5   6    7.20    1.16
  -7   5   6    5.16    0.84
  -7   5   6    7.26    0.95
   7  -5  -6    8.13    1.05
   7  -5  -6    6.79    1.02
  -7   5   5    0.46    0.99
  -7   5   5    0.24    0.63
  -7   5   5    0.04    0.68
  -7   5   4  291.30   14.89
  -7   5   4  353.67   15.44
   7  -5  -4  316.70   15.01
  -7   5   4  324.18   15.15
   7  -5  -4  354.25   15.23
   7  -5  -4  365.41   15.44
  -7   5   3   20.54    1.80
  -7   5   3   22.64    2.12
   7  -5  -3   25.85    2.08
   7  -5  -3   22.14    1.87
   7  -5  -3   27.81    2.16
   7  -5  -3   23.31    2.20
  -7   5   2   13.18    1.59
   7  -5  -2   14.26    1.64
   7  -5  -2   14.77    1.49
  -7   5   2    9.90    1.18
   7  -5  -2   13.88    1.56
   7  -5  -2   13.49    1.64
  -7   5   1    0.09    0.77
   7  -5  -1    0.42    0.85
   7  -5  -1    0.52    0.84
   7  -5  -1    0.78    0.88
   7  -5   0   68.01    3.99
   7  -5   0   58.88    3.73
   7  -5   0   54.14    3.52
   7  -5   0   56.34    3.66
   7  -5   1    2.17    1.02
   7  -5   1    3.02    0.79
   7  -5   2   25.84    2.03
   7  -5   2   27.16    2.04
  -7   5  -3   54.80    3.24
   7  -5   3   58.46    3.42
   7  -5   3   54.53    3.44
  -7   5  -4    3.39    0.71
   7  -5   4    3.17    0.79
   7  -5   5    0.34    0.42
  -7   5  -5    0.65    0.50
  -7   4   7    0.42    0.82
  -7   4   7    0.18    0.71
  -7   4   7    0.97    0.46
   7  -4  -7    1.51    0.65
   7  -4  -7    0.68    0.50
  -7   4   6   78.90    4.59
  -7   4   6   67.12    4.02
   7  -4  -6   74.07    4.27
  -7   4   6   70.42    4.32
  -7   4   5  415.68   22.14
   7  -4  -5  491.69   22.37
   7  -4  -5  516.41   22.55
  -7   4   5  426.21   22.36
  -7   4   4  176.37   10.13
   7  -4  -4  189.23    9.72
   7  -4  -4  170.78    9.56
  -7   4   4  193.24    9.79
   7  -4  -4  216.77    9.97
   7  -4  -4  204.77   10.10
  -7   4   4  174.96    9.86
  -7   4   3   40.60    3.09
  -7   4   3   41.35    3.37
   7  -4  -3   47.93    3.13
   7  -4  -3   40.02    2.96
  -7   4   3   42.32    3.04
   7  -4  -3   44.82    3.16
   7  -4  -3   46.07    3.31
  -7   4   2   35.87    2.66
  -7   4   2   33.73    2.89
   7  -4  -2   33.91    2.69
   7  -4  -2   32.65    2.60
   7  -4  -2   36.79    2.64
   7  -4  -2   34.66    2.79
  -7   4   1   10.27    1.56
   7  -4  -1    9.28    1.43
  -7   4   1    9.05    1.31
   7  -4  -1    9.22    1.31
   7  -4  -1   10.78    1.50
  -7   4   0    3.74    1.06
   7  -4   0    4.39    1.29
  -7   4   0    2.97    0.91
   7  -4   0    3.24    0.98
   7  -4   0    3.40    1.09
  -7   4  -1   52.00    3.47
  -7   4  -1   47.18    3.33
   7  -4   1   70.10    4.01
   7  -4   1   70.57    3.92
   7  -4   1   54.42    3.42
   7  -4   1   61.35    3.69
   7  -4   2   30.77    2.40
   7  -4   2   29.04    2.32
   7  -4   2   23.27    1.86
  -7   4  -3   73.39    4.24
   7  -4   3   74.57    4.45
   7  -4   3   76.20    4.44
  -7   4  -4   -0.18    0.64
   7  -4   4   -0.47    0.72
  -7   4  -4    0.31    0.65
  -7   4  -5    5.46    0.89
   7  -4   5    4.59    0.80
  -7   4  -5    5.22    0.91
  -7   4  -6    0.15    0.52
  -7   4  -6    1.42    0.56
   7  -4   6    0.90    0.58
   7  -3  -7   23.81    1.74
   7  -3  -7   23.06    1.85
   7  -3  -7   24.28    1.72
   7  -3  -6   30.94    2.24
  -7   3   6   31.10    2.25
   7  -3  -6   37.10    2.56
   7  -3  -5   70.47    4.41
  -7   3   5   96.17    5.40
   7  -3  -5   67.37    4.31
  -7   3   5   78.77    4.55
   7  -3  -5   90.00    4.88
   7  -3  -5   93.20    4.97
   7  -3  -4   53.23    3.41
   7  -3  -4   49.83    3.42
  -7   3   4   52.44    3.41
   7  -3  -4   60.93    3.69
  -7   3   4   45.95    3.79
   7  -3  -3   27.31    2.29
  -7   3   3   26.72    2.24
   7  -3  -3   32.81    2.66
  -7   3   3   23.48    2.52
  -7   3   2  155.78    8.46
  -7   3   2  155.73    8.69
   7  -3  -2  155.49    8.31
   7  -3  -2  144.53    8.20
  -7   3   2  149.65    8.20
   7  -3  -2  158.81    8.18
   7  -3  -2  153.41    8.46
  -7   3   1  116.56    6.66
  -7   3   1  119.12    6.86
   7  -3  -1  112.62    6.53
   7  -3  -1  113.73    6.37
   7  -3  -1  127.02    6.77
  -7   3   0   53.09    3.52
  -7   3   0   55.06    3.70
   7  -3   0   52.70    3.62
   7  -3   0   49.08    3.23
   7  -3   0   50.34    3.54
  -7   3  -1   36.48    2.67
  -7   3  -1   36.24    2.75
   7  -3   1   38.81    2.88
   7  -3   1   40.05    2.81
   7  -3   1   33.11    2.38
   7  -3   1   34.49    2.68
   7  -3   1   32.37    2.46
  -7   3  -2  909.84   44.65
  -7   3  -2  926.55   44.67
   7  -3   2 1066.86   45.04
   7  -3   2 1077.25   44.91
   7  -3   2  830.43   44.30
   7  -3   2  953.32   44.69
  -7   3  -3   -0.11    0.67
  -7   3  -3    0.68    0.73
   7  -3   3    1.52    0.94
   7  -3   3   -0.43    0.95
  -7   3  -3    0.29    0.72
  -7   3  -4    0.52    0.74
   7  -3   4    0.30    0.69
   7  -3   4    0.04    0.74
  -7   3  -4   -0.04    0.79
  -7   3  -4    0.17    0.58
  -7   3  -5   -0.75    0.79
   7  -3   5   -0.14    0.60
  -7   3  -5    0.17    0.80
  -7   3  -6    0.75    0.68
  -7   3  -6   -0.04    0.76
  -7   3  -6    0.81    0.70
  -7   3  -7    0.21    0.55
   7  -2  -8    7.57    0.90
   7  -2  -8    5.48    0.86
   7  -2  -8    6.50    0.87
  -7   2   7   82.63    4.85
   7  -2  -7   81.90    4.50
   7  -2  -7   82.49    4.43
   7  -2  -7   75.43    4.59
  -7   2   7   76.40    4.87
  -7   2   6  125.19    6.77
   7  -2  -6  112.57    6.10
   7  -2  -6  103.23    6.00
   7  -2  -6  119.83    6.27
  -7   2   5   76.43    4.80
   7  -2  -5   62.47    4.03
   7  -2  -5   59.08    3.87
  -7   2   5   62.51    3.91
   7  -2  -5   79.44    4.41
   7  -2  -5   81.00    4.44
  -7   2   4   59.37    4.13
   7  -2  -4   54.24    3.43
   7  -2  -4   51.72    3.50
   7  -2  -4   44.19    3.10
  -7   2   4   47.56    3.27
   7  -2  -4   61.30    3.70
   7  -2  -4   62.19    3.83
  -7   2   3  111.65    6.57
   7  -2  -3  105.88    6.03
   7  -2  -3  104.07    6.05
  -7   2   3   93.31    5.77
   7  -2  -3  121.22    6.13
  -7   2   3  105.33    6.52
   7  -2  -2    0.22    0.86
   7  -2  -2    0.32    0.92
  -7   2   2    0.20    1.24
  -7   2   2    0.09    0.74
   7  -2  -2   -0.24    0.87
   7  -2  -2   -0.48    1.02
  -7   2   1    2.23    1.33
  -7   2   1    1.57    1.25
   7  -2  -1    2.47    0.90
   7  -2  -1    2.23    1.13
  -7   2   0  119.00    6.66
  -7   2   0  120.86    6.76
   7  -2   0  122.95    6.59
   7  -2   0  121.95    6.49
   7  -2   0  101.14    6.11
   7  -2   0  119.56    6.62
  -7   2  -1  213.57   10.89
  -7   2  -1  204.98   10.90
   7  -2   1  230.53   10.94
   7  -2   1  221.69   10.79
   7  -2   1  182.60   10.30
   7  -2   1  216.46   10.87
  -7   2  -2   31.67    2.75
   7  -2   2   40.15    3.05
   7  -2   2   38.49    2.82
   7  -2   2   31.59    2.65
  -7   2  -3   31.41    2.29
  -7   2  -3   29.58    2.47
  -7   2  -3   27.77    2.55
   7  -2   3   32.37    2.62
   7  -2   3   32.42    2.56
  -7   2  -4    1.57    0.76
  -7   2  -4    2.01    0.86
   7  -2   4    2.54    0.87
   7  -2   4    2.23    0.88
  -7   2  -4    2.08    0.96
  -7   2  -4    2.32    0.94
  -7   2  -5    7.67    1.20
   7  -2   5    6.56    1.04
  -7   2  -5    7.54    1.30
  -7   2  -5    7.57    1.12
  -7   2  -6   -0.09    0.83
  -7   2  -6    0.24    0.88
  -7   2  -6   -0.05    0.85
  -7   2  -6    0.35    0.58
  -7   2  -7    0.22    0.72
  -7   2  -7    0.37    0.89
  -7   2  -7    0.90    0.69
   7  -1  -8   17.04    1.38
   7  -1  -8   15.02    1.27
   7  -1  -8   16.91    1.40
   7  -1  -8   13.09    1.27
  -7   1   7   60.24    3.95
   7  -1  -7   69.22    3.90
   7  -1  -7   65.77    3.88
  -7   1   6    1.30    1.20
  -7   1   6    1.25    1.39
   7  -1  -6    2.11    0.86
   7  -1  -6    2.39    1.12
   7  -1  -6    1.49    0.76
   7  -1  -6    1.04    0.87
  -7   1   5   20.05    2.29
   7  -1  -5   17.10    1.78
  -7   1   5   12.89    2.24
   7  -1  -5   17.44    1.67
   7  -1  -5   17.41    1.71
   7  -1  -5   20.86    2.02
   7  -1  -5   20.21    1.91
  -7   1   4    0.52    1.33
   7  -1  -4    0.14    0.69
  -7   1   4   -1.13    1.52
   7  -1  -4    0.33    0.95
  -7   1   4   -0.23    0.63
   7  -1  -4    0.13    0.72
   7  -1  -4   -0.05    1.07
   7  -1  -4    0.84    1.04
   7  -1  -4    0.96    0.74
  -7   1   3  130.29    7.06
   7  -1  -3  123.35    6.55
   7  -1  -3  120.04    6.60
  -7   1   3   98.06    6.11
   7  -1  -3  121.44    6.50
   7  -1  -3  122.23    6.71
  -7   1   2    4.54    1.58
   7  -1  -2    6.90    1.26
  -7   1   2    5.29    0.94
   7  -1  -2    4.97    1.15
   7  -1  -2    5.75    1.34
  -7   1   1   14.23    2.06
   7  -1  -1   16.85    1.75
   7  -1  -1   16.15    1.84
   7  -1   0  189.51    9.23
   7  -1   0  189.23    9.10
   7  -1   0  156.36    8.72
   7  -1   0  179.12    9.24
   7  -1   0  163.36    8.82
  -7   1  -1   46.42    3.45
  -7   1  -1   47.38    3.51
   7  -1   1   55.69    3.47
   7  -1   1   57.18    3.36
   7  -1   1   42.53    2.88
   7  -1   1   54.94    3.48
   7  -1   1   49.64    3.25
  -7   1  -2    4.05    1.23
   7  -1   2    4.06    1.14
   7  -1   2    2.66    1.00
  -7   1  -2    3.21    1.23
   7  -1   2    4.66    1.11
   7  -1   2    4.87    1.10
  -7   1  -3    9.47    1.17
  -7   1  -3   13.34    1.62
   7  -1   3   11.21    1.49
   7  -1   3   10.97    1.36
  -7   1  -3    9.86    1.55
   7  -1   3   11.56    1.40
  -7   1  -4    4.13    1.24
  -7   1  -4    3.59    1.07
   7  -1   4    4.14    1.19
   7  -1   4    4.07    1.10
  -7   1  -4    6.30    1.34
  -7   1  -4    4.49    1.43
  -7   1  -5  101.84    5.54
  -7   1  -5   94.24    5.39
  -7   1  -5  106.63    5.63
   7  -1   5   87.52    5.21
  -7   1  -5   97.75    5.65
  -7   1  -6   19.75    1.86
  -7   1  -6   14.88    1.43
  -7   1  -6   17.62    1.95
  -7   1  -6   22.16    2.01
  -7   1  -7    1.27    0.88
  -7   1  -7    0.55    1.02
  -7   1  -7    1.49    0.84
  -7   1  -7   -0.03    0.62
  -7   1  -8    4.19    0.91
  -7   1  -8    3.92    1.05
  -7   1  -8    4.88    0.84
   7  -1   8    3.95    0.85
   7   0  -8   43.74    2.55
   7   0  -8   45.46    2.52
   7   0  -8   48.03    2.62
   7   0  -8   32.76    2.38
  -7   0   8   26.04    2.39
  -7   0   7   18.88    1.70
   7   0  -7   22.48    1.89
   7   0  -7   25.21    1.94
   7   0  -7   23.87    1.94
  -7   0   7   15.71    1.96
  -7   0   6    0.70    1.04
  -7   0   6    1.35    1.25
   7   0  -6    0.49    0.78
   7   0  -6    0.56    0.87
   7   0  -6   -0.54    1.06
   7   0  -6    0.82    0.64
   7   0  -6    0.70    0.89
  -7   0   5    9.32    1.65
  -7   0   5    6.88    1.87
   7   0  -5    8.26    1.40
   7   0  -5    7.60    1.34
   7   0  -5    8.92    1.54
   7   0  -5    7.88    1.26
   7   0  -5    8.28    1.31
   7   0  -4  227.60   11.60
  -7   0   4  217.18   11.79
   7   0  -4  216.17   11.35
   7   0  -4  210.53   11.26
   7   0  -4  226.38   11.46
   7   0  -4  238.01   11.60
   7   0  -4  231.15   11.63
  -7   0   3   96.28    5.71
   7   0  -3   87.63    5.27
   7   0  -3   92.69    5.44
   7   0  -3   86.04    4.98
   7   0  -3   89.55    5.18
   7   0  -3   92.82    5.29
   7   0  -3   94.35    5.49
  -7   0   2   83.25    4.99
   7   0  -2   75.75    4.59
   7   0  -2   72.38    4.35
   7   0  -2   70.75    4.43
  -7   0   2   80.68    5.05
  -7   0   1  101.22    6.19
  -7   0   1  100.03    6.06
   7   0  -1  106.76    5.85
   7   0  -1  108.73    5.82
   7   0  -1   95.47    5.50
   7   0  -1   95.68    5.85
  -7   0   0   48.39    3.49
   7   0   0   48.86    3.24
   7   0   0   45.23    3.07
   7   0   0   41.74    2.76
   7   0   0   47.46    3.29
   7   0   0   45.15    2.96
  -7   0  -1   46.96    3.36
   7   0   1   41.75    3.06
   7   0   1   43.31    2.95
   7   0   1   42.28    3.10
   7   0   1   42.61    2.96
  -7   0  -2    3.69    1.27
   7   0   2    5.32    1.13
   7   0   2    4.42    0.98
   7   0   2    4.92    1.15
   7   0   2    4.90    1.12
  -7   0  -3    0.06    1.02
   7   0   3    0.47    0.80
   7   0   3    0.04    0.68
   7   0   3    0.40    0.82
  -7   0  -4   50.67    3.42
  -7   0  -4   58.75    3.78
   7   0   4   60.49    3.68
   7   0   4   54.06    3.40
  -7   0  -4   55.58    3.66
   7   0   4   61.35    3.96
  -7   0  -5  234.40   12.19
  -7   0  -5  240.17   12.26
  -7   0  -5  251.36   12.41
  -7   0  -5  234.59   12.39
  -7   0  -6   36.71    2.77
  -7   0  -6   35.07    2.58
  -7   0  -6   39.47    2.84
  -7   0  -6   35.08    2.94
  -7   0  -6   38.76    2.86
  -7   0  -7   -0.03    0.56
  -7   0  -7    0.73    0.98
  -7   0  -7    0.17    1.21
  -7   0  -7    0.52    0.85
  -7   0  -7    1.27    0.84
   7   0   7    0.05    0.93
  -7   0  -8    1.69    0.92
  -7   0  -8    1.44    0.77
  -7   0  -8    1.77    0.68
   7   0   8    1.47    0.82
   7   1  -8   22.89    1.70
   7   1  -8   25.93    1.74
   7   1  -8   27.53    1.77
   7   1  -7   19.30    1.73
   7   1  -7   29.50    2.16
   7   1  -7   33.17    2.25
   7   1  -7   34.25    2.27
  -7  -1   7   20.15    2.05
  -7  -1   6   16.86    1.73
   7   1  -6   20.16    1.86
   7   1  -6   18.79    1.92
   7   1  -6   25.53    2.10
   7   1  -6   20.12    1.98
   7   1  -6   22.95    2.11
  -7  -1   6   18.28    2.11
  -7  -1   5   32.06    2.61
   7   1  -5   32.07    2.64
   7   1  -5   31.82    2.54
   7   1  -5   39.05    2.80
   7   1  -5   32.98    2.62
   7   1  -5   41.53    2.88
   7   1  -5   29.05    2.37
  -7  -1   5   28.42    2.86
  -7  -1   4  569.17   27.18
   7   1  -4  517.83   26.82
   7   1  -4  578.92   27.18
   7   1  -4  530.65   26.86
   7   1  -4  605.65   27.20
   7   1  -4  564.10   27.02
   7   1  -4  579.80   27.10
   7   1  -4  551.97   27.04
  -7  -1   4  522.63   27.35
  -7  -1   3   50.85    3.57
   7   1  -3   51.45    3.33
   7   1  -3   45.00    3.05
   7   1  -3   49.39    3.37
   7   1  -3   42.56    3.08
   7   1  -3   51.24    3.32
   7   1  -3   51.08    3.44
  -7  -1   2  642.68   32.02
   7   1  -2  662.90   31.90
   7   1  -2  717.71   32.02
   7   1  -2  675.66   31.80
   7   1  -2  595.93   31.61
   7   1  -2  676.51   32.00
  -7  -1   2  677.75   32.17
  -7  -1   1  113.31    6.47
  -7  -1   1  120.41    6.46
   7   1  -1  114.03    6.26
   7   1  -1  111.69    6.22
   7   1  -1   99.24    5.85
   7   1  -1  110.53    5.94
  -7  -1   0    9.45    1.57
   7   1   0    6.82    1.29
  -7  -1   0    8.39    1.55
   7   1   0    7.17    0.98
   7   1   0    6.43    1.35
   7   1   0    9.26    1.23
  -7  -1  -1   -0.50    1.01
   7   1   1   -0.37    0.87
   7   1   1    0.57    0.82
  -7  -1  -1    1.02    1.06
   7   1   1    0.50    0.93
   7   1   1   -0.05    0.78
  -7  -1  -2    1.11    1.12
   7   1   2    1.97    0.95
   7   1   2    2.08    0.80
  -7  -1  -2    0.39    1.03
   7   1   2    1.97    1.00
   7   1   2    1.80    0.94
   7   1   3   -0.16    0.86
   7   1   3    0.16    0.66
  -7  -1  -3    0.96    1.07
   7   1   3   -0.21    0.86
   7   1   3    0.11    0.92
  -7  -1  -4   13.98    1.56
  -7  -1  -4   18.77    1.97
   7   1   4   18.03    1.74
   7   1   4   15.83    1.44
  -7  -1  -4   16.11    1.84
  -7  -1  -5   39.83    3.18
  -7  -1  -5   56.40    3.54
   7   1   5   50.08    3.22
  -7  -1  -5   44.75    3.48
   7   1   5   57.62    3.78
  -7  -1  -6    4.45    1.17
  -7  -1  -6    5.46    1.28
  -7  -1  -6    4.57    1.55
  -7  -1  -6    5.97    1.21
   7   1   6    6.68    1.42
  -7  -1  -7   16.18    1.95
  -7  -1  -7   17.87    1.70
  -7  -1  -7   14.33    2.16
  -7  -1  -7   22.77    1.92
   7   1   7   21.32    2.08
  -7  -1  -8    9.95    1.04
  -7  -1  -8   11.21    1.31
  -7  -1  -8    8.27    1.43
  -7  -1  -8    7.35    1.58
  -7  -1  -8   15.19    1.39
   7   1   8   12.12    1.39
  -7  -1  -9    5.82    0.81
  -7  -1  -9    5.94    0.78
   7   2  -7   24.69    1.91
   7   2  -7   23.44    1.89
   7   2  -7   22.92    1.90
   7   2  -6   25.35    2.19
   7   2  -6   32.96    2.39
   7   2  -6   28.71    2.38
   7   2  -6   30.28    2.39
   7   2  -6   28.96    2.43
   7   2  -5   15.44    1.85
   7   2  -5   17.68    1.86
   7   2  -5   18.88    1.98
   7   2  -5   16.64    1.84
   7   2  -5   16.29    1.92
  -7  -2   4    9.59    1.41
   7   2  -4   10.74    1.31
  -7  -2   4   10.84    1.70
   7   2  -4   12.53    1.75
   7   2  -4   12.91    1.57
   7   2  -4   11.42    1.62
   7   2  -4   10.88    1.40
   7   2  -4   10.69    1.50
  -7  -2   3 1597.22   77.06
   7   2  -3 1665.34   77.12
   7   2  -3 1595.09   76.92
   7   2  -3 1648.25   77.18
   7   2  -3 1623.28   76.99
   7   2  -3 1646.02   77.05
   7   2  -3 1693.47   77.17
  -7  -2   3 1569.86   77.27
  -7  -2   2   82.53    4.86
   7   2  -2   83.46    4.85
   7   2  -2   80.07    4.81
   7   2  -2   78.18    4.50
   7   2  -2   79.86    4.80
   7   2  -2   76.54    4.51
   7   2  -2   84.55    4.88
   7   2  -2   70.17    4.37
  -7  -2   2   74.51    4.87
  -7  -2   1   94.51    5.37
  -7  -2   1   90.25    5.19
   7   2  -1   89.72    5.21
   7   2  -1   93.40    5.19
   7   2  -1   76.75    4.76
   7   2  -1   84.63    4.94
  -7  -2   0    7.22    1.33
   7   2   0    4.90    1.15
  -7  -2   0    6.54    1.32
   7   2   0    5.04    0.85
   7   2   0    5.71    1.32
   7   2   0    6.60    1.12
  -7  -2  -1    0.96    0.97
   7   2   1    0.66    0.91
   7   2   1    0.35    0.81
  -7  -2  -1    0.81    1.00
   7   2   1    1.31    1.02
   7   2   1    1.01    0.86
  -7  -2  -2   88.16    5.10
  -7  -2  -2   83.62    5.07
   7   2   2   87.75    5.12
   7   2   2   75.15    4.72
   7   2   2   87.42    5.14
   7   2   2   92.33    5.16
  -7  -2  -3   13.19    1.70
   7   2   3    9.68    1.19
   7   2   3   10.81    1.52
  -7  -2  -3   12.28    1.65
   7   2   4    0.54    0.81
  -7  -2  -4   -0.12    1.12
  -7  -2  -4    0.12    0.64
   7   2   4    1.28    1.10
  -7  -2  -5    7.27    1.30
   7   2   5   10.81    1.35
  -7  -2  -5    9.30    1.23
  -7  -2  -5    8.31    1.58
  -7  -2  -5    7.88    1.43
   7   2   5   10.49    1.70
  -7  -2  -6   11.91    1.60
  -7  -2  -6    8.02    1.50
  -7  -2  -6   11.17    1.39
  -7  -2  -6    9.66    1.60
   7   2   6   10.98    1.69
  -7  -2  -7   10.87    1.43
  -7  -2  -7    7.94    1.47
  -7  -2  -7    9.08    1.27
  -7  -2  -7    8.23    1.42
   7   2   7   10.12    1.53
  -7  -2  -8    2.14    0.76
  -7  -2  -8    2.68    0.81
   7   2   8    3.11    0.90
  -7  -2  -9    3.41    0.65
   7   2   9    2.29    0.63
   7   3  -7   -0.03    0.53
   7   3  -7    1.14    0.73
   7   3  -7    0.93    0.68
   7   3  -7    0.97    0.73
   7   3  -6   12.45    1.49
   7   3  -6   14.37    1.64
   7   3  -6   14.62    1.65
   7   3  -6   16.45    1.69
   7   3  -6   15.34    1.69
   7   3  -5   23.03    2.23
   7   3  -5   25.82    2.24
   7   3  -5   27.86    2.37
   7   3  -5   26.03    2.26
   7   3  -5   28.00    2.34
   7   3  -4   57.41    3.69
   7   3  -4   60.70    3.84
   7   3  -4   59.58    3.76
   7   3  -4   56.19    3.63
  -7  -3   3   11.23    1.37
   7   3  -3   12.00    1.55
  -7  -3   3   12.14    1.62
   7   3  -3   12.61    1.84
   7   3  -3   13.93    1.70
   7   3  -3   13.02    1.86
   7   3  -3   12.00    1.56
   7   3  -3   10.70    1.56
   7   3  -3   11.96    1.52
  -7  -3   2   16.12    1.74
   7   3  -2   21.45    2.10
   7   3  -2   18.97    2.10
  -7  -3   2   11.57    1.76
   7   3  -2   15.83    1.78
   7   3  -2   18.41    1.82
   7   3  -2   17.63    1.82
   7   3  -2   17.41    1.95
   7   3  -2   15.48    1.69
  -7  -3   1   74.87    4.56
  -7  -3   1   75.61    4.50
   7   3  -1   87.39    4.85
   7   3  -1   78.81    4.65
   7   3  -1   71.93    4.33
   7   3  -1   71.29    4.32
   7   3  -1   65.66    4.23
   7   3  -1   75.89    4.68
   7   3  -1   78.72    4.53
  -7  -3   0    1.74    0.98
   7   3   0    1.88    0.95
  -7  -3   0    1.30    0.99
   7   3   0    1.90    0.96
  -7  -3  -1    2.43    1.10
   7   3   1    3.20    1.15
   7   3   1    4.77    1.05
  -7  -3  -1    4.11    1.11
   7   3   1    4.55    1.23
   7   3   1    3.83    1.15
  -7  -3  -2    1.04    1.00
   7   3   2    2.53    1.13
   7   3   2    1.33    0.76
  -7  -3  -2    2.25    1.04
   7   3   2    2.25    1.06
  -7  -3  -3    9.74    1.49
   7   3   3   11.14    1.57
  -7  -3  -3   10.82    1.48
  -7  -3  -4    8.79    1.54
   7   3   4    9.56    1.44
  -7  -3  -4    7.59    1.42
   7   3   4    9.40    1.59
  -7  -3  -5    0.97    1.14
   7   3   5   -0.31    0.79
  -7  -3  -5    0.30    0.64
  -7  -3  -5    0.50    0.64
  -7  -3  -5    0.38    1.01
  -7  -3  -5    1.24    1.10
   7   3   5    1.07    1.17
  -7  -3  -6    2.79    0.83
  -7  -3  -6    2.26    0.70
  -7  -3  -6    1.19    1.05
  -7  -3  -6    1.47    0.87
   7   3   6    3.06    1.16
  -7  -3  -7    0.86    0.98
  -7  -3  -7    0.48    0.72
  -7  -3  -7    0.56    0.93
   7   3   7    0.94    0.96
  -7  -3  -8   -0.32    0.88
  -7  -3  -8    0.15    1.13
  -7  -3  -8    0.10    0.80
  -7  -3  -8   -0.38    0.98
   7   3   8   -0.35    0.92
   7   3   9    1.17    0.66
  -7  -3  -9    2.36    0.58
  -7  -3  -9    1.77    0.55
  -7  -3  -9    1.31    0.65
   7   4  -6    2.98    0.89
   7   4  -6    2.60    0.97
   7   4  -6    2.99    0.97
   7   4  -6    3.47    1.04
   7   4  -5   11.15    1.57
   7   4  -5   10.40    1.53
   7   4  -5   11.61    1.58
   7   4  -4   37.84    2.96
   7   4  -4   37.95    2.89
   7   4  -4   37.53    2.90
   7   4  -4   32.40    2.72
   7   4  -3    1.03    1.14
   7   4  -3    0.60    0.97
   7   4  -3    1.00    1.03
   7   4  -3    1.66    1.08
   7   4  -3    0.50    0.74
   7   4  -2   12.36    1.61
   7   4  -2   10.25    1.55
  -7  -4   2    6.91    1.19
   7   4  -2    8.73    1.41
   7   4  -2    9.23    1.34
   7   4  -2   10.10    1.45
   7   4  -2   10.59    1.39
  -7  -4   1    4.16    0.99
   7   4  -1    6.00    1.54
   7   4  -1    5.48    1.40
  -7  -4   1    3.80    1.10
   7   4  -1    3.78    1.19
   7   4  -1    4.57    1.12
   7   4  -1    5.17    1.30
   7   4  -1    5.09    1.28
  -7  -4   0   18.22    1.68
  -7  -4   0   18.79    1.72
   7   4   0   14.43    1.77
   7   4   0   21.27    2.01
  -7  -4  -1   36.19    2.55
  -7  -4  -1   33.62    2.54
   7   4   1   36.88    2.91
   7   4   1   30.98    2.45
   7   4   1   36.65    2.82
  -7  -4  -2   18.69    1.71
  -7  -4  -2   17.61    1.75
   7   4   2   20.18    2.08
   7   4   2   12.87    1.44
  -7  -4  -3    5.87    1.30
   7   4   3    6.63    1.42
  -7  -4  -3    6.31    1.17
   7   4   3    8.82    1.53
   7   4   4    0.24    0.65
  -7  -4  -4    0.77    1.04
   7   4   4    0.12    0.91
  -7  -4  -4   -0.05    0.84
  -7  -4  -4   -0.44    1.28
   7   4   4   -0.56    1.09
   7   4   5    0.09    0.71
  -7  -4  -5    0.17    1.06
   7   4   5    0.87    0.86
  -7  -4  -5    0.51    0.88
  -7  -4  -5    0.72    1.19
   7   4   5    0.31    1.10
  -7  -4  -6    4.81    1.27
  -7  -4  -6    4.06    0.91
  -7  -4  -6    3.64    1.10
   7   4   6    4.29    1.21
  -7  -4  -7   15.42    1.68
  -7  -4  -7   14.80    1.61
  -7  -4  -7   11.42    1.26
   7   4   7   15.94    1.68
   7   4   8    5.61    1.16
  -7  -4  -8    8.35    1.16
   7   4   8    8.94    1.19
  -7  -4  -9   21.12    1.53
  -7  -4  -9   22.82    1.57
   7   5  -6    1.12    0.61
   7   5  -6    2.01    0.81
   7   5  -6    1.60    0.72
   7   5  -6    2.24    0.81
   7   5  -5    3.70    1.11
   7   5  -5    4.00    1.04
   7   5  -5    4.77    1.19
   7   5  -4   21.58    2.10
   7   5  -4   22.65    2.18
   7   5  -4   24.52    2.23
   7   5  -4   19.21    1.98
   7   5  -3    9.14    1.24
   7   5  -3    9.50    1.38
   7   5  -3   11.03    1.61
   7   5  -3   10.36    1.60
   7   5  -3    8.91    1.40
   7   5  -3   10.40    1.64
   7   5  -2    4.16    1.14
   7   5  -2    4.26    1.24
   7   5  -2    2.25    1.13
  -7  -5   2    2.28    1.16
   7   5  -2    2.76    0.94
   7   5  -2    4.05    1.29
   7   5  -2    2.51    0.97
   7   5  -1    1.40    1.21
   7   5  -1    2.81    1.11
   7   5  -1    3.21    1.12
   7   5  -1    2.95    0.91
   7   5  -1    1.61    1.12
   7   5  -1    3.00    1.08
   7   5   0   23.95    2.28
   7   5   0   24.46    2.25
   7   5   0   30.56    2.53
  -7  -5  -1   36.93    2.68
   7   5   1   46.40    3.37
   7   5   1   42.28    3.17
  -7  -5  -2    3.96    0.98
   7   5   2    4.06    1.37
  -7  -5  -2    3.98    1.67
  -7  -5  -3    0.88    0.92
   7   5   3    0.66    1.16
  -7  -5  -3    0.25    0.68
   7   5   3    0.56    1.13
  -7  -5  -4   -0.47    0.96
   7   5   4    0.69    1.00
  -7  -5  -4    0.52    0.77
  -7  -5  -4    0.37    1.35
   7   5   4    0.69    1.17
   7   5   5    1.24    0.78
  -7  -5  -5    0.27    0.97
   7   5   5    1.34    0.93
  -7  -5  -5    1.03    0.86
  -7  -5  -5    1.35    1.23
   7   5   5    1.89    1.14
   7   5   6    9.07    1.33
  -7  -5  -6   12.33    1.41
  -7  -5  -6   13.41    1.63
  -7  -5  -6    9.67    1.40
  -7  -5  -6    8.93    1.51
   7   5   6   13.99    1.70
   7   5   7    4.14    1.01
  -7  -5  -7    5.25    1.15
  -7  -5  -7    4.06    0.89
  -7  -5  -7    5.92    1.01
  -7  -5  -7    3.81    0.88
   7   5   7    4.57    1.07
   7   5   8    7.01    1.08
  -7  -5  -8   10.64    1.23
  -7  -5  -8   10.28    1.12
   7   5   8    7.40    1.04
  -7  -5  -9    7.31    0.80
   7   6  -5   -0.03    0.63
   7   6  -5   -0.46    0.71
   7   6  -5   -0.03    0.62
   7   6  -5    0.33    0.76
   7   6  -4    0.13    0.82
   7   6  -4    0.67    0.85
   7   6  -4    0.68    0.97
   7   6  -3    4.19    0.95
   7   6  -3    4.30    0.97
   7   6  -3    4.02    1.15
   7   6  -3    4.52    1.10
   7   6  -3    5.37    1.37
   7   6  -2    0.94    0.96
   7   6  -2   -0.65    1.02
   7   6  -2    1.40    1.04
  -7  -6   2    0.39    0.84
   7   6  -2    0.63    0.80
   7   6  -2    1.00    1.14
   7   6  -2    0.46    0.85
   7   6  -1    3.44    1.14
   7   6  -1    5.56    1.28
  -7  -6   1    4.25    1.33
   7   6  -1    4.51    1.31
   7   6  -1    4.58    1.19
   7   6   0   23.61    2.07
  -7  -6   0   23.79    2.52
   7   6   0   24.66    2.34
   7   6   1   -0.94    0.80
  -7  -6  -1   -0.65    0.95
  -7  -6  -1    1.41    1.44
  -7  -6  -2    1.72    0.83
   7   6   2    3.40    1.02
  -7  -6  -2    3.49    1.80
   7   6   2    5.13    1.66
  -7  -6  -3   -0.17    0.76
   7   6   3   -1.78    1.37
  -7  -6  -3   -1.29    1.64
   7   6   3    0.75    1.24
  -7  -6  -4   -0.42    0.84
   7   6   4    0.13    1.02
   7   6   4   -0.24    1.10
  -7  -6  -5   22.88    2.03
  -7  -6  -5   20.21    1.68
   7   6   5   24.11    2.12
   7   6   5   22.47    2.16
   7   6   5   20.70    1.78
   7   6   6    1.15    0.74
  -7  -6  -6    1.48    0.92
  -7  -6  -6    0.35    0.83
  -7  -6  -6    0.82    0.63
  -7  -6  -6   -0.77    0.99
   7   6   6    1.07    0.87
   7   6   7    5.01    0.99
  -7  -6  -7    7.68    1.11
  -7  -6  -7    5.42    1.00
  -7  -6  -7    5.37    0.99
  -7  -6  -7    5.08    0.83
   7   6   7    5.00    0.98
   7   6   8    0.09    0.57
  -7  -6  -8    0.96    0.67
  -7  -6  -8    0.51    0.46
   7   7  -4    0.59    0.63
   7   7  -4    0.03    0.59
   7   7  -3    3.49    0.79
   7   7  -3    4.18    0.98
   7   7  -3    3.91    0.89
   7   7  -2    0.04    0.79
   7   7  -2    1.05    0.85
   7   7  -2    0.36    0.77
   7   7  -2    0.52    0.70
   7   7  -1    7.40    1.40
   7   7  -1    5.32    1.07
  -7  -7   1    3.93    1.33
   7   7  -1    6.40    1.27
   7   7   0   -0.40    1.20
   7   7   0   -0.38    0.73
  -7  -7   0    1.13    1.07
  -7  -7   0    0.94    1.09
   7   7   1   -0.56    1.37
  -7  -7  -1   -0.05    0.89
  -7  -7  -1    1.58    1.29
   7   7   2    2.58    1.86
   7   7   2    2.27    0.99
  -7  -7  -2   -0.71    1.16
  -7  -7  -2    0.90    1.70
   7   7   2    4.31    1.68
   7   7   3   16.89    1.95
   7   7   3   10.93    1.37
  -7  -7  -3   14.46    2.08
   7   7   3   13.89    1.78
  -7  -7  -4   10.27    1.22
   7   7   4   13.77    1.73
   7   7   4   11.69    1.56
  -7  -7  -5    0.95    0.71
   7   7   5    0.05    0.83
  -7  -7  -5    0.12    1.07
   7   7   5    0.81    0.86
   7   7   6    1.81    0.69
  -7  -7  -6    2.41    0.76
  -7  -7  -6    1.81    0.90
  -7  -7  -6    2.13    1.10
   7   7   6    2.41    0.83
   7   7   7    0.34    0.55
  -7  -7  -7    0.48    0.63
  -7  -7  -7   -0.23    0.63
  -7  -7  -7   -0.14    0.66
   7   7   7   -0.18    0.57
  -7  -7  -8    0.30    0.48
   7   8  -3    0.23    0.52
  -7  -8   3    0.64    0.64
   7   8  -2    4.87    0.83
   7   8  -2    3.68    0.81
   7   8  -2    3.03    0.74
  -7  -8   2    4.08    0.97
   7   8  -1    0.51    0.78
   7   8  -1    0.68    0.87
   7   8  -1    0.32    0.58
  -7  -8   1    1.03    0.89
   7   8   0    4.88    1.22
  -7  -8   0    4.05    1.04
  -7  -8   0    4.18    1.01
  -7  -8  -1    0.35    0.83
  -7  -8  -1   -0.62    0.95
   7   8   1    0.62    0.99
  -7  -8  -2   10.33    1.20
   7   8   2   14.61    1.76
   7   8   2    8.37    1.06
  -7  -8  -2   14.25    1.74
   7   8   2   11.07    1.55
   7   8   3    9.57    1.54
   7   8   3    7.04    1.07
  -7  -8  -3   10.81    1.63
   7   8   3    8.44    1.38
   7   8   4    3.27    1.02
   7   8   4    2.80    0.83
  -7  -8  -4    2.44    1.19
   7   8   4    2.33    0.96
   7   8   5   25.83    2.00
   7   8   5   19.43    1.76
  -7  -8  -5   25.23    1.99
   7   8   5   19.37    1.80
  -7  -8  -6    4.50    1.00
   7   8   6    2.05    0.68
  -7  -8  -7    0.61    0.55
  -7  -8  -7    0.11    0.52
   7   9  -1    1.49    0.65
   7   9  -1    2.94    0.72
  -7  -9   1    2.98    0.70
   7   9   0    0.91    0.80
  -7  -9   0    0.97    0.66
   7   9   1    0.69    0.68
  -7  -9  -1    0.13    0.61
   7   9   2   15.04    1.58
  -7  -9  -2   11.21    1.05
  -7  -9  -2   11.71    1.35
   7   9   2   10.11    1.32
   7   9   3    1.37    0.53
  -7  -9  -3    2.74    0.94
   7   9   3    1.99    0.80
   7   9   4   26.66    2.03
   7   9   4   18.01    1.54
  -7  -9  -4   22.58    1.83
  -7  -9  -4   28.93    2.07
   7   9   4   19.10    1.73
   7   9   5    7.22    0.94
   7   9   5    7.35    0.88
  -7  -9  -5    7.46    0.98
  -7  -9  -5    9.39    1.18
  -7  -9  -6    5.29    0.78
  -7  -9  -6    5.51    0.85
   8  -6  -3    4.90    0.77
   8  -6  -3    5.20    0.78
   8  -6  -2   19.95    1.52
   8  -6  -2   16.31    1.39
   8  -6  -2   17.74    1.43
   8  -6  -1    2.83    0.65
   8  -6   0    0.16    0.55
   8  -6   0    0.13    0.48
   8  -6   1    0.27    0.50
   8  -6   1    0.30    0.46
  -8   5   5   11.07    1.11
   8  -5  -5    9.30    1.08
  -8   5   4    3.38    0.83
   8  -5  -4    3.22    0.79
   8  -5  -4    2.98    0.85
  -8   5   3    0.78    0.74
   8  -5  -3    0.32    0.59
   8  -5  -3    0.09    0.51
   8  -5  -3    0.64    0.70
   8  -5  -3    0.85    0.78
  -8   5   2    0.37    0.66
   8  -5  -2    0.17    0.71
   8  -5  -2    0.21    0.64
   8  -5  -2    0.68    0.70
   8  -5  -2    0.04    0.74
  -8   5   1    0.33    0.52
   8  -5  -1    0.38    0.67
   8  -5  -1    0.24    0.65
   8  -5  -1    0.72    0.68
   8  -5   0    5.30    1.01
   8  -5   0    3.83    0.89
   8  -5   0    2.55    0.72
   8  -5   0    3.00    0.73
   8  -5   1    8.57    1.15
   8  -5   2   84.74    4.45
   8  -5   2   74.05    4.35
   8  -5   3   43.12    2.60
   8  -4  -6   -0.03    0.47
  -8   4   5    0.24    0.63
   8  -4  -5    0.11    0.67
   8  -4  -5    0.48    0.70
  -8   4   4   82.20    4.88
  -8   4   4   93.15    5.19
   8  -4  -4   90.38    4.84
   8  -4  -4   77.50    4.71
   8  -4  -4   91.42    5.01
   8  -4  -4  103.70    5.25
  -8   4   3   34.80    2.61
  -8   4   3   39.09    2.91
   8  -4  -3   40.39    2.74
   8  -4  -3   35.97    2.61
   8  -4  -3   41.39    2.74
   8  -4  -3   41.87    2.91
  -8   4   2   24.64    2.09
  -8   4   2   27.42    2.33
   8  -4  -2   28.01    2.26
   8  -4  -2   32.63    2.32
   8  -4  -2   26.26    2.15
   8  -4  -2   31.11    2.43
  -8   4   1    0.32    0.80
   8  -4  -1   -0.14    0.84
  -8   4   1    0.46    0.68
   8  -4  -1   -0.75    0.77
   8  -4  -1    1.24    0.93
  -8   4   0   33.43    2.44
  -8   4   0   36.62    2.58
   8  -4   0   37.72    2.51
   8  -4   0   39.95    2.75
  -8   4  -1  162.31    8.86
   8  -4   1  221.08    9.51
   8  -4   1  210.81    9.35
   8  -4   1  155.95    8.81
   8  -4   2   25.33    2.06
   8  -4   2   25.12    2.03
   8  -4   3   18.74    1.55
   8  -4   3   16.55    1.54
   8  -4   3   15.36    1.36
   8  -4   4    3.80    0.75
   8  -4   4    4.61    0.72
  -8   3   6   10.77    1.32
  -8   3   6    6.25    1.11
   8  -3  -6    9.86    1.07
   8  -3  -6    7.96    1.08
  -8   3   5    1.41    0.99
   8  -3  -5    0.29    0.53
  -8   3   5    0.97    0.92
   8  -3  -5    0.62    0.85
   8  -3  -5   -0.32    0.77
  -8   3   4   63.38    3.86
   8  -3  -4   56.26    3.46
   8  -3  -4   50.51    3.45
   8  -3  -4   60.91    3.70
   8  -3  -3    5.17    1.10
   8  -3  -3    5.55    1.17
  -8   3   3    6.03    1.34
   8  -3  -3    4.69    1.16
   8  -3  -3    4.71    1.25
  -8   3   2   78.43    5.01
  -8   3   2   84.54    5.21
   8  -3  -2   87.03    5.09
   8  -3  -2   81.01    5.00
   8  -3  -2   83.48    4.88
   8  -3  -2   91.24    5.26
  -8   3   1   53.25    3.66
  -8   3   1   59.51    3.91
   8  -3  -1   57.92    3.84
  -8   3   0   41.60    3.09
  -8   3   0   49.02    3.34
   8  -3   0   54.69    3.46
   8  -3   0   49.05    3.26
   8  -3   0   39.03    2.88
   8  -3   0   55.11    3.41
  -8   3  -1   19.72    1.87
  -8   3  -1   21.61    1.94
   8  -3   1   24.37    2.15
   8  -3   1   23.98    2.09
   8  -3   1   16.67    1.58
   8  -3   1   23.91    2.01
  -8   3  -2   -0.66    0.71
   8  -3   2    0.67    0.90
   8  -3   2   -0.28    0.88
   8  -3   2    0.47    0.66
   8  -3   3   34.17    2.38
   8  -3   3   35.87    2.37
   8  -3   3   32.81    2.28
   8  -3   4    2.48    0.70
   8  -3   4    2.34    0.78
   8  -3   4    3.99    0.89
   8  -3   5    9.78    1.01
   8  -3   5   13.26    1.30
  -8   2   7    3.61    0.76
  -8   2   7    2.80    0.78
  -8   2   6   -0.64    0.88
   8  -2  -6   -0.31    0.74
   8  -2  -6    0.61    0.59
  -8   2   5    0.11    1.04
   8  -2  -5    0.53    0.67
   8  -2  -5    0.18    0.85
   8  -2  -5   -0.68    0.81
  -8   2   4   17.70    2.12
   8  -2  -4   15.13    1.56
   8  -2  -4   16.67    1.69
   8  -2  -4   17.76    1.83
   8  -2  -4   17.48    1.90
  -8   2   3  159.77    8.81
  -8   2   3  164.81    8.90
   8  -2  -3  154.48    8.48
   8  -2  -3  158.97    8.54
   8  -2  -3  159.99    8.46
  -8   2   2   22.58    2.39
   8  -2  -2   23.76    2.21
   8  -2  -2   21.99    2.17
   8  -2  -2   21.82    2.02
   8  -2  -2   26.48    2.39
  -8   2   1  196.54   10.45
  -8   2   1  211.86   10.62
   8  -2  -1  180.20   10.00
   8  -2  -1  209.83   10.54
  -8   2   0  241.93   12.41
  -8   2   0  230.50   12.42
   8  -2   0  253.04   12.47
   8  -2   0  244.55   12.31
   8  -2   0  228.88   12.38
  -8   2  -1   62.36    4.06
  -8   2  -1   62.91    4.11
   8  -2   1   71.85    4.25
   8  -2   1   66.48    4.05
   8  -2   1   66.92    4.12
   8  -2   1   54.11    3.68
  -8   2  -2   22.08    2.08
  -8   2  -2   22.69    2.10
   8  -2   2   26.31    2.27
   8  -2   2   24.38    2.14
   8  -2   2   25.35    2.09
   8  -2   2   22.90    2.03
  -8   2  -3   12.07    1.44
  -8   2  -3   12.45    1.55
   8  -2   3   15.04    1.67
   8  -2   3   13.00    1.55
   8  -2   3   15.20    1.61
  -8   2  -4   49.63    3.11
  -8   2  -4   51.24    3.26
   8  -2   4   54.61    3.37
   8  -2   4   53.68    3.26
   8  -2   5    2.42    0.66
   8  -2   5    2.78    0.89
  -8   2  -6    1.39    0.72
   8  -2   6    1.75    0.76
  -8   1   7   -0.07    0.71
  -8   1   6    6.12    1.16
  -8   1   6    6.32    1.28
   8  -1  -6    4.20    0.79
   8  -1  -6    4.51    0.80
   8  -1  -6    6.28    1.13
   8  -1  -6    4.45    0.79
   8  -1  -6    4.61    0.83
  -8   1   5   28.05    2.39
   8  -1  -5   21.44    1.94
   8  -1  -5   26.50    2.10
  -8   1   5   21.79    2.39
  -8   1   4    3.94    1.40
   8  -1  -4    3.36    0.85
  -8   1   4    2.73    1.37
   8  -1  -4    3.65    1.10
   8  -1  -4    2.61    1.06
   8  -1  -4    4.15    1.18
  -8   1   3    9.16    1.81
   8  -1  -3   10.29    1.40
   8  -1  -3    9.01    1.48
  -8   1   3   11.62    1.95
   8  -1  -3   11.44    1.46
  -8   1   2  336.96   16.20
   8  -1  -2  322.40   15.91
   8  -1  -2  295.42   15.58
   8  -1  -2  314.30   16.00
  -8   1   1  278.41   13.36
   8  -1  -1  262.91   13.09
   8  -1  -1  273.12   13.12
   8  -1  -1  279.24   13.25
   8  -1   0   71.04    4.42
   8  -1   0   74.81    4.33
   8  -1   0   57.92    3.80
   8  -1   0   70.05    4.43
  -8   1  -1   14.27    1.87
   8  -1   1   16.11    1.86
   8  -1   1   14.92    1.72
  -8   1  -1   14.11    1.84
   8  -1   1   16.12    1.85
   8  -1   1   14.15    1.55
  -8   1  -2    3.40    1.16
   8  -1   2    2.44    1.15
   8  -1   2    2.73    1.01
   8  -1   2    3.34    1.05
   8  -1   2    2.59    0.93
  -8   1  -3   53.55    3.72
  -8   1  -3   58.44    3.82
   8  -1   3   63.71    3.87
   8  -1   3   59.20    3.65
   8  -1   3   50.83    3.53
   8  -1   3   58.81    3.83
  -8   1  -4  207.76   11.46
  -8   1  -4  235.30   11.62
   8  -1   4  226.23   11.58
   8  -1   4  214.27   11.35
  -8   1  -5   13.95    1.38
  -8   1  -5   13.60    1.51
   8  -1   5   12.88    1.27
   8  -1   5   16.70    1.75
  -8   1  -6    0.61    0.71
  -8   1  -6    2.40    0.94
  -8   1  -6    2.50    0.86
  -8   1  -6    1.93    0.72
  -8   1  -7    0.09    0.61
  -8   1  -7    0.21    0.53
  -8   1  -7    0.11    0.39
   8  -1   7    0.56    0.61
  -8   0   7    0.85    0.67
  -8   0   6    4.87    0.99
  -8   0   6    6.55    1.23
   8   0  -6    4.12    0.84
   8   0  -6    6.44    0.95
   8   0  -6    4.36    0.87
   8   0  -6    4.45    1.08
   8   0  -6    5.05    0.90
  -8   0   5    7.63    1.39
  -8   0   5    7.55    1.57
   8   0  -5    6.62    1.20
   8   0  -5    7.37    1.12
   8   0  -5    5.00    0.96
   8   0  -5    7.59    1.35
   8   0  -5    7.43    1.15
   8   0  -5    6.73    1.03
  -8   0   4   18.70    2.03
   8   0  -4   14.80    1.54
   8   0  -4   17.30    1.86
  -8   0   4   16.07    2.15
   8   0  -4   15.38    1.55
   8   0  -4   15.28    1.78
   8   0  -4   17.27    1.83
  -8   0   3    2.50    1.30
   8   0  -3    3.04    1.02
   8   0  -3    1.96    1.12
  -8   0   3    0.63    1.42
   8   0  -3    2.93    1.05
   8   0  -3    2.59    1.14
  -8   0   2  148.21    8.02
   8   0  -2  147.00    7.80
   8   0  -2  130.65    7.43
  -8   0   1    7.54    1.70
   8   0  -1    6.85    1.43
   8   0  -1    6.63    1.49
  -8   0   1    7.64    1.74
   8   0  -1    6.35    1.08
   8   0  -1    6.17    1.50
  -8   0   0   20.69    2.25
  -8   0   0   20.85    2.26
   8   0   0   20.03    2.09
   8   0   0   23.02    2.07
   8   0   0   15.16    1.50
   8   0   0   19.90    2.15
   8   0   0   17.97    1.66
   8   0   1    2.28    1.14
   8   0   1    1.83    0.97
   8   0   1    1.47    1.08
   8   0   1    1.02    0.77
  -8   0  -2    0.72    1.13
   8   0   2    0.48    0.99
   8   0   2    1.62    0.89
   8   0   2    0.64    0.97
   8   0   2   -0.05    0.84
  -8   0  -3    3.58    1.22
   8   0   3    2.62    1.04
   8   0   3    2.92    0.92
   8   0   3    3.83    1.04
   8   0   3    2.73    1.06
  -8   0  -4    6.37    1.30
   8   0   4    7.45    1.27
   8   0   4    6.69    1.04
  -8   0  -4    6.18    1.42
   8   0   4    8.05    1.43
  -8   0  -5   -1.09    1.04
  -8   0  -5    0.44    1.07
  -8   0  -5   -0.70    1.28
  -8   0  -6   17.28    1.67
  -8   0  -6   17.55    1.59
  -8   0  -6   19.87    1.78
  -8   0  -6   19.37    1.74
   8   0   6   21.07    2.00
  -8   0  -7    1.38    0.73
  -8   0  -7    2.20    0.71
  -8   0  -7    1.77    0.69
   8   0   7    2.07    0.85
   8   1  -7    5.45    0.89
  -8  -1   6   -0.18    0.77
   8   1  -6    0.14    0.62
   8   1  -6    0.52    0.64
   8   1  -6   -0.13    0.84
   8   1  -6   -0.73    0.70
  -8  -1   5    6.74    1.17
  -8  -1   5    8.86    1.50
   8   1  -5    7.97    1.21
   8   1  -5    7.81    1.11
   8   1  -5    7.09    1.32
   8   1  -5    6.11    1.02
   8   1  -5    7.15    1.09
  -8  -1   4   13.24    1.68
   8   1  -4    9.39    1.26
  -8  -1   4    9.65    1.81
   8   1  -4   11.39    1.68
   8   1  -4   10.82    1.46
   8   1  -4   14.09    1.68
   8   1  -4    9.77    1.30
   8   1  -4   11.54    1.51
   8   1  -4   10.11    1.32
  -8  -1   3  142.11    7.74
   8   1  -3  141.39    7.61
   8   1  -3  130.59    7.45
   8   1  -3  142.28    7.75
  -8  -1   3  139.15    7.87
  -8  -1   2   -0.06    1.14
   8   1  -2    0.48    0.96
   8   1  -2    0.76    1.25
  -8  -1   2    0.80    1.31
   8   1  -2    0.18    0.83
   8   1  -2   -0.32    1.19
  -8  -1   1   52.95    3.89
  -8  -1   1   63.00    4.00
   8   1  -1   59.68    3.84
   8   1  -1   58.52    3.77
   8   1  -1   62.84    3.95
  -8  -1   0    1.11    1.18
   8   1   0    0.70    0.96
  -8  -1   0   -0.06    1.16
   8   1   0    1.21    1.10
   8   1   0    0.87    0.72
  -8  -1  -1    0.67    1.20
   8   1   1   -0.06    1.06
   8   1   1   -0.20    0.91
  -8  -1  -1   -0.12    1.18
   8   1   1    0.38    1.04
   8   1   1    0.21    0.78
  -8  -1  -2    6.28    1.53
   8   1   2    8.48    1.42
   8   1   2    6.93    1.18
  -8  -1  -2    8.99    1.57
   8   1   2    5.47    1.32
   8   1   2   10.00    1.44
   8   1   3    1.35    1.02
   8   1   3    0.56    0.74
  -8  -1  -3    1.30    1.14
   8   1   3    1.48    1.05
  -8  -1  -4    7.10    1.42
   8   1   4    7.95    1.28
   8   1   4    4.14    0.90
  -8  -1  -4    7.34    1.47
   8   1   4    9.76    1.49
  -8  -1  -5    6.63    1.31
   8   1   5    7.92    1.15
  -8  -1  -5    7.05    1.17
  -8  -1  -6    8.81    1.33
  -8  -1  -6    5.94    1.20
  -8  -1  -6    7.34    1.25
   8   1   6   10.70    1.66
  -8  -1  -7   22.04    1.76
  -8  -1  -7   22.01    1.90
  -8  -1  -7   26.26    1.88
   8   1   7   25.91    2.09
  -8  -1  -8    8.82    1.02
  -8  -1  -8   10.06    0.96
   8   1   8    9.81    1.13
  -8  -2   6    7.25    1.04
   8   2  -6    8.26    1.14
[truncated: 34,756 more chars]
